# Supplementary material
Source: MDPI journal article supplement (https://www.mdpi.com/1996-1073/12/15/2875)
Supplement: s1 [file s1]

# V1\_Results\_baseline\_IEA.dat

# \*\*\* CASO: 1, IEA ; 2, Irena : 1

#n° de simulaciones = 100000

# \*\*\*\*\* Parámetros Wind \*\*\*\*\*

#medias ec. precio Turbinas : 2.9666 -0.1860  
 #dev. est. parámetros ec. precio Turbinas : 0.0000 0.0130  
 #dev. est. ec. precio Turbinas : 0.0900  
 #valor inicial en 2014 de Cap 340.6110  
 #depreciación, Performance Ratio, kgCO2 0.984 1.000 0.780  
 #Life Span de los Turbinas 27  
 #Social Discount Rate 0.022500 0.019286  
 #WACC, Loan Maturity 0.050 15  
 #Generación aleatoria de los parámetros = T  
 #Generación aleatoria de los errs. de las ecs. = T  
 #Storage costs tenido en cuenta = T  
 #Modelo Precio Turbinas (1, old; 2, simple; 3, LR dec.; 4, LR +dec. 2

# \*\*\*\*\* Parámetros PV \*\*\*\*\*

#medias ec. precio módulos : 3.6025 -0.3200  
 #dev. est. parámetros ec. precio módulos : 0.1710 0.0240  
 #dev. est. ec. precio módulos : 0.3300  
 #valores iniciales en 2014 de Cap, Pe, Pm, Ps, upm : 157.7609 0.8229 0.7050  
 0.0760 0.0000  
 #depreciación, Performance Ratio, kgCO2 : 0.990 0.850 0.780  
 #Life Span de los módulos : 30  
 #Social Discount Rate : 0.022500 0.019286  
 #WACC, Loan Maturity : 0.090 7  
 #Generación aleatoria de los parámetros = T  
 #Generación aleatoria de los errs. de las ecs. = T  
 #Storage costs tenido en cuenta = T  
 #Modelo Precio módulos (1, old; 2, simple; 3, LR dec.; 4, LR +dec. : 2

# V1\_Results\_baseline\_IEA.dat

\*\*\*\*\*  
 \*\*\*\*\* ENERGY GENERATED \*\*\*\*\*  
 \*\*\*\*\*

Total, PV, Wind: 0.22736E+12 0.10110E+12 0.12626E+12  
 PV(%), Wind(%): 0.444660 0.555340

#\*\*\*\*\*  
 #\*\*\*\*\* ANNUAL LCE (means; US \$ per Mwh.) \*\*\*\*\*  
 #\*\*\*\*\*

| #    | Total       | PV          | Wind        |
|------|-------------|-------------|-------------|
| 2015 | 0.83565E+02 | 0.83928E+02 | 0.83304E+02 |
| 2016 | 0.79974E+02 | 0.78989E+02 | 0.80635E+02 |
| 2017 | 0.76959E+02 | 0.75036E+02 | 0.78158E+02 |
| 2018 | 0.74145E+02 | 0.71412E+02 | 0.75954E+02 |
| 2019 | 0.71441E+02 | 0.68081E+02 | 0.73889E+02 |
| 2020 | 0.69023E+02 | 0.65107E+02 | 0.71931E+02 |
| 2021 | 0.66869E+02 | 0.62394E+02 | 0.70361E+02 |
| 2022 | 0.64716E+02 | 0.59853E+02 | 0.68562E+02 |
| 2023 | 0.62829E+02 | 0.57609E+02 | 0.67063E+02 |
| 2024 | 0.61082E+02 | 0.55580E+02 | 0.65613E+02 |
| 2025 | 0.59501E+02 | 0.53655E+02 | 0.64256E+02 |
| 2026 | 0.58099E+02 | 0.51970E+02 | 0.63074E+02 |
| 2027 | 0.56900E+02 | 0.50413E+02 | 0.61948E+02 |
| 2028 | 0.55638E+02 | 0.49010E+02 | 0.60840E+02 |
| 2029 | 0.54779E+02 | 0.47760E+02 | 0.60066E+02 |
| 2030 | 0.53616E+02 | 0.46738E+02 | 0.58883E+02 |
| 2031 | 0.52258E+02 | 0.45832E+02 | 0.58500E+02 |
| 2032 | 0.51725E+02 | 0.44923E+02 | 0.57980E+02 |
| 2033 | 0.50960E+02 | 0.44223E+02 | 0.56828E+02 |
| 2034 | 0.50479E+02 | 0.43280E+02 | 0.56555E+02 |
| 2035 | 0.51074E+02 | 0.43910E+02 | 0.56572E+02 |
| 2036 | 0.49856E+02 | 0.42414E+02 | 0.55436E+02 |

V1\_Results\_baseline\_IEA.dat

|      |             |             |             |
|------|-------------|-------------|-------------|
| 2037 | 0.49093E+02 | 0.41495E+02 | 0.55213E+02 |
| 2038 | 0.48685E+02 | 0.40847E+02 | 0.54646E+02 |
| 2039 | 0.48276E+02 | 0.40312E+02 | 0.54089E+02 |
| 2040 | 0.47163E+02 | 0.39358E+02 | 0.54228E+02 |
| 2041 | 0.46788E+02 | 0.38630E+02 | 0.53459E+02 |
| 2042 | 0.46528E+02 | 0.37962E+02 | 0.52446E+02 |
| 2043 | 0.45772E+02 | 0.37261E+02 | 0.52368E+02 |
| 2044 | 0.45504E+02 | 0.36760E+02 | 0.51969E+02 |
| 2045 | 0.44809E+02 | 0.35933E+02 | 0.53301E+02 |
| 2046 | 0.45181E+02 | 0.35893E+02 | 0.53118E+02 |
| 2047 | 0.44822E+02 | 0.35336E+02 | 0.52947E+02 |
| 2048 | 0.44327E+02 | 0.34819E+02 | 0.52825E+02 |
| 2049 | 0.43505E+02 | 0.34051E+02 | 0.52758E+02 |
| 2050 | 0.43261E+02 | 0.33706E+02 | 0.52478E+02 |

```

#*****
#***** TOTAL, PV & WIND, LCE (US$/MWh): SUMMARY STATISTICS *****
#*****

```

\*\*\*\*\* Wind \*\*\*\*\*

MEAN, VARIANCE, SKW, KURT & MAX. VALUES 50%, 80%, 90%, 95%

0.612E+02 0.115E+03 0.576E+00 0.363E+01 0.601E+02 0.697E+02 0.753E+02 0.802E+02

LCE EXPECT. / ( LCE > LCE max. at 80%, 90%, 95%)

0.7673E+02 0.8164E+02 0.8640E+02

\*\*\*\*\* PV \*\*\*\*\*

MEAN, VARIANCE, SKW, KURT & MAX. VALUES 50%, 80%, 90%, 95%

V1\_Results\_baseline\_IEA.dat

0.487E+02 0.667E+02 0.122E+01 0.571E+01 0.471E+02 0.545E+02 0.592E+02 0.640E+02

LCE EXPECT. / ( LCE > LCE max. al 80%, 90%, 95%)

0.6117E+02 0.6639E+02 0.7064E+02

\*\*\*\*\* Total \*\*\*\*\*

MEAN, VARIANCE, SKW, KURT & MAX. VALUES 50%, 80%, 90%, 95%

0.557E+02 0.486E+02 0.523E+00 0.354E+01 0.550E+02 0.612E+02 0.648E+02 0.679E+02

LCE EXPECT. / ( LCE > LCE max. al 80%, 90%, 95%)

0.6567E+02 0.6851E+02 0.7225E+02

#\*\*\*\*\*  
#\*\*\*\*\* TOTAL LCE (US\$/MWh): SUMMARY STATISTICS; ALL YEARS: 2015 - 2050 \*\*\*\*\*  
#\*\*\*\*\*

# MEAN, VARIANCE, SKW, KURT, INT: 2.5%, 50%, 80%, 90%, 95%, 97.5%

|   |           |           |           |           |           |           |           |           |
|---|-----------|-----------|-----------|-----------|-----------|-----------|-----------|-----------|
| 1 | 0.836E+02 | 0.142E+03 | 0.748E+00 | 0.430E+01 | 0.638E+02 | 0.823E+02 | 0.928E+02 | 0.991E+02 |
|   | 0.105E+03 | 0.110E+03 |           |           |           |           |           |           |
| 2 | 0.800E+02 | 0.129E+03 | 0.694E+00 | 0.409E+01 | 0.611E+02 | 0.786E+02 | 0.886E+02 | 0.946E+02 |
|   | 0.100E+03 | 0.105E+03 |           |           |           |           |           |           |
| 3 | 0.770E+02 | 0.120E+03 | 0.660E+00 | 0.396E+01 | 0.585E+02 | 0.756E+02 | 0.855E+02 | 0.912E+02 |
|   | 0.964E+02 | 0.102E+03 |           |           |           |           |           |           |
| 4 | 0.741E+02 | 0.111E+03 | 0.661E+00 | 0.396E+01 | 0.564E+02 | 0.729E+02 | 0.824E+02 | 0.879E+02 |
|   | 0.929E+02 | 0.974E+02 |           |           |           |           |           |           |
| 5 | 0.714E+02 | 0.104E+03 | 0.719E+00 | 0.425E+01 | 0.545E+02 | 0.704E+02 | 0.794E+02 | 0.845E+02 |

V1\_Results\_baseline\_IEA.dat

|           |           |           |           |           |           |           |           |           |  |
|-----------|-----------|-----------|-----------|-----------|-----------|-----------|-----------|-----------|--|
| 0.895E+02 | 0.942E+02 |           |           |           |           |           |           |           |  |
| 6         | 0.690E+02 | 0.978E+02 | 0.697E+00 | 0.409E+01 | 0.525E+02 | 0.678E+02 | 0.766E+02 | 0.820E+02 |  |
| 0.867E+02 | 0.910E+02 |           |           |           |           |           |           |           |  |
| 7         | 0.669E+02 | 0.926E+02 | 0.734E+00 | 0.425E+01 | 0.509E+02 | 0.657E+02 | 0.741E+02 | 0.794E+02 |  |
| 0.840E+02 | 0.885E+02 |           |           |           |           |           |           |           |  |
| 8         | 0.647E+02 | 0.863E+02 | 0.726E+00 | 0.415E+01 | 0.495E+02 | 0.636E+02 | 0.718E+02 | 0.767E+02 |  |
| 0.813E+02 | 0.856E+02 |           |           |           |           |           |           |           |  |
| 9         | 0.628E+02 | 0.825E+02 | 0.739E+00 | 0.427E+01 | 0.479E+02 | 0.617E+02 | 0.698E+02 | 0.745E+02 |  |
| 0.789E+02 | 0.832E+02 |           |           |           |           |           |           |           |  |
| 10        | 0.611E+02 | 0.783E+02 | 0.749E+00 | 0.432E+01 | 0.464E+02 | 0.600E+02 | 0.679E+02 | 0.724E+02 |  |
| 0.770E+02 | 0.811E+02 |           |           |           |           |           |           |           |  |
| 11        | 0.595E+02 | 0.744E+02 | 0.697E+00 | 0.407E+01 | 0.452E+02 | 0.585E+02 | 0.662E+02 | 0.706E+02 |  |
| 0.749E+02 | 0.787E+02 |           |           |           |           |           |           |           |  |
| 12        | 0.581E+02 | 0.719E+02 | 0.709E+00 | 0.406E+01 | 0.442E+02 | 0.572E+02 | 0.647E+02 | 0.691E+02 |  |
| 0.732E+02 | 0.770E+02 |           |           |           |           |           |           |           |  |
| 13        | 0.569E+02 | 0.693E+02 | 0.679E+00 | 0.395E+01 | 0.430E+02 | 0.560E+02 | 0.633E+02 | 0.677E+02 |  |
| 0.717E+02 | 0.754E+02 |           |           |           |           |           |           |           |  |
| 14        | 0.556E+02 | 0.667E+02 | 0.677E+00 | 0.394E+01 | 0.421E+02 | 0.548E+02 | 0.619E+02 | 0.662E+02 |  |
| 0.702E+02 | 0.739E+02 |           |           |           |           |           |           |           |  |
| 15        | 0.548E+02 | 0.656E+02 | 0.683E+00 | 0.396E+01 | 0.413E+02 | 0.538E+02 | 0.611E+02 | 0.653E+02 |  |
| 0.692E+02 | 0.729E+02 |           |           |           |           |           |           |           |  |
| 16        | 0.536E+02 | 0.621E+02 | 0.657E+00 | 0.389E+01 | 0.405E+02 | 0.526E+02 | 0.598E+02 | 0.638E+02 |  |
| 0.676E+02 | 0.710E+02 |           |           |           |           |           |           |           |  |
| 17        | 0.523E+02 | 0.584E+02 | 0.754E+00 | 0.423E+01 | 0.397E+02 | 0.512E+02 | 0.581E+02 | 0.622E+02 |  |
| 0.659E+02 | 0.695E+02 |           |           |           |           |           |           |           |  |
| 18        | 0.517E+02 | 0.577E+02 | 0.729E+00 | 0.418E+01 | 0.392E+02 | 0.508E+02 | 0.574E+02 | 0.615E+02 |  |
| 0.654E+02 | 0.687E+02 |           |           |           |           |           |           |           |  |
| 19        | 0.510E+02 | 0.569E+02 | 0.703E+00 | 0.408E+01 | 0.385E+02 | 0.502E+02 | 0.568E+02 | 0.607E+02 |  |
| 0.644E+02 | 0.678E+02 |           |           |           |           |           |           |           |  |
| 20        | 0.505E+02 | 0.561E+02 | 0.675E+00 | 0.392E+01 | 0.379E+02 | 0.496E+02 | 0.562E+02 | 0.603E+02 |  |
| 0.639E+02 | 0.672E+02 |           |           |           |           |           |           |           |  |
| 21        | 0.511E+02 | 0.566E+02 | 0.666E+00 | 0.395E+01 | 0.385E+02 | 0.502E+02 | 0.570E+02 | 0.608E+02 |  |
| 0.644E+02 | 0.678E+02 |           |           |           |           |           |           |           |  |
| 22        | 0.499E+02 | 0.559E+02 | 0.644E+00 | 0.381E+01 | 0.374E+02 | 0.491E+02 | 0.556E+02 | 0.596E+02 |  |
| 0.632E+02 | 0.665E+02 |           |           |           |           |           |           |           |  |
| 23        | 0.491E+02 | 0.543E+02 | 0.698E+00 | 0.412E+01 | 0.368E+02 | 0.483E+02 | 0.547E+02 | 0.586E+02 |  |

# V1\_Results\_baseline\_IEA.dat

|           |           |           |           |           |           |           |           |           |  |
|-----------|-----------|-----------|-----------|-----------|-----------|-----------|-----------|-----------|--|
| 0.622E+02 | 0.654E+02 |           |           |           |           |           |           |           |  |
| 24        | 0.487E+02 | 0.542E+02 | 0.644E+00 | 0.381E+01 | 0.363E+02 | 0.479E+02 | 0.544E+02 | 0.583E+02 |  |
| 0.619E+02 | 0.651E+02 |           |           |           |           |           |           |           |  |
| 25        | 0.483E+02 | 0.541E+02 | 0.653E+00 | 0.385E+01 | 0.361E+02 | 0.474E+02 | 0.540E+02 | 0.578E+02 |  |
| 0.614E+02 | 0.647E+02 |           |           |           |           |           |           |           |  |
| 26        | 0.472E+02 | 0.501E+02 | 0.709E+00 | 0.406E+01 | 0.354E+02 | 0.463E+02 | 0.525E+02 | 0.563E+02 |  |
| 0.598E+02 | 0.630E+02 |           |           |           |           |           |           |           |  |
| 27        | 0.468E+02 | 0.509E+02 | 0.670E+00 | 0.394E+01 | 0.349E+02 | 0.461E+02 | 0.523E+02 | 0.560E+02 |  |
| 0.596E+02 | 0.626E+02 |           |           |           |           |           |           |           |  |
| 28        | 0.465E+02 | 0.531E+02 | 0.640E+00 | 0.380E+01 | 0.343E+02 | 0.457E+02 | 0.522E+02 | 0.561E+02 |  |
| 0.594E+02 | 0.626E+02 |           |           |           |           |           |           |           |  |
| 29        | 0.458E+02 | 0.508E+02 | 0.703E+00 | 0.419E+01 | 0.339E+02 | 0.450E+02 | 0.513E+02 | 0.550E+02 |  |
| 0.584E+02 | 0.615E+02 |           |           |           |           |           |           |           |  |
| 30        | 0.455E+02 | 0.505E+02 | 0.667E+00 | 0.394E+01 | 0.337E+02 | 0.447E+02 | 0.510E+02 | 0.547E+02 |  |
| 0.582E+02 | 0.613E+02 |           |           |           |           |           |           |           |  |
| 31        | 0.448E+02 | 0.490E+02 | 0.717E+00 | 0.406E+01 | 0.332E+02 | 0.440E+02 | 0.502E+02 | 0.539E+02 |  |
| 0.572E+02 | 0.606E+02 |           |           |           |           |           |           |           |  |
| 32        | 0.452E+02 | 0.503E+02 | 0.699E+00 | 0.417E+01 | 0.333E+02 | 0.443E+02 | 0.506E+02 | 0.544E+02 |  |
| 0.577E+02 | 0.610E+02 |           |           |           |           |           |           |           |  |
| 33        | 0.448E+02 | 0.501E+02 | 0.692E+00 | 0.401E+01 | 0.331E+02 | 0.440E+02 | 0.502E+02 | 0.541E+02 |  |
| 0.574E+02 | 0.606E+02 |           |           |           |           |           |           |           |  |
| 34        | 0.443E+02 | 0.493E+02 | 0.706E+00 | 0.408E+01 | 0.326E+02 | 0.435E+02 | 0.496E+02 | 0.534E+02 |  |
| 0.568E+02 | 0.600E+02 |           |           |           |           |           |           |           |  |
| 35        | 0.435E+02 | 0.479E+02 | 0.741E+00 | 0.424E+01 | 0.321E+02 | 0.426E+02 | 0.489E+02 | 0.524E+02 |  |
| 0.559E+02 | 0.590E+02 |           |           |           |           |           |           |           |  |
| 36        | 0.433E+02 | 0.476E+02 | 0.727E+00 | 0.418E+01 | 0.319E+02 | 0.425E+02 | 0.486E+02 | 0.522E+02 |  |
| 0.555E+02 | 0.587E+02 |           |           |           |           |           |           |           |  |

```

#*****
# p.d.f. & C.d.f LCE (US$/MWh): TOTAL, PV, WIND (Smoothed, NOT standardised)
#*****
#           Total           PV           Wind
#
# ***** NOT standardised *****

```

| V1_Results_baseline_IEA.dat |            |            |            |            |            |            |            |
|-----------------------------|------------|------------|------------|------------|------------|------------|------------|
| -200                        | 0.3199E+02 | 0.4527E-05 | 0.7678E-06 | 0.1432E+00 | 0.7714E-05 | 0.2210E-05 | 0.2847E+02 |
| 0.7126E-05                  | 0.1824E-05 |            |            |            |            |            |            |
| -195                        | 0.3284E+02 | 0.6672E-05 | 0.5103E-05 | 0.1576E+01 | 0.2607E-05 | 0.9846E-05 | 0.2975E+02 |
| 0.1700E-04                  | 0.1789E-04 |            |            |            |            |            |            |
| -190                        | 0.3369E+02 | 0.2313E-04 | 0.1788E-04 | 0.3008E+01 | 0.0000E+00 | 0.1001E-04 | 0.3103E+02 |
| 0.4821E-04                  | 0.5964E-04 |            |            |            |            |            |            |
| -185                        | 0.3453E+02 | 0.4609E-04 | 0.5028E-04 | 0.4440E+01 | 0.0000E+00 | 0.1001E-04 | 0.3231E+02 |
| 0.1167E-03                  | 0.1692E-03 |            |            |            |            |            |            |
| -180                        | 0.3538E+02 | 0.6612E-04 | 0.9835E-04 | 0.5873E+01 | 0.0000E+00 | 0.1001E-04 | 0.3359E+02 |
| 0.2614E-03                  | 0.4182E-03 |            |            |            |            |            |            |
| -175                        | 0.3623E+02 | 0.1322E-03 | 0.1848E-03 | 0.7305E+01 | 0.0000E+00 | 0.1001E-04 | 0.3487E+02 |
| 0.4973E-03                  | 0.9245E-03 |            |            |            |            |            |            |
| -170                        | 0.3708E+02 | 0.3132E-03 | 0.3772E-03 | 0.8738E+01 | 0.0000E+00 | 0.1001E-04 | 0.3615E+02 |
| 0.8459E-03                  | 0.1815E-02 |            |            |            |            |            |            |
| -165                        | 0.3793E+02 | 0.5811E-03 | 0.7738E-03 | 0.1017E+02 | 0.0000E+00 | 0.1001E-04 | 0.3743E+02 |
| 0.1435E-02                  | 0.3321E-02 |            |            |            |            |            |            |
| -160                        | 0.3877E+02 | 0.9886E-03 | 0.1457E-02 | 0.1160E+02 | 0.0000E+00 | 0.1001E-04 | 0.3871E+02 |
| 0.2282E-02                  | 0.5776E-02 |            |            |            |            |            |            |
| -155                        | 0.3962E+02 | 0.1658E-02 | 0.2615E-02 | 0.1303E+02 | 0.0000E+00 | 0.1001E-04 | 0.3999E+02 |
| 0.3525E-02                  | 0.9611E-02 |            |            |            |            |            |            |
| -150                        | 0.4047E+02 | 0.2817E-02 | 0.4577E-02 | 0.1447E+02 | 0.0000E+00 | 0.1001E-04 | 0.4127E+02 |
| 0.5100E-02                  | 0.1531E-01 |            |            |            |            |            |            |
| -145                        | 0.4132E+02 | 0.4417E-02 | 0.7744E-02 | 0.1590E+02 | 0.0000E+00 | 0.1001E-04 | 0.4255E+02 |
| 0.7138E-02                  | 0.2336E-01 |            |            |            |            |            |            |
| -140                        | 0.4217E+02 | 0.6662E-02 | 0.1259E-01 | 0.1733E+02 | 0.0000E+00 | 0.1001E-04 | 0.4383E+02 |
| 0.9525E-02                  | 0.3428E-01 |            |            |            |            |            |            |
| -135                        | 0.4302E+02 | 0.9424E-02 | 0.1961E-01 | 0.1876E+02 | 0.0000E+00 | 0.1001E-04 | 0.4511E+02 |
| 0.1240E-01                  | 0.4861E-01 |            |            |            |            |            |            |
| -130                        | 0.4386E+02 | 0.1294E-01 | 0.2933E-01 | 0.2020E+02 | 0.0000E+00 | 0.1001E-04 | 0.4639E+02 |
| 0.1584E-01                  | 0.6708E-01 |            |            |            |            |            |            |
| -125                        | 0.4471E+02 | 0.1698E-01 | 0.4230E-01 | 0.2163E+02 | 0.0000E+00 | 0.1001E-04 | 0.4767E+02 |
| 0.1968E-01                  | 0.9029E-01 |            |            |            |            |            |            |
| -120                        | 0.4556E+02 | 0.2179E-01 | 0.5913E-01 | 0.2306E+02 | 0.0000E+00 | 0.1001E-04 | 0.4895E+02 |
| 0.2354E-01                  | 0.1184E+00 |            |            |            |            |            |            |
| -115                        | 0.4641E+02 | 0.2689E-01 | 0.8017E-01 | 0.2449E+02 | 0.0000E+00 | 0.1001E-04 | 0.5023E+02 |
| 0.2712E-01                  | 0.1513E+00 |            |            |            |            |            |            |

| V1_Results_baseline_IEA.dat |            |            |            |            |            |            |            |
|-----------------------------|------------|------------|------------|------------|------------|------------|------------|
| -110                        | 0.4726E+02 | 0.3249E-01 | 0.1058E+00 | 0.2593E+02 | 0.0000E+00 | 0.1001E-04 | 0.5151E+02 |
| 0.3019E-01                  | 0.1885E+00 |            |            |            |            |            |            |
| -105                        | 0.4810E+02 | 0.3793E-01 | 0.1362E+00 | 0.2736E+02 | 0.0000E+00 | 0.1001E-04 | 0.5279E+02 |
| 0.3278E-01                  | 0.2291E+00 |            |            |            |            |            |            |
| -100                        | 0.4895E+02 | 0.4310E-01 | 0.1710E+00 | 0.2879E+02 | 0.0000E+00 | 0.1001E-04 | 0.5407E+02 |
| 0.3491E-01                  | 0.2728E+00 |            |            |            |            |            |            |
| -95                         | 0.4980E+02 | 0.4780E-01 | 0.2100E+00 | 0.3022E+02 | 0.1191E-05 | 0.1035E-04 | 0.5535E+02 |
| 0.3632E-01                  | 0.3186E+00 |            |            |            |            |            |            |
| -90                         | 0.5065E+02 | 0.5171E-01 | 0.2525E+00 | 0.3166E+02 | 0.1228E-03 | 0.8915E-04 | 0.5663E+02 |
| 0.3754E-01                  | 0.3660E+00 |            |            |            |            |            |            |
| -85                         | 0.5150E+02 | 0.5459E-01 | 0.2980E+00 | 0.3309E+02 | 0.7943E-03 | 0.7214E-03 | 0.5791E+02 |
| 0.3850E-01                  | 0.4148E+00 |            |            |            |            |            |            |
| -80                         | 0.5234E+02 | 0.5669E-01 | 0.3454E+00 | 0.3452E+02 | 0.3502E-02 | 0.3870E-02 | 0.5919E+02 |
| 0.3890E-01                  | 0.4645E+00 |            |            |            |            |            |            |
| -75                         | 0.5319E+02 | 0.5817E-01 | 0.3943E+00 | 0.3595E+02 | 0.9576E-02 | 0.1371E-01 | 0.6047E+02 |
| 0.3811E-01                  | 0.5138E+00 |            |            |            |            |            |            |
| -70                         | 0.5404E+02 | 0.5864E-01 | 0.4439E+00 | 0.3739E+02 | 0.1897E-01 | 0.3509E-01 | 0.6175E+02 |
| 0.3659E-01                  | 0.5615E+00 |            |            |            |            |            |            |
| -65                         | 0.5489E+02 | 0.5822E-01 | 0.4935E+00 | 0.3882E+02 | 0.3053E-01 | 0.7212E-01 | 0.6303E+02 |
| 0.3487E-01                  | 0.6070E+00 |            |            |            |            |            |            |
| -60                         | 0.5574E+02 | 0.5673E-01 | 0.5422E+00 | 0.4025E+02 | 0.4175E-01 | 0.1257E+00 | 0.6431E+02 |
| 0.3299E-01                  | 0.6502E+00 |            |            |            |            |            |            |
| -55                         | 0.5659E+02 | 0.5458E-01 | 0.5893E+00 | 0.4168E+02 | 0.5078E-01 | 0.1936E+00 | 0.6559E+02 |
| 0.3080E-01                  | 0.6908E+00 |            |            |            |            |            |            |
| -50                         | 0.5743E+02 | 0.5176E-01 | 0.6341E+00 | 0.4312E+02 | 0.5623E-01 | 0.2715E+00 | 0.6687E+02 |
| 0.2828E-01                  | 0.7283E+00 |            |            |            |            |            |            |
| -45                         | 0.5828E+02 | 0.4861E-01 | 0.6765E+00 | 0.4455E+02 | 0.5761E-01 | 0.3537E+00 | 0.6815E+02 |
| 0.2585E-01                  | 0.7626E+00 |            |            |            |            |            |            |
| -40                         | 0.5913E+02 | 0.4517E-01 | 0.7159E+00 | 0.4598E+02 | 0.5618E-01 | 0.4352E+00 | 0.6943E+02 |
| 0.2364E-01                  | 0.7940E+00 |            |            |            |            |            |            |
| -35                         | 0.5998E+02 | 0.4168E-01 | 0.7524E+00 | 0.4741E+02 | 0.5347E-01 | 0.5135E+00 | 0.7071E+02 |
| 0.2135E-01                  | 0.8225E+00 |            |            |            |            |            |            |
| -30                         | 0.6083E+02 | 0.3831E-01 | 0.7861E+00 | 0.4884E+02 | 0.4891E-01 | 0.5864E+00 | 0.7199E+02 |
| 0.1890E-01                  | 0.8479E+00 |            |            |            |            |            |            |
| -25                         | 0.6167E+02 | 0.3434E-01 | 0.8166E+00 | 0.5028E+02 | 0.4347E-01 | 0.6518E+00 | 0.7327E+02 |
| 0.1668E-01                  | 0.8704E+00 |            |            |            |            |            |            |



| V1_Results_baseline_IEA.dat |            |            |            |            |            |            |            |  |
|-----------------------------|------------|------------|------------|------------|------------|------------|------------|--|
| -20                         | 0.6252E+02 | 0.3040E-01 | 0.8437E+00 | 0.5171E+02 | 0.3859E-01 | 0.7098E+00 | 0.7455E+02 |  |
| 0.1457E-01                  | 0.8901E+00 |            |            |            |            |            |            |  |
| -15                         | 0.6337E+02 | 0.2656E-01 | 0.8675E+00 | 0.5314E+02 | 0.3330E-01 | 0.7606E+00 | 0.7583E+02 |  |
| 0.1267E-01                  | 0.9073E+00 |            |            |            |            |            |            |  |
| -10                         | 0.6422E+02 | 0.2338E-01 | 0.8884E+00 | 0.5457E+02 | 0.2779E-01 | 0.8036E+00 | 0.7711E+02 |  |
| 0.1092E-01                  | 0.9222E+00 |            |            |            |            |            |            |  |
| -5                          | 0.6507E+02 | 0.2019E-01 | 0.9066E+00 | 0.5601E+02 | 0.2307E-01 | 0.8391E+00 | 0.7839E+02 |  |
| 0.9410E-02                  | 0.9350E+00 |            |            |            |            |            |            |  |
| 0                           | 0.6591E+02 | 0.1719E-01 | 0.9222E+00 | 0.5744E+02 | 0.1934E-01 | 0.8689E+00 | 0.7967E+02 |  |
| 0.7990E-02                  | 0.9459E+00 |            |            |            |            |            |            |  |
| 5                           | 0.6676E+02 | 0.1438E-01 | 0.9353E+00 | 0.5887E+02 | 0.1598E-01 | 0.8937E+00 | 0.8095E+02 |  |
| 0.6642E-02                  | 0.9551E+00 |            |            |            |            |            |            |  |
| 10                          | 0.6761E+02 | 0.1212E-01 | 0.9463E+00 | 0.6030E+02 | 0.1287E-01 | 0.9138E+00 | 0.8223E+02 |  |
| 0.5578E-02                  | 0.9627E+00 |            |            |            |            |            |            |  |
| 15                          | 0.6846E+02 | 0.1029E-01 | 0.9556E+00 | 0.6174E+02 | 0.1048E-01 | 0.9301E+00 | 0.8351E+02 |  |
| 0.4775E-02                  | 0.9692E+00 |            |            |            |            |            |            |  |
| 20                          | 0.6931E+02 | 0.8692E-02 | 0.9635E+00 | 0.6317E+02 | 0.8624E-02 | 0.9435E+00 | 0.8479E+02 |  |
| 0.4061E-02                  | 0.9748E+00 |            |            |            |            |            |            |  |
| 25                          | 0.7015E+02 | 0.7283E-02 | 0.9702E+00 | 0.6460E+02 | 0.7185E-02 | 0.9545E+00 | 0.8607E+02 |  |
| 0.3265E-02                  | 0.9794E+00 |            |            |            |            |            |            |  |
| 30                          | 0.7100E+02 | 0.6052E-02 | 0.9757E+00 | 0.6603E+02 | 0.5811E-02 | 0.9636E+00 | 0.8735E+02 |  |
| 0.2636E-02                  | 0.9831E+00 |            |            |            |            |            |            |  |
| 35                          | 0.7185E+02 | 0.5055E-02 | 0.9803E+00 | 0.6747E+02 | 0.4636E-02 | 0.9709E+00 | 0.8863E+02 |  |
| 0.2207E-02                  | 0.9861E+00 |            |            |            |            |            |            |  |
| 40                          | 0.7270E+02 | 0.4049E-02 | 0.9841E+00 | 0.6890E+02 | 0.3739E-02 | 0.9768E+00 | 0.8991E+02 |  |
| 0.1866E-02                  | 0.9887E+00 |            |            |            |            |            |            |  |
| 45                          | 0.7355E+02 | 0.3275E-02 | 0.9871E+00 | 0.7033E+02 | 0.2843E-02 | 0.9814E+00 | 0.9119E+02 |  |
| 0.1502E-02                  | 0.9908E+00 |            |            |            |            |            |            |  |
| 50                          | 0.7440E+02 | 0.2665E-02 | 0.9896E+00 | 0.7176E+02 | 0.2230E-02 | 0.9849E+00 | 0.9247E+02 |  |
| 0.1218E-02                  | 0.9925E+00 |            |            |            |            |            |            |  |
| 55                          | 0.7524E+02 | 0.2212E-02 | 0.9916E+00 | 0.7320E+02 | 0.1866E-02 | 0.9878E+00 | 0.9374E+02 |  |
| 0.9981E-03                  | 0.9938E+00 |            |            |            |            |            |            |  |
| 60                          | 0.7609E+02 | 0.1825E-02 | 0.9933E+00 | 0.7463E+02 | 0.1524E-02 | 0.9902E+00 | 0.9502E+02 |  |
| 0.8328E-03                  | 0.9950E+00 |            |            |            |            |            |            |  |
| 65                          | 0.7694E+02 | 0.1527E-02 | 0.9947E+00 | 0.7606E+02 | 0.1221E-02 | 0.9921E+00 | 0.9630E+02 |  |
| 0.6539E-03                  | 0.9959E+00 |            |            |            |            |            |            |  |

| V1_Results_baseline_IEA.dat |            |            |            |            |            |            |            |  |
|-----------------------------|------------|------------|------------|------------|------------|------------|------------|--|
| 70                          | 0.7779E+02 | 0.1247E-02 | 0.9958E+00 | 0.7749E+02 | 0.9901E-03 | 0.9936E+00 | 0.9758E+02 |  |
| 0.5573E-03                  | 0.9967E+00 |            |            |            |            |            |            |  |
| 75                          | 0.7864E+02 | 0.9668E-03 | 0.9967E+00 | 0.7892E+02 | 0.8032E-03 | 0.9949E+00 | 0.9886E+02 |  |
| 0.4904E-03                  | 0.9973E+00 |            |            |            |            |            |            |  |
| 80                          | 0.7948E+02 | 0.7227E-03 | 0.9974E+00 | 0.8036E+02 | 0.6598E-03 | 0.9959E+00 | 0.1001E+03 |  |
| 0.4382E-03                  | 0.9979E+00 |            |            |            |            |            |            |  |
| 85                          | 0.8033E+02 | 0.5772E-03 | 0.9980E+00 | 0.8179E+02 | 0.5111E-03 | 0.9967E+00 | 0.1014E+03 |  |
| 0.3373E-03                  | 0.9984E+00 |            |            |            |            |            |            |  |
| 90                          | 0.8118E+02 | 0.4889E-03 | 0.9984E+00 | 0.8322E+02 | 0.4287E-03 | 0.9974E+00 | 0.1027E+03 |  |
| 0.2449E-03                  | 0.9988E+00 |            |            |            |            |            |            |  |
| 95                          | 0.8203E+02 | 0.3955E-03 | 0.9988E+00 | 0.8465E+02 | 0.3408E-03 | 0.9979E+00 | 0.1040E+03 |  |
| 0.1787E-03                  | 0.9990E+00 |            |            |            |            |            |            |  |
| 100                         | 0.8288E+02 | 0.2684E-03 | 0.9990E+00 | 0.8609E+02 | 0.2585E-03 | 0.9983E+00 | 0.1053E+03 |  |
| 0.1482E-03                  | 0.9992E+00 |            |            |            |            |            |            |  |
| 105                         | 0.8372E+02 | 0.1814E-03 | 0.9992E+00 | 0.8752E+02 | 0.2258E-03 | 0.9987E+00 | 0.1065E+03 |  |
| 0.1063E-03                  | 0.9994E+00 |            |            |            |            |            |            |  |
| 110                         | 0.8457E+02 | 0.1569E-03 | 0.9994E+00 | 0.8895E+02 | 0.1731E-03 | 0.9989E+00 | 0.1078E+03 |  |
| 0.7395E-04                  | 0.9995E+00 |            |            |            |            |            |            |  |
| 115                         | 0.8542E+02 | 0.1368E-03 | 0.9995E+00 | 0.9038E+02 | 0.1169E-03 | 0.9991E+00 | 0.1091E+03 |  |
| 0.4539E-04                  | 0.9996E+00 |            |            |            |            |            |            |  |
| 120                         | 0.8627E+02 | 0.1178E-03 | 0.9996E+00 | 0.9182E+02 | 0.1015E-03 | 0.9993E+00 | 0.1104E+03 |  |
| 0.4659E-04                  | 0.9996E+00 |            |            |            |            |            |            |  |
| 125                         | 0.8712E+02 | 0.8216E-04 | 0.9997E+00 | 0.9325E+02 | 0.7387E-04 | 0.9994E+00 | 0.1117E+03 |  |
| 0.5710E-04                  | 0.9997E+00 |            |            |            |            |            |            |  |
| 130                         | 0.8797E+02 | 0.5698E-04 | 0.9997E+00 | 0.9468E+02 | 0.5840E-04 | 0.9995E+00 | 0.1129E+03 |  |
| 0.5209E-04                  | 0.9998E+00 |            |            |            |            |            |            |  |
| 135                         | 0.8881E+02 | 0.5275E-04 | 0.9998E+00 | 0.9611E+02 | 0.7602E-04 | 0.9996E+00 | 0.1142E+03 |  |
| 0.3098E-04                  | 0.9998E+00 |            |            |            |            |            |            |  |
| 140                         | 0.8966E+02 | 0.5081E-04 | 0.9998E+00 | 0.9755E+02 | 0.7294E-04 | 0.9997E+00 | 0.1155E+03 |  |
| 0.1351E-04                  | 0.9999E+00 |            |            |            |            |            |            |  |
| 145                         | 0.9051E+02 | 0.3556E-04 | 0.9998E+00 | 0.9898E+02 | 0.5085E-04 | 0.9998E+00 | 0.1168E+03 |  |
| 0.1029E-04                  | 0.9999E+00 |            |            |            |            |            |            |  |
| 150                         | 0.9136E+02 | 0.1449E-04 | 0.9999E+00 | 0.1004E+03 | 0.3543E-04 | 0.9998E+00 | 0.1181E+03 |  |
| 0.1161E-04                  | 0.9999E+00 |            |            |            |            |            |            |  |
| 155                         | 0.9221E+02 | 0.1811E-04 | 0.9999E+00 | 0.1018E+03 | 0.2103E-04 | 0.9999E+00 | 0.1193E+03 |  |
| 0.1617E-04                  | 0.9999E+00 |            |            |            |            |            |            |  |

V1\_Results\_baseline\_IEA.dat

|            |            |            |            |            |            |            |            |
|------------|------------|------------|------------|------------|------------|------------|------------|
| 160        | 0.9305E+02 | 0.1772E-04 | 0.9999E+00 | 0.1033E+03 | 0.1149E-04 | 0.9999E+00 | 0.1206E+03 |
| 0.1639E-04 | 0.9999E+00 |            |            |            |            |            |            |
| 165        | 0.9390E+02 | 0.2192E-04 | 0.9999E+00 | 0.1047E+03 | 0.1574E-04 | 0.9999E+00 | 0.1219E+03 |
| 0.1496E-04 | 0.9999E+00 |            |            |            |            |            |            |
| 170        | 0.9475E+02 | 0.2305E-04 | 0.9999E+00 | 0.1061E+03 | 0.1373E-04 | 0.9999E+00 | 0.1232E+03 |
| 0.9736E-05 | 0.1000E+01 |            |            |            |            |            |            |
| 175        | 0.9560E+02 | 0.2228E-04 | 0.1000E+01 | 0.1076E+03 | 0.8577E-05 | 0.1000E+01 | 0.1245E+03 |
| 0.6233E-05 | 0.1000E+01 |            |            |            |            |            |            |
| 180        | 0.9645E+02 | 0.9864E-05 | 0.1000E+01 | 0.1090E+03 | 0.7090E-05 | 0.1000E+01 | 0.1257E+03 |
| 0.4015E-05 | 0.1000E+01 |            |            |            |            |            |            |
| 185        | 0.9729E+02 | 0.4628E-05 | 0.1000E+01 | 0.1104E+03 | 0.9155E-05 | 0.1000E+01 | 0.1270E+03 |
| 0.3255E-05 | 0.1000E+01 |            |            |            |            |            |            |
| 190        | 0.9814E+02 | 0.1022E-04 | 0.1000E+01 | 0.1119E+03 | 0.6984E-05 | 0.1000E+01 | 0.1283E+03 |
| 0.5286E-05 | 0.1000E+01 |            |            |            |            |            |            |
| 195        | 0.9899E+02 | 0.1611E-04 | 0.1000E+01 | 0.1133E+03 | 0.1304E-05 | 0.1000E+01 | 0.1296E+03 |
| 0.6373E-05 | 0.1000E+01 |            |            |            |            |            |            |
| 200        | 0.9984E+02 | 0.1318E-04 | 0.1000E+01 | 0.1147E+03 | 0.3857E-05 | 0.1000E+01 | 0.1309E+03 |
| 0.4806E-05 | 0.1000E+01 |            |            |            |            |            |            |

| #    | *****       | Standardised | *****       |            |             |            |
|------|-------------|--------------|-------------|------------|-------------|------------|
| -200 | -0.3394E+01 | 0.3156E-04   | -0.2042E+01 | 0.1735E-02 | -0.3051E+01 | 0.7644E-04 |
| -195 | -0.3272E+01 | 0.4652E-04   | -0.1916E+01 | 0.6410E-02 | -0.2932E+01 | 0.1824E-03 |
| -190 | -0.3151E+01 | 0.1613E-03   | -0.1789E+01 | 0.1995E-01 | -0.2812E+01 | 0.5172E-03 |
| -185 | -0.3029E+01 | 0.3214E-03   | -0.1662E+01 | 0.4674E-01 | -0.2693E+01 | 0.1252E-02 |
| -180 | -0.2907E+01 | 0.4610E-03   | -0.1536E+01 | 0.8859E-01 | -0.2574E+01 | 0.2805E-02 |
| -175 | -0.2786E+01 | 0.9216E-03   | -0.1409E+01 | 0.1443E+00 | -0.2454E+01 | 0.5335E-02 |
| -170 | -0.2664E+01 | 0.2184E-02   | -0.1282E+01 | 0.2112E+00 | -0.2335E+01 | 0.9074E-02 |
| -165 | -0.2542E+01 | 0.4051E-02   | -0.1156E+01 | 0.2804E+00 | -0.2216E+01 | 0.1539E-01 |
| -160 | -0.2421E+01 | 0.6893E-02   | -0.1029E+01 | 0.3448E+00 | -0.2097E+01 | 0.2448E-01 |
| -155 | -0.2299E+01 | 0.1156E-01   | -0.9022E+00 | 0.3997E+00 | -0.1977E+01 | 0.3782E-01 |
| -150 | -0.2177E+01 | 0.1964E-01   | -0.7755E+00 | 0.4407E+00 | -0.1858E+01 | 0.5471E-01 |
| -145 | -0.2056E+01 | 0.3080E-01   | -0.6488E+00 | 0.4644E+00 | -0.1739E+01 | 0.7658E-01 |
| -140 | -0.1934E+01 | 0.4645E-01   | -0.5222E+00 | 0.4705E+00 | -0.1619E+01 | 0.1022E+00 |
| -135 | -0.1813E+01 | 0.6570E-01   | -0.3955E+00 | 0.4642E+00 | -0.1500E+01 | 0.1330E+00 |
| -130 | -0.1691E+01 | 0.9022E-01   | -0.2688E+00 | 0.4519E+00 | -0.1381E+01 | 0.1700E+00 |

V1\_Results\_baseline\_IEA.dat

|      |             |            |             |            |             |            |
|------|-------------|------------|-------------|------------|-------------|------------|
| -125 | -0.1569E+01 | 0.1184E+00 | -0.1422E+00 | 0.4336E+00 | -0.1262E+01 | 0.2112E+00 |
| -120 | -0.1448E+01 | 0.1519E+00 | -0.1550E-01 | 0.4071E+00 | -0.1142E+01 | 0.2525E+00 |
| -115 | -0.1326E+01 | 0.1875E+00 | 0.1112E+00  | 0.3746E+00 | -0.1023E+01 | 0.2910E+00 |
| -110 | -0.1204E+01 | 0.2265E+00 | 0.2378E+00  | 0.3439E+00 | -0.9036E+00 | 0.3239E+00 |
| -105 | -0.1083E+01 | 0.2645E+00 | 0.3645E+00  | 0.3154E+00 | -0.7843E+00 | 0.3517E+00 |
| -100 | -0.9610E+00 | 0.3005E+00 | 0.4912E+00  | 0.2853E+00 | -0.6650E+00 | 0.3745E+00 |
| -95  | -0.8394E+00 | 0.3333E+00 | 0.6178E+00  | 0.2519E+00 | -0.5457E+00 | 0.3896E+00 |
| -90  | -0.7177E+00 | 0.3605E+00 | 0.7445E+00  | 0.2201E+00 | -0.4264E+00 | 0.4027E+00 |
| -85  | -0.5961E+00 | 0.3806E+00 | 0.8712E+00  | 0.1923E+00 | -0.3071E+00 | 0.4130E+00 |
| -80  | -0.4744E+00 | 0.3952E+00 | 0.9979E+00  | 0.1696E+00 | -0.1878E+00 | 0.4173E+00 |
| -75  | -0.3528E+00 | 0.4056E+00 | 0.1125E+01  | 0.1492E+00 | -0.6854E-01 | 0.4088E+00 |
| -70  | -0.2312E+00 | 0.4088E+00 | 0.1251E+01  | 0.1293E+00 | 0.5076E-01  | 0.3925E+00 |
| -65  | -0.1095E+00 | 0.4059E+00 | 0.1378E+01  | 0.1102E+00 | 0.1701E+00  | 0.3741E+00 |
| -60  | 0.1214E-01  | 0.3955E+00 | 0.1505E+01  | 0.9500E-01 | 0.2894E+00  | 0.3539E+00 |
| -55  | 0.1338E+00  | 0.3805E+00 | 0.1631E+01  | 0.8192E-01 | 0.4087E+00  | 0.3304E+00 |
| -50  | 0.2554E+00  | 0.3609E+00 | 0.1758E+01  | 0.7131E-01 | 0.5280E+00  | 0.3034E+00 |
| -45  | 0.3771E+00  | 0.3389E+00 | 0.1885E+01  | 0.6247E-01 | 0.6473E+00  | 0.2773E+00 |
| -40  | 0.4987E+00  | 0.3149E+00 | 0.2011E+01  | 0.5439E-01 | 0.7666E+00  | 0.2536E+00 |
| -35  | 0.6204E+00  | 0.2906E+00 | 0.2138E+01  | 0.4638E-01 | 0.8859E+00  | 0.2290E+00 |
| -30  | 0.7420E+00  | 0.2671E+00 | 0.2265E+01  | 0.3946E-01 | 0.1005E+01  | 0.2027E+00 |
| -25  | 0.8637E+00  | 0.2394E+00 | 0.2391E+01  | 0.3417E-01 | 0.1124E+01  | 0.1790E+00 |
| -20  | 0.9853E+00  | 0.2120E+00 | 0.2518E+01  | 0.2852E-01 | 0.1244E+01  | 0.1563E+00 |
| -15  | 0.1107E+01  | 0.1852E+00 | 0.2645E+01  | 0.2332E-01 | 0.1363E+01  | 0.1360E+00 |
| -10  | 0.1229E+01  | 0.1630E+00 | 0.2771E+01  | 0.1937E-01 | 0.1482E+01  | 0.1171E+00 |
| -5   | 0.1350E+01  | 0.1408E+00 | 0.2898E+01  | 0.1697E-01 | 0.1602E+01  | 0.1009E+00 |
| 0    | 0.1472E+01  | 0.1198E+00 | 0.3025E+01  | 0.1484E-01 | 0.1721E+01  | 0.8571E-01 |
| 5    | 0.1594E+01  | 0.1003E+00 | 0.3151E+01  | 0.1274E-01 | 0.1840E+01  | 0.7126E-01 |
| 10   | 0.1715E+01  | 0.8447E-01 | 0.3278E+01  | 0.1086E-01 | 0.1960E+01  | 0.5984E-01 |
| 15   | 0.1837E+01  | 0.7177E-01 | 0.3405E+01  | 0.9359E-02 | 0.2079E+01  | 0.5122E-01 |
| 20   | 0.1958E+01  | 0.6060E-01 | 0.3531E+01  | 0.8012E-02 | 0.2198E+01  | 0.4357E-01 |
| 25   | 0.2080E+01  | 0.5077E-01 | 0.3658E+01  | 0.6851E-02 | 0.2317E+01  | 0.3503E-01 |
| 30   | 0.2202E+01  | 0.4220E-01 | 0.3785E+01  | 0.5910E-02 | 0.2437E+01  | 0.2828E-01 |
| 35   | 0.2323E+01  | 0.3524E-01 | 0.3911E+01  | 0.5136E-02 | 0.2556E+01  | 0.2368E-01 |
| 40   | 0.2445E+01  | 0.2823E-01 | 0.4038E+01  | 0.4260E-02 | 0.2675E+01  | 0.2002E-01 |
| 45   | 0.2567E+01  | 0.2283E-01 | 0.4165E+01  | 0.3573E-02 | 0.2795E+01  | 0.1611E-01 |
| 50   | 0.2688E+01  | 0.1858E-01 | 0.4291E+01  | 0.3247E-02 | 0.2914E+01  | 0.1307E-01 |

V1\_Results\_baseline\_IEA.dat

|     |            |            |            |            |            |            |
|-----|------------|------------|------------|------------|------------|------------|
| 55  | 0.2810E+01 | 0.1542E-01 | 0.4418E+01 | 0.2736E-02 | 0.3033E+01 | 0.1071E-01 |
| 60  | 0.2932E+01 | 0.1272E-01 | 0.4545E+01 | 0.2238E-02 | 0.3153E+01 | 0.8935E-02 |
| 65  | 0.3053E+01 | 0.1065E-01 | 0.4671E+01 | 0.1918E-02 | 0.3272E+01 | 0.7015E-02 |
| 70  | 0.3175E+01 | 0.8693E-02 | 0.4798E+01 | 0.1729E-02 | 0.3391E+01 | 0.5979E-02 |
| 75  | 0.3297E+01 | 0.6741E-02 | 0.4925E+01 | 0.1423E-02 | 0.3510E+01 | 0.5261E-02 |
| 80  | 0.3418E+01 | 0.5039E-02 | 0.5051E+01 | 0.1097E-02 | 0.3630E+01 | 0.4701E-02 |
| 85  | 0.3540E+01 | 0.4024E-02 | 0.5178E+01 | 0.8822E-03 | 0.3749E+01 | 0.3618E-02 |
| 90  | 0.3661E+01 | 0.3409E-02 | 0.5305E+01 | 0.7999E-03 | 0.3868E+01 | 0.2627E-02 |
| 95  | 0.3783E+01 | 0.2758E-02 | 0.5431E+01 | 0.6250E-03 | 0.3988E+01 | 0.1917E-02 |
| 100 | 0.3905E+01 | 0.1871E-02 | 0.5558E+01 | 0.4974E-03 | 0.4107E+01 | 0.1590E-02 |
| 105 | 0.4026E+01 | 0.1264E-02 | 0.5685E+01 | 0.5052E-03 | 0.4226E+01 | 0.1140E-02 |
| 110 | 0.4148E+01 | 0.1094E-02 | 0.5811E+01 | 0.6212E-03 | 0.4345E+01 | 0.7933E-03 |
| 115 | 0.4270E+01 | 0.9538E-03 | 0.5938E+01 | 0.6063E-03 | 0.4465E+01 | 0.4869E-03 |
| 120 | 0.4391E+01 | 0.8210E-03 | 0.6065E+01 | 0.5494E-03 | 0.4584E+01 | 0.4998E-03 |
| 125 | 0.4513E+01 | 0.5728E-03 | 0.6191E+01 | 0.3810E-03 | 0.4703E+01 | 0.6125E-03 |
| 130 | 0.4635E+01 | 0.3973E-03 | 0.6318E+01 | 0.2999E-03 | 0.4823E+01 | 0.5588E-03 |
| 135 | 0.4756E+01 | 0.3678E-03 | 0.6445E+01 | 0.1980E-03 | 0.4942E+01 | 0.3323E-03 |
| 140 | 0.4878E+01 | 0.3543E-03 | 0.6571E+01 | 0.1492E-03 | 0.5061E+01 | 0.1449E-03 |
| 145 | 0.5000E+01 | 0.2479E-03 | 0.6698E+01 | 0.8674E-04 | 0.5181E+01 | 0.1104E-03 |
| 150 | 0.5121E+01 | 0.1010E-03 | 0.6825E+01 | 0.1216E-03 | 0.5300E+01 | 0.1245E-03 |
| 155 | 0.5243E+01 | 0.1263E-03 | 0.6951E+01 | 0.1159E-03 | 0.5419E+01 | 0.1735E-03 |
| 160 | 0.5365E+01 | 0.1235E-03 | 0.7078E+01 | 0.1120E-03 | 0.5538E+01 | 0.1758E-03 |
| 165 | 0.5486E+01 | 0.1528E-03 | 0.7205E+01 | 0.6990E-04 | 0.5658E+01 | 0.1605E-03 |
| 170 | 0.5608E+01 | 0.1607E-03 | 0.7331E+01 | 0.7102E-04 | 0.5777E+01 | 0.1044E-03 |
| 175 | 0.5729E+01 | 0.1553E-03 | 0.7458E+01 | 0.5142E-04 | 0.5896E+01 | 0.6687E-04 |
| 180 | 0.5851E+01 | 0.6877E-04 | 0.7585E+01 | 0.7596E-04 | 0.6016E+01 | 0.4307E-04 |
| 185 | 0.5973E+01 | 0.3226E-04 | 0.7711E+01 | 0.6042E-04 | 0.6135E+01 | 0.3492E-04 |
| 190 | 0.6094E+01 | 0.7127E-04 | 0.7838E+01 | 0.2805E-04 | 0.6254E+01 | 0.5670E-04 |
| 195 | 0.6216E+01 | 0.1124E-03 | 0.7965E+01 | 0.2071E-04 | 0.6374E+01 | 0.6837E-04 |
| 200 | 0.6338E+01 | 0.9187E-04 | 0.8091E+01 | 0.3158E-04 | 0.6493E+01 | 0.5156E-04 |

```

#*****
#***  p.d.f. LCE (US$/MWh): TOTAL 2020, 2030, 2040 ,2050 (Smoothed, Not standardised) ***
#*****
#          2020          2030          2040          2050

```

V1\_Results\_baseline\_IEA.dat

| #          | *****      | NOT standardised | *****      |            |            |            |            |
|------------|------------|------------------|------------|------------|------------|------------|------------|
| -200       | 0.3905E+02 | 0.1162E-04       | 0.1323E+00 | 0.3994E-05 | 0.2543E+02 | 0.1213E-04 | 0.2335E+02 |
| 0.2363E-04 |            |                  |            |            |            |            |            |
| -195       | 0.4032E+02 | 0.2638E-04       | 0.1455E+01 | 0.1579E-05 | 0.2642E+02 | 0.1666E-04 | 0.2427E+02 |
| 0.7308E-04 |            |                  |            |            |            |            |            |
| -190       | 0.4159E+02 | 0.5030E-04       | 0.2778E+01 | 0.0000E+00 | 0.2741E+02 | 0.3412E-04 | 0.2519E+02 |
| 0.1648E-03 |            |                  |            |            |            |            |            |
| -185       | 0.4287E+02 | 0.1073E-03       | 0.4101E+01 | 0.0000E+00 | 0.2840E+02 | 0.1187E-03 | 0.2611E+02 |
| 0.3712E-03 |            |                  |            |            |            |            |            |
| -180       | 0.4414E+02 | 0.2534E-03       | 0.5424E+01 | 0.0000E+00 | 0.2938E+02 | 0.3373E-03 | 0.2703E+02 |
| 0.7539E-03 |            |                  |            |            |            |            |            |
| -175       | 0.4542E+02 | 0.5550E-03       | 0.6747E+01 | 0.0000E+00 | 0.3037E+02 | 0.7095E-03 | 0.2794E+02 |
| 0.1451E-02 |            |                  |            |            |            |            |            |
| -170       | 0.4669E+02 | 0.1011E-02       | 0.8070E+01 | 0.0000E+00 | 0.3136E+02 | 0.1453E-02 | 0.2886E+02 |
| 0.2813E-02 |            |                  |            |            |            |            |            |
| -165       | 0.4797E+02 | 0.1761E-02       | 0.9392E+01 | 0.0000E+00 | 0.3235E+02 | 0.2779E-02 | 0.2978E+02 |
| 0.4994E-02 |            |                  |            |            |            |            |            |
| -160       | 0.4924E+02 | 0.2989E-02       | 0.1072E+02 | 0.0000E+00 | 0.3334E+02 | 0.5010E-02 | 0.3070E+02 |
| 0.7921E-02 |            |                  |            |            |            |            |            |
| -155       | 0.5052E+02 | 0.4959E-02       | 0.1204E+02 | 0.0000E+00 | 0.3433E+02 | 0.7998E-02 | 0.3162E+02 |
| 0.1195E-01 |            |                  |            |            |            |            |            |
| -150       | 0.5179E+02 | 0.7458E-02       | 0.1336E+02 | 0.0000E+00 | 0.3532E+02 | 0.1178E-01 | 0.3254E+02 |
| 0.1712E-01 |            |                  |            |            |            |            |            |
| -145       | 0.5307E+02 | 0.1043E-01       | 0.1468E+02 | 0.0000E+00 | 0.3631E+02 | 0.1709E-01 | 0.3346E+02 |
| 0.2309E-01 |            |                  |            |            |            |            |            |
| -140       | 0.5434E+02 | 0.1401E-01       | 0.1601E+02 | 0.0000E+00 | 0.3730E+02 | 0.2368E-01 | 0.3438E+02 |
| 0.2953E-01 |            |                  |            |            |            |            |            |
| -135       | 0.5562E+02 | 0.1796E-01       | 0.1733E+02 | 0.0000E+00 | 0.3828E+02 | 0.3079E-01 | 0.3530E+02 |
| 0.3642E-01 |            |                  |            |            |            |            |            |
| -130       | 0.5689E+02 | 0.2216E-01       | 0.1865E+02 | 0.0000E+00 | 0.3927E+02 | 0.3747E-01 | 0.3622E+02 |
| 0.4280E-01 |            |                  |            |            |            |            |            |
| -125       | 0.5817E+02 | 0.2650E-01       | 0.1998E+02 | 0.0000E+00 | 0.4026E+02 | 0.4363E-01 | 0.3714E+02 |
| 0.4875E-01 |            |                  |            |            |            |            |            |
| -120       | 0.5944E+02 | 0.3083E-01       | 0.2130E+02 | 0.0000E+00 | 0.4125E+02 | 0.4906E-01 | 0.3806E+02 |

V1\_Results\_baseline\_IEA.dat

|            |            |            |            |            |            |            |            |
|------------|------------|------------|------------|------------|------------|------------|------------|
| 0.5379E-01 |            |            |            |            |            |            |            |
| -115       | 0.6071E+02 | 0.3482E-01 | 0.2262E+02 | 0.0000E+00 | 0.4224E+02 | 0.5374E-01 | 0.3898E+02 |
| 0.5711E-01 |            |            |            |            |            |            |            |
| -110       | 0.6199E+02 | 0.3819E-01 | 0.2394E+02 | 0.0000E+00 | 0.4323E+02 | 0.5738E-01 | 0.3990E+02 |
| 0.5929E-01 |            |            |            |            |            |            |            |
| -105       | 0.6326E+02 | 0.4071E-01 | 0.2527E+02 | 0.0000E+00 | 0.4422E+02 | 0.5950E-01 | 0.4082E+02 |
| 0.6083E-01 |            |            |            |            |            |            |            |
| -100       | 0.6454E+02 | 0.4210E-01 | 0.2659E+02 | 0.0000E+00 | 0.4521E+02 | 0.6003E-01 | 0.4174E+02 |
| 0.6120E-01 |            |            |            |            |            |            |            |
| -95        | 0.6581E+02 | 0.4283E-01 | 0.2791E+02 | 0.0000E+00 | 0.4620E+02 | 0.5936E-01 | 0.4266E+02 |
| 0.6018E-01 |            |            |            |            |            |            |            |
| -90        | 0.6709E+02 | 0.4285E-01 | 0.2924E+02 | 0.6345E-05 | 0.4719E+02 | 0.5673E-01 | 0.4358E+02 |
| 0.5806E-01 |            |            |            |            |            |            |            |
| -85        | 0.6836E+02 | 0.4189E-01 | 0.3056E+02 | 0.1394E-04 | 0.4817E+02 | 0.5337E-01 | 0.4450E+02 |
| 0.5482E-01 |            |            |            |            |            |            |            |
| -80        | 0.6964E+02 | 0.3998E-01 | 0.3188E+02 | 0.5370E-04 | 0.4916E+02 | 0.4994E-01 | 0.4542E+02 |
| 0.5066E-01 |            |            |            |            |            |            |            |
| -75        | 0.7091E+02 | 0.3784E-01 | 0.3320E+02 | 0.2070E-03 | 0.5015E+02 | 0.4638E-01 | 0.4634E+02 |
| 0.4605E-01 |            |            |            |            |            |            |            |
| -70        | 0.7219E+02 | 0.3532E-01 | 0.3453E+02 | 0.5542E-03 | 0.5114E+02 | 0.4171E-01 | 0.4726E+02 |
| 0.4183E-01 |            |            |            |            |            |            |            |
| -65        | 0.7346E+02 | 0.3236E-01 | 0.3585E+02 | 0.1337E-02 | 0.5213E+02 | 0.3683E-01 | 0.4818E+02 |
| 0.3750E-01 |            |            |            |            |            |            |            |
| -60        | 0.7474E+02 | 0.2924E-01 | 0.3717E+02 | 0.2852E-02 | 0.5312E+02 | 0.3206E-01 | 0.4910E+02 |
| 0.3304E-01 |            |            |            |            |            |            |            |
| -55        | 0.7601E+02 | 0.2621E-01 | 0.3850E+02 | 0.5302E-02 | 0.5411E+02 | 0.2786E-01 | 0.5001E+02 |
| 0.2884E-01 |            |            |            |            |            |            |            |
| -50        | 0.7728E+02 | 0.2324E-01 | 0.3982E+02 | 0.9148E-02 | 0.5510E+02 | 0.2402E-01 | 0.5093E+02 |
| 0.2544E-01 |            |            |            |            |            |            |            |
| -45        | 0.7856E+02 | 0.2048E-01 | 0.4114E+02 | 0.1444E-01 | 0.5609E+02 | 0.2060E-01 | 0.5185E+02 |
| 0.2188E-01 |            |            |            |            |            |            |            |
| -40        | 0.7983E+02 | 0.1789E-01 | 0.4246E+02 | 0.2038E-01 | 0.5707E+02 | 0.1761E-01 | 0.5277E+02 |
| 0.1844E-01 |            |            |            |            |            |            |            |
| -35        | 0.8111E+02 | 0.1566E-01 | 0.4379E+02 | 0.2710E-01 | 0.5806E+02 | 0.1499E-01 | 0.5369E+02 |
| 0.1552E-01 |            |            |            |            |            |            |            |
| -30        | 0.8238E+02 | 0.1349E-01 | 0.4511E+02 | 0.3445E-01 | 0.5905E+02 | 0.1261E-01 | 0.5461E+02 |

V1\_Results\_baseline\_IEA.dat

|            |     |            |            |            |            |            |            |            |
|------------|-----|------------|------------|------------|------------|------------|------------|------------|
| 0.1308E-01 | -25 | 0.8366E+02 | 0.1149E-01 | 0.4643E+02 | 0.4108E-01 | 0.6004E+02 | 0.1020E-01 | 0.5553E+02 |
| 0.1116E-01 | -20 | 0.8493E+02 | 0.9748E-02 | 0.4776E+02 | 0.4641E-01 | 0.6103E+02 | 0.8363E-02 | 0.5645E+02 |
| 0.9316E-02 | -15 | 0.8621E+02 | 0.8374E-02 | 0.4908E+02 | 0.5069E-01 | 0.6202E+02 | 0.6906E-02 | 0.5737E+02 |
| 0.7512E-02 | -10 | 0.8748E+02 | 0.7107E-02 | 0.5040E+02 | 0.5327E-01 | 0.6301E+02 | 0.5576E-02 | 0.5829E+02 |
| 0.6018E-02 | -5  | 0.8876E+02 | 0.5819E-02 | 0.5172E+02 | 0.5360E-01 | 0.6400E+02 | 0.4428E-02 | 0.5921E+02 |
| 0.5076E-02 | 0   | 0.9003E+02 | 0.4714E-02 | 0.5305E+02 | 0.5162E-01 | 0.6499E+02 | 0.3775E-02 | 0.6013E+02 |
| 0.4300E-02 | 5   | 0.9131E+02 | 0.3759E-02 | 0.5437E+02 | 0.4885E-01 | 0.6597E+02 | 0.3108E-02 | 0.6105E+02 |
| 0.3492E-02 | 10  | 0.9258E+02 | 0.3125E-02 | 0.5569E+02 | 0.4556E-01 | 0.6696E+02 | 0.2431E-02 | 0.6197E+02 |
| 0.2746E-02 | 15  | 0.9386E+02 | 0.2592E-02 | 0.5702E+02 | 0.4069E-01 | 0.6795E+02 | 0.1890E-02 | 0.6289E+02 |
| 0.2190E-02 | 20  | 0.9513E+02 | 0.2133E-02 | 0.5834E+02 | 0.3581E-01 | 0.6894E+02 | 0.1507E-02 | 0.6381E+02 |
| 0.1806E-02 | 25  | 0.9640E+02 | 0.1738E-02 | 0.5966E+02 | 0.3159E-01 | 0.6993E+02 | 0.1300E-02 | 0.6473E+02 |
| 0.1532E-02 | 30  | 0.9768E+02 | 0.1425E-02 | 0.6098E+02 | 0.2759E-01 | 0.7092E+02 | 0.1074E-02 | 0.6565E+02 |
| 0.1241E-02 | 35  | 0.9895E+02 | 0.1159E-02 | 0.6231E+02 | 0.2309E-01 | 0.7191E+02 | 0.8073E-03 | 0.6657E+02 |
| 0.9513E-03 | 40  | 0.1002E+03 | 0.9389E-03 | 0.6363E+02 | 0.1856E-01 | 0.7290E+02 | 0.6160E-03 | 0.6749E+02 |
| 0.8151E-03 | 45  | 0.1015E+03 | 0.7484E-03 | 0.6495E+02 | 0.1507E-01 | 0.7389E+02 | 0.5094E-03 | 0.6841E+02 |
| 0.6942E-03 | 50  | 0.1028E+03 | 0.5773E-03 | 0.6628E+02 | 0.1239E-01 | 0.7487E+02 | 0.4093E-03 | 0.6933E+02 |
| 0.5236E-03 | 55  | 0.1041E+03 | 0.4817E-03 | 0.6760E+02 | 0.9956E-02 | 0.7586E+02 | 0.2918E-03 | 0.7025E+02 |
| 0.3854E-03 | 60  | 0.1053E+03 | 0.4196E-03 | 0.6892E+02 | 0.7864E-02 | 0.7685E+02 | 0.2279E-03 | 0.7116E+02 |



V1\_Results\_baseline\_IEA.dat

|            |            |            |            |            |            |            |            |
|------------|------------|------------|------------|------------|------------|------------|------------|
| 0.3332E-03 |            |            |            |            |            |            |            |
| 65         | 0.1066E+03 | 0.3734E-03 | 0.7024E+02 | 0.6045E-02 | 0.7784E+02 | 0.1942E-03 | 0.7208E+02 |
| 0.2866E-03 |            |            |            |            |            |            |            |
| 70         | 0.1079E+03 | 0.3142E-03 | 0.7157E+02 | 0.4695E-02 | 0.7883E+02 | 0.1528E-03 | 0.7300E+02 |
| 0.2419E-03 |            |            |            |            |            |            |            |
| 75         | 0.1092E+03 | 0.2580E-03 | 0.7289E+02 | 0.3716E-02 | 0.7982E+02 | 0.1061E-03 | 0.7392E+02 |
| 0.1763E-03 |            |            |            |            |            |            |            |
| 80         | 0.1104E+03 | 0.1844E-03 | 0.7421E+02 | 0.2769E-02 | 0.8081E+02 | 0.8741E-04 | 0.7484E+02 |
| 0.1410E-03 |            |            |            |            |            |            |            |
| 85         | 0.1117E+03 | 0.1423E-03 | 0.7554E+02 | 0.2120E-02 | 0.8180E+02 | 0.8671E-04 | 0.7576E+02 |
| 0.1231E-03 |            |            |            |            |            |            |            |
| 90         | 0.1130E+03 | 0.1288E-03 | 0.7686E+02 | 0.1789E-02 | 0.8279E+02 | 0.7469E-04 | 0.7668E+02 |
| 0.1081E-03 |            |            |            |            |            |            |            |
| 95         | 0.1142E+03 | 0.1140E-03 | 0.7818E+02 | 0.1320E-02 | 0.8377E+02 | 0.5191E-04 | 0.7760E+02 |
| 0.7838E-04 |            |            |            |            |            |            |            |
| 100        | 0.1155E+03 | 0.7417E-04 | 0.7951E+02 | 0.8997E-03 | 0.8476E+02 | 0.4030E-04 | 0.7852E+02 |
| 0.6136E-04 |            |            |            |            |            |            |            |
| 105        | 0.1168E+03 | 0.4934E-04 | 0.8083E+02 | 0.7001E-03 | 0.8575E+02 | 0.4541E-04 | 0.7944E+02 |
| 0.5206E-04 |            |            |            |            |            |            |            |
| 110        | 0.1181E+03 | 0.5368E-04 | 0.8215E+02 | 0.5551E-03 | 0.8674E+02 | 0.3960E-04 | 0.8036E+02 |
| 0.4453E-04 |            |            |            |            |            |            |            |
| 115        | 0.1193E+03 | 0.5538E-04 | 0.8347E+02 | 0.4498E-03 | 0.8773E+02 | 0.2746E-04 | 0.8128E+02 |
| 0.3392E-04 |            |            |            |            |            |            |            |
| 120        | 0.1206E+03 | 0.4520E-04 | 0.8480E+02 | 0.3176E-03 | 0.8872E+02 | 0.3121E-04 | 0.8220E+02 |
| 0.2822E-04 |            |            |            |            |            |            |            |
| 125        | 0.1219E+03 | 0.2967E-04 | 0.8612E+02 | 0.2389E-03 | 0.8971E+02 | 0.2746E-04 | 0.8312E+02 |
| 0.3663E-04 |            |            |            |            |            |            |            |
| 130        | 0.1232E+03 | 0.2878E-04 | 0.8744E+02 | 0.2062E-03 | 0.9070E+02 | 0.2238E-04 | 0.8404E+02 |
| 0.3679E-04 |            |            |            |            |            |            |            |
| 135        | 0.1244E+03 | 0.3213E-04 | 0.8877E+02 | 0.1675E-03 | 0.9169E+02 | 0.1626E-04 | 0.8496E+02 |
| 0.2695E-04 |            |            |            |            |            |            |            |
| 140        | 0.1257E+03 | 0.3075E-04 | 0.9009E+02 | 0.1179E-03 | 0.9268E+02 | 0.7868E-05 | 0.8588E+02 |
| 0.1443E-04 |            |            |            |            |            |            |            |
| 145        | 0.1270E+03 | 0.2186E-04 | 0.9141E+02 | 0.6334E-04 | 0.9366E+02 | 0.8113E-05 | 0.8680E+02 |
| 0.5570E-05 |            |            |            |            |            |            |            |
| 150        | 0.1283E+03 | 0.1365E-04 | 0.9273E+02 | 0.4650E-04 | 0.9465E+02 | 0.7188E-05 | 0.8772E+02 |

# V1\_Results\_baseline\_IEA.dat

```

0.1751E-05
 155  0.1295E+03  0.7433E-05  0.9406E+02  0.3120E-04  0.9564E+02  0.5624E-05  0.8864E+02
0.4451E-05
 160  0.1308E+03  0.5058E-05  0.9538E+02  0.2884E-04  0.9663E+02  0.4352E-05  0.8956E+02
0.1838E-04
 165  0.1321E+03  0.6038E-05  0.9670E+02  0.2381E-04  0.9762E+02  0.1936E-05  0.9048E+02
0.2521E-04
 170  0.1334E+03  0.7800E-05  0.9803E+02  0.1614E-04  0.9861E+02  0.0000E+00  0.9140E+02
0.1794E-04
 175  0.1346E+03  0.9623E-05  0.9935E+02  0.9988E-05  0.9960E+02  0.0000E+00  0.9232E+02
0.7989E-05
 180  0.1359E+03  0.9168E-05  0.1007E+03  0.1216E-04  0.1006E+03  0.0000E+00  0.9323E+02
0.2946E-05
 185  0.1372E+03  0.6874E-05  0.1020E+03  0.1504E-04  0.1016E+03  0.0000E+00  0.9415E+02
0.2351E-05
 190  0.1385E+03  0.4445E-05  0.1033E+03  0.6079E-05  0.1026E+03  0.0000E+00  0.9507E+02
0.4502E-05
 195  0.1397E+03  0.6752E-05  0.1046E+03  0.5488E-05  0.1036E+03  0.2591E-05  0.9599E+02
0.6583E-05
 200  0.1410E+03  0.6061E-05  0.1060E+03  0.6813E-05  0.1045E+03  0.4456E-05  0.9691E+02
0.4672E-05

```

#       \*\*\*\*\*       adaptados para un plot en 3D con gnuplot       \*\*\*\*\*

```

0.3905E+02  0.1162E-04  0.2020E+04  0xff0000
0.4032E+02  0.2638E-04  0.2020E+04  0xff0000
0.4159E+02  0.5030E-04  0.2020E+04  0xff0000
0.4287E+02  0.1073E-03  0.2020E+04  0xff0000
0.4414E+02  0.2534E-03  0.2020E+04  0xff0000
0.4542E+02  0.5550E-03  0.2020E+04  0xff0000
0.4669E+02  0.1011E-02  0.2020E+04  0xff0000
0.4797E+02  0.1761E-02  0.2020E+04  0xff0000
0.4924E+02  0.2989E-02  0.2020E+04  0xff0000
0.5052E+02  0.4959E-02  0.2020E+04  0xff0000
0.5179E+02  0.7458E-02  0.2020E+04  0xff0000
0.5307E+02  0.1043E-01  0.2020E+04  0xff0000

```

V1\_Results\_baseline\_IEA.dat

|            |            |            |          |
|------------|------------|------------|----------|
| 0.5434E+02 | 0.1401E-01 | 0.2020E+04 | 0xff0000 |
| 0.5562E+02 | 0.1796E-01 | 0.2020E+04 | 0xff0000 |
| 0.5689E+02 | 0.2216E-01 | 0.2020E+04 | 0xff0000 |
| 0.5817E+02 | 0.2650E-01 | 0.2020E+04 | 0xff0000 |
| 0.5944E+02 | 0.3083E-01 | 0.2020E+04 | 0xff0000 |
| 0.6071E+02 | 0.3482E-01 | 0.2020E+04 | 0xff0000 |
| 0.6199E+02 | 0.3819E-01 | 0.2020E+04 | 0xff0000 |
| 0.6326E+02 | 0.4071E-01 | 0.2020E+04 | 0xff0000 |
| 0.6454E+02 | 0.4210E-01 | 0.2020E+04 | 0xff0000 |
| 0.6581E+02 | 0.4283E-01 | 0.2020E+04 | 0xff0000 |
| 0.6709E+02 | 0.4285E-01 | 0.2020E+04 | 0xff0000 |
| 0.6836E+02 | 0.4189E-01 | 0.2020E+04 | 0xff0000 |
| 0.6964E+02 | 0.3998E-01 | 0.2020E+04 | 0xff0000 |
| 0.7091E+02 | 0.3784E-01 | 0.2020E+04 | 0xff0000 |
| 0.7219E+02 | 0.3532E-01 | 0.2020E+04 | 0xff0000 |
| 0.7346E+02 | 0.3236E-01 | 0.2020E+04 | 0xff0000 |
| 0.7474E+02 | 0.2924E-01 | 0.2020E+04 | 0xff0000 |
| 0.7601E+02 | 0.2621E-01 | 0.2020E+04 | 0xff0000 |
| 0.7728E+02 | 0.2324E-01 | 0.2020E+04 | 0xff0000 |
| 0.7856E+02 | 0.2048E-01 | 0.2020E+04 | 0xff0000 |
| 0.7983E+02 | 0.1789E-01 | 0.2020E+04 | 0xff0000 |
| 0.8111E+02 | 0.1566E-01 | 0.2020E+04 | 0xff0000 |
| 0.8238E+02 | 0.1349E-01 | 0.2020E+04 | 0xff0000 |
| 0.8366E+02 | 0.1149E-01 | 0.2020E+04 | 0xff0000 |
| 0.8493E+02 | 0.9748E-02 | 0.2020E+04 | 0xff0000 |
| 0.8621E+02 | 0.8374E-02 | 0.2020E+04 | 0xff0000 |
| 0.8748E+02 | 0.7107E-02 | 0.2020E+04 | 0xff0000 |
| 0.8876E+02 | 0.5819E-02 | 0.2020E+04 | 0xff0000 |
| 0.9003E+02 | 0.4714E-02 | 0.2020E+04 | 0xff0000 |
| 0.9131E+02 | 0.3759E-02 | 0.2020E+04 | 0xff0000 |
| 0.9258E+02 | 0.3125E-02 | 0.2020E+04 | 0xff0000 |
| 0.9386E+02 | 0.2592E-02 | 0.2020E+04 | 0xff0000 |
| 0.9513E+02 | 0.2133E-02 | 0.2020E+04 | 0xff0000 |
| 0.9640E+02 | 0.1738E-02 | 0.2020E+04 | 0xff0000 |
| 0.9768E+02 | 0.1425E-02 | 0.2020E+04 | 0xff0000 |
| 0.9895E+02 | 0.1159E-02 | 0.2020E+04 | 0xff0000 |

V1\_Results\_baseline\_IEA.dat

|            |            |            |          |
|------------|------------|------------|----------|
| 0.1002E+03 | 0.9389E-03 | 0.2020E+04 | 0xff0000 |
| 0.1015E+03 | 0.7484E-03 | 0.2020E+04 | 0xff0000 |
| 0.1028E+03 | 0.5773E-03 | 0.2020E+04 | 0xff0000 |
| 0.1041E+03 | 0.4817E-03 | 0.2020E+04 | 0xff0000 |
| 0.1053E+03 | 0.4196E-03 | 0.2020E+04 | 0xff0000 |
| 0.1066E+03 | 0.3734E-03 | 0.2020E+04 | 0xff0000 |
| 0.1079E+03 | 0.3142E-03 | 0.2020E+04 | 0xff0000 |
| 0.1092E+03 | 0.2580E-03 | 0.2020E+04 | 0xff0000 |
| 0.1104E+03 | 0.1844E-03 | 0.2020E+04 | 0xff0000 |
| 0.1117E+03 | 0.1423E-03 | 0.2020E+04 | 0xff0000 |
| 0.1130E+03 | 0.1288E-03 | 0.2020E+04 | 0xff0000 |
| 0.1142E+03 | 0.1140E-03 | 0.2020E+04 | 0xff0000 |
| 0.1155E+03 | 0.7417E-04 | 0.2020E+04 | 0xff0000 |
| 0.1168E+03 | 0.4934E-04 | 0.2020E+04 | 0xff0000 |
| 0.1181E+03 | 0.5368E-04 | 0.2020E+04 | 0xff0000 |
| 0.1193E+03 | 0.5538E-04 | 0.2020E+04 | 0xff0000 |
| 0.1206E+03 | 0.4520E-04 | 0.2020E+04 | 0xff0000 |
| 0.1219E+03 | 0.2967E-04 | 0.2020E+04 | 0xff0000 |
| 0.1232E+03 | 0.2878E-04 | 0.2020E+04 | 0xff0000 |
| 0.1244E+03 | 0.3213E-04 | 0.2020E+04 | 0xff0000 |
| 0.1257E+03 | 0.3075E-04 | 0.2020E+04 | 0xff0000 |
| 0.1270E+03 | 0.2186E-04 | 0.2020E+04 | 0xff0000 |
| 0.1283E+03 | 0.1365E-04 | 0.2020E+04 | 0xff0000 |
| 0.1295E+03 | 0.7433E-05 | 0.2020E+04 | 0xff0000 |
| 0.1308E+03 | 0.5058E-05 | 0.2020E+04 | 0xff0000 |
| 0.1321E+03 | 0.6038E-05 | 0.2020E+04 | 0xff0000 |
| 0.1334E+03 | 0.7800E-05 | 0.2020E+04 | 0xff0000 |
| 0.1346E+03 | 0.9623E-05 | 0.2020E+04 | 0xff0000 |
| 0.1359E+03 | 0.9168E-05 | 0.2020E+04 | 0xff0000 |
| 0.1372E+03 | 0.6874E-05 | 0.2020E+04 | 0xff0000 |
| 0.1385E+03 | 0.4445E-05 | 0.2020E+04 | 0xff0000 |
| 0.1397E+03 | 0.6752E-05 | 0.2020E+04 | 0xff0000 |
| 0.1410E+03 | 0.6061E-05 | 0.2020E+04 | 0xff0000 |
| 0.1323E+00 | 0.3994E-05 | 0.2030E+04 | 0xffff00 |
| 0.1455E+01 | 0.1579E-05 | 0.2030E+04 | 0xffff00 |

V1\_Results\_baseline\_IEA.dat

|            |            |            |           |
|------------|------------|------------|-----------|
| 0.2778E+01 | 0.0000E+00 | 0.2030E+04 | 0xfffff00 |
| 0.4101E+01 | 0.0000E+00 | 0.2030E+04 | 0xfffff00 |
| 0.5424E+01 | 0.0000E+00 | 0.2030E+04 | 0xfffff00 |
| 0.6747E+01 | 0.0000E+00 | 0.2030E+04 | 0xfffff00 |
| 0.8070E+01 | 0.0000E+00 | 0.2030E+04 | 0xfffff00 |
| 0.9392E+01 | 0.0000E+00 | 0.2030E+04 | 0xfffff00 |
| 0.1072E+02 | 0.0000E+00 | 0.2030E+04 | 0xfffff00 |
| 0.1204E+02 | 0.0000E+00 | 0.2030E+04 | 0xfffff00 |
| 0.1336E+02 | 0.0000E+00 | 0.2030E+04 | 0xfffff00 |
| 0.1468E+02 | 0.0000E+00 | 0.2030E+04 | 0xfffff00 |
| 0.1601E+02 | 0.0000E+00 | 0.2030E+04 | 0xfffff00 |
| 0.1733E+02 | 0.0000E+00 | 0.2030E+04 | 0xfffff00 |
| 0.1865E+02 | 0.0000E+00 | 0.2030E+04 | 0xfffff00 |
| 0.1998E+02 | 0.0000E+00 | 0.2030E+04 | 0xfffff00 |
| 0.2130E+02 | 0.0000E+00 | 0.2030E+04 | 0xfffff00 |
| 0.2262E+02 | 0.0000E+00 | 0.2030E+04 | 0xfffff00 |
| 0.2394E+02 | 0.0000E+00 | 0.2030E+04 | 0xfffff00 |
| 0.2527E+02 | 0.0000E+00 | 0.2030E+04 | 0xfffff00 |
| 0.2659E+02 | 0.0000E+00 | 0.2030E+04 | 0xfffff00 |
| 0.2791E+02 | 0.0000E+00 | 0.2030E+04 | 0xfffff00 |
| 0.2924E+02 | 0.6345E-05 | 0.2030E+04 | 0xfffff00 |
| 0.3056E+02 | 0.1394E-04 | 0.2030E+04 | 0xfffff00 |
| 0.3188E+02 | 0.5370E-04 | 0.2030E+04 | 0xfffff00 |
| 0.3320E+02 | 0.2070E-03 | 0.2030E+04 | 0xfffff00 |
| 0.3453E+02 | 0.5542E-03 | 0.2030E+04 | 0xfffff00 |
| 0.3585E+02 | 0.1337E-02 | 0.2030E+04 | 0xfffff00 |
| 0.3717E+02 | 0.2852E-02 | 0.2030E+04 | 0xfffff00 |
| 0.3850E+02 | 0.5302E-02 | 0.2030E+04 | 0xfffff00 |
| 0.3982E+02 | 0.9148E-02 | 0.2030E+04 | 0xfffff00 |
| 0.4114E+02 | 0.1444E-01 | 0.2030E+04 | 0xfffff00 |
| 0.4246E+02 | 0.2038E-01 | 0.2030E+04 | 0xfffff00 |
| 0.4379E+02 | 0.2710E-01 | 0.2030E+04 | 0xfffff00 |
| 0.4511E+02 | 0.3445E-01 | 0.2030E+04 | 0xfffff00 |
| 0.4643E+02 | 0.4108E-01 | 0.2030E+04 | 0xfffff00 |
| 0.4776E+02 | 0.4641E-01 | 0.2030E+04 | 0xfffff00 |
| 0.4908E+02 | 0.5069E-01 | 0.2030E+04 | 0xfffff00 |

V1\_Results\_baseline\_IEA.dat

|            |            |            |           |
|------------|------------|------------|-----------|
| 0.5040E+02 | 0.5327E-01 | 0.2030E+04 | 0xfffff00 |
| 0.5172E+02 | 0.5360E-01 | 0.2030E+04 | 0xfffff00 |
| 0.5305E+02 | 0.5162E-01 | 0.2030E+04 | 0xfffff00 |
| 0.5437E+02 | 0.4885E-01 | 0.2030E+04 | 0xfffff00 |
| 0.5569E+02 | 0.4556E-01 | 0.2030E+04 | 0xfffff00 |
| 0.5702E+02 | 0.4069E-01 | 0.2030E+04 | 0xfffff00 |
| 0.5834E+02 | 0.3581E-01 | 0.2030E+04 | 0xfffff00 |
| 0.5966E+02 | 0.3159E-01 | 0.2030E+04 | 0xfffff00 |
| 0.6098E+02 | 0.2759E-01 | 0.2030E+04 | 0xfffff00 |
| 0.6231E+02 | 0.2309E-01 | 0.2030E+04 | 0xfffff00 |
| 0.6363E+02 | 0.1856E-01 | 0.2030E+04 | 0xfffff00 |
| 0.6495E+02 | 0.1507E-01 | 0.2030E+04 | 0xfffff00 |
| 0.6628E+02 | 0.1239E-01 | 0.2030E+04 | 0xfffff00 |
| 0.6760E+02 | 0.9956E-02 | 0.2030E+04 | 0xfffff00 |
| 0.6892E+02 | 0.7864E-02 | 0.2030E+04 | 0xfffff00 |
| 0.7024E+02 | 0.6045E-02 | 0.2030E+04 | 0xfffff00 |
| 0.7157E+02 | 0.4695E-02 | 0.2030E+04 | 0xfffff00 |
| 0.7289E+02 | 0.3716E-02 | 0.2030E+04 | 0xfffff00 |
| 0.7421E+02 | 0.2769E-02 | 0.2030E+04 | 0xfffff00 |
| 0.7554E+02 | 0.2120E-02 | 0.2030E+04 | 0xfffff00 |
| 0.7686E+02 | 0.1789E-02 | 0.2030E+04 | 0xfffff00 |
| 0.7818E+02 | 0.1320E-02 | 0.2030E+04 | 0xfffff00 |
| 0.7951E+02 | 0.8997E-03 | 0.2030E+04 | 0xfffff00 |
| 0.8083E+02 | 0.7001E-03 | 0.2030E+04 | 0xfffff00 |
| 0.8215E+02 | 0.5551E-03 | 0.2030E+04 | 0xfffff00 |
| 0.8347E+02 | 0.4498E-03 | 0.2030E+04 | 0xfffff00 |
| 0.8480E+02 | 0.3176E-03 | 0.2030E+04 | 0xfffff00 |
| 0.8612E+02 | 0.2389E-03 | 0.2030E+04 | 0xfffff00 |
| 0.8744E+02 | 0.2062E-03 | 0.2030E+04 | 0xfffff00 |
| 0.8877E+02 | 0.1675E-03 | 0.2030E+04 | 0xfffff00 |
| 0.9009E+02 | 0.1179E-03 | 0.2030E+04 | 0xfffff00 |
| 0.9141E+02 | 0.6334E-04 | 0.2030E+04 | 0xfffff00 |
| 0.9273E+02 | 0.4650E-04 | 0.2030E+04 | 0xfffff00 |
| 0.9406E+02 | 0.3120E-04 | 0.2030E+04 | 0xfffff00 |
| 0.9538E+02 | 0.2884E-04 | 0.2030E+04 | 0xfffff00 |
| 0.9670E+02 | 0.2381E-04 | 0.2030E+04 | 0xfffff00 |

V1\_Results\_baseline\_IEA.dat

|            |            |            |          |
|------------|------------|------------|----------|
| 0.9803E+02 | 0.1614E-04 | 0.2030E+04 | 0xffff00 |
| 0.9935E+02 | 0.9988E-05 | 0.2030E+04 | 0xffff00 |
| 0.1007E+03 | 0.1216E-04 | 0.2030E+04 | 0xffff00 |
| 0.1020E+03 | 0.1504E-04 | 0.2030E+04 | 0xffff00 |
| 0.1033E+03 | 0.6079E-05 | 0.2030E+04 | 0xffff00 |
| 0.1046E+03 | 0.5488E-05 | 0.2030E+04 | 0xffff00 |
| 0.1060E+03 | 0.6813E-05 | 0.2030E+04 | 0xffff00 |

|            |            |            |          |
|------------|------------|------------|----------|
| 0.2543E+02 | 0.1213E-04 | 0.2040E+04 | 0x00ffff |
| 0.2642E+02 | 0.1666E-04 | 0.2040E+04 | 0x00ffff |
| 0.2741E+02 | 0.3412E-04 | 0.2040E+04 | 0x00ffff |
| 0.2840E+02 | 0.1187E-03 | 0.2040E+04 | 0x00ffff |
| 0.2938E+02 | 0.3373E-03 | 0.2040E+04 | 0x00ffff |
| 0.3037E+02 | 0.7095E-03 | 0.2040E+04 | 0x00ffff |
| 0.3136E+02 | 0.1453E-02 | 0.2040E+04 | 0x00ffff |
| 0.3235E+02 | 0.2779E-02 | 0.2040E+04 | 0x00ffff |
| 0.3334E+02 | 0.5010E-02 | 0.2040E+04 | 0x00ffff |
| 0.3433E+02 | 0.7998E-02 | 0.2040E+04 | 0x00ffff |
| 0.3532E+02 | 0.1178E-01 | 0.2040E+04 | 0x00ffff |
| 0.3631E+02 | 0.1709E-01 | 0.2040E+04 | 0x00ffff |
| 0.3730E+02 | 0.2368E-01 | 0.2040E+04 | 0x00ffff |
| 0.3828E+02 | 0.3079E-01 | 0.2040E+04 | 0x00ffff |
| 0.3927E+02 | 0.3747E-01 | 0.2040E+04 | 0x00ffff |
| 0.4026E+02 | 0.4363E-01 | 0.2040E+04 | 0x00ffff |
| 0.4125E+02 | 0.4906E-01 | 0.2040E+04 | 0x00ffff |
| 0.4224E+02 | 0.5374E-01 | 0.2040E+04 | 0x00ffff |
| 0.4323E+02 | 0.5738E-01 | 0.2040E+04 | 0x00ffff |
| 0.4422E+02 | 0.5950E-01 | 0.2040E+04 | 0x00ffff |
| 0.4521E+02 | 0.6003E-01 | 0.2040E+04 | 0x00ffff |
| 0.4620E+02 | 0.5936E-01 | 0.2040E+04 | 0x00ffff |
| 0.4719E+02 | 0.5673E-01 | 0.2040E+04 | 0x00ffff |
| 0.4817E+02 | 0.5337E-01 | 0.2040E+04 | 0x00ffff |
| 0.4916E+02 | 0.4994E-01 | 0.2040E+04 | 0x00ffff |
| 0.5015E+02 | 0.4638E-01 | 0.2040E+04 | 0x00ffff |
| 0.5114E+02 | 0.4171E-01 | 0.2040E+04 | 0x00ffff |
| 0.5213E+02 | 0.3683E-01 | 0.2040E+04 | 0x00ffff |

V1\_Results\_baseline\_IEA.dat

|            |            |            |          |
|------------|------------|------------|----------|
| 0.5312E+02 | 0.3206E-01 | 0.2040E+04 | 0x00ffff |
| 0.5411E+02 | 0.2786E-01 | 0.2040E+04 | 0x00ffff |
| 0.5510E+02 | 0.2402E-01 | 0.2040E+04 | 0x00ffff |
| 0.5609E+02 | 0.2060E-01 | 0.2040E+04 | 0x00ffff |
| 0.5707E+02 | 0.1761E-01 | 0.2040E+04 | 0x00ffff |
| 0.5806E+02 | 0.1499E-01 | 0.2040E+04 | 0x00ffff |
| 0.5905E+02 | 0.1261E-01 | 0.2040E+04 | 0x00ffff |
| 0.6004E+02 | 0.1020E-01 | 0.2040E+04 | 0x00ffff |
| 0.6103E+02 | 0.8363E-02 | 0.2040E+04 | 0x00ffff |
| 0.6202E+02 | 0.6906E-02 | 0.2040E+04 | 0x00ffff |
| 0.6301E+02 | 0.5576E-02 | 0.2040E+04 | 0x00ffff |
| 0.6400E+02 | 0.4428E-02 | 0.2040E+04 | 0x00ffff |
| 0.6499E+02 | 0.3775E-02 | 0.2040E+04 | 0x00ffff |
| 0.6597E+02 | 0.3108E-02 | 0.2040E+04 | 0x00ffff |
| 0.6696E+02 | 0.2431E-02 | 0.2040E+04 | 0x00ffff |
| 0.6795E+02 | 0.1890E-02 | 0.2040E+04 | 0x00ffff |
| 0.6894E+02 | 0.1507E-02 | 0.2040E+04 | 0x00ffff |
| 0.6993E+02 | 0.1300E-02 | 0.2040E+04 | 0x00ffff |
| 0.7092E+02 | 0.1074E-02 | 0.2040E+04 | 0x00ffff |
| 0.7191E+02 | 0.8073E-03 | 0.2040E+04 | 0x00ffff |
| 0.7290E+02 | 0.6160E-03 | 0.2040E+04 | 0x00ffff |
| 0.7389E+02 | 0.5094E-03 | 0.2040E+04 | 0x00ffff |
| 0.7487E+02 | 0.4093E-03 | 0.2040E+04 | 0x00ffff |
| 0.7586E+02 | 0.2918E-03 | 0.2040E+04 | 0x00ffff |
| 0.7685E+02 | 0.2279E-03 | 0.2040E+04 | 0x00ffff |
| 0.7784E+02 | 0.1942E-03 | 0.2040E+04 | 0x00ffff |
| 0.7883E+02 | 0.1528E-03 | 0.2040E+04 | 0x00ffff |
| 0.7982E+02 | 0.1061E-03 | 0.2040E+04 | 0x00ffff |
| 0.8081E+02 | 0.8741E-04 | 0.2040E+04 | 0x00ffff |
| 0.8180E+02 | 0.8671E-04 | 0.2040E+04 | 0x00ffff |
| 0.8279E+02 | 0.7469E-04 | 0.2040E+04 | 0x00ffff |
| 0.8377E+02 | 0.5191E-04 | 0.2040E+04 | 0x00ffff |
| 0.8476E+02 | 0.4030E-04 | 0.2040E+04 | 0x00ffff |
| 0.8575E+02 | 0.4541E-04 | 0.2040E+04 | 0x00ffff |
| 0.8674E+02 | 0.3960E-04 | 0.2040E+04 | 0x00ffff |
| 0.8773E+02 | 0.2746E-04 | 0.2040E+04 | 0x00ffff |



V1\_Results\_baseline\_IEA.dat

|            |            |            |          |
|------------|------------|------------|----------|
| 0.8872E+02 | 0.3121E-04 | 0.2040E+04 | 0x00ffff |
| 0.8971E+02 | 0.2746E-04 | 0.2040E+04 | 0x00ffff |
| 0.9070E+02 | 0.2238E-04 | 0.2040E+04 | 0x00ffff |
| 0.9169E+02 | 0.1626E-04 | 0.2040E+04 | 0x00ffff |
| 0.9268E+02 | 0.7868E-05 | 0.2040E+04 | 0x00ffff |
| 0.9366E+02 | 0.8113E-05 | 0.2040E+04 | 0x00ffff |
| 0.9465E+02 | 0.7188E-05 | 0.2040E+04 | 0x00ffff |
| 0.9564E+02 | 0.5624E-05 | 0.2040E+04 | 0x00ffff |
| 0.9663E+02 | 0.4352E-05 | 0.2040E+04 | 0x00ffff |
| 0.9762E+02 | 0.1936E-05 | 0.2040E+04 | 0x00ffff |
| 0.9861E+02 | 0.0000E+00 | 0.2040E+04 | 0x00ffff |
| 0.9960E+02 | 0.0000E+00 | 0.2040E+04 | 0x00ffff |
| 0.1006E+03 | 0.0000E+00 | 0.2040E+04 | 0x00ffff |
| 0.1016E+03 | 0.0000E+00 | 0.2040E+04 | 0x00ffff |
| 0.1026E+03 | 0.0000E+00 | 0.2040E+04 | 0x00ffff |
| 0.1036E+03 | 0.2591E-05 | 0.2040E+04 | 0x00ffff |
| 0.1045E+03 | 0.4456E-05 | 0.2040E+04 | 0x00ffff |
|            |            |            |          |
| 0.2335E+02 | 0.2363E-04 | 0.2050E+04 | 0x0000ff |
| 0.2427E+02 | 0.7308E-04 | 0.2050E+04 | 0x0000ff |
| 0.2519E+02 | 0.1648E-03 | 0.2050E+04 | 0x0000ff |
| 0.2611E+02 | 0.3712E-03 | 0.2050E+04 | 0x0000ff |
| 0.2703E+02 | 0.7539E-03 | 0.2050E+04 | 0x0000ff |
| 0.2794E+02 | 0.1451E-02 | 0.2050E+04 | 0x0000ff |
| 0.2886E+02 | 0.2813E-02 | 0.2050E+04 | 0x0000ff |
| 0.2978E+02 | 0.4994E-02 | 0.2050E+04 | 0x0000ff |
| 0.3070E+02 | 0.7921E-02 | 0.2050E+04 | 0x0000ff |
| 0.3162E+02 | 0.1195E-01 | 0.2050E+04 | 0x0000ff |
| 0.3254E+02 | 0.1712E-01 | 0.2050E+04 | 0x0000ff |
| 0.3346E+02 | 0.2309E-01 | 0.2050E+04 | 0x0000ff |
| 0.3438E+02 | 0.2953E-01 | 0.2050E+04 | 0x0000ff |
| 0.3530E+02 | 0.3642E-01 | 0.2050E+04 | 0x0000ff |
| 0.3622E+02 | 0.4280E-01 | 0.2050E+04 | 0x0000ff |
| 0.3714E+02 | 0.4875E-01 | 0.2050E+04 | 0x0000ff |
| 0.3806E+02 | 0.5379E-01 | 0.2050E+04 | 0x0000ff |
| 0.3898E+02 | 0.5711E-01 | 0.2050E+04 | 0x0000ff |

V1\_Results\_baseline\_IEA.dat

|            |            |            |          |
|------------|------------|------------|----------|
| 0.3990E+02 | 0.5929E-01 | 0.2050E+04 | 0x0000ff |
| 0.4082E+02 | 0.6083E-01 | 0.2050E+04 | 0x0000ff |
| 0.4174E+02 | 0.6120E-01 | 0.2050E+04 | 0x0000ff |
| 0.4266E+02 | 0.6018E-01 | 0.2050E+04 | 0x0000ff |
| 0.4358E+02 | 0.5806E-01 | 0.2050E+04 | 0x0000ff |
| 0.4450E+02 | 0.5482E-01 | 0.2050E+04 | 0x0000ff |
| 0.4542E+02 | 0.5066E-01 | 0.2050E+04 | 0x0000ff |
| 0.4634E+02 | 0.4605E-01 | 0.2050E+04 | 0x0000ff |
| 0.4726E+02 | 0.4183E-01 | 0.2050E+04 | 0x0000ff |
| 0.4818E+02 | 0.3750E-01 | 0.2050E+04 | 0x0000ff |
| 0.4910E+02 | 0.3304E-01 | 0.2050E+04 | 0x0000ff |
| 0.5001E+02 | 0.2884E-01 | 0.2050E+04 | 0x0000ff |
| 0.5093E+02 | 0.2544E-01 | 0.2050E+04 | 0x0000ff |
| 0.5185E+02 | 0.2188E-01 | 0.2050E+04 | 0x0000ff |
| 0.5277E+02 | 0.1844E-01 | 0.2050E+04 | 0x0000ff |
| 0.5369E+02 | 0.1552E-01 | 0.2050E+04 | 0x0000ff |
| 0.5461E+02 | 0.1308E-01 | 0.2050E+04 | 0x0000ff |
| 0.5553E+02 | 0.1116E-01 | 0.2050E+04 | 0x0000ff |
| 0.5645E+02 | 0.9316E-02 | 0.2050E+04 | 0x0000ff |
| 0.5737E+02 | 0.7512E-02 | 0.2050E+04 | 0x0000ff |
| 0.5829E+02 | 0.6018E-02 | 0.2050E+04 | 0x0000ff |
| 0.5921E+02 | 0.5076E-02 | 0.2050E+04 | 0x0000ff |
| 0.6013E+02 | 0.4300E-02 | 0.2050E+04 | 0x0000ff |
| 0.6105E+02 | 0.3492E-02 | 0.2050E+04 | 0x0000ff |
| 0.6197E+02 | 0.2746E-02 | 0.2050E+04 | 0x0000ff |
| 0.6289E+02 | 0.2190E-02 | 0.2050E+04 | 0x0000ff |
| 0.6381E+02 | 0.1806E-02 | 0.2050E+04 | 0x0000ff |
| 0.6473E+02 | 0.1532E-02 | 0.2050E+04 | 0x0000ff |
| 0.6565E+02 | 0.1241E-02 | 0.2050E+04 | 0x0000ff |
| 0.6657E+02 | 0.9513E-03 | 0.2050E+04 | 0x0000ff |
| 0.6749E+02 | 0.8151E-03 | 0.2050E+04 | 0x0000ff |
| 0.6841E+02 | 0.6942E-03 | 0.2050E+04 | 0x0000ff |
| 0.6933E+02 | 0.5236E-03 | 0.2050E+04 | 0x0000ff |
| 0.7025E+02 | 0.3854E-03 | 0.2050E+04 | 0x0000ff |
| 0.7116E+02 | 0.3332E-03 | 0.2050E+04 | 0x0000ff |
| 0.7208E+02 | 0.2866E-03 | 0.2050E+04 | 0x0000ff |

V1\_Results\_baseline\_IEA.dat

|            |            |            |          |
|------------|------------|------------|----------|
| 0.7300E+02 | 0.2419E-03 | 0.2050E+04 | 0x0000ff |
| 0.7392E+02 | 0.1763E-03 | 0.2050E+04 | 0x0000ff |
| 0.7484E+02 | 0.1410E-03 | 0.2050E+04 | 0x0000ff |
| 0.7576E+02 | 0.1231E-03 | 0.2050E+04 | 0x0000ff |
| 0.7668E+02 | 0.1081E-03 | 0.2050E+04 | 0x0000ff |
| 0.7760E+02 | 0.7838E-04 | 0.2050E+04 | 0x0000ff |
| 0.7852E+02 | 0.6136E-04 | 0.2050E+04 | 0x0000ff |
| 0.7944E+02 | 0.5206E-04 | 0.2050E+04 | 0x0000ff |
| 0.8036E+02 | 0.4453E-04 | 0.2050E+04 | 0x0000ff |
| 0.8128E+02 | 0.3392E-04 | 0.2050E+04 | 0x0000ff |
| 0.8220E+02 | 0.2822E-04 | 0.2050E+04 | 0x0000ff |
| 0.8312E+02 | 0.3663E-04 | 0.2050E+04 | 0x0000ff |
| 0.8404E+02 | 0.3679E-04 | 0.2050E+04 | 0x0000ff |
| 0.8496E+02 | 0.2695E-04 | 0.2050E+04 | 0x0000ff |
| 0.8588E+02 | 0.1443E-04 | 0.2050E+04 | 0x0000ff |
| 0.8680E+02 | 0.5570E-05 | 0.2050E+04 | 0x0000ff |
| 0.8772E+02 | 0.1751E-05 | 0.2050E+04 | 0x0000ff |
| 0.8864E+02 | 0.4451E-05 | 0.2050E+04 | 0x0000ff |
| 0.8956E+02 | 0.1838E-04 | 0.2050E+04 | 0x0000ff |
| 0.9048E+02 | 0.2521E-04 | 0.2050E+04 | 0x0000ff |
| 0.9140E+02 | 0.1794E-04 | 0.2050E+04 | 0x0000ff |
| 0.9232E+02 | 0.7989E-05 | 0.2050E+04 | 0x0000ff |
| 0.9323E+02 | 0.2946E-05 | 0.2050E+04 | 0x0000ff |
| 0.9415E+02 | 0.2351E-05 | 0.2050E+04 | 0x0000ff |
| 0.9507E+02 | 0.4502E-05 | 0.2050E+04 | 0x0000ff |
| 0.9599E+02 | 0.6583E-05 | 0.2050E+04 | 0x0000ff |
| 0.9691E+02 | 0.4672E-05 | 0.2050E+04 | 0x0000ff |

# \*\*\*\*\* Standardised \*\*\*\*\*

|            |             |            |             |            |             |            |             |
|------------|-------------|------------|-------------|------------|-------------|------------|-------------|
| -200       | -0.3031E+01 | 0.1149E-03 | -0.2983E+01 | 0.6554E-04 | -0.3071E+01 | 0.8585E-04 | -0.2887E+01 |
| 0.1630E-03 |             |            |             |            |             |            |             |
| -195       | -0.2902E+01 | 0.2609E-03 | -0.2862E+01 | 0.1644E-03 | -0.2931E+01 | 0.1179E-03 | -0.2753E+01 |
| 0.5041E-03 |             |            |             |            |             |            |             |
| -190       | -0.2773E+01 | 0.4975E-03 | -0.2742E+01 | 0.4914E-03 | -0.2792E+01 | 0.2414E-03 | -0.2620E+01 |
| 0.1137E-02 |             |            |             |            |             |            |             |

V1\_Results\_baseline\_IEA.dat

|            |             |            |             |            |             |            |             |
|------------|-------------|------------|-------------|------------|-------------|------------|-------------|
| -185       | -0.2644E+01 | 0.1061E-02 | -0.2622E+01 | 0.1300E-02 | -0.2652E+01 | 0.8402E-03 | -0.2487E+01 |
| 0.2561E-02 |             |            |             |            |             |            |             |
| -180       | -0.2516E+01 | 0.2506E-02 | -0.2501E+01 | 0.2832E-02 | -0.2512E+01 | 0.2387E-02 | -0.2354E+01 |
| 0.5200E-02 |             |            |             |            |             |            |             |
| -175       | -0.2387E+01 | 0.5489E-02 | -0.2381E+01 | 0.5343E-02 | -0.2372E+01 | 0.5022E-02 | -0.2220E+01 |
| 0.1001E-01 |             |            |             |            |             |            |             |
| -170       | -0.2258E+01 | 0.1000E-01 | -0.2261E+01 | 0.1014E-01 | -0.2233E+01 | 0.1028E-01 | -0.2087E+01 |
| 0.1941E-01 |             |            |             |            |             |            |             |
| -165       | -0.2129E+01 | 0.1742E-01 | -0.2140E+01 | 0.1802E-01 | -0.2093E+01 | 0.1967E-01 | -0.1954E+01 |
| 0.3445E-01 |             |            |             |            |             |            |             |
| -160       | -0.2000E+01 | 0.2956E-01 | -0.2020E+01 | 0.2890E-01 | -0.1953E+01 | 0.3546E-01 | -0.1820E+01 |
| 0.5464E-01 |             |            |             |            |             |            |             |
| -155       | -0.1871E+01 | 0.4905E-01 | -0.1900E+01 | 0.4439E-01 | -0.1813E+01 | 0.5660E-01 | -0.1687E+01 |
| 0.8247E-01 |             |            |             |            |             |            |             |
| -150       | -0.1742E+01 | 0.7376E-01 | -0.1779E+01 | 0.6574E-01 | -0.1674E+01 | 0.8334E-01 | -0.1554E+01 |
| 0.1181E+00 |             |            |             |            |             |            |             |
| -145       | -0.1613E+01 | 0.1032E+00 | -0.1659E+01 | 0.9401E-01 | -0.1534E+01 | 0.1209E+00 | -0.1420E+01 |
| 0.1593E+00 |             |            |             |            |             |            |             |
| -140       | -0.1485E+01 | 0.1386E+00 | -0.1539E+01 | 0.1252E+00 | -0.1394E+01 | 0.1676E+00 | -0.1287E+01 |
| 0.2037E+00 |             |            |             |            |             |            |             |
| -135       | -0.1356E+01 | 0.1776E+00 | -0.1418E+01 | 0.1596E+00 | -0.1255E+01 | 0.2179E+00 | -0.1154E+01 |
| 0.2512E+00 |             |            |             |            |             |            |             |
| -130       | -0.1227E+01 | 0.2191E+00 | -0.1298E+01 | 0.1967E+00 | -0.1115E+01 | 0.2652E+00 | -0.1021E+01 |
| 0.2952E+00 |             |            |             |            |             |            |             |
| -125       | -0.1098E+01 | 0.2621E+00 | -0.1178E+01 | 0.2381E+00 | -0.9751E+00 | 0.3088E+00 | -0.8872E+00 |
| 0.3363E+00 |             |            |             |            |             |            |             |
| -120       | -0.9690E+00 | 0.3049E+00 | -0.1057E+01 | 0.2787E+00 | -0.8353E+00 | 0.3472E+00 | -0.7539E+00 |
| 0.3711E+00 |             |            |             |            |             |            |             |
| -115       | -0.8401E+00 | 0.3444E+00 | -0.9368E+00 | 0.3166E+00 | -0.6956E+00 | 0.3803E+00 | -0.6206E+00 |
| 0.3939E+00 |             |            |             |            |             |            |             |
| -110       | -0.7112E+00 | 0.3777E+00 | -0.8165E+00 | 0.3488E+00 | -0.5558E+00 | 0.4061E+00 | -0.4873E+00 |
| 0.4090E+00 |             |            |             |            |             |            |             |
| -105       | -0.5823E+00 | 0.4027E+00 | -0.6961E+00 | 0.3766E+00 | -0.4161E+00 | 0.4211E+00 | -0.3540E+00 |
| 0.4196E+00 |             |            |             |            |             |            |             |
| -100       | -0.4535E+00 | 0.4164E+00 | -0.5758E+00 | 0.3995E+00 | -0.2764E+00 | 0.4248E+00 | -0.2207E+00 |
| 0.4222E+00 |             |            |             |            |             |            |             |

V1\_Results\_baseline\_IEA.dat

|            |             |            |             |            |             |            |             |
|------------|-------------|------------|-------------|------------|-------------|------------|-------------|
| -95        | -0.3246E+00 | 0.4236E+00 | -0.4555E+00 | 0.4157E+00 | -0.1366E+00 | 0.4201E+00 | -0.8742E-01 |
| 0.4151E+00 |             |            |             |            |             |            |             |
| -90        | -0.1957E+00 | 0.4237E+00 | -0.3351E+00 | 0.4239E+00 | 0.3085E-02  | 0.4015E+00 | 0.4588E-01  |
| 0.4005E+00 |             |            |             |            |             |            |             |
| -85        | -0.6683E-01 | 0.4143E+00 | -0.2148E+00 | 0.4215E+00 | 0.1428E+00  | 0.3777E+00 | 0.1792E+00  |
| 0.3782E+00 |             |            |             |            |             |            |             |
| -80        | 0.6205E-01  | 0.3954E+00 | -0.9442E-01 | 0.4095E+00 | 0.2826E+00  | 0.3535E+00 | 0.3125E+00  |
| 0.3495E+00 |             |            |             |            |             |            |             |
| -75        | 0.1909E+00  | 0.3743E+00 | 0.2593E-01  | 0.3941E+00 | 0.4223E+00  | 0.3282E+00 | 0.4458E+00  |
| 0.3177E+00 |             |            |             |            |             |            |             |
| -70        | 0.3198E+00  | 0.3493E+00 | 0.1463E+00  | 0.3789E+00 | 0.5620E+00  | 0.2952E+00 | 0.5791E+00  |
| 0.2885E+00 |             |            |             |            |             |            |             |
| -65        | 0.4487E+00  | 0.3200E+00 | 0.2666E+00  | 0.3586E+00 | 0.7018E+00  | 0.2606E+00 | 0.7124E+00  |
| 0.2587E+00 |             |            |             |            |             |            |             |
| -60        | 0.5776E+00  | 0.2892E+00 | 0.3870E+00  | 0.3311E+00 | 0.8415E+00  | 0.2269E+00 | 0.8457E+00  |
| 0.2279E+00 |             |            |             |            |             |            |             |
| -55        | 0.7065E+00  | 0.2592E+00 | 0.5073E+00  | 0.3027E+00 | 0.9812E+00  | 0.1972E+00 | 0.9790E+00  |
| 0.1989E+00 |             |            |             |            |             |            |             |
| -50        | 0.8353E+00  | 0.2298E+00 | 0.6277E+00  | 0.2764E+00 | 0.1121E+01  | 0.1700E+00 | 0.1112E+01  |
| 0.1755E+00 |             |            |             |            |             |            |             |
| -45        | 0.9642E+00  | 0.2026E+00 | 0.7480E+00  | 0.2526E+00 | 0.1261E+01  | 0.1458E+00 | 0.1246E+01  |
| 0.1509E+00 |             |            |             |            |             |            |             |
| -40        | 0.1093E+01  | 0.1770E+00 | 0.8683E+00  | 0.2299E+00 | 0.1400E+01  | 0.1246E+00 | 0.1379E+01  |
| 0.1272E+00 |             |            |             |            |             |            |             |
| -35        | 0.1222E+01  | 0.1548E+00 | 0.9887E+00  | 0.2067E+00 | 0.1540E+01  | 0.1061E+00 | 0.1512E+01  |
| 0.1071E+00 |             |            |             |            |             |            |             |
| -30        | 0.1351E+01  | 0.1335E+00 | 0.1109E+01  | 0.1806E+00 | 0.1680E+01  | 0.8924E-01 | 0.1646E+01  |
| 0.9021E-01 |             |            |             |            |             |            |             |
| -25        | 0.1480E+01  | 0.1136E+00 | 0.1229E+01  | 0.1546E+00 | 0.1820E+01  | 0.7221E-01 | 0.1779E+01  |
| 0.7695E-01 |             |            |             |            |             |            |             |
| -20        | 0.1609E+01  | 0.9641E-01 | 0.1350E+01  | 0.1320E+00 | 0.1959E+01  | 0.5918E-01 | 0.1912E+01  |
| 0.6426E-01 |             |            |             |            |             |            |             |
| -15        | 0.1738E+01  | 0.8282E-01 | 0.1470E+01  | 0.1144E+00 | 0.2099E+01  | 0.4888E-01 | 0.2045E+01  |
| 0.5182E-01 |             |            |             |            |             |            |             |
| -10        | 0.1866E+01  | 0.7029E-01 | 0.1590E+01  | 0.9950E-01 | 0.2239E+01  | 0.3946E-01 | 0.2179E+01  |
| 0.4151E-01 |             |            |             |            |             |            |             |

|            | V1_Results_baseline_IEA.dat |            |            |            |            |            |            |
|------------|-----------------------------|------------|------------|------------|------------|------------|------------|
| -5         | 0.1995E+01                  | 0.5755E-01 | 0.1711E+01 | 0.8545E-01 | 0.2379E+01 | 0.3134E-01 | 0.2312E+01 |
| 0.3502E-01 |                             |            |            |            |            |            |            |
| 0          | 0.2124E+01                  | 0.4662E-01 | 0.1831E+01 | 0.7248E-01 | 0.2518E+01 | 0.2671E-01 | 0.2445E+01 |
| 0.2966E-01 |                             |            |            |            |            |            |            |
| 5          | 0.2253E+01                  | 0.3718E-01 | 0.1951E+01 | 0.6108E-01 | 0.2658E+01 | 0.2200E-01 | 0.2579E+01 |
| 0.2409E-01 |                             |            |            |            |            |            |            |
| 10         | 0.2382E+01                  | 0.3091E-01 | 0.2072E+01 | 0.5077E-01 | 0.2798E+01 | 0.1720E-01 | 0.2712E+01 |
| 0.1895E-01 |                             |            |            |            |            |            |            |
| 15         | 0.2511E+01                  | 0.2564E-01 | 0.2192E+01 | 0.4177E-01 | 0.2937E+01 | 0.1337E-01 | 0.2845E+01 |
| 0.1510E-01 |                             |            |            |            |            |            |            |
| 20         | 0.2640E+01                  | 0.2109E-01 | 0.2312E+01 | 0.3523E-01 | 0.3077E+01 | 0.1067E-01 | 0.2979E+01 |
| 0.1246E-01 |                             |            |            |            |            |            |            |
| 25         | 0.2769E+01                  | 0.1719E-01 | 0.2433E+01 | 0.2982E-01 | 0.3217E+01 | 0.9198E-02 | 0.3112E+01 |
| 0.1057E-01 |                             |            |            |            |            |            |            |
| 30         | 0.2897E+01                  | 0.1409E-01 | 0.2553E+01 | 0.2458E-01 | 0.3357E+01 | 0.7604E-02 | 0.3245E+01 |
| 0.8564E-02 |                             |            |            |            |            |            |            |
| 35         | 0.3026E+01                  | 0.1147E-01 | 0.2674E+01 | 0.1956E-01 | 0.3496E+01 | 0.5713E-02 | 0.3378E+01 |
| 0.6563E-02 |                             |            |            |            |            |            |            |
| 40         | 0.3155E+01                  | 0.9286E-02 | 0.2794E+01 | 0.1647E-01 | 0.3636E+01 | 0.4360E-02 | 0.3512E+01 |
| 0.5623E-02 |                             |            |            |            |            |            |            |
| 45         | 0.3284E+01                  | 0.7401E-02 | 0.2914E+01 | 0.1467E-01 | 0.3776E+01 | 0.3605E-02 | 0.3645E+01 |
| 0.4789E-02 |                             |            |            |            |            |            |            |
| 50         | 0.3413E+01                  | 0.5710E-02 | 0.3035E+01 | 0.1226E-01 | 0.3916E+01 | 0.2896E-02 | 0.3778E+01 |
| 0.3612E-02 |                             |            |            |            |            |            |            |
| 55         | 0.3542E+01                  | 0.4764E-02 | 0.3155E+01 | 0.9605E-02 | 0.4055E+01 | 0.2065E-02 | 0.3912E+01 |
| 0.2658E-02 |                             |            |            |            |            |            |            |
| 60         | 0.3671E+01                  | 0.4149E-02 | 0.3275E+01 | 0.7205E-02 | 0.4195E+01 | 0.1613E-02 | 0.4045E+01 |
| 0.2299E-02 |                             |            |            |            |            |            |            |
| 65         | 0.3800E+01                  | 0.3693E-02 | 0.3396E+01 | 0.6064E-02 | 0.4335E+01 | 0.1374E-02 | 0.4178E+01 |
| 0.1977E-02 |                             |            |            |            |            |            |            |
| 70         | 0.3928E+01                  | 0.3107E-02 | 0.3516E+01 | 0.4932E-02 | 0.4475E+01 | 0.1081E-02 | 0.4312E+01 |
| 0.1669E-02 |                             |            |            |            |            |            |            |
| 75         | 0.4057E+01                  | 0.2551E-02 | 0.3636E+01 | 0.4288E-02 | 0.4614E+01 | 0.7510E-03 | 0.4445E+01 |
| 0.1216E-02 |                             |            |            |            |            |            |            |
| 80         | 0.4186E+01                  | 0.1824E-02 | 0.3757E+01 | 0.3689E-02 | 0.4754E+01 | 0.6186E-03 | 0.4578E+01 |
| 0.9730E-03 |                             |            |            |            |            |            |            |

| V1_Results_baseline_IEA.dat |            |            |            |            |            |            |            |
|-----------------------------|------------|------------|------------|------------|------------|------------|------------|
| 85                          | 0.4315E+01 | 0.1408E-02 | 0.3877E+01 | 0.3036E-02 | 0.4894E+01 | 0.6137E-03 | 0.4711E+01 |
| 0.8495E-03                  |            |            |            |            |            |            |            |
| 90                          | 0.4444E+01 | 0.1274E-02 | 0.3997E+01 | 0.2276E-02 | 0.5033E+01 | 0.5286E-03 | 0.4845E+01 |
| 0.7456E-03                  |            |            |            |            |            |            |            |
| 95                          | 0.4573E+01 | 0.1127E-02 | 0.4118E+01 | 0.1889E-02 | 0.5173E+01 | 0.3674E-03 | 0.4978E+01 |
| 0.5407E-03                  |            |            |            |            |            |            |            |
| 100                         | 0.4702E+01 | 0.7335E-03 | 0.4238E+01 | 0.1744E-02 | 0.5313E+01 | 0.2852E-03 | 0.5111E+01 |
| 0.4233E-03                  |            |            |            |            |            |            |            |
| 105                         | 0.4831E+01 | 0.4880E-03 | 0.4358E+01 | 0.1466E-02 | 0.5453E+01 | 0.3214E-03 | 0.5245E+01 |
| 0.3591E-03                  |            |            |            |            |            |            |            |
| 110                         | 0.4960E+01 | 0.5309E-03 | 0.4479E+01 | 0.1267E-02 | 0.5592E+01 | 0.2802E-03 | 0.5378E+01 |
| 0.3072E-03                  |            |            |            |            |            |            |            |
| 115                         | 0.5088E+01 | 0.5477E-03 | 0.4599E+01 | 0.9908E-03 | 0.5732E+01 | 0.1943E-03 | 0.5511E+01 |
| 0.2340E-03                  |            |            |            |            |            |            |            |
| 120                         | 0.5217E+01 | 0.4470E-03 | 0.4719E+01 | 0.6799E-03 | 0.5872E+01 | 0.2209E-03 | 0.5645E+01 |
| 0.1946E-03                  |            |            |            |            |            |            |            |
| 125                         | 0.5346E+01 | 0.2935E-03 | 0.4840E+01 | 0.4307E-03 | 0.6012E+01 | 0.1944E-03 | 0.5778E+01 |
| 0.2527E-03                  |            |            |            |            |            |            |            |
| 130                         | 0.5475E+01 | 0.2846E-03 | 0.4960E+01 | 0.3687E-03 | 0.6151E+01 | 0.1584E-03 | 0.5911E+01 |
| 0.2538E-03                  |            |            |            |            |            |            |            |
| 135                         | 0.5604E+01 | 0.3178E-03 | 0.5080E+01 | 0.2649E-03 | 0.6291E+01 | 0.1151E-03 | 0.6044E+01 |
| 0.1859E-03                  |            |            |            |            |            |            |            |
| 140                         | 0.5733E+01 | 0.3042E-03 | 0.5201E+01 | 0.2260E-03 | 0.6431E+01 | 0.5568E-04 | 0.6178E+01 |
| 0.9954E-04                  |            |            |            |            |            |            |            |
| 145                         | 0.5862E+01 | 0.2162E-03 | 0.5321E+01 | 0.2263E-03 | 0.6571E+01 | 0.5742E-04 | 0.6311E+01 |
| 0.3842E-04                  |            |            |            |            |            |            |            |
| 150                         | 0.5991E+01 | 0.1350E-03 | 0.5441E+01 | 0.1958E-03 | 0.6710E+01 | 0.5087E-04 | 0.6444E+01 |
| 0.1208E-04                  |            |            |            |            |            |            |            |
| 155                         | 0.6119E+01 | 0.7351E-04 | 0.5562E+01 | 0.1432E-03 | 0.6850E+01 | 0.3980E-04 | 0.6578E+01 |
| 0.3070E-04                  |            |            |            |            |            |            |            |
| 160                         | 0.6248E+01 | 0.5003E-04 | 0.5682E+01 | 0.1142E-03 | 0.6990E+01 | 0.3080E-04 | 0.6711E+01 |
| 0.1268E-03                  |            |            |            |            |            |            |            |
| 165                         | 0.6377E+01 | 0.5971E-04 | 0.5802E+01 | 0.7842E-04 | 0.7129E+01 | 0.1370E-04 | 0.6844E+01 |
| 0.1739E-03                  |            |            |            |            |            |            |            |
| 170                         | 0.6506E+01 | 0.7714E-04 | 0.5923E+01 | 0.7950E-04 | 0.7269E+01 | 0.0000E+00 | 0.6978E+01 |
| 0.1237E-03                  |            |            |            |            |            |            |            |

```

                                V1_Results_baseline_IEA.dat
  175  0.6635E+01  0.9517E-04  0.6043E+01  0.1153E-03  0.7409E+01  0.0000E+00  0.7111E+01
0.5511E-04
  180  0.6764E+01  0.9067E-04  0.6164E+01  0.1136E-03  0.7549E+01  0.0000E+00  0.7244E+01
0.2032E-04
  185  0.6893E+01  0.6799E-04  0.6284E+01  0.5431E-04  0.7688E+01  0.0000E+00  0.7378E+01
0.1622E-04
  190  0.7022E+01  0.4396E-04  0.6404E+01  0.3167E-04  0.7828E+01  0.0000E+00  0.7511E+01
0.3106E-04
  195  0.7150E+01  0.6678E-04  0.6525E+01  0.5332E-04  0.7968E+01  0.1834E-04  0.7644E+01
0.4541E-04
  200  0.7279E+01  0.5994E-04  0.6645E+01  0.5309E-04  0.8108E+01  0.3153E-04  0.7777E+01
0.3223E-04

```

```

#      *****      adaptados para un plot en 3D con gnuplot      *****

```

```

-0.3031E+01  0.1149E-03  0.2020E+04
-0.2902E+01  0.2609E-03  0.2020E+04
-0.2773E+01  0.4975E-03  0.2020E+04
-0.2644E+01  0.1061E-02  0.2020E+04
-0.2516E+01  0.2506E-02  0.2020E+04
-0.2387E+01  0.5489E-02  0.2020E+04
-0.2258E+01  0.1000E-01  0.2020E+04
-0.2129E+01  0.1742E-01  0.2020E+04
-0.2000E+01  0.2956E-01  0.2020E+04
-0.1871E+01  0.4905E-01  0.2020E+04
-0.1742E+01  0.7376E-01  0.2020E+04
-0.1613E+01  0.1032E+00  0.2020E+04
-0.1485E+01  0.1386E+00  0.2020E+04
-0.1356E+01  0.1776E+00  0.2020E+04
-0.1227E+01  0.2191E+00  0.2020E+04
-0.1098E+01  0.2621E+00  0.2020E+04
-0.9690E+00  0.3049E+00  0.2020E+04
-0.8401E+00  0.3444E+00  0.2020E+04
-0.7112E+00  0.3777E+00  0.2020E+04
-0.5823E+00  0.4027E+00  0.2020E+04
-0.4535E+00  0.4164E+00  0.2020E+04

```



V1\_Results\_baseline\_IEA.dat

|             |            |            |
|-------------|------------|------------|
| -0.3246E+00 | 0.4236E+00 | 0.2020E+04 |
| -0.1957E+00 | 0.4237E+00 | 0.2020E+04 |
| -0.6683E-01 | 0.4143E+00 | 0.2020E+04 |
| 0.6205E-01  | 0.3954E+00 | 0.2020E+04 |
| 0.1909E+00  | 0.3743E+00 | 0.2020E+04 |
| 0.3198E+00  | 0.3493E+00 | 0.2020E+04 |
| 0.4487E+00  | 0.3200E+00 | 0.2020E+04 |
| 0.5776E+00  | 0.2892E+00 | 0.2020E+04 |
| 0.7065E+00  | 0.2592E+00 | 0.2020E+04 |
| 0.8353E+00  | 0.2298E+00 | 0.2020E+04 |
| 0.9642E+00  | 0.2026E+00 | 0.2020E+04 |
| 0.1093E+01  | 0.1770E+00 | 0.2020E+04 |
| 0.1222E+01  | 0.1548E+00 | 0.2020E+04 |
| 0.1351E+01  | 0.1335E+00 | 0.2020E+04 |
| 0.1480E+01  | 0.1136E+00 | 0.2020E+04 |
| 0.1609E+01  | 0.9641E-01 | 0.2020E+04 |
| 0.1738E+01  | 0.8282E-01 | 0.2020E+04 |
| 0.1866E+01  | 0.7029E-01 | 0.2020E+04 |
| 0.1995E+01  | 0.5755E-01 | 0.2020E+04 |
| 0.2124E+01  | 0.4662E-01 | 0.2020E+04 |
| 0.2253E+01  | 0.3718E-01 | 0.2020E+04 |
| 0.2382E+01  | 0.3091E-01 | 0.2020E+04 |
| 0.2511E+01  | 0.2564E-01 | 0.2020E+04 |
| 0.2640E+01  | 0.2109E-01 | 0.2020E+04 |
| 0.2769E+01  | 0.1719E-01 | 0.2020E+04 |
| 0.2897E+01  | 0.1409E-01 | 0.2020E+04 |
| 0.3026E+01  | 0.1147E-01 | 0.2020E+04 |
| 0.3155E+01  | 0.9286E-02 | 0.2020E+04 |
| 0.3284E+01  | 0.7401E-02 | 0.2020E+04 |
| 0.3413E+01  | 0.5710E-02 | 0.2020E+04 |
| 0.3542E+01  | 0.4764E-02 | 0.2020E+04 |
| 0.3671E+01  | 0.4149E-02 | 0.2020E+04 |
| 0.3800E+01  | 0.3693E-02 | 0.2020E+04 |
| 0.3928E+01  | 0.3107E-02 | 0.2020E+04 |
| 0.4057E+01  | 0.2551E-02 | 0.2020E+04 |
| 0.4186E+01  | 0.1824E-02 | 0.2020E+04 |

V1\_Results\_baseline\_IEA.dat

|             |            |            |
|-------------|------------|------------|
| 0.4315E+01  | 0.1408E-02 | 0.2020E+04 |
| 0.4444E+01  | 0.1274E-02 | 0.2020E+04 |
| 0.4573E+01  | 0.1127E-02 | 0.2020E+04 |
| 0.4702E+01  | 0.7335E-03 | 0.2020E+04 |
| 0.4831E+01  | 0.4880E-03 | 0.2020E+04 |
| 0.4960E+01  | 0.5309E-03 | 0.2020E+04 |
| 0.5088E+01  | 0.5477E-03 | 0.2020E+04 |
| 0.5217E+01  | 0.4470E-03 | 0.2020E+04 |
| 0.5346E+01  | 0.2935E-03 | 0.2020E+04 |
| 0.5475E+01  | 0.2846E-03 | 0.2020E+04 |
| 0.5604E+01  | 0.3178E-03 | 0.2020E+04 |
| 0.5733E+01  | 0.3042E-03 | 0.2020E+04 |
| 0.5862E+01  | 0.2162E-03 | 0.2020E+04 |
| 0.5991E+01  | 0.1350E-03 | 0.2020E+04 |
| 0.6119E+01  | 0.7351E-04 | 0.2020E+04 |
| 0.6248E+01  | 0.5003E-04 | 0.2020E+04 |
| 0.6377E+01  | 0.5971E-04 | 0.2020E+04 |
| 0.6506E+01  | 0.7714E-04 | 0.2020E+04 |
| 0.6635E+01  | 0.9517E-04 | 0.2020E+04 |
| 0.6764E+01  | 0.9067E-04 | 0.2020E+04 |
| 0.6893E+01  | 0.6799E-04 | 0.2020E+04 |
| 0.7022E+01  | 0.4396E-04 | 0.2020E+04 |
| 0.7150E+01  | 0.6678E-04 | 0.2020E+04 |
| 0.7279E+01  | 0.5994E-04 | 0.2020E+04 |
|             |            |            |
| -0.2983E+01 | 0.6554E-04 | 0.2030E+04 |
| -0.2862E+01 | 0.1644E-03 | 0.2030E+04 |
| -0.2742E+01 | 0.4914E-03 | 0.2030E+04 |
| -0.2622E+01 | 0.1300E-02 | 0.2030E+04 |
| -0.2501E+01 | 0.2832E-02 | 0.2030E+04 |
| -0.2381E+01 | 0.5343E-02 | 0.2030E+04 |
| -0.2261E+01 | 0.1014E-01 | 0.2030E+04 |
| -0.2140E+01 | 0.1802E-01 | 0.2030E+04 |
| -0.2020E+01 | 0.2890E-01 | 0.2030E+04 |
| -0.1900E+01 | 0.4439E-01 | 0.2030E+04 |
| -0.1779E+01 | 0.6574E-01 | 0.2030E+04 |

V1\_Results\_baseline\_IEA.dat

|             |            |            |
|-------------|------------|------------|
| -0.1659E+01 | 0.9401E-01 | 0.2030E+04 |
| -0.1539E+01 | 0.1252E+00 | 0.2030E+04 |
| -0.1418E+01 | 0.1596E+00 | 0.2030E+04 |
| -0.1298E+01 | 0.1967E+00 | 0.2030E+04 |
| -0.1178E+01 | 0.2381E+00 | 0.2030E+04 |
| -0.1057E+01 | 0.2787E+00 | 0.2030E+04 |
| -0.9368E+00 | 0.3166E+00 | 0.2030E+04 |
| -0.8165E+00 | 0.3488E+00 | 0.2030E+04 |
| -0.6961E+00 | 0.3766E+00 | 0.2030E+04 |
| -0.5758E+00 | 0.3995E+00 | 0.2030E+04 |
| -0.4555E+00 | 0.4157E+00 | 0.2030E+04 |
| -0.3351E+00 | 0.4239E+00 | 0.2030E+04 |
| -0.2148E+00 | 0.4215E+00 | 0.2030E+04 |
| -0.9442E-01 | 0.4095E+00 | 0.2030E+04 |
| 0.2593E-01  | 0.3941E+00 | 0.2030E+04 |
| 0.1463E+00  | 0.3789E+00 | 0.2030E+04 |
| 0.2666E+00  | 0.3586E+00 | 0.2030E+04 |
| 0.3870E+00  | 0.3311E+00 | 0.2030E+04 |
| 0.5073E+00  | 0.3027E+00 | 0.2030E+04 |
| 0.6277E+00  | 0.2764E+00 | 0.2030E+04 |
| 0.7480E+00  | 0.2526E+00 | 0.2030E+04 |
| 0.8683E+00  | 0.2299E+00 | 0.2030E+04 |
| 0.9887E+00  | 0.2067E+00 | 0.2030E+04 |
| 0.1109E+01  | 0.1806E+00 | 0.2030E+04 |
| 0.1229E+01  | 0.1546E+00 | 0.2030E+04 |
| 0.1350E+01  | 0.1320E+00 | 0.2030E+04 |
| 0.1470E+01  | 0.1144E+00 | 0.2030E+04 |
| 0.1590E+01  | 0.9950E-01 | 0.2030E+04 |
| 0.1711E+01  | 0.8545E-01 | 0.2030E+04 |
| 0.1831E+01  | 0.7248E-01 | 0.2030E+04 |
| 0.1951E+01  | 0.6108E-01 | 0.2030E+04 |
| 0.2072E+01  | 0.5077E-01 | 0.2030E+04 |
| 0.2192E+01  | 0.4177E-01 | 0.2030E+04 |
| 0.2312E+01  | 0.3523E-01 | 0.2030E+04 |
| 0.2433E+01  | 0.2982E-01 | 0.2030E+04 |
| 0.2553E+01  | 0.2458E-01 | 0.2030E+04 |

V1\_Results\_baseline\_IEA.dat

|             |            |            |
|-------------|------------|------------|
| 0.2674E+01  | 0.1956E-01 | 0.2030E+04 |
| 0.2794E+01  | 0.1647E-01 | 0.2030E+04 |
| 0.2914E+01  | 0.1467E-01 | 0.2030E+04 |
| 0.3035E+01  | 0.1226E-01 | 0.2030E+04 |
| 0.3155E+01  | 0.9605E-02 | 0.2030E+04 |
| 0.3275E+01  | 0.7205E-02 | 0.2030E+04 |
| 0.3396E+01  | 0.6064E-02 | 0.2030E+04 |
| 0.3516E+01  | 0.4932E-02 | 0.2030E+04 |
| 0.3636E+01  | 0.4288E-02 | 0.2030E+04 |
| 0.3757E+01  | 0.3689E-02 | 0.2030E+04 |
| 0.3877E+01  | 0.3036E-02 | 0.2030E+04 |
| 0.3997E+01  | 0.2276E-02 | 0.2030E+04 |
| 0.4118E+01  | 0.1889E-02 | 0.2030E+04 |
| 0.4238E+01  | 0.1744E-02 | 0.2030E+04 |
| 0.4358E+01  | 0.1466E-02 | 0.2030E+04 |
| 0.4479E+01  | 0.1267E-02 | 0.2030E+04 |
| 0.4599E+01  | 0.9908E-03 | 0.2030E+04 |
| 0.4719E+01  | 0.6799E-03 | 0.2030E+04 |
| 0.4840E+01  | 0.4307E-03 | 0.2030E+04 |
| 0.4960E+01  | 0.3687E-03 | 0.2030E+04 |
| 0.5080E+01  | 0.2649E-03 | 0.2030E+04 |
| 0.5201E+01  | 0.2260E-03 | 0.2030E+04 |
| 0.5321E+01  | 0.2263E-03 | 0.2030E+04 |
| 0.5441E+01  | 0.1958E-03 | 0.2030E+04 |
| 0.5562E+01  | 0.1432E-03 | 0.2030E+04 |
| 0.5682E+01  | 0.1142E-03 | 0.2030E+04 |
| 0.5802E+01  | 0.7842E-04 | 0.2030E+04 |
| 0.5923E+01  | 0.7950E-04 | 0.2030E+04 |
| 0.6043E+01  | 0.1153E-03 | 0.2030E+04 |
| 0.6164E+01  | 0.1136E-03 | 0.2030E+04 |
| 0.6284E+01  | 0.5431E-04 | 0.2030E+04 |
| 0.6404E+01  | 0.3167E-04 | 0.2030E+04 |
| 0.6525E+01  | 0.5332E-04 | 0.2030E+04 |
| 0.6645E+01  | 0.5309E-04 | 0.2030E+04 |
| -0.3071E+01 | 0.8585E-04 | 0.2040E+04 |

V1\_Results\_baseline\_IEA.dat

|             |            |            |
|-------------|------------|------------|
| -0.2931E+01 | 0.1179E-03 | 0.2040E+04 |
| -0.2792E+01 | 0.2414E-03 | 0.2040E+04 |
| -0.2652E+01 | 0.8402E-03 | 0.2040E+04 |
| -0.2512E+01 | 0.2387E-02 | 0.2040E+04 |
| -0.2372E+01 | 0.5022E-02 | 0.2040E+04 |
| -0.2233E+01 | 0.1028E-01 | 0.2040E+04 |
| -0.2093E+01 | 0.1967E-01 | 0.2040E+04 |
| -0.1953E+01 | 0.3546E-01 | 0.2040E+04 |
| -0.1813E+01 | 0.5660E-01 | 0.2040E+04 |
| -0.1674E+01 | 0.8334E-01 | 0.2040E+04 |
| -0.1534E+01 | 0.1209E+00 | 0.2040E+04 |
| -0.1394E+01 | 0.1676E+00 | 0.2040E+04 |
| -0.1255E+01 | 0.2179E+00 | 0.2040E+04 |
| -0.1115E+01 | 0.2652E+00 | 0.2040E+04 |
| -0.9751E+00 | 0.3088E+00 | 0.2040E+04 |
| -0.8353E+00 | 0.3472E+00 | 0.2040E+04 |
| -0.6956E+00 | 0.3803E+00 | 0.2040E+04 |
| -0.5558E+00 | 0.4061E+00 | 0.2040E+04 |
| -0.4161E+00 | 0.4211E+00 | 0.2040E+04 |
| -0.2764E+00 | 0.4248E+00 | 0.2040E+04 |
| -0.1366E+00 | 0.4201E+00 | 0.2040E+04 |
| 0.3085E-02  | 0.4015E+00 | 0.2040E+04 |
| 0.1428E+00  | 0.3777E+00 | 0.2040E+04 |
| 0.2826E+00  | 0.3535E+00 | 0.2040E+04 |
| 0.4223E+00  | 0.3282E+00 | 0.2040E+04 |
| 0.5620E+00  | 0.2952E+00 | 0.2040E+04 |
| 0.7018E+00  | 0.2606E+00 | 0.2040E+04 |
| 0.8415E+00  | 0.2269E+00 | 0.2040E+04 |
| 0.9812E+00  | 0.1972E+00 | 0.2040E+04 |
| 0.1121E+01  | 0.1700E+00 | 0.2040E+04 |
| 0.1261E+01  | 0.1458E+00 | 0.2040E+04 |
| 0.1400E+01  | 0.1246E+00 | 0.2040E+04 |
| 0.1540E+01  | 0.1061E+00 | 0.2040E+04 |
| 0.1680E+01  | 0.8924E-01 | 0.2040E+04 |
| 0.1820E+01  | 0.7221E-01 | 0.2040E+04 |
| 0.1959E+01  | 0.5918E-01 | 0.2040E+04 |

V1\_Results\_baseline\_IEA.dat

|            |            |            |
|------------|------------|------------|
| 0.2099E+01 | 0.4888E-01 | 0.2040E+04 |
| 0.2239E+01 | 0.3946E-01 | 0.2040E+04 |
| 0.2379E+01 | 0.3134E-01 | 0.2040E+04 |
| 0.2518E+01 | 0.2671E-01 | 0.2040E+04 |
| 0.2658E+01 | 0.2200E-01 | 0.2040E+04 |
| 0.2798E+01 | 0.1720E-01 | 0.2040E+04 |
| 0.2937E+01 | 0.1337E-01 | 0.2040E+04 |
| 0.3077E+01 | 0.1067E-01 | 0.2040E+04 |
| 0.3217E+01 | 0.9198E-02 | 0.2040E+04 |
| 0.3357E+01 | 0.7604E-02 | 0.2040E+04 |
| 0.3496E+01 | 0.5713E-02 | 0.2040E+04 |
| 0.3636E+01 | 0.4360E-02 | 0.2040E+04 |
| 0.3776E+01 | 0.3605E-02 | 0.2040E+04 |
| 0.3916E+01 | 0.2896E-02 | 0.2040E+04 |
| 0.4055E+01 | 0.2065E-02 | 0.2040E+04 |
| 0.4195E+01 | 0.1613E-02 | 0.2040E+04 |
| 0.4335E+01 | 0.1374E-02 | 0.2040E+04 |
| 0.4475E+01 | 0.1081E-02 | 0.2040E+04 |
| 0.4614E+01 | 0.7510E-03 | 0.2040E+04 |
| 0.4754E+01 | 0.6186E-03 | 0.2040E+04 |
| 0.4894E+01 | 0.6137E-03 | 0.2040E+04 |
| 0.5033E+01 | 0.5286E-03 | 0.2040E+04 |
| 0.5173E+01 | 0.3674E-03 | 0.2040E+04 |
| 0.5313E+01 | 0.2852E-03 | 0.2040E+04 |
| 0.5453E+01 | 0.3214E-03 | 0.2040E+04 |
| 0.5592E+01 | 0.2802E-03 | 0.2040E+04 |
| 0.5732E+01 | 0.1943E-03 | 0.2040E+04 |
| 0.5872E+01 | 0.2209E-03 | 0.2040E+04 |
| 0.6012E+01 | 0.1944E-03 | 0.2040E+04 |
| 0.6151E+01 | 0.1584E-03 | 0.2040E+04 |
| 0.6291E+01 | 0.1151E-03 | 0.2040E+04 |
| 0.6431E+01 | 0.5568E-04 | 0.2040E+04 |
| 0.6571E+01 | 0.5742E-04 | 0.2040E+04 |
| 0.6710E+01 | 0.5087E-04 | 0.2040E+04 |
| 0.6850E+01 | 0.3980E-04 | 0.2040E+04 |
| 0.6990E+01 | 0.3080E-04 | 0.2040E+04 |

V1\_Results\_baseline\_IEA.dat

|             |            |            |
|-------------|------------|------------|
| 0.7129E+01  | 0.1370E-04 | 0.2040E+04 |
| 0.7269E+01  | 0.0000E+00 | 0.2040E+04 |
| 0.7409E+01  | 0.0000E+00 | 0.2040E+04 |
| 0.7549E+01  | 0.0000E+00 | 0.2040E+04 |
| 0.7688E+01  | 0.0000E+00 | 0.2040E+04 |
| 0.7828E+01  | 0.0000E+00 | 0.2040E+04 |
| 0.7968E+01  | 0.1834E-04 | 0.2040E+04 |
| 0.8108E+01  | 0.3153E-04 | 0.2040E+04 |
|             |            |            |
| -0.2887E+01 | 0.1630E-03 | 0.2050E+04 |
| -0.2753E+01 | 0.5041E-03 | 0.2050E+04 |
| -0.2620E+01 | 0.1137E-02 | 0.2050E+04 |
| -0.2487E+01 | 0.2561E-02 | 0.2050E+04 |
| -0.2354E+01 | 0.5200E-02 | 0.2050E+04 |
| -0.2220E+01 | 0.1001E-01 | 0.2050E+04 |
| -0.2087E+01 | 0.1941E-01 | 0.2050E+04 |
| -0.1954E+01 | 0.3445E-01 | 0.2050E+04 |
| -0.1820E+01 | 0.5464E-01 | 0.2050E+04 |
| -0.1687E+01 | 0.8247E-01 | 0.2050E+04 |
| -0.1554E+01 | 0.1181E+00 | 0.2050E+04 |
| -0.1420E+01 | 0.1593E+00 | 0.2050E+04 |
| -0.1287E+01 | 0.2037E+00 | 0.2050E+04 |
| -0.1154E+01 | 0.2512E+00 | 0.2050E+04 |
| -0.1021E+01 | 0.2952E+00 | 0.2050E+04 |
| -0.8872E+00 | 0.3363E+00 | 0.2050E+04 |
| -0.7539E+00 | 0.3711E+00 | 0.2050E+04 |
| -0.6206E+00 | 0.3939E+00 | 0.2050E+04 |
| -0.4873E+00 | 0.4090E+00 | 0.2050E+04 |
| -0.3540E+00 | 0.4196E+00 | 0.2050E+04 |
| -0.2207E+00 | 0.4222E+00 | 0.2050E+04 |
| -0.8742E-01 | 0.4151E+00 | 0.2050E+04 |
| 0.4588E-01  | 0.4005E+00 | 0.2050E+04 |
| 0.1792E+00  | 0.3782E+00 | 0.2050E+04 |
| 0.3125E+00  | 0.3495E+00 | 0.2050E+04 |
| 0.4458E+00  | 0.3177E+00 | 0.2050E+04 |
| 0.5791E+00  | 0.2885E+00 | 0.2050E+04 |

V1\_Results\_baseline\_IEA.dat

|            |            |            |
|------------|------------|------------|
| 0.7124E+00 | 0.2587E+00 | 0.2050E+04 |
| 0.8457E+00 | 0.2279E+00 | 0.2050E+04 |
| 0.9790E+00 | 0.1989E+00 | 0.2050E+04 |
| 0.1112E+01 | 0.1755E+00 | 0.2050E+04 |
| 0.1246E+01 | 0.1509E+00 | 0.2050E+04 |
| 0.1379E+01 | 0.1272E+00 | 0.2050E+04 |
| 0.1512E+01 | 0.1071E+00 | 0.2050E+04 |
| 0.1646E+01 | 0.9021E-01 | 0.2050E+04 |
| 0.1779E+01 | 0.7695E-01 | 0.2050E+04 |
| 0.1912E+01 | 0.6426E-01 | 0.2050E+04 |
| 0.2045E+01 | 0.5182E-01 | 0.2050E+04 |
| 0.2179E+01 | 0.4151E-01 | 0.2050E+04 |
| 0.2312E+01 | 0.3502E-01 | 0.2050E+04 |
| 0.2445E+01 | 0.2966E-01 | 0.2050E+04 |
| 0.2579E+01 | 0.2409E-01 | 0.2050E+04 |
| 0.2712E+01 | 0.1895E-01 | 0.2050E+04 |
| 0.2845E+01 | 0.1510E-01 | 0.2050E+04 |
| 0.2979E+01 | 0.1246E-01 | 0.2050E+04 |
| 0.3112E+01 | 0.1057E-01 | 0.2050E+04 |
| 0.3245E+01 | 0.8564E-02 | 0.2050E+04 |
| 0.3378E+01 | 0.6563E-02 | 0.2050E+04 |
| 0.3512E+01 | 0.5623E-02 | 0.2050E+04 |
| 0.3645E+01 | 0.4789E-02 | 0.2050E+04 |
| 0.3778E+01 | 0.3612E-02 | 0.2050E+04 |
| 0.3912E+01 | 0.2658E-02 | 0.2050E+04 |
| 0.4045E+01 | 0.2299E-02 | 0.2050E+04 |
| 0.4178E+01 | 0.1977E-02 | 0.2050E+04 |
| 0.4312E+01 | 0.1669E-02 | 0.2050E+04 |
| 0.4445E+01 | 0.1216E-02 | 0.2050E+04 |
| 0.4578E+01 | 0.9730E-03 | 0.2050E+04 |
| 0.4711E+01 | 0.8495E-03 | 0.2050E+04 |
| 0.4845E+01 | 0.7456E-03 | 0.2050E+04 |
| 0.4978E+01 | 0.5407E-03 | 0.2050E+04 |
| 0.5111E+01 | 0.4233E-03 | 0.2050E+04 |
| 0.5245E+01 | 0.3591E-03 | 0.2050E+04 |
| 0.5378E+01 | 0.3072E-03 | 0.2050E+04 |



# V1\_Results\_baseline\_IEA.dat

|            |            |            |
|------------|------------|------------|
| 0.5511E+01 | 0.2340E-03 | 0.2050E+04 |
| 0.5645E+01 | 0.1946E-03 | 0.2050E+04 |
| 0.5778E+01 | 0.2527E-03 | 0.2050E+04 |
| 0.5911E+01 | 0.2538E-03 | 0.2050E+04 |
| 0.6044E+01 | 0.1859E-03 | 0.2050E+04 |
| 0.6178E+01 | 0.9954E-04 | 0.2050E+04 |
| 0.6311E+01 | 0.3842E-04 | 0.2050E+04 |
| 0.6444E+01 | 0.1208E-04 | 0.2050E+04 |
| 0.6578E+01 | 0.3070E-04 | 0.2050E+04 |
| 0.6711E+01 | 0.1268E-03 | 0.2050E+04 |
| 0.6844E+01 | 0.1739E-03 | 0.2050E+04 |
| 0.6978E+01 | 0.1237E-03 | 0.2050E+04 |
| 0.7111E+01 | 0.5511E-04 | 0.2050E+04 |
| 0.7244E+01 | 0.2032E-04 | 0.2050E+04 |
| 0.7378E+01 | 0.1622E-04 | 0.2050E+04 |
| 0.7511E+01 | 0.3106E-04 | 0.2050E+04 |
| 0.7644E+01 | 0.4541E-04 | 0.2050E+04 |
| 0.7777E+01 | 0.3223E-04 | 0.2050E+04 |

```

#*****
#*****      AVOIDED CARBON VALUES ($ tr.)      *****
#*****
# Valued at:   1 US$,   Social Carbon Cost,   Tax IEA,   Tax S.S.
              0.1773E+00   0.2345E+01   0.2295E+02   0.1301E+02

```

```

#*****
#*****      CAPOPEX (all; tr. US$): SUMMARY STATISTICS      *****
#*****

```

MEAN, VARIANCE, SKW, KURT & MAX. VALUES 50%, 80%, 90%, 95%

|           |           |           |           |           |           |           |           |
|-----------|-----------|-----------|-----------|-----------|-----------|-----------|-----------|
| 0.127E+02 | 0.251E+01 | 0.523E+00 | 0.354E+01 | 0.125E+02 | 0.139E+02 | 0.147E+02 | 0.154E+02 |
|-----------|-----------|-----------|-----------|-----------|-----------|-----------|-----------|

CapOpStrEx EXPECT. / ( CapOpStrEx > CapOpStrEx max. al 80%, 90%, 95%)

# V1\_Results\_baseline\_IEA.dat

0.1493E+02 0.1558E+02 0.1643E+02

\*\*\*\*\*  
 #\*\*\*\*\* CAPITAL COSTS - AVOIDED CARBON VALUES (US\$ tr.) \*\*\*\*\*  
 #\*\*\*\*\*

# Valued at: 1 US\$, Social Carbon Cost, Tax IEA, Tax S.S.  
 0.1248E+02 0.1031E+02 -0.1029E+02 -0.3530E+00

\*\*\*\*\*  
 #\*\*\*\*\* CAPITAL PRICES (USD/1W) \*\*\*\*\*  
 #\*\*\*\*\*

# MEANS, VARIANCES & MAX. VALUES 50%, 80%, 90%, 95%  
 # ALL YEARS: 2015-2050

|      |           |           |           |           |           |           |
|------|-----------|-----------|-----------|-----------|-----------|-----------|
| 2015 | 0.130E+01 | 0.680E-01 | 0.127E+01 | 0.149E+01 | 0.163E+01 | 0.176E+01 |
| 2016 | 0.126E+01 | 0.619E-01 | 0.123E+01 | 0.145E+01 | 0.158E+01 | 0.170E+01 |
| 2017 | 0.124E+01 | 0.584E-01 | 0.121E+01 | 0.142E+01 | 0.155E+01 | 0.167E+01 |
| 2018 | 0.119E+01 | 0.546E-01 | 0.116E+01 | 0.137E+01 | 0.149E+01 | 0.160E+01 |
| 2019 | 0.113E+01 | 0.512E-01 | 0.110E+01 | 0.130E+01 | 0.142E+01 | 0.153E+01 |
| 2020 | 0.109E+01 | 0.486E-01 | 0.106E+01 | 0.126E+01 | 0.138E+01 | 0.149E+01 |
| 2021 | 0.105E+01 | 0.463E-01 | 0.103E+01 | 0.121E+01 | 0.133E+01 | 0.144E+01 |
| 2022 | 0.102E+01 | 0.434E-01 | 0.997E+00 | 0.118E+01 | 0.129E+01 | 0.139E+01 |
| 2023 | 0.992E+00 | 0.417E-01 | 0.966E+00 | 0.115E+01 | 0.125E+01 | 0.136E+01 |
| 2024 | 0.967E+00 | 0.398E-01 | 0.942E+00 | 0.112E+01 | 0.122E+01 | 0.132E+01 |
| 2025 | 0.949E+00 | 0.380E-01 | 0.924E+00 | 0.110E+01 | 0.120E+01 | 0.130E+01 |
| 2026 | 0.931E+00 | 0.369E-01 | 0.908E+00 | 0.108E+01 | 0.118E+01 | 0.128E+01 |
| 2027 | 0.923E+00 | 0.357E-01 | 0.899E+00 | 0.107E+01 | 0.117E+01 | 0.126E+01 |
| 2028 | 0.905E+00 | 0.345E-01 | 0.884E+00 | 0.105E+01 | 0.115E+01 | 0.124E+01 |
| 2029 | 0.899E+00 | 0.340E-01 | 0.877E+00 | 0.104E+01 | 0.114E+01 | 0.123E+01 |
| 2030 | 0.880E+00 | 0.322E-01 | 0.861E+00 | 0.102E+01 | 0.111E+01 | 0.120E+01 |
| 2031 | 0.814E+00 | 0.303E-01 | 0.793E+00 | 0.945E+00 | 0.104E+01 | 0.113E+01 |

V1\_Results\_baseline\_IEA.dat

|      |           |           |           |           |           |           |
|------|-----------|-----------|-----------|-----------|-----------|-----------|
| 2032 | 0.818E+00 | 0.300E-01 | 0.798E+00 | 0.947E+00 | 0.104E+01 | 0.113E+01 |
| 2033 | 0.822E+00 | 0.296E-01 | 0.802E+00 | 0.954E+00 | 0.104E+01 | 0.113E+01 |
| 2034 | 0.821E+00 | 0.293E-01 | 0.802E+00 | 0.951E+00 | 0.105E+01 | 0.113E+01 |
| 2035 | 0.836E+00 | 0.296E-01 | 0.815E+00 | 0.968E+00 | 0.106E+01 | 0.114E+01 |
| 2036 | 0.835E+00 | 0.293E-01 | 0.813E+00 | 0.966E+00 | 0.106E+01 | 0.114E+01 |
| 2037 | 0.812E+00 | 0.286E-01 | 0.794E+00 | 0.941E+00 | 0.103E+01 | 0.111E+01 |
| 2038 | 0.820E+00 | 0.286E-01 | 0.802E+00 | 0.950E+00 | 0.104E+01 | 0.112E+01 |
| 2039 | 0.824E+00 | 0.287E-01 | 0.806E+00 | 0.952E+00 | 0.104E+01 | 0.113E+01 |
| 2040 | 0.771E+00 | 0.266E-01 | 0.750E+00 | 0.896E+00 | 0.984E+00 | 0.106E+01 |
| 2041 | 0.790E+00 | 0.272E-01 | 0.769E+00 | 0.916E+00 | 0.101E+01 | 0.108E+01 |
| 2042 | 0.824E+00 | 0.286E-01 | 0.804E+00 | 0.955E+00 | 0.105E+01 | 0.112E+01 |
| 2043 | 0.795E+00 | 0.274E-01 | 0.775E+00 | 0.919E+00 | 0.101E+01 | 0.109E+01 |
| 2044 | 0.802E+00 | 0.274E-01 | 0.781E+00 | 0.928E+00 | 0.102E+01 | 0.110E+01 |
| 2045 | 0.742E+00 | 0.251E-01 | 0.722E+00 | 0.862E+00 | 0.947E+00 | 0.103E+01 |
| 2046 | 0.764E+00 | 0.258E-01 | 0.746E+00 | 0.886E+00 | 0.970E+00 | 0.105E+01 |
| 2047 | 0.761E+00 | 0.256E-01 | 0.743E+00 | 0.883E+00 | 0.967E+00 | 0.105E+01 |
| 2048 | 0.750E+00 | 0.253E-01 | 0.733E+00 | 0.871E+00 | 0.956E+00 | 0.103E+01 |
| 2049 | 0.728E+00 | 0.245E-01 | 0.707E+00 | 0.847E+00 | 0.930E+00 | 0.101E+01 |
| 2050 | 0.729E+00 | 0.243E-01 | 0.710E+00 | 0.847E+00 | 0.929E+00 | 0.101E+01 |

#####  
#\*\*\*\*\* TOTAL COSTS USD/W: TIMELINE BREAKDOWN \*\*\*\*\*  
#\*\*\*\*\*  
# PV cap.(Mod+inv) PV BoS PV Str W cap. W BoS W Str

|      |          |          |          |          |          |          |      |
|------|----------|----------|----------|----------|----------|----------|------|
| 2015 | 0.386221 | 0.279606 | 0.122530 | 0.636433 | 0.272757 | 0.127387 | 2015 |
| 2016 | 0.345773 | 0.264161 | 0.113439 | 0.641313 | 0.274848 | 0.126786 |      |
| 2017 | 0.312654 | 0.248113 | 0.104410 | 0.648705 | 0.278017 | 0.126500 |      |
| 2018 | 0.304609 | 0.250636 | 0.103356 | 0.617521 | 0.264652 | 0.118599 |      |
| 2019 | 0.302915 | 0.257944 | 0.104235 | 0.577751 | 0.247607 | 0.109112 |      |
| 2020 | 0.290578 | 0.254939 | 0.100954 | 0.561335 | 0.240572 | 0.104120 | 2020 |
| 2021 | 0.283807 | 0.255859 | 0.099285 | 0.538010 | 0.230576 | 0.097836 |      |
| 2022 | 0.272261 | 0.252208 | 0.095905 | 0.524713 | 0.224877 | 0.093572 |      |
| 2023 | 0.264314 | 0.250127 | 0.093206 | 0.509590 | 0.218396 | 0.088923 |      |
| 2024 | 0.256120 | 0.246814 | 0.090126 | 0.497433 | 0.213186 | 0.084940 |      |

| V1_Results_baseline_IEA.dat |          |          |          |          |          |          |      |
|-----------------------------|----------|----------|----------|----------|----------|----------|------|
| 2025                        | 0.244825 | 0.240372 | 0.086012 | 0.492909 | 0.211247 | 0.082264 | 2025 |
| 2026                        | 0.236580 | 0.235290 | 0.082505 | 0.486064 | 0.208313 | 0.079246 |      |
| 2027                        | 0.224273 | 0.225865 | 0.077611 | 0.489147 | 0.209634 | 0.077868 |      |
| 2028                        | 0.218398 | 0.222314 | 0.074858 | 0.480449 | 0.205907 | 0.074591 |      |
| 2029                        | 0.208232 | 0.213511 | 0.070451 | 0.483822 | 0.207352 | 0.073202 |      |
| 2030                        | 0.203987 | 0.211141 | 0.068272 | 0.473327 | 0.202854 | 0.069811 | 2030 |
| 2031                        | 0.223338 | 0.231874 | 0.073471 | 0.413805 | 0.177345 | 0.059256 |      |
| 2032                        | 0.213707 | 0.221852 | 0.068885 | 0.422832 | 0.181214 | 0.058695 |      |
| 2033                        | 0.204918 | 0.212166 | 0.064556 | 0.432047 | 0.185163 | 0.058077 |      |
| 2034                        | 0.198118 | 0.204981 | 0.061119 | 0.435886 | 0.186808 | 0.056758 |      |
| 2035                        | 0.186765 | 0.191847 | 0.056055 | 0.454225 | 0.194668 | 0.057251 | 2035 |
| 2036                        | 0.182054 | 0.185962 | 0.053245 | 0.456720 | 0.195737 | 0.055667 |      |
| 2037                        | 0.186238 | 0.189086 | 0.053053 | 0.438311 | 0.187847 | 0.051635 |      |
| 2038                        | 0.178643 | 0.180198 | 0.049545 | 0.449134 | 0.192486 | 0.051083 |      |
| 2039                        | 0.172586 | 0.173044 | 0.046624 | 0.455870 | 0.195373 | 0.050102 |      |
| 2040                        | 0.190150 | 0.188665 | 0.049812 | 0.406687 | 0.174294 | 0.043162 | 2040 |
| 2041                        | 0.179278 | 0.176311 | 0.045617 | 0.427408 | 0.183175 | 0.043752 |      |
| 2042                        | 0.163121 | 0.158667 | 0.040228 | 0.462491 | 0.198210 | 0.045675 |      |
| 2043                        | 0.171760 | 0.165169 | 0.041037 | 0.436099 | 0.186900 | 0.041536 |      |
| 2044                        | 0.166227 | 0.158170 | 0.038509 | 0.445021 | 0.190723 | 0.040861 |      |
| 2045                        | 0.186970 | 0.175707 | 0.041920 | 0.388392 | 0.166454 | 0.034372 | 2045 |
| 2046                        | 0.176508 | 0.163532 | 0.038233 | 0.411563 | 0.176384 | 0.035100 |      |
| 2047                        | 0.175347 | 0.160591 | 0.036792 | 0.410173 | 0.175788 | 0.033697 |      |
| 2048                        | 0.177810 | 0.160719 | 0.036083 | 0.400455 | 0.171623 | 0.031673 |      |
| 2049                        | 0.184256 | 0.164321 | 0.036151 | 0.380530 | 0.163084 | 0.028977 |      |
| 2050                        | 0.181800 | 0.160138 | 0.034524 | 0.382703 | 0.164015 | 0.028079 | 2050 |
