# Supplementary material
Source: MDPI journal article supplement (https://www.mdpi.com/1996-1073/12/15/2875)
Supplement: s1 [file s1]

```

                                multiplot_years.txt
# set loadpath 'C:\LF9571\Bin\Aveiro_2019\Plots\multiplot_years'
# load 'multiplot_years.txt'

#
# *****
# *****      MULTIPLY      *****
# *****
#
#pause -1 "Multiplot"
reset
set multiplot

# *****      3D      *****
#
#pause -1 "3D_years"
reset
set size 0.9,0.7
set origin 0.0,0.29
set key outside Left spacing 2 title " \nLegend\n " font "arial,14" box 3
#set key noautotitle
set xrange [25.0:115.0] ; set yrange [2018:2052]
#set border 895 back
set border 63 back
#set xyplane at -0.005
set xyplane at 0
#set view 70,20,,0.7
set view 50,51,,0.9
set grid

splot 'V1_Results_baseline_T_3D_2050.dat' using 1:3:2 t " p.d.f. 2050 (lines) " w l lw 2 lc
rgbcolor "#0000ff" \
      , 'V1_Results_baseline_T_3D_2050_salteado.dat' using 1:3:2 notitle w i lc rgbcolor
"#999999" , 'V1_Results_baseline_T_3D_2040.dat' using 1:3:2 t " p.d.f. 2040 (lines) " w l lw 2
lc rgbcolor "#6400c8" , 'V1_Results_baseline_T_3D_2040_salteado.dat' using 1:3:2 notitle w i
lc rgbcolor "#999999" , 'V1_Results_baseline_T_3D_2030.dat' using 1:3:2 t " p.d.f. 2030
(lines) " w l lw 2 lc rgbcolor "#c80064" , 'V1_Results_baseline_T_3D_2030_salteado.dat' using

```

```

                                multiplot_years.txt
1:3:2 notitle w i lc rgbcolor "#999999" , 'V1_Results_baseline_T_3D_2020.dat' using 1:3:2 t "
p.d.f. 2020 (lines) " w l lw 2 lc rgbcolor "#ff0000" ,
'V1_Results_baseline_T_3D_2020_salteado.dat' using 1:3:2 notitle w i lc rgbcolor "#999999"

unset arrow ; unset label ; unset border ; unset xtics ; unset ytics ; unset grid

# ***** 2D : tops *****
#
#pause -1 "2D_years_tops"
reset
set size 0.45,0.29
set origin 0.0,0.0
set grid
set key outside Left title "Legend" font "arial,12" box 3
set xrange [36.0:70.0] ; set yrange [0.030:0.063]
set xtics (36,40,50,60,70)
set title "A) {/:Italic Top p.d.f. values}." offset -13,0 font "arial,12"
plot 'V1_Results_baseline_T_years.dat' u 2:3 w l lc rgbcolor "#ff0000" t ' p.d.f. 2020' \
    , ' u 4:5 w l lc rgbcolor "#c80064" t ' p.d.f. 2030' \
    , ' u 6:7 w l lc rgbcolor "#6400c8" t ' p.d.f. 2040' \
    , ' u 8:9 w l lc rgbcolor "#0000ff" t ' p.d.f. 2050'

unset arrow ; unset label ; unset border ; unset xtics ; unset ytics ; unset grid

# ***** 2D : tails *****
#
#pause -1 "2D_years_right_tail"
reset
set size 0.45,0.29
set origin 0.50,0.0
set grid
set key outside Left title "Legend" font "arial,12" box 3
set xrange [60.0:70.0] ; set yrange [0.0:0.045]
set title "B) {/:Italic Right tail p.d.f. values}." offset -12,0 font "arial,12"
plot 'V1_Results_baseline_T_years.dat' u 2:3 w l lc rgbcolor "#ff0000" t ' p.d.f. 2020' \
    , ' u 4:5 w l lc rgbcolor "#c80064" t ' p.d.f. 2030' \

```

```
                                multiplot_years.txt
, ' u 6:7 w 1 lc rgbcolor "#6400c8" t ' p.d.f. 2040' \
, ' u 8:9 w 1 lc rgbcolor "#0000ff" t ' p.d.f. 2050'

unset arrow ; unset label ; unset border ; unset xtics ; unset ytics ; unset grid
#
unset multiplot
#
```
