# Supplementary material
Source: MDPI journal article supplement (https://www.mdpi.com/1996-1073/12/15/2875)
Supplement: s1 [file s1]

# V2\_Results\_baseline\_IEA\_delay.dat

# \*\*\* CASO: 1, IEA ; 2, Irena : 1

# \*\*\* Roadmap (1,acelerado; 2,retrasado) : 2

#n° de simulaciones = 100000

# \*\*\*\*\* Parámetros Wind \*\*\*\*\*

#medias ec. precio Turbinas : 2.9666 -0.1860  
 #dev. est. parámetros ec. precio Turbinas : 0.0000 0.0130  
 #dev. est. ec. precio Turbinas : 0.0900  
 #valor inicial en 2014 de Cap 340.6110  
 #depreciación, Performance Ratio, kgCO2 0.984 1.000 0.780  
 #Life Span de los Turbinas 27  
 #Social Discount Rate 0.022500 0.019286  
 #WACC, Loan Maturity 0.050 15  
 #Generación aleatoria de los parámetros = T  
 #Generación aleatoria de los errs. de las ecs. = T  
 #Storage costs tenido en cuenta = T  
 #Modelo Precio Turbinas (1, old; 2, simple; 3, LR dec.; 4, LR +dec. 2

# \*\*\*\*\* Parámetros PV \*\*\*\*\*

#medias ec. precio módulos : 3.6025 -0.3200  
 #dev. est. parámetros ec. precio módulos : 0.1710 0.0240  
 #dev. est. ec. precio módulos : 0.3300  
 #valores iniciales en 2014 de Cap, Pe, Pm, Ps, upm : 157.7609 0.8229 0.7050  
 0.0760 0.0000  
 #depreciación, Performance Ratio, kgCO2 : 0.990 0.850 0.780  
 #Life Span de los módulos : 30  
 #Social Discount Rate : 0.022500 0.019286  
 #WACC, Loan Maturity : 0.090 7  
 #Generación aleatoria de los parámetros = T  
 #Generación aleatoria de los errs. de las ecs. = T  
 #Storage costs tenido en cuenta = T

#Modelo Precio módulos (1, old; 2, simple; 3, LR dec.; 4, LR +dec. : 2

\*\*\*\*\*  
 \*\*\*\*\* ENERGY GENERATED \*\*\*\*\*  
 \*\*\*\*\*

Total, PV, Wind: 0.17375E+12 0.81610E+11 0.92141E+11  
 PV(%), Wind(%): 0.469694 0.530306

#\*\*\*\*\*  
 #\*\*\*\*\* ANNUAL LCE (means; US \$ per Mwh.) \*\*\*\*\*  
 #\*\*\*\*\*  
 #

|      | Total       | PV          | Wind        |
|------|-------------|-------------|-------------|
| 2015 | 0.83565E+02 | 0.83928E+02 | 0.83304E+02 |
| 2016 | 0.13075E+03 | 0.10869E+03 | 0.13307E+03 |
| 2017 | 0.12124E+03 | 0.11139E+03 | 0.12217E+03 |
| 2018 | 0.13697E+03 | 0.10613E+03 | 0.14004E+03 |
| 2019 | 0.12849E+03 | 0.10620E+03 | 0.13039E+03 |
| 2020 | 0.11306E+03 | 0.11330E+03 | 0.11304E+03 |
| 2021 | 0.14554E+03 | 0.12079E+03 | 0.14737E+03 |
| 2022 | 0.10116E+03 | 0.13106E+03 | 0.10019E+03 |
| 2023 | 0.10340E+03 | 0.14636E+03 | 0.10199E+03 |
| 2024 | 0.10356E+03 | 0.17382E+03 | 0.10134E+03 |
| 2025 | 0.93541E+02 | 0.18288E+03 | 0.91635E+02 |
| 2026 | 0.94624E+02 | 0.20168E+03 | 0.92535E+02 |
| 2027 | 0.98667E+02 | 0.21204E+03 | 0.95663E+02 |
| 2028 | 0.89221E+02 | 0.27603E+03 | 0.86393E+02 |
| 2029 | 0.96275E+02 | 0.28832E+03 | 0.92318E+02 |
| 2030 | 0.94802E+02 | 0.39325E+03 | 0.87099E+02 |
| 2031 | 0.66492E+02 | 0.59196E+02 | 0.73161E+02 |
| 2032 | 0.62928E+02 | 0.54903E+02 | 0.70192E+02 |
| 2033 | 0.60156E+02 | 0.51985E+02 | 0.67375E+02 |
| 2034 | 0.58101E+02 | 0.49504E+02 | 0.65538E+02 |

# V2\_Results\_baseline\_IEA\_delay.dat

|      |             |             |             |
|------|-------------|-------------|-------------|
| 2035 | 0.56952E+02 | 0.48380E+02 | 0.64158E+02 |
| 2036 | 0.54048E+02 | 0.45061E+02 | 0.61177E+02 |
| 2037 | 0.52533E+02 | 0.43525E+02 | 0.59898E+02 |
| 2038 | 0.51347E+02 | 0.42110E+02 | 0.58638E+02 |
| 2039 | 0.50191E+02 | 0.40791E+02 | 0.57435E+02 |
| 2040 | 0.48608E+02 | 0.39531E+02 | 0.56547E+02 |
| 2041 | 0.47763E+02 | 0.38374E+02 | 0.55494E+02 |
| 2042 | 0.47221E+02 | 0.37373E+02 | 0.54375E+02 |
| 2043 | 0.44720E+02 | 0.36371E+02 | 0.54311E+02 |
| 2044 | 0.43843E+02 | 0.35467E+02 | 0.53507E+02 |
| 2045 | 0.43344E+02 | 0.35192E+02 | 0.54500E+02 |
| 2046 | 0.44758E+02 | 0.35270E+02 | 0.53943E+02 |
| 2047 | 0.44156E+02 | 0.34580E+02 | 0.53417E+02 |
| 2048 | 0.43614E+02 | 0.33958E+02 | 0.52953E+02 |
| 2049 | 0.43147E+02 | 0.33370E+02 | 0.52552E+02 |
| 2050 | 0.42599E+02 | 0.32863E+02 | 0.51962E+02 |

#####  
#\*\*\*\*\* TOTAL, PV & WIND, LCE (US\$/MWh): SUMMARY STATISTICS \*\*\*\*\*  
#\*\*\*\*\*

\*\*\*\*\* Wind \*\*\*\*\*

MEAN, VARIANCE, SKW, KURT & MAX. VALUES 50%, 80%, 90%, 95%

0.606E+02 0.116E+03 0.569E+00 0.362E+01 0.595E+02 0.690E+02 0.746E+02 0.796E+02

LCE EXPECT. / ( LCE > LCE max. at 80%, 90%, 95%)

0.7701E+02 0.8213E+02 0.8673E+02

\*\*\*\*\* PV \*\*\*\*\*

# V2\_Results\_baseline\_IEA\_delay.dat

MEAN, VARIANCE, SKW, KURT & MAX. VALUES 50%, 80%, 90%, 95%

0.433E+02 0.654E+02 0.124E+01 0.578E+01 0.417E+02 0.489E+02 0.537E+02 0.584E+02

LCE EXPECT. / ( LCE > LCE max. al 80%, 90%, 95%)

0.5560E+02 0.6069E+02 0.6458E+02

\*\*\*\*\* Total \*\*\*\*\*

MEAN, VARIANCE, SKW, KURT & MAX. VALUES 50%, 80%, 90%, 95%

0.524E+02 0.471E+02 0.530E+00 0.356E+01 0.518E+02 0.579E+02 0.614E+02 0.645E+02

LCE EXPECT. / ( LCE > LCE max. al 80%, 90%, 95%)

0.6197E+02 0.6602E+02 0.6863E+02

#\*\*\*\*\*  
#\*\*\*\*\* TOTAL LCE (US\$/MWh): SUMMARY STATISTICS; ALL YEARS: 2015 - 2050 \*\*\*\*\*  
#\*\*\*\*\*

# MEAN, VARIANCE, SKW, KURT, INT: 2.5%, 50%, 80%, 90%, 95%, 97.5%

|   |           |           |           |           |           |           |           |           |
|---|-----------|-----------|-----------|-----------|-----------|-----------|-----------|-----------|
| 1 | 0.836E+02 | 0.142E+03 | 0.748E+00 | 0.430E+01 | 0.638E+02 | 0.823E+02 | 0.928E+02 | 0.991E+02 |
|   | 0.105E+03 | 0.110E+03 |           |           |           |           |           |           |
| 2 | 0.131E+03 | 0.180E+03 | 0.571E+00 | 0.361E+01 | 0.108E+03 | 0.129E+03 | 0.141E+03 | 0.148E+03 |
|   | 0.154E+03 | 0.160E+03 |           |           |           |           |           |           |
| 3 | 0.121E+03 | 0.181E+03 | 0.581E+00 | 0.364E+01 | 0.983E+02 | 0.120E+03 | 0.132E+03 | 0.139E+03 |
|   | 0.145E+03 | 0.151E+03 |           |           |           |           |           |           |
| 4 | 0.137E+03 | 0.178E+03 | 0.570E+00 | 0.359E+01 | 0.114E+03 | 0.136E+03 | 0.148E+03 | 0.154E+03 |

V2\_Results\_baseline\_IEA\_delay.dat

|           |           |           |           |           |           |           |           |           |  |
|-----------|-----------|-----------|-----------|-----------|-----------|-----------|-----------|-----------|--|
| 0.161E+03 | 0.166E+03 |           |           |           |           |           |           |           |  |
| 5         | 0.128E+03 | 0.180E+03 | 0.575E+00 | 0.361E+01 | 0.106E+03 | 0.127E+03 | 0.139E+03 | 0.146E+03 |  |
| 0.152E+03 | 0.158E+03 |           |           |           |           |           |           |           |  |
| 6         | 0.113E+03 | 0.184E+03 | 0.574E+00 | 0.361E+01 | 0.899E+02 | 0.112E+03 | 0.124E+03 | 0.131E+03 |  |
| 0.137E+03 | 0.143E+03 |           |           |           |           |           |           |           |  |
| 7         | 0.146E+03 | 0.181E+03 | 0.581E+00 | 0.366E+01 | 0.123E+03 | 0.144E+03 | 0.156E+03 | 0.163E+03 |  |
| 0.169E+03 | 0.175E+03 |           |           |           |           |           |           |           |  |
| 8         | 0.101E+03 | 0.193E+03 | 0.585E+00 | 0.365E+01 | 0.776E+02 | 0.998E+02 | 0.112E+03 | 0.119E+03 |  |
| 0.126E+03 | 0.132E+03 |           |           |           |           |           |           |           |  |
| 9         | 0.103E+03 | 0.192E+03 | 0.587E+00 | 0.364E+01 | 0.800E+02 | 0.102E+03 | 0.114E+03 | 0.122E+03 |  |
| 0.128E+03 | 0.134E+03 |           |           |           |           |           |           |           |  |
| 10        | 0.104E+03 | 0.192E+03 | 0.599E+00 | 0.368E+01 | 0.801E+02 | 0.102E+03 | 0.114E+03 | 0.122E+03 |  |
| 0.128E+03 | 0.134E+03 |           |           |           |           |           |           |           |  |
| 11        | 0.935E+02 | 0.193E+03 | 0.576E+00 | 0.361E+01 | 0.700E+02 | 0.922E+02 | 0.105E+03 | 0.112E+03 |  |
| 0.118E+03 | 0.124E+03 |           |           |           |           |           |           |           |  |
| 12        | 0.946E+02 | 0.194E+03 | 0.582E+00 | 0.359E+01 | 0.710E+02 | 0.933E+02 | 0.106E+03 | 0.113E+03 |  |
| 0.120E+03 | 0.125E+03 |           |           |           |           |           |           |           |  |
| 13        | 0.987E+02 | 0.190E+03 | 0.587E+00 | 0.365E+01 | 0.751E+02 | 0.973E+02 | 0.110E+03 | 0.117E+03 |  |
| 0.123E+03 | 0.129E+03 |           |           |           |           |           |           |           |  |
| 14        | 0.892E+02 | 0.194E+03 | 0.591E+00 | 0.366E+01 | 0.656E+02 | 0.878E+02 | 0.100E+03 | 0.107E+03 |  |
| 0.114E+03 | 0.120E+03 |           |           |           |           |           |           |           |  |
| 15        | 0.963E+02 | 0.192E+03 | 0.606E+00 | 0.373E+01 | 0.729E+02 | 0.948E+02 | 0.107E+03 | 0.114E+03 |  |
| 0.121E+03 | 0.127E+03 |           |           |           |           |           |           |           |  |
| 16        | 0.948E+02 | 0.187E+03 | 0.583E+00 | 0.364E+01 | 0.715E+02 | 0.933E+02 | 0.106E+03 | 0.113E+03 |  |
| 0.119E+03 | 0.125E+03 |           |           |           |           |           |           |           |  |
| 17        | 0.665E+02 | 0.105E+03 | 0.811E+00 | 0.447E+01 | 0.498E+02 | 0.652E+02 | 0.743E+02 | 0.798E+02 |  |
| 0.847E+02 | 0.897E+02 |           |           |           |           |           |           |           |  |
| 18        | 0.629E+02 | 0.921E+02 | 0.779E+00 | 0.442E+01 | 0.472E+02 | 0.617E+02 | 0.701E+02 | 0.753E+02 |  |
| 0.802E+02 | 0.847E+02 |           |           |           |           |           |           |           |  |
| 19        | 0.602E+02 | 0.836E+02 | 0.746E+00 | 0.427E+01 | 0.451E+02 | 0.590E+02 | 0.672E+02 | 0.719E+02 |  |
| 0.765E+02 | 0.807E+02 |           |           |           |           |           |           |           |  |
| 20        | 0.581E+02 | 0.774E+02 | 0.706E+00 | 0.406E+01 | 0.434E+02 | 0.571E+02 | 0.648E+02 | 0.696E+02 |  |
| 0.739E+02 | 0.778E+02 |           |           |           |           |           |           |           |  |
| 21        | 0.570E+02 | 0.732E+02 | 0.712E+00 | 0.417E+01 | 0.427E+02 | 0.560E+02 | 0.635E+02 | 0.681E+02 |  |
| 0.721E+02 | 0.760E+02 |           |           |           |           |           |           |           |  |
| 22        | 0.540E+02 | 0.699E+02 | 0.667E+00 | 0.393E+01 | 0.401E+02 | 0.531E+02 | 0.606E+02 | 0.650E+02 |  |

# V2\_Results\_baseline\_IEA\_delay.dat

|           |           |           |           |           |           |           |           |           |  |
|-----------|-----------|-----------|-----------|-----------|-----------|-----------|-----------|-----------|--|
| 0.690E+02 | 0.726E+02 |           |           |           |           |           |           |           |  |
| 23        | 0.525E+02 | 0.669E+02 | 0.711E+00 | 0.422E+01 | 0.389E+02 | 0.515E+02 | 0.587E+02 | 0.631E+02 |  |
| 0.670E+02 | 0.707E+02 |           |           |           |           |           |           |           |  |
| 24        | 0.513E+02 | 0.645E+02 | 0.655E+00 | 0.387E+01 | 0.378E+02 | 0.505E+02 | 0.575E+02 | 0.617E+02 |  |
| 0.656E+02 | 0.693E+02 |           |           |           |           |           |           |           |  |
| 25        | 0.502E+02 | 0.624E+02 | 0.660E+00 | 0.388E+01 | 0.369E+02 | 0.494E+02 | 0.563E+02 | 0.604E+02 |  |
| 0.642E+02 | 0.679E+02 |           |           |           |           |           |           |           |  |
| 26        | 0.486E+02 | 0.585E+02 | 0.701E+00 | 0.404E+01 | 0.359E+02 | 0.478E+02 | 0.544E+02 | 0.585E+02 |  |
| 0.621E+02 | 0.657E+02 |           |           |           |           |           |           |           |  |
| 27        | 0.478E+02 | 0.575E+02 | 0.672E+00 | 0.396E+01 | 0.352E+02 | 0.470E+02 | 0.537E+02 | 0.577E+02 |  |
| 0.613E+02 | 0.646E+02 |           |           |           |           |           |           |           |  |
| 28        | 0.472E+02 | 0.579E+02 | 0.646E+00 | 0.385E+01 | 0.344E+02 | 0.464E+02 | 0.531E+02 | 0.571E+02 |  |
| 0.608E+02 | 0.640E+02 |           |           |           |           |           |           |           |  |
| 29        | 0.447E+02 | 0.510E+02 | 0.872E+00 | 0.509E+01 | 0.332E+02 | 0.438E+02 | 0.501E+02 | 0.540E+02 |  |
| 0.575E+02 | 0.607E+02 |           |           |           |           |           |           |           |  |
| 30        | 0.438E+02 | 0.489E+02 | 0.838E+00 | 0.470E+01 | 0.325E+02 | 0.429E+02 | 0.491E+02 | 0.529E+02 |  |
| 0.563E+02 | 0.597E+02 |           |           |           |           |           |           |           |  |
| 31        | 0.433E+02 | 0.494E+02 | 0.911E+00 | 0.487E+01 | 0.321E+02 | 0.424E+02 | 0.486E+02 | 0.523E+02 |  |
| 0.559E+02 | 0.595E+02 |           |           |           |           |           |           |           |  |
| 32        | 0.448E+02 | 0.511E+02 | 0.745E+00 | 0.441E+01 | 0.329E+02 | 0.439E+02 | 0.503E+02 | 0.540E+02 |  |
| 0.573E+02 | 0.607E+02 |           |           |           |           |           |           |           |  |
| 33        | 0.442E+02 | 0.501E+02 | 0.733E+00 | 0.418E+01 | 0.324E+02 | 0.433E+02 | 0.496E+02 | 0.533E+02 |  |
| 0.567E+02 | 0.600E+02 |           |           |           |           |           |           |           |  |
| 34        | 0.436E+02 | 0.494E+02 | 0.735E+00 | 0.421E+01 | 0.320E+02 | 0.428E+02 | 0.490E+02 | 0.527E+02 |  |
| 0.561E+02 | 0.594E+02 |           |           |           |           |           |           |           |  |
| 35        | 0.431E+02 | 0.487E+02 | 0.734E+00 | 0.421E+01 | 0.316E+02 | 0.423E+02 | 0.485E+02 | 0.522E+02 |  |
| 0.555E+02 | 0.587E+02 |           |           |           |           |           |           |           |  |
| 36        | 0.426E+02 | 0.476E+02 | 0.726E+00 | 0.417E+01 | 0.312E+02 | 0.418E+02 | 0.479E+02 | 0.515E+02 |  |
| 0.549E+02 | 0.580E+02 |           |           |           |           |           |           |           |  |

```

#*****
# p.d.f. & C.d.f LCE (US$/MWh): TOTAL, PV, WIND (Smoothed, NOT standardised)
#*****
#
#           Total           PV           Wind

```

V2\_Results\_baseline\_IEA\_delay.dat

```
# ***** NOT standardised *****

-200 0.2952E+02 0.5877E-05 0.1002E-05 0.1352E+00 0.7794E-05 0.2108E-05 0.2795E+02
0.1110E-04 0.2859E-05
-195 0.3037E+02 0.1226E-04 0.8595E-05 0.1487E+01 0.3108E-05 0.9689E-05 0.2924E+02
0.2433E-04 0.2513E-04
-190 0.3122E+02 0.3748E-04 0.3278E-04 0.2839E+01 0.0000E+00 0.1002E-04 0.3053E+02
0.6192E-04 0.8329E-04
-185 0.3207E+02 0.5457E-04 0.7363E-04 0.4191E+01 0.0000E+00 0.1002E-04 0.3182E+02
0.1344E-03 0.2141E-03
-180 0.3293E+02 0.9863E-04 0.1387E-03 0.5543E+01 0.0000E+00 0.1002E-04 0.3311E+02
0.3063E-03 0.5061E-03
-175 0.3378E+02 0.1960E-03 0.2654E-03 0.6896E+01 0.0000E+00 0.1002E-04 0.3439E+02
0.5664E-03 0.1094E-02
-170 0.3463E+02 0.4289E-03 0.5450E-03 0.8248E+01 0.0000E+00 0.1002E-04 0.3568E+02
0.9816E-03 0.2128E-02
-165 0.3548E+02 0.7651E-03 0.1075E-02 0.9600E+01 0.0000E+00 0.1002E-04 0.3697E+02
0.1608E-02 0.3844E-02
-160 0.3634E+02 0.1376E-02 0.2017E-02 0.1095E+02 0.0000E+00 0.1002E-04 0.3826E+02
0.2532E-02 0.6596E-02
-155 0.3719E+02 0.2407E-02 0.3686E-02 0.1230E+02 0.0000E+00 0.1002E-04 0.3955E+02
0.3838E-02 0.1083E-01
-150 0.3804E+02 0.3906E-02 0.6459E-02 0.1366E+02 0.0000E+00 0.1002E-04 0.4083E+02
0.5505E-02 0.1703E-01
-145 0.3889E+02 0.5936E-02 0.1080E-01 0.1501E+02 0.0000E+00 0.1002E-04 0.4212E+02
0.7674E-02 0.2574E-01
-140 0.3975E+02 0.8449E-02 0.1712E-01 0.1636E+02 0.0000E+00 0.1002E-04 0.4341E+02
0.1016E-01 0.3751E-01
-135 0.4060E+02 0.1177E-01 0.2595E-01 0.1771E+02 0.0000E+00 0.1002E-04 0.4470E+02
0.1316E-01 0.5286E-01
-130 0.4145E+02 0.1596E-01 0.3804E-01 0.1906E+02 0.0000E+00 0.1002E-04 0.4599E+02
0.1654E-01 0.7239E-01
-125 0.4230E+02 0.2111E-01 0.5424E-01 0.2042E+02 0.0000E+00 0.1002E-04 0.4727E+02
0.2037E-01 0.9663E-01
-120 0.4316E+02 0.2624E-01 0.7489E-01 0.2177E+02 0.0000E+00 0.1002E-04 0.4856E+02
0.2411E-01 0.1258E+00
```

# V2\_Results\_baseline IEA\_delay.dat

|            |            |            |            |            |            |            |            |
|------------|------------|------------|------------|------------|------------|------------|------------|
| -115       | 0.4401E+02 | 0.3160E-01 | 0.9995E-01 | 0.2312E+02 | 0.0000E+00 | 0.1002E-04 | 0.4985E+02 |
| 0.2754E-01 | 0.1595E+00 |            |            |            |            |            |            |
| -110       | 0.4486E+02 | 0.3723E-01 | 0.1297E+00 | 0.2447E+02 | 0.0000E+00 | 0.1002E-04 | 0.5114E+02 |
| 0.3052E-01 | 0.1974E+00 |            |            |            |            |            |            |
| -105       | 0.4571E+02 | 0.4308E-01 | 0.1645E+00 | 0.2582E+02 | 0.3723E-04 | 0.2747E-04 | 0.5243E+02 |
| 0.3314E-01 | 0.2387E+00 |            |            |            |            |            |            |
| -100       | 0.4657E+02 | 0.4822E-01 | 0.2039E+00 | 0.2718E+02 | 0.3289E-03 | 0.2704E-03 | 0.5371E+02 |
| 0.3507E-01 | 0.2830E+00 |            |            |            |            |            |            |
| -95        | 0.4742E+02 | 0.5206E-01 | 0.2471E+00 | 0.2853E+02 | 0.1754E-02 | 0.1642E-02 | 0.5500E+02 |
| 0.3630E-01 | 0.3291E+00 |            |            |            |            |            |            |
| -90        | 0.4827E+02 | 0.5498E-01 | 0.2930E+00 | 0.2988E+02 | 0.5904E-02 | 0.7034E-02 | 0.5629E+02 |
| 0.3755E-01 | 0.3769E+00 |            |            |            |            |            |            |
| -85        | 0.4912E+02 | 0.5751E-01 | 0.3412E+00 | 0.3123E+02 | 0.1327E-01 | 0.2065E-01 | 0.5758E+02 |
| 0.3846E-01 | 0.4260E+00 |            |            |            |            |            |            |
| -80        | 0.4998E+02 | 0.5927E-01 | 0.3912E+00 | 0.3258E+02 | 0.2361E-01 | 0.4671E-01 | 0.5887E+02 |
| 0.3857E-01 | 0.4757E+00 |            |            |            |            |            |            |
| -75        | 0.5083E+02 | 0.5972E-01 | 0.4420E+00 | 0.3394E+02 | 0.3483E-01 | 0.8780E-01 | 0.6015E+02 |
| 0.3744E-01 | 0.5246E+00 |            |            |            |            |            |            |
| -70        | 0.5168E+02 | 0.5937E-01 | 0.4928E+00 | 0.3529E+02 | 0.4503E-01 | 0.1433E+00 | 0.6144E+02 |
| 0.3609E-01 | 0.5718E+00 |            |            |            |            |            |            |
| -65        | 0.5253E+02 | 0.5809E-01 | 0.5428E+00 | 0.3664E+02 | 0.5327E-01 | 0.2112E+00 | 0.6273E+02 |
| 0.3450E-01 | 0.6171E+00 |            |            |            |            |            |            |
| -60        | 0.5339E+02 | 0.5577E-01 | 0.5912E+00 | 0.3799E+02 | 0.5765E-01 | 0.2873E+00 | 0.6402E+02 |
| 0.3246E-01 | 0.6600E+00 |            |            |            |            |            |            |
| -55        | 0.5424E+02 | 0.5230E-01 | 0.6370E+00 | 0.3935E+02 | 0.5826E-01 | 0.3660E+00 | 0.6531E+02 |
| 0.2994E-01 | 0.6999E+00 |            |            |            |            |            |            |
| -50        | 0.5509E+02 | 0.4884E-01 | 0.6798E+00 | 0.4070E+02 | 0.5673E-01 | 0.4438E+00 | 0.6659E+02 |
| 0.2747E-01 | 0.7365E+00 |            |            |            |            |            |            |
| -45        | 0.5594E+02 | 0.4538E-01 | 0.7197E+00 | 0.4205E+02 | 0.5367E-01 | 0.5182E+00 | 0.6788E+02 |
| 0.2531E-01 | 0.7702E+00 |            |            |            |            |            |            |
| -40        | 0.5680E+02 | 0.4208E-01 | 0.7567E+00 | 0.4340E+02 | 0.4928E-01 | 0.5873E+00 | 0.6917E+02 |
| 0.2305E-01 | 0.8010E+00 |            |            |            |            |            |            |
| -35        | 0.5765E+02 | 0.3841E-01 | 0.7907E+00 | 0.4475E+02 | 0.4455E-01 | 0.6502E+00 | 0.7046E+02 |
| 0.2070E-01 | 0.8289E+00 |            |            |            |            |            |            |
| -30        | 0.5850E+02 | 0.3444E-01 | 0.8214E+00 | 0.4611E+02 | 0.3940E-01 | 0.7062E+00 | 0.7175E+02 |
| 0.1826E-01 | 0.8537E+00 |            |            |            |            |            |            |



|            |            |            | V2_Results_baseline_IEA_delay.dat |            |            |            |            |  |
|------------|------------|------------|-----------------------------------|------------|------------|------------|------------|--|
| -25        | 0.5935E+02 | 0.3037E-01 | 0.8487E+00                        | 0.4746E+02 | 0.3404E-01 | 0.7553E+00 | 0.7303E+02 |  |
| 0.1604E-01 | 0.8755E+00 |            |                                   |            |            |            |            |  |
| -20        | 0.6021E+02 | 0.2618E-01 | 0.8724E+00                        | 0.4881E+02 | 0.2884E-01 | 0.7970E+00 | 0.7432E+02 |  |
| 0.1393E-01 | 0.8945E+00 |            |                                   |            |            |            |            |  |
| -15        | 0.6106E+02 | 0.2248E-01 | 0.8928E+00                        | 0.5016E+02 | 0.2410E-01 | 0.8320E+00 | 0.7561E+02 |  |
| 0.1217E-01 | 0.9110E+00 |            |                                   |            |            |            |            |  |
| -10        | 0.6191E+02 | 0.1945E-01 | 0.9104E+00                        | 0.5151E+02 | 0.2032E-01 | 0.8615E+00 | 0.7690E+02 |  |
| 0.1059E-01 | 0.9255E+00 |            |                                   |            |            |            |            |  |
| -5         | 0.6276E+02 | 0.1671E-01 | 0.9256E+00                        | 0.5287E+02 | 0.1727E-01 | 0.8865E+00 | 0.7819E+02 |  |
| 0.9066E-02 | 0.9379E+00 |            |                                   |            |            |            |            |  |
| 0          | 0.6362E+02 | 0.1397E-01 | 0.9384E+00                        | 0.5422E+02 | 0.1412E-01 | 0.9072E+00 | 0.7947E+02 |  |
| 0.7565E-02 | 0.9484E+00 |            |                                   |            |            |            |            |  |
| 5          | 0.6447E+02 | 0.1161E-01 | 0.9491E+00                        | 0.5557E+02 | 0.1136E-01 | 0.9239E+00 | 0.8076E+02 |  |
| 0.6222E-02 | 0.9571E+00 |            |                                   |            |            |            |            |  |
| 10         | 0.6532E+02 | 0.9904E-02 | 0.9581E+00                        | 0.5692E+02 | 0.9581E-02 | 0.9378E+00 | 0.8205E+02 |  |
| 0.5267E-02 | 0.9643E+00 |            |                                   |            |            |            |            |  |
| 15         | 0.6617E+02 | 0.8455E-02 | 0.9658E+00                        | 0.5827E+02 | 0.8060E-02 | 0.9495E+00 | 0.8334E+02 |  |
| 0.4522E-02 | 0.9705E+00 |            |                                   |            |            |            |            |  |
| 20         | 0.6703E+02 | 0.6997E-02 | 0.9722E+00                        | 0.5963E+02 | 0.6519E-02 | 0.9591E+00 | 0.8463E+02 |  |
| 0.3852E-02 | 0.9758E+00 |            |                                   |            |            |            |            |  |
| 25         | 0.6788E+02 | 0.5654E-02 | 0.9775E+00                        | 0.6098E+02 | 0.5167E-02 | 0.9668E+00 | 0.8591E+02 |  |
| 0.3164E-02 | 0.9803E+00 |            |                                   |            |            |            |            |  |
| 30         | 0.6873E+02 | 0.4611E-02 | 0.9817E+00                        | 0.6233E+02 | 0.4217E-02 | 0.9729E+00 | 0.8720E+02 |  |
| 0.2568E-02 | 0.9839E+00 |            |                                   |            |            |            |            |  |
| 35         | 0.6958E+02 | 0.3810E-02 | 0.9853E+00                        | 0.6368E+02 | 0.3453E-02 | 0.9780E+00 | 0.8849E+02 |  |
| 0.2135E-02 | 0.9868E+00 |            |                                   |            |            |            |            |  |
| 40         | 0.7044E+02 | 0.3107E-02 | 0.9881E+00                        | 0.6503E+02 | 0.2760E-02 | 0.9821E+00 | 0.8978E+02 |  |
| 0.1788E-02 | 0.9893E+00 |            |                                   |            |            |            |            |  |
| 45         | 0.7129E+02 | 0.2526E-02 | 0.9905E+00                        | 0.6639E+02 | 0.2214E-02 | 0.9854E+00 | 0.9107E+02 |  |
| 0.1465E-02 | 0.9914E+00 |            |                                   |            |            |            |            |  |
| 50         | 0.7214E+02 | 0.2066E-02 | 0.9924E+00                        | 0.6774E+02 | 0.1737E-02 | 0.9880E+00 | 0.9235E+02 |  |
| 0.1146E-02 | 0.9930E+00 |            |                                   |            |            |            |            |  |
| 55         | 0.7299E+02 | 0.1709E-02 | 0.9940E+00                        | 0.6909E+02 | 0.1493E-02 | 0.9901E+00 | 0.9364E+02 |  |
| 0.8974E-03 | 0.9943E+00 |            |                                   |            |            |            |            |  |
| 60         | 0.7385E+02 | 0.1375E-02 | 0.9953E+00                        | 0.7044E+02 | 0.1344E-02 | 0.9920E+00 | 0.9493E+02 |  |
| 0.7456E-03 | 0.9953E+00 |            |                                   |            |            |            |            |  |

|     |                       | V2_Results_baseline IEA_delay.dat |            |            |            |            |  |  |
|-----|-----------------------|-----------------------------------|------------|------------|------------|------------|--|--|
| 65  | 0.7470E+02 0.1076E-02 | 0.9963E+00                        | 0.7179E+02 | 0.1101E-02 | 0.9936E+00 | 0.9622E+02 |  |  |
|     | 0.6503E-03 0.9962E+00 |                                   |            |            |            |            |  |  |
| 70  | 0.7555E+02 0.8737E-03 | 0.9971E+00                        | 0.7315E+02 | 0.8408E-03 | 0.9949E+00 | 0.9750E+02 |  |  |
|     | 0.5482E-03 0.9970E+00 |                                   |            |            |            |            |  |  |
| 75  | 0.7640E+02 0.6983E-03 | 0.9977E+00                        | 0.7450E+02 | 0.6364E-03 | 0.9959E+00 | 0.9879E+02 |  |  |
|     | 0.4700E-03 0.9976E+00 |                                   |            |            |            |            |  |  |
| 80  | 0.7726E+02 0.4995E-03 | 0.9982E+00                        | 0.7585E+02 | 0.4847E-03 | 0.9966E+00 | 0.1001E+03 |  |  |
|     | 0.3820E-03 0.9981E+00 |                                   |            |            |            |            |  |  |
| 85  | 0.7811E+02 0.3872E-03 | 0.9986E+00                        | 0.7720E+02 | 0.4262E-03 | 0.9972E+00 | 0.1014E+03 |  |  |
|     | 0.2988E-03 0.9986E+00 |                                   |            |            |            |            |  |  |
| 90  | 0.7896E+02 0.3283E-03 | 0.9989E+00                        | 0.7856E+02 | 0.3615E-03 | 0.9977E+00 | 0.1027E+03 |  |  |
|     | 0.2136E-03 0.9989E+00 |                                   |            |            |            |            |  |  |
| 95  | 0.7981E+02 0.2674E-03 | 0.9991E+00                        | 0.7991E+02 | 0.2788E-03 | 0.9982E+00 | 0.1039E+03 |  |  |
|     | 0.1767E-03 0.9991E+00 |                                   |            |            |            |            |  |  |
| 100 | 0.8067E+02 0.1851E-03 | 0.9993E+00                        | 0.8126E+02 | 0.2530E-03 | 0.9985E+00 | 0.1052E+03 |  |  |
|     | 0.1304E-03 0.9993E+00 |                                   |            |            |            |            |  |  |
| 105 | 0.8152E+02 0.1433E-03 | 0.9995E+00                        | 0.8261E+02 | 0.1940E-03 | 0.9988E+00 | 0.1065E+03 |  |  |
|     | 0.8678E-04 0.9995E+00 |                                   |            |            |            |            |  |  |
| 110 | 0.8237E+02 0.1226E-03 | 0.9996E+00                        | 0.8396E+02 | 0.1175E-03 | 0.9990E+00 | 0.1078E+03 |  |  |
|     | 0.6111E-04 0.9995E+00 |                                   |            |            |            |            |  |  |
| 115 | 0.8322E+02 0.9066E-04 | 0.9997E+00                        | 0.8532E+02 | 0.1050E-03 | 0.9991E+00 | 0.1091E+03 |  |  |
|     | 0.6096E-04 0.9996E+00 |                                   |            |            |            |            |  |  |
| 120 | 0.8408E+02 0.5993E-04 | 0.9997E+00                        | 0.8667E+02 | 0.1015E-03 | 0.9993E+00 | 0.1104E+03 |  |  |
|     | 0.5629E-04 0.9997E+00 |                                   |            |            |            |            |  |  |
| 125 | 0.8493E+02 0.4415E-04 | 0.9998E+00                        | 0.8802E+02 | 0.8535E-04 | 0.9994E+00 | 0.1117E+03 |  |  |
|     | 0.4262E-04 0.9998E+00 |                                   |            |            |            |            |  |  |
| 130 | 0.8578E+02 0.4185E-04 | 0.9998E+00                        | 0.8937E+02 | 0.8333E-04 | 0.9995E+00 | 0.1130E+03 |  |  |
|     | 0.3026E-04 0.9998E+00 |                                   |            |            |            |            |  |  |
| 135 | 0.8663E+02 0.4528E-04 | 0.9998E+00                        | 0.9072E+02 | 0.6586E-04 | 0.9996E+00 | 0.1142E+03 |  |  |
|     | 0.1783E-04 0.9998E+00 |                                   |            |            |            |            |  |  |
| 140 | 0.8749E+02 0.3736E-04 | 0.9999E+00                        | 0.9208E+02 | 0.4867E-04 | 0.9997E+00 | 0.1155E+03 |  |  |
|     | 0.1278E-04 0.9999E+00 |                                   |            |            |            |            |  |  |
| 145 | 0.8834E+02 0.2580E-04 | 0.9999E+00                        | 0.9343E+02 | 0.4030E-04 | 0.9998E+00 | 0.1168E+03 |  |  |
|     | 0.1393E-04 0.9999E+00 |                                   |            |            |            |            |  |  |
| 150 | 0.8919E+02 0.1341E-04 | 0.9999E+00                        | 0.9478E+02 | 0.3511E-04 | 0.9998E+00 | 0.1181E+03 |  |  |
|     | 0.1966E-04 0.9999E+00 |                                   |            |            |            |            |  |  |

# V2\_Results\_baseline\_IEA\_delay.dat

|            |            |            |            |            |            |            |            |
|------------|------------|------------|------------|------------|------------|------------|------------|
| 155        | 0.9004E+02 | 0.1519E-04 | 0.9999E+00 | 0.9613E+02 | 0.2670E-04 | 0.9998E+00 | 0.1194E+03 |
| 0.1807E-04 | 0.9999E+00 |            |            |            |            |            |            |
| 160        | 0.9090E+02 | 0.1133E-04 | 0.9999E+00 | 0.9748E+02 | 0.1350E-04 | 0.9999E+00 | 0.1207E+03 |
| 0.1112E-04 | 0.9999E+00 |            |            |            |            |            |            |
| 165        | 0.9175E+02 | 0.6681E-05 | 0.9999E+00 | 0.9884E+02 | 0.1870E-04 | 0.9999E+00 | 0.1220E+03 |
| 0.8364E-05 | 0.9999E+00 |            |            |            |            |            |            |
| 170        | 0.9260E+02 | 0.1096E-04 | 0.9999E+00 | 0.1002E+03 | 0.2022E-04 | 0.9999E+00 | 0.1233E+03 |
| 0.7057E-05 | 0.1000E+01 |            |            |            |            |            |            |
| 175        | 0.9345E+02 | 0.1668E-04 | 0.1000E+01 | 0.1015E+03 | 0.1439E-04 | 0.9999E+00 | 0.1246E+03 |
| 0.6683E-05 | 0.1000E+01 |            |            |            |            |            |            |
| 180        | 0.9431E+02 | 0.1838E-04 | 0.1000E+01 | 0.1029E+03 | 0.9904E-05 | 0.1000E+01 | 0.1258E+03 |
| 0.5808E-05 | 0.1000E+01 |            |            |            |            |            |            |
| 185        | 0.9516E+02 | 0.1246E-04 | 0.1000E+01 | 0.1042E+03 | 0.1142E-04 | 0.1000E+01 | 0.1271E+03 |
| 0.6536E-05 | 0.1000E+01 |            |            |            |            |            |            |
| 190        | 0.9601E+02 | 0.8026E-05 | 0.1000E+01 | 0.1056E+03 | 0.8773E-05 | 0.1000E+01 | 0.1284E+03 |
| 0.5550E-05 | 0.1000E+01 |            |            |            |            |            |            |
| 195        | 0.9686E+02 | 0.5435E-05 | 0.1000E+01 | 0.1069E+03 | 0.2211E-05 | 0.1000E+01 | 0.1297E+03 |
| 0.4732E-05 | 0.1000E+01 |            |            |            |            |            |            |
| 200        | 0.9772E+02 | 0.4599E-05 | 0.1000E+01 | 0.1083E+03 | 0.3897E-05 | 0.1000E+01 | 0.1310E+03 |
| 0.2925E-05 | 0.1000E+01 |            |            |            |            |            |            |

| #    | *****       | Standardised | *****       |            |             |            |
|------|-------------|--------------|-------------|------------|-------------|------------|
| -200 | -0.3342E+01 | 0.4032E-04   | -0.2064E+01 | 0.1192E-02 | -0.3025E+01 | 0.1197E-03 |
| -195 | -0.3218E+01 | 0.8410E-04   | -0.1937E+01 | 0.4493E-02 | -0.2906E+01 | 0.2625E-03 |
| -190 | -0.3094E+01 | 0.2571E-03   | -0.1811E+01 | 0.1560E-01 | -0.2786E+01 | 0.6681E-03 |
| -185 | -0.2969E+01 | 0.3744E-03   | -0.1684E+01 | 0.3980E-01 | -0.2667E+01 | 0.1450E-02 |
| -180 | -0.2845E+01 | 0.6767E-03   | -0.1558E+01 | 0.7906E-01 | -0.2548E+01 | 0.3304E-02 |
| -175 | -0.2721E+01 | 0.1345E-02   | -0.1431E+01 | 0.1328E+00 | -0.2428E+01 | 0.6111E-02 |
| -170 | -0.2597E+01 | 0.2943E-02   | -0.1305E+01 | 0.1991E+00 | -0.2309E+01 | 0.1059E-01 |
| -165 | -0.2472E+01 | 0.5250E-02   | -0.1179E+01 | 0.2680E+00 | -0.2189E+01 | 0.1735E-01 |
| -160 | -0.2348E+01 | 0.9440E-02   | -0.1052E+01 | 0.3329E+00 | -0.2070E+01 | 0.2732E-01 |
| -155 | -0.2224E+01 | 0.1652E-01   | -0.9258E+00 | 0.3905E+00 | -0.1951E+01 | 0.4141E-01 |
| -150 | -0.2100E+01 | 0.2680E-01   | -0.7994E+00 | 0.4364E+00 | -0.1831E+01 | 0.5940E-01 |
| -145 | -0.1975E+01 | 0.4073E-01   | -0.6730E+00 | 0.4632E+00 | -0.1712E+01 | 0.8279E-01 |
| -140 | -0.1851E+01 | 0.5798E-01   | -0.5466E+00 | 0.4718E+00 | -0.1593E+01 | 0.1096E+00 |

V2\_Results\_baseline\_IEA\_delay.dat

|      |             |            |             |            |             |            |
|------|-------------|------------|-------------|------------|-------------|------------|
| -135 | -0.1727E+01 | 0.8077E-01 | -0.4202E+00 | 0.4684E+00 | -0.1473E+01 | 0.1420E+00 |
| -130 | -0.1603E+01 | 0.1095E+00 | -0.2938E+00 | 0.4560E+00 | -0.1354E+01 | 0.1784E+00 |
| -125 | -0.1478E+01 | 0.1449E+00 | -0.1674E+00 | 0.4371E+00 | -0.1234E+01 | 0.2198E+00 |
| -120 | -0.1354E+01 | 0.1800E+00 | -0.4095E-01 | 0.4121E+00 | -0.1115E+01 | 0.2601E+00 |
| -115 | -0.1230E+01 | 0.2168E+00 | 0.8546E-01  | 0.3837E+00 | -0.9956E+00 | 0.2971E+00 |
| -110 | -0.1106E+01 | 0.2554E+00 | 0.2119E+00  | 0.3539E+00 | -0.8763E+00 | 0.3293E+00 |
| -105 | -0.9815E+00 | 0.2956E+00 | 0.3383E+00  | 0.3220E+00 | -0.7569E+00 | 0.3576E+00 |
| -100 | -0.8572E+00 | 0.3309E+00 | 0.4647E+00  | 0.2900E+00 | -0.6375E+00 | 0.3783E+00 |
| -95  | -0.7330E+00 | 0.3572E+00 | 0.5911E+00  | 0.2571E+00 | -0.5181E+00 | 0.3917E+00 |
| -90  | -0.6087E+00 | 0.3773E+00 | 0.7175E+00  | 0.2256E+00 | -0.3987E+00 | 0.4052E+00 |
| -85  | -0.4845E+00 | 0.3946E+00 | 0.8439E+00  | 0.1969E+00 | -0.2794E+00 | 0.4150E+00 |
| -80  | -0.3603E+00 | 0.4067E+00 | 0.9703E+00  | 0.1725E+00 | -0.1600E+00 | 0.4162E+00 |
| -75  | -0.2360E+00 | 0.4098E+00 | 0.1097E+01  | 0.1532E+00 | -0.4061E-01 | 0.4040E+00 |
| -70  | -0.1118E+00 | 0.4074E+00 | 0.1223E+01  | 0.1342E+00 | 0.7877E-01  | 0.3893E+00 |
| -65  | 0.1245E-01  | 0.3986E+00 | 0.1350E+01  | 0.1150E+00 | 0.1981E+00  | 0.3722E+00 |
| -60  | 0.1367E+00  | 0.3827E+00 | 0.1476E+01  | 0.9718E-01 | 0.3175E+00  | 0.3502E+00 |
| -55  | 0.2609E+00  | 0.3589E+00 | 0.1602E+01  | 0.8404E-01 | 0.4369E+00  | 0.3230E+00 |
| -50  | 0.3852E+00  | 0.3351E+00 | 0.1729E+01  | 0.7466E-01 | 0.5563E+00  | 0.2964E+00 |
| -45  | 0.5094E+00  | 0.3114E+00 | 0.1855E+01  | 0.6533E-01 | 0.6757E+00  | 0.2730E+00 |
| -40  | 0.6337E+00  | 0.2887E+00 | 0.1982E+01  | 0.5589E-01 | 0.7950E+00  | 0.2487E+00 |
| -35  | 0.7579E+00  | 0.2635E+00 | 0.2108E+01  | 0.4666E-01 | 0.9144E+00  | 0.2233E+00 |
| -30  | 0.8821E+00  | 0.2363E+00 | 0.2234E+01  | 0.3947E-01 | 0.1034E+01  | 0.1970E+00 |
| -25  | 0.1006E+01  | 0.2084E+00 | 0.2361E+01  | 0.3404E-01 | 0.1153E+01  | 0.1730E+00 |
| -20  | 0.1131E+01  | 0.1796E+00 | 0.2487E+01  | 0.2922E-01 | 0.1273E+01  | 0.1503E+00 |
| -15  | 0.1255E+01  | 0.1543E+00 | 0.2614E+01  | 0.2503E-01 | 0.1392E+01  | 0.1313E+00 |
| -10  | 0.1379E+01  | 0.1335E+00 | 0.2740E+01  | 0.2093E-01 | 0.1511E+01  | 0.1143E+00 |
| -5   | 0.1503E+01  | 0.1146E+00 | 0.2867E+01  | 0.1777E-01 | 0.1631E+01  | 0.9782E-01 |
| 0    | 0.1628E+01  | 0.9588E-01 | 0.2993E+01  | 0.1477E-01 | 0.1750E+01  | 0.8162E-01 |
| 5    | 0.1752E+01  | 0.7968E-01 | 0.3119E+01  | 0.1283E-01 | 0.1869E+01  | 0.6712E-01 |
| 10   | 0.1876E+01  | 0.6796E-01 | 0.3246E+01  | 0.1164E-01 | 0.1989E+01  | 0.5683E-01 |
| 15   | 0.2000E+01  | 0.5802E-01 | 0.3372E+01  | 0.1079E-01 | 0.2108E+01  | 0.4878E-01 |
| 20   | 0.2125E+01  | 0.4801E-01 | 0.3499E+01  | 0.9287E-02 | 0.2228E+01  | 0.4156E-01 |
| 25   | 0.2249E+01  | 0.3879E-01 | 0.3625E+01  | 0.7710E-02 | 0.2347E+01  | 0.3414E-01 |
| 30   | 0.2373E+01  | 0.3164E-01 | 0.3751E+01  | 0.6150E-02 | 0.2466E+01  | 0.2770E-01 |
| 35   | 0.2497E+01  | 0.2614E-01 | 0.3878E+01  | 0.5045E-02 | 0.2586E+01  | 0.2303E-01 |
| 40   | 0.2622E+01  | 0.2132E-01 | 0.4004E+01  | 0.4070E-02 | 0.2705E+01  | 0.1929E-01 |

# V2\_Results\_baseline\_IEA\_delay.dat

|     |            |            |            |            |            |            |
|-----|------------|------------|------------|------------|------------|------------|
| 45  | 0.2746E+01 | 0.1733E-01 | 0.4131E+01 | 0.3665E-02 | 0.2824E+01 | 0.1581E-01 |
| 50  | 0.2870E+01 | 0.1417E-01 | 0.4257E+01 | 0.3202E-02 | 0.2944E+01 | 0.1237E-01 |
| 55  | 0.2994E+01 | 0.1172E-01 | 0.4383E+01 | 0.2870E-02 | 0.3063E+01 | 0.9682E-02 |
| 60  | 0.3118E+01 | 0.9432E-02 | 0.4510E+01 | 0.2344E-02 | 0.3183E+01 | 0.8045E-02 |
| 65  | 0.3243E+01 | 0.7380E-02 | 0.4636E+01 | 0.2154E-02 | 0.3302E+01 | 0.7016E-02 |
| 70  | 0.3367E+01 | 0.5995E-02 | 0.4763E+01 | 0.1888E-02 | 0.3421E+01 | 0.5915E-02 |
| 75  | 0.3491E+01 | 0.4791E-02 | 0.4889E+01 | 0.1500E-02 | 0.3541E+01 | 0.5071E-02 |
| 80  | 0.3615E+01 | 0.3427E-02 | 0.5016E+01 | 0.9946E-03 | 0.3660E+01 | 0.4122E-02 |
| 85  | 0.3740E+01 | 0.2657E-02 | 0.5142E+01 | 0.8584E-03 | 0.3780E+01 | 0.3224E-02 |
| 90  | 0.3864E+01 | 0.2252E-02 | 0.5268E+01 | 0.8280E-03 | 0.3899E+01 | 0.2305E-02 |
| 95  | 0.3988E+01 | 0.1835E-02 | 0.5395E+01 | 0.8018E-03 | 0.4018E+01 | 0.1907E-02 |
| 100 | 0.4112E+01 | 0.1270E-02 | 0.5521E+01 | 0.6946E-03 | 0.4138E+01 | 0.1407E-02 |
| 105 | 0.4237E+01 | 0.9831E-03 | 0.5648E+01 | 0.7131E-03 | 0.4257E+01 | 0.9363E-03 |
| 110 | 0.4361E+01 | 0.8412E-03 | 0.5774E+01 | 0.6016E-03 | 0.4376E+01 | 0.6593E-03 |
| 115 | 0.4485E+01 | 0.6221E-03 | 0.5900E+01 | 0.4999E-03 | 0.4496E+01 | 0.6577E-03 |
| 120 | 0.4609E+01 | 0.4112E-03 | 0.6027E+01 | 0.3951E-03 | 0.4615E+01 | 0.6074E-03 |
| 125 | 0.4734E+01 | 0.3030E-03 | 0.6153E+01 | 0.3646E-03 | 0.4735E+01 | 0.4598E-03 |
| 130 | 0.4858E+01 | 0.2871E-03 | 0.6280E+01 | 0.3152E-03 | 0.4854E+01 | 0.3264E-03 |
| 135 | 0.4982E+01 | 0.3107E-03 | 0.6406E+01 | 0.2714E-03 | 0.4973E+01 | 0.1923E-03 |
| 140 | 0.5106E+01 | 0.2563E-03 | 0.6532E+01 | 0.2182E-03 | 0.5093E+01 | 0.1378E-03 |
| 145 | 0.5231E+01 | 0.1770E-03 | 0.6659E+01 | 0.1298E-03 | 0.5212E+01 | 0.1503E-03 |
| 150 | 0.5355E+01 | 0.9202E-04 | 0.6785E+01 | 0.1355E-03 | 0.5331E+01 | 0.2122E-03 |
| 155 | 0.5479E+01 | 0.1043E-03 | 0.6912E+01 | 0.1465E-03 | 0.5451E+01 | 0.1949E-03 |
| 160 | 0.5603E+01 | 0.7771E-04 | 0.7038E+01 | 0.1641E-03 | 0.5570E+01 | 0.1199E-03 |
| 165 | 0.5728E+01 | 0.4585E-04 | 0.7165E+01 | 0.1303E-03 | 0.5690E+01 | 0.9024E-04 |
| 170 | 0.5852E+01 | 0.7517E-04 | 0.7291E+01 | 0.9272E-04 | 0.5809E+01 | 0.7614E-04 |
| 175 | 0.5976E+01 | 0.1144E-03 | 0.7417E+01 | 0.8041E-04 | 0.5928E+01 | 0.7210E-04 |
| 180 | 0.6100E+01 | 0.1261E-03 | 0.7544E+01 | 0.9234E-04 | 0.6048E+01 | 0.6266E-04 |
| 185 | 0.6224E+01 | 0.8552E-04 | 0.7670E+01 | 0.8237E-04 | 0.6167E+01 | 0.7052E-04 |
| 190 | 0.6349E+01 | 0.5507E-04 | 0.7797E+01 | 0.3852E-04 | 0.6286E+01 | 0.5988E-04 |
| 195 | 0.6473E+01 | 0.3729E-04 | 0.7923E+01 | 0.2075E-04 | 0.6406E+01 | 0.5106E-04 |
| 200 | 0.6597E+01 | 0.3156E-04 | 0.8049E+01 | 0.3158E-04 | 0.6525E+01 | 0.3156E-04 |

\*\*\*\*\*

\*\*\* p.d.f. LCE (US\$/MWh): TOTAL 2020, 2030, 2040 ,2050 (Smoothed, Not standardised) \*\*\*

# V2\_Results\_baseline\_IEA\_delay.dat

```

#*****
#
#          2020          2030          2040          2050
#
#  *****      NOT standardised      *****
#
# -200  0.7087E+02  0.7276E-05  0.5051E+02  0.2305E-05  0.2498E+02  0.1120E-04  0.2267E+02
# 0.2356E-04
# -195  0.7267E+02  0.1398E-04  0.5217E+02  0.3926E-05  0.2605E+02  0.1499E-04  0.2359E+02
# 0.7281E-04
# -190  0.7447E+02  0.2985E-04  0.5383E+02  0.8793E-05  0.2712E+02  0.2941E-04  0.2451E+02
# 0.1637E-03
# -185  0.7627E+02  0.7404E-04  0.5549E+02  0.2256E-04  0.2818E+02  0.1046E-03  0.2543E+02
# 0.3688E-03
# -180  0.7807E+02  0.1663E-03  0.5715E+02  0.5487E-04  0.2925E+02  0.2979E-03  0.2634E+02
# 0.7490E-03
# -175  0.7987E+02  0.3545E-03  0.5880E+02  0.1327E-03  0.3032E+02  0.6206E-03  0.2726E+02
# 0.1440E-02
# -170  0.8166E+02  0.7044E-03  0.6046E+02  0.2640E-03  0.3139E+02  0.1272E-02  0.2818E+02
# 0.2791E-02
# -165  0.8346E+02  0.1319E-02  0.6212E+02  0.4950E-03  0.3246E+02  0.2400E-02  0.2910E+02
# 0.4953E-02
# -160  0.8526E+02  0.2171E-02  0.6378E+02  0.8663E-03  0.3353E+02  0.4395E-02  0.3002E+02
# 0.7862E-02
# -155  0.8706E+02  0.3374E-02  0.6544E+02  0.1463E-02  0.3460E+02  0.7039E-02  0.3094E+02
# 0.1186E-01
# -150  0.8886E+02  0.4977E-02  0.6710E+02  0.2304E-02  0.3566E+02  0.1043E-01  0.3186E+02
# 0.1700E-01
# -145  0.9065E+02  0.7116E-02  0.6876E+02  0.3518E-02  0.3673E+02  0.1509E-01  0.3278E+02
# 0.2294E-01
# -140  0.9245E+02  0.9637E-02  0.7042E+02  0.5106E-02  0.3780E+02  0.2101E-01  0.3369E+02
# 0.2936E-01
# -135  0.9425E+02  0.1249E-01  0.7208E+02  0.6963E-02  0.3887E+02  0.2752E-01  0.3461E+02
# 0.3624E-01
# -130  0.9605E+02  0.1562E-01  0.7374E+02  0.9060E-02  0.3994E+02  0.3376E-01  0.3553E+02
# 0.4260E-01
# -125  0.9785E+02  0.1900E-01  0.7539E+02  0.1156E-01  0.4101E+02  0.3952E-01  0.3645E+02

```

# V2\_Results\_baseline\_IEA\_delay.dat

|            |            |            |            |            |            |            |            |
|------------|------------|------------|------------|------------|------------|------------|------------|
| 0.4856E-01 |            |            |            |            |            |            |            |
| -120       | 0.9965E+02 | 0.2213E-01 | 0.7705E+02 | 0.1438E-01 | 0.4207E+02 | 0.4459E-01 | 0.3737E+02 |
| 0.5363E-01 |            |            |            |            |            |            |            |
| -115       | 0.1014E+03 | 0.2470E-01 | 0.7871E+02 | 0.1740E-01 | 0.4314E+02 | 0.4905E-01 | 0.3829E+02 |
| 0.5699E-01 |            |            |            |            |            |            |            |
| -110       | 0.1032E+03 | 0.2671E-01 | 0.8037E+02 | 0.2031E-01 | 0.4421E+02 | 0.5263E-01 | 0.3921E+02 |
| 0.5920E-01 |            |            |            |            |            |            |            |
| -105       | 0.1050E+03 | 0.2838E-01 | 0.8203E+02 | 0.2281E-01 | 0.4528E+02 | 0.5478E-01 | 0.4013E+02 |
| 0.6076E-01 |            |            |            |            |            |            |            |
| -100       | 0.1068E+03 | 0.2985E-01 | 0.8369E+02 | 0.2499E-01 | 0.4635E+02 | 0.5548E-01 | 0.4104E+02 |
| 0.6117E-01 |            |            |            |            |            |            |            |
| -95        | 0.1086E+03 | 0.3068E-01 | 0.8535E+02 | 0.2700E-01 | 0.4742E+02 | 0.5508E-01 | 0.4196E+02 |
| 0.6021E-01 |            |            |            |            |            |            |            |
| -90        | 0.1104E+03 | 0.3065E-01 | 0.8701E+02 | 0.2867E-01 | 0.4849E+02 | 0.5295E-01 | 0.4288E+02 |
| 0.5813E-01 |            |            |            |            |            |            |            |
| -85        | 0.1122E+03 | 0.2990E-01 | 0.8867E+02 | 0.2977E-01 | 0.4955E+02 | 0.4986E-01 | 0.4380E+02 |
| 0.5494E-01 |            |            |            |            |            |            |            |
| -80        | 0.1140E+03 | 0.2865E-01 | 0.9033E+02 | 0.3055E-01 | 0.5062E+02 | 0.4670E-01 | 0.4472E+02 |
| 0.5081E-01 |            |            |            |            |            |            |            |
| -75        | 0.1158E+03 | 0.2694E-01 | 0.9198E+02 | 0.3074E-01 | 0.5169E+02 | 0.4357E-01 | 0.4564E+02 |
| 0.4623E-01 |            |            |            |            |            |            |            |
| -70        | 0.1176E+03 | 0.2521E-01 | 0.9364E+02 | 0.3009E-01 | 0.5276E+02 | 0.3925E-01 | 0.4656E+02 |
| 0.4198E-01 |            |            |            |            |            |            |            |
| -65        | 0.1194E+03 | 0.2333E-01 | 0.9530E+02 | 0.2878E-01 | 0.5383E+02 | 0.3482E-01 | 0.4748E+02 |
| 0.3768E-01 |            |            |            |            |            |            |            |
| -60        | 0.1212E+03 | 0.2129E-01 | 0.9696E+02 | 0.2733E-01 | 0.5490E+02 | 0.3032E-01 | 0.4839E+02 |
| 0.3323E-01 |            |            |            |            |            |            |            |
| -55        | 0.1230E+03 | 0.1903E-01 | 0.9862E+02 | 0.2589E-01 | 0.5596E+02 | 0.2632E-01 | 0.4931E+02 |
| 0.2901E-01 |            |            |            |            |            |            |            |
| -50        | 0.1248E+03 | 0.1697E-01 | 0.1003E+03 | 0.2430E-01 | 0.5703E+02 | 0.2274E-01 | 0.5023E+02 |
| 0.2560E-01 |            |            |            |            |            |            |            |
| -45        | 0.1266E+03 | 0.1502E-01 | 0.1019E+03 | 0.2246E-01 | 0.5810E+02 | 0.1954E-01 | 0.5115E+02 |
| 0.2206E-01 |            |            |            |            |            |            |            |
| -40        | 0.1284E+03 | 0.1322E-01 | 0.1036E+03 | 0.2033E-01 | 0.5917E+02 | 0.1670E-01 | 0.5207E+02 |
| 0.1859E-01 |            |            |            |            |            |            |            |
| -35        | 0.1302E+03 | 0.1135E-01 | 0.1053E+03 | 0.1824E-01 | 0.6024E+02 | 0.1422E-01 | 0.5299E+02 |

V2\_Results\_baseline\_IEA\_delay.dat

|            |     |            |            |            |            |            |            |            |
|------------|-----|------------|------------|------------|------------|------------|------------|------------|
| 0.1565E-01 | -30 | 0.1320E+03 | 0.9610E-02 | 0.1069E+03 | 0.1638E-01 | 0.6131E+02 | 0.1196E-01 | 0.5391E+02 |
| 0.1320E-01 | -25 | 0.1338E+03 | 0.8047E-02 | 0.1086E+03 | 0.1469E-01 | 0.6238E+02 | 0.9741E-02 | 0.5483E+02 |
| 0.1125E-01 | -20 | 0.1356E+03 | 0.6864E-02 | 0.1102E+03 | 0.1312E-01 | 0.6344E+02 | 0.7944E-02 | 0.5574E+02 |
| 0.9417E-02 | -15 | 0.1374E+03 | 0.5820E-02 | 0.1119E+03 | 0.1146E-01 | 0.6451E+02 | 0.6547E-02 | 0.5666E+02 |
| 0.7603E-02 | -10 | 0.1392E+03 | 0.4832E-02 | 0.1136E+03 | 0.9856E-02 | 0.6558E+02 | 0.5360E-02 | 0.5758E+02 |
| 0.6087E-02 | -5  | 0.1410E+03 | 0.3893E-02 | 0.1152E+03 | 0.8339E-02 | 0.6665E+02 | 0.4199E-02 | 0.5850E+02 |
| 0.5128E-02 | 0   | 0.1428E+03 | 0.3164E-02 | 0.1169E+03 | 0.7058E-02 | 0.6772E+02 | 0.3534E-02 | 0.5942E+02 |
| 0.4343E-02 | 5   | 0.1446E+03 | 0.2564E-02 | 0.1185E+03 | 0.5955E-02 | 0.6879E+02 | 0.2964E-02 | 0.6034E+02 |
| 0.3535E-02 | 10  | 0.1464E+03 | 0.2063E-02 | 0.1202E+03 | 0.5083E-02 | 0.6986E+02 | 0.2333E-02 | 0.6126E+02 |
| 0.2785E-02 | 15  | 0.1482E+03 | 0.1685E-02 | 0.1218E+03 | 0.4381E-02 | 0.7092E+02 | 0.1789E-02 | 0.6218E+02 |
| 0.2227E-02 | 20  | 0.1500E+03 | 0.1359E-02 | 0.1235E+03 | 0.3817E-02 | 0.7199E+02 | 0.1441E-02 | 0.6309E+02 |
| 0.1828E-02 | 25  | 0.1518E+03 | 0.1082E-02 | 0.1252E+03 | 0.3174E-02 | 0.7306E+02 | 0.1224E-02 | 0.6401E+02 |
| 0.1545E-02 | 30  | 0.1536E+03 | 0.8429E-03 | 0.1268E+03 | 0.2565E-02 | 0.7413E+02 | 0.1024E-02 | 0.6493E+02 |
| 0.1258E-02 | 35  | 0.1554E+03 | 0.6773E-03 | 0.1285E+03 | 0.2082E-02 | 0.7520E+02 | 0.7746E-03 | 0.6585E+02 |
| 0.9651E-03 | 40  | 0.1572E+03 | 0.5634E-03 | 0.1301E+03 | 0.1752E-02 | 0.7627E+02 | 0.5765E-03 | 0.6677E+02 |
| 0.8225E-03 | 45  | 0.1590E+03 | 0.4403E-03 | 0.1318E+03 | 0.1425E-02 | 0.7733E+02 | 0.4820E-03 | 0.6769E+02 |
| 0.7049E-03 | 50  | 0.1608E+03 | 0.3268E-03 | 0.1335E+03 | 0.1125E-02 | 0.7840E+02 | 0.3756E-03 | 0.6861E+02 |
| 0.5356E-03 | 55  | 0.1626E+03 | 0.2462E-03 | 0.1351E+03 | 0.8892E-03 | 0.7947E+02 | 0.2826E-03 | 0.6953E+02 |



V2\_Results\_baseline\_IEA\_delay.dat

|            |     |            |            |            |            |            |            |            |
|------------|-----|------------|------------|------------|------------|------------|------------|------------|
| 0.3916E-03 | 60  | 0.1644E+03 | 0.2101E-03 | 0.1368E+03 | 0.7146E-03 | 0.8054E+02 | 0.2250E-03 | 0.7044E+02 |
| 0.3357E-03 | 65  | 0.1662E+03 | 0.1775E-03 | 0.1384E+03 | 0.5645E-03 | 0.8161E+02 | 0.1828E-03 | 0.7136E+02 |
| 0.2907E-03 | 70  | 0.1680E+03 | 0.1575E-03 | 0.1401E+03 | 0.4616E-03 | 0.8268E+02 | 0.1379E-03 | 0.7228E+02 |
| 0.2458E-03 | 75  | 0.1698E+03 | 0.1271E-03 | 0.1418E+03 | 0.3712E-03 | 0.8375E+02 | 0.9626E-04 | 0.7320E+02 |
| 0.1802E-03 | 80  | 0.1716E+03 | 0.9997E-04 | 0.1434E+03 | 0.3080E-03 | 0.8481E+02 | 0.8485E-04 | 0.7412E+02 |
| 0.1396E-03 | 85  | 0.1734E+03 | 0.6736E-04 | 0.1451E+03 | 0.2749E-03 | 0.8588E+02 | 0.7875E-04 | 0.7504E+02 |
| 0.1226E-03 | 90  | 0.1752E+03 | 0.4007E-04 | 0.1467E+03 | 0.2423E-03 | 0.8695E+02 | 0.6806E-04 | 0.7596E+02 |
| 0.1100E-03 | 95  | 0.1770E+03 | 0.2720E-04 | 0.1484E+03 | 0.2019E-03 | 0.8802E+02 | 0.5296E-04 | 0.7687E+02 |
| 0.8221E-04 | 100 | 0.1788E+03 | 0.2372E-04 | 0.1500E+03 | 0.1505E-03 | 0.8909E+02 | 0.3890E-04 | 0.7779E+02 |
| 0.6337E-04 | 105 | 0.1806E+03 | 0.2057E-04 | 0.1517E+03 | 0.1141E-03 | 0.9016E+02 | 0.4047E-04 | 0.7871E+02 |
| 0.5276E-04 | 110 | 0.1824E+03 | 0.8638E-05 | 0.1534E+03 | 0.9813E-04 | 0.9122E+02 | 0.3095E-04 | 0.7963E+02 |
| 0.4468E-04 | 115 | 0.1842E+03 | 0.2622E-05 | 0.1550E+03 | 0.8409E-04 | 0.9229E+02 | 0.2338E-04 | 0.8055E+02 |
| 0.3383E-04 | 120 | 0.1860E+03 | 0.8135E-05 | 0.1567E+03 | 0.6488E-04 | 0.9336E+02 | 0.3037E-04 | 0.8147E+02 |
| 0.2817E-04 | 125 | 0.1878E+03 | 0.8778E-05 | 0.1583E+03 | 0.5253E-04 | 0.9443E+02 | 0.2881E-04 | 0.8239E+02 |
| 0.3599E-04 | 130 | 0.1896E+03 | 0.5505E-05 | 0.1600E+03 | 0.3996E-04 | 0.9550E+02 | 0.2285E-04 | 0.8331E+02 |
| 0.3742E-04 | 135 | 0.1914E+03 | 0.7007E-05 | 0.1617E+03 | 0.3066E-04 | 0.9657E+02 | 0.1669E-04 | 0.8422E+02 |
| 0.2759E-04 | 140 | 0.1932E+03 | 0.1008E-04 | 0.1633E+03 | 0.2086E-04 | 0.9764E+02 | 0.1091E-04 | 0.8514E+02 |
| 0.1531E-04 | 145 | 0.1949E+03 | 0.7039E-05 | 0.1650E+03 | 0.1224E-04 | 0.9870E+02 | 0.8156E-05 | 0.8606E+02 |

# V2\_Results\_baseline\_IEA\_delay.dat

```

0.5774E-05
 150  0.1967E+03  0.1596E-05  0.1666E+03  0.7572E-05  0.9977E+02  0.6645E-05  0.8698E+02
0.1976E-05
 155  0.1985E+03  0.0000E+00  0.1683E+03  0.6599E-05  0.1008E+03  0.3859E-05  0.8790E+02
0.4103E-05
 160  0.2003E+03  0.0000E+00  0.1700E+03  0.5236E-05  0.1019E+03  0.3688E-05  0.8882E+02
0.1795E-04
 165  0.2021E+03  0.0000E+00  0.1716E+03  0.5466E-05  0.1030E+03  0.6403E-06  0.8974E+02
0.2519E-04
 170  0.2039E+03  0.0000E+00  0.1733E+03  0.6723E-05  0.1040E+03  0.0000E+00  0.9066E+02
0.1838E-04
 175  0.2057E+03  0.0000E+00  0.1749E+03  0.6064E-05  0.1051E+03  0.0000E+00  0.9157E+02
0.8267E-05
 180  0.2075E+03  0.0000E+00  0.1766E+03  0.2851E-05  0.1062E+03  0.0000E+00  0.9249E+02
0.2958E-05
 185  0.2093E+03  0.0000E+00  0.1783E+03  0.2198E-05  0.1073E+03  0.0000E+00  0.9341E+02
0.2080E-05
 190  0.2111E+03  0.0000E+00  0.1799E+03  0.2117E-05  0.1083E+03  0.0000E+00  0.9433E+02
0.4441E-05
 195  0.2129E+03  0.1450E-05  0.1816E+03  0.2407E-05  0.1094E+03  0.2398E-05  0.9525E+02
0.6744E-05
 200  0.2147E+03  0.2325E-05  0.1832E+03  0.2305E-05  0.1105E+03  0.4124E-05  0.9617E+02
0.5054E-05

```

# \*\*\*\*\* adaptados para un plot en 3D con gnuplot \*\*\*\*\*

```

0.7087E+02  0.7276E-05  0.2020E+04  0xff0000
0.7267E+02  0.1398E-04  0.2020E+04  0xff0000
0.7447E+02  0.2985E-04  0.2020E+04  0xff0000
0.7627E+02  0.7404E-04  0.2020E+04  0xff0000
0.7807E+02  0.1663E-03  0.2020E+04  0xff0000
0.7987E+02  0.3545E-03  0.2020E+04  0xff0000
0.8166E+02  0.7044E-03  0.2020E+04  0xff0000
0.8346E+02  0.1319E-02  0.2020E+04  0xff0000
0.8526E+02  0.2171E-02  0.2020E+04  0xff0000
0.8706E+02  0.3374E-02  0.2020E+04  0xff0000

```

V2\_Results\_baseline\_IEA\_delay.dat

|            |            |            |          |
|------------|------------|------------|----------|
| 0.8886E+02 | 0.4977E-02 | 0.2020E+04 | 0xff0000 |
| 0.9065E+02 | 0.7116E-02 | 0.2020E+04 | 0xff0000 |
| 0.9245E+02 | 0.9637E-02 | 0.2020E+04 | 0xff0000 |
| 0.9425E+02 | 0.1249E-01 | 0.2020E+04 | 0xff0000 |
| 0.9605E+02 | 0.1562E-01 | 0.2020E+04 | 0xff0000 |
| 0.9785E+02 | 0.1900E-01 | 0.2020E+04 | 0xff0000 |
| 0.9965E+02 | 0.2213E-01 | 0.2020E+04 | 0xff0000 |
| 0.1014E+03 | 0.2470E-01 | 0.2020E+04 | 0xff0000 |
| 0.1032E+03 | 0.2671E-01 | 0.2020E+04 | 0xff0000 |
| 0.1050E+03 | 0.2838E-01 | 0.2020E+04 | 0xff0000 |
| 0.1068E+03 | 0.2985E-01 | 0.2020E+04 | 0xff0000 |
| 0.1086E+03 | 0.3068E-01 | 0.2020E+04 | 0xff0000 |
| 0.1104E+03 | 0.3065E-01 | 0.2020E+04 | 0xff0000 |
| 0.1122E+03 | 0.2990E-01 | 0.2020E+04 | 0xff0000 |
| 0.1140E+03 | 0.2865E-01 | 0.2020E+04 | 0xff0000 |
| 0.1158E+03 | 0.2694E-01 | 0.2020E+04 | 0xff0000 |
| 0.1176E+03 | 0.2521E-01 | 0.2020E+04 | 0xff0000 |
| 0.1194E+03 | 0.2333E-01 | 0.2020E+04 | 0xff0000 |
| 0.1212E+03 | 0.2129E-01 | 0.2020E+04 | 0xff0000 |
| 0.1230E+03 | 0.1903E-01 | 0.2020E+04 | 0xff0000 |
| 0.1248E+03 | 0.1697E-01 | 0.2020E+04 | 0xff0000 |
| 0.1266E+03 | 0.1502E-01 | 0.2020E+04 | 0xff0000 |
| 0.1284E+03 | 0.1322E-01 | 0.2020E+04 | 0xff0000 |
| 0.1302E+03 | 0.1135E-01 | 0.2020E+04 | 0xff0000 |
| 0.1320E+03 | 0.9610E-02 | 0.2020E+04 | 0xff0000 |
| 0.1338E+03 | 0.8047E-02 | 0.2020E+04 | 0xff0000 |
| 0.1356E+03 | 0.6864E-02 | 0.2020E+04 | 0xff0000 |
| 0.1374E+03 | 0.5820E-02 | 0.2020E+04 | 0xff0000 |
| 0.1392E+03 | 0.4832E-02 | 0.2020E+04 | 0xff0000 |
| 0.1410E+03 | 0.3893E-02 | 0.2020E+04 | 0xff0000 |
| 0.1428E+03 | 0.3164E-02 | 0.2020E+04 | 0xff0000 |
| 0.1446E+03 | 0.2564E-02 | 0.2020E+04 | 0xff0000 |
| 0.1464E+03 | 0.2063E-02 | 0.2020E+04 | 0xff0000 |
| 0.1482E+03 | 0.1685E-02 | 0.2020E+04 | 0xff0000 |
| 0.1500E+03 | 0.1359E-02 | 0.2020E+04 | 0xff0000 |
| 0.1518E+03 | 0.1082E-02 | 0.2020E+04 | 0xff0000 |

V2\_Results\_baseline\_IEA\_delay.dat

|            |            |            |          |
|------------|------------|------------|----------|
| 0.1536E+03 | 0.8429E-03 | 0.2020E+04 | 0xff0000 |
| 0.1554E+03 | 0.6773E-03 | 0.2020E+04 | 0xff0000 |
| 0.1572E+03 | 0.5634E-03 | 0.2020E+04 | 0xff0000 |
| 0.1590E+03 | 0.4403E-03 | 0.2020E+04 | 0xff0000 |
| 0.1608E+03 | 0.3268E-03 | 0.2020E+04 | 0xff0000 |
| 0.1626E+03 | 0.2462E-03 | 0.2020E+04 | 0xff0000 |
| 0.1644E+03 | 0.2101E-03 | 0.2020E+04 | 0xff0000 |
| 0.1662E+03 | 0.1775E-03 | 0.2020E+04 | 0xff0000 |
| 0.1680E+03 | 0.1575E-03 | 0.2020E+04 | 0xff0000 |
| 0.1698E+03 | 0.1271E-03 | 0.2020E+04 | 0xff0000 |
| 0.1716E+03 | 0.9997E-04 | 0.2020E+04 | 0xff0000 |
| 0.1734E+03 | 0.6736E-04 | 0.2020E+04 | 0xff0000 |
| 0.1752E+03 | 0.4007E-04 | 0.2020E+04 | 0xff0000 |
| 0.1770E+03 | 0.2720E-04 | 0.2020E+04 | 0xff0000 |
| 0.1788E+03 | 0.2372E-04 | 0.2020E+04 | 0xff0000 |
| 0.1806E+03 | 0.2057E-04 | 0.2020E+04 | 0xff0000 |
| 0.1824E+03 | 0.8638E-05 | 0.2020E+04 | 0xff0000 |
| 0.1842E+03 | 0.2622E-05 | 0.2020E+04 | 0xff0000 |
| 0.1860E+03 | 0.8135E-05 | 0.2020E+04 | 0xff0000 |
| 0.1878E+03 | 0.8778E-05 | 0.2020E+04 | 0xff0000 |
| 0.1896E+03 | 0.5505E-05 | 0.2020E+04 | 0xff0000 |
| 0.1914E+03 | 0.7007E-05 | 0.2020E+04 | 0xff0000 |
| 0.1932E+03 | 0.1008E-04 | 0.2020E+04 | 0xff0000 |
| 0.1949E+03 | 0.7039E-05 | 0.2020E+04 | 0xff0000 |
| 0.1967E+03 | 0.1596E-05 | 0.2020E+04 | 0xff0000 |
| 0.1985E+03 | 0.0000E+00 | 0.2020E+04 | 0xff0000 |
| 0.2003E+03 | 0.0000E+00 | 0.2020E+04 | 0xff0000 |
| 0.2021E+03 | 0.0000E+00 | 0.2020E+04 | 0xff0000 |
| 0.2039E+03 | 0.0000E+00 | 0.2020E+04 | 0xff0000 |
| 0.2057E+03 | 0.0000E+00 | 0.2020E+04 | 0xff0000 |
| 0.2075E+03 | 0.0000E+00 | 0.2020E+04 | 0xff0000 |
| 0.2093E+03 | 0.0000E+00 | 0.2020E+04 | 0xff0000 |
| 0.2111E+03 | 0.0000E+00 | 0.2020E+04 | 0xff0000 |
| 0.2129E+03 | 0.1450E-05 | 0.2020E+04 | 0xff0000 |
| 0.2147E+03 | 0.2325E-05 | 0.2020E+04 | 0xff0000 |

V2\_Results\_baseline\_IEA\_delay.dat

|            |            |            |           |
|------------|------------|------------|-----------|
| 0.5051E+02 | 0.2305E-05 | 0.2030E+04 | 0xfffff00 |
| 0.5217E+02 | 0.3926E-05 | 0.2030E+04 | 0xfffff00 |
| 0.5383E+02 | 0.8793E-05 | 0.2030E+04 | 0xfffff00 |
| 0.5549E+02 | 0.2256E-04 | 0.2030E+04 | 0xfffff00 |
| 0.5715E+02 | 0.5487E-04 | 0.2030E+04 | 0xfffff00 |
| 0.5880E+02 | 0.1327E-03 | 0.2030E+04 | 0xfffff00 |
| 0.6046E+02 | 0.2640E-03 | 0.2030E+04 | 0xfffff00 |
| 0.6212E+02 | 0.4950E-03 | 0.2030E+04 | 0xfffff00 |
| 0.6378E+02 | 0.8663E-03 | 0.2030E+04 | 0xfffff00 |
| 0.6544E+02 | 0.1463E-02 | 0.2030E+04 | 0xfffff00 |
| 0.6710E+02 | 0.2304E-02 | 0.2030E+04 | 0xfffff00 |
| 0.6876E+02 | 0.3518E-02 | 0.2030E+04 | 0xfffff00 |
| 0.7042E+02 | 0.5106E-02 | 0.2030E+04 | 0xfffff00 |
| 0.7208E+02 | 0.6963E-02 | 0.2030E+04 | 0xfffff00 |
| 0.7374E+02 | 0.9060E-02 | 0.2030E+04 | 0xfffff00 |
| 0.7539E+02 | 0.1156E-01 | 0.2030E+04 | 0xfffff00 |
| 0.7705E+02 | 0.1438E-01 | 0.2030E+04 | 0xfffff00 |
| 0.7871E+02 | 0.1740E-01 | 0.2030E+04 | 0xfffff00 |
| 0.8037E+02 | 0.2031E-01 | 0.2030E+04 | 0xfffff00 |
| 0.8203E+02 | 0.2281E-01 | 0.2030E+04 | 0xfffff00 |
| 0.8369E+02 | 0.2499E-01 | 0.2030E+04 | 0xfffff00 |
| 0.8535E+02 | 0.2700E-01 | 0.2030E+04 | 0xfffff00 |
| 0.8701E+02 | 0.2867E-01 | 0.2030E+04 | 0xfffff00 |
| 0.8867E+02 | 0.2977E-01 | 0.2030E+04 | 0xfffff00 |
| 0.9033E+02 | 0.3055E-01 | 0.2030E+04 | 0xfffff00 |
| 0.9198E+02 | 0.3074E-01 | 0.2030E+04 | 0xfffff00 |
| 0.9364E+02 | 0.3009E-01 | 0.2030E+04 | 0xfffff00 |
| 0.9530E+02 | 0.2878E-01 | 0.2030E+04 | 0xfffff00 |
| 0.9696E+02 | 0.2733E-01 | 0.2030E+04 | 0xfffff00 |
| 0.9862E+02 | 0.2589E-01 | 0.2030E+04 | 0xfffff00 |
| 0.1003E+03 | 0.2430E-01 | 0.2030E+04 | 0xfffff00 |
| 0.1019E+03 | 0.2246E-01 | 0.2030E+04 | 0xfffff00 |
| 0.1036E+03 | 0.2033E-01 | 0.2030E+04 | 0xfffff00 |
| 0.1053E+03 | 0.1824E-01 | 0.2030E+04 | 0xfffff00 |
| 0.1069E+03 | 0.1638E-01 | 0.2030E+04 | 0xfffff00 |
| 0.1086E+03 | 0.1469E-01 | 0.2030E+04 | 0xfffff00 |

V2\_Results\_baseline\_IEA\_delay.dat

|            |            |            |           |
|------------|------------|------------|-----------|
| 0.1102E+03 | 0.1312E-01 | 0.2030E+04 | 0xfffff00 |
| 0.1119E+03 | 0.1146E-01 | 0.2030E+04 | 0xfffff00 |
| 0.1136E+03 | 0.9856E-02 | 0.2030E+04 | 0xfffff00 |
| 0.1152E+03 | 0.8339E-02 | 0.2030E+04 | 0xfffff00 |
| 0.1169E+03 | 0.7058E-02 | 0.2030E+04 | 0xfffff00 |
| 0.1185E+03 | 0.5955E-02 | 0.2030E+04 | 0xfffff00 |
| 0.1202E+03 | 0.5083E-02 | 0.2030E+04 | 0xfffff00 |
| 0.1218E+03 | 0.4381E-02 | 0.2030E+04 | 0xfffff00 |
| 0.1235E+03 | 0.3817E-02 | 0.2030E+04 | 0xfffff00 |
| 0.1252E+03 | 0.3174E-02 | 0.2030E+04 | 0xfffff00 |
| 0.1268E+03 | 0.2565E-02 | 0.2030E+04 | 0xfffff00 |
| 0.1285E+03 | 0.2082E-02 | 0.2030E+04 | 0xfffff00 |
| 0.1301E+03 | 0.1752E-02 | 0.2030E+04 | 0xfffff00 |
| 0.1318E+03 | 0.1425E-02 | 0.2030E+04 | 0xfffff00 |
| 0.1335E+03 | 0.1125E-02 | 0.2030E+04 | 0xfffff00 |
| 0.1351E+03 | 0.8892E-03 | 0.2030E+04 | 0xfffff00 |
| 0.1368E+03 | 0.7146E-03 | 0.2030E+04 | 0xfffff00 |
| 0.1384E+03 | 0.5645E-03 | 0.2030E+04 | 0xfffff00 |
| 0.1401E+03 | 0.4616E-03 | 0.2030E+04 | 0xfffff00 |
| 0.1418E+03 | 0.3712E-03 | 0.2030E+04 | 0xfffff00 |
| 0.1434E+03 | 0.3080E-03 | 0.2030E+04 | 0xfffff00 |
| 0.1451E+03 | 0.2749E-03 | 0.2030E+04 | 0xfffff00 |
| 0.1467E+03 | 0.2423E-03 | 0.2030E+04 | 0xfffff00 |
| 0.1484E+03 | 0.2019E-03 | 0.2030E+04 | 0xfffff00 |
| 0.1500E+03 | 0.1505E-03 | 0.2030E+04 | 0xfffff00 |
| 0.1517E+03 | 0.1141E-03 | 0.2030E+04 | 0xfffff00 |
| 0.1534E+03 | 0.9813E-04 | 0.2030E+04 | 0xfffff00 |
| 0.1550E+03 | 0.8409E-04 | 0.2030E+04 | 0xfffff00 |
| 0.1567E+03 | 0.6488E-04 | 0.2030E+04 | 0xfffff00 |
| 0.1583E+03 | 0.5253E-04 | 0.2030E+04 | 0xfffff00 |
| 0.1600E+03 | 0.3996E-04 | 0.2030E+04 | 0xfffff00 |
| 0.1617E+03 | 0.3066E-04 | 0.2030E+04 | 0xfffff00 |
| 0.1633E+03 | 0.2086E-04 | 0.2030E+04 | 0xfffff00 |
| 0.1650E+03 | 0.1224E-04 | 0.2030E+04 | 0xfffff00 |
| 0.1666E+03 | 0.7572E-05 | 0.2030E+04 | 0xfffff00 |
| 0.1683E+03 | 0.6599E-05 | 0.2030E+04 | 0xfffff00 |

V2\_Results\_baseline\_IEA\_delay.dat

|            |            |            |           |
|------------|------------|------------|-----------|
| 0.1700E+03 | 0.5236E-05 | 0.2030E+04 | 0xfffff00 |
| 0.1716E+03 | 0.5466E-05 | 0.2030E+04 | 0xfffff00 |
| 0.1733E+03 | 0.6723E-05 | 0.2030E+04 | 0xfffff00 |
| 0.1749E+03 | 0.6064E-05 | 0.2030E+04 | 0xfffff00 |
| 0.1766E+03 | 0.2851E-05 | 0.2030E+04 | 0xfffff00 |
| 0.1783E+03 | 0.2198E-05 | 0.2030E+04 | 0xfffff00 |
| 0.1799E+03 | 0.2117E-05 | 0.2030E+04 | 0xfffff00 |
| 0.1816E+03 | 0.2407E-05 | 0.2030E+04 | 0xfffff00 |
| 0.1832E+03 | 0.2305E-05 | 0.2030E+04 | 0xfffff00 |
|            |            |            |           |
| 0.2498E+02 | 0.1120E-04 | 0.2040E+04 | 0x00ffff  |
| 0.2605E+02 | 0.1499E-04 | 0.2040E+04 | 0x00ffff  |
| 0.2712E+02 | 0.2941E-04 | 0.2040E+04 | 0x00ffff  |
| 0.2818E+02 | 0.1046E-03 | 0.2040E+04 | 0x00ffff  |
| 0.2925E+02 | 0.2979E-03 | 0.2040E+04 | 0x00ffff  |
| 0.3032E+02 | 0.6206E-03 | 0.2040E+04 | 0x00ffff  |
| 0.3139E+02 | 0.1272E-02 | 0.2040E+04 | 0x00ffff  |
| 0.3246E+02 | 0.2400E-02 | 0.2040E+04 | 0x00ffff  |
| 0.3353E+02 | 0.4395E-02 | 0.2040E+04 | 0x00ffff  |
| 0.3460E+02 | 0.7039E-02 | 0.2040E+04 | 0x00ffff  |
| 0.3566E+02 | 0.1043E-01 | 0.2040E+04 | 0x00ffff  |
| 0.3673E+02 | 0.1509E-01 | 0.2040E+04 | 0x00ffff  |
| 0.3780E+02 | 0.2101E-01 | 0.2040E+04 | 0x00ffff  |
| 0.3887E+02 | 0.2752E-01 | 0.2040E+04 | 0x00ffff  |
| 0.3994E+02 | 0.3376E-01 | 0.2040E+04 | 0x00ffff  |
| 0.4101E+02 | 0.3952E-01 | 0.2040E+04 | 0x00ffff  |
| 0.4207E+02 | 0.4459E-01 | 0.2040E+04 | 0x00ffff  |
| 0.4314E+02 | 0.4905E-01 | 0.2040E+04 | 0x00ffff  |
| 0.4421E+02 | 0.5263E-01 | 0.2040E+04 | 0x00ffff  |
| 0.4528E+02 | 0.5478E-01 | 0.2040E+04 | 0x00ffff  |
| 0.4635E+02 | 0.5548E-01 | 0.2040E+04 | 0x00ffff  |
| 0.4742E+02 | 0.5508E-01 | 0.2040E+04 | 0x00ffff  |
| 0.4849E+02 | 0.5295E-01 | 0.2040E+04 | 0x00ffff  |
| 0.4955E+02 | 0.4986E-01 | 0.2040E+04 | 0x00ffff  |
| 0.5062E+02 | 0.4670E-01 | 0.2040E+04 | 0x00ffff  |
| 0.5169E+02 | 0.4357E-01 | 0.2040E+04 | 0x00ffff  |

V2\_Results\_baseline\_IEA\_delay.dat

|            |            |            |          |
|------------|------------|------------|----------|
| 0.5276E+02 | 0.3925E-01 | 0.2040E+04 | 0x00ffff |
| 0.5383E+02 | 0.3482E-01 | 0.2040E+04 | 0x00ffff |
| 0.5490E+02 | 0.3032E-01 | 0.2040E+04 | 0x00ffff |
| 0.5596E+02 | 0.2632E-01 | 0.2040E+04 | 0x00ffff |
| 0.5703E+02 | 0.2274E-01 | 0.2040E+04 | 0x00ffff |
| 0.5810E+02 | 0.1954E-01 | 0.2040E+04 | 0x00ffff |
| 0.5917E+02 | 0.1670E-01 | 0.2040E+04 | 0x00ffff |
| 0.6024E+02 | 0.1422E-01 | 0.2040E+04 | 0x00ffff |
| 0.6131E+02 | 0.1196E-01 | 0.2040E+04 | 0x00ffff |
| 0.6238E+02 | 0.9741E-02 | 0.2040E+04 | 0x00ffff |
| 0.6344E+02 | 0.7944E-02 | 0.2040E+04 | 0x00ffff |
| 0.6451E+02 | 0.6547E-02 | 0.2040E+04 | 0x00ffff |
| 0.6558E+02 | 0.5360E-02 | 0.2040E+04 | 0x00ffff |
| 0.6665E+02 | 0.4199E-02 | 0.2040E+04 | 0x00ffff |
| 0.6772E+02 | 0.3534E-02 | 0.2040E+04 | 0x00ffff |
| 0.6879E+02 | 0.2964E-02 | 0.2040E+04 | 0x00ffff |
| 0.6986E+02 | 0.2333E-02 | 0.2040E+04 | 0x00ffff |
| 0.7092E+02 | 0.1789E-02 | 0.2040E+04 | 0x00ffff |
| 0.7199E+02 | 0.1441E-02 | 0.2040E+04 | 0x00ffff |
| 0.7306E+02 | 0.1224E-02 | 0.2040E+04 | 0x00ffff |
| 0.7413E+02 | 0.1024E-02 | 0.2040E+04 | 0x00ffff |
| 0.7520E+02 | 0.7746E-03 | 0.2040E+04 | 0x00ffff |
| 0.7627E+02 | 0.5765E-03 | 0.2040E+04 | 0x00ffff |
| 0.7733E+02 | 0.4820E-03 | 0.2040E+04 | 0x00ffff |
| 0.7840E+02 | 0.3756E-03 | 0.2040E+04 | 0x00ffff |
| 0.7947E+02 | 0.2826E-03 | 0.2040E+04 | 0x00ffff |
| 0.8054E+02 | 0.2250E-03 | 0.2040E+04 | 0x00ffff |
| 0.8161E+02 | 0.1828E-03 | 0.2040E+04 | 0x00ffff |
| 0.8268E+02 | 0.1379E-03 | 0.2040E+04 | 0x00ffff |
| 0.8375E+02 | 0.9626E-04 | 0.2040E+04 | 0x00ffff |
| 0.8481E+02 | 0.8485E-04 | 0.2040E+04 | 0x00ffff |
| 0.8588E+02 | 0.7875E-04 | 0.2040E+04 | 0x00ffff |
| 0.8695E+02 | 0.6806E-04 | 0.2040E+04 | 0x00ffff |
| 0.8802E+02 | 0.5296E-04 | 0.2040E+04 | 0x00ffff |
| 0.8909E+02 | 0.3890E-04 | 0.2040E+04 | 0x00ffff |
| 0.9016E+02 | 0.4047E-04 | 0.2040E+04 | 0x00ffff |



V2\_Results\_baseline\_IEA\_delay.dat

|            |            |            |          |
|------------|------------|------------|----------|
| 0.9122E+02 | 0.3095E-04 | 0.2040E+04 | 0x00ffff |
| 0.9229E+02 | 0.2338E-04 | 0.2040E+04 | 0x00ffff |
| 0.9336E+02 | 0.3037E-04 | 0.2040E+04 | 0x00ffff |
| 0.9443E+02 | 0.2881E-04 | 0.2040E+04 | 0x00ffff |
| 0.9550E+02 | 0.2285E-04 | 0.2040E+04 | 0x00ffff |
| 0.9657E+02 | 0.1669E-04 | 0.2040E+04 | 0x00ffff |
| 0.9764E+02 | 0.1091E-04 | 0.2040E+04 | 0x00ffff |
| 0.9870E+02 | 0.8156E-05 | 0.2040E+04 | 0x00ffff |
| 0.9977E+02 | 0.6645E-05 | 0.2040E+04 | 0x00ffff |
| 0.1008E+03 | 0.3859E-05 | 0.2040E+04 | 0x00ffff |
| 0.1019E+03 | 0.3688E-05 | 0.2040E+04 | 0x00ffff |
| 0.1030E+03 | 0.6403E-06 | 0.2040E+04 | 0x00ffff |
| 0.1040E+03 | 0.0000E+00 | 0.2040E+04 | 0x00ffff |
| 0.1051E+03 | 0.0000E+00 | 0.2040E+04 | 0x00ffff |
| 0.1062E+03 | 0.0000E+00 | 0.2040E+04 | 0x00ffff |
| 0.1073E+03 | 0.0000E+00 | 0.2040E+04 | 0x00ffff |
| 0.1083E+03 | 0.0000E+00 | 0.2040E+04 | 0x00ffff |
| 0.1094E+03 | 0.2398E-05 | 0.2040E+04 | 0x00ffff |
| 0.1105E+03 | 0.4124E-05 | 0.2040E+04 | 0x00ffff |
|            |            |            |          |
| 0.2267E+02 | 0.2356E-04 | 0.2050E+04 | 0x0000ff |
| 0.2359E+02 | 0.7281E-04 | 0.2050E+04 | 0x0000ff |
| 0.2451E+02 | 0.1637E-03 | 0.2050E+04 | 0x0000ff |
| 0.2543E+02 | 0.3688E-03 | 0.2050E+04 | 0x0000ff |
| 0.2634E+02 | 0.7490E-03 | 0.2050E+04 | 0x0000ff |
| 0.2726E+02 | 0.1440E-02 | 0.2050E+04 | 0x0000ff |
| 0.2818E+02 | 0.2791E-02 | 0.2050E+04 | 0x0000ff |
| 0.2910E+02 | 0.4953E-02 | 0.2050E+04 | 0x0000ff |
| 0.3002E+02 | 0.7862E-02 | 0.2050E+04 | 0x0000ff |
| 0.3094E+02 | 0.1186E-01 | 0.2050E+04 | 0x0000ff |
| 0.3186E+02 | 0.1700E-01 | 0.2050E+04 | 0x0000ff |
| 0.3278E+02 | 0.2294E-01 | 0.2050E+04 | 0x0000ff |
| 0.3369E+02 | 0.2936E-01 | 0.2050E+04 | 0x0000ff |
| 0.3461E+02 | 0.3624E-01 | 0.2050E+04 | 0x0000ff |
| 0.3553E+02 | 0.4260E-01 | 0.2050E+04 | 0x0000ff |
| 0.3645E+02 | 0.4856E-01 | 0.2050E+04 | 0x0000ff |

V2\_Results\_baseline\_IEA\_delay.dat

|            |            |            |          |
|------------|------------|------------|----------|
| 0.3737E+02 | 0.5363E-01 | 0.2050E+04 | 0x0000ff |
| 0.3829E+02 | 0.5699E-01 | 0.2050E+04 | 0x0000ff |
| 0.3921E+02 | 0.5920E-01 | 0.2050E+04 | 0x0000ff |
| 0.4013E+02 | 0.6076E-01 | 0.2050E+04 | 0x0000ff |
| 0.4104E+02 | 0.6117E-01 | 0.2050E+04 | 0x0000ff |
| 0.4196E+02 | 0.6021E-01 | 0.2050E+04 | 0x0000ff |
| 0.4288E+02 | 0.5813E-01 | 0.2050E+04 | 0x0000ff |
| 0.4380E+02 | 0.5494E-01 | 0.2050E+04 | 0x0000ff |
| 0.4472E+02 | 0.5081E-01 | 0.2050E+04 | 0x0000ff |
| 0.4564E+02 | 0.4623E-01 | 0.2050E+04 | 0x0000ff |
| 0.4656E+02 | 0.4198E-01 | 0.2050E+04 | 0x0000ff |
| 0.4748E+02 | 0.3768E-01 | 0.2050E+04 | 0x0000ff |
| 0.4839E+02 | 0.3323E-01 | 0.2050E+04 | 0x0000ff |
| 0.4931E+02 | 0.2901E-01 | 0.2050E+04 | 0x0000ff |
| 0.5023E+02 | 0.2560E-01 | 0.2050E+04 | 0x0000ff |
| 0.5115E+02 | 0.2206E-01 | 0.2050E+04 | 0x0000ff |
| 0.5207E+02 | 0.1859E-01 | 0.2050E+04 | 0x0000ff |
| 0.5299E+02 | 0.1565E-01 | 0.2050E+04 | 0x0000ff |
| 0.5391E+02 | 0.1320E-01 | 0.2050E+04 | 0x0000ff |
| 0.5483E+02 | 0.1125E-01 | 0.2050E+04 | 0x0000ff |
| 0.5574E+02 | 0.9417E-02 | 0.2050E+04 | 0x0000ff |
| 0.5666E+02 | 0.7603E-02 | 0.2050E+04 | 0x0000ff |
| 0.5758E+02 | 0.6087E-02 | 0.2050E+04 | 0x0000ff |
| 0.5850E+02 | 0.5128E-02 | 0.2050E+04 | 0x0000ff |
| 0.5942E+02 | 0.4343E-02 | 0.2050E+04 | 0x0000ff |
| 0.6034E+02 | 0.3535E-02 | 0.2050E+04 | 0x0000ff |
| 0.6126E+02 | 0.2785E-02 | 0.2050E+04 | 0x0000ff |
| 0.6218E+02 | 0.2227E-02 | 0.2050E+04 | 0x0000ff |
| 0.6309E+02 | 0.1828E-02 | 0.2050E+04 | 0x0000ff |
| 0.6401E+02 | 0.1545E-02 | 0.2050E+04 | 0x0000ff |
| 0.6493E+02 | 0.1258E-02 | 0.2050E+04 | 0x0000ff |
| 0.6585E+02 | 0.9651E-03 | 0.2050E+04 | 0x0000ff |
| 0.6677E+02 | 0.8225E-03 | 0.2050E+04 | 0x0000ff |
| 0.6769E+02 | 0.7049E-03 | 0.2050E+04 | 0x0000ff |
| 0.6861E+02 | 0.5356E-03 | 0.2050E+04 | 0x0000ff |
| 0.6953E+02 | 0.3916E-03 | 0.2050E+04 | 0x0000ff |

# V2\_Results\_baseline\_IEA\_delay.dat

|            |            |            |          |
|------------|------------|------------|----------|
| 0.7044E+02 | 0.3357E-03 | 0.2050E+04 | 0x0000ff |
| 0.7136E+02 | 0.2907E-03 | 0.2050E+04 | 0x0000ff |
| 0.7228E+02 | 0.2458E-03 | 0.2050E+04 | 0x0000ff |
| 0.7320E+02 | 0.1802E-03 | 0.2050E+04 | 0x0000ff |
| 0.7412E+02 | 0.1396E-03 | 0.2050E+04 | 0x0000ff |
| 0.7504E+02 | 0.1226E-03 | 0.2050E+04 | 0x0000ff |
| 0.7596E+02 | 0.1100E-03 | 0.2050E+04 | 0x0000ff |
| 0.7687E+02 | 0.8221E-04 | 0.2050E+04 | 0x0000ff |
| 0.7779E+02 | 0.6337E-04 | 0.2050E+04 | 0x0000ff |
| 0.7871E+02 | 0.5276E-04 | 0.2050E+04 | 0x0000ff |
| 0.7963E+02 | 0.4468E-04 | 0.2050E+04 | 0x0000ff |
| 0.8055E+02 | 0.3383E-04 | 0.2050E+04 | 0x0000ff |
| 0.8147E+02 | 0.2817E-04 | 0.2050E+04 | 0x0000ff |
| 0.8239E+02 | 0.3599E-04 | 0.2050E+04 | 0x0000ff |
| 0.8331E+02 | 0.3742E-04 | 0.2050E+04 | 0x0000ff |
| 0.8422E+02 | 0.2759E-04 | 0.2050E+04 | 0x0000ff |
| 0.8514E+02 | 0.1531E-04 | 0.2050E+04 | 0x0000ff |
| 0.8606E+02 | 0.5774E-05 | 0.2050E+04 | 0x0000ff |
| 0.8698E+02 | 0.1976E-05 | 0.2050E+04 | 0x0000ff |
| 0.8790E+02 | 0.4103E-05 | 0.2050E+04 | 0x0000ff |
| 0.8882E+02 | 0.1795E-04 | 0.2050E+04 | 0x0000ff |
| 0.8974E+02 | 0.2519E-04 | 0.2050E+04 | 0x0000ff |
| 0.9066E+02 | 0.1838E-04 | 0.2050E+04 | 0x0000ff |
| 0.9157E+02 | 0.8267E-05 | 0.2050E+04 | 0x0000ff |
| 0.9249E+02 | 0.2958E-05 | 0.2050E+04 | 0x0000ff |
| 0.9341E+02 | 0.2080E-05 | 0.2050E+04 | 0x0000ff |
| 0.9433E+02 | 0.4441E-05 | 0.2050E+04 | 0x0000ff |
| 0.9525E+02 | 0.6744E-05 | 0.2050E+04 | 0x0000ff |
| 0.9617E+02 | 0.5054E-05 | 0.2050E+04 | 0x0000ff |

#       \*\*\*\*\*       Standardised       \*\*\*\*\*

|            |             |            |             |            |             |            |             |
|------------|-------------|------------|-------------|------------|-------------|------------|-------------|
| -200       | -0.3109E+01 | 0.9872E-04 | -0.3235E+01 | 0.3156E-04 | -0.3090E+01 | 0.8564E-04 | -0.2888E+01 |
| 0.1626E-03 |             |            |             |            |             |            |             |
| -195       | -0.2977E+01 | 0.1897E-03 | -0.3114E+01 | 0.5375E-04 | -0.2950E+01 | 0.1146E-03 | -0.2755E+01 |
| 0.5025E-03 |             |            |             |            |             |            |             |

# V2\_Results\_baseline IEA\_delay.dat

|            |             |            |             |            |             |            |             |
|------------|-------------|------------|-------------|------------|-------------|------------|-------------|
| -190       | -0.2844E+01 | 0.4051E-03 | -0.2993E+01 | 0.1204E-03 | -0.2811E+01 | 0.2249E-03 | -0.2622E+01 |
| 0.1130E-02 |             |            |             |            |             |            |             |
| -185       | -0.2712E+01 | 0.1005E-02 | -0.2872E+01 | 0.3089E-03 | -0.2671E+01 | 0.7995E-03 | -0.2488E+01 |
| 0.2545E-02 |             |            |             |            |             |            |             |
| -180       | -0.2579E+01 | 0.2256E-02 | -0.2751E+01 | 0.7513E-03 | -0.2531E+01 | 0.2278E-02 | -0.2355E+01 |
| 0.5169E-02 |             |            |             |            |             |            |             |
| -175       | -0.2446E+01 | 0.4810E-02 | -0.2629E+01 | 0.1817E-02 | -0.2391E+01 | 0.4746E-02 | -0.2222E+01 |
| 0.9941E-02 |             |            |             |            |             |            |             |
| -170       | -0.2314E+01 | 0.9557E-02 | -0.2508E+01 | 0.3615E-02 | -0.2252E+01 | 0.9723E-02 | -0.2089E+01 |
| 0.1926E-01 |             |            |             |            |             |            |             |
| -165       | -0.2181E+01 | 0.1789E-01 | -0.2387E+01 | 0.6777E-02 | -0.2112E+01 | 0.1835E-01 | -0.1956E+01 |
| 0.3418E-01 |             |            |             |            |             |            |             |
| -160       | -0.2049E+01 | 0.2946E-01 | -0.2266E+01 | 0.1186E-01 | -0.1972E+01 | 0.3361E-01 | -0.1823E+01 |
| 0.5426E-01 |             |            |             |            |             |            |             |
| -155       | -0.1916E+01 | 0.4578E-01 | -0.2145E+01 | 0.2002E-01 | -0.1833E+01 | 0.5383E-01 | -0.1690E+01 |
| 0.8187E-01 |             |            |             |            |             |            |             |
| -150       | -0.1784E+01 | 0.6753E-01 | -0.2023E+01 | 0.3155E-01 | -0.1693E+01 | 0.7975E-01 | -0.1557E+01 |
| 0.1173E+00 |             |            |             |            |             |            |             |
| -145       | -0.1651E+01 | 0.9656E-01 | -0.1902E+01 | 0.4816E-01 | -0.1553E+01 | 0.1154E+00 | -0.1423E+01 |
| 0.1583E+00 |             |            |             |            |             |            |             |
| -140       | -0.1519E+01 | 0.1308E+00 | -0.1781E+01 | 0.6991E-01 | -0.1413E+01 | 0.1607E+00 | -0.1290E+01 |
| 0.2026E+00 |             |            |             |            |             |            |             |
| -135       | -0.1386E+01 | 0.1695E+00 | -0.1660E+01 | 0.9533E-01 | -0.1274E+01 | 0.2104E+00 | -0.1157E+01 |
| 0.2501E+00 |             |            |             |            |             |            |             |
| -130       | -0.1254E+01 | 0.2119E+00 | -0.1539E+01 | 0.1240E+00 | -0.1134E+01 | 0.2582E+00 | -0.1024E+01 |
| 0.2940E+00 |             |            |             |            |             |            |             |
| -125       | -0.1121E+01 | 0.2578E+00 | -0.1418E+01 | 0.1583E+00 | -0.9942E+00 | 0.3022E+00 | -0.8909E+00 |
| 0.3352E+00 |             |            |             |            |             |            |             |
| -120       | -0.9887E+00 | 0.3003E+00 | -0.1296E+01 | 0.1969E+00 | -0.8544E+00 | 0.3410E+00 | -0.7578E+00 |
| 0.3701E+00 |             |            |             |            |             |            |             |
| -115       | -0.8561E+00 | 0.3352E+00 | -0.1175E+01 | 0.2382E+00 | -0.7147E+00 | 0.3751E+00 | -0.6247E+00 |
| 0.3933E+00 |             |            |             |            |             |            |             |
| -110       | -0.7236E+00 | 0.3625E+00 | -0.1054E+01 | 0.2780E+00 | -0.5750E+00 | 0.4025E+00 | -0.4915E+00 |
| 0.4085E+00 |             |            |             |            |             |            |             |
| -105       | -0.5911E+00 | 0.3851E+00 | -0.9329E+00 | 0.3123E+00 | -0.4353E+00 | 0.4189E+00 | -0.3584E+00 |
| 0.4193E+00 |             |            |             |            |             |            |             |

# V2\_Results\_baseline IEA\_delay.dat

|            |             |            |             |            |             |            |             |
|------------|-------------|------------|-------------|------------|-------------|------------|-------------|
| -100       | -0.4585E+00 | 0.4050E+00 | -0.8117E+00 | 0.3421E+00 | -0.2955E+00 | 0.4243E+00 | -0.2253E+00 |
| 0.4221E+00 |             |            |             |            |             |            |             |
| -95        | -0.3260E+00 | 0.4163E+00 | -0.6905E+00 | 0.3697E+00 | -0.1558E+00 | 0.4212E+00 | -0.9216E-01 |
| 0.4155E+00 |             |            |             |            |             |            |             |
| -90        | -0.1935E+00 | 0.4158E+00 | -0.5693E+00 | 0.3925E+00 | -0.1606E-01 | 0.4049E+00 | 0.4096E-01  |
| 0.4012E+00 |             |            |             |            |             |            |             |
| -85        | -0.6095E-01 | 0.4057E+00 | -0.4482E+00 | 0.4076E+00 | 0.1237E+00  | 0.3813E+00 | 0.1741E+00  |
| 0.3792E+00 |             |            |             |            |             |            |             |
| -80        | 0.7158E-01  | 0.3887E+00 | -0.3270E+00 | 0.4183E+00 | 0.2634E+00  | 0.3571E+00 | 0.3072E+00  |
| 0.3506E+00 |             |            |             |            |             |            |             |
| -75        | 0.2041E+00  | 0.3655E+00 | -0.2058E+00 | 0.4209E+00 | 0.4031E+00  | 0.3332E+00 | 0.4403E+00  |
| 0.3191E+00 |             |            |             |            |             |            |             |
| -70        | 0.3366E+00  | 0.3420E+00 | -0.8462E-01 | 0.4120E+00 | 0.5429E+00  | 0.3001E+00 | 0.5735E+00  |
| 0.2897E+00 |             |            |             |            |             |            |             |
| -65        | 0.4692E+00  | 0.3165E+00 | 0.3656E-01  | 0.3940E+00 | 0.6826E+00  | 0.2663E+00 | 0.7066E+00  |
| 0.2601E+00 |             |            |             |            |             |            |             |
| -60        | 0.6017E+00  | 0.2888E+00 | 0.1577E+00  | 0.3741E+00 | 0.8223E+00  | 0.2318E+00 | 0.8397E+00  |
| 0.2293E+00 |             |            |             |            |             |            |             |
| -55        | 0.7342E+00  | 0.2583E+00 | 0.2789E+00  | 0.3544E+00 | 0.9621E+00  | 0.2012E+00 | 0.9728E+00  |
| 0.2002E+00 |             |            |             |            |             |            |             |
| -50        | 0.8668E+00  | 0.2302E+00 | 0.4001E+00  | 0.3327E+00 | 0.1102E+01  | 0.1739E+00 | 0.1106E+01  |
| 0.1766E+00 |             |            |             |            |             |            |             |
| -45        | 0.9993E+00  | 0.2038E+00 | 0.5213E+00  | 0.3075E+00 | 0.1242E+01  | 0.1494E+00 | 0.1239E+01  |
| 0.1522E+00 |             |            |             |            |             |            |             |
| -40        | 0.1132E+01  | 0.1793E+00 | 0.6425E+00  | 0.2783E+00 | 0.1381E+01  | 0.1277E+00 | 0.1372E+01  |
| 0.1283E+00 |             |            |             |            |             |            |             |
| -35        | 0.1264E+01  | 0.1541E+00 | 0.7636E+00  | 0.2497E+00 | 0.1521E+01  | 0.1087E+00 | 0.1505E+01  |
| 0.1080E+00 |             |            |             |            |             |            |             |
| -30        | 0.1397E+01  | 0.1304E+00 | 0.8848E+00  | 0.2243E+00 | 0.1661E+01  | 0.9149E-01 | 0.1638E+01  |
| 0.9107E-01 |             |            |             |            |             |            |             |
| -25        | 0.1529E+01  | 0.1092E+00 | 0.1006E+01  | 0.2011E+00 | 0.1800E+01  | 0.7449E-01 | 0.1772E+01  |
| 0.7767E-01 |             |            |             |            |             |            |             |
| -20        | 0.1662E+01  | 0.9313E-01 | 0.1127E+01  | 0.1796E+00 | 0.1940E+01  | 0.6075E-01 | 0.1905E+01  |
| 0.6499E-01 |             |            |             |            |             |            |             |
| -15        | 0.1794E+01  | 0.7896E-01 | 0.1248E+01  | 0.1570E+00 | 0.2080E+01  | 0.5007E-01 | 0.2038E+01  |
| 0.5247E-01 |             |            |             |            |             |            |             |

| V2_Results_baseline IEA_delay.dat |            |            |            |            |            |            |            |
|-----------------------------------|------------|------------|------------|------------|------------|------------|------------|
| -10                               | 0.1927E+01 | 0.6556E-01 | 0.1370E+01 | 0.1349E+00 | 0.2220E+01 | 0.4099E-01 | 0.2171E+01 |
| 0.4201E-01                        |            |            |            |            |            |            |            |
| -5                                | 0.2060E+01 | 0.5283E-01 | 0.1491E+01 | 0.1142E+00 | 0.2359E+01 | 0.3211E-01 | 0.2304E+01 |
| 0.3539E-01                        |            |            |            |            |            |            |            |
| 0                                 | 0.2192E+01 | 0.4293E-01 | 0.1612E+01 | 0.9663E-01 | 0.2499E+01 | 0.2703E-01 | 0.2437E+01 |
| 0.2997E-01                        |            |            |            |            |            |            |            |
| 5                                 | 0.2325E+01 | 0.3479E-01 | 0.1733E+01 | 0.8153E-01 | 0.2639E+01 | 0.2267E-01 | 0.2570E+01 |
| 0.2440E-01                        |            |            |            |            |            |            |            |
| 10                                | 0.2457E+01 | 0.2799E-01 | 0.1854E+01 | 0.6959E-01 | 0.2779E+01 | 0.1784E-01 | 0.2703E+01 |
| 0.1922E-01                        |            |            |            |            |            |            |            |
| 15                                | 0.2590E+01 | 0.2286E-01 | 0.1975E+01 | 0.5998E-01 | 0.2918E+01 | 0.1368E-01 | 0.2837E+01 |
| 0.1537E-01                        |            |            |            |            |            |            |            |
| 20                                | 0.2722E+01 | 0.1844E-01 | 0.2097E+01 | 0.5226E-01 | 0.3058E+01 | 0.1102E-01 | 0.2970E+01 |
| 0.1262E-01                        |            |            |            |            |            |            |            |
| 25                                | 0.2855E+01 | 0.1469E-01 | 0.2218E+01 | 0.4345E-01 | 0.3198E+01 | 0.9363E-02 | 0.3103E+01 |
| 0.1067E-01                        |            |            |            |            |            |            |            |
| 30                                | 0.2987E+01 | 0.1144E-01 | 0.2339E+01 | 0.3512E-01 | 0.3337E+01 | 0.7831E-02 | 0.3236E+01 |
| 0.8683E-02                        |            |            |            |            |            |            |            |
| 35                                | 0.3120E+01 | 0.9190E-02 | 0.2460E+01 | 0.2851E-01 | 0.3477E+01 | 0.5923E-02 | 0.3369E+01 |
| 0.6660E-02                        |            |            |            |            |            |            |            |
| 40                                | 0.3252E+01 | 0.7644E-02 | 0.2581E+01 | 0.2399E-01 | 0.3617E+01 | 0.4408E-02 | 0.3502E+01 |
| 0.5676E-02                        |            |            |            |            |            |            |            |
| 45                                | 0.3385E+01 | 0.5974E-02 | 0.2702E+01 | 0.1951E-01 | 0.3757E+01 | 0.3686E-02 | 0.3635E+01 |
| 0.4864E-02                        |            |            |            |            |            |            |            |
| 50                                | 0.3517E+01 | 0.4434E-02 | 0.2824E+01 | 0.1540E-01 | 0.3896E+01 | 0.2872E-02 | 0.3768E+01 |
| 0.3696E-02                        |            |            |            |            |            |            |            |
| 55                                | 0.3650E+01 | 0.3341E-02 | 0.2945E+01 | 0.1217E-01 | 0.4036E+01 | 0.2161E-02 | 0.3902E+01 |
| 0.2702E-02                        |            |            |            |            |            |            |            |
| 60                                | 0.3782E+01 | 0.2851E-02 | 0.3066E+01 | 0.9784E-02 | 0.4176E+01 | 0.1720E-02 | 0.4035E+01 |
| 0.2317E-02                        |            |            |            |            |            |            |            |
| 65                                | 0.3915E+01 | 0.2409E-02 | 0.3187E+01 | 0.7728E-02 | 0.4316E+01 | 0.1398E-02 | 0.4168E+01 |
| 0.2006E-02                        |            |            |            |            |            |            |            |
| 70                                | 0.4047E+01 | 0.2136E-02 | 0.3308E+01 | 0.6319E-02 | 0.4455E+01 | 0.1055E-02 | 0.4301E+01 |
| 0.1696E-02                        |            |            |            |            |            |            |            |
| 75                                | 0.4180E+01 | 0.1724E-02 | 0.3430E+01 | 0.5082E-02 | 0.4595E+01 | 0.7361E-03 | 0.4434E+01 |
| 0.1244E-02                        |            |            |            |            |            |            |            |

| V2_Results_baseline_IEA_delay.dat |            |            |            |            |            |            |            |
|-----------------------------------|------------|------------|------------|------------|------------|------------|------------|
| 80                                | 0.4313E+01 | 0.1356E-02 | 0.3551E+01 | 0.4216E-02 | 0.4735E+01 | 0.6488E-03 | 0.4567E+01 |
| 0.9633E-03                        |            |            |            |            |            |            |            |
| 85                                | 0.4445E+01 | 0.9140E-03 | 0.3672E+01 | 0.3764E-02 | 0.4875E+01 | 0.6022E-03 | 0.4700E+01 |
| 0.8462E-03                        |            |            |            |            |            |            |            |
| 90                                | 0.4578E+01 | 0.5437E-03 | 0.3793E+01 | 0.3317E-02 | 0.5014E+01 | 0.5204E-03 | 0.4834E+01 |
| 0.7590E-03                        |            |            |            |            |            |            |            |
| 95                                | 0.4710E+01 | 0.3691E-03 | 0.3914E+01 | 0.2764E-02 | 0.5154E+01 | 0.4050E-03 | 0.4967E+01 |
| 0.5673E-03                        |            |            |            |            |            |            |            |
| 100                               | 0.4843E+01 | 0.3218E-03 | 0.4035E+01 | 0.2060E-02 | 0.5294E+01 | 0.2975E-03 | 0.5100E+01 |
| 0.4374E-03                        |            |            |            |            |            |            |            |
| 105                               | 0.4975E+01 | 0.2791E-03 | 0.4157E+01 | 0.1561E-02 | 0.5433E+01 | 0.3095E-03 | 0.5233E+01 |
| 0.3641E-03                        |            |            |            |            |            |            |            |
| 110                               | 0.5108E+01 | 0.1172E-03 | 0.4278E+01 | 0.1343E-02 | 0.5573E+01 | 0.2367E-03 | 0.5366E+01 |
| 0.3083E-03                        |            |            |            |            |            |            |            |
| 115                               | 0.5240E+01 | 0.3558E-04 | 0.4399E+01 | 0.1151E-02 | 0.5713E+01 | 0.1788E-03 | 0.5499E+01 |
| 0.2335E-03                        |            |            |            |            |            |            |            |
| 120                               | 0.5373E+01 | 0.1104E-03 | 0.4520E+01 | 0.8883E-03 | 0.5853E+01 | 0.2322E-03 | 0.5632E+01 |
| 0.1944E-03                        |            |            |            |            |            |            |            |
| 125                               | 0.5505E+01 | 0.1191E-03 | 0.4641E+01 | 0.7192E-03 | 0.5992E+01 | 0.2203E-03 | 0.5765E+01 |
| 0.2484E-03                        |            |            |            |            |            |            |            |
| 130                               | 0.5638E+01 | 0.7470E-04 | 0.4763E+01 | 0.5470E-03 | 0.6132E+01 | 0.1747E-03 | 0.5899E+01 |
| 0.2583E-03                        |            |            |            |            |            |            |            |
| 135                               | 0.5770E+01 | 0.9507E-04 | 0.4884E+01 | 0.4198E-03 | 0.6272E+01 | 0.1276E-03 | 0.6032E+01 |
| 0.1904E-03                        |            |            |            |            |            |            |            |
| 140                               | 0.5903E+01 | 0.1367E-03 | 0.5005E+01 | 0.2856E-03 | 0.6412E+01 | 0.8346E-04 | 0.6165E+01 |
| 0.1056E-03                        |            |            |            |            |            |            |            |
| 145                               | 0.6035E+01 | 0.9550E-04 | 0.5126E+01 | 0.1676E-03 | 0.6551E+01 | 0.6237E-04 | 0.6298E+01 |
| 0.3985E-04                        |            |            |            |            |            |            |            |
| 150                               | 0.6168E+01 | 0.2165E-04 | 0.5247E+01 | 0.1037E-03 | 0.6691E+01 | 0.5081E-04 | 0.6431E+01 |
| 0.1364E-04                        |            |            |            |            |            |            |            |
| 155                               | 0.6300E+01 | 0.0000E+00 | 0.5368E+01 | 0.9034E-04 | 0.6831E+01 | 0.2951E-04 | 0.6564E+01 |
| 0.2832E-04                        |            |            |            |            |            |            |            |
| 160                               | 0.6433E+01 | 0.0000E+00 | 0.5490E+01 | 0.7169E-04 | 0.6971E+01 | 0.2820E-04 | 0.6697E+01 |
| 0.1239E-03                        |            |            |            |            |            |            |            |
| 165                               | 0.6566E+01 | 0.0000E+00 | 0.5611E+01 | 0.7483E-04 | 0.7110E+01 | 0.4896E-05 | 0.6830E+01 |
| 0.1738E-03                        |            |            |            |            |            |            |            |

```

                                V2_Results_baseline_IEA_delay.dat
  170  0.6698E+01  0.0000E+00  0.5732E+01  0.9205E-04  0.7250E+01  0.0000E+00  0.6964E+01
0.1268E-03
  175  0.6831E+01  0.0000E+00  0.5853E+01  0.8302E-04  0.7390E+01  0.0000E+00  0.7097E+01
0.5705E-04
  180  0.6963E+01  0.0000E+00  0.5974E+01  0.3903E-04  0.7529E+01  0.0000E+00  0.7230E+01
0.2041E-04
  185  0.7096E+01  0.0000E+00  0.6096E+01  0.3009E-04  0.7669E+01  0.0000E+00  0.7363E+01
0.1435E-04
  190  0.7228E+01  0.0000E+00  0.6217E+01  0.2898E-04  0.7809E+01  0.0000E+00  0.7496E+01
0.3065E-04
  195  0.7361E+01  0.1967E-04  0.6338E+01  0.3296E-04  0.7949E+01  0.1834E-04  0.7629E+01
0.4654E-04
  200  0.7493E+01  0.3154E-04  0.6459E+01  0.3156E-04  0.8088E+01  0.3153E-04  0.7762E+01
0.3488E-04

```

```

#      *****      adaptados para un plot en 3D con gnuplot      *****

```

```

-0.3109E+01  0.9872E-04  0.2020E+04
-0.2977E+01  0.1897E-03  0.2020E+04
-0.2844E+01  0.4051E-03  0.2020E+04
-0.2712E+01  0.1005E-02  0.2020E+04
-0.2579E+01  0.2256E-02  0.2020E+04
-0.2446E+01  0.4810E-02  0.2020E+04
-0.2314E+01  0.9557E-02  0.2020E+04
-0.2181E+01  0.1789E-01  0.2020E+04
-0.2049E+01  0.2946E-01  0.2020E+04
-0.1916E+01  0.4578E-01  0.2020E+04
-0.1784E+01  0.6753E-01  0.2020E+04
-0.1651E+01  0.9656E-01  0.2020E+04
-0.1519E+01  0.1308E+00  0.2020E+04
-0.1386E+01  0.1695E+00  0.2020E+04
-0.1254E+01  0.2119E+00  0.2020E+04
-0.1121E+01  0.2578E+00  0.2020E+04
-0.9887E+00  0.3003E+00  0.2020E+04
-0.8561E+00  0.3352E+00  0.2020E+04
-0.7236E+00  0.3625E+00  0.2020E+04

```



V2\_Results\_baseline\_IEA\_delay.dat

|             |            |            |
|-------------|------------|------------|
| -0.5911E+00 | 0.3851E+00 | 0.2020E+04 |
| -0.4585E+00 | 0.4050E+00 | 0.2020E+04 |
| -0.3260E+00 | 0.4163E+00 | 0.2020E+04 |
| -0.1935E+00 | 0.4158E+00 | 0.2020E+04 |
| -0.6095E-01 | 0.4057E+00 | 0.2020E+04 |
| 0.7158E-01  | 0.3887E+00 | 0.2020E+04 |
| 0.2041E+00  | 0.3655E+00 | 0.2020E+04 |
| 0.3366E+00  | 0.3420E+00 | 0.2020E+04 |
| 0.4692E+00  | 0.3165E+00 | 0.2020E+04 |
| 0.6017E+00  | 0.2888E+00 | 0.2020E+04 |
| 0.7342E+00  | 0.2583E+00 | 0.2020E+04 |
| 0.8668E+00  | 0.2302E+00 | 0.2020E+04 |
| 0.9993E+00  | 0.2038E+00 | 0.2020E+04 |
| 0.1132E+01  | 0.1793E+00 | 0.2020E+04 |
| 0.1264E+01  | 0.1541E+00 | 0.2020E+04 |
| 0.1397E+01  | 0.1304E+00 | 0.2020E+04 |
| 0.1529E+01  | 0.1092E+00 | 0.2020E+04 |
| 0.1662E+01  | 0.9313E-01 | 0.2020E+04 |
| 0.1794E+01  | 0.7896E-01 | 0.2020E+04 |
| 0.1927E+01  | 0.6556E-01 | 0.2020E+04 |
| 0.2060E+01  | 0.5283E-01 | 0.2020E+04 |
| 0.2192E+01  | 0.4293E-01 | 0.2020E+04 |
| 0.2325E+01  | 0.3479E-01 | 0.2020E+04 |
| 0.2457E+01  | 0.2799E-01 | 0.2020E+04 |
| 0.2590E+01  | 0.2286E-01 | 0.2020E+04 |
| 0.2722E+01  | 0.1844E-01 | 0.2020E+04 |
| 0.2855E+01  | 0.1469E-01 | 0.2020E+04 |
| 0.2987E+01  | 0.1144E-01 | 0.2020E+04 |
| 0.3120E+01  | 0.9190E-02 | 0.2020E+04 |
| 0.3252E+01  | 0.7644E-02 | 0.2020E+04 |
| 0.3385E+01  | 0.5974E-02 | 0.2020E+04 |
| 0.3517E+01  | 0.4434E-02 | 0.2020E+04 |
| 0.3650E+01  | 0.3341E-02 | 0.2020E+04 |
| 0.3782E+01  | 0.2851E-02 | 0.2020E+04 |
| 0.3915E+01  | 0.2409E-02 | 0.2020E+04 |
| 0.4047E+01  | 0.2136E-02 | 0.2020E+04 |

V2\_Results\_baseline\_IEA\_delay.dat

|             |            |            |
|-------------|------------|------------|
| 0.4180E+01  | 0.1724E-02 | 0.2020E+04 |
| 0.4313E+01  | 0.1356E-02 | 0.2020E+04 |
| 0.4445E+01  | 0.9140E-03 | 0.2020E+04 |
| 0.4578E+01  | 0.5437E-03 | 0.2020E+04 |
| 0.4710E+01  | 0.3691E-03 | 0.2020E+04 |
| 0.4843E+01  | 0.3218E-03 | 0.2020E+04 |
| 0.4975E+01  | 0.2791E-03 | 0.2020E+04 |
| 0.5108E+01  | 0.1172E-03 | 0.2020E+04 |
| 0.5240E+01  | 0.3558E-04 | 0.2020E+04 |
| 0.5373E+01  | 0.1104E-03 | 0.2020E+04 |
| 0.5505E+01  | 0.1191E-03 | 0.2020E+04 |
| 0.5638E+01  | 0.7470E-04 | 0.2020E+04 |
| 0.5770E+01  | 0.9507E-04 | 0.2020E+04 |
| 0.5903E+01  | 0.1367E-03 | 0.2020E+04 |
| 0.6035E+01  | 0.9550E-04 | 0.2020E+04 |
| 0.6168E+01  | 0.2165E-04 | 0.2020E+04 |
| 0.6300E+01  | 0.0000E+00 | 0.2020E+04 |
| 0.6433E+01  | 0.0000E+00 | 0.2020E+04 |
| 0.6566E+01  | 0.0000E+00 | 0.2020E+04 |
| 0.6698E+01  | 0.0000E+00 | 0.2020E+04 |
| 0.6831E+01  | 0.0000E+00 | 0.2020E+04 |
| 0.6963E+01  | 0.0000E+00 | 0.2020E+04 |
| 0.7096E+01  | 0.0000E+00 | 0.2020E+04 |
| 0.7228E+01  | 0.0000E+00 | 0.2020E+04 |
| 0.7361E+01  | 0.1967E-04 | 0.2020E+04 |
| 0.7493E+01  | 0.3154E-04 | 0.2020E+04 |
|             |            |            |
| -0.3235E+01 | 0.3156E-04 | 0.2030E+04 |
| -0.3114E+01 | 0.5375E-04 | 0.2030E+04 |
| -0.2993E+01 | 0.1204E-03 | 0.2030E+04 |
| -0.2872E+01 | 0.3089E-03 | 0.2030E+04 |
| -0.2751E+01 | 0.7513E-03 | 0.2030E+04 |
| -0.2629E+01 | 0.1817E-02 | 0.2030E+04 |
| -0.2508E+01 | 0.3615E-02 | 0.2030E+04 |
| -0.2387E+01 | 0.6777E-02 | 0.2030E+04 |
| -0.2266E+01 | 0.1186E-01 | 0.2030E+04 |

V2\_Results\_baseline\_IEA\_delay.dat

|             |            |            |
|-------------|------------|------------|
| -0.2145E+01 | 0.2002E-01 | 0.2030E+04 |
| -0.2023E+01 | 0.3155E-01 | 0.2030E+04 |
| -0.1902E+01 | 0.4816E-01 | 0.2030E+04 |
| -0.1781E+01 | 0.6991E-01 | 0.2030E+04 |
| -0.1660E+01 | 0.9533E-01 | 0.2030E+04 |
| -0.1539E+01 | 0.1240E+00 | 0.2030E+04 |
| -0.1418E+01 | 0.1583E+00 | 0.2030E+04 |
| -0.1296E+01 | 0.1969E+00 | 0.2030E+04 |
| -0.1175E+01 | 0.2382E+00 | 0.2030E+04 |
| -0.1054E+01 | 0.2780E+00 | 0.2030E+04 |
| -0.9329E+00 | 0.3123E+00 | 0.2030E+04 |
| -0.8117E+00 | 0.3421E+00 | 0.2030E+04 |
| -0.6905E+00 | 0.3697E+00 | 0.2030E+04 |
| -0.5693E+00 | 0.3925E+00 | 0.2030E+04 |
| -0.4482E+00 | 0.4076E+00 | 0.2030E+04 |
| -0.3270E+00 | 0.4183E+00 | 0.2030E+04 |
| -0.2058E+00 | 0.4209E+00 | 0.2030E+04 |
| -0.8462E-01 | 0.4120E+00 | 0.2030E+04 |
| 0.3656E-01  | 0.3940E+00 | 0.2030E+04 |
| 0.1577E+00  | 0.3741E+00 | 0.2030E+04 |
| 0.2789E+00  | 0.3544E+00 | 0.2030E+04 |
| 0.4001E+00  | 0.3327E+00 | 0.2030E+04 |
| 0.5213E+00  | 0.3075E+00 | 0.2030E+04 |
| 0.6425E+00  | 0.2783E+00 | 0.2030E+04 |
| 0.7636E+00  | 0.2497E+00 | 0.2030E+04 |
| 0.8848E+00  | 0.2243E+00 | 0.2030E+04 |
| 0.1006E+01  | 0.2011E+00 | 0.2030E+04 |
| 0.1127E+01  | 0.1796E+00 | 0.2030E+04 |
| 0.1248E+01  | 0.1570E+00 | 0.2030E+04 |
| 0.1370E+01  | 0.1349E+00 | 0.2030E+04 |
| 0.1491E+01  | 0.1142E+00 | 0.2030E+04 |
| 0.1612E+01  | 0.9663E-01 | 0.2030E+04 |
| 0.1733E+01  | 0.8153E-01 | 0.2030E+04 |
| 0.1854E+01  | 0.6959E-01 | 0.2030E+04 |
| 0.1975E+01  | 0.5998E-01 | 0.2030E+04 |
| 0.2097E+01  | 0.5226E-01 | 0.2030E+04 |

V2\_Results\_baseline\_IEA\_delay.dat

|            |            |            |
|------------|------------|------------|
| 0.2218E+01 | 0.4345E-01 | 0.2030E+04 |
| 0.2339E+01 | 0.3512E-01 | 0.2030E+04 |
| 0.2460E+01 | 0.2851E-01 | 0.2030E+04 |
| 0.2581E+01 | 0.2399E-01 | 0.2030E+04 |
| 0.2702E+01 | 0.1951E-01 | 0.2030E+04 |
| 0.2824E+01 | 0.1540E-01 | 0.2030E+04 |
| 0.2945E+01 | 0.1217E-01 | 0.2030E+04 |
| 0.3066E+01 | 0.9784E-02 | 0.2030E+04 |
| 0.3187E+01 | 0.7728E-02 | 0.2030E+04 |
| 0.3308E+01 | 0.6319E-02 | 0.2030E+04 |
| 0.3430E+01 | 0.5082E-02 | 0.2030E+04 |
| 0.3551E+01 | 0.4216E-02 | 0.2030E+04 |
| 0.3672E+01 | 0.3764E-02 | 0.2030E+04 |
| 0.3793E+01 | 0.3317E-02 | 0.2030E+04 |
| 0.3914E+01 | 0.2764E-02 | 0.2030E+04 |
| 0.4035E+01 | 0.2060E-02 | 0.2030E+04 |
| 0.4157E+01 | 0.1561E-02 | 0.2030E+04 |
| 0.4278E+01 | 0.1343E-02 | 0.2030E+04 |
| 0.4399E+01 | 0.1151E-02 | 0.2030E+04 |
| 0.4520E+01 | 0.8883E-03 | 0.2030E+04 |
| 0.4641E+01 | 0.7192E-03 | 0.2030E+04 |
| 0.4763E+01 | 0.5470E-03 | 0.2030E+04 |
| 0.4884E+01 | 0.4198E-03 | 0.2030E+04 |
| 0.5005E+01 | 0.2856E-03 | 0.2030E+04 |
| 0.5126E+01 | 0.1676E-03 | 0.2030E+04 |
| 0.5247E+01 | 0.1037E-03 | 0.2030E+04 |
| 0.5368E+01 | 0.9034E-04 | 0.2030E+04 |
| 0.5490E+01 | 0.7169E-04 | 0.2030E+04 |
| 0.5611E+01 | 0.7483E-04 | 0.2030E+04 |
| 0.5732E+01 | 0.9205E-04 | 0.2030E+04 |
| 0.5853E+01 | 0.8302E-04 | 0.2030E+04 |
| 0.5974E+01 | 0.3903E-04 | 0.2030E+04 |
| 0.6096E+01 | 0.3009E-04 | 0.2030E+04 |
| 0.6217E+01 | 0.2898E-04 | 0.2030E+04 |
| 0.6338E+01 | 0.3296E-04 | 0.2030E+04 |
| 0.6459E+01 | 0.3156E-04 | 0.2030E+04 |

V2\_Results\_baseline\_IEA\_delay.dat

|             |            |            |
|-------------|------------|------------|
| -0.3090E+01 | 0.8564E-04 | 0.2040E+04 |
| -0.2950E+01 | 0.1146E-03 | 0.2040E+04 |
| -0.2811E+01 | 0.2249E-03 | 0.2040E+04 |
| -0.2671E+01 | 0.7995E-03 | 0.2040E+04 |
| -0.2531E+01 | 0.2278E-02 | 0.2040E+04 |
| -0.2391E+01 | 0.4746E-02 | 0.2040E+04 |
| -0.2252E+01 | 0.9723E-02 | 0.2040E+04 |
| -0.2112E+01 | 0.1835E-01 | 0.2040E+04 |
| -0.1972E+01 | 0.3361E-01 | 0.2040E+04 |
| -0.1833E+01 | 0.5383E-01 | 0.2040E+04 |
| -0.1693E+01 | 0.7975E-01 | 0.2040E+04 |
| -0.1553E+01 | 0.1154E+00 | 0.2040E+04 |
| -0.1413E+01 | 0.1607E+00 | 0.2040E+04 |
| -0.1274E+01 | 0.2104E+00 | 0.2040E+04 |
| -0.1134E+01 | 0.2582E+00 | 0.2040E+04 |
| -0.9942E+00 | 0.3022E+00 | 0.2040E+04 |
| -0.8544E+00 | 0.3410E+00 | 0.2040E+04 |
| -0.7147E+00 | 0.3751E+00 | 0.2040E+04 |
| -0.5750E+00 | 0.4025E+00 | 0.2040E+04 |
| -0.4353E+00 | 0.4189E+00 | 0.2040E+04 |
| -0.2955E+00 | 0.4243E+00 | 0.2040E+04 |
| -0.1558E+00 | 0.4212E+00 | 0.2040E+04 |
| -0.1606E-01 | 0.4049E+00 | 0.2040E+04 |
| 0.1237E+00  | 0.3813E+00 | 0.2040E+04 |
| 0.2634E+00  | 0.3571E+00 | 0.2040E+04 |
| 0.4031E+00  | 0.3332E+00 | 0.2040E+04 |
| 0.5429E+00  | 0.3001E+00 | 0.2040E+04 |
| 0.6826E+00  | 0.2663E+00 | 0.2040E+04 |
| 0.8223E+00  | 0.2318E+00 | 0.2040E+04 |
| 0.9621E+00  | 0.2012E+00 | 0.2040E+04 |
| 0.1102E+01  | 0.1739E+00 | 0.2040E+04 |
| 0.1242E+01  | 0.1494E+00 | 0.2040E+04 |
| 0.1381E+01  | 0.1277E+00 | 0.2040E+04 |
| 0.1521E+01  | 0.1087E+00 | 0.2040E+04 |
| 0.1661E+01  | 0.9149E-01 | 0.2040E+04 |

V2\_Results\_baseline\_IEA\_delay.dat

|            |            |            |
|------------|------------|------------|
| 0.1800E+01 | 0.7449E-01 | 0.2040E+04 |
| 0.1940E+01 | 0.6075E-01 | 0.2040E+04 |
| 0.2080E+01 | 0.5007E-01 | 0.2040E+04 |
| 0.2220E+01 | 0.4099E-01 | 0.2040E+04 |
| 0.2359E+01 | 0.3211E-01 | 0.2040E+04 |
| 0.2499E+01 | 0.2703E-01 | 0.2040E+04 |
| 0.2639E+01 | 0.2267E-01 | 0.2040E+04 |
| 0.2779E+01 | 0.1784E-01 | 0.2040E+04 |
| 0.2918E+01 | 0.1368E-01 | 0.2040E+04 |
| 0.3058E+01 | 0.1102E-01 | 0.2040E+04 |
| 0.3198E+01 | 0.9363E-02 | 0.2040E+04 |
| 0.3337E+01 | 0.7831E-02 | 0.2040E+04 |
| 0.3477E+01 | 0.5923E-02 | 0.2040E+04 |
| 0.3617E+01 | 0.4408E-02 | 0.2040E+04 |
| 0.3757E+01 | 0.3686E-02 | 0.2040E+04 |
| 0.3896E+01 | 0.2872E-02 | 0.2040E+04 |
| 0.4036E+01 | 0.2161E-02 | 0.2040E+04 |
| 0.4176E+01 | 0.1720E-02 | 0.2040E+04 |
| 0.4316E+01 | 0.1398E-02 | 0.2040E+04 |
| 0.4455E+01 | 0.1055E-02 | 0.2040E+04 |
| 0.4595E+01 | 0.7361E-03 | 0.2040E+04 |
| 0.4735E+01 | 0.6488E-03 | 0.2040E+04 |
| 0.4875E+01 | 0.6022E-03 | 0.2040E+04 |
| 0.5014E+01 | 0.5204E-03 | 0.2040E+04 |
| 0.5154E+01 | 0.4050E-03 | 0.2040E+04 |
| 0.5294E+01 | 0.2975E-03 | 0.2040E+04 |
| 0.5433E+01 | 0.3095E-03 | 0.2040E+04 |
| 0.5573E+01 | 0.2367E-03 | 0.2040E+04 |
| 0.5713E+01 | 0.1788E-03 | 0.2040E+04 |
| 0.5853E+01 | 0.2322E-03 | 0.2040E+04 |
| 0.5992E+01 | 0.2203E-03 | 0.2040E+04 |
| 0.6132E+01 | 0.1747E-03 | 0.2040E+04 |
| 0.6272E+01 | 0.1276E-03 | 0.2040E+04 |
| 0.6412E+01 | 0.8346E-04 | 0.2040E+04 |
| 0.6551E+01 | 0.6237E-04 | 0.2040E+04 |
| 0.6691E+01 | 0.5081E-04 | 0.2040E+04 |

V2\_Results\_baseline\_IEA\_delay.dat

|             |            |            |
|-------------|------------|------------|
| 0.6831E+01  | 0.2951E-04 | 0.2040E+04 |
| 0.6971E+01  | 0.2820E-04 | 0.2040E+04 |
| 0.7110E+01  | 0.4896E-05 | 0.2040E+04 |
| 0.7250E+01  | 0.0000E+00 | 0.2040E+04 |
| 0.7390E+01  | 0.0000E+00 | 0.2040E+04 |
| 0.7529E+01  | 0.0000E+00 | 0.2040E+04 |
| 0.7669E+01  | 0.0000E+00 | 0.2040E+04 |
| 0.7809E+01  | 0.0000E+00 | 0.2040E+04 |
| 0.7949E+01  | 0.1834E-04 | 0.2040E+04 |
| 0.8088E+01  | 0.3153E-04 | 0.2040E+04 |
|             |            |            |
| -0.2888E+01 | 0.1626E-03 | 0.2050E+04 |
| -0.2755E+01 | 0.5025E-03 | 0.2050E+04 |
| -0.2622E+01 | 0.1130E-02 | 0.2050E+04 |
| -0.2488E+01 | 0.2545E-02 | 0.2050E+04 |
| -0.2355E+01 | 0.5169E-02 | 0.2050E+04 |
| -0.2222E+01 | 0.9941E-02 | 0.2050E+04 |
| -0.2089E+01 | 0.1926E-01 | 0.2050E+04 |
| -0.1956E+01 | 0.3418E-01 | 0.2050E+04 |
| -0.1823E+01 | 0.5426E-01 | 0.2050E+04 |
| -0.1690E+01 | 0.8187E-01 | 0.2050E+04 |
| -0.1557E+01 | 0.1173E+00 | 0.2050E+04 |
| -0.1423E+01 | 0.1583E+00 | 0.2050E+04 |
| -0.1290E+01 | 0.2026E+00 | 0.2050E+04 |
| -0.1157E+01 | 0.2501E+00 | 0.2050E+04 |
| -0.1024E+01 | 0.2940E+00 | 0.2050E+04 |
| -0.8909E+00 | 0.3352E+00 | 0.2050E+04 |
| -0.7578E+00 | 0.3701E+00 | 0.2050E+04 |
| -0.6247E+00 | 0.3933E+00 | 0.2050E+04 |
| -0.4915E+00 | 0.4085E+00 | 0.2050E+04 |
| -0.3584E+00 | 0.4193E+00 | 0.2050E+04 |
| -0.2253E+00 | 0.4221E+00 | 0.2050E+04 |
| -0.9216E-01 | 0.4155E+00 | 0.2050E+04 |
| 0.4096E-01  | 0.4012E+00 | 0.2050E+04 |
| 0.1741E+00  | 0.3792E+00 | 0.2050E+04 |
| 0.3072E+00  | 0.3506E+00 | 0.2050E+04 |

V2\_Results\_baseline\_IEA\_delay.dat

|            |            |            |
|------------|------------|------------|
| 0.4403E+00 | 0.3191E+00 | 0.2050E+04 |
| 0.5735E+00 | 0.2897E+00 | 0.2050E+04 |
| 0.7066E+00 | 0.2601E+00 | 0.2050E+04 |
| 0.8397E+00 | 0.2293E+00 | 0.2050E+04 |
| 0.9728E+00 | 0.2002E+00 | 0.2050E+04 |
| 0.1106E+01 | 0.1766E+00 | 0.2050E+04 |
| 0.1239E+01 | 0.1522E+00 | 0.2050E+04 |
| 0.1372E+01 | 0.1283E+00 | 0.2050E+04 |
| 0.1505E+01 | 0.1080E+00 | 0.2050E+04 |
| 0.1638E+01 | 0.9107E-01 | 0.2050E+04 |
| 0.1772E+01 | 0.7767E-01 | 0.2050E+04 |
| 0.1905E+01 | 0.6499E-01 | 0.2050E+04 |
| 0.2038E+01 | 0.5247E-01 | 0.2050E+04 |
| 0.2171E+01 | 0.4201E-01 | 0.2050E+04 |
| 0.2304E+01 | 0.3539E-01 | 0.2050E+04 |
| 0.2437E+01 | 0.2997E-01 | 0.2050E+04 |
| 0.2570E+01 | 0.2440E-01 | 0.2050E+04 |
| 0.2703E+01 | 0.1922E-01 | 0.2050E+04 |
| 0.2837E+01 | 0.1537E-01 | 0.2050E+04 |
| 0.2970E+01 | 0.1262E-01 | 0.2050E+04 |
| 0.3103E+01 | 0.1067E-01 | 0.2050E+04 |
| 0.3236E+01 | 0.8683E-02 | 0.2050E+04 |
| 0.3369E+01 | 0.6660E-02 | 0.2050E+04 |
| 0.3502E+01 | 0.5676E-02 | 0.2050E+04 |
| 0.3635E+01 | 0.4864E-02 | 0.2050E+04 |
| 0.3768E+01 | 0.3696E-02 | 0.2050E+04 |
| 0.3902E+01 | 0.2702E-02 | 0.2050E+04 |
| 0.4035E+01 | 0.2317E-02 | 0.2050E+04 |
| 0.4168E+01 | 0.2006E-02 | 0.2050E+04 |
| 0.4301E+01 | 0.1696E-02 | 0.2050E+04 |
| 0.4434E+01 | 0.1244E-02 | 0.2050E+04 |
| 0.4567E+01 | 0.9633E-03 | 0.2050E+04 |
| 0.4700E+01 | 0.8462E-03 | 0.2050E+04 |
| 0.4834E+01 | 0.7590E-03 | 0.2050E+04 |
| 0.4967E+01 | 0.5673E-03 | 0.2050E+04 |
| 0.5100E+01 | 0.4374E-03 | 0.2050E+04 |



V2\_Results\_baseline\_IEA\_delay.dat

|            |            |            |
|------------|------------|------------|
| 0.5233E+01 | 0.3641E-03 | 0.2050E+04 |
| 0.5366E+01 | 0.3083E-03 | 0.2050E+04 |
| 0.5499E+01 | 0.2335E-03 | 0.2050E+04 |
| 0.5632E+01 | 0.1944E-03 | 0.2050E+04 |
| 0.5765E+01 | 0.2484E-03 | 0.2050E+04 |
| 0.5899E+01 | 0.2583E-03 | 0.2050E+04 |
| 0.6032E+01 | 0.1904E-03 | 0.2050E+04 |
| 0.6165E+01 | 0.1056E-03 | 0.2050E+04 |
| 0.6298E+01 | 0.3985E-04 | 0.2050E+04 |
| 0.6431E+01 | 0.1364E-04 | 0.2050E+04 |
| 0.6564E+01 | 0.2832E-04 | 0.2050E+04 |
| 0.6697E+01 | 0.1239E-03 | 0.2050E+04 |
| 0.6830E+01 | 0.1738E-03 | 0.2050E+04 |
| 0.6964E+01 | 0.1268E-03 | 0.2050E+04 |
| 0.7097E+01 | 0.5705E-04 | 0.2050E+04 |
| 0.7230E+01 | 0.2041E-04 | 0.2050E+04 |
| 0.7363E+01 | 0.1435E-04 | 0.2050E+04 |
| 0.7496E+01 | 0.3065E-04 | 0.2050E+04 |
| 0.7629E+01 | 0.4654E-04 | 0.2050E+04 |
| 0.7762E+01 | 0.3488E-04 | 0.2050E+04 |

```

#*****
#*****          AVOIDED CARBON VALUES ($ tr.)          *****
#*****
# Valued at:    1 US$,    Social Carbon Cost,    Tax IEA,    Tax S.S.
               0.1355E+00    0.2072E+01    0.2025E+02    0.1009E+02

```

```

#*****
#*****          CAPOPEX (all; tr. US$): SUMMARY STATISTICS          *****
#*****

```

MEAN, VARIANCE, SKW, KURT & MAX. VALUES 50%, 80%, 90%, 95%

|           |           |           |           |           |           |           |           |
|-----------|-----------|-----------|-----------|-----------|-----------|-----------|-----------|
| 0.911E+01 | 0.142E+01 | 0.530E+00 | 0.356E+01 | 0.900E+01 | 0.101E+02 | 0.107E+02 | 0.112E+02 |
|-----------|-----------|-----------|-----------|-----------|-----------|-----------|-----------|

# V2\_Results\_baseline\_IEA\_delay.dat

CapOpStrEx EXPECT. / ( CapOpStrEx > CapOpStrEx max. al 80%, 90%, 95%)

0.1077E+02 0.1147E+02 0.1192E+02

\*\*\*\*\*  
 #\*\*\*\*\* CAPITAL COSTS - AVOIDED CARBON VALUES (US\$ tr.) \*\*\*\*\*  
 #\*\*\*\*\*

# Valued at: 1 US\$, Social Carbon Cost, Tax IEA, Tax S.S.  
 0.8978E+01 0.7041E+01 -0.1114E+02 -0.9801E+00

\*\*\*\*\*  
 #\*\*\*\*\* CAPITAL PRICES (USD/1W) \*\*\*\*\*  
 #\*\*\*\*\*

# MEANS, VARIANCES & MAX. VALUES 50%, 80%, 90%, 95%  
 # ALL YEARS: 2015-2050

|      |           |           |           |           |           |           |
|------|-----------|-----------|-----------|-----------|-----------|-----------|
| 2015 | 0.130E+01 | 0.680E-01 | 0.127E+01 | 0.149E+01 | 0.163E+01 | 0.176E+01 |
| 2016 | 0.166E+01 | 0.937E-01 | 0.163E+01 | 0.190E+01 | 0.206E+01 | 0.220E+01 |
| 2017 | 0.167E+01 | 0.956E-01 | 0.164E+01 | 0.192E+01 | 0.208E+01 | 0.222E+01 |
| 2018 | 0.167E+01 | 0.942E-01 | 0.164E+01 | 0.191E+01 | 0.207E+01 | 0.221E+01 |
| 2019 | 0.168E+01 | 0.969E-01 | 0.165E+01 | 0.192E+01 | 0.209E+01 | 0.224E+01 |
| 2020 | 0.170E+01 | 0.101E+00 | 0.167E+01 | 0.195E+01 | 0.211E+01 | 0.226E+01 |
| 2021 | 0.170E+01 | 0.998E-01 | 0.166E+01 | 0.195E+01 | 0.211E+01 | 0.225E+01 |
| 2022 | 0.174E+01 | 0.109E+00 | 0.171E+01 | 0.200E+01 | 0.217E+01 | 0.233E+01 |
| 2023 | 0.174E+01 | 0.109E+00 | 0.171E+01 | 0.200E+01 | 0.218E+01 | 0.233E+01 |
| 2024 | 0.174E+01 | 0.110E+00 | 0.171E+01 | 0.200E+01 | 0.217E+01 | 0.233E+01 |
| 2025 | 0.176E+01 | 0.112E+00 | 0.172E+01 | 0.202E+01 | 0.219E+01 | 0.235E+01 |
| 2026 | 0.176E+01 | 0.113E+00 | 0.172E+01 | 0.202E+01 | 0.220E+01 | 0.236E+01 |
| 2027 | 0.175E+01 | 0.111E+00 | 0.172E+01 | 0.201E+01 | 0.218E+01 | 0.234E+01 |
| 2028 | 0.176E+01 | 0.114E+00 | 0.173E+01 | 0.203E+01 | 0.220E+01 | 0.237E+01 |
| 2029 | 0.176E+01 | 0.113E+00 | 0.172E+01 | 0.202E+01 | 0.220E+01 | 0.235E+01 |

V2\_Results\_baseline\_IEA\_delay.dat

|      |           |           |           |           |           |           |
|------|-----------|-----------|-----------|-----------|-----------|-----------|
| 2030 | 0.175E+01 | 0.110E+00 | 0.171E+01 | 0.201E+01 | 0.219E+01 | 0.234E+01 |
| 2031 | 0.113E+01 | 0.563E-01 | 0.110E+01 | 0.131E+01 | 0.144E+01 | 0.156E+01 |
| 2032 | 0.107E+01 | 0.492E-01 | 0.104E+01 | 0.123E+01 | 0.135E+01 | 0.146E+01 |
| 2033 | 0.102E+01 | 0.445E-01 | 0.997E+00 | 0.118E+01 | 0.130E+01 | 0.140E+01 |
| 2034 | 0.989E+00 | 0.411E-01 | 0.966E+00 | 0.114E+01 | 0.125E+01 | 0.135E+01 |
| 2035 | 0.965E+00 | 0.388E-01 | 0.940E+00 | 0.112E+01 | 0.122E+01 | 0.131E+01 |
| 2036 | 0.952E+00 | 0.371E-01 | 0.931E+00 | 0.110E+01 | 0.120E+01 | 0.130E+01 |
| 2037 | 0.922E+00 | 0.356E-01 | 0.902E+00 | 0.107E+01 | 0.117E+01 | 0.126E+01 |
| 2038 | 0.911E+00 | 0.343E-01 | 0.891E+00 | 0.105E+01 | 0.115E+01 | 0.124E+01 |
| 2039 | 0.898E+00 | 0.333E-01 | 0.876E+00 | 0.104E+01 | 0.114E+01 | 0.122E+01 |
| 2040 | 0.852E+00 | 0.313E-01 | 0.830E+00 | 0.987E+00 | 0.108E+01 | 0.117E+01 |
| 2041 | 0.852E+00 | 0.309E-01 | 0.833E+00 | 0.986E+00 | 0.108E+01 | 0.116E+01 |
| 2042 | 0.869E+00 | 0.312E-01 | 0.850E+00 | 0.100E+01 | 0.110E+01 | 0.118E+01 |
| 2043 | 0.751E+00 | 0.277E-01 | 0.728E+00 | 0.873E+00 | 0.963E+00 | 0.105E+01 |
| 2044 | 0.739E+00 | 0.266E-01 | 0.719E+00 | 0.859E+00 | 0.950E+00 | 0.103E+01 |
| 2045 | 0.692E+00 | 0.255E-01 | 0.671E+00 | 0.807E+00 | 0.895E+00 | 0.980E+00 |
| 2046 | 0.760E+00 | 0.263E-01 | 0.737E+00 | 0.882E+00 | 0.966E+00 | 0.105E+01 |
| 2047 | 0.751E+00 | 0.257E-01 | 0.730E+00 | 0.872E+00 | 0.959E+00 | 0.104E+01 |
| 2048 | 0.743E+00 | 0.253E-01 | 0.723E+00 | 0.861E+00 | 0.949E+00 | 0.103E+01 |
| 2049 | 0.737E+00 | 0.249E-01 | 0.716E+00 | 0.857E+00 | 0.940E+00 | 0.102E+01 |
| 2050 | 0.729E+00 | 0.244E-01 | 0.710E+00 | 0.847E+00 | 0.932E+00 | 0.101E+01 |

#####  
#\*\*\*\*\* TOTAL COSTS USD/W: TIMELINE BREAKDOWN \*\*\*\*\*  
#\*\*\*\*\*

| #    | PV cap.(Mod+inv) | PV BoS   | PV Str   | W cap.   | W BoS    | W Str    |      |
|------|------------------|----------|----------|----------|----------|----------|------|
| 2015 | 0.386221         | 0.279606 | 0.122530 | 0.636433 | 0.272757 | 0.127387 | 2015 |
| 2016 | 0.096620         | 0.068699 | 0.029501 | 1.095307 | 0.469417 | 0.210724 |      |
| 2017 | 0.087199         | 0.060752 | 0.025565 | 1.110100 | 0.475757 | 0.205344 |      |
| 2018 | 0.091364         | 0.062447 | 0.025752 | 1.103168 | 0.472786 | 0.196203 |      |
| 2019 | 0.079051         | 0.052949 | 0.021397 | 1.122729 | 0.481170 | 0.191951 |      |
| 2020 | 0.064448         | 0.042306 | 0.016753 | 1.145844 | 0.491076 | 0.188321 | 2020 |
| 2021 | 0.069306         | 0.044579 | 0.017299 | 1.138971 | 0.488130 | 0.179822 |      |
| 2022 | 0.031778         | 0.020091 | 0.007640 | 1.197395 | 0.513169 | 0.181837 |      |

| V2_Results_baseline_IEA_delay.dat |          |          |          |          |          |          |
|-----------------------------------|----------|----------|----------|----------|----------|----------|
| 2023                              | 0.032009 | 0.019832 | 0.007390 | 1.197762 | 0.513327 | 0.174739 |
| 2024                              | 0.030973 | 0.018795 | 0.006863 | 1.199128 | 0.513912 | 0.168203 |
| 2025                              | 0.021045 | 0.012549 | 0.004490 | 1.214915 | 0.520678 | 0.163786 |
| 2026                              | 0.019287 | 0.011264 | 0.003950 | 1.217659 | 0.521854 | 0.157801 |
| 2027                              | 0.025887 | 0.014848 | 0.005102 | 1.206906 | 0.517246 | 0.150376 |
| 2028                              | 0.014981 | 0.008430 | 0.002839 | 1.224554 | 0.524809 | 0.146610 |
| 2029                              | 0.020243 | 0.011168 | 0.003685 | 1.216878 | 0.521519 | 0.139968 |
| 2030                              | 0.025119 | 0.013624 | 0.004405 | 1.208742 | 0.518032 | 0.133677 |
| 2031                              | 0.354948 | 0.225586 | 0.071479 | 0.545263 | 0.233684 | 0.061249 |
| 2032                              | 0.315827 | 0.220251 | 0.068388 | 0.525754 | 0.225323 | 0.059192 |
| 2033                              | 0.287775 | 0.213593 | 0.064990 | 0.515023 | 0.220724 | 0.057642 |
| 2034                              | 0.266274 | 0.207428 | 0.061848 | 0.505774 | 0.216760 | 0.056029 |
| 2035                              | 0.249326 | 0.200682 | 0.058636 | 0.500638 | 0.214559 | 0.054669 |
| 2036                              | 0.231426 | 0.191293 | 0.054772 | 0.504676 | 0.216290 | 0.054140 |
| 2037                              | 0.225643 | 0.190469 | 0.053441 | 0.487405 | 0.208888 | 0.051247 |
| 2038                              | 0.213842 | 0.183588 | 0.050477 | 0.487898 | 0.209099 | 0.050151 |
| 2039                              | 0.204216 | 0.177927 | 0.047939 | 0.485620 | 0.208123 | 0.048787 |
| 2040                              | 0.211342 | 0.185645 | 0.049015 | 0.448410 | 0.192176 | 0.043960 |
| 2041                              | 0.199758 | 0.176895 | 0.045768 | 0.456649 | 0.195707 | 0.043601 |
| 2042                              | 0.183209 | 0.162906 | 0.041303 | 0.479782 | 0.205621 | 0.044601 |
| 2043                              | 0.221488 | 0.197482 | 0.049065 | 0.370547 | 0.158806 | 0.033508 |
| 2044                              | 0.217019 | 0.194040 | 0.047242 | 0.365535 | 0.156658 | 0.032128 |
| 2045                              | 0.227296 | 0.203258 | 0.048494 | 0.325578 | 0.139533 | 0.027799 |
| 2046                              | 0.194255 | 0.173262 | 0.040508 | 0.395928 | 0.169683 | 0.032826 |
| 2047                              | 0.190649 | 0.169880 | 0.038920 | 0.392399 | 0.168171 | 0.031569 |
| 2048                              | 0.187616 | 0.166628 | 0.037409 | 0.389015 | 0.166721 | 0.030347 |
| 2049                              | 0.184444 | 0.163049 | 0.035871 | 0.386841 | 0.165789 | 0.029257 |
| 2050                              | 0.181556 | 0.159923 | 0.034478 | 0.383334 | 0.164286 | 0.028125 |
