# Supplementary material
Source: MDPI journal article supplement (https://www.mdpi.com/1996-1073/12/15/2875)
Supplement: s1 [file s1]

|          |          |                     |   |
|----------|----------|---------------------|---|
| 0.984    | 1.00     | Basic_data_wind.dat |   |
| 0.022500 | 0.019286 | 0.78                |   |
| 0.0500   | 15       |                     |   |
| T        |          |                     |   |
| T        | T        |                     |   |
| 2        |          |                     |   |
| F        | F        | T                   | T |
| F        | F        |                     |   |
