# Supplementary material
Source: MDPI journal article supplement (https://www.mdpi.com/1996-1073/12/15/2875)
Supplement: s1 [file s1]

Irena\_rm\_pv\_wind\_GW.dat

|      |          |            |
|------|----------|------------|
| 2015 | 405.022  | 0.2300E+03 |
| 2016 | 584.094  | 0.4126E+03 |
| 2017 | 748.727  | 0.5948E+03 |
| 2018 | 910.898  | 0.7765E+03 |
| 2019 | 1070.609 | 0.9577E+03 |
| 2020 | 1227.859 | 0.1138E+04 |
| 2021 | 1382.647 | 0.1319E+04 |
| 2022 | 1534.975 | 0.1499E+04 |
| 2023 | 1684.842 | 0.1678E+04 |
| 2024 | 1832.248 | 0.1857E+04 |
| 2025 | 1977.193 | 0.2036E+04 |
| 2026 | 2119.677 | 0.2214E+04 |
| 2027 | 2259.700 | 0.2391E+04 |
| 2028 | 2397.262 | 0.2568E+04 |
| 2029 | 2532.363 | 0.2745E+04 |
| 2030 | 2665.003 | 0.2921E+04 |
| 2031 | 2795.182 | 0.3097E+04 |
| 2032 | 2922.900 | 0.3272E+04 |
| 2033 | 3048.158 | 0.3447E+04 |
| 2034 | 3170.954 | 0.3621E+04 |
| 2035 | 3291.289 | 0.3795E+04 |
| 2036 | 3409.164 | 0.3968E+04 |
| 2037 | 3524.577 | 0.4141E+04 |
| 2038 | 3637.530 | 0.4314E+04 |
| 2039 | 3748.021 | 0.4486E+04 |
| 2040 | 3856.052 | 0.4658E+04 |
| 2041 | 3961.621 | 0.4829E+04 |
| 2042 | 4064.730 | 0.4999E+04 |
| 2043 | 4165.377 | 0.5169E+04 |
| 2044 | 4263.564 | 0.5339E+04 |
| 2045 | 4359.290 | 0.5508E+04 |
| 2046 | 4452.554 | 0.5677E+04 |
| 2047 | 4543.358 | 0.5846E+04 |
| 2048 | 4631.701 | 0.6014E+04 |
| 2049 | 4717.583 | 0.6181E+04 |
| 2050 | 4801.004 | 0.6348E+04 |

Irena\_rm\_pv\_wind\_GW.dat
