# Supplementary material
Source: MDPI journal article supplement (https://www.mdpi.com/1996-1073/12/15/2875)
Supplement: s1 [file s1]

V1\_Results\_baseline\_T\_3D\_2050\_salteado.dat

# \*\*\* CASO: 1, IEA ; 2, Irena : 1

#n° de simulaciones = 100000

# \*\*\*\*\* Parámetros Wind \*\*\*\*\*

#medias ec. precio Turbinas : 2.9666 -0.1860  
 #dev. est. parámetros ec. precio Turbinas : 0.0000 0.0130  
 #dev. est. ec. precio Turbinas : 0.0900  
 #valor inicial en 2014 de Cap 340.6110  
 #depreciación, Performance Ratio, kgCO2 0.984 1.000 0.780  
 #Life Span de los Turbinas 27  
 #Social Discount Rate 0.022500 0.019286  
 #WACC, Loan Maturity 0.050 15  
 #Generación aleatoria de los parámetros = T  
 #Generación aleatoria de los errs. de las ecs. = T  
 #Storage costs tenido en cuenta = T  
 #Modelo Precio Turbinas (1, old; 2, simple; 3, LR dec.; 4, LR +dec. 2

# \*\*\*\*\* Parámetros PV \*\*\*\*\*

#medias ec. precio módulos : 3.6025 -0.3200  
 #dev. est. parámetros ec. precio módulos : 0.1710 0.0240  
 #dev. est. ec. precio módulos : 0.3300  
 #valores iniciales en 2014 de Cap, Pe, Pm, Ps, upm : 157.7609 0.8229 0.7050  
 0.0760 0.0000  
 #depreciación, Performance Ratio, kgCO2 : 0.990 0.850 0.780  
 #Life Span de los módulos : 30  
 #Social Discount Rate : 0.022500 0.019286  
 #WACC, Loan Maturity : 0.090 7  
 #Generación aleatoria de los parámetros = T  
 #Generación aleatoria de los errs. de las ecs. = T  
 #Storage costs tenido en cuenta = T  
 #Modelo Precio módulos (1, old; 2, simple; 3, LR dec.; 4, LR +dec. : 2

# V1\_Results\_baseline\_T\_3D\_2050\_salteado.dat

```

#*****
#***  p.d.f. LCE (US$/MWh): TOTAL 2020, 2030, 2040 ,2050 (Smoothed, Not standardised) ***
#*****
#          2020          2030          2040          2050
#  *****      NOT standardised      *****
#  *****      adaptados para un plot en 3D con gnuplot      *****

#          2050

0.2335E+02  0.2363E-04  0.2050E+04  0x0000ff
0.2703E+02  0.7539E-03  0.2050E+04  0x0000ff
0.3070E+02  0.7921E-02  0.2050E+04  0x0000ff
0.3438E+02  0.2953E-01  0.2050E+04  0x0000ff
0.3806E+02  0.5379E-01  0.2050E+04  0x0000ff
0.4174E+02  0.6120E-01  0.2050E+04  0x0000ff
0.4542E+02  0.5066E-01  0.2050E+04  0x0000ff
0.4910E+02  0.3304E-01  0.2050E+04  0x0000ff
0.5277E+02  0.1844E-01  0.2050E+04  0x0000ff
0.5645E+02  0.9316E-02  0.2050E+04  0x0000ff
0.6013E+02  0.4300E-02  0.2050E+04  0x0000ff
0.6381E+02  0.1806E-02  0.2050E+04  0x0000ff
0.6749E+02  0.8151E-03  0.2050E+04  0x0000ff

```

|            |            | V1_Results_baseline_T_3D_2050_salteado.dat |          |
|------------|------------|--------------------------------------------|----------|
| 0.7116E+02 | 0.3332E-03 | 0.2050E+04                                 | 0x0000ff |
| 0.7484E+02 | 0.1410E-03 | 0.2050E+04                                 | 0x0000ff |
| 0.7852E+02 | 0.6136E-04 | 0.2050E+04                                 | 0x0000ff |
| 0.8220E+02 | 0.2822E-04 | 0.2050E+04                                 | 0x0000ff |
| 0.8588E+02 | 0.1443E-04 | 0.2050E+04                                 | 0x0000ff |
| 0.8956E+02 | 0.1838E-04 | 0.2050E+04                                 | 0x0000ff |
| 0.9323E+02 | 0.2946E-05 | 0.2050E+04                                 | 0x0000ff |
| 0.9691E+02 | 0.4672E-05 | 0.2050E+04                                 | 0x0000ff |
