# Supplementary material
Source: MDPI journal article supplement (https://www.mdpi.com/1996-1073/12/15/2875)
Supplement: s1 [file s1]

pdf\_T\_risks\_stats\_median.dat

```
# *** CASO: 1, IEA ; 2, Irena :      1

#nº de simulaciones =      100000

#      *****      Parámetros Wind      *****

#medias ec. precio Turbinas :          2.9666      -0.1860
#dev. est. parámetros ec. precio Turbinas :          0.0000      0.0130
#dev. est. ec. precio Turbinas :          0.0900
#valor inicial en 2014 de Cap      340.6110
#depreciación, Performance Ratio, kgCO2          0.984      1.000      0.780
#Life Span de los Turbinas      27
#Social Discount Rate 0.022500 0.019286
#WACC, Loan Maturity      0.050  15
#Generación aleatoria de los parámetros = T
#Generación aleatoria de los errs. de las ecs. = T
#Storage costs tenido en cuenta = T
#Modelo Precio Turbinas (1, old; 2, simple; 3, LR dec.; 4, LR +dec.      2

#      *****      Parámetros PV      *****

#medias ec. precio módulos :          3.6025      -0.3200
#dev. est. parámetros ec. precio módulos :          0.1710      0.0240
#dev. est. ec. precio módulos :          0.3300
#valores iniciales en 2014 de Cap, Pe, Pm, Ps, upm :          157.7609      0.8229      0.7050
0.0760      0.0000
#depreciación, Performance Ratio, kgCO2 :          0.990      0.850      0.780
#Life Span de los módulos :      30
#Social Discount Rate : 0.022500 0.019286
#WACC, Loan Maturity :      0.090  7
#Generación aleatoria de los parámetros = T
#Generación aleatoria de los errs. de las ecs. = T
#Storage costs tenido en cuenta = T
#Modelo Precio módulos (1, old; 2, simple; 3, LR dec.; 4, LR +dec. :      2
```

## pdf\_T\_risks\_stats\_median.dat

```

#*****
# p.d.f. & C.d.f LCE (US$/MWh): TOTAL, PV, WIND (Smoothed, NOT standardised)
#*****
#          Total          PV          Wind
#
#          *****          NOT standardised          *****
#
-200  0.3199E+02  0.4527E-05  0.7678E-06  0.1432E+00  0.0000E+00  0.2210E-05  0.2847E+02
0.7126E-05  0.1824E-05
-195  0.3284E+02  0.6672E-05  0.5103E-05  0.1576E+01  0.0000E+00  0.9846E-05  0.2975E+02
0.1700E-04  0.1789E-04
-190  0.3369E+02  0.2313E-04  0.1788E-04  0.3008E+01  0.0000E+00  0.1001E-04  0.3103E+02
0.4821E-04  0.5964E-04
-185  0.3453E+02  0.4609E-04  0.5028E-04  0.4440E+01  0.0000E+00  0.1001E-04  0.3231E+02
0.1167E-03  0.1692E-03
-180  0.3538E+02  0.6612E-04  0.9835E-04  0.5873E+01  0.0000E+00  0.1001E-04  0.3359E+02
0.2614E-03  0.4182E-03
-175  0.3623E+02  0.1322E-03  0.1848E-03  0.7305E+01  0.0000E+00  0.1001E-04  0.3487E+02
0.4973E-03  0.9245E-03
-170  0.3708E+02  0.3132E-03  0.3772E-03  0.8738E+01  0.0000E+00  0.1001E-04  0.3615E+02
0.8459E-03  0.1815E-02
-165  0.3793E+02  0.5811E-03  0.7738E-03  0.1017E+02  0.0000E+00  0.1001E-04  0.3743E+02
0.1435E-02  0.3321E-02
-160  0.3877E+02  0.9886E-03  0.1457E-02  0.1160E+02  0.0000E+00  0.1001E-04  0.3871E+02
0.2282E-02  0.5776E-02
-155  0.3962E+02  0.1658E-02  0.2615E-02  0.1303E+02  0.0000E+00  0.1001E-04  0.3999E+02
0.3525E-02  0.9611E-02
-150  0.4047E+02  0.2817E-02  0.4577E-02  0.1447E+02  0.0000E+00  0.1001E-04  0.4127E+02
0.5100E-02  0.1531E-01
-145  0.4132E+02  0.4417E-02  0.7744E-02  0.1590E+02  0.0000E+00  0.1001E-04  0.4255E+02
0.7138E-02  0.2336E-01
-140  0.4217E+02  0.6662E-02  0.1259E-01  0.1733E+02  0.0000E+00  0.1001E-04  0.4383E+02
0.9525E-02  0.3428E-01
-135  0.4302E+02  0.9424E-02  0.1961E-01  0.1876E+02  0.0000E+00  0.1001E-04  0.4511E+02
0.1240E-01  0.4861E-01

```

| pdf_T_risks_stats_median.dat |            |            |            |            |            |            |            |
|------------------------------|------------|------------|------------|------------|------------|------------|------------|
| -130                         | 0.4386E+02 | 0.1294E-01 | 0.2933E-01 | 0.2020E+02 | 0.0000E+00 | 0.1001E-04 | 0.4639E+02 |
| 0.1584E-01                   | 0.6708E-01 |            |            |            |            |            |            |
| -125                         | 0.4471E+02 | 0.1698E-01 | 0.4230E-01 | 0.2163E+02 | 0.0000E+00 | 0.1001E-04 | 0.4767E+02 |
| 0.1968E-01                   | 0.9029E-01 |            |            |            |            |            |            |
| -120                         | 0.4556E+02 | 0.2179E-01 | 0.5913E-01 | 0.2306E+02 | 0.0000E+00 | 0.1001E-04 | 0.4895E+02 |
| 0.2354E-01                   | 0.1184E+00 |            |            |            |            |            |            |
| -115                         | 0.4641E+02 | 0.2689E-01 | 0.8017E-01 | 0.2449E+02 | 0.0000E+00 | 0.1001E-04 | 0.5023E+02 |
| 0.2712E-01                   | 0.1513E+00 |            |            |            |            |            |            |
| -110                         | 0.4726E+02 | 0.3249E-01 | 0.1058E+00 | 0.2593E+02 | 0.0000E+00 | 0.1001E-04 | 0.5151E+02 |
| 0.3019E-01                   | 0.1885E+00 |            |            |            |            |            |            |
| -105                         | 0.4810E+02 | 0.3793E-01 | 0.1362E+00 | 0.2736E+02 | 0.0000E+00 | 0.1001E-04 | 0.5279E+02 |
| 0.3278E-01                   | 0.2291E+00 |            |            |            |            |            |            |
| -100                         | 0.4895E+02 | 0.4310E-01 | 0.1710E+00 | 0.2879E+02 | 0.0000E+00 | 0.1001E-04 | 0.5407E+02 |
| 0.3491E-01                   | 0.2728E+00 |            |            |            |            |            |            |
| -95                          | 0.4980E+02 | 0.4780E-01 | 0.2100E+00 | 0.3022E+02 | 0.1191E-05 | 0.1035E-04 | 0.5535E+02 |
| 0.3632E-01                   | 0.3186E+00 |            |            |            |            |            |            |
| -90                          | 0.5065E+02 | 0.5171E-01 | 0.2525E+00 | 0.3166E+02 | 0.1228E-03 | 0.8915E-04 | 0.5663E+02 |
| 0.3754E-01                   | 0.3660E+00 |            |            |            |            |            |            |
| -85                          | 0.5150E+02 | 0.5459E-01 | 0.2980E+00 | 0.3309E+02 | 0.7943E-03 | 0.7214E-03 | 0.5791E+02 |
| 0.3850E-01                   | 0.4148E+00 |            |            |            |            |            |            |
| -80                          | 0.5234E+02 | 0.5669E-01 | 0.3454E+00 | 0.3452E+02 | 0.3502E-02 | 0.3870E-02 | 0.5919E+02 |
| 0.3890E-01                   | 0.4645E+00 |            |            |            |            |            |            |
| -75                          | 0.5319E+02 | 0.5817E-01 | 0.3943E+00 | 0.3595E+02 | 0.9576E-02 | 0.1371E-01 | 0.6047E+02 |
| 0.3811E-01                   | 0.5138E+00 |            |            |            |            |            |            |
| -70                          | 0.5404E+02 | 0.5864E-01 | 0.4439E+00 | 0.3739E+02 | 0.1897E-01 | 0.3509E-01 | 0.6175E+02 |
| 0.3659E-01                   | 0.5615E+00 |            |            |            |            |            |            |
| -65                          | 0.5489E+02 | 0.5822E-01 | 0.4935E+00 | 0.3882E+02 | 0.3053E-01 | 0.7212E-01 | 0.6303E+02 |
| 0.3487E-01                   | 0.6070E+00 |            |            |            |            |            |            |
