# Supplementary material
Source: MDPI journal article supplement (https://www.mdpi.com/1996-1073/12/15/2875)
Supplement: s1 [file s1]

Archive with 50 entries (44 files):
- supplementary material/
- supplementary material/Plots/
- supplementary material/Plots/1, 4, 5/
- supplementary material/Plots/1, 4, 5/Fig.1.txt.pdf
- supplementary material/Plots/1, 4, 5/Fig.4.dat.pdf
- supplementary material/Plots/1, 4, 5/Fig.4.txt.pdf
- supplementary material/Plots/1, 4, 5/Fig.5.dat.pdf
- supplementary material/Plots/1, 4, 5/Fig.5.txt.pdf
- supplementary material/Plots/1, 4, 5/IEA_Fig.1.dat.pdf
- supplementary material/Plots/1, 4, 5/Irena_Fig.1.dat.pdf
- supplementary material/Plots/2/
- supplementary material/Plots/2/Fig.2.5pc_tail.dat.pdf
- supplementary material/Plots/2/Fig.2.dat.pdf
- supplementary material/Plots/2/Fig.2.median.dat.pdf
- supplementary material/Plots/2/Fig.2.txt.pdf
- supplementary material/Plots/3/
- supplementary material/Plots/3/multiplot_years.txt.pdf
- supplementary material/Plots/3/V1_Results_baseline.dat.pdf
- supplementary material/Plots/3/V1_Results_baseline_T_3D_2020.dat.pdf
- supplementary material/Plots/3/V1_Results_baseline_T_3D_2020_salteado.dat.pdf
- supplementary material/Plots/3/V1_Results_baseline_T_3D_2030 - copia.dat.pdf
- supplementary material/Plots/3/V1_Results_baseline_T_3D_2030.dat.pdf
- supplementary material/Plots/3/V1_Results_baseline_T_3D_2030_salteado - copia.dat.pdf
- supplementary material/Plots/3/V1_Results_baseline_T_3D_2030_salteado.dat.pdf
- supplementary material/Plots/3/V1_Results_baseline_T_3D_2040 - copia.dat.pdf
- supplementary material/Plots/3/V1_Results_baseline_T_3D_2040.dat.pdf
- supplementary material/Plots/3/V1_Results_baseline_T_3D_2040_salteado - copia.dat.pdf
- supplementary material/Plots/3/V1_Results_baseline_T_3D_2040_salteado.dat.pdf
- supplementary material/Plots/3/V1_Results_baseline_T_3D_2050.dat.pdf
- supplementary material/Plots/3/V1_Results_baseline_T_3D_2050_salteado.dat.pdf
- supplementary material/Plots/3/V1_Results_baseline_T_years.dat.pdf
- supplementary material/Plots/Read me.docx
- supplementary material/Programs and data/
- supplementary material/Programs and data/A_Basic_data_PV.pdf
- supplementary material/Programs and data/A_IEA_PVRm_2050.pdf
- supplementary material/Programs and data/A_Irena_PVRm_2050.dat.pdf
- supplementary material/Programs and data/Basic_data_wind.dat.pdf
- supplementary material/Programs and data/calc_sel.dat.pdf
- supplementary material/Programs and data/CWh_IEA_GW.dat.pdf
- supplementary material/Programs and data/CWh_Irena_GW.dat.pdf
- supplementary material/Programs and data/CW_historico_MW.dat.pdf
- supplementary material/Programs and data/Read me.docx
- supplementary material/Programs and data/Sim_PV_Wind_Irena_Iea_w1.pdf
- supplementary material/Programs and data/Sim_PV_Wind_Irena_Iea_w2.pdf
- supplementary material/Programs and data/V1_Results_baseline_IEA.pdf
- supplementary material/Programs and data/V1_Results_baseline_Irena.pdf
- supplementary material/Programs and data/V2_Results_baseline_IEA_accel.pdf
- supplementary material/Programs and data/V2_Results_baseline_IEA_delay.pdf
- supplementary material/Programs and data/V2_Results_baseline_Irena_accel.pdf
- supplementary material/Programs and data/V2_Results_baseline_Irena_delay.pdf
