# Supplementary material
Source: MDPI journal article supplement (https://www.mdpi.com/1996-1073/12/15/2875)
Supplement: s1 [file s1]

CW\_historico\_MW.dat

|      |        |
|------|--------|
| 1985 | 1020   |
| 1986 | 1270   |
| 1987 | 1450   |
| 1988 | 1580   |
| 1989 | 1730   |
| 1990 | 1930   |
| 1991 | 2170   |
| 1992 | 2510   |
| 1993 | 2990   |
| 1994 | 3490   |
| 1995 | 4780   |
| 1996 | 6097   |
| 1997 | 7592   |
| 1998 | 10200  |
| 1999 | 13500  |
| 2000 | 16863  |
| 2001 | 23825  |
| 2002 | 30491  |
| 2003 | 38138  |
| 2004 | 47057  |
| 2005 | 57653  |
| 2006 | 72228  |
| 2007 | 90538  |
| 2008 | 113922 |
| 2009 | 147962 |
| 2010 | 177747 |
| 2011 | 216185 |
| 2012 | 261525 |
| 2013 | 292630 |
| 2014 | 340611 |
| 2015 | 405022 |
| 2016 | 453146 |
| 2017 | 494821 |
