# Supplementary material
Source: MDPI journal article supplement (https://www.mdpi.com/1996-1073/12/15/2875)
Supplement: s1 [file s1]

CWh\_IEA\_GW.dat

|      |          |
|------|----------|
| 2015 | 417.000  |
| 2016 | 483.600  |
| 2017 | 555.762  |
| 2018 | 633.485  |
| 2019 | 716.771  |
| 2020 | 805.618  |
| 2021 | 900.028  |
| 2022 | 999.999  |
| 2023 | 1105.532 |
| 2024 | 1216.627 |
| 2025 | 1333.284 |
| 2026 | 1455.503 |
| 2027 | 1583.284 |
| 2028 | 1716.626 |
| 2029 | 1855.531 |
| 2030 | 1999.997 |
| 2031 | 2105.720 |
| 2032 | 2207.149 |
| 2033 | 2304.293 |
| 2034 | 2397.150 |
| 2035 | 2485.722 |
| 2036 | 2570.008 |
| 2037 | 2650.008 |
| 2038 | 2725.723 |
| 2039 | 2797.151 |
| 2040 | 2864.295 |
| 2041 | 2927.152 |
| 2042 | 2985.724 |
| 2043 | 3040.010 |
| 2044 | 3090.010 |
| 2045 | 3135.725 |
| 2046 | 3177.153 |
| 2047 | 3214.296 |
| 2048 | 3247.154 |
| 2049 | 3275.726 |
| 2050 | 3300.011 |
