# Supplementary material
Source: MDPI journal article supplement (https://www.mdpi.com/1996-1073/12/15/2875)
Supplement: s1 [file s1]

# V1\_Results\_baseline\_T\_3D\_2040.dat

# \*\*\* CASO: 1, IEA ; 2, Irena : 1

#n° de simulaciones = 100000

# \*\*\*\*\* Parámetros Wind \*\*\*\*\*

#medias ec. precio Turbinas : 2.9666 -0.1860  
 #dev. est. parámetros ec. precio Turbinas : 0.0000 0.0130  
 #dev. est. ec. precio Turbinas : 0.0900  
 #valor inicial en 2014 de Cap 340.6110  
 #depreciación, Performance Ratio, kgCO2 0.984 1.000 0.780  
 #Life Span de los Turbinas 27  
 #Social Discount Rate 0.022500 0.019286  
 #WACC, Loan Maturity 0.050 15  
 #Generación aleatoria de los parámetros = T  
 #Generación aleatoria de los errs. de las ecs. = T  
 #Storage costs tenido en cuenta = T  
 #Modelo Precio Turbinas (1, old; 2, simple; 3, LR dec.; 4, LR +dec. 2

# \*\*\*\*\* Parámetros PV \*\*\*\*\*

#medias ec. precio módulos : 3.6025 -0.3200  
 #dev. est. parámetros ec. precio módulos : 0.1710 0.0240  
 #dev. est. ec. precio módulos : 0.3300  
 #valores iniciales en 2014 de Cap, Pe, Pm, Ps, upm : 157.7609 0.8229 0.7050  
 0.0760 0.0000  
 #depreciación, Performance Ratio, kgCO2 : 0.990 0.850 0.780  
 #Life Span de los módulos : 30  
 #Social Discount Rate : 0.022500 0.019286  
 #WACC, Loan Maturity : 0.090 7  
 #Generación aleatoria de los parámetros = T  
 #Generación aleatoria de los errs. de las ecs. = T  
 #Storage costs tenido en cuenta = T  
 #Modelo Precio módulos (1, old; 2, simple; 3, LR dec.; 4, LR +dec. : 2

# V1\_Results\_baseline\_T\_3D\_2040.dat

```

#*****
#***  p.d.f. LCE (US$/MWh): TOTAL 2020, 2030, 2040 ,2050 (Smoothed, Not standardised) ***
#*****
#          2020          2030          2040          2050
#  *****      NOT standardised      *****
#  *****      adaptados para un plot en 3D con gnuplot      *****

#          2040

0.2543E+02  0.1213E-04  0.2040E+04  0x00ffff
0.2642E+02  0.1666E-04  0.2040E+04  0x00ffff
0.2741E+02  0.3412E-04  0.2040E+04  0x00ffff
0.2840E+02  0.1187E-03  0.2040E+04  0x00ffff
0.2938E+02  0.3373E-03  0.2040E+04  0x00ffff
0.3037E+02  0.7095E-03  0.2040E+04  0x00ffff
0.3136E+02  0.1453E-02  0.2040E+04  0x00ffff
0.3235E+02  0.2779E-02  0.2040E+04  0x00ffff
0.3334E+02  0.5010E-02  0.2040E+04  0x00ffff
0.3433E+02  0.7998E-02  0.2040E+04  0x00ffff
0.3532E+02  0.1178E-01  0.2040E+04  0x00ffff
0.3631E+02  0.1709E-01  0.2040E+04  0x00ffff
0.3730E+02  0.2368E-01  0.2040E+04  0x00ffff
0.3828E+02  0.3079E-01  0.2040E+04  0x00ffff
0.3927E+02  0.3747E-01  0.2040E+04  0x00ffff
0.4026E+02  0.4363E-01  0.2040E+04  0x00ffff
0.4125E+02  0.4906E-01  0.2040E+04  0x00ffff
0.4224E+02  0.5374E-01  0.2040E+04  0x00ffff
0.4323E+02  0.5738E-01  0.2040E+04  0x00ffff
0.4422E+02  0.5950E-01  0.2040E+04  0x00ffff
0.4521E+02  0.6003E-01  0.2040E+04  0x00ffff
0.4620E+02  0.5936E-01  0.2040E+04  0x00ffff
0.4719E+02  0.5673E-01  0.2040E+04  0x00ffff
0.4817E+02  0.5337E-01  0.2040E+04  0x00ffff
0.4916E+02  0.4994E-01  0.2040E+04  0x00ffff
0.5015E+02  0.4638E-01  0.2040E+04  0x00ffff

```

V1\_Results\_baseline\_T\_3D\_2040.dat

|            |            |            |          |
|------------|------------|------------|----------|
| 0.5114E+02 | 0.4171E-01 | 0.2040E+04 | 0x00ffff |
| 0.5213E+02 | 0.3683E-01 | 0.2040E+04 | 0x00ffff |
| 0.5312E+02 | 0.3206E-01 | 0.2040E+04 | 0x00ffff |
| 0.5411E+02 | 0.2786E-01 | 0.2040E+04 | 0x00ffff |
| 0.5510E+02 | 0.2402E-01 | 0.2040E+04 | 0x00ffff |
| 0.5609E+02 | 0.2060E-01 | 0.2040E+04 | 0x00ffff |
| 0.5707E+02 | 0.1761E-01 | 0.2040E+04 | 0x00ffff |
| 0.5806E+02 | 0.1499E-01 | 0.2040E+04 | 0x00ffff |
| 0.5905E+02 | 0.1261E-01 | 0.2040E+04 | 0x00ffff |
| 0.6004E+02 | 0.1020E-01 | 0.2040E+04 | 0x00ffff |
| 0.6103E+02 | 0.8363E-02 | 0.2040E+04 | 0x00ffff |
| 0.6202E+02 | 0.6906E-02 | 0.2040E+04 | 0x00ffff |
| 0.6301E+02 | 0.5576E-02 | 0.2040E+04 | 0x00ffff |
| 0.6400E+02 | 0.4428E-02 | 0.2040E+04 | 0x00ffff |
| 0.6499E+02 | 0.3775E-02 | 0.2040E+04 | 0x00ffff |
| 0.6597E+02 | 0.3108E-02 | 0.2040E+04 | 0x00ffff |
| 0.6696E+02 | 0.2431E-02 | 0.2040E+04 | 0x00ffff |
| 0.6795E+02 | 0.1890E-02 | 0.2040E+04 | 0x00ffff |
| 0.6894E+02 | 0.1507E-02 | 0.2040E+04 | 0x00ffff |
| 0.6993E+02 | 0.1300E-02 | 0.2040E+04 | 0x00ffff |
| 0.7092E+02 | 0.1074E-02 | 0.2040E+04 | 0x00ffff |
| 0.7191E+02 | 0.8073E-03 | 0.2040E+04 | 0x00ffff |
| 0.7290E+02 | 0.6160E-03 | 0.2040E+04 | 0x00ffff |
| 0.7389E+02 | 0.5094E-03 | 0.2040E+04 | 0x00ffff |
| 0.7487E+02 | 0.4093E-03 | 0.2040E+04 | 0x00ffff |
| 0.7586E+02 | 0.2918E-03 | 0.2040E+04 | 0x00ffff |
| 0.7685E+02 | 0.2279E-03 | 0.2040E+04 | 0x00ffff |
| 0.7784E+02 | 0.1942E-03 | 0.2040E+04 | 0x00ffff |
| 0.7883E+02 | 0.1528E-03 | 0.2040E+04 | 0x00ffff |
| 0.7982E+02 | 0.1061E-03 | 0.2040E+04 | 0x00ffff |
| 0.8081E+02 | 0.8741E-04 | 0.2040E+04 | 0x00ffff |
| 0.8180E+02 | 0.8671E-04 | 0.2040E+04 | 0x00ffff |
| 0.8279E+02 | 0.7469E-04 | 0.2040E+04 | 0x00ffff |
| 0.8377E+02 | 0.5191E-04 | 0.2040E+04 | 0x00ffff |
| 0.8476E+02 | 0.4030E-04 | 0.2040E+04 | 0x00ffff |
| 0.8575E+02 | 0.4541E-04 | 0.2040E+04 | 0x00ffff |

V1\_Results\_baseline\_T\_3D\_2040.dat

|            |            |            |          |
|------------|------------|------------|----------|
| 0.8674E+02 | 0.3960E-04 | 0.2040E+04 | 0x00ffff |
| 0.8773E+02 | 0.2746E-04 | 0.2040E+04 | 0x00ffff |
| 0.8872E+02 | 0.3121E-04 | 0.2040E+04 | 0x00ffff |
| 0.8971E+02 | 0.2746E-04 | 0.2040E+04 | 0x00ffff |
| 0.9070E+02 | 0.2238E-04 | 0.2040E+04 | 0x00ffff |
| 0.9169E+02 | 0.1626E-04 | 0.2040E+04 | 0x00ffff |
| 0.9268E+02 | 0.7868E-05 | 0.2040E+04 | 0x00ffff |
| 0.9366E+02 | 0.8113E-05 | 0.2040E+04 | 0x00ffff |
| 0.9465E+02 | 0.7188E-05 | 0.2040E+04 | 0x00ffff |
| 0.9564E+02 | 0.5624E-05 | 0.2040E+04 | 0x00ffff |
| 0.9663E+02 | 0.4352E-05 | 0.2040E+04 | 0x00ffff |
| 0.9762E+02 | 0.1936E-05 | 0.2040E+04 | 0x00ffff |
