# Supplementary material
Source: MDPI journal article supplement (https://www.mdpi.com/1996-1073/12/15/2875)
Supplement: s1 [file s1]

# V1\_Results\_baseline\_T\_3D\_2030.dat

# \*\*\* CASO: 1, IEA ; 2, Irena : 1

#n° de simulaciones = 100000

# \*\*\*\*\* Parámetros Wind \*\*\*\*\*

#medias ec. precio Turbinas : 2.9666 -0.1860  
 #dev. est. parámetros ec. precio Turbinas : 0.0000 0.0130  
 #dev. est. ec. precio Turbinas : 0.0900  
 #valor inicial en 2014 de Cap 340.6110  
 #depreciación, Performance Ratio, kgCO2 0.984 1.000 0.780  
 #Life Span de los Turbinas 27  
 #Social Discount Rate 0.022500 0.019286  
 #WACC, Loan Maturity 0.050 15  
 #Generación aleatoria de los parámetros = T  
 #Generación aleatoria de los errs. de las ecs. = T  
 #Storage costs tenido en cuenta = T  
 #Modelo Precio Turbinas (1, old; 2, simple; 3, LR dec.; 4, LR +dec. 2

# \*\*\*\*\* Parámetros PV \*\*\*\*\*

#medias ec. precio módulos : 3.6025 -0.3200  
 #dev. est. parámetros ec. precio módulos : 0.1710 0.0240  
 #dev. est. ec. precio módulos : 0.3300  
 #valores iniciales en 2014 de Cap, Pe, Pm, Ps, upm : 157.7609 0.8229 0.7050  
 0.0760 0.0000  
 #depreciación, Performance Ratio, kgCO2 : 0.990 0.850 0.780  
 #Life Span de los módulos : 30  
 #Social Discount Rate : 0.022500 0.019286  
 #WACC, Loan Maturity : 0.090 7  
 #Generación aleatoria de los parámetros = T  
 #Generación aleatoria de los errs. de las ecs. = T  
 #Storage costs tenido en cuenta = T  
 #Modelo Precio módulos (1, old; 2, simple; 3, LR dec.; 4, LR +dec. : 2

# V1\_Results\_baseline\_T\_3D\_2030.dat

```

#*****
#***  p.d.f. LCE (US$/MWh): TOTAL 2020, 2030, 2040 ,2050 (Smoothed, Not standardised) ***
#*****
#          2020          2030          2040          2050
#  *****      NOT standardised      *****
#  *****      adaptados para un plot en 3D con gnuplot      *****

```

```

#          2030

```

|            |            |            |           |
|------------|------------|------------|-----------|
| 0.2924E+02 | 0.6345E-05 | 0.2030E+04 | 0xfffff00 |
| 0.3056E+02 | 0.1394E-04 | 0.2030E+04 | 0xfffff00 |
| 0.3188E+02 | 0.5370E-04 | 0.2030E+04 | 0xfffff00 |
| 0.3320E+02 | 0.2070E-03 | 0.2030E+04 | 0xfffff00 |
| 0.3453E+02 | 0.5542E-03 | 0.2030E+04 | 0xfffff00 |
| 0.3585E+02 | 0.1337E-02 | 0.2030E+04 | 0xfffff00 |
| 0.3717E+02 | 0.2852E-02 | 0.2030E+04 | 0xfffff00 |
| 0.3850E+02 | 0.5302E-02 | 0.2030E+04 | 0xfffff00 |
| 0.3982E+02 | 0.9148E-02 | 0.2030E+04 | 0xfffff00 |
| 0.4114E+02 | 0.1444E-01 | 0.2030E+04 | 0xfffff00 |
| 0.4246E+02 | 0.2038E-01 | 0.2030E+04 | 0xfffff00 |
| 0.4379E+02 | 0.2710E-01 | 0.2030E+04 | 0xfffff00 |
| 0.4511E+02 | 0.3445E-01 | 0.2030E+04 | 0xfffff00 |
| 0.4643E+02 | 0.4108E-01 | 0.2030E+04 | 0xfffff00 |
| 0.4776E+02 | 0.4641E-01 | 0.2030E+04 | 0xfffff00 |
| 0.4908E+02 | 0.5069E-01 | 0.2030E+04 | 0xfffff00 |
| 0.5040E+02 | 0.5327E-01 | 0.2030E+04 | 0xfffff00 |
| 0.5172E+02 | 0.5360E-01 | 0.2030E+04 | 0xfffff00 |
| 0.5305E+02 | 0.5162E-01 | 0.2030E+04 | 0xfffff00 |
| 0.5437E+02 | 0.4885E-01 | 0.2030E+04 | 0xfffff00 |
| 0.5569E+02 | 0.4556E-01 | 0.2030E+04 | 0xfffff00 |
| 0.5702E+02 | 0.4069E-01 | 0.2030E+04 | 0xfffff00 |
| 0.5834E+02 | 0.3581E-01 | 0.2030E+04 | 0xfffff00 |
| 0.5966E+02 | 0.3159E-01 | 0.2030E+04 | 0xfffff00 |
| 0.6098E+02 | 0.2759E-01 | 0.2030E+04 | 0xfffff00 |

V1\_Results\_baseline\_T\_3D\_2030.dat

|            |            |            |           |
|------------|------------|------------|-----------|
| 0.6231E+02 | 0.2309E-01 | 0.2030E+04 | 0xfffff00 |
| 0.6363E+02 | 0.1856E-01 | 0.2030E+04 | 0xfffff00 |
| 0.6495E+02 | 0.1507E-01 | 0.2030E+04 | 0xfffff00 |
| 0.6628E+02 | 0.1239E-01 | 0.2030E+04 | 0xfffff00 |
| 0.6760E+02 | 0.9956E-02 | 0.2030E+04 | 0xfffff00 |
| 0.6892E+02 | 0.7864E-02 | 0.2030E+04 | 0xfffff00 |
| 0.7024E+02 | 0.6045E-02 | 0.2030E+04 | 0xfffff00 |
| 0.7157E+02 | 0.4695E-02 | 0.2030E+04 | 0xfffff00 |
| 0.7289E+02 | 0.3716E-02 | 0.2030E+04 | 0xfffff00 |
| 0.7421E+02 | 0.2769E-02 | 0.2030E+04 | 0xfffff00 |
| 0.7554E+02 | 0.2120E-02 | 0.2030E+04 | 0xfffff00 |
| 0.7686E+02 | 0.1789E-02 | 0.2030E+04 | 0xfffff00 |
| 0.7818E+02 | 0.1320E-02 | 0.2030E+04 | 0xfffff00 |
| 0.7951E+02 | 0.8997E-03 | 0.2030E+04 | 0xfffff00 |
| 0.8083E+02 | 0.7001E-03 | 0.2030E+04 | 0xfffff00 |
| 0.8215E+02 | 0.5551E-03 | 0.2030E+04 | 0xfffff00 |
| 0.8347E+02 | 0.4498E-03 | 0.2030E+04 | 0xfffff00 |
| 0.8480E+02 | 0.3176E-03 | 0.2030E+04 | 0xfffff00 |
| 0.8612E+02 | 0.2389E-03 | 0.2030E+04 | 0xfffff00 |
| 0.8744E+02 | 0.2062E-03 | 0.2030E+04 | 0xfffff00 |
| 0.8877E+02 | 0.1675E-03 | 0.2030E+04 | 0xfffff00 |
| 0.9009E+02 | 0.1179E-03 | 0.2030E+04 | 0xfffff00 |
| 0.9141E+02 | 0.6334E-04 | 0.2030E+04 | 0xfffff00 |
| 0.9273E+02 | 0.4650E-04 | 0.2030E+04 | 0xfffff00 |
| 0.9406E+02 | 0.3120E-04 | 0.2030E+04 | 0xfffff00 |
| 0.9538E+02 | 0.2884E-04 | 0.2030E+04 | 0xfffff00 |
| 0.9670E+02 | 0.2381E-04 | 0.2030E+04 | 0xfffff00 |
| 0.9803E+02 | 0.1614E-04 | 0.2030E+04 | 0xfffff00 |
| 0.9935E+02 | 0.9988E-05 | 0.2030E+04 | 0xfffff00 |
| 0.1007E+03 | 0.1216E-04 | 0.2030E+04 | 0xfffff00 |
| 0.1020E+03 | 0.1504E-04 | 0.2030E+04 | 0xfffff00 |
| 0.1033E+03 | 0.6079E-05 | 0.2030E+04 | 0xfffff00 |
| 0.1046E+03 | 0.5488E-05 | 0.2030E+04 | 0xfffff00 |
| 0.1060E+03 | 0.6813E-05 | 0.2030E+04 | 0xfffff00 |
