# Supplementary material
Source: MDPI journal article supplement (https://www.mdpi.com/1996-1073/12/15/2875)
Supplement: s1 [file s1]

# V2\_Results\_baseline\_IEA\_accel.dat

# \*\*\* CASO: 1, IEA ; 2, Irena : 1

# \*\*\* Roadmap (1,acelerado; 2,retrasado) : 1

#n° de simulaciones = 100000

# \*\*\*\*\* Parámetros Wind \*\*\*\*\*

#medias ec. precio Turbinas : 2.9666 -0.1860  
 #dev. est. parámetros ec. precio Turbinas : 0.0000 0.0130  
 #dev. est. ec. precio Turbinas : 0.0900  
 #valor inicial en 2014 de Cap 340.6110  
 #depreciación, Performance Ratio, kgCO2 0.984 1.000 0.780  
 #Life Span de los Turbinas 27  
 #Social Discount Rate 0.022500 0.019286  
 #WACC, Loan Maturity 0.050 15  
 #Generación aleatoria de los parámetros = T  
 #Generación aleatoria de los errs. de las ecs. = T  
 #Storage costs tenido en cuenta = T  
 #Modelo Precio Turbinas (1, old; 2, simple; 3, LR dec.; 4, LR +dec. 2

# \*\*\*\*\* Parámetros PV \*\*\*\*\*

#medias ec. precio módulos : 3.6025 -0.3200  
 #dev. est. parámetros ec. precio módulos : 0.1710 0.0240  
 #dev. est. ec. precio módulos : 0.3300  
 #valores iniciales en 2014 de Cap, Pe, Pm, Ps, upm : 157.7609 0.8229 0.7050  
 0.0760 0.0000  
 #depreciación, Performance Ratio, kgCO2 : 0.990 0.850 0.780  
 #Life Span de los módulos : 30  
 #Social Discount Rate : 0.022500 0.019286  
 #WACC, Loan Maturity : 0.090 7  
 #Generación aleatoria de los parámetros = T  
 #Generación aleatoria de los errs. de las ecs. = T  
 #Storage costs tenido en cuenta = T

#Modelo Precio módulos (1, old; 2, simple; 3, LR dec.; 4, LR +dec. : 2

\*\*\*\*\*  
 \*\*\*\*\* ENERGY GENERATED \*\*\*\*\*  
 \*\*\*\*\*

Total, PV, Wind: 0.29275E+12 0.13226E+12 0.16049E+12  
 PV(%), Wind(%): 0.451778 0.548222

#\*\*\*\*\*  
 #\*\*\*\*\* ANNUAL LCE (means; US \$ per Mwh.) \*\*\*\*\*  
 #\*\*\*\*\*  
 #

|      | Total       | PV          | Wind        |
|------|-------------|-------------|-------------|
| 2015 | 0.83565E+02 | 0.83928E+02 | 0.83304E+02 |
| 2016 | 0.75395E+02 | 0.73141E+02 | 0.77487E+02 |
| 2017 | 0.70455E+02 | 0.67281E+02 | 0.73418E+02 |
| 2018 | 0.66827E+02 | 0.63117E+02 | 0.70306E+02 |
| 2019 | 0.63941E+02 | 0.59873E+02 | 0.67771E+02 |
| 2020 | 0.61515E+02 | 0.57176E+02 | 0.65614E+02 |
| 2021 | 0.59495E+02 | 0.54863E+02 | 0.63888E+02 |
| 2022 | 0.57597E+02 | 0.52761E+02 | 0.62182E+02 |
| 2023 | 0.55985E+02 | 0.50943E+02 | 0.60780E+02 |
| 2024 | 0.54519E+02 | 0.49315E+02 | 0.59477E+02 |
| 2025 | 0.53174E+02 | 0.47771E+02 | 0.58304E+02 |
| 2026 | 0.52000E+02 | 0.46421E+02 | 0.57290E+02 |
| 2027 | 0.50892E+02 | 0.45141E+02 | 0.56354E+02 |
| 2028 | 0.49935E+02 | 0.44005E+02 | 0.55472E+02 |
| 2029 | 0.49104E+02 | 0.42963E+02 | 0.54854E+02 |
| 2030 | 0.48229E+02 | 0.42095E+02 | 0.53950E+02 |
| 2031 | 0.73217E+02 | 0.34478E+03 | 0.64801E+02 |
| 2032 | 0.71288E+02 | 0.26471E+03 | 0.64067E+02 |
| 2033 | 0.63196E+02 | 0.24337E+03 | 0.56655E+02 |
| 2034 | 0.62449E+02 | 0.16717E+03 | 0.57743E+02 |

# V2\_Results\_baseline\_IEA\_accel.dat

|      |             |             |             |
|------|-------------|-------------|-------------|
| 2035 | 0.67399E+02 | 0.23924E+03 | 0.59291E+02 |
| 2036 | 0.83709E+02 | 0.48345E+03 | 0.65439E+02 |
| 2037 | 0.85234E+02 | 0.30983E+03 | 0.66905E+02 |
| 2038 | 0.74577E+02 | 0.18298E+03 | 0.62429E+02 |
| 2039 | 0.68653E+02 | 0.13265E+03 | 0.59892E+02 |
| 2040 | 0.67643E+02 | 0.76251E+02 | 0.63894E+02 |
| 2041 | 0.59737E+02 | 0.63189E+02 | 0.58411E+02 |
| 2042 | 0.55432E+02 | 0.58765E+02 | 0.54541E+02 |
| 2043 | 0.51030E+02 | 0.51933E+02 | 0.50909E+02 |
| 2044 | 0.50628E+02 | 0.50182E+02 | 0.50690E+02 |
| 2045 | 0.49413E+02 | 0.40294E+02 | 0.52150E+02 |
| 2046 | 0.43246E+02 | 0.34104E+02 | 0.52101E+02 |
| 2047 | 0.43042E+02 | 0.33732E+02 | 0.52054E+02 |
| 2048 | 0.42871E+02 | 0.33400E+02 | 0.52037E+02 |
| 2049 | 0.42739E+02 | 0.33084E+02 | 0.52045E+02 |
| 2050 | 0.42523E+02 | 0.32811E+02 | 0.51883E+02 |

\*\*\*\*\*  
 #\*\*\*\*\* TOTAL, PV & WIND, LCE (US\$/MWh): SUMMARY STATISTICS \*\*\*\*\*  
 #\*\*\*\*\*

\*\*\*\*\* Wind \*\*\*\*\*

MEAN, VARIANCE, SKW, KURT & MAX. VALUES 50%, 80%, 90%, 95%

0.607E+02 0.113E+03 0.585E+00 0.365E+01 0.596E+02 0.690E+02 0.746E+02 0.795E+02

LCE EXPECT. / ( LCE > LCE max. at 80%, 90%, 95%)

0.7664E+02 0.8129E+02 0.8545E+02

\*\*\*\*\* PV \*\*\*\*\*

# V2\_Results\_baseline\_IEA\_accel.dat

MEAN, VARIANCE, SKW, KURT & MAX. VALUES 50%, 80%, 90%, 95%

0.516E+02 0.635E+02 0.125E+01 0.582E+01 0.501E+02 0.572E+02 0.620E+02 0.665E+02

LCE EXPECT. / ( LCE > LCE max. al 80%, 90%, 95%)

0.6353E+02 0.6796E+02 0.7280E+02

\*\*\*\*\* Total \*\*\*\*\*

MEAN, VARIANCE, SKW, KURT & MAX. VALUES 50%, 80%, 90%, 95%

0.566E+02 0.469E+02 0.533E+00 0.356E+01 0.559E+02 0.619E+02 0.655E+02 0.686E+02

LCE EXPECT. / ( LCE > LCE max. al 80%, 90%, 95%)

0.6748E+02 0.6998E+02 0.7287E+02

#\*\*\*\*\*  
#\*\*\*\*\* TOTAL LCE (US\$/MWh): SUMMARY STATISTICS; ALL YEARS: 2015 - 2050 \*\*\*\*\*  
#\*\*\*\*\*

# MEAN, VARIANCE, SKW, KURT, INT: 2.5%, 50%, 80%, 90%, 95%, 97.5%

|   |           |           |           |           |           |           |           |           |
|---|-----------|-----------|-----------|-----------|-----------|-----------|-----------|-----------|
| 1 | 0.836E+02 | 0.142E+03 | 0.748E+00 | 0.430E+01 | 0.638E+02 | 0.823E+02 | 0.928E+02 | 0.991E+02 |
|   | 0.105E+03 | 0.110E+03 |           |           |           |           |           |           |
| 2 | 0.754E+02 | 0.113E+03 | 0.818E+00 | 0.457E+01 | 0.582E+02 | 0.742E+02 | 0.834E+02 | 0.892E+02 |
|   | 0.944E+02 | 0.994E+02 |           |           |           |           |           |           |
| 3 | 0.705E+02 | 0.965E+02 | 0.797E+00 | 0.449E+01 | 0.544E+02 | 0.692E+02 | 0.779E+02 | 0.830E+02 |
|   | 0.880E+02 | 0.927E+02 |           |           |           |           |           |           |
| 4 | 0.668E+02 | 0.854E+02 | 0.766E+00 | 0.436E+01 | 0.517E+02 | 0.658E+02 | 0.739E+02 | 0.787E+02 |

V2\_Results\_baseline\_IEA\_accel.dat

|           |           |           |           |           |           |           |           |           |  |
|-----------|-----------|-----------|-----------|-----------|-----------|-----------|-----------|-----------|--|
| 0.832E+02 | 0.875E+02 |           |           |           |           |           |           |           |  |
| 5         | 0.639E+02 | 0.779E+02 | 0.785E+00 | 0.452E+01 | 0.495E+02 | 0.630E+02 | 0.706E+02 | 0.752E+02 |  |
| 0.795E+02 | 0.837E+02 |           |           |           |           |           |           |           |  |
| 6         | 0.615E+02 | 0.724E+02 | 0.752E+00 | 0.429E+01 | 0.474E+02 | 0.605E+02 | 0.679E+02 | 0.726E+02 |  |
| 0.766E+02 | 0.806E+02 |           |           |           |           |           |           |           |  |
| 7         | 0.595E+02 | 0.684E+02 | 0.770E+00 | 0.438E+01 | 0.458E+02 | 0.586E+02 | 0.656E+02 | 0.703E+02 |  |
| 0.743E+02 | 0.782E+02 |           |           |           |           |           |           |           |  |
| 8         | 0.576E+02 | 0.637E+02 | 0.756E+00 | 0.426E+01 | 0.445E+02 | 0.567E+02 | 0.636E+02 | 0.679E+02 |  |
| 0.718E+02 | 0.756E+02 |           |           |           |           |           |           |           |  |
| 9         | 0.560E+02 | 0.612E+02 | 0.762E+00 | 0.437E+01 | 0.431E+02 | 0.551E+02 | 0.620E+02 | 0.661E+02 |  |
| 0.699E+02 | 0.736E+02 |           |           |           |           |           |           |           |  |
| 10        | 0.545E+02 | 0.584E+02 | 0.767E+00 | 0.438E+01 | 0.420E+02 | 0.537E+02 | 0.602E+02 | 0.643E+02 |  |
| 0.682E+02 | 0.719E+02 |           |           |           |           |           |           |           |  |
| 11        | 0.532E+02 | 0.557E+02 | 0.721E+00 | 0.415E+01 | 0.408E+02 | 0.523E+02 | 0.589E+02 | 0.628E+02 |  |
| 0.664E+02 | 0.699E+02 |           |           |           |           |           |           |           |  |
| 12        | 0.520E+02 | 0.542E+02 | 0.735E+00 | 0.415E+01 | 0.399E+02 | 0.512E+02 | 0.577E+02 | 0.615E+02 |  |
| 0.651E+02 | 0.685E+02 |           |           |           |           |           |           |           |  |
| 13        | 0.509E+02 | 0.521E+02 | 0.719E+00 | 0.408E+01 | 0.390E+02 | 0.501E+02 | 0.564E+02 | 0.602E+02 |  |
| 0.637E+02 | 0.671E+02 |           |           |           |           |           |           |           |  |
| 14        | 0.499E+02 | 0.507E+02 | 0.710E+00 | 0.406E+01 | 0.381E+02 | 0.491E+02 | 0.555E+02 | 0.592E+02 |  |
| 0.627E+02 | 0.659E+02 |           |           |           |           |           |           |           |  |
| 15        | 0.491E+02 | 0.496E+02 | 0.728E+00 | 0.412E+01 | 0.375E+02 | 0.482E+02 | 0.544E+02 | 0.582E+02 |  |
| 0.617E+02 | 0.649E+02 |           |           |           |           |           |           |           |  |
| 16        | 0.482E+02 | 0.475E+02 | 0.696E+00 | 0.403E+01 | 0.368E+02 | 0.474E+02 | 0.535E+02 | 0.571E+02 |  |
| 0.604E+02 | 0.636E+02 |           |           |           |           |           |           |           |  |
| 17        | 0.732E+02 | 0.111E+03 | 0.661E+00 | 0.380E+01 | 0.558E+02 | 0.720E+02 | 0.813E+02 | 0.871E+02 |  |
| 0.921E+02 | 0.966E+02 |           |           |           |           |           |           |           |  |
| 18        | 0.713E+02 | 0.110E+03 | 0.659E+00 | 0.375E+01 | 0.540E+02 | 0.700E+02 | 0.795E+02 | 0.851E+02 |  |
| 0.901E+02 | 0.947E+02 |           |           |           |           |           |           |           |  |
| 19        | 0.632E+02 | 0.109E+03 | 0.653E+00 | 0.381E+01 | 0.458E+02 | 0.621E+02 | 0.712E+02 | 0.769E+02 |  |
| 0.819E+02 | 0.866E+02 |           |           |           |           |           |           |           |  |
| 20        | 0.624E+02 | 0.107E+03 | 0.652E+00 | 0.375E+01 | 0.451E+02 | 0.613E+02 | 0.704E+02 | 0.761E+02 |  |
| 0.811E+02 | 0.856E+02 |           |           |           |           |           |           |           |  |
| 21        | 0.674E+02 | 0.106E+03 | 0.661E+00 | 0.383E+01 | 0.502E+02 | 0.662E+02 | 0.754E+02 | 0.808E+02 |  |
| 0.859E+02 | 0.905E+02 |           |           |           |           |           |           |           |  |
| 22        | 0.837E+02 | 0.106E+03 | 0.649E+00 | 0.375E+01 | 0.667E+02 | 0.825E+02 | 0.917E+02 | 0.972E+02 |  |

# V2\_Results\_baseline\_IEA\_accel.dat

|           |           |           |           |           |           |           |           |           |  |
|-----------|-----------|-----------|-----------|-----------|-----------|-----------|-----------|-----------|--|
| 0.102E+03 | 0.107E+03 |           |           |           |           |           |           |           |  |
| 23        | 0.852E+02 | 0.993E+02 | 0.668E+00 | 0.389E+01 | 0.686E+02 | 0.841E+02 | 0.929E+02 | 0.982E+02 |  |
| 0.103E+03 | 0.107E+03 |           |           |           |           |           |           |           |  |
| 24        | 0.746E+02 | 0.942E+02 | 0.642E+00 | 0.376E+01 | 0.584E+02 | 0.735E+02 | 0.822E+02 | 0.872E+02 |  |
| 0.919E+02 | 0.961E+02 |           |           |           |           |           |           |           |  |
| 25        | 0.687E+02 | 0.900E+02 | 0.673E+00 | 0.393E+01 | 0.528E+02 | 0.676E+02 | 0.760E+02 | 0.809E+02 |  |
| 0.856E+02 | 0.899E+02 |           |           |           |           |           |           |           |  |
| 26        | 0.676E+02 | 0.617E+02 | 0.620E+00 | 0.371E+01 | 0.544E+02 | 0.668E+02 | 0.738E+02 | 0.779E+02 |  |
| 0.817E+02 | 0.851E+02 |           |           |           |           |           |           |           |  |
| 27        | 0.597E+02 | 0.645E+02 | 0.621E+00 | 0.373E+01 | 0.463E+02 | 0.588E+02 | 0.659E+02 | 0.703E+02 |  |
| 0.741E+02 | 0.777E+02 |           |           |           |           |           |           |           |  |
| 28        | 0.554E+02 | 0.737E+02 | 0.630E+00 | 0.371E+01 | 0.411E+02 | 0.545E+02 | 0.622E+02 | 0.666E+02 |  |
| 0.707E+02 | 0.744E+02 |           |           |           |           |           |           |           |  |
| 29        | 0.510E+02 | 0.889E+02 | 0.678E+00 | 0.391E+01 | 0.353E+02 | 0.498E+02 | 0.584E+02 | 0.634E+02 |  |
| 0.679E+02 | 0.721E+02 |           |           |           |           |           |           |           |  |
| 30        | 0.506E+02 | 0.875E+02 | 0.667E+00 | 0.383E+01 | 0.351E+02 | 0.496E+02 | 0.580E+02 | 0.628E+02 |  |
| 0.673E+02 | 0.715E+02 |           |           |           |           |           |           |           |  |
| 31        | 0.494E+02 | 0.740E+02 | 0.633E+00 | 0.376E+01 | 0.350E+02 | 0.485E+02 | 0.560E+02 | 0.607E+02 |  |
| 0.647E+02 | 0.686E+02 |           |           |           |           |           |           |           |  |
| 32        | 0.432E+02 | 0.475E+02 | 0.740E+00 | 0.438E+01 | 0.317E+02 | 0.424E+02 | 0.486E+02 | 0.521E+02 |  |
| 0.555E+02 | 0.587E+02 |           |           |           |           |           |           |           |  |
| 33        | 0.430E+02 | 0.475E+02 | 0.729E+00 | 0.417E+01 | 0.316E+02 | 0.423E+02 | 0.482E+02 | 0.520E+02 |  |
| 0.553E+02 | 0.584E+02 |           |           |           |           |           |           |           |  |
| 34        | 0.429E+02 | 0.477E+02 | 0.733E+00 | 0.420E+01 | 0.314E+02 | 0.421E+02 | 0.481E+02 | 0.519E+02 |  |
| 0.552E+02 | 0.582E+02 |           |           |           |           |           |           |           |  |
| 35        | 0.427E+02 | 0.479E+02 | 0.734E+00 | 0.421E+01 | 0.313E+02 | 0.418E+02 | 0.480E+02 | 0.517E+02 |  |
| 0.550E+02 | 0.583E+02 |           |           |           |           |           |           |           |  |
| 36        | 0.425E+02 | 0.476E+02 | 0.727E+00 | 0.418E+01 | 0.311E+02 | 0.418E+02 | 0.478E+02 | 0.515E+02 |  |
| 0.547E+02 | 0.580E+02 |           |           |           |           |           |           |           |  |

```

#*****
# p.d.f. & C.d.f LCE (US$/MWh): TOTAL, PV, WIND (Smoothed, NOT standardised)
#*****
#
#           Total           PV           Wind

```

# V2\_Results\_baseline\_IEA\_accel.dat

|            |            |                  |            |            |            |            |            |
|------------|------------|------------------|------------|------------|------------|------------|------------|
| #          | *****      | NOT standardised | *****      |            |            |            |            |
| -200       | 0.3349E+02 | 0.4606E-05       | 0.7819E-06 | 0.1503E+00 | 0.7895E-05 | 0.2373E-05 | 0.2831E+02 |
| 0.6505E-05 | 0.1670E-05 |                  |            |            |            |            |            |
| -195       | 0.3434E+02 | 0.8576E-05       | 0.6249E-05 | 0.1653E+01 | 0.1852E-05 | 0.1000E-04 | 0.2959E+02 |
| 0.1719E-04 | 0.1747E-04 |                  |            |            |            |            |            |
| -190       | 0.3519E+02 | 0.2732E-04       | 0.2234E-04 | 0.3156E+01 | 0.0000E+00 | 0.1000E-04 | 0.3088E+02 |
| 0.4792E-04 | 0.5950E-04 |                  |            |            |            |            |            |
| -185       | 0.3604E+02 | 0.4587E-04       | 0.5566E-04 | 0.4659E+01 | 0.0000E+00 | 0.1000E-04 | 0.3216E+02 |
| 0.1209E-03 | 0.1713E-03 |                  |            |            |            |            |            |
| -180       | 0.3689E+02 | 0.7677E-04       | 0.1075E-03 | 0.6162E+01 | 0.0000E+00 | 0.1000E-04 | 0.3344E+02 |
| 0.2774E-03 | 0.4383E-03 |                  |            |            |            |            |            |
| -175       | 0.3774E+02 | 0.1631E-03       | 0.2113E-03 | 0.7665E+01 | 0.0000E+00 | 0.1000E-04 | 0.3473E+02 |
| 0.5305E-03 | 0.9763E-03 |                  |            |            |            |            |            |
| -170       | 0.3859E+02 | 0.3695E-03       | 0.4464E-03 | 0.9168E+01 | 0.0000E+00 | 0.1000E-04 | 0.3601E+02 |
| 0.8934E-03 | 0.1919E-02 |                  |            |            |            |            |            |
| -165       | 0.3944E+02 | 0.6693E-03       | 0.9027E-03 | 0.1067E+02 | 0.0000E+00 | 0.1000E-04 | 0.3729E+02 |
| 0.1519E-02 | 0.3521E-02 |                  |            |            |            |            |            |
| -160       | 0.4028E+02 | 0.1213E-02       | 0.1730E-02 | 0.1217E+02 | 0.0000E+00 | 0.1000E-04 | 0.3858E+02 |
| 0.2456E-02 | 0.6148E-02 |                  |            |            |            |            |            |
| -155       | 0.4113E+02 | 0.2027E-02       | 0.3145E-02 | 0.1368E+02 | 0.0000E+00 | 0.1000E-04 | 0.3986E+02 |
| 0.3804E-02 | 0.1031E-01 |                  |            |            |            |            |            |
| -150       | 0.4198E+02 | 0.3375E-02       | 0.5515E-02 | 0.1518E+02 | 0.0000E+00 | 0.1000E-04 | 0.4114E+02 |
| 0.5470E-02 | 0.1643E-01 |                  |            |            |            |            |            |
| -145       | 0.4283E+02 | 0.5237E-02       | 0.9288E-02 | 0.1668E+02 | 0.0000E+00 | 0.1000E-04 | 0.4243E+02 |
| 0.7604E-02 | 0.2505E-01 |                  |            |            |            |            |            |
| -140       | 0.4368E+02 | 0.7892E-02       | 0.1503E-01 | 0.1819E+02 | 0.0000E+00 | 0.1000E-04 | 0.4371E+02 |
| 0.1018E-01 | 0.3673E-01 |                  |            |            |            |            |            |
| -135       | 0.4453E+02 | 0.1116E-01       | 0.2335E-01 | 0.1969E+02 | 0.0000E+00 | 0.1000E-04 | 0.4499E+02 |
| 0.1325E-01 | 0.5211E-01 |                  |            |            |            |            |            |
| -130       | 0.4538E+02 | 0.1500E-01       | 0.3474E-01 | 0.2119E+02 | 0.0000E+00 | 0.1000E-04 | 0.4628E+02 |
| 0.1683E-01 | 0.7180E-01 |                  |            |            |            |            |            |
| -125       | 0.4623E+02 | 0.1960E-01       | 0.4975E-01 | 0.2269E+02 | 0.0000E+00 | 0.1000E-04 | 0.4756E+02 |
| 0.2079E-01 | 0.9645E-01 |                  |            |            |            |            |            |
| -120       | 0.4708E+02 | 0.2481E-01       | 0.6901E-01 | 0.2420E+02 | 0.0000E+00 | 0.1000E-04 | 0.4885E+02 |
| 0.2478E-01 | 0.1262E+00 |                  |            |            |            |            |            |

|      |                       | V2_Results_baseline_IEA_accel.dat |            |            |            |            |  |
|------|-----------------------|-----------------------------------|------------|------------|------------|------------|--|
| -115 | 0.4792E+02 0.3050E-01 | 0.9294E-01                        | 0.2570E+02 | 0.0000E+00 | 0.1000E-04 | 0.5013E+02 |  |
|      | 0.2832E-01 0.1608E+00 |                                   |            |            |            |            |  |
| -110 | 0.4877E+02 0.3618E-01 | 0.1217E+00                        | 0.2720E+02 | 0.0000E+00 | 0.1000E-04 | 0.5141E+02 |  |
|      | 0.3125E-01 0.1994E+00 |                                   |            |            |            |            |  |
| -105 | 0.4962E+02 0.4183E-01 | 0.1554E+00                        | 0.2871E+02 | 0.0000E+00 | 0.1000E-04 | 0.5270E+02 |  |
|      | 0.3377E-01 0.2416E+00 |                                   |            |            |            |            |  |
| -100 | 0.5047E+02 0.4685E-01 | 0.1935E+00                        | 0.3021E+02 | 0.0000E+00 | 0.1000E-04 | 0.5398E+02 |  |
|      | 0.3578E-01 0.2865E+00 |                                   |            |            |            |            |  |
| -95  | 0.5132E+02 0.5131E-01 | 0.2356E+00                        | 0.3171E+02 | 0.0000E+00 | 0.1000E-04 | 0.5526E+02 |  |
|      | 0.3721E-01 0.3336E+00 |                                   |            |            |            |            |  |
| -90  | 0.5217E+02 0.5475E-01 | 0.2809E+00                        | 0.3321E+02 | 0.0000E+00 | 0.1000E-04 | 0.5655E+02 |  |
|      | 0.3841E-01 0.3823E+00 |                                   |            |            |            |            |  |
| -85  | 0.5302E+02 0.5730E-01 | 0.3288E+00                        | 0.3472E+02 | 0.6076E-04 | 0.4162E-04 | 0.5783E+02 |  |
|      | 0.3904E-01 0.4322E+00 |                                   |            |            |            |            |  |
| -80  | 0.5387E+02 0.5880E-01 | 0.3782E+00                        | 0.3622E+02 | 0.6002E-03 | 0.5101E-03 | 0.5911E+02 |  |
|      | 0.3893E-01 0.4823E+00 |                                   |            |            |            |            |  |
| -75  | 0.5471E+02 0.5944E-01 | 0.4285E+00                        | 0.3772E+02 | 0.3276E-02 | 0.3425E-02 | 0.6040E+02 |  |
|      | 0.3792E-01 0.5315E+00 |                                   |            |            |            |            |  |
| -70  | 0.5556E+02 0.5947E-01 | 0.4791E+00                        | 0.3923E+02 | 0.1003E-01 | 0.1387E-01 | 0.6168E+02 |  |
|      | 0.3632E-01 0.5790E+00 |                                   |            |            |            |            |  |
| -65  | 0.5641E+02 0.5845E-01 | 0.5291E+00                        | 0.4073E+02 | 0.2087E-01 | 0.3826E-01 | 0.6296E+02 |  |
|      | 0.3440E-01 0.6242E+00 |                                   |            |            |            |            |  |
| -60  | 0.5726E+02 0.5610E-01 | 0.5776E+00                        | 0.4223E+02 | 0.3411E-01 | 0.8154E-01 | 0.6425E+02 |  |
|      | 0.3229E-01 0.6667E+00 |                                   |            |            |            |            |  |
| -55  | 0.5811E+02 0.5315E-01 | 0.6237E+00                        | 0.4374E+02 | 0.4630E-01 | 0.1441E+00 | 0.6553E+02 |  |
|      | 0.2997E-01 0.7064E+00 |                                   |            |            |            |            |  |
| -50  | 0.5896E+02 0.5009E-01 | 0.6673E+00                        | 0.4524E+02 | 0.5502E-01 | 0.2220E+00 | 0.6681E+02 |  |
|      | 0.2750E-01 0.7430E+00 |                                   |            |            |            |            |  |
| -45  | 0.5981E+02 0.4699E-01 | 0.7083E+00                        | 0.4674E+02 | 0.5906E-01 | 0.3089E+00 | 0.6810E+02 |  |
|      | 0.2506E-01 0.7764E+00 |                                   |            |            |            |            |  |
| -40  | 0.6066E+02 0.4321E-01 | 0.7463E+00                        | 0.4824E+02 | 0.5900E-01 | 0.3981E+00 | 0.6938E+02 |  |
|      | 0.2280E-01 0.8068E+00 |                                   |            |            |            |            |  |
| -35  | 0.6151E+02 0.3947E-01 | 0.7810E+00                        | 0.4975E+02 | 0.5630E-01 | 0.4847E+00 | 0.7066E+02 |  |
|      | 0.2037E-01 0.8343E+00 |                                   |            |            |            |            |  |
| -30  | 0.6235E+02 0.3521E-01 | 0.8124E+00                        | 0.5125E+02 | 0.5191E-01 | 0.5655E+00 | 0.7195E+02 |  |
|      | 0.1799E-01 0.8586E+00 |                                   |            |            |            |            |  |



|            |            |            | V2_Results_baseline_IEA_accel.dat |            |            |            |            |  |  |
|------------|------------|------------|-----------------------------------|------------|------------|------------|------------|--|--|
| -25        | 0.6320E+02 | 0.3129E-01 | 0.8403E+00                        | 0.5275E+02 | 0.4588E-01 | 0.6381E+00 | 0.7323E+02 |  |  |
| 0.1573E-01 | 0.8799E+00 |            |                                   |            |            |            |            |  |  |
| -20        | 0.6405E+02 | 0.2740E-01 | 0.8648E+00                        | 0.5426E+02 | 0.4013E-01 | 0.7018E+00 | 0.7451E+02 |  |  |
| 0.1370E-01 | 0.8985E+00 |            |                                   |            |            |            |            |  |  |
| -15        | 0.6490E+02 | 0.2403E-01 | 0.8864E+00                        | 0.5576E+02 | 0.3446E-01 | 0.7571E+00 | 0.7580E+02 |  |  |
| 0.1189E-01 | 0.9146E+00 |            |                                   |            |            |            |            |  |  |
| -10        | 0.6575E+02 | 0.2068E-01 | 0.9050E+00                        | 0.5726E+02 | 0.2845E-01 | 0.8034E+00 | 0.7708E+02 |  |  |
| 0.1022E-01 | 0.9286E+00 |            |                                   |            |            |            |            |  |  |
| -5         | 0.6660E+02 | 0.1767E-01 | 0.9211E+00                        | 0.5876E+02 | 0.2342E-01 | 0.8415E+00 | 0.7836E+02 |  |  |
| 0.8753E-02 | 0.9406E+00 |            |                                   |            |            |            |            |  |  |
| 0          | 0.6745E+02 | 0.1482E-01 | 0.9346E+00                        | 0.6027E+02 | 0.1908E-01 | 0.8727E+00 | 0.7965E+02 |  |  |
| 0.7387E-02 | 0.9508E+00 |            |                                   |            |            |            |            |  |  |
| 5          | 0.6830E+02 | 0.1247E-01 | 0.9459E+00                        | 0.6177E+02 | 0.1557E-01 | 0.8981E+00 | 0.8093E+02 |  |  |
| 0.6170E-02 | 0.9593E+00 |            |                                   |            |            |            |            |  |  |
| 10         | 0.6914E+02 | 0.1049E-01 | 0.9555E+00                        | 0.6327E+02 | 0.1241E-01 | 0.9187E+00 | 0.8221E+02 |  |  |
| 0.5132E-02 | 0.9664E+00 |            |                                   |            |            |            |            |  |  |
| 15         | 0.6999E+02 | 0.8822E-02 | 0.9635E+00                        | 0.6478E+02 | 0.9969E-02 | 0.9350E+00 | 0.8350E+02 |  |  |
| 0.4358E-02 | 0.9724E+00 |            |                                   |            |            |            |            |  |  |
| 20         | 0.7084E+02 | 0.7365E-02 | 0.9703E+00                        | 0.6628E+02 | 0.8103E-02 | 0.9483E+00 | 0.8478E+02 |  |  |
| 0.3638E-02 | 0.9774E+00 |            |                                   |            |            |            |            |  |  |
| 25         | 0.7169E+02 | 0.6078E-02 | 0.9759E+00                        | 0.6778E+02 | 0.6566E-02 | 0.9590E+00 | 0.8606E+02 |  |  |
| 0.2912E-02 | 0.9815E+00 |            |                                   |            |            |            |            |  |  |
| 30         | 0.7254E+02 | 0.4969E-02 | 0.9805E+00                        | 0.6929E+02 | 0.5340E-02 | 0.9678E+00 | 0.8735E+02 |  |  |
| 0.2360E-02 | 0.9848E+00 |            |                                   |            |            |            |            |  |  |
| 35         | 0.7339E+02 | 0.4057E-02 | 0.9842E+00                        | 0.7079E+02 | 0.4084E-02 | 0.9746E+00 | 0.8863E+02 |  |  |
| 0.2000E-02 | 0.9875E+00 |            |                                   |            |            |            |            |  |  |
| 40         | 0.7424E+02 | 0.3375E-02 | 0.9873E+00                        | 0.7229E+02 | 0.3172E-02 | 0.9799E+00 | 0.8991E+02 |  |  |
| 0.1681E-02 | 0.9898E+00 |            |                                   |            |            |            |            |  |  |
| 45         | 0.7509E+02 | 0.2745E-02 | 0.9898E+00                        | 0.7379E+02 | 0.2573E-02 | 0.9841E+00 | 0.9120E+02 |  |  |
| 0.1341E-02 | 0.9917E+00 |            |                                   |            |            |            |            |  |  |
| 50         | 0.7594E+02 | 0.2158E-02 | 0.9918E+00                        | 0.7530E+02 | 0.1985E-02 | 0.9874E+00 | 0.9248E+02 |  |  |
| 0.1087E-02 | 0.9933E+00 |            |                                   |            |            |            |            |  |  |
| 55         | 0.7678E+02 | 0.1752E-02 | 0.9935E+00                        | 0.7680E+02 | 0.1495E-02 | 0.9900E+00 | 0.9376E+02 |  |  |
| 0.9092E-03 | 0.9945E+00 |            |                                   |            |            |            |            |  |  |
| 60         | 0.7763E+02 | 0.1469E-02 | 0.9948E+00                        | 0.7830E+02 | 0.1261E-02 | 0.9920E+00 | 0.9505E+02 |  |  |
| 0.7424E-03 | 0.9955E+00 |            |                                   |            |            |            |            |  |  |

|     |                       | V2_Results_baseline_IEA_accel.dat |            |            |            |            |  |  |
|-----|-----------------------|-----------------------------------|------------|------------|------------|------------|--|--|
| 65  | 0.7848E+02 0.1224E-02 | 0.9959E+00                        | 0.7981E+02 | 0.1034E-02 | 0.9937E+00 | 0.9633E+02 |  |  |
|     | 0.6041E-03 0.9964E+00 |                                   |            |            |            |            |  |  |
| 70  | 0.7933E+02 0.9758E-03 | 0.9968E+00                        | 0.8131E+02 | 0.7802E-03 | 0.9950E+00 | 0.9761E+02 |  |  |
|     | 0.5187E-03 0.9971E+00 |                                   |            |            |            |            |  |  |
| 75  | 0.8018E+02 0.7156E-03 | 0.9975E+00                        | 0.8281E+02 | 0.5860E-03 | 0.9960E+00 | 0.9890E+02 |  |  |
|     | 0.4496E-03 0.9977E+00 |                                   |            |            |            |            |  |  |
| 80  | 0.8103E+02 0.5551E-03 | 0.9980E+00                        | 0.8431E+02 | 0.5298E-03 | 0.9968E+00 | 0.1002E+03 |  |  |
|     | 0.3738E-03 0.9982E+00 |                                   |            |            |            |            |  |  |
| 85  | 0.8188E+02 0.4501E-03 | 0.9985E+00                        | 0.8582E+02 | 0.4117E-03 | 0.9975E+00 | 0.1015E+03 |  |  |
|     | 0.2860E-03 0.9986E+00 |                                   |            |            |            |            |  |  |
| 90  | 0.8273E+02 0.3674E-03 | 0.9988E+00                        | 0.8732E+02 | 0.3260E-03 | 0.9980E+00 | 0.1027E+03 |  |  |
|     | 0.2171E-03 0.9989E+00 |                                   |            |            |            |            |  |  |
| 95  | 0.8357E+02 0.2664E-03 | 0.9991E+00                        | 0.8882E+02 | 0.2604E-03 | 0.9985E+00 | 0.1040E+03 |  |  |
|     | 0.1548E-03 0.9992E+00 |                                   |            |            |            |            |  |  |
| 100 | 0.8442E+02 0.1855E-03 | 0.9992E+00                        | 0.9033E+02 | 0.1956E-03 | 0.9988E+00 | 0.1053E+03 |  |  |
|     | 0.1144E-03 0.9993E+00 |                                   |            |            |            |            |  |  |
| 105 | 0.8527E+02 0.1405E-03 | 0.9994E+00                        | 0.9183E+02 | 0.1412E-03 | 0.9990E+00 | 0.1066E+03 |  |  |
|     | 0.7954E-04 0.9995E+00 |                                   |            |            |            |            |  |  |
| 110 | 0.8612E+02 0.1158E-03 | 0.9995E+00                        | 0.9333E+02 | 0.1104E-03 | 0.9992E+00 | 0.1079E+03 |  |  |
|     | 0.6448E-04 0.9995E+00 |                                   |            |            |            |            |  |  |
| 115 | 0.8697E+02 0.1076E-03 | 0.9996E+00                        | 0.9484E+02 | 0.8259E-04 | 0.9994E+00 | 0.1092E+03 |  |  |
|     | 0.5362E-04 0.9996E+00 |                                   |            |            |            |            |  |  |
| 120 | 0.8782E+02 0.8423E-04 | 0.9997E+00                        | 0.9634E+02 | 0.6047E-04 | 0.9995E+00 | 0.1104E+03 |  |  |
|     | 0.5033E-04 0.9997E+00 |                                   |            |            |            |            |  |  |
| 125 | 0.8867E+02 0.6520E-04 | 0.9997E+00                        | 0.9784E+02 | 0.6502E-04 | 0.9996E+00 | 0.1117E+03 |  |  |
|     | 0.5336E-04 0.9998E+00 |                                   |            |            |            |            |  |  |
| 130 | 0.8952E+02 0.5741E-04 | 0.9998E+00                        | 0.9934E+02 | 0.4651E-04 | 0.9996E+00 | 0.1130E+03 |  |  |
|     | 0.3929E-04 0.9998E+00 |                                   |            |            |            |            |  |  |
| 135 | 0.9037E+02 0.4587E-04 | 0.9998E+00                        | 0.1008E+03 | 0.6163E-04 | 0.9997E+00 | 0.1143E+03 |  |  |
|     | 0.2533E-04 0.9999E+00 |                                   |            |            |            |            |  |  |
| 140 | 0.9121E+02 0.3047E-04 | 0.9998E+00                        | 0.1023E+03 | 0.5802E-04 | 0.9998E+00 | 0.1156E+03 |  |  |
|     | 0.1277E-04 0.9999E+00 |                                   |            |            |            |            |  |  |
| 145 | 0.9206E+02 0.2443E-04 | 0.9999E+00                        | 0.1039E+03 | 0.2987E-04 | 0.9999E+00 | 0.1169E+03 |  |  |
|     | 0.1087E-04 0.9999E+00 |                                   |            |            |            |            |  |  |
| 150 | 0.9291E+02 0.2611E-04 | 0.9999E+00                        | 0.1054E+03 | 0.1862E-04 | 0.9999E+00 | 0.1181E+03 |  |  |
|     | 0.9870E-05 0.9999E+00 |                                   |            |            |            |            |  |  |

# V2\_Results\_baseline\_IEA\_accel.dat

|            |            |            |            |            |            |            |            |
|------------|------------|------------|------------|------------|------------|------------|------------|
| 155        | 0.9376E+02 | 0.3209E-04 | 0.9999E+00 | 0.1069E+03 | 0.1818E-04 | 0.9999E+00 | 0.1194E+03 |
| 0.1246E-04 | 0.9999E+00 |            |            |            |            |            |            |
| 160        | 0.9461E+02 | 0.2413E-04 | 0.9999E+00 | 0.1084E+03 | 0.1125E-04 | 0.1000E+01 | 0.1207E+03 |
| 0.1705E-04 | 0.9999E+00 |            |            |            |            |            |            |
| 165        | 0.9546E+02 | 0.1079E-04 | 0.9999E+00 | 0.1099E+03 | 0.3260E-05 | 0.1000E+01 | 0.1220E+03 |
| 0.1549E-04 | 0.1000E+01 |            |            |            |            |            |            |
| 170        | 0.9631E+02 | 0.9907E-05 | 0.1000E+01 | 0.1114E+03 | 0.7519E-05 | 0.1000E+01 | 0.1233E+03 |
| 0.8002E-05 | 0.1000E+01 |            |            |            |            |            |            |
| 175        | 0.9716E+02 | 0.1486E-04 | 0.1000E+01 | 0.1129E+03 | 0.6443E-05 | 0.1000E+01 | 0.1246E+03 |
| 0.3774E-05 | 0.1000E+01 |            |            |            |            |            |            |
| 180        | 0.9800E+02 | 0.1429E-04 | 0.1000E+01 | 0.1144E+03 | 0.3672E-05 | 0.1000E+01 | 0.1258E+03 |
| 0.3269E-05 | 0.1000E+01 |            |            |            |            |            |            |
| 185        | 0.9885E+02 | 0.5409E-05 | 0.1000E+01 | 0.1159E+03 | 0.0000E+00 | 0.1000E+01 | 0.1271E+03 |
| 0.4768E-05 | 0.1000E+01 |            |            |            |            |            |            |
| 190        | 0.9970E+02 | 0.2307E-05 | 0.1000E+01 | 0.1174E+03 | 0.0000E+00 | 0.1000E+01 | 0.1284E+03 |
| 0.3188E-05 | 0.1000E+01 |            |            |            |            |            |            |
| 195        | 0.1006E+03 | 0.6474E-05 | 0.1000E+01 | 0.1189E+03 | 0.9262E-06 | 0.1000E+01 | 0.1297E+03 |
| 0.4018E-05 | 0.1000E+01 |            |            |            |            |            |            |
| 200        | 0.1014E+03 | 0.9224E-05 | 0.1000E+01 | 0.1204E+03 | 0.3948E-05 | 0.1000E+01 | 0.1310E+03 |
| 0.2965E-05 | 0.1000E+01 |            |            |            |            |            |            |

| #    | *****       | Standardised | *****       |            |             |            |
|------|-------------|--------------|-------------|------------|-------------|------------|
| -200 | -0.3367E+01 | 0.3156E-04   | -0.2006E+01 | 0.2068E-02 | -0.3041E+01 | 0.6923E-04 |
| -195 | -0.3243E+01 | 0.5876E-04   | -0.1873E+01 | 0.8347E-02 | -0.2920E+01 | 0.1830E-03 |
| -190 | -0.3120E+01 | 0.1872E-03   | -0.1740E+01 | 0.2592E-01 | -0.2800E+01 | 0.5100E-03 |
| -185 | -0.2996E+01 | 0.3143E-03   | -0.1607E+01 | 0.5988E-01 | -0.2679E+01 | 0.1287E-02 |
| -180 | -0.2872E+01 | 0.5260E-03   | -0.1474E+01 | 0.1114E+00 | -0.2558E+01 | 0.2953E-02 |
| -175 | -0.2748E+01 | 0.1117E-02   | -0.1341E+01 | 0.1777E+00 | -0.2438E+01 | 0.5646E-02 |
| -170 | -0.2624E+01 | 0.2532E-02   | -0.1208E+01 | 0.2527E+00 | -0.2317E+01 | 0.9509E-02 |
| -165 | -0.2500E+01 | 0.4586E-02   | -0.1075E+01 | 0.3253E+00 | -0.2197E+01 | 0.1616E-01 |
| -160 | -0.2376E+01 | 0.8313E-02   | -0.9416E+00 | 0.3871E+00 | -0.2076E+01 | 0.2614E-01 |
| -155 | -0.2252E+01 | 0.1389E-01   | -0.8085E+00 | 0.4349E+00 | -0.1955E+01 | 0.4048E-01 |
| -150 | -0.2128E+01 | 0.2313E-01   | -0.6755E+00 | 0.4631E+00 | -0.1835E+01 | 0.5822E-01 |
| -145 | -0.2005E+01 | 0.3588E-01   | -0.5424E+00 | 0.4744E+00 | -0.1714E+01 | 0.8092E-01 |
| -140 | -0.1881E+01 | 0.5407E-01   | -0.4094E+00 | 0.4697E+00 | -0.1594E+01 | 0.1083E+00 |

V2\_Results\_baseline\_IEA\_accel.dat

|      |             |            |             |            |             |            |
|------|-------------|------------|-------------|------------|-------------|------------|
| -135 | -0.1757E+01 | 0.7650E-01 | -0.2763E+00 | 0.4557E+00 | -0.1473E+01 | 0.1410E+00 |
| -130 | -0.1633E+01 | 0.1028E+00 | -0.1433E+00 | 0.4337E+00 | -0.1353E+01 | 0.1791E+00 |
| -125 | -0.1509E+01 | 0.1343E+00 | -0.1020E-01 | 0.4065E+00 | -0.1232E+01 | 0.2213E+00 |
| -120 | -0.1385E+01 | 0.1700E+00 | 0.1229E+00  | 0.3719E+00 | -0.1111E+01 | 0.2638E+00 |
| -115 | -0.1261E+01 | 0.2090E+00 | 0.2559E+00  | 0.3383E+00 | -0.9908E+00 | 0.3014E+00 |
| -110 | -0.1137E+01 | 0.2479E+00 | 0.3890E+00  | 0.3075E+00 | -0.8702E+00 | 0.3326E+00 |
| -105 | -0.1014E+01 | 0.2866E+00 | 0.5220E+00  | 0.2751E+00 | -0.7496E+00 | 0.3595E+00 |
| -100 | -0.8896E+00 | 0.3210E+00 | 0.6551E+00  | 0.2409E+00 | -0.6290E+00 | 0.3808E+00 |
| -95  | -0.7658E+00 | 0.3516E+00 | 0.7881E+00  | 0.2097E+00 | -0.5084E+00 | 0.3960E+00 |
| -90  | -0.6419E+00 | 0.3751E+00 | 0.9212E+00  | 0.1824E+00 | -0.3878E+00 | 0.4088E+00 |
| -85  | -0.5180E+00 | 0.3926E+00 | 0.1054E+01  | 0.1580E+00 | -0.2673E+00 | 0.4154E+00 |
| -80  | -0.3941E+00 | 0.4029E+00 | 0.1187E+01  | 0.1372E+00 | -0.1467E+00 | 0.4143E+00 |
| -75  | -0.2702E+00 | 0.4073E+00 | 0.1320E+01  | 0.1184E+00 | -0.2609E-01 | 0.4035E+00 |
| -70  | -0.1463E+00 | 0.4075E+00 | 0.1453E+01  | 0.1006E+00 | 0.9449E-01  | 0.3866E+00 |
| -65  | -0.2244E-01 | 0.4005E+00 | 0.1586E+01  | 0.8585E-01 | 0.2151E+00  | 0.3661E+00 |
| -60  | 0.1014E+00  | 0.3844E+00 | 0.1720E+01  | 0.7419E-01 | 0.3357E+00  | 0.3437E+00 |
| -55  | 0.2253E+00  | 0.3641E+00 | 0.1853E+01  | 0.6392E-01 | 0.4563E+00  | 0.3190E+00 |
| -50  | 0.3492E+00  | 0.3432E+00 | 0.1986E+01  | 0.5498E-01 | 0.5768E+00  | 0.2926E+00 |
| -45  | 0.4731E+00  | 0.3220E+00 | 0.2119E+01  | 0.4776E-01 | 0.6974E+00  | 0.2667E+00 |
| -40  | 0.5970E+00  | 0.2961E+00 | 0.2252E+01  | 0.4093E-01 | 0.8180E+00  | 0.2427E+00 |
| -35  | 0.7209E+00  | 0.2705E+00 | 0.2385E+01  | 0.3378E-01 | 0.9386E+00  | 0.2168E+00 |
| -30  | 0.8448E+00  | 0.2413E+00 | 0.2518E+01  | 0.2810E-01 | 0.1059E+01  | 0.1914E+00 |
| -25  | 0.9686E+00  | 0.2144E+00 | 0.2651E+01  | 0.2364E-01 | 0.1180E+01  | 0.1674E+00 |
| -20  | 0.1093E+01  | 0.1877E+00 | 0.2784E+01  | 0.2058E-01 | 0.1300E+01  | 0.1458E+00 |
| -15  | 0.1216E+01  | 0.1646E+00 | 0.2917E+01  | 0.1722E-01 | 0.1421E+01  | 0.1266E+00 |
| -10  | 0.1340E+01  | 0.1417E+00 | 0.3050E+01  | 0.1416E-01 | 0.1542E+01  | 0.1087E+00 |
| -5   | 0.1464E+01  | 0.1211E+00 | 0.3183E+01  | 0.1167E-01 | 0.1662E+01  | 0.9316E-01 |
| 0    | 0.1588E+01  | 0.1016E+00 | 0.3316E+01  | 0.1037E-01 | 0.1783E+01  | 0.7862E-01 |
| 5    | 0.1712E+01  | 0.8545E-01 | 0.3449E+01  | 0.9039E-02 | 0.1903E+01  | 0.6566E-01 |
| 10   | 0.1836E+01  | 0.7188E-01 | 0.3582E+01  | 0.7758E-02 | 0.2024E+01  | 0.5462E-01 |
| 15   | 0.1960E+01  | 0.6045E-01 | 0.3715E+01  | 0.6351E-02 | 0.2144E+01  | 0.4638E-01 |
| 20   | 0.2084E+01  | 0.5047E-01 | 0.3848E+01  | 0.5079E-02 | 0.2265E+01  | 0.3872E-01 |
| 25   | 0.2207E+01  | 0.4165E-01 | 0.3981E+01  | 0.4583E-02 | 0.2386E+01  | 0.3100E-01 |
| 30   | 0.2331E+01  | 0.3405E-01 | 0.4115E+01  | 0.4194E-02 | 0.2506E+01  | 0.2512E-01 |
| 35   | 0.2455E+01  | 0.2780E-01 | 0.4248E+01  | 0.3517E-02 | 0.2627E+01  | 0.2129E-01 |
| 40   | 0.2579E+01  | 0.2312E-01 | 0.4381E+01  | 0.2855E-02 | 0.2747E+01  | 0.1789E-01 |

# V2\_Results\_baseline\_IEA\_accel.dat

|     |            |            |            |            |            |            |
|-----|------------|------------|------------|------------|------------|------------|
| 45  | 0.2703E+01 | 0.1881E-01 | 0.4514E+01 | 0.2549E-02 | 0.2868E+01 | 0.1427E-01 |
| 50  | 0.2827E+01 | 0.1479E-01 | 0.4647E+01 | 0.2177E-02 | 0.2989E+01 | 0.1157E-01 |
| 55  | 0.2951E+01 | 0.1200E-01 | 0.4780E+01 | 0.1770E-02 | 0.3109E+01 | 0.9676E-02 |
| 60  | 0.3075E+01 | 0.1006E-01 | 0.4913E+01 | 0.1387E-02 | 0.3230E+01 | 0.7902E-02 |
| 65  | 0.3199E+01 | 0.8387E-02 | 0.5046E+01 | 0.1132E-02 | 0.3350E+01 | 0.6429E-02 |
| 70  | 0.3322E+01 | 0.6686E-02 | 0.5179E+01 | 0.9574E-03 | 0.3471E+01 | 0.5521E-02 |
| 75  | 0.3446E+01 | 0.4903E-02 | 0.5312E+01 | 0.8229E-03 | 0.3591E+01 | 0.4785E-02 |
| 80  | 0.3570E+01 | 0.3803E-02 | 0.5445E+01 | 0.6164E-03 | 0.3712E+01 | 0.3978E-02 |
| 85  | 0.3694E+01 | 0.3084E-02 | 0.5578E+01 | 0.4579E-03 | 0.3833E+01 | 0.3044E-02 |
| 90  | 0.3818E+01 | 0.2517E-02 | 0.5711E+01 | 0.5135E-03 | 0.3953E+01 | 0.2310E-02 |
| 95  | 0.3942E+01 | 0.1825E-02 | 0.5844E+01 | 0.4965E-03 | 0.4074E+01 | 0.1647E-02 |
| 100 | 0.4066E+01 | 0.1271E-02 | 0.5977E+01 | 0.3835E-03 | 0.4194E+01 | 0.1217E-02 |
| 105 | 0.4190E+01 | 0.9627E-03 | 0.6110E+01 | 0.4231E-03 | 0.4315E+01 | 0.8465E-03 |
| 110 | 0.4314E+01 | 0.7933E-03 | 0.6243E+01 | 0.5246E-03 | 0.4436E+01 | 0.6862E-03 |
| 115 | 0.4437E+01 | 0.7374E-03 | 0.6376E+01 | 0.4546E-03 | 0.4556E+01 | 0.5707E-03 |
| 120 | 0.4561E+01 | 0.5771E-03 | 0.6509E+01 | 0.2904E-03 | 0.4677E+01 | 0.5356E-03 |
| 125 | 0.4685E+01 | 0.4468E-03 | 0.6643E+01 | 0.1670E-03 | 0.4797E+01 | 0.5679E-03 |
| 130 | 0.4809E+01 | 0.3934E-03 | 0.6776E+01 | 0.1373E-03 | 0.4918E+01 | 0.4182E-03 |
| 135 | 0.4933E+01 | 0.3143E-03 | 0.6909E+01 | 0.1442E-03 | 0.5039E+01 | 0.2696E-03 |
| 140 | 0.5057E+01 | 0.2088E-03 | 0.7042E+01 | 0.1226E-03 | 0.5159E+01 | 0.1359E-03 |
| 145 | 0.5181E+01 | 0.1674E-03 | 0.7175E+01 | 0.7671E-04 | 0.5280E+01 | 0.1157E-03 |
| 150 | 0.5305E+01 | 0.1789E-03 | 0.7308E+01 | 0.2619E-04 | 0.5400E+01 | 0.1050E-03 |
| 155 | 0.5429E+01 | 0.2199E-03 | 0.7441E+01 | 0.5309E-04 | 0.5521E+01 | 0.1326E-03 |
| 160 | 0.5552E+01 | 0.1653E-03 | 0.7574E+01 | 0.5727E-04 | 0.5641E+01 | 0.1815E-03 |
| 165 | 0.5676E+01 | 0.7394E-04 | 0.7707E+01 | 0.4673E-04 | 0.5762E+01 | 0.1649E-03 |
| 170 | 0.5800E+01 | 0.6788E-04 | 0.7840E+01 | 0.3127E-04 | 0.5883E+01 | 0.8516E-04 |
| 175 | 0.5924E+01 | 0.1018E-03 | 0.7973E+01 | 0.1726E-04 | 0.6003E+01 | 0.4017E-04 |
| 180 | 0.6048E+01 | 0.9789E-04 | 0.8106E+01 | 0.0000E+00 | 0.6124E+01 | 0.3479E-04 |
| 185 | 0.6172E+01 | 0.3706E-04 | 0.8239E+01 | 0.0000E+00 | 0.6244E+01 | 0.5074E-04 |
| 190 | 0.6296E+01 | 0.1581E-04 | 0.8372E+01 | 0.0000E+00 | 0.6365E+01 | 0.3393E-04 |
| 195 | 0.6420E+01 | 0.4436E-04 | 0.8505E+01 | 0.1957E-04 | 0.6486E+01 | 0.4277E-04 |
| 200 | 0.6543E+01 | 0.6320E-04 | 0.8638E+01 | 0.3158E-04 | 0.6606E+01 | 0.3156E-04 |

\*\*\*\*\*

\*\*\* p.d.f. LCE (US\$/MWh): TOTAL 2020, 2030, 2040 ,2050 (Smoothed, Not standardised) \*\*\*

# V2\_Results\_baseline\_IEA\_accel.dat

```

#*****
#
#          2020          2030          2040          2050
#
#  *****      NOT standardised      *****
#
# -200  0.3624E+02  0.1411E-04  0.1219E+00  0.4565E-05  0.4351E+02  0.1212E-04  0.2260E+02
# 0.2361E-04
# -195  0.3737E+02  0.3373E-04  0.1341E+01  0.1500E-05  0.4451E+02  0.2151E-04  0.2352E+02
# 0.7301E-04
# -190  0.3849E+02  0.6532E-04  0.2559E+01  0.0000E+00  0.4551E+02  0.3969E-04  0.2444E+02
# 0.1645E-03
# -185  0.3962E+02  0.1572E-03  0.3778E+01  0.0000E+00  0.4652E+02  0.1230E-03  0.2536E+02
# 0.3706E-03
# -180  0.4075E+02  0.3807E-03  0.4997E+01  0.0000E+00  0.4752E+02  0.2803E-03  0.2628E+02
# 0.7526E-03
# -175  0.4188E+02  0.8212E-03  0.6216E+01  0.0000E+00  0.4852E+02  0.5638E-03  0.2720E+02
# 0.1448E-02
# -170  0.4301E+02  0.1518E-02  0.7434E+01  0.0000E+00  0.4952E+02  0.1069E-02  0.2812E+02
# 0.2807E-02
# -165  0.4414E+02  0.2675E-02  0.8653E+01  0.0000E+00  0.5052E+02  0.1911E-02  0.2904E+02
# 0.4983E-02
# -160  0.4527E+02  0.4707E-02  0.9872E+01  0.0000E+00  0.5152E+02  0.3277E-02  0.2996E+02
# 0.7905E-02
# -155  0.4640E+02  0.7524E-02  0.1109E+02  0.0000E+00  0.5252E+02  0.5368E-02  0.3088E+02
# 0.1193E-01
# -150  0.4753E+02  0.1106E-01  0.1231E+02  0.0000E+00  0.5352E+02  0.8091E-02  0.3180E+02
# 0.1709E-01
# -145  0.4866E+02  0.1521E-01  0.1353E+02  0.0000E+00  0.5452E+02  0.1146E-01  0.3272E+02
# 0.2305E-01
# -140  0.4979E+02  0.2002E-01  0.1475E+02  0.0000E+00  0.5553E+02  0.1556E-01  0.3364E+02
# 0.2949E-01
# -135  0.5092E+02  0.2519E-01  0.1597E+02  0.0000E+00  0.5653E+02  0.2060E-01  0.3456E+02
# 0.3637E-01
# -130  0.5205E+02  0.3053E-01  0.1718E+02  0.0000E+00  0.5753E+02  0.2593E-01  0.3548E+02
# 0.4275E-01
# -125  0.5318E+02  0.3588E-01  0.1840E+02  0.0000E+00  0.5853E+02  0.3140E-01  0.3639E+02

```

V2\_Results\_baseline\_IEA\_accel.dat

|            |            |            |            |            |            |            |            |
|------------|------------|------------|------------|------------|------------|------------|------------|
| 0.4870E-01 |            |            |            |            |            |            |            |
| -120       | 0.5431E+02 | 0.4074E-01 | 0.1962E+02 | 0.0000E+00 | 0.5953E+02 | 0.3661E-01 | 0.3731E+02 |
| 0.5375E-01 |            |            |            |            |            |            |            |
| -115       | 0.5544E+02 | 0.4486E-01 | 0.2084E+02 | 0.0000E+00 | 0.6053E+02 | 0.4132E-01 | 0.3823E+02 |
| 0.5708E-01 |            |            |            |            |            |            |            |
| -110       | 0.5657E+02 | 0.4794E-01 | 0.2206E+02 | 0.0000E+00 | 0.6153E+02 | 0.4524E-01 | 0.3915E+02 |
| 0.5927E-01 |            |            |            |            |            |            |            |
| -105       | 0.5770E+02 | 0.4955E-01 | 0.2328E+02 | 0.0000E+00 | 0.6253E+02 | 0.4892E-01 | 0.4007E+02 |
| 0.6081E-01 |            |            |            |            |            |            |            |
| -100       | 0.5883E+02 | 0.5031E-01 | 0.2450E+02 | 0.0000E+00 | 0.6353E+02 | 0.5185E-01 | 0.4099E+02 |
| 0.6119E-01 |            |            |            |            |            |            |            |
| -95        | 0.5996E+02 | 0.5001E-01 | 0.2572E+02 | 0.0000E+00 | 0.6453E+02 | 0.5350E-01 | 0.4191E+02 |
| 0.6019E-01 |            |            |            |            |            |            |            |
| -90        | 0.6109E+02 | 0.4856E-01 | 0.2693E+02 | 0.4852E-05 | 0.6554E+02 | 0.5341E-01 | 0.4283E+02 |
| 0.5808E-01 |            |            |            |            |            |            |            |
| -85        | 0.6222E+02 | 0.4636E-01 | 0.2815E+02 | 0.1161E-04 | 0.6654E+02 | 0.5208E-01 | 0.4375E+02 |
| 0.5486E-01 |            |            |            |            |            |            |            |
| -80        | 0.6335E+02 | 0.4364E-01 | 0.2937E+02 | 0.5551E-04 | 0.6754E+02 | 0.5046E-01 | 0.4467E+02 |
| 0.5070E-01 |            |            |            |            |            |            |            |
| -75        | 0.6448E+02 | 0.4012E-01 | 0.3059E+02 | 0.2405E-03 | 0.6854E+02 | 0.4860E-01 | 0.4559E+02 |
| 0.4610E-01 |            |            |            |            |            |            |            |
| -70        | 0.6561E+02 | 0.3632E-01 | 0.3181E+02 | 0.6836E-03 | 0.6954E+02 | 0.4618E-01 | 0.4651E+02 |
| 0.4187E-01 |            |            |            |            |            |            |            |
| -65        | 0.6674E+02 | 0.3283E-01 | 0.3303E+02 | 0.1785E-02 | 0.7054E+02 | 0.4269E-01 | 0.4743E+02 |
| 0.3755E-01 |            |            |            |            |            |            |            |
| -60        | 0.6787E+02 | 0.2915E-01 | 0.3425E+02 | 0.3819E-02 | 0.7154E+02 | 0.3900E-01 | 0.4835E+02 |
| 0.3309E-01 |            |            |            |            |            |            |            |
| -55        | 0.6900E+02 | 0.2550E-01 | 0.3547E+02 | 0.7287E-02 | 0.7254E+02 | 0.3546E-01 | 0.4927E+02 |
| 0.2888E-01 |            |            |            |            |            |            |            |
| -50        | 0.7013E+02 | 0.2223E-01 | 0.3668E+02 | 0.1278E-01 | 0.7354E+02 | 0.3209E-01 | 0.5019E+02 |
| 0.2548E-01 |            |            |            |            |            |            |            |
| -45        | 0.7126E+02 | 0.1948E-01 | 0.3790E+02 | 0.1971E-01 | 0.7455E+02 | 0.2898E-01 | 0.5110E+02 |
| 0.2193E-01 |            |            |            |            |            |            |            |
| -40        | 0.7239E+02 | 0.1693E-01 | 0.3912E+02 | 0.2754E-01 | 0.7555E+02 | 0.2558E-01 | 0.5202E+02 |
| 0.1848E-01 |            |            |            |            |            |            |            |
| -35        | 0.7352E+02 | 0.1434E-01 | 0.4034E+02 | 0.3640E-01 | 0.7655E+02 | 0.2219E-01 | 0.5294E+02 |

V2\_Results\_baseline\_IEA\_accel.dat

|            |            |            |            |            |            |            |            |
|------------|------------|------------|------------|------------|------------|------------|------------|
| 0.1556E-01 |            |            |            |            |            |            |            |
| -30        | 0.7465E+02 | 0.1205E-01 | 0.4156E+02 | 0.4499E-01 | 0.7755E+02 | 0.1904E-01 | 0.5386E+02 |
| 0.1311E-01 |            |            |            |            |            |            |            |
| -25        | 0.7578E+02 | 0.1026E-01 | 0.4278E+02 | 0.5207E-01 | 0.7855E+02 | 0.1639E-01 | 0.5478E+02 |
| 0.1118E-01 |            |            |            |            |            |            |            |
| -20        | 0.7691E+02 | 0.8757E-02 | 0.4400E+02 | 0.5747E-01 | 0.7955E+02 | 0.1395E-01 | 0.5570E+02 |
| 0.9342E-02 |            |            |            |            |            |            |            |
| -15        | 0.7804E+02 | 0.7258E-02 | 0.4522E+02 | 0.6101E-01 | 0.8055E+02 | 0.1206E-01 | 0.5662E+02 |
| 0.7536E-02 |            |            |            |            |            |            |            |
| -10        | 0.7917E+02 | 0.5964E-02 | 0.4643E+02 | 0.6173E-01 | 0.8155E+02 | 0.1038E-01 | 0.5754E+02 |
| 0.6036E-02 |            |            |            |            |            |            |            |
| -5         | 0.8030E+02 | 0.4785E-02 | 0.4765E+02 | 0.5947E-01 | 0.8255E+02 | 0.8681E-02 | 0.5846E+02 |
| 0.5089E-02 |            |            |            |            |            |            |            |
| 0          | 0.8143E+02 | 0.3858E-02 | 0.4887E+02 | 0.5604E-01 | 0.8356E+02 | 0.7127E-02 | 0.5938E+02 |
| 0.4312E-02 |            |            |            |            |            |            |            |
| 5          | 0.8256E+02 | 0.3177E-02 | 0.5009E+02 | 0.5164E-01 | 0.8456E+02 | 0.5862E-02 | 0.6030E+02 |
| 0.3503E-02 |            |            |            |            |            |            |            |
| 10         | 0.8369E+02 | 0.2644E-02 | 0.5131E+02 | 0.4581E-01 | 0.8556E+02 | 0.4801E-02 | 0.6122E+02 |
| 0.2757E-02 |            |            |            |            |            |            |            |
| 15         | 0.8482E+02 | 0.2156E-02 | 0.5253E+02 | 0.4009E-01 | 0.8656E+02 | 0.3878E-02 | 0.6214E+02 |
| 0.2199E-02 |            |            |            |            |            |            |            |
| 20         | 0.8595E+02 | 0.1709E-02 | 0.5375E+02 | 0.3497E-01 | 0.8756E+02 | 0.3234E-02 | 0.6306E+02 |
| 0.1812E-02 |            |            |            |            |            |            |            |
| 25         | 0.8708E+02 | 0.1370E-02 | 0.5497E+02 | 0.3006E-01 | 0.8856E+02 | 0.2659E-02 | 0.6398E+02 |
| 0.1535E-02 |            |            |            |            |            |            |            |
| 30         | 0.8821E+02 | 0.1186E-02 | 0.5618E+02 | 0.2441E-01 | 0.8956E+02 | 0.2175E-02 | 0.6489E+02 |
| 0.1246E-02 |            |            |            |            |            |            |            |
| 35         | 0.8934E+02 | 0.9739E-03 | 0.5740E+02 | 0.1932E-01 | 0.9056E+02 | 0.1706E-02 | 0.6581E+02 |
| 0.9549E-03 |            |            |            |            |            |            |            |
| 40         | 0.9047E+02 | 0.7540E-03 | 0.5862E+02 | 0.1573E-01 | 0.9156E+02 | 0.1442E-02 | 0.6673E+02 |
| 0.8172E-03 |            |            |            |            |            |            |            |
| 45         | 0.9160E+02 | 0.5766E-03 | 0.5984E+02 | 0.1276E-01 | 0.9257E+02 | 0.1203E-02 | 0.6765E+02 |
| 0.6967E-03 |            |            |            |            |            |            |            |
| 50         | 0.9273E+02 | 0.4977E-03 | 0.6106E+02 | 0.1009E-01 | 0.9357E+02 | 0.9475E-03 | 0.6857E+02 |
| 0.5267E-03 |            |            |            |            |            |            |            |
| 55         | 0.9386E+02 | 0.4275E-03 | 0.6228E+02 | 0.7736E-02 | 0.9457E+02 | 0.6768E-03 | 0.6949E+02 |



V2\_Results\_baseline\_IEA\_accel.dat

|            |     |            |            |            |            |            |            |            |
|------------|-----|------------|------------|------------|------------|------------|------------|------------|
| 0.3869E-03 | 60  | 0.9499E+02 | 0.3633E-03 | 0.6350E+02 | 0.5804E-02 | 0.9557E+02 | 0.5324E-03 | 0.7041E+02 |
| 0.3338E-03 | 65  | 0.9612E+02 | 0.3068E-03 | 0.6472E+02 | 0.4567E-02 | 0.9657E+02 | 0.4387E-03 | 0.7133E+02 |
| 0.2876E-03 | 70  | 0.9725E+02 | 0.2438E-03 | 0.6593E+02 | 0.3505E-02 | 0.9757E+02 | 0.3583E-03 | 0.7225E+02 |
| 0.2430E-03 | 75  | 0.9838E+02 | 0.1925E-03 | 0.6715E+02 | 0.2618E-02 | 0.9857E+02 | 0.2859E-03 | 0.7317E+02 |
| 0.1772E-03 | 80  | 0.9951E+02 | 0.1786E-03 | 0.6837E+02 | 0.2081E-02 | 0.9957E+02 | 0.2395E-03 | 0.7409E+02 |
| 0.1406E-03 | 85  | 0.1006E+03 | 0.1540E-03 | 0.6959E+02 | 0.1562E-02 | 0.1006E+03 | 0.2078E-03 | 0.7501E+02 |
| 0.1230E-03 | 90  | 0.1018E+03 | 0.1142E-03 | 0.7081E+02 | 0.1165E-02 | 0.1016E+03 | 0.1632E-03 | 0.7593E+02 |
| 0.1086E-03 | 95  | 0.1029E+03 | 0.7202E-04 | 0.7203E+02 | 0.8535E-03 | 0.1026E+03 | 0.1092E-03 | 0.7685E+02 |
| 0.7938E-04 | 100 | 0.1040E+03 | 0.5541E-04 | 0.7325E+02 | 0.6210E-03 | 0.1036E+03 | 0.7837E-04 | 0.7777E+02 |
| 0.6192E-04 | 105 | 0.1052E+03 | 0.4817E-04 | 0.7447E+02 | 0.4986E-03 | 0.1046E+03 | 0.7264E-04 | 0.7869E+02 |
| 0.5226E-04 | 110 | 0.1063E+03 | 0.4754E-04 | 0.7568E+02 | 0.3919E-03 | 0.1056E+03 | 0.8245E-04 | 0.7960E+02 |
| 0.4458E-04 | 115 | 0.1074E+03 | 0.4709E-04 | 0.7690E+02 | 0.2964E-03 | 0.1066E+03 | 0.7031E-04 | 0.8052E+02 |
| 0.3385E-04 | 120 | 0.1085E+03 | 0.4100E-04 | 0.7812E+02 | 0.2209E-03 | 0.1076E+03 | 0.5090E-04 | 0.8144E+02 |
| 0.2822E-04 | 125 | 0.1097E+03 | 0.3876E-04 | 0.7934E+02 | 0.1776E-03 | 0.1086E+03 | 0.2993E-04 | 0.8236E+02 |
| 0.3648E-04 | 130 | 0.1108E+03 | 0.3703E-04 | 0.8056E+02 | 0.1143E-03 | 0.1096E+03 | 0.2288E-04 | 0.8328E+02 |
| 0.3698E-04 | 135 | 0.1119E+03 | 0.3131E-04 | 0.8178E+02 | 0.7622E-04 | 0.1106E+03 | 0.1270E-04 | 0.8420E+02 |
| 0.2714E-04 | 140 | 0.1131E+03 | 0.1402E-04 | 0.8300E+02 | 0.7019E-04 | 0.1116E+03 | 0.8346E-05 | 0.8512E+02 |
| 0.1467E-04 | 145 | 0.1142E+03 | 0.1090E-04 | 0.8422E+02 | 0.4480E-04 | 0.1126E+03 | 0.9203E-05 | 0.8604E+02 |

# V2\_Results\_baseline\_IEA\_accel.dat

```

0.5624E-05
 150  0.1153E+03  0.1303E-04  0.8543E+02  0.2457E-04  0.1136E+03  0.1297E-04  0.8696E+02
0.1811E-05
 155  0.1165E+03  0.1104E-04  0.8665E+02  0.1959E-04  0.1146E+03  0.1369E-04  0.8788E+02
0.4360E-05
 160  0.1176E+03  0.4662E-05  0.8787E+02  0.1417E-04  0.1156E+03  0.1130E-04  0.8880E+02
0.1827E-04
 165  0.1187E+03  0.4393E-05  0.8909E+02  0.1386E-04  0.1166E+03  0.4314E-05  0.8972E+02
0.2520E-04
 170  0.1198E+03  0.3631E-05  0.9031E+02  0.2540E-04  0.1176E+03  0.6885E-06  0.9064E+02
0.1805E-04
 175  0.1210E+03  0.9601E-05  0.9153E+02  0.1817E-04  0.1186E+03  0.0000E+00  0.9156E+02
0.8063E-05
 180  0.1221E+03  0.1121E-04  0.9275E+02  0.2399E-05  0.1196E+03  0.0000E+00  0.9248E+02
0.2949E-05
 185  0.1232E+03  0.1167E-04  0.9397E+02  0.0000E+00  0.1206E+03  0.0000E+00  0.9339E+02
0.2281E-05
 190  0.1244E+03  0.7631E-05  0.9518E+02  0.3761E-05  0.1216E+03  0.0000E+00  0.9431E+02
0.4488E-05
 195  0.1255E+03  0.8592E-05  0.9640E+02  0.5617E-05  0.1226E+03  0.2619E-05  0.9523E+02
0.6627E-05
 200  0.1266E+03  0.4879E-05  0.9762E+02  0.4565E-05  0.1236E+03  0.4017E-05  0.9615E+02
0.4774E-05

```

# \*\*\*\*\* adaptados para un plot en 3D con gnuplot \*\*\*\*\*

```

0.3624E+02  0.1411E-04  0.2020E+04  0xff0000
0.3737E+02  0.3373E-04  0.2020E+04  0xff0000
0.3849E+02  0.6532E-04  0.2020E+04  0xff0000
0.3962E+02  0.1572E-03  0.2020E+04  0xff0000
0.4075E+02  0.3807E-03  0.2020E+04  0xff0000
0.4188E+02  0.8212E-03  0.2020E+04  0xff0000
0.4301E+02  0.1518E-02  0.2020E+04  0xff0000
0.4414E+02  0.2675E-02  0.2020E+04  0xff0000
0.4527E+02  0.4707E-02  0.2020E+04  0xff0000
0.4640E+02  0.7524E-02  0.2020E+04  0xff0000

```

V2\_Results\_baseline\_IEA\_accel.dat

|            |            |            |          |
|------------|------------|------------|----------|
| 0.4753E+02 | 0.1106E-01 | 0.2020E+04 | 0xff0000 |
| 0.4866E+02 | 0.1521E-01 | 0.2020E+04 | 0xff0000 |
| 0.4979E+02 | 0.2002E-01 | 0.2020E+04 | 0xff0000 |
| 0.5092E+02 | 0.2519E-01 | 0.2020E+04 | 0xff0000 |
| 0.5205E+02 | 0.3053E-01 | 0.2020E+04 | 0xff0000 |
| 0.5318E+02 | 0.3588E-01 | 0.2020E+04 | 0xff0000 |
| 0.5431E+02 | 0.4074E-01 | 0.2020E+04 | 0xff0000 |
| 0.5544E+02 | 0.4486E-01 | 0.2020E+04 | 0xff0000 |
| 0.5657E+02 | 0.4794E-01 | 0.2020E+04 | 0xff0000 |
| 0.5770E+02 | 0.4955E-01 | 0.2020E+04 | 0xff0000 |
| 0.5883E+02 | 0.5031E-01 | 0.2020E+04 | 0xff0000 |
| 0.5996E+02 | 0.5001E-01 | 0.2020E+04 | 0xff0000 |
| 0.6109E+02 | 0.4856E-01 | 0.2020E+04 | 0xff0000 |
| 0.6222E+02 | 0.4636E-01 | 0.2020E+04 | 0xff0000 |
| 0.6335E+02 | 0.4364E-01 | 0.2020E+04 | 0xff0000 |
| 0.6448E+02 | 0.4012E-01 | 0.2020E+04 | 0xff0000 |
| 0.6561E+02 | 0.3632E-01 | 0.2020E+04 | 0xff0000 |
| 0.6674E+02 | 0.3283E-01 | 0.2020E+04 | 0xff0000 |
| 0.6787E+02 | 0.2915E-01 | 0.2020E+04 | 0xff0000 |
| 0.6900E+02 | 0.2550E-01 | 0.2020E+04 | 0xff0000 |
| 0.7013E+02 | 0.2223E-01 | 0.2020E+04 | 0xff0000 |
| 0.7126E+02 | 0.1948E-01 | 0.2020E+04 | 0xff0000 |
| 0.7239E+02 | 0.1693E-01 | 0.2020E+04 | 0xff0000 |
| 0.7352E+02 | 0.1434E-01 | 0.2020E+04 | 0xff0000 |
| 0.7465E+02 | 0.1205E-01 | 0.2020E+04 | 0xff0000 |
| 0.7578E+02 | 0.1026E-01 | 0.2020E+04 | 0xff0000 |
| 0.7691E+02 | 0.8757E-02 | 0.2020E+04 | 0xff0000 |
| 0.7804E+02 | 0.7258E-02 | 0.2020E+04 | 0xff0000 |
| 0.7917E+02 | 0.5964E-02 | 0.2020E+04 | 0xff0000 |
| 0.8030E+02 | 0.4785E-02 | 0.2020E+04 | 0xff0000 |
| 0.8143E+02 | 0.3858E-02 | 0.2020E+04 | 0xff0000 |
| 0.8256E+02 | 0.3177E-02 | 0.2020E+04 | 0xff0000 |
| 0.8369E+02 | 0.2644E-02 | 0.2020E+04 | 0xff0000 |
| 0.8482E+02 | 0.2156E-02 | 0.2020E+04 | 0xff0000 |
| 0.8595E+02 | 0.1709E-02 | 0.2020E+04 | 0xff0000 |
| 0.8708E+02 | 0.1370E-02 | 0.2020E+04 | 0xff0000 |

V2\_Results\_baseline\_IEA\_accel.dat

|            |            |            |          |
|------------|------------|------------|----------|
| 0.8821E+02 | 0.1186E-02 | 0.2020E+04 | 0xff0000 |
| 0.8934E+02 | 0.9739E-03 | 0.2020E+04 | 0xff0000 |
| 0.9047E+02 | 0.7540E-03 | 0.2020E+04 | 0xff0000 |
| 0.9160E+02 | 0.5766E-03 | 0.2020E+04 | 0xff0000 |
| 0.9273E+02 | 0.4977E-03 | 0.2020E+04 | 0xff0000 |
| 0.9386E+02 | 0.4275E-03 | 0.2020E+04 | 0xff0000 |
| 0.9499E+02 | 0.3633E-03 | 0.2020E+04 | 0xff0000 |
| 0.9612E+02 | 0.3068E-03 | 0.2020E+04 | 0xff0000 |
| 0.9725E+02 | 0.2438E-03 | 0.2020E+04 | 0xff0000 |
| 0.9838E+02 | 0.1925E-03 | 0.2020E+04 | 0xff0000 |
| 0.9951E+02 | 0.1786E-03 | 0.2020E+04 | 0xff0000 |
| 0.1006E+03 | 0.1540E-03 | 0.2020E+04 | 0xff0000 |
| 0.1018E+03 | 0.1142E-03 | 0.2020E+04 | 0xff0000 |
| 0.1029E+03 | 0.7202E-04 | 0.2020E+04 | 0xff0000 |
| 0.1040E+03 | 0.5541E-04 | 0.2020E+04 | 0xff0000 |
| 0.1052E+03 | 0.4817E-04 | 0.2020E+04 | 0xff0000 |
| 0.1063E+03 | 0.4754E-04 | 0.2020E+04 | 0xff0000 |
| 0.1074E+03 | 0.4709E-04 | 0.2020E+04 | 0xff0000 |
| 0.1085E+03 | 0.4100E-04 | 0.2020E+04 | 0xff0000 |
| 0.1097E+03 | 0.3876E-04 | 0.2020E+04 | 0xff0000 |
| 0.1108E+03 | 0.3703E-04 | 0.2020E+04 | 0xff0000 |
| 0.1119E+03 | 0.3131E-04 | 0.2020E+04 | 0xff0000 |
| 0.1131E+03 | 0.1402E-04 | 0.2020E+04 | 0xff0000 |
| 0.1142E+03 | 0.1090E-04 | 0.2020E+04 | 0xff0000 |
| 0.1153E+03 | 0.1303E-04 | 0.2020E+04 | 0xff0000 |
| 0.1165E+03 | 0.1104E-04 | 0.2020E+04 | 0xff0000 |
| 0.1176E+03 | 0.4662E-05 | 0.2020E+04 | 0xff0000 |
| 0.1187E+03 | 0.4393E-05 | 0.2020E+04 | 0xff0000 |
| 0.1198E+03 | 0.3631E-05 | 0.2020E+04 | 0xff0000 |
| 0.1210E+03 | 0.9601E-05 | 0.2020E+04 | 0xff0000 |
| 0.1221E+03 | 0.1121E-04 | 0.2020E+04 | 0xff0000 |
| 0.1232E+03 | 0.1167E-04 | 0.2020E+04 | 0xff0000 |
| 0.1244E+03 | 0.7631E-05 | 0.2020E+04 | 0xff0000 |
| 0.1255E+03 | 0.8592E-05 | 0.2020E+04 | 0xff0000 |
| 0.1266E+03 | 0.4879E-05 | 0.2020E+04 | 0xff0000 |

V2\_Results\_baseline\_IEA\_accel.dat

|            |            |            |           |
|------------|------------|------------|-----------|
| 0.1219E+00 | 0.4565E-05 | 0.2030E+04 | 0xfffff00 |
| 0.1341E+01 | 0.1500E-05 | 0.2030E+04 | 0xfffff00 |
| 0.2559E+01 | 0.0000E+00 | 0.2030E+04 | 0xfffff00 |
| 0.3778E+01 | 0.0000E+00 | 0.2030E+04 | 0xfffff00 |
| 0.4997E+01 | 0.0000E+00 | 0.2030E+04 | 0xfffff00 |
| 0.6216E+01 | 0.0000E+00 | 0.2030E+04 | 0xfffff00 |
| 0.7434E+01 | 0.0000E+00 | 0.2030E+04 | 0xfffff00 |
| 0.8653E+01 | 0.0000E+00 | 0.2030E+04 | 0xfffff00 |
| 0.9872E+01 | 0.0000E+00 | 0.2030E+04 | 0xfffff00 |
| 0.1109E+02 | 0.0000E+00 | 0.2030E+04 | 0xfffff00 |
| 0.1231E+02 | 0.0000E+00 | 0.2030E+04 | 0xfffff00 |
| 0.1353E+02 | 0.0000E+00 | 0.2030E+04 | 0xfffff00 |
| 0.1475E+02 | 0.0000E+00 | 0.2030E+04 | 0xfffff00 |
| 0.1597E+02 | 0.0000E+00 | 0.2030E+04 | 0xfffff00 |
| 0.1718E+02 | 0.0000E+00 | 0.2030E+04 | 0xfffff00 |
| 0.1840E+02 | 0.0000E+00 | 0.2030E+04 | 0xfffff00 |
| 0.1962E+02 | 0.0000E+00 | 0.2030E+04 | 0xfffff00 |
| 0.2084E+02 | 0.0000E+00 | 0.2030E+04 | 0xfffff00 |
| 0.2206E+02 | 0.0000E+00 | 0.2030E+04 | 0xfffff00 |
| 0.2328E+02 | 0.0000E+00 | 0.2030E+04 | 0xfffff00 |
| 0.2450E+02 | 0.0000E+00 | 0.2030E+04 | 0xfffff00 |
| 0.2572E+02 | 0.0000E+00 | 0.2030E+04 | 0xfffff00 |
| 0.2693E+02 | 0.4852E-05 | 0.2030E+04 | 0xfffff00 |
| 0.2815E+02 | 0.1161E-04 | 0.2030E+04 | 0xfffff00 |
| 0.2937E+02 | 0.5551E-04 | 0.2030E+04 | 0xfffff00 |
| 0.3059E+02 | 0.2405E-03 | 0.2030E+04 | 0xfffff00 |
| 0.3181E+02 | 0.6836E-03 | 0.2030E+04 | 0xfffff00 |
| 0.3303E+02 | 0.1785E-02 | 0.2030E+04 | 0xfffff00 |
| 0.3425E+02 | 0.3819E-02 | 0.2030E+04 | 0xfffff00 |
| 0.3547E+02 | 0.7287E-02 | 0.2030E+04 | 0xfffff00 |
| 0.3668E+02 | 0.1278E-01 | 0.2030E+04 | 0xfffff00 |
| 0.3790E+02 | 0.1971E-01 | 0.2030E+04 | 0xfffff00 |
| 0.3912E+02 | 0.2754E-01 | 0.2030E+04 | 0xfffff00 |
| 0.4034E+02 | 0.3640E-01 | 0.2030E+04 | 0xfffff00 |
| 0.4156E+02 | 0.4499E-01 | 0.2030E+04 | 0xfffff00 |
| 0.4278E+02 | 0.5207E-01 | 0.2030E+04 | 0xfffff00 |

V2\_Results\_baseline\_IEA\_accel.dat

|            |            |            |           |
|------------|------------|------------|-----------|
| 0.4400E+02 | 0.5747E-01 | 0.2030E+04 | 0xfffff00 |
| 0.4522E+02 | 0.6101E-01 | 0.2030E+04 | 0xfffff00 |
| 0.4643E+02 | 0.6173E-01 | 0.2030E+04 | 0xfffff00 |
| 0.4765E+02 | 0.5947E-01 | 0.2030E+04 | 0xfffff00 |
| 0.4887E+02 | 0.5604E-01 | 0.2030E+04 | 0xfffff00 |
| 0.5009E+02 | 0.5164E-01 | 0.2030E+04 | 0xfffff00 |
| 0.5131E+02 | 0.4581E-01 | 0.2030E+04 | 0xfffff00 |
| 0.5253E+02 | 0.4009E-01 | 0.2030E+04 | 0xfffff00 |
| 0.5375E+02 | 0.3497E-01 | 0.2030E+04 | 0xfffff00 |
| 0.5497E+02 | 0.3006E-01 | 0.2030E+04 | 0xfffff00 |
| 0.5618E+02 | 0.2441E-01 | 0.2030E+04 | 0xfffff00 |
| 0.5740E+02 | 0.1932E-01 | 0.2030E+04 | 0xfffff00 |
| 0.5862E+02 | 0.1573E-01 | 0.2030E+04 | 0xfffff00 |
| 0.5984E+02 | 0.1276E-01 | 0.2030E+04 | 0xfffff00 |
| 0.6106E+02 | 0.1009E-01 | 0.2030E+04 | 0xfffff00 |
| 0.6228E+02 | 0.7736E-02 | 0.2030E+04 | 0xfffff00 |
| 0.6350E+02 | 0.5804E-02 | 0.2030E+04 | 0xfffff00 |
| 0.6472E+02 | 0.4567E-02 | 0.2030E+04 | 0xfffff00 |
| 0.6593E+02 | 0.3505E-02 | 0.2030E+04 | 0xfffff00 |
| 0.6715E+02 | 0.2618E-02 | 0.2030E+04 | 0xfffff00 |
| 0.6837E+02 | 0.2081E-02 | 0.2030E+04 | 0xfffff00 |
| 0.6959E+02 | 0.1562E-02 | 0.2030E+04 | 0xfffff00 |
| 0.7081E+02 | 0.1165E-02 | 0.2030E+04 | 0xfffff00 |
| 0.7203E+02 | 0.8535E-03 | 0.2030E+04 | 0xfffff00 |
| 0.7325E+02 | 0.6210E-03 | 0.2030E+04 | 0xfffff00 |
| 0.7447E+02 | 0.4986E-03 | 0.2030E+04 | 0xfffff00 |
| 0.7568E+02 | 0.3919E-03 | 0.2030E+04 | 0xfffff00 |
| 0.7690E+02 | 0.2964E-03 | 0.2030E+04 | 0xfffff00 |
| 0.7812E+02 | 0.2209E-03 | 0.2030E+04 | 0xfffff00 |
| 0.7934E+02 | 0.1776E-03 | 0.2030E+04 | 0xfffff00 |
| 0.8056E+02 | 0.1143E-03 | 0.2030E+04 | 0xfffff00 |
| 0.8178E+02 | 0.7622E-04 | 0.2030E+04 | 0xfffff00 |
| 0.8300E+02 | 0.7019E-04 | 0.2030E+04 | 0xfffff00 |
| 0.8422E+02 | 0.4480E-04 | 0.2030E+04 | 0xfffff00 |
| 0.8543E+02 | 0.2457E-04 | 0.2030E+04 | 0xfffff00 |
| 0.8665E+02 | 0.1959E-04 | 0.2030E+04 | 0xfffff00 |

V2\_Results\_baseline\_IEA\_accel.dat

|            |            |            |           |
|------------|------------|------------|-----------|
| 0.8787E+02 | 0.1417E-04 | 0.2030E+04 | 0xfffff00 |
| 0.8909E+02 | 0.1386E-04 | 0.2030E+04 | 0xfffff00 |
| 0.9031E+02 | 0.2540E-04 | 0.2030E+04 | 0xfffff00 |
| 0.9153E+02 | 0.1817E-04 | 0.2030E+04 | 0xfffff00 |
| 0.9275E+02 | 0.2399E-05 | 0.2030E+04 | 0xfffff00 |
| 0.9397E+02 | 0.0000E+00 | 0.2030E+04 | 0xfffff00 |
| 0.9518E+02 | 0.3761E-05 | 0.2030E+04 | 0xfffff00 |
| 0.9640E+02 | 0.5617E-05 | 0.2030E+04 | 0xfffff00 |
| 0.9762E+02 | 0.4565E-05 | 0.2030E+04 | 0xfffff00 |
|            |            |            |           |
| 0.4351E+02 | 0.1212E-04 | 0.2040E+04 | 0x00ffff  |
| 0.4451E+02 | 0.2151E-04 | 0.2040E+04 | 0x00ffff  |
| 0.4551E+02 | 0.3969E-04 | 0.2040E+04 | 0x00ffff  |
| 0.4652E+02 | 0.1230E-03 | 0.2040E+04 | 0x00ffff  |
| 0.4752E+02 | 0.2803E-03 | 0.2040E+04 | 0x00ffff  |
| 0.4852E+02 | 0.5638E-03 | 0.2040E+04 | 0x00ffff  |
| 0.4952E+02 | 0.1069E-02 | 0.2040E+04 | 0x00ffff  |
| 0.5052E+02 | 0.1911E-02 | 0.2040E+04 | 0x00ffff  |
| 0.5152E+02 | 0.3277E-02 | 0.2040E+04 | 0x00ffff  |
| 0.5252E+02 | 0.5368E-02 | 0.2040E+04 | 0x00ffff  |
| 0.5352E+02 | 0.8091E-02 | 0.2040E+04 | 0x00ffff  |
| 0.5452E+02 | 0.1146E-01 | 0.2040E+04 | 0x00ffff  |
| 0.5553E+02 | 0.1556E-01 | 0.2040E+04 | 0x00ffff  |
| 0.5653E+02 | 0.2060E-01 | 0.2040E+04 | 0x00ffff  |
| 0.5753E+02 | 0.2593E-01 | 0.2040E+04 | 0x00ffff  |
| 0.5853E+02 | 0.3140E-01 | 0.2040E+04 | 0x00ffff  |
| 0.5953E+02 | 0.3661E-01 | 0.2040E+04 | 0x00ffff  |
| 0.6053E+02 | 0.4132E-01 | 0.2040E+04 | 0x00ffff  |
| 0.6153E+02 | 0.4524E-01 | 0.2040E+04 | 0x00ffff  |
| 0.6253E+02 | 0.4892E-01 | 0.2040E+04 | 0x00ffff  |
| 0.6353E+02 | 0.5185E-01 | 0.2040E+04 | 0x00ffff  |
| 0.6453E+02 | 0.5350E-01 | 0.2040E+04 | 0x00ffff  |
| 0.6554E+02 | 0.5341E-01 | 0.2040E+04 | 0x00ffff  |
| 0.6654E+02 | 0.5208E-01 | 0.2040E+04 | 0x00ffff  |
| 0.6754E+02 | 0.5046E-01 | 0.2040E+04 | 0x00ffff  |
| 0.6854E+02 | 0.4860E-01 | 0.2040E+04 | 0x00ffff  |

V2\_Results\_baseline\_IEA\_accel.dat

|            |            |            |          |
|------------|------------|------------|----------|
| 0.6954E+02 | 0.4618E-01 | 0.2040E+04 | 0x00ffff |
| 0.7054E+02 | 0.4269E-01 | 0.2040E+04 | 0x00ffff |
| 0.7154E+02 | 0.3900E-01 | 0.2040E+04 | 0x00ffff |
| 0.7254E+02 | 0.3546E-01 | 0.2040E+04 | 0x00ffff |
| 0.7354E+02 | 0.3209E-01 | 0.2040E+04 | 0x00ffff |
| 0.7455E+02 | 0.2898E-01 | 0.2040E+04 | 0x00ffff |
| 0.7555E+02 | 0.2558E-01 | 0.2040E+04 | 0x00ffff |
| 0.7655E+02 | 0.2219E-01 | 0.2040E+04 | 0x00ffff |
| 0.7755E+02 | 0.1904E-01 | 0.2040E+04 | 0x00ffff |
| 0.7855E+02 | 0.1639E-01 | 0.2040E+04 | 0x00ffff |
| 0.7955E+02 | 0.1395E-01 | 0.2040E+04 | 0x00ffff |
| 0.8055E+02 | 0.1206E-01 | 0.2040E+04 | 0x00ffff |
| 0.8155E+02 | 0.1038E-01 | 0.2040E+04 | 0x00ffff |
| 0.8255E+02 | 0.8681E-02 | 0.2040E+04 | 0x00ffff |
| 0.8356E+02 | 0.7127E-02 | 0.2040E+04 | 0x00ffff |
| 0.8456E+02 | 0.5862E-02 | 0.2040E+04 | 0x00ffff |
| 0.8556E+02 | 0.4801E-02 | 0.2040E+04 | 0x00ffff |
| 0.8656E+02 | 0.3878E-02 | 0.2040E+04 | 0x00ffff |
| 0.8756E+02 | 0.3234E-02 | 0.2040E+04 | 0x00ffff |
| 0.8856E+02 | 0.2659E-02 | 0.2040E+04 | 0x00ffff |
| 0.8956E+02 | 0.2175E-02 | 0.2040E+04 | 0x00ffff |
| 0.9056E+02 | 0.1706E-02 | 0.2040E+04 | 0x00ffff |
| 0.9156E+02 | 0.1442E-02 | 0.2040E+04 | 0x00ffff |
| 0.9257E+02 | 0.1203E-02 | 0.2040E+04 | 0x00ffff |
| 0.9357E+02 | 0.9475E-03 | 0.2040E+04 | 0x00ffff |
| 0.9457E+02 | 0.6768E-03 | 0.2040E+04 | 0x00ffff |
| 0.9557E+02 | 0.5324E-03 | 0.2040E+04 | 0x00ffff |
| 0.9657E+02 | 0.4387E-03 | 0.2040E+04 | 0x00ffff |
| 0.9757E+02 | 0.3583E-03 | 0.2040E+04 | 0x00ffff |
| 0.9857E+02 | 0.2859E-03 | 0.2040E+04 | 0x00ffff |
| 0.9957E+02 | 0.2395E-03 | 0.2040E+04 | 0x00ffff |
| 0.1006E+03 | 0.2078E-03 | 0.2040E+04 | 0x00ffff |
| 0.1016E+03 | 0.1632E-03 | 0.2040E+04 | 0x00ffff |
| 0.1026E+03 | 0.1092E-03 | 0.2040E+04 | 0x00ffff |
| 0.1036E+03 | 0.7837E-04 | 0.2040E+04 | 0x00ffff |
| 0.1046E+03 | 0.7264E-04 | 0.2040E+04 | 0x00ffff |



V2\_Results\_baseline\_IEA\_accel.dat

|            |            |            |          |
|------------|------------|------------|----------|
| 0.1056E+03 | 0.8245E-04 | 0.2040E+04 | 0x00ffff |
| 0.1066E+03 | 0.7031E-04 | 0.2040E+04 | 0x00ffff |
| 0.1076E+03 | 0.5090E-04 | 0.2040E+04 | 0x00ffff |
| 0.1086E+03 | 0.2993E-04 | 0.2040E+04 | 0x00ffff |
| 0.1096E+03 | 0.2288E-04 | 0.2040E+04 | 0x00ffff |
| 0.1106E+03 | 0.1270E-04 | 0.2040E+04 | 0x00ffff |
| 0.1116E+03 | 0.8346E-05 | 0.2040E+04 | 0x00ffff |
| 0.1126E+03 | 0.9203E-05 | 0.2040E+04 | 0x00ffff |
| 0.1136E+03 | 0.1297E-04 | 0.2040E+04 | 0x00ffff |
| 0.1146E+03 | 0.1369E-04 | 0.2040E+04 | 0x00ffff |
| 0.1156E+03 | 0.1130E-04 | 0.2040E+04 | 0x00ffff |
| 0.1166E+03 | 0.4314E-05 | 0.2040E+04 | 0x00ffff |
| 0.1176E+03 | 0.6885E-06 | 0.2040E+04 | 0x00ffff |
| 0.1186E+03 | 0.0000E+00 | 0.2040E+04 | 0x00ffff |
| 0.1196E+03 | 0.0000E+00 | 0.2040E+04 | 0x00ffff |
| 0.1206E+03 | 0.0000E+00 | 0.2040E+04 | 0x00ffff |
| 0.1216E+03 | 0.0000E+00 | 0.2040E+04 | 0x00ffff |
| 0.1226E+03 | 0.2619E-05 | 0.2040E+04 | 0x00ffff |
| 0.1236E+03 | 0.4017E-05 | 0.2040E+04 | 0x00ffff |
|            |            |            |          |
| 0.2260E+02 | 0.2361E-04 | 0.2050E+04 | 0x0000ff |
| 0.2352E+02 | 0.7301E-04 | 0.2050E+04 | 0x0000ff |
| 0.2444E+02 | 0.1645E-03 | 0.2050E+04 | 0x0000ff |
| 0.2536E+02 | 0.3706E-03 | 0.2050E+04 | 0x0000ff |
| 0.2628E+02 | 0.7526E-03 | 0.2050E+04 | 0x0000ff |
| 0.2720E+02 | 0.1448E-02 | 0.2050E+04 | 0x0000ff |
| 0.2812E+02 | 0.2807E-02 | 0.2050E+04 | 0x0000ff |
| 0.2904E+02 | 0.4983E-02 | 0.2050E+04 | 0x0000ff |
| 0.2996E+02 | 0.7905E-02 | 0.2050E+04 | 0x0000ff |
| 0.3088E+02 | 0.1193E-01 | 0.2050E+04 | 0x0000ff |
| 0.3180E+02 | 0.1709E-01 | 0.2050E+04 | 0x0000ff |
| 0.3272E+02 | 0.2305E-01 | 0.2050E+04 | 0x0000ff |
| 0.3364E+02 | 0.2949E-01 | 0.2050E+04 | 0x0000ff |
| 0.3456E+02 | 0.3637E-01 | 0.2050E+04 | 0x0000ff |
| 0.3548E+02 | 0.4275E-01 | 0.2050E+04 | 0x0000ff |
| 0.3639E+02 | 0.4870E-01 | 0.2050E+04 | 0x0000ff |

V2\_Results\_baseline\_IEA\_accel.dat

|            |            |            |          |
|------------|------------|------------|----------|
| 0.3731E+02 | 0.5375E-01 | 0.2050E+04 | 0x0000ff |
| 0.3823E+02 | 0.5708E-01 | 0.2050E+04 | 0x0000ff |
| 0.3915E+02 | 0.5927E-01 | 0.2050E+04 | 0x0000ff |
| 0.4007E+02 | 0.6081E-01 | 0.2050E+04 | 0x0000ff |
| 0.4099E+02 | 0.6119E-01 | 0.2050E+04 | 0x0000ff |
| 0.4191E+02 | 0.6019E-01 | 0.2050E+04 | 0x0000ff |
| 0.4283E+02 | 0.5808E-01 | 0.2050E+04 | 0x0000ff |
| 0.4375E+02 | 0.5486E-01 | 0.2050E+04 | 0x0000ff |
| 0.4467E+02 | 0.5070E-01 | 0.2050E+04 | 0x0000ff |
| 0.4559E+02 | 0.4610E-01 | 0.2050E+04 | 0x0000ff |
| 0.4651E+02 | 0.4187E-01 | 0.2050E+04 | 0x0000ff |
| 0.4743E+02 | 0.3755E-01 | 0.2050E+04 | 0x0000ff |
| 0.4835E+02 | 0.3309E-01 | 0.2050E+04 | 0x0000ff |
| 0.4927E+02 | 0.2888E-01 | 0.2050E+04 | 0x0000ff |
| 0.5019E+02 | 0.2548E-01 | 0.2050E+04 | 0x0000ff |
| 0.5110E+02 | 0.2193E-01 | 0.2050E+04 | 0x0000ff |
| 0.5202E+02 | 0.1848E-01 | 0.2050E+04 | 0x0000ff |
| 0.5294E+02 | 0.1556E-01 | 0.2050E+04 | 0x0000ff |
| 0.5386E+02 | 0.1311E-01 | 0.2050E+04 | 0x0000ff |
| 0.5478E+02 | 0.1118E-01 | 0.2050E+04 | 0x0000ff |
| 0.5570E+02 | 0.9342E-02 | 0.2050E+04 | 0x0000ff |
| 0.5662E+02 | 0.7536E-02 | 0.2050E+04 | 0x0000ff |
| 0.5754E+02 | 0.6036E-02 | 0.2050E+04 | 0x0000ff |
| 0.5846E+02 | 0.5089E-02 | 0.2050E+04 | 0x0000ff |
| 0.5938E+02 | 0.4312E-02 | 0.2050E+04 | 0x0000ff |
| 0.6030E+02 | 0.3503E-02 | 0.2050E+04 | 0x0000ff |
| 0.6122E+02 | 0.2757E-02 | 0.2050E+04 | 0x0000ff |
| 0.6214E+02 | 0.2199E-02 | 0.2050E+04 | 0x0000ff |
| 0.6306E+02 | 0.1812E-02 | 0.2050E+04 | 0x0000ff |
| 0.6398E+02 | 0.1535E-02 | 0.2050E+04 | 0x0000ff |
| 0.6489E+02 | 0.1246E-02 | 0.2050E+04 | 0x0000ff |
| 0.6581E+02 | 0.9549E-03 | 0.2050E+04 | 0x0000ff |
| 0.6673E+02 | 0.8172E-03 | 0.2050E+04 | 0x0000ff |
| 0.6765E+02 | 0.6967E-03 | 0.2050E+04 | 0x0000ff |
| 0.6857E+02 | 0.5267E-03 | 0.2050E+04 | 0x0000ff |
| 0.6949E+02 | 0.3869E-03 | 0.2050E+04 | 0x0000ff |

# V2\_Results\_baseline\_IEA\_accel.dat

|            |            |            |          |
|------------|------------|------------|----------|
| 0.7041E+02 | 0.3338E-03 | 0.2050E+04 | 0x0000ff |
| 0.7133E+02 | 0.2876E-03 | 0.2050E+04 | 0x0000ff |
| 0.7225E+02 | 0.2430E-03 | 0.2050E+04 | 0x0000ff |
| 0.7317E+02 | 0.1772E-03 | 0.2050E+04 | 0x0000ff |
| 0.7409E+02 | 0.1406E-03 | 0.2050E+04 | 0x0000ff |
| 0.7501E+02 | 0.1230E-03 | 0.2050E+04 | 0x0000ff |
| 0.7593E+02 | 0.1086E-03 | 0.2050E+04 | 0x0000ff |
| 0.7685E+02 | 0.7938E-04 | 0.2050E+04 | 0x0000ff |
| 0.7777E+02 | 0.6192E-04 | 0.2050E+04 | 0x0000ff |
| 0.7869E+02 | 0.5226E-04 | 0.2050E+04 | 0x0000ff |
| 0.7960E+02 | 0.4458E-04 | 0.2050E+04 | 0x0000ff |
| 0.8052E+02 | 0.3385E-04 | 0.2050E+04 | 0x0000ff |
| 0.8144E+02 | 0.2822E-04 | 0.2050E+04 | 0x0000ff |
| 0.8236E+02 | 0.3648E-04 | 0.2050E+04 | 0x0000ff |
| 0.8328E+02 | 0.3698E-04 | 0.2050E+04 | 0x0000ff |
| 0.8420E+02 | 0.2714E-04 | 0.2050E+04 | 0x0000ff |
| 0.8512E+02 | 0.1467E-04 | 0.2050E+04 | 0x0000ff |
| 0.8604E+02 | 0.5624E-05 | 0.2050E+04 | 0x0000ff |
| 0.8696E+02 | 0.1811E-05 | 0.2050E+04 | 0x0000ff |
| 0.8788E+02 | 0.4360E-05 | 0.2050E+04 | 0x0000ff |
| 0.8880E+02 | 0.1827E-04 | 0.2050E+04 | 0x0000ff |
| 0.8972E+02 | 0.2520E-04 | 0.2050E+04 | 0x0000ff |
| 0.9064E+02 | 0.1805E-04 | 0.2050E+04 | 0x0000ff |
| 0.9156E+02 | 0.8063E-05 | 0.2050E+04 | 0x0000ff |
| 0.9248E+02 | 0.2949E-05 | 0.2050E+04 | 0x0000ff |
| 0.9339E+02 | 0.2281E-05 | 0.2050E+04 | 0x0000ff |
| 0.9431E+02 | 0.4488E-05 | 0.2050E+04 | 0x0000ff |
| 0.9523E+02 | 0.6627E-05 | 0.2050E+04 | 0x0000ff |
| 0.9615E+02 | 0.4774E-05 | 0.2050E+04 | 0x0000ff |

# \*\*\*\*\* Standardised \*\*\*\*\*

|            |             |            |             |            |             |            |             |
|------------|-------------|------------|-------------|------------|-------------|------------|-------------|
| -200       | -0.2971E+01 | 0.1201E-03 | -0.2918E+01 | 0.7450E-04 | -0.3072E+01 | 0.9522E-04 | -0.2887E+01 |
| 0.1629E-03 |             |            |             |            |             |            |             |
| -195       | -0.2838E+01 | 0.2870E-03 | -0.2792E+01 | 0.2215E-03 | -0.2945E+01 | 0.1689E-03 | -0.2754E+01 |
| 0.5037E-03 |             |            |             |            |             |            |             |

V2\_Results\_baseline\_IEA\_accel.dat

|            |             |            |             |            |             |            |             |
|------------|-------------|------------|-------------|------------|-------------|------------|-------------|
| -190       | -0.2706E+01 | 0.5558E-03 | -0.2666E+01 | 0.7295E-03 | -0.2818E+01 | 0.3117E-03 | -0.2621E+01 |
| 0.1135E-02 |             |            |             |            |             |            |             |
| -185       | -0.2573E+01 | 0.1338E-02 | -0.2540E+01 | 0.1872E-02 | -0.2690E+01 | 0.9663E-03 | -0.2487E+01 |
| 0.2556E-02 |             |            |             |            |             |            |             |
| -180       | -0.2440E+01 | 0.3239E-02 | -0.2414E+01 | 0.3995E-02 | -0.2563E+01 | 0.2201E-02 | -0.2354E+01 |
| 0.5192E-02 |             |            |             |            |             |            |             |
| -175       | -0.2307E+01 | 0.6987E-02 | -0.2287E+01 | 0.7754E-02 | -0.2435E+01 | 0.4428E-02 | -0.2221E+01 |
| 0.9990E-02 |             |            |             |            |             |            |             |
| -170       | -0.2174E+01 | 0.1292E-01 | -0.2161E+01 | 0.1516E-01 | -0.2308E+01 | 0.8393E-02 | -0.2088E+01 |
| 0.1937E-01 |             |            |             |            |             |            |             |
| -165       | -0.2042E+01 | 0.2276E-01 | -0.2035E+01 | 0.2561E-01 | -0.2180E+01 | 0.1501E-01 | -0.1954E+01 |
| 0.3438E-01 |             |            |             |            |             |            |             |
| -160       | -0.1909E+01 | 0.4005E-01 | -0.1909E+01 | 0.4132E-01 | -0.2053E+01 | 0.2574E-01 | -0.1821E+01 |
| 0.5454E-01 |             |            |             |            |             |            |             |
| -155       | -0.1776E+01 | 0.6401E-01 | -0.1783E+01 | 0.6280E-01 | -0.1925E+01 | 0.4216E-01 | -0.1688E+01 |
| 0.8231E-01 |             |            |             |            |             |            |             |
| -150       | -0.1643E+01 | 0.9409E-01 | -0.1657E+01 | 0.9261E-01 | -0.1798E+01 | 0.6354E-01 | -0.1554E+01 |
| 0.1179E+00 |             |            |             |            |             |            |             |
| -145       | -0.1510E+01 | 0.1294E+00 | -0.1531E+01 | 0.1265E+00 | -0.1670E+01 | 0.9004E-01 | -0.1421E+01 |
| 0.1590E+00 |             |            |             |            |             |            |             |
| -140       | -0.1378E+01 | 0.1703E+00 | -0.1405E+01 | 0.1637E+00 | -0.1543E+01 | 0.1222E+00 | -0.1288E+01 |
| 0.2034E+00 |             |            |             |            |             |            |             |
| -135       | -0.1245E+01 | 0.2143E+00 | -0.1279E+01 | 0.2037E+00 | -0.1415E+01 | 0.1618E+00 | -0.1155E+01 |
| 0.2509E+00 |             |            |             |            |             |            |             |
| -130       | -0.1112E+01 | 0.2598E+00 | -0.1153E+01 | 0.2480E+00 | -0.1288E+01 | 0.2037E+00 | -0.1021E+01 |
| 0.2949E+00 |             |            |             |            |             |            |             |
| -125       | -0.9793E+00 | 0.3052E+00 | -0.1027E+01 | 0.2913E+00 | -0.1160E+01 | 0.2466E+00 | -0.8882E+00 |
| 0.3360E+00 |             |            |             |            |             |            |             |
| -120       | -0.8465E+00 | 0.3467E+00 | -0.9004E+00 | 0.3305E+00 | -0.1033E+01 | 0.2875E+00 | -0.7549E+00 |
| 0.3708E+00 |             |            |             |            |             |            |             |
| -115       | -0.7137E+00 | 0.3817E+00 | -0.7744E+00 | 0.3628E+00 | -0.9055E+00 | 0.3245E+00 | -0.6217E+00 |
| 0.3938E+00 |             |            |             |            |             |            |             |
| -110       | -0.5809E+00 | 0.4079E+00 | -0.6483E+00 | 0.3898E+00 | -0.7781E+00 | 0.3553E+00 | -0.4884E+00 |
| 0.4089E+00 |             |            |             |            |             |            |             |
| -105       | -0.4481E+00 | 0.4216E+00 | -0.5222E+00 | 0.4102E+00 | -0.6506E+00 | 0.3842E+00 | -0.3552E+00 |
| 0.4196E+00 |             |            |             |            |             |            |             |

# V2\_Results\_baseline IEA\_accel.dat

|            |             |            |             |            |             |            |             |
|------------|-------------|------------|-------------|------------|-------------|------------|-------------|
| -100       | -0.3153E+00 | 0.4281E+00 | -0.3961E+00 | 0.4242E+00 | -0.5231E+00 | 0.4072E+00 | -0.2219E+00 |
| 0.4222E+00 |             |            |             |            |             |            |             |
| -95        | -0.1825E+00 | 0.4255E+00 | -0.2700E+00 | 0.4259E+00 | -0.3957E+00 | 0.4201E+00 | -0.8866E-01 |
| 0.4152E+00 |             |            |             |            |             |            |             |
| -90        | -0.4975E-01 | 0.4132E+00 | -0.1439E+00 | 0.4169E+00 | -0.2682E+00 | 0.4195E+00 | 0.4459E-01  |
| 0.4007E+00 |             |            |             |            |             |            |             |
| -85        | 0.8304E-01  | 0.3944E+00 | -0.1782E-01 | 0.4010E+00 | -0.1407E+00 | 0.4090E+00 | 0.1778E+00  |
| 0.3785E+00 |             |            |             |            |             |            |             |
| -80        | 0.2158E+00  | 0.3713E+00 | 0.1083E+00  | 0.3845E+00 | -0.1328E-01 | 0.3963E+00 | 0.3111E+00  |
| 0.3498E+00 |             |            |             |            |             |            |             |
| -75        | 0.3486E+00  | 0.3413E+00 | 0.2344E+00  | 0.3630E+00 | 0.1142E+00  | 0.3817E+00 | 0.4444E+00  |
| 0.3180E+00 |             |            |             |            |             |            |             |
| -70        | 0.4814E+00  | 0.3090E+00 | 0.3604E+00  | 0.3357E+00 | 0.2417E+00  | 0.3627E+00 | 0.5776E+00  |
| 0.2889E+00 |             |            |             |            |             |            |             |
| -65        | 0.6142E+00  | 0.2793E+00 | 0.4865E+00  | 0.3068E+00 | 0.3691E+00  | 0.3353E+00 | 0.7109E+00  |
| 0.2590E+00 |             |            |             |            |             |            |             |
| -60        | 0.7470E+00  | 0.2480E+00 | 0.6126E+00  | 0.2786E+00 | 0.4966E+00  | 0.3063E+00 | 0.8441E+00  |
| 0.2283E+00 |             |            |             |            |             |            |             |
| -55        | 0.8798E+00  | 0.2170E+00 | 0.7387E+00  | 0.2529E+00 | 0.6241E+00  | 0.2785E+00 | 0.9774E+00  |
| 0.1993E+00 |             |            |             |            |             |            |             |
| -50        | 0.1013E+01  | 0.1892E+00 | 0.8648E+00  | 0.2287E+00 | 0.7515E+00  | 0.2521E+00 | 0.1111E+01  |
| 0.1758E+00 |             |            |             |            |             |            |             |
| -45        | 0.1145E+01  | 0.1657E+00 | 0.9909E+00  | 0.2043E+00 | 0.8790E+00  | 0.2276E+00 | 0.1244E+01  |
| 0.1513E+00 |             |            |             |            |             |            |             |
| -40        | 0.1278E+01  | 0.1440E+00 | 0.1117E+01  | 0.1766E+00 | 0.1006E+01  | 0.2009E+00 | 0.1377E+01  |
| 0.1275E+00 |             |            |             |            |             |            |             |
| -35        | 0.1411E+01  | 0.1220E+00 | 0.1243E+01  | 0.1493E+00 | 0.1134E+01  | 0.1743E+00 | 0.1510E+01  |
| 0.1073E+00 |             |            |             |            |             |            |             |
| -30        | 0.1544E+01  | 0.1026E+00 | 0.1369E+01  | 0.1276E+00 | 0.1261E+01  | 0.1495E+00 | 0.1644E+01  |
| 0.9043E-01 |             |            |             |            |             |            |             |
| -25        | 0.1677E+01  | 0.8729E-01 | 0.1495E+01  | 0.1099E+00 | 0.1389E+01  | 0.1287E+00 | 0.1777E+01  |
| 0.7714E-01 |             |            |             |            |             |            |             |
| -20        | 0.1809E+01  | 0.7451E-01 | 0.1621E+01  | 0.9553E-01 | 0.1516E+01  | 0.1095E+00 | 0.1910E+01  |
| 0.6446E-01 |             |            |             |            |             |            |             |
| -15        | 0.1942E+01  | 0.6175E-01 | 0.1747E+01  | 0.8089E-01 | 0.1644E+01  | 0.9474E-01 | 0.2043E+01  |
| 0.5199E-01 |             |            |             |            |             |            |             |

| V2_Results_baseline_IEA_accel.dat |            |            |            |            |            |            |            |
|-----------------------------------|------------|------------|------------|------------|------------|------------|------------|
| -10                               | 0.2075E+01 | 0.5075E-01 | 0.1874E+01 | 0.6835E-01 | 0.1771E+01 | 0.8153E-01 | 0.2177E+01 |
| 0.4164E-01                        | -5         | 0.2208E+01 | 0.4071E-01 | 0.2000E+01 | 0.5647E-01 | 0.1899E+01 | 0.6818E-01 |
| 0.3511E-01                        | 0          | 0.2340E+01 | 0.3282E-01 | 0.2126E+01 | 0.4605E-01 | 0.2026E+01 | 0.5598E-01 |
| 0.2975E-01                        | 5          | 0.2473E+01 | 0.2703E-01 | 0.2252E+01 | 0.3790E-01 | 0.2154E+01 | 0.4604E-01 |
| 0.2417E-01                        | 10         | 0.2606E+01 | 0.2250E-01 | 0.2378E+01 | 0.3199E-01 | 0.2281E+01 | 0.3771E-01 |
| 0.1902E-01                        | 15         | 0.2739E+01 | 0.1834E-01 | 0.2504E+01 | 0.2680E-01 | 0.2409E+01 | 0.3046E-01 |
| 0.1517E-01                        | 20         | 0.2872E+01 | 0.1454E-01 | 0.2630E+01 | 0.2162E-01 | 0.2536E+01 | 0.2540E-01 |
| 0.1250E-01                        | 25         | 0.3004E+01 | 0.1166E-01 | 0.2756E+01 | 0.1774E-01 | 0.2664E+01 | 0.2089E-01 |
| 0.1059E-01                        | 30         | 0.3137E+01 | 0.1009E-01 | 0.2882E+01 | 0.1515E-01 | 0.2791E+01 | 0.1708E-01 |
| 0.8595E-02                        | 35         | 0.3270E+01 | 0.8286E-02 | 0.3008E+01 | 0.1249E-01 | 0.2918E+01 | 0.1339E-01 |
| 0.6588E-02                        | 40         | 0.3403E+01 | 0.6416E-02 | 0.3134E+01 | 0.1013E-01 | 0.3046E+01 | 0.1133E-01 |
| 0.5638E-02                        | 45         | 0.3536E+01 | 0.4906E-02 | 0.3260E+01 | 0.8244E-02 | 0.3173E+01 | 0.9444E-02 |
| 0.4807E-02                        | 50         | 0.3668E+01 | 0.4235E-02 | 0.3387E+01 | 0.6641E-02 | 0.3301E+01 | 0.7442E-02 |
| 0.3634E-02                        | 55         | 0.3801E+01 | 0.3637E-02 | 0.3513E+01 | 0.5259E-02 | 0.3428E+01 | 0.5315E-02 |
| 0.2670E-02                        | 60         | 0.3934E+01 | 0.3091E-02 | 0.3639E+01 | 0.4245E-02 | 0.3556E+01 | 0.4181E-02 |
| 0.2303E-02                        | 65         | 0.4067E+01 | 0.2611E-02 | 0.3765E+01 | 0.3667E-02 | 0.3683E+01 | 0.3445E-02 |
| 0.1984E-02                        | 70         | 0.4199E+01 | 0.2074E-02 | 0.3891E+01 | 0.3052E-02 | 0.3811E+01 | 0.2814E-02 |
| 0.1677E-02                        | 75         | 0.4332E+01 | 0.1638E-02 | 0.4017E+01 | 0.2528E-02 | 0.3938E+01 | 0.2245E-02 |
| 0.1223E-02                        |            |            |            |            |            |            |            |

| V2_Results_baseline_IEA_accel.dat |            |            |            |            |            |            |            |
|-----------------------------------|------------|------------|------------|------------|------------|------------|------------|
| 80                                | 0.4465E+01 | 0.1520E-02 | 0.4143E+01 | 0.2078E-02 | 0.4066E+01 | 0.1881E-02 | 0.4575E+01 |
| 0.9699E-03                        |            |            |            |            |            |            |            |
| 85                                | 0.4598E+01 | 0.1311E-02 | 0.4269E+01 | 0.1691E-02 | 0.4193E+01 | 0.1632E-02 | 0.4709E+01 |
| 0.8487E-03                        |            |            |            |            |            |            |            |
| 90                                | 0.4731E+01 | 0.9712E-03 | 0.4395E+01 | 0.1420E-02 | 0.4321E+01 | 0.1282E-02 | 0.4842E+01 |
| 0.7495E-03                        |            |            |            |            |            |            |            |
| 95                                | 0.4863E+01 | 0.6128E-03 | 0.4521E+01 | 0.1201E-02 | 0.4448E+01 | 0.8578E-03 | 0.4975E+01 |
| 0.5476E-03                        |            |            |            |            |            |            |            |
| 100                               | 0.4996E+01 | 0.4714E-03 | 0.4647E+01 | 0.8875E-03 | 0.4576E+01 | 0.6155E-03 | 0.5108E+01 |
| 0.4272E-03                        |            |            |            |            |            |            |            |
| 105                               | 0.5129E+01 | 0.4099E-03 | 0.4774E+01 | 0.6400E-03 | 0.4703E+01 | 0.5705E-03 | 0.5242E+01 |
| 0.3605E-03                        |            |            |            |            |            |            |            |
| 110                               | 0.5262E+01 | 0.4045E-03 | 0.4900E+01 | 0.4997E-03 | 0.4830E+01 | 0.6475E-03 | 0.5375E+01 |
| 0.3075E-03                        |            |            |            |            |            |            |            |
| 115                               | 0.5395E+01 | 0.4006E-03 | 0.5026E+01 | 0.4970E-03 | 0.4958E+01 | 0.5522E-03 | 0.5508E+01 |
| 0.2335E-03                        |            |            |            |            |            |            |            |
| 120                               | 0.5527E+01 | 0.3488E-03 | 0.5152E+01 | 0.3805E-03 | 0.5085E+01 | 0.3998E-03 | 0.5641E+01 |
| 0.1947E-03                        |            |            |            |            |            |            |            |
| 125                               | 0.5660E+01 | 0.3298E-03 | 0.5278E+01 | 0.2731E-03 | 0.5213E+01 | 0.2351E-03 | 0.5775E+01 |
| 0.2517E-03                        |            |            |            |            |            |            |            |
| 130                               | 0.5793E+01 | 0.3151E-03 | 0.5404E+01 | 0.1708E-03 | 0.5340E+01 | 0.1797E-03 | 0.5908E+01 |
| 0.2551E-03                        |            |            |            |            |            |            |            |
| 135                               | 0.5926E+01 | 0.2664E-03 | 0.5530E+01 | 0.1434E-03 | 0.5468E+01 | 0.9976E-04 | 0.6041E+01 |
| 0.1872E-03                        |            |            |            |            |            |            |            |
| 140                               | 0.6059E+01 | 0.1192E-03 | 0.5656E+01 | 0.1122E-03 | 0.5595E+01 | 0.6555E-04 | 0.6174E+01 |
| 0.1012E-03                        |            |            |            |            |            |            |            |
| 145                               | 0.6191E+01 | 0.9277E-04 | 0.5782E+01 | 0.9013E-04 | 0.5723E+01 | 0.7228E-04 | 0.6308E+01 |
| 0.3880E-04                        |            |            |            |            |            |            |            |
| 150                               | 0.6324E+01 | 0.1109E-03 | 0.5908E+01 | 0.9547E-04 | 0.5850E+01 | 0.1018E-03 | 0.6441E+01 |
| 0.1250E-04                        |            |            |            |            |            |            |            |
| 155                               | 0.6457E+01 | 0.9393E-04 | 0.6034E+01 | 0.1430E-03 | 0.5978E+01 | 0.1075E-03 | 0.6574E+01 |
| 0.3008E-04                        |            |            |            |            |            |            |            |
| 160                               | 0.6590E+01 | 0.3967E-04 | 0.6161E+01 | 0.1784E-03 | 0.6105E+01 | 0.8874E-04 | 0.6707E+01 |
| 0.1260E-03                        |            |            |            |            |            |            |            |
| 165                               | 0.6722E+01 | 0.3738E-04 | 0.6287E+01 | 0.1203E-03 | 0.6233E+01 | 0.3388E-04 | 0.6841E+01 |
| 0.1739E-03                        |            |            |            |            |            |            |            |

```

                                V2_Results_baseline_IEA_accel.dat
170  0.6855E+01  0.3089E-04  0.6413E+01  0.3684E-04  0.6360E+01  0.5407E-05  0.6974E+01
0.1246E-03
175  0.6988E+01  0.8169E-04  0.6539E+01  0.0000E+00  0.6488E+01  0.0000E+00  0.7107E+01
0.5563E-04
180  0.7121E+01  0.9537E-04  0.6665E+01  0.0000E+00  0.6615E+01  0.0000E+00  0.7240E+01
0.2034E-04
185  0.7254E+01  0.9930E-04  0.6791E+01  0.2349E-04  0.6742E+01  0.0000E+00  0.7374E+01
0.1574E-04
190  0.7386E+01  0.6492E-04  0.6917E+01  0.3164E-04  0.6870E+01  0.0000E+00  0.7507E+01
0.3096E-04
195  0.7519E+01  0.7311E-04  0.7043E+01  0.4267E-04  0.6997E+01  0.2057E-04  0.7640E+01
0.4572E-04
200  0.7652E+01  0.4151E-04  0.7169E+01  0.3157E-04  0.7125E+01  0.3155E-04  0.7773E+01
0.3294E-04

```

```

#      *****      adaptados para un plot en 3D con gnuplot      *****

```

```

-0.2971E+01  0.1201E-03  0.2020E+04
-0.2838E+01  0.2870E-03  0.2020E+04
-0.2706E+01  0.5558E-03  0.2020E+04
-0.2573E+01  0.1338E-02  0.2020E+04
-0.2440E+01  0.3239E-02  0.2020E+04
-0.2307E+01  0.6987E-02  0.2020E+04
-0.2174E+01  0.1292E-01  0.2020E+04
-0.2042E+01  0.2276E-01  0.2020E+04
-0.1909E+01  0.4005E-01  0.2020E+04
-0.1776E+01  0.6401E-01  0.2020E+04
-0.1643E+01  0.9409E-01  0.2020E+04
-0.1510E+01  0.1294E+00  0.2020E+04
-0.1378E+01  0.1703E+00  0.2020E+04
-0.1245E+01  0.2143E+00  0.2020E+04
-0.1112E+01  0.2598E+00  0.2020E+04
-0.9793E+00  0.3052E+00  0.2020E+04
-0.8465E+00  0.3467E+00  0.2020E+04
-0.7137E+00  0.3817E+00  0.2020E+04
-0.5809E+00  0.4079E+00  0.2020E+04

```



V2\_Results\_baseline\_IEA\_accel.dat

|             |            |            |
|-------------|------------|------------|
| -0.4481E+00 | 0.4216E+00 | 0.2020E+04 |
| -0.3153E+00 | 0.4281E+00 | 0.2020E+04 |
| -0.1825E+00 | 0.4255E+00 | 0.2020E+04 |
| -0.4975E-01 | 0.4132E+00 | 0.2020E+04 |
| 0.8304E-01  | 0.3944E+00 | 0.2020E+04 |
| 0.2158E+00  | 0.3713E+00 | 0.2020E+04 |
| 0.3486E+00  | 0.3413E+00 | 0.2020E+04 |
| 0.4814E+00  | 0.3090E+00 | 0.2020E+04 |
| 0.6142E+00  | 0.2793E+00 | 0.2020E+04 |
| 0.7470E+00  | 0.2480E+00 | 0.2020E+04 |
| 0.8798E+00  | 0.2170E+00 | 0.2020E+04 |
| 0.1013E+01  | 0.1892E+00 | 0.2020E+04 |
| 0.1145E+01  | 0.1657E+00 | 0.2020E+04 |
| 0.1278E+01  | 0.1440E+00 | 0.2020E+04 |
| 0.1411E+01  | 0.1220E+00 | 0.2020E+04 |
| 0.1544E+01  | 0.1026E+00 | 0.2020E+04 |
| 0.1677E+01  | 0.8729E-01 | 0.2020E+04 |
| 0.1809E+01  | 0.7451E-01 | 0.2020E+04 |
| 0.1942E+01  | 0.6175E-01 | 0.2020E+04 |
| 0.2075E+01  | 0.5075E-01 | 0.2020E+04 |
| 0.2208E+01  | 0.4071E-01 | 0.2020E+04 |
| 0.2340E+01  | 0.3282E-01 | 0.2020E+04 |
| 0.2473E+01  | 0.2703E-01 | 0.2020E+04 |
| 0.2606E+01  | 0.2250E-01 | 0.2020E+04 |
| 0.2739E+01  | 0.1834E-01 | 0.2020E+04 |
| 0.2872E+01  | 0.1454E-01 | 0.2020E+04 |
| 0.3004E+01  | 0.1166E-01 | 0.2020E+04 |
| 0.3137E+01  | 0.1009E-01 | 0.2020E+04 |
| 0.3270E+01  | 0.8286E-02 | 0.2020E+04 |
| 0.3403E+01  | 0.6416E-02 | 0.2020E+04 |
| 0.3536E+01  | 0.4906E-02 | 0.2020E+04 |
| 0.3668E+01  | 0.4235E-02 | 0.2020E+04 |
| 0.3801E+01  | 0.3637E-02 | 0.2020E+04 |
| 0.3934E+01  | 0.3091E-02 | 0.2020E+04 |
| 0.4067E+01  | 0.2611E-02 | 0.2020E+04 |
| 0.4199E+01  | 0.2074E-02 | 0.2020E+04 |

V2\_Results\_baseline\_IEA\_accel.dat

|             |            |            |
|-------------|------------|------------|
| 0.4332E+01  | 0.1638E-02 | 0.2020E+04 |
| 0.4465E+01  | 0.1520E-02 | 0.2020E+04 |
| 0.4598E+01  | 0.1311E-02 | 0.2020E+04 |
| 0.4731E+01  | 0.9712E-03 | 0.2020E+04 |
| 0.4863E+01  | 0.6128E-03 | 0.2020E+04 |
| 0.4996E+01  | 0.4714E-03 | 0.2020E+04 |
| 0.5129E+01  | 0.4099E-03 | 0.2020E+04 |
| 0.5262E+01  | 0.4045E-03 | 0.2020E+04 |
| 0.5395E+01  | 0.4006E-03 | 0.2020E+04 |
| 0.5527E+01  | 0.3488E-03 | 0.2020E+04 |
| 0.5660E+01  | 0.3298E-03 | 0.2020E+04 |
| 0.5793E+01  | 0.3151E-03 | 0.2020E+04 |
| 0.5926E+01  | 0.2664E-03 | 0.2020E+04 |
| 0.6059E+01  | 0.1192E-03 | 0.2020E+04 |
| 0.6191E+01  | 0.9277E-04 | 0.2020E+04 |
| 0.6324E+01  | 0.1109E-03 | 0.2020E+04 |
| 0.6457E+01  | 0.9393E-04 | 0.2020E+04 |
| 0.6590E+01  | 0.3967E-04 | 0.2020E+04 |
| 0.6722E+01  | 0.3738E-04 | 0.2020E+04 |
| 0.6855E+01  | 0.3089E-04 | 0.2020E+04 |
| 0.6988E+01  | 0.8169E-04 | 0.2020E+04 |
| 0.7121E+01  | 0.9537E-04 | 0.2020E+04 |
| 0.7254E+01  | 0.9930E-04 | 0.2020E+04 |
| 0.7386E+01  | 0.6492E-04 | 0.2020E+04 |
| 0.7519E+01  | 0.7311E-04 | 0.2020E+04 |
| 0.7652E+01  | 0.4151E-04 | 0.2020E+04 |
|             |            |            |
| -0.2918E+01 | 0.7450E-04 | 0.2030E+04 |
| -0.2792E+01 | 0.2215E-03 | 0.2030E+04 |
| -0.2666E+01 | 0.7295E-03 | 0.2030E+04 |
| -0.2540E+01 | 0.1872E-02 | 0.2030E+04 |
| -0.2414E+01 | 0.3995E-02 | 0.2030E+04 |
| -0.2287E+01 | 0.7754E-02 | 0.2030E+04 |
| -0.2161E+01 | 0.1516E-01 | 0.2030E+04 |
| -0.2035E+01 | 0.2561E-01 | 0.2030E+04 |
| -0.1909E+01 | 0.4132E-01 | 0.2030E+04 |

V2\_Results\_baseline\_IEA\_accel.dat

|             |            |            |
|-------------|------------|------------|
| -0.1783E+01 | 0.6280E-01 | 0.2030E+04 |
| -0.1657E+01 | 0.9261E-01 | 0.2030E+04 |
| -0.1531E+01 | 0.1265E+00 | 0.2030E+04 |
| -0.1405E+01 | 0.1637E+00 | 0.2030E+04 |
| -0.1279E+01 | 0.2037E+00 | 0.2030E+04 |
| -0.1153E+01 | 0.2480E+00 | 0.2030E+04 |
| -0.1027E+01 | 0.2913E+00 | 0.2030E+04 |
| -0.9004E+00 | 0.3305E+00 | 0.2030E+04 |
| -0.7744E+00 | 0.3628E+00 | 0.2030E+04 |
| -0.6483E+00 | 0.3898E+00 | 0.2030E+04 |
| -0.5222E+00 | 0.4102E+00 | 0.2030E+04 |
| -0.3961E+00 | 0.4242E+00 | 0.2030E+04 |
| -0.2700E+00 | 0.4259E+00 | 0.2030E+04 |
| -0.1439E+00 | 0.4169E+00 | 0.2030E+04 |
| -0.1782E-01 | 0.4010E+00 | 0.2030E+04 |
| 0.1083E+00  | 0.3845E+00 | 0.2030E+04 |
| 0.2344E+00  | 0.3630E+00 | 0.2030E+04 |
| 0.3604E+00  | 0.3357E+00 | 0.2030E+04 |
| 0.4865E+00  | 0.3068E+00 | 0.2030E+04 |
| 0.6126E+00  | 0.2786E+00 | 0.2030E+04 |
| 0.7387E+00  | 0.2529E+00 | 0.2030E+04 |
| 0.8648E+00  | 0.2287E+00 | 0.2030E+04 |
| 0.9909E+00  | 0.2043E+00 | 0.2030E+04 |
| 0.1117E+01  | 0.1766E+00 | 0.2030E+04 |
| 0.1243E+01  | 0.1493E+00 | 0.2030E+04 |
| 0.1369E+01  | 0.1276E+00 | 0.2030E+04 |
| 0.1495E+01  | 0.1099E+00 | 0.2030E+04 |
| 0.1621E+01  | 0.9553E-01 | 0.2030E+04 |
| 0.1747E+01  | 0.8089E-01 | 0.2030E+04 |
| 0.1874E+01  | 0.6835E-01 | 0.2030E+04 |
| 0.2000E+01  | 0.5647E-01 | 0.2030E+04 |
| 0.2126E+01  | 0.4605E-01 | 0.2030E+04 |
| 0.2252E+01  | 0.3790E-01 | 0.2030E+04 |
| 0.2378E+01  | 0.3199E-01 | 0.2030E+04 |
| 0.2504E+01  | 0.2680E-01 | 0.2030E+04 |
| 0.2630E+01  | 0.2162E-01 | 0.2030E+04 |

V2\_Results\_baseline\_IEA\_accel.dat

|            |            |            |
|------------|------------|------------|
| 0.2756E+01 | 0.1774E-01 | 0.2030E+04 |
| 0.2882E+01 | 0.1515E-01 | 0.2030E+04 |
| 0.3008E+01 | 0.1249E-01 | 0.2030E+04 |
| 0.3134E+01 | 0.1013E-01 | 0.2030E+04 |
| 0.3260E+01 | 0.8244E-02 | 0.2030E+04 |
| 0.3387E+01 | 0.6641E-02 | 0.2030E+04 |
| 0.3513E+01 | 0.5259E-02 | 0.2030E+04 |
| 0.3639E+01 | 0.4245E-02 | 0.2030E+04 |
| 0.3765E+01 | 0.3667E-02 | 0.2030E+04 |
| 0.3891E+01 | 0.3052E-02 | 0.2030E+04 |
| 0.4017E+01 | 0.2528E-02 | 0.2030E+04 |
| 0.4143E+01 | 0.2078E-02 | 0.2030E+04 |
| 0.4269E+01 | 0.1691E-02 | 0.2030E+04 |
| 0.4395E+01 | 0.1420E-02 | 0.2030E+04 |
| 0.4521E+01 | 0.1201E-02 | 0.2030E+04 |
| 0.4647E+01 | 0.8875E-03 | 0.2030E+04 |
| 0.4774E+01 | 0.6400E-03 | 0.2030E+04 |
| 0.4900E+01 | 0.4997E-03 | 0.2030E+04 |
| 0.5026E+01 | 0.4970E-03 | 0.2030E+04 |
| 0.5152E+01 | 0.3805E-03 | 0.2030E+04 |
| 0.5278E+01 | 0.2731E-03 | 0.2030E+04 |
| 0.5404E+01 | 0.1708E-03 | 0.2030E+04 |
| 0.5530E+01 | 0.1434E-03 | 0.2030E+04 |
| 0.5656E+01 | 0.1122E-03 | 0.2030E+04 |
| 0.5782E+01 | 0.9013E-04 | 0.2030E+04 |
| 0.5908E+01 | 0.9547E-04 | 0.2030E+04 |
| 0.6034E+01 | 0.1430E-03 | 0.2030E+04 |
| 0.6161E+01 | 0.1784E-03 | 0.2030E+04 |
| 0.6287E+01 | 0.1203E-03 | 0.2030E+04 |
| 0.6413E+01 | 0.3684E-04 | 0.2030E+04 |
| 0.6539E+01 | 0.0000E+00 | 0.2030E+04 |
| 0.6665E+01 | 0.0000E+00 | 0.2030E+04 |
| 0.6791E+01 | 0.2349E-04 | 0.2030E+04 |
| 0.6917E+01 | 0.3164E-04 | 0.2030E+04 |
| 0.7043E+01 | 0.4267E-04 | 0.2030E+04 |
| 0.7169E+01 | 0.3157E-04 | 0.2030E+04 |

V2\_Results\_baseline\_IEA\_accel.dat

|             |            |            |
|-------------|------------|------------|
| -0.3072E+01 | 0.9522E-04 | 0.2040E+04 |
| -0.2945E+01 | 0.1689E-03 | 0.2040E+04 |
| -0.2818E+01 | 0.3117E-03 | 0.2040E+04 |
| -0.2690E+01 | 0.9663E-03 | 0.2040E+04 |
| -0.2563E+01 | 0.2201E-02 | 0.2040E+04 |
| -0.2435E+01 | 0.4428E-02 | 0.2040E+04 |
| -0.2308E+01 | 0.8393E-02 | 0.2040E+04 |
| -0.2180E+01 | 0.1501E-01 | 0.2040E+04 |
| -0.2053E+01 | 0.2574E-01 | 0.2040E+04 |
| -0.1925E+01 | 0.4216E-01 | 0.2040E+04 |
| -0.1798E+01 | 0.6354E-01 | 0.2040E+04 |
| -0.1670E+01 | 0.9004E-01 | 0.2040E+04 |
| -0.1543E+01 | 0.1222E+00 | 0.2040E+04 |
| -0.1415E+01 | 0.1618E+00 | 0.2040E+04 |
| -0.1288E+01 | 0.2037E+00 | 0.2040E+04 |
| -0.1160E+01 | 0.2466E+00 | 0.2040E+04 |
| -0.1033E+01 | 0.2875E+00 | 0.2040E+04 |
| -0.9055E+00 | 0.3245E+00 | 0.2040E+04 |
| -0.7781E+00 | 0.3553E+00 | 0.2040E+04 |
| -0.6506E+00 | 0.3842E+00 | 0.2040E+04 |
| -0.5231E+00 | 0.4072E+00 | 0.2040E+04 |
| -0.3957E+00 | 0.4201E+00 | 0.2040E+04 |
| -0.2682E+00 | 0.4195E+00 | 0.2040E+04 |
| -0.1407E+00 | 0.4090E+00 | 0.2040E+04 |
| -0.1328E-01 | 0.3963E+00 | 0.2040E+04 |
| 0.1142E+00  | 0.3817E+00 | 0.2040E+04 |
| 0.2417E+00  | 0.3627E+00 | 0.2040E+04 |
| 0.3691E+00  | 0.3353E+00 | 0.2040E+04 |
| 0.4966E+00  | 0.3063E+00 | 0.2040E+04 |
| 0.6241E+00  | 0.2785E+00 | 0.2040E+04 |
| 0.7515E+00  | 0.2521E+00 | 0.2040E+04 |
| 0.8790E+00  | 0.2276E+00 | 0.2040E+04 |
| 0.1006E+01  | 0.2009E+00 | 0.2040E+04 |
| 0.1134E+01  | 0.1743E+00 | 0.2040E+04 |
| 0.1261E+01  | 0.1495E+00 | 0.2040E+04 |

V2\_Results\_baseline\_IEA\_accel.dat

|            |            |            |
|------------|------------|------------|
| 0.1389E+01 | 0.1287E+00 | 0.2040E+04 |
| 0.1516E+01 | 0.1095E+00 | 0.2040E+04 |
| 0.1644E+01 | 0.9474E-01 | 0.2040E+04 |
| 0.1771E+01 | 0.8153E-01 | 0.2040E+04 |
| 0.1899E+01 | 0.6818E-01 | 0.2040E+04 |
| 0.2026E+01 | 0.5598E-01 | 0.2040E+04 |
| 0.2154E+01 | 0.4604E-01 | 0.2040E+04 |
| 0.2281E+01 | 0.3771E-01 | 0.2040E+04 |
| 0.2409E+01 | 0.3046E-01 | 0.2040E+04 |
| 0.2536E+01 | 0.2540E-01 | 0.2040E+04 |
| 0.2664E+01 | 0.2089E-01 | 0.2040E+04 |
| 0.2791E+01 | 0.1708E-01 | 0.2040E+04 |
| 0.2918E+01 | 0.1339E-01 | 0.2040E+04 |
| 0.3046E+01 | 0.1133E-01 | 0.2040E+04 |
| 0.3173E+01 | 0.9444E-02 | 0.2040E+04 |
| 0.3301E+01 | 0.7442E-02 | 0.2040E+04 |
| 0.3428E+01 | 0.5315E-02 | 0.2040E+04 |
| 0.3556E+01 | 0.4181E-02 | 0.2040E+04 |
| 0.3683E+01 | 0.3445E-02 | 0.2040E+04 |
| 0.3811E+01 | 0.2814E-02 | 0.2040E+04 |
| 0.3938E+01 | 0.2245E-02 | 0.2040E+04 |
| 0.4066E+01 | 0.1881E-02 | 0.2040E+04 |
| 0.4193E+01 | 0.1632E-02 | 0.2040E+04 |
| 0.4321E+01 | 0.1282E-02 | 0.2040E+04 |
| 0.4448E+01 | 0.8578E-03 | 0.2040E+04 |
| 0.4576E+01 | 0.6155E-03 | 0.2040E+04 |
| 0.4703E+01 | 0.5705E-03 | 0.2040E+04 |
| 0.4830E+01 | 0.6475E-03 | 0.2040E+04 |
| 0.4958E+01 | 0.5522E-03 | 0.2040E+04 |
| 0.5085E+01 | 0.3998E-03 | 0.2040E+04 |
| 0.5213E+01 | 0.2351E-03 | 0.2040E+04 |
| 0.5340E+01 | 0.1797E-03 | 0.2040E+04 |
| 0.5468E+01 | 0.9976E-04 | 0.2040E+04 |
| 0.5595E+01 | 0.6555E-04 | 0.2040E+04 |
| 0.5723E+01 | 0.7228E-04 | 0.2040E+04 |
| 0.5850E+01 | 0.1018E-03 | 0.2040E+04 |

V2\_Results\_baseline\_IEA\_accel.dat

|             |            |            |
|-------------|------------|------------|
| 0.5978E+01  | 0.1075E-03 | 0.2040E+04 |
| 0.6105E+01  | 0.8874E-04 | 0.2040E+04 |
| 0.6233E+01  | 0.3388E-04 | 0.2040E+04 |
| 0.6360E+01  | 0.5407E-05 | 0.2040E+04 |
| 0.6488E+01  | 0.0000E+00 | 0.2040E+04 |
| 0.6615E+01  | 0.0000E+00 | 0.2040E+04 |
| 0.6742E+01  | 0.0000E+00 | 0.2040E+04 |
| 0.6870E+01  | 0.0000E+00 | 0.2040E+04 |
| 0.6997E+01  | 0.2057E-04 | 0.2040E+04 |
| 0.7125E+01  | 0.3155E-04 | 0.2040E+04 |
|             |            |            |
| -0.2887E+01 | 0.1629E-03 | 0.2050E+04 |
| -0.2754E+01 | 0.5037E-03 | 0.2050E+04 |
| -0.2621E+01 | 0.1135E-02 | 0.2050E+04 |
| -0.2487E+01 | 0.2556E-02 | 0.2050E+04 |
| -0.2354E+01 | 0.5192E-02 | 0.2050E+04 |
| -0.2221E+01 | 0.9990E-02 | 0.2050E+04 |
| -0.2088E+01 | 0.1937E-01 | 0.2050E+04 |
| -0.1954E+01 | 0.3438E-01 | 0.2050E+04 |
| -0.1821E+01 | 0.5454E-01 | 0.2050E+04 |
| -0.1688E+01 | 0.8231E-01 | 0.2050E+04 |
| -0.1554E+01 | 0.1179E+00 | 0.2050E+04 |
| -0.1421E+01 | 0.1590E+00 | 0.2050E+04 |
| -0.1288E+01 | 0.2034E+00 | 0.2050E+04 |
| -0.1155E+01 | 0.2509E+00 | 0.2050E+04 |
| -0.1021E+01 | 0.2949E+00 | 0.2050E+04 |
| -0.8882E+00 | 0.3360E+00 | 0.2050E+04 |
| -0.7549E+00 | 0.3708E+00 | 0.2050E+04 |
| -0.6217E+00 | 0.3938E+00 | 0.2050E+04 |
| -0.4884E+00 | 0.4089E+00 | 0.2050E+04 |
| -0.3552E+00 | 0.4196E+00 | 0.2050E+04 |
| -0.2219E+00 | 0.4222E+00 | 0.2050E+04 |
| -0.8866E-01 | 0.4152E+00 | 0.2050E+04 |
| 0.4459E-01  | 0.4007E+00 | 0.2050E+04 |
| 0.1778E+00  | 0.3785E+00 | 0.2050E+04 |
| 0.3111E+00  | 0.3498E+00 | 0.2050E+04 |

V2\_Results\_baseline\_IEA\_accel.dat

|            |            |            |
|------------|------------|------------|
| 0.4444E+00 | 0.3180E+00 | 0.2050E+04 |
| 0.5776E+00 | 0.2889E+00 | 0.2050E+04 |
| 0.7109E+00 | 0.2590E+00 | 0.2050E+04 |
| 0.8441E+00 | 0.2283E+00 | 0.2050E+04 |
| 0.9774E+00 | 0.1993E+00 | 0.2050E+04 |
| 0.1111E+01 | 0.1758E+00 | 0.2050E+04 |
| 0.1244E+01 | 0.1513E+00 | 0.2050E+04 |
| 0.1377E+01 | 0.1275E+00 | 0.2050E+04 |
| 0.1510E+01 | 0.1073E+00 | 0.2050E+04 |
| 0.1644E+01 | 0.9043E-01 | 0.2050E+04 |
| 0.1777E+01 | 0.7714E-01 | 0.2050E+04 |
| 0.1910E+01 | 0.6446E-01 | 0.2050E+04 |
| 0.2043E+01 | 0.5199E-01 | 0.2050E+04 |
| 0.2177E+01 | 0.4164E-01 | 0.2050E+04 |
| 0.2310E+01 | 0.3511E-01 | 0.2050E+04 |
| 0.2443E+01 | 0.2975E-01 | 0.2050E+04 |
| 0.2576E+01 | 0.2417E-01 | 0.2050E+04 |
| 0.2710E+01 | 0.1902E-01 | 0.2050E+04 |
| 0.2843E+01 | 0.1517E-01 | 0.2050E+04 |
| 0.2976E+01 | 0.1250E-01 | 0.2050E+04 |
| 0.3109E+01 | 0.1059E-01 | 0.2050E+04 |
| 0.3243E+01 | 0.8595E-02 | 0.2050E+04 |
| 0.3376E+01 | 0.6588E-02 | 0.2050E+04 |
| 0.3509E+01 | 0.5638E-02 | 0.2050E+04 |
| 0.3643E+01 | 0.4807E-02 | 0.2050E+04 |
| 0.3776E+01 | 0.3634E-02 | 0.2050E+04 |
| 0.3909E+01 | 0.2670E-02 | 0.2050E+04 |
| 0.4042E+01 | 0.2303E-02 | 0.2050E+04 |
| 0.4176E+01 | 0.1984E-02 | 0.2050E+04 |
| 0.4309E+01 | 0.1677E-02 | 0.2050E+04 |
| 0.4442E+01 | 0.1223E-02 | 0.2050E+04 |
| 0.4575E+01 | 0.9699E-03 | 0.2050E+04 |
| 0.4709E+01 | 0.8487E-03 | 0.2050E+04 |
| 0.4842E+01 | 0.7495E-03 | 0.2050E+04 |
| 0.4975E+01 | 0.5476E-03 | 0.2050E+04 |
| 0.5108E+01 | 0.4272E-03 | 0.2050E+04 |



V2\_Results\_baseline\_IEA\_accel.dat

|            |            |            |
|------------|------------|------------|
| 0.5242E+01 | 0.3605E-03 | 0.2050E+04 |
| 0.5375E+01 | 0.3075E-03 | 0.2050E+04 |
| 0.5508E+01 | 0.2335E-03 | 0.2050E+04 |
| 0.5641E+01 | 0.1947E-03 | 0.2050E+04 |
| 0.5775E+01 | 0.2517E-03 | 0.2050E+04 |
| 0.5908E+01 | 0.2551E-03 | 0.2050E+04 |
| 0.6041E+01 | 0.1872E-03 | 0.2050E+04 |
| 0.6174E+01 | 0.1012E-03 | 0.2050E+04 |
| 0.6308E+01 | 0.3880E-04 | 0.2050E+04 |
| 0.6441E+01 | 0.1250E-04 | 0.2050E+04 |
| 0.6574E+01 | 0.3008E-04 | 0.2050E+04 |
| 0.6707E+01 | 0.1260E-03 | 0.2050E+04 |
| 0.6841E+01 | 0.1739E-03 | 0.2050E+04 |
| 0.6974E+01 | 0.1246E-03 | 0.2050E+04 |
| 0.7107E+01 | 0.5563E-04 | 0.2050E+04 |
| 0.7240E+01 | 0.2034E-04 | 0.2050E+04 |
| 0.7374E+01 | 0.1574E-04 | 0.2050E+04 |
| 0.7507E+01 | 0.3096E-04 | 0.2050E+04 |
| 0.7640E+01 | 0.4572E-04 | 0.2050E+04 |
| 0.7773E+01 | 0.3294E-04 | 0.2050E+04 |

```

#*****
#*****          AVOIDED CARBON VALUES ($ tr.)          *****
#*****
# Valued at:    1 US$,    Social Carbon Cost,    Tax IEA,    Tax S.S.
               0.2283E+00    0.2796E+01    0.2640E+02    0.1647E+02

```

```

#*****
#*****          CAPOPEX (all; tr. US$): SUMMARY STATISTICS *****
#*****

```

MEAN, VARIANCE, SKW, KURT & MAX. VALUES 50%, 80%, 90%, 95%

|           |           |           |           |           |           |           |           |
|-----------|-----------|-----------|-----------|-----------|-----------|-----------|-----------|
| 0.166E+02 | 0.402E+01 | 0.533E+00 | 0.356E+01 | 0.164E+02 | 0.181E+02 | 0.192E+02 | 0.201E+02 |
|-----------|-----------|-----------|-----------|-----------|-----------|-----------|-----------|

# V2\_Results\_baseline\_IEA\_accel.dat

CapOpStrEx EXPECT. / ( CapOpStrEx > CapOpStrEx max. al 80%, 90%, 95%)

0.1975E+02 0.2049E+02 0.2133E+02

\*\*\*\*\*  
 #\*\*\*\*\* CAPITAL COSTS - AVOIDED CARBON VALUES (US\$ tr.) \*\*\*\*\*  
 #\*\*\*\*\*

# Valued at: 1 US\$, Social Carbon Cost, Tax IEA, Tax S.S.  
 0.1633E+02 0.1376E+02 -0.9845E+01 0.9348E-01

\*\*\*\*\*  
 #\*\*\*\*\* CAPITAL PRICES (USD/1W) \*\*\*\*\*  
 #\*\*\*\*\*

# MEANS, VARIANCES & MAX. VALUES 50%, 80%, 90%, 95%  
 # ALL YEARS: 2015-2050

|      |           |           |           |           |           |           |
|------|-----------|-----------|-----------|-----------|-----------|-----------|
| 2015 | 0.130E+01 | 0.680E-01 | 0.127E+01 | 0.149E+01 | 0.163E+01 | 0.176E+01 |
| 2016 | 0.109E+01 | 0.532E-01 | 0.106E+01 | 0.126E+01 | 0.139E+01 | 0.151E+01 |
| 2017 | 0.101E+01 | 0.458E-01 | 0.986E+00 | 0.117E+01 | 0.129E+01 | 0.140E+01 |
| 2018 | 0.960E+00 | 0.408E-01 | 0.934E+00 | 0.111E+01 | 0.122E+01 | 0.132E+01 |
| 2019 | 0.920E+00 | 0.375E-01 | 0.893E+00 | 0.107E+01 | 0.117E+01 | 0.126E+01 |
| 2020 | 0.888E+00 | 0.351E-01 | 0.863E+00 | 0.103E+01 | 0.113E+01 | 0.122E+01 |
| 2021 | 0.862E+00 | 0.334E-01 | 0.837E+00 | 0.999E+00 | 0.110E+01 | 0.119E+01 |
| 2022 | 0.839E+00 | 0.313E-01 | 0.819E+00 | 0.970E+00 | 0.107E+01 | 0.115E+01 |
| 2023 | 0.820E+00 | 0.303E-01 | 0.797E+00 | 0.951E+00 | 0.104E+01 | 0.113E+01 |
| 2024 | 0.803E+00 | 0.291E-01 | 0.779E+00 | 0.929E+00 | 0.102E+01 | 0.111E+01 |
| 2025 | 0.789E+00 | 0.279E-01 | 0.767E+00 | 0.915E+00 | 0.100E+01 | 0.108E+01 |
| 2026 | 0.776E+00 | 0.273E-01 | 0.755E+00 | 0.900E+00 | 0.991E+00 | 0.107E+01 |
| 2027 | 0.763E+00 | 0.263E-01 | 0.741E+00 | 0.888E+00 | 0.973E+00 | 0.105E+01 |
| 2028 | 0.756E+00 | 0.257E-01 | 0.737E+00 | 0.878E+00 | 0.963E+00 | 0.104E+01 |
| 2029 | 0.745E+00 | 0.253E-01 | 0.724E+00 | 0.865E+00 | 0.952E+00 | 0.103E+01 |

V2\_Results\_baseline\_IEA\_accel.dat

|      |           |           |           |           |           |           |
|------|-----------|-----------|-----------|-----------|-----------|-----------|
| 2030 | 0.736E+00 | 0.242E-01 | 0.714E+00 | 0.856E+00 | 0.935E+00 | 0.101E+01 |
| 2031 | 0.119E+01 | 0.652E-01 | 0.115E+01 | 0.138E+01 | 0.152E+01 | 0.164E+01 |
| 2032 | 0.118E+01 | 0.646E-01 | 0.115E+01 | 0.138E+01 | 0.151E+01 | 0.163E+01 |
| 2033 | 0.118E+01 | 0.643E-01 | 0.115E+01 | 0.138E+01 | 0.151E+01 | 0.163E+01 |
| 2034 | 0.117E+01 | 0.632E-01 | 0.114E+01 | 0.137E+01 | 0.150E+01 | 0.162E+01 |
| 2035 | 0.117E+01 | 0.626E-01 | 0.114E+01 | 0.136E+01 | 0.150E+01 | 0.162E+01 |
| 2036 | 0.117E+01 | 0.627E-01 | 0.114E+01 | 0.137E+01 | 0.150E+01 | 0.162E+01 |
| 2037 | 0.114E+01 | 0.581E-01 | 0.111E+01 | 0.132E+01 | 0.145E+01 | 0.157E+01 |
| 2038 | 0.111E+01 | 0.546E-01 | 0.108E+01 | 0.129E+01 | 0.141E+01 | 0.152E+01 |
| 2039 | 0.109E+01 | 0.519E-01 | 0.106E+01 | 0.127E+01 | 0.138E+01 | 0.149E+01 |
| 2040 | 0.902E+00 | 0.334E-01 | 0.880E+00 | 0.105E+01 | 0.114E+01 | 0.122E+01 |
| 2041 | 0.927E+00 | 0.353E-01 | 0.906E+00 | 0.107E+01 | 0.117E+01 | 0.126E+01 |
| 2042 | 0.994E+00 | 0.415E-01 | 0.972E+00 | 0.115E+01 | 0.126E+01 | 0.135E+01 |
| 2043 | 0.109E+01 | 0.524E-01 | 0.106E+01 | 0.127E+01 | 0.139E+01 | 0.150E+01 |
| 2044 | 0.109E+01 | 0.518E-01 | 0.106E+01 | 0.126E+01 | 0.138E+01 | 0.150E+01 |
| 2045 | 0.974E+00 | 0.394E-01 | 0.952E+00 | 0.113E+01 | 0.123E+01 | 0.132E+01 |
| 2046 | 0.728E+00 | 0.243E-01 | 0.708E+00 | 0.846E+00 | 0.926E+00 | 0.100E+01 |
| 2047 | 0.728E+00 | 0.243E-01 | 0.710E+00 | 0.847E+00 | 0.928E+00 | 0.101E+01 |
| 2048 | 0.728E+00 | 0.244E-01 | 0.711E+00 | 0.846E+00 | 0.929E+00 | 0.101E+01 |
| 2049 | 0.729E+00 | 0.245E-01 | 0.708E+00 | 0.847E+00 | 0.930E+00 | 0.101E+01 |
| 2050 | 0.729E+00 | 0.244E-01 | 0.710E+00 | 0.847E+00 | 0.932E+00 | 0.101E+01 |

#####  
#\*\*\*\*\* TOTAL COSTS USD/W: TIMELINE BREAKDOWN \*\*\*\*\*  
#\*\*\*\*\*

| #    | PV cap.(Mod+inv) | PV BoS   | PV Str   | W cap.   | W BoS    | W Str    |      |
|------|------------------|----------|----------|----------|----------|----------|------|
| 2015 | 0.386221         | 0.279606 | 0.122530 | 0.636433 | 0.272757 | 0.127387 | 2015 |
| 2016 | 0.348634         | 0.309215 | 0.132787 | 0.520878 | 0.223234 | 0.107439 |      |
| 2017 | 0.307020         | 0.303276 | 0.127623 | 0.495224 | 0.212239 | 0.103286 |      |
| 2018 | 0.280393         | 0.297459 | 0.122664 | 0.475968 | 0.203986 | 0.099290 |      |
| 2019 | 0.261619         | 0.291714 | 0.117881 | 0.460858 | 0.197511 | 0.095466 |      |
| 2020 | 0.247219         | 0.286051 | 0.113274 | 0.448464 | 0.192199 | 0.091800 | 2020 |
| 2021 | 0.235841         | 0.280578 | 0.108877 | 0.438131 | 0.187770 | 0.088244 |      |
| 2022 | 0.225260         | 0.274718 | 0.104465 | 0.429616 | 0.184121 | 0.085012 |      |

| V2_Results_baseline_IEA_accel.dat |          |          |          |          |          |          |
|-----------------------------------|----------|----------|----------|----------|----------|----------|
| 2023                              | 0.217324 | 0.269454 | 0.100408 | 0.421808 | 0.180775 | 0.081721 |
| 2024                              | 0.210534 | 0.264201 | 0.096475 | 0.414696 | 0.177727 | 0.078591 |
| 2025                              | 0.203450 | 0.258494 | 0.092497 | 0.409552 | 0.175522 | 0.075780 |
| 2026                              | 0.198022 | 0.253157 | 0.088770 | 0.404416 | 0.173321 | 0.072981 |
| 2027                              | 0.192854 | 0.248300 | 0.085320 | 0.398970 | 0.170987 | 0.070158 |
| 2028                              | 0.186871 | 0.241561 | 0.081339 | 0.398073 | 0.170603 | 0.068110 |
| 2029                              | 0.183124 | 0.237127 | 0.078244 | 0.393289 | 0.168552 | 0.065410 |
| 2030                              | 0.178671 | 0.232110 | 0.075052 | 0.389842 | 0.167075 | 0.063030 |
| 2031                              | 0.012523 | 0.015943 | 0.005052 | 0.821064 | 0.351884 | 0.127676 |
| 2032                              | 0.014978 | 0.018688 | 0.005803 | 0.814875 | 0.349232 | 0.121778 |
| 2033                              | 0.014597 | 0.017844 | 0.005430 | 0.816312 | 0.349848 | 0.117203 |
| 2034                              | 0.017836 | 0.021439 | 0.006393 | 0.807406 | 0.346031 | 0.111485 |
| 2035                              | 0.018712 | 0.022019 | 0.006434 | 0.804967 | 0.344986 | 0.106872 |
| 2036                              | 0.018156 | 0.020954 | 0.006000 | 0.806496 | 0.345641 | 0.102912 |
| 2037                              | 0.031066 | 0.035174 | 0.009869 | 0.773144 | 0.331347 | 0.094819 |
| 2038                              | 0.041171 | 0.045761 | 0.012582 | 0.747447 | 0.320334 | 0.088047 |
| 2039                              | 0.048830 | 0.053354 | 0.014375 | 0.726911 | 0.311533 | 0.082351 |
| 2040                              | 0.117454 | 0.125701 | 0.033188 | 0.548880 | 0.235234 | 0.059787 |
| 2041                              | 0.108062 | 0.113548 | 0.029378 | 0.573293 | 0.245697 | 0.059991 |
| 2042                              | 0.083620 | 0.086099 | 0.021830 | 0.636988 | 0.272995 | 0.064074 |
| 2043                              | 0.048232 | 0.048687 | 0.012096 | 0.728900 | 0.312386 | 0.070476 |
| 2044                              | 0.049365 | 0.048928 | 0.011912 | 0.725882 | 0.311092 | 0.067458 |
| 2045                              | 0.091021 | 0.088466 | 0.021106 | 0.617772 | 0.264760 | 0.055186 |
| 2046                              | 0.182118 | 0.173305 | 0.040518 | 0.382105 | 0.163759 | 0.032816 |
| 2047                              | 0.181912 | 0.169941 | 0.038934 | 0.382250 | 0.163822 | 0.031555 |
| 2048                              | 0.182012 | 0.166689 | 0.037423 | 0.382373 | 0.163874 | 0.030333 |
| 2049                              | 0.181880 | 0.163208 | 0.035906 | 0.383227 | 0.164240 | 0.029222 |
| 2050                              | 0.181736 | 0.160082 | 0.034512 | 0.382868 | 0.164086 | 0.028091 |
