# Supplementary material
Source: MDPI journal article supplement (https://www.mdpi.com/1996-1073/12/15/2875)
Supplement: s1 [file s1]

CWh\_Irena\_GW.dat

|      |          |
|------|----------|
| 2015 | 417.001  |
| 2016 | 584.094  |
| 2017 | 748.727  |
| 2018 | 910.898  |
| 2019 | 1070.609 |
| 2020 | 1227.859 |
| 2021 | 1382.647 |
| 2022 | 1534.975 |
| 2023 | 1684.842 |
| 2024 | 1832.248 |
| 2025 | 1977.193 |
| 2026 | 2119.677 |
| 2027 | 2259.700 |
| 2028 | 2397.262 |
| 2029 | 2532.363 |
| 2030 | 2665.003 |
| 2031 | 2795.182 |
| 2032 | 2922.900 |
| 2033 | 3048.158 |
| 2034 | 3170.954 |
| 2035 | 3291.289 |
| 2036 | 3409.164 |
| 2037 | 3524.577 |
| 2038 | 3637.530 |
| 2039 | 3748.021 |
| 2040 | 3856.052 |
| 2041 | 3961.621 |
| 2042 | 4064.730 |
| 2043 | 4165.377 |
| 2044 | 4263.564 |
| 2045 | 4359.290 |
| 2046 | 4452.554 |
| 2047 | 4543.358 |
| 2048 | 4631.701 |
| 2049 | 4717.583 |
| 2050 | 4801.004 |
