# Supplementary material
Source: MDPI journal article supplement (https://www.mdpi.com/1996-1073/12/15/2875)
Supplement: s1 [file s1]

# bkdown\_cost\_tline\_hist.dat

# \*\*\* CASO: 1, IEA ; 2, Irena : 1

#n° de simulaciones = 100000

# \*\*\*\*\* Parámetros Wind \*\*\*\*\*

#medias ec. precio Turbinas : 2.9666 -0.1860  
 #dev. est. parámetros ec. precio Turbinas : 0.0000 0.0130  
 #dev. est. ec. precio Turbinas : 0.0900  
 #valor inicial en 2014 de Cap 340.6110  
 #depreciación, Performance Ratio, kgCO2 0.984 1.000 0.780  
 #Life Span de los Turbinas 27  
 #Social Discount Rate 0.022500 0.019286  
 #WACC, Loan Maturity 0.050 15  
 #Generación aleatoria de los parámetros = T  
 #Generación aleatoria de los errs. de las ecs. = T  
 #Storage costs tenido en cuenta = T  
 #Modelo Precio Turbinas (1, old; 2, simple; 3, LR dec.; 4, LR +dec. 2

# \*\*\*\*\* Parámetros PV \*\*\*\*\*

#medias ec. precio módulos : 3.6025 -0.3200  
 #dev. est. parámetros ec. precio módulos : 0.1710 0.0240  
 #dev. est. ec. precio módulos : 0.3300  
 #valores iniciales en 2014 de Cap, Pe, Pm, Ps, upm : 157.7609 0.8229 0.7050  
 0.0760 0.0000  
 #depreciación, Performance Ratio, kgCO2 : 0.990 0.850 0.780  
 #Life Span de los módulos : 30  
 #Social Discount Rate : 0.022500 0.019286  
 #WACC, Loan Maturity : 0.090 7  
 #Generación aleatoria de los parámetros = T  
 #Generación aleatoria de los errs. de las ecs. = T  
 #Storage costs tenido en cuenta = T  
 #Modelo Precio módulos (1, old; 2, simple; 3, LR dec.; 4, LR +dec. : 2

bkdown\_cost\_tline\_hist.dat

```

#*****
#*****          TOTAL COSTS USD/W: TIMELINE BREAKDOWN          *****
#*****
#  PV cap.(Mod+inv)      PV BoS      PV Str      W cap.      W BoS      W Str
2015      0.386221      0.279606      0.122530      0.636433      0.272757      0.127387      2015
2016      0.345773      0.264161      0.113439      0.641313      0.274848      0.126786
2017      0.312654      0.248113      0.104410      0.648705      0.278017      0.126500
2018      0.304609      0.250636      0.103356      0.617521      0.264652      0.118599
2019      0.302915      0.257944      0.104235      0.577751      0.247607      0.109112
2020      0.290578      0.254939      0.100954      0.561335      0.240572      0.104120      2020
2021      0.283807      0.255859      0.099285      0.538010      0.230576      0.097836
2022      0.272261      0.252208      0.095905      0.524713      0.224877      0.093572
2023      0.264314      0.250127      0.093206      0.509590      0.218396      0.088923
2024      0.256120      0.246814      0.090126      0.497433      0.213186      0.084940
2025      0.244825      0.240372      0.086012      0.492909      0.211247      0.082264      2025
2026      0.236580      0.235290      0.082505      0.486064      0.208313      0.079246
2027      0.224273      0.225865      0.077611      0.489147      0.209634      0.077868
2028      0.218398      0.222314      0.074858      0.480449      0.205907      0.074591
2029      0.208232      0.213511      0.070451      0.483822      0.207352      0.073202
2030      0.203987      0.211141      0.068272      0.473327      0.202854      0.069811      2030
2031      0.223338      0.231874      0.073471      0.413805      0.177345      0.059256
2032      0.213707      0.221852      0.068885      0.422832      0.181214      0.058695
2033      0.204918      0.212166      0.064556      0.432047      0.185163      0.058077
2034      0.198118      0.204981      0.061119      0.435886      0.186808      0.056758
2035      0.186765      0.191847      0.056055      0.454225      0.194668      0.057251      2035
2036      0.182054      0.185962      0.053245      0.456720      0.195737      0.055667
2037      0.186238      0.189086      0.053053      0.438311      0.187847      0.051635
2038      0.178643      0.180198      0.049545      0.449134      0.192486      0.051083
2039      0.172586      0.173044      0.046624      0.455870      0.195373      0.050102
2040      0.190150      0.188665      0.049812      0.406687      0.174294      0.043162      2040
2041      0.179278      0.176311      0.045617      0.427408      0.183175      0.043752
2042      0.163121      0.158667      0.040228      0.462491      0.198210      0.045675
2043      0.171760      0.165169      0.041037      0.436099      0.186900      0.041536
2044      0.166227      0.158170      0.038509      0.445021      0.190723      0.040861

```

bkdwn\_cost\_tline\_hist.dat

|      |          |          |          |          |          |          |      |
|------|----------|----------|----------|----------|----------|----------|------|
| 2045 | 0.186970 | 0.175707 | 0.041920 | 0.388392 | 0.166454 | 0.034372 | 2045 |
| 2046 | 0.176508 | 0.163532 | 0.038233 | 0.411563 | 0.176384 | 0.035100 |      |
| 2047 | 0.175347 | 0.160591 | 0.036792 | 0.410173 | 0.175788 | 0.033697 |      |
| 2048 | 0.177810 | 0.160719 | 0.036083 | 0.400455 | 0.171623 | 0.031673 |      |
| 2049 | 0.184256 | 0.164321 | 0.036151 | 0.380530 | 0.163084 | 0.028977 |      |
| 2050 | 0.181800 | 0.160138 | 0.034524 | 0.382703 | 0.164015 | 0.028079 | 2050 |
