# Supplementary material
Source: MDPI journal article supplement (https://www.mdpi.com/1996-1073/12/15/2875)
Supplement: s1 [file s1]

A\_Irena\_PVRm\_2050.dat

|      |          |
|------|----------|
| 2015 | 230.000  |
| 2016 | 412.620  |
| 2017 | 594.780  |
| 2018 | 776.480  |
| 2019 | 957.720  |
| 2020 | 1138.500 |
| 2021 | 1318.820 |
| 2022 | 1498.680 |
| 2023 | 1678.080 |
| 2024 | 1857.020 |
| 2025 | 2035.500 |
| 2026 | 2213.520 |
| 2027 | 2391.080 |
| 2028 | 2568.180 |
| 2029 | 2744.820 |
| 2030 | 2921.000 |
| 2031 | 3096.720 |
| 2032 | 3271.980 |
| 2033 | 3446.780 |
| 2034 | 3621.120 |
| 2035 | 3795.000 |
| 2036 | 3968.420 |
| 2037 | 4141.380 |
| 2038 | 4313.880 |
| 2039 | 4485.920 |
| 2040 | 4657.500 |
| 2041 | 4828.620 |
| 2042 | 4999.280 |
| 2043 | 5169.480 |
| 2044 | 5339.220 |
| 2045 | 5508.500 |
| 2046 | 5677.320 |
| 2047 | 5845.680 |
| 2048 | 6013.580 |
| 2049 | 6181.020 |
| 2050 | 6348.000 |
