# Supplementary material
Source: MDPI journal article supplement (https://www.mdpi.com/1996-1073/12/15/2875)
Supplement: s1 [file s1 › supplementary material/Plots/1, 4, 5/Fig.1.txt.pdf]

```

                                roadmaps_all.txt
# set loadpath 'C:\LF9571\Bin\Aveiro_2019\Plots\roadmaps_all'
# load 'roadmaps_all.txt'

reset

set grid front
set border 3
set key outside Left spacing 2 title " \nROADMAPS (GW)\n\n " font "arial,14" box 3

set xrange [2010.0:2050.0]
set ytics font "Helvetica,12"
set y2tics font "Helvetica,12"

set ylabel '{/:Italic GW}' offset 1,0 font "Helvetica,14"
set xlabel '{/:Italic Historic and Roadmap (years)}' font "Helvetica,14"

set arrow from 2015,0 to 2015,7000 nohead lt -1 lw 1 front
set label 'Historic' at 2011,4500 font "Helvetica,14"
set arrow from 2013.5,4300 to 2011,4300
set label 'Roadmaps' at 2016,4500 font "Helvetica,14"
set arrow from 2016,4300 to 2019.5,4300

set label 'IRENA' at 2036,5500 font "Helvetica,14"
set arrow from 2038,5400 to 2043.5,5252 front
set arrow from 2037.9,5400 to 2041.5,4050 front
set label 'PV' at 2042.7,5350 font "Helvetica,10"
set label 'Wind' at 2041.8,3950 font "Helvetica,10"

set label 'IEA' at 2047,2600 font "Helvetica,14"
set arrow from 2047.5,2700 to 2044,3030
set arrow from 2047.6,2700 to 2046,3400
set label 'PV' at 2045.8,3650 font "Helvetica,10"
set label 'Wind' at 2043,2900 font "Helvetica,10"

set style fill transparent solid 0.2 noborder
plot 'wind_data\CWh_and_rm_Irena_GW.dat' u 1:2 w l lw 2 lc rgb "#0000ff" t '      Wind Irena

```

roadmaps\_all.txt

```
' \
, 'wind_data\CWh_and_rm_IEA_GW.dat' u 1:2 w 1 lw 2 lc rgb "#0000ff" t '      Wind IEA ' \
, 'wind_data\CWh_and_rm_IEA_GW.dat' u 1:2 w p pt 3 ps 1 lc rgb "#0000ff" notitle \
, 'pv_data\Irena_Cap_hist_y_rm.dat' u 1:2 w 1 lw 2 lc rgb "#ff0000" t '      PV Irena ' \
, 'pv_data\IEA_Cap_hist_y_rm.dat' u 1:2 w 1 lw 2 lc rgb "#ff0000" t '      PV IEA ' \
, 'pv_data\IEA_Cap_hist_y_rm.dat' u 1:2 w p pt 3 ps 1 lc rgb "#ff0000" notitle \
, 'conjuntos_pv_wind\Irena_rm_pv_wind_GW.dat' u 1:2:3 with filledcurves above fc rgb
"#0000ff" notitle \
, 'conjuntos_pv_wind\Irena_rm_pv_wind_GW.dat' u 1:2:3 with filledcurves below fc rgb
"#ff0000" notitle \
, 'conjuntos_pv_wind\IEA_rm_pv_wind_GW.dat' u 1:2:3 with filledcurves above fc rgb
"#ff0000" notitle \
, 'conjuntos_pv_wind\IEA_rm_pv_wind_GW.dat' u 1:2:3 with filledcurves below fc rgb
"#0000ff" notitle
```
