# Supplementary material
Source: MDPI journal article supplement (https://www.mdpi.com/1996-1073/12/15/2875)
Supplement: s1 [file s1 › supplementary material/Plots/1, 4, 5/Fig.4.txt.pdf]

```

                                pdf_cdf_T_PV_W.txt
# set loadpath 'C:\LF9571\Bin\Aveiro_2019\Plots\pdf_cdf_T_PV_W'
# load 'pdf_cdf_T_PV_W.txt'

reset

set style fill transparent solid 0.4 noborder

set style data lines

set key outside Left spacing 2 title " \nDensities\n\n " font
"arial,14" box 3
set grid

set size 1,1
set origin 0,0
set multiplot layout 2,1 margins 0.1,0.8,0.05,0.95 spacing 0

set xrange [30.0:100.0] ; set xtics format "" ; set x2tics
#set yrange [0:0.06]

plot 'pdf_cdf_T_PV_W.dat' u 2:3 w filledcurves fc rgb "#ff00ff" t
'    p.d.f. Total ' \
    ,'' u 5:6 w filledcurves fc rgb "#ff0000" t '    p.d.f. PV ' \
    ,'' u 8:9 w filledcurves fc rgb "#0000ff" t '    p.d.f. Wind'

unset key

set key outside Left spacing 2 title " \nDistributions\n\n " font
"arial,14" box 3
set xtics ; set format x "%g" ; unset x2tics
#set xrange [20.0:100.0]
set ytics(0,0.2,0.4,0.6,0.8)
plot 'pdf_cdf_T_PV_W.dat' u 2:4 w filledcurves xl fc rgb "#ff00ff"
lc rgb "#ff00ff" t '    c.d.f. Total ' \
    ,'' u 5:7 w filledcurves xl fc rgb "#ff0000" lc rgb "#ff0000"
t '    c.d.f. PV ' \
    ,'' u 8:10 w filledcurves xl fc rgb "#0000ff" lc rgb
"#0000ff" t '    c.d.f. Wind'

unset multiplot

```
