# Supplementary material
Source: MDPI journal article supplement (https://www.mdpi.com/1996-1073/12/15/2875)
Supplement: s1 [file s1 › supplementary material/Plots/1, 4, 5/Fig.5.txt.pdf]

bkdwn\_cost\_tline\_hist.txt

```
# set loadpath 'C:\LF9571\Bin\Aveiro_2019\Plots\bkdwn_cost_tline'
# load 'bkdwn_cost_tline_hist.txt'
```

```
reset
```

```
set multiplot
#pause -1 "3D_years_aumentado"
#set border 4095
set grid front
set key outside Left spacing 2 title " \nLegend\n\n " font "arial,14" box 3
set y2tics
```

```
set origin 0.1,0.5
set size 0.8,0.5
set xrange [2013.5:2051.5]
set yrange [0:1]
set title "A) {/:Italic Energy type and cost item (%)}." offset -30,0 font "arial,12"
plot 'bkdwn_cost_tline_hist.dat' u 1:((($2+$3+$4+$5+$6+$7)/($2+$3+$4+$5+$6+$7)) w boxes fs
solid t '    Wind storage    ' lc rgb "#add8e6" \
, '' u 1:((($2+$3+$4+$5+$6)/($2+$3+$4+$5+$6+$7)) w boxes fs solid t '    Wind BoS' lc rgb
"#0000ff" \
, '' u 1:((($2+$3+$4+$5)/($2+$3+$4+$5+$6+$7)) w boxes fs solid t '    Wind capital' lc rgb
"#00008b" \
, '' u 1:((($2+$3+$4)/($2+$3+$4+$5+$6+$7)) w boxes fs solid t '    PV storage' lc rgb
"#e6d8ad" \
, '' u 1:((($2+$3)/($2+$3+$4+$5+$6+$7)) w boxes fs solid t '    PV BoS' lc rgb "#ff0000" \
, '' u 1:($2/($2+$3+$4+$5+$6+$7)) w boxes fs solid t '    PV capital' lc rgb "#8b0000"
```

```
#unset arrow ; unset label ; unset border ; unset xtics ; unset ytics ; unset border ; unset
grid
unset yrange
unset xrange
unset title
```

bkdwn\_cost\_tline\_hist.txt

```
# ; unset key

set linetype 1 lc rgb "#ff0000"
set linetype 2 lc rgb "#00ff00"
set linetype 3 lc rgb "#0000ff"

set origin 0.1,0.0
set size 0.8,0.5
set boxwidth 3 relative
#set boxwidth 0.9 relative
set style data histograms
set style histogram cluster gap 3
set style fill solid 1.0 noborder

set title "B) {/:Italic Cost item (US$/W)}." offset -35,0 font "arial,12"
plot 'bkdwn_cost_tline_hist.dat' u ($2+$5):xtic(8) t '    PV+Wind capital' \
    , '' u ($3+$6) t '    PV+Wind BoS' \
    , '' u ($4+$7) t '    PV+Wind storage'

unset multiplot
```
