# Supplementary material
Source: MDPI journal article supplement (https://www.mdpi.com/1996-1073/12/15/2875)
Supplement: s1 [file s1 › supplementary material/Plots/2/Fig.2.5pc_tail.dat.pdf]

pdf\_T\_risks\_stats\_5pc\_tail.dat

```
# *** CASO: 1, IEA ; 2, Irena :      1

#nº de simulaciones =      100000

#      *****      Parámetros Wind      *****

#medias ec. precio Turbinas :          2.9666          -0.1860
#dev. est. parámetros ec. precio Turbinas :          0.0000          0.0130
#dev. est. ec. precio Turbinas :          0.0900
#valor inicial en 2014 de Cap      340.6110
#depreciación, Performance Ratio, kgCO2          0.984          1.000          0.780
#Life Span de los Turbinas      27
#Social Discount Rate 0.022500 0.019286
#WACC, Loan Maturity      0.050  15
#Generación aleatoria de los parámetros = T
#Generación aleatoria de los errs. de las ecs. = T
#Storage costs tenido en cuenta = T
#Modelo Precio Turbinas (1, old; 2, simple; 3, LR dec.; 4, LR +dec.      2

#      *****      Parámetros PV      *****

#medias ec. precio módulos :          3.6025          -0.3200
#dev. est. parámetros ec. precio módulos :          0.1710          0.0240
#dev. est. ec. precio módulos :          0.3300
#valores iniciales en 2014 de Cap, Pe, Pm, Ps, upm :          157.7609          0.8229          0.7050
0.0760          0.0000
#depreciación, Performance Ratio, kgCO2 :          0.990          0.850          0.780
#Life Span de los módulos :      30
#Social Discount Rate : 0.022500 0.019286
#WACC, Loan Maturity :      0.090  7
#Generación aleatoria de los parámetros = T
#Generación aleatoria de los errs. de las ecs. = T
#Storage costs tenido en cuenta = T
#Modelo Precio módulos (1, old; 2, simple; 3, LR dec.; 4, LR +dec. :      2
```

## pdf\_T\_risks\_stats\_5pc\_tail.dat

```

#*****
# p.d.f. & C.d.f LCE (US$/MWh): TOTAL, PV, WIND (Smoothed, NOT standardised)
#*****
#          Total          PV          Wind

#          *****          NOT standardised          *****

  10  0.6761E+02  0.1212E-01  0.9463E+00  0.6030E+02  0.1287E-01  0.9138E+00  0.8223E+02
0.5578E-02  0.9627E+00
  15  0.6846E+02  0.1029E-01  0.9556E+00  0.6174E+02  0.1048E-01  0.9301E+00  0.8351E+02
0.4775E-02  0.9692E+00
  20  0.6931E+02  0.8692E-02  0.9635E+00  0.6317E+02  0.8624E-02  0.9435E+00  0.8479E+02
0.4061E-02  0.9748E+00
  25  0.7015E+02  0.7283E-02  0.9702E+00  0.6460E+02  0.7185E-02  0.9545E+00  0.8607E+02
0.3265E-02  0.9794E+00
  30  0.7100E+02  0.6052E-02  0.9757E+00  0.6603E+02  0.5811E-02  0.9636E+00  0.8735E+02
0.2636E-02  0.9831E+00
  35  0.7185E+02  0.5055E-02  0.9803E+00  0.6747E+02  0.4636E-02  0.9709E+00  0.8863E+02
0.2207E-02  0.9861E+00
  40  0.7270E+02  0.4049E-02  0.9841E+00  0.6890E+02  0.3739E-02  0.9768E+00  0.8991E+02
0.1866E-02  0.9887E+00
  45  0.7355E+02  0.3275E-02  0.9871E+00  0.7033E+02  0.2843E-02  0.9814E+00  0.9119E+02
0.1502E-02  0.9908E+00
  50  0.7440E+02  0.2665E-02  0.9896E+00  0.7176E+02  0.2230E-02  0.9849E+00  0.9247E+02
0.1218E-02  0.9925E+00
  55  0.7524E+02  0.2212E-02  0.9916E+00  0.7320E+02  0.1866E-02  0.9878E+00  0.9374E+02
0.9981E-03  0.9938E+00
  60  0.7609E+02  0.1825E-02  0.9933E+00  0.7463E+02  0.1524E-02  0.9902E+00  0.9502E+02
0.8328E-03  0.9950E+00
  65  0.7694E+02  0.1527E-02  0.9947E+00  0.7606E+02  0.1221E-02  0.9921E+00  0.9630E+02
0.6539E-03  0.9959E+00
  70  0.7779E+02  0.1247E-02  0.9958E+00  0.7749E+02  0.9901E-03  0.9936E+00  0.9758E+02
0.5573E-03  0.9967E+00
  75  0.7864E+02  0.9668E-03  0.9967E+00  0.7892E+02  0.8032E-03  0.9949E+00  0.9886E+02
0.4904E-03  0.9973E+00

```

| pdf_T_risks_stats_5pc_tail.dat |            |            |            |            |            |            |            |
|--------------------------------|------------|------------|------------|------------|------------|------------|------------|
| 80                             | 0.7948E+02 | 0.7227E-03 | 0.9974E+00 | 0.8036E+02 | 0.6598E-03 | 0.9959E+00 | 0.1001E+03 |
| 0.4382E-03                     | 0.9979E+00 |            |            |            |            |            |            |
| 85                             | 0.8033E+02 | 0.5772E-03 | 0.9980E+00 | 0.8179E+02 | 0.5111E-03 | 0.9967E+00 | 0.1014E+03 |
| 0.3373E-03                     | 0.9984E+00 |            |            |            |            |            |            |
| 90                             | 0.8118E+02 | 0.4889E-03 | 0.9984E+00 | 0.8322E+02 | 0.4287E-03 | 0.9974E+00 | 0.1027E+03 |
| 0.2449E-03                     | 0.9988E+00 |            |            |            |            |            |            |
| 95                             | 0.8203E+02 | 0.3955E-03 | 0.9988E+00 | 0.8465E+02 | 0.3408E-03 | 0.9979E+00 | 0.1040E+03 |
| 0.1787E-03                     | 0.9990E+00 |            |            |            |            |            |            |
| 100                            | 0.8288E+02 | 0.2684E-03 | 0.9990E+00 | 0.8609E+02 | 0.2585E-03 | 0.9983E+00 | 0.1053E+03 |
| 0.1482E-03                     | 0.9992E+00 |            |            |            |            |            |            |
| 105                            | 0.8372E+02 | 0.1814E-03 | 0.9992E+00 | 0.8752E+02 | 0.2258E-03 | 0.9987E+00 | 0.1065E+03 |
| 0.1063E-03                     | 0.9994E+00 |            |            |            |            |            |            |
| 110                            | 0.8457E+02 | 0.1569E-03 | 0.9994E+00 | 0.8895E+02 | 0.1731E-03 | 0.9989E+00 | 0.1078E+03 |
| 0.7395E-04                     | 0.9995E+00 |            |            |            |            |            |            |
| 115                            | 0.8542E+02 | 0.1368E-03 | 0.9995E+00 | 0.9038E+02 | 0.1169E-03 | 0.9991E+00 | 0.1091E+03 |
| 0.4539E-04                     | 0.9996E+00 |            |            |            |            |            |            |
| 120                            | 0.8627E+02 | 0.1178E-03 | 0.9996E+00 | 0.9182E+02 | 0.1015E-03 | 0.9993E+00 | 0.1104E+03 |
| 0.4659E-04                     | 0.9996E+00 |            |            |            |            |            |            |
| 125                            | 0.8712E+02 | 0.8216E-04 | 0.9997E+00 | 0.9325E+02 | 0.7387E-04 | 0.9994E+00 | 0.1117E+03 |
| 0.5710E-04                     | 0.9997E+00 |            |            |            |            |            |            |
| 130                            | 0.8797E+02 | 0.5698E-04 | 0.9997E+00 | 0.9468E+02 | 0.5840E-04 | 0.9995E+00 | 0.1129E+03 |
| 0.5209E-04                     | 0.9998E+00 |            |            |            |            |            |            |
| 135                            | 0.8881E+02 | 0.5275E-04 | 0.9998E+00 | 0.9611E+02 | 0.7602E-04 | 0.9996E+00 | 0.1142E+03 |
| 0.3098E-04                     | 0.9998E+00 |            |            |            |            |            |            |
| 140                            | 0.8966E+02 | 0.5081E-04 | 0.9998E+00 | 0.9755E+02 | 0.7294E-04 | 0.9997E+00 | 0.1155E+03 |
| 0.1351E-04                     | 0.9999E+00 |            |            |            |            |            |            |
| 145                            | 0.9051E+02 | 0.3556E-04 | 0.9998E+00 | 0.9898E+02 | 0.5085E-04 | 0.9998E+00 | 0.1168E+03 |
| 0.1029E-04                     | 0.9999E+00 |            |            |            |            |            |            |
| 150                            | 0.9136E+02 | 0.1449E-04 | 0.9999E+00 | 0.1004E+03 | 0.3543E-04 | 0.9998E+00 | 0.1181E+03 |
| 0.1161E-04                     | 0.9999E+00 |            |            |            |            |            |            |
| 155                            | 0.9221E+02 | 0.1811E-04 | 0.9999E+00 | 0.1018E+03 | 0.2103E-04 | 0.9999E+00 | 0.1193E+03 |
| 0.1617E-04                     | 0.9999E+00 |            |            |            |            |            |            |
| 160                            | 0.9305E+02 | 0.1772E-04 | 0.9999E+00 | 0.1033E+03 | 0.1149E-04 | 0.9999E+00 | 0.1206E+03 |
| 0.1639E-04                     | 0.9999E+00 |            |            |            |            |            |            |
| 165                            | 0.9390E+02 | 0.2192E-04 | 0.9999E+00 | 0.1047E+03 | 0.1574E-04 | 0.9999E+00 | 0.1219E+03 |
| 0.1496E-04                     | 0.9999E+00 |            |            |            |            |            |            |

pdf\_T\_risks\_stats\_5pc\_tail.dat

|            |            |            |            |            |            |            |            |
|------------|------------|------------|------------|------------|------------|------------|------------|
| 170        | 0.9475E+02 | 0.2305E-04 | 0.9999E+00 | 0.1061E+03 | 0.1373E-04 | 0.9999E+00 | 0.1232E+03 |
| 0.9736E-05 | 0.1000E+01 |            |            |            |            |            |            |
| 175        | 0.9560E+02 | 0.2228E-04 | 0.1000E+01 | 0.1076E+03 | 0.8577E-05 | 0.1000E+01 | 0.1245E+03 |
| 0.6233E-05 | 0.1000E+01 |            |            |            |            |            |            |
| 180        | 0.9645E+02 | 0.9864E-05 | 0.1000E+01 | 0.1090E+03 | 0.7090E-05 | 0.1000E+01 | 0.1257E+03 |
| 0.4015E-05 | 0.1000E+01 |            |            |            |            |            |            |
| 185        | 0.9729E+02 | 0.4628E-05 | 0.1000E+01 | 0.1104E+03 | 0.9155E-05 | 0.1000E+01 | 0.1270E+03 |
| 0.3255E-05 | 0.1000E+01 |            |            |            |            |            |            |
| 190        | 0.9814E+02 | 0.1022E-04 | 0.1000E+01 | 0.1119E+03 | 0.6984E-05 | 0.1000E+01 | 0.1283E+03 |
| 0.5286E-05 | 0.1000E+01 |            |            |            |            |            |            |
| 195        | 0.9899E+02 | 0.1611E-04 | 0.1000E+01 | 0.1133E+03 | 0.1304E-05 | 0.1000E+01 | 0.1296E+03 |
| 0.6373E-05 | 0.1000E+01 |            |            |            |            |            |            |
| 200        | 0.9984E+02 | 0.1318E-04 | 0.1000E+01 | 0.1147E+03 | 0.3857E-05 | 0.1000E+01 | 0.1309E+03 |
| 0.4806E-05 | 0.1000E+01 |            |            |            |            |            |            |
