# Supplementary material
Source: MDPI journal article supplement (https://www.mdpi.com/1996-1073/12/15/2875)
Supplement: s1 [file s1 › supplementary material/Plots/2/Fig.2.dat.pdf]

pdf\_T\_risks\_stats.dat

```
# *** CASO: 1, IEA ; 2, Irena :      1

#nº de simulaciones =      100000

#      *****      Parámetros Wind      *****

#medias ec. precio Turbinas :          2.9666      -0.1860
#dev. est. parámetros ec. precio Turbinas :          0.0000      0.0130
#dev. est. ec. precio Turbinas :          0.0900
#valor inicial en 2014 de Cap      340.6110
#depreciación, Performance Ratio, kgCO2          0.984      1.000      0.780
#Life Span de los Turbinas      27
#Social Discount Rate 0.022500 0.019286
#WACC, Loan Maturity      0.050  15
#Generación aleatoria de los parámetros = T
#Generación aleatoria de los errs. de las ecs. = T
#Storage costs tenido en cuenta = T
#Modelo Precio Turbinas (1, old; 2, simple; 3, LR dec.; 4, LR +dec.      2

#      *****      Parámetros PV      *****

#medias ec. precio módulos :          3.6025      -0.3200
#dev. est. parámetros ec. precio módulos :          0.1710      0.0240
#dev. est. ec. precio módulos :          0.3300
#valores iniciales en 2014 de Cap, Pe, Pm, Ps, upm :          157.7609      0.8229      0.7050
0.0760      0.0000
#depreciación, Performance Ratio, kgCO2 :          0.990      0.850      0.780
#Life Span de los módulos :      30
#Social Discount Rate : 0.022500 0.019286
#WACC, Loan Maturity :      0.090  7
#Generación aleatoria de los parámetros = T
#Generación aleatoria de los errs. de las ecs. = T
#Storage costs tenido en cuenta = T
#Modelo Precio módulos (1, old; 2, simple; 3, LR dec.; 4, LR +dec. :      2
```

## pdf\_T\_risks\_stats.dat

```

#*****
# p.d.f. & C.d.f LCE (US$/MWh): TOTAL, PV, WIND (Smoothed, NOT standardised)
#*****
#          Total          PV          Wind

#          *****          NOT standardised          *****

-200  0.3199E+02  0.4527E-05  0.7678E-06  0.1432E+00  0.0000E+00  0.2210E-05  0.2847E+02
0.7126E-05  0.1824E-05
-195  0.3284E+02  0.6672E-05  0.5103E-05  0.1576E+01  0.0000E+00  0.9846E-05  0.2975E+02
0.1700E-04  0.1789E-04
-190  0.3369E+02  0.2313E-04  0.1788E-04  0.3008E+01  0.0000E+00  0.1001E-04  0.3103E+02
0.4821E-04  0.5964E-04
-185  0.3453E+02  0.4609E-04  0.5028E-04  0.4440E+01  0.0000E+00  0.1001E-04  0.3231E+02
0.1167E-03  0.1692E-03
-180  0.3538E+02  0.6612E-04  0.9835E-04  0.5873E+01  0.0000E+00  0.1001E-04  0.3359E+02
0.2614E-03  0.4182E-03
-175  0.3623E+02  0.1322E-03  0.1848E-03  0.7305E+01  0.0000E+00  0.1001E-04  0.3487E+02
0.4973E-03  0.9245E-03
-170  0.3708E+02  0.3132E-03  0.3772E-03  0.8738E+01  0.0000E+00  0.1001E-04  0.3615E+02
0.8459E-03  0.1815E-02
-165  0.3793E+02  0.5811E-03  0.7738E-03  0.1017E+02  0.0000E+00  0.1001E-04  0.3743E+02
0.1435E-02  0.3321E-02
-160  0.3877E+02  0.9886E-03  0.1457E-02  0.1160E+02  0.0000E+00  0.1001E-04  0.3871E+02
0.2282E-02  0.5776E-02
-155  0.3962E+02  0.1658E-02  0.2615E-02  0.1303E+02  0.0000E+00  0.1001E-04  0.3999E+02
0.3525E-02  0.9611E-02
-150  0.4047E+02  0.2817E-02  0.4577E-02  0.1447E+02  0.0000E+00  0.1001E-04  0.4127E+02
0.5100E-02  0.1531E-01
-145  0.4132E+02  0.4417E-02  0.7744E-02  0.1590E+02  0.0000E+00  0.1001E-04  0.4255E+02
0.7138E-02  0.2336E-01
-140  0.4217E+02  0.6662E-02  0.1259E-01  0.1733E+02  0.0000E+00  0.1001E-04  0.4383E+02
0.9525E-02  0.3428E-01
-135  0.4302E+02  0.9424E-02  0.1961E-01  0.1876E+02  0.0000E+00  0.1001E-04  0.4511E+02
0.1240E-01  0.4861E-01

```

pdf\_T\_risks\_stats.dat

|            |            |            |            |            |            |            |            |
|------------|------------|------------|------------|------------|------------|------------|------------|
| -130       | 0.4386E+02 | 0.1294E-01 | 0.2933E-01 | 0.2020E+02 | 0.0000E+00 | 0.1001E-04 | 0.4639E+02 |
| 0.1584E-01 | 0.6708E-01 |            |            |            |            |            |            |
| -125       | 0.4471E+02 | 0.1698E-01 | 0.4230E-01 | 0.2163E+02 | 0.0000E+00 | 0.1001E-04 | 0.4767E+02 |
| 0.1968E-01 | 0.9029E-01 |            |            |            |            |            |            |
| -120       | 0.4556E+02 | 0.2179E-01 | 0.5913E-01 | 0.2306E+02 | 0.0000E+00 | 0.1001E-04 | 0.4895E+02 |
| 0.2354E-01 | 0.1184E+00 |            |            |            |            |            |            |
| -115       | 0.4641E+02 | 0.2689E-01 | 0.8017E-01 | 0.2449E+02 | 0.0000E+00 | 0.1001E-04 | 0.5023E+02 |
| 0.2712E-01 | 0.1513E+00 |            |            |            |            |            |            |
| -110       | 0.4726E+02 | 0.3249E-01 | 0.1058E+00 | 0.2593E+02 | 0.0000E+00 | 0.1001E-04 | 0.5151E+02 |
| 0.3019E-01 | 0.1885E+00 |            |            |            |            |            |            |
| -105       | 0.4810E+02 | 0.3793E-01 | 0.1362E+00 | 0.2736E+02 | 0.0000E+00 | 0.1001E-04 | 0.5279E+02 |
| 0.3278E-01 | 0.2291E+00 |            |            |            |            |            |            |
| -100       | 0.4895E+02 | 0.4310E-01 | 0.1710E+00 | 0.2879E+02 | 0.0000E+00 | 0.1001E-04 | 0.5407E+02 |
| 0.3491E-01 | 0.2728E+00 |            |            |            |            |            |            |
| -95        | 0.4980E+02 | 0.4780E-01 | 0.2100E+00 | 0.3022E+02 | 0.1191E-05 | 0.1035E-04 | 0.5535E+02 |
| 0.3632E-01 | 0.3186E+00 |            |            |            |            |            |            |
| -90        | 0.5065E+02 | 0.5171E-01 | 0.2525E+00 | 0.3166E+02 | 0.1228E-03 | 0.8915E-04 | 0.5663E+02 |
| 0.3754E-01 | 0.3660E+00 |            |            |            |            |            |            |
| -85        | 0.5150E+02 | 0.5459E-01 | 0.2980E+00 | 0.3309E+02 | 0.7943E-03 | 0.7214E-03 | 0.5791E+02 |
| 0.3850E-01 | 0.4148E+00 |            |            |            |            |            |            |
| -80        | 0.5234E+02 | 0.5669E-01 | 0.3454E+00 | 0.3452E+02 | 0.3502E-02 | 0.3870E-02 | 0.5919E+02 |
| 0.3890E-01 | 0.4645E+00 |            |            |            |            |            |            |
| -75        | 0.5319E+02 | 0.5817E-01 | 0.3943E+00 | 0.3595E+02 | 0.9576E-02 | 0.1371E-01 | 0.6047E+02 |
| 0.3811E-01 | 0.5138E+00 |            |            |            |            |            |            |
| -70        | 0.5404E+02 | 0.5864E-01 | 0.4439E+00 | 0.3739E+02 | 0.1897E-01 | 0.3509E-01 | 0.6175E+02 |
| 0.3659E-01 | 0.5615E+00 |            |            |            |            |            |            |
| -65        | 0.5489E+02 | 0.5822E-01 | 0.4935E+00 | 0.3882E+02 | 0.3053E-01 | 0.7212E-01 | 0.6303E+02 |
| 0.3487E-01 | 0.6070E+00 |            |            |            |            |            |            |
| -60        | 0.5574E+02 | 0.5673E-01 | 0.5422E+00 | 0.4025E+02 | 0.4175E-01 | 0.1257E+00 | 0.6431E+02 |
| 0.3299E-01 | 0.6502E+00 |            |            |            |            |            |            |
| -55        | 0.5659E+02 | 0.5458E-01 | 0.5893E+00 | 0.4168E+02 | 0.5078E-01 | 0.1936E+00 | 0.6559E+02 |
| 0.3080E-01 | 0.6908E+00 |            |            |            |            |            |            |
| -50        | 0.5743E+02 | 0.5176E-01 | 0.6341E+00 | 0.4312E+02 | 0.5623E-01 | 0.2715E+00 | 0.6687E+02 |
| 0.2828E-01 | 0.7283E+00 |            |            |            |            |            |            |
| -45        | 0.5828E+02 | 0.4861E-01 | 0.6765E+00 | 0.4455E+02 | 0.5761E-01 | 0.3537E+00 | 0.6815E+02 |
| 0.2585E-01 | 0.7626E+00 |            |            |            |            |            |            |

```

pdf_T_risks_stats.dat
-40 0.5913E+02 0.4517E-01 0.7159E+00 0.4598E+02 0.5618E-01 0.4352E+00 0.6943E+02
0.2364E-01 0.7940E+00
-35 0.5998E+02 0.4168E-01 0.7524E+00 0.4741E+02 0.5347E-01 0.5135E+00 0.7071E+02
0.2135E-01 0.8225E+00
-30 0.6083E+02 0.3831E-01 0.7861E+00 0.4884E+02 0.4891E-01 0.5864E+00 0.7199E+02
0.1890E-01 0.8479E+00
-25 0.6167E+02 0.3434E-01 0.8166E+00 0.5028E+02 0.4347E-01 0.6518E+00 0.7327E+02
0.1668E-01 0.8704E+00
-20 0.6252E+02 0.3040E-01 0.8437E+00 0.5171E+02 0.3859E-01 0.7098E+00 0.7455E+02
0.1457E-01 0.8901E+00
-15 0.6337E+02 0.2656E-01 0.8675E+00 0.5314E+02 0.3330E-01 0.7606E+00 0.7583E+02
0.1267E-01 0.9073E+00
-10 0.6422E+02 0.2338E-01 0.8884E+00 0.5457E+02 0.2779E-01 0.8036E+00 0.7711E+02
0.1092E-01 0.9222E+00
-5 0.6507E+02 0.2019E-01 0.9066E+00 0.5601E+02 0.2307E-01 0.8391E+00 0.7839E+02
0.9410E-02 0.9350E+00
0 0.6591E+02 0.1719E-01 0.9222E+00 0.5744E+02 0.1934E-01 0.8689E+00 0.7967E+02
0.7990E-02 0.9459E+00
5 0.6676E+02 0.1438E-01 0.9353E+00 0.5887E+02 0.1598E-01 0.8937E+00 0.8095E+02
0.6642E-02 0.9551E+00
10 0.6761E+02 0.1212E-01 0.9463E+00 0.6030E+02 0.1287E-01 0.9138E+00 0.8223E+02
0.5578E-02 0.9627E+00
15 0.6846E+02 0.1029E-01 0.9556E+00 0.6174E+02 0.1048E-01 0.9301E+00 0.8351E+02
0.4775E-02 0.9692E+00
20 0.6931E+02 0.8692E-02 0.9635E+00 0.6317E+02 0.8624E-02 0.9435E+00 0.8479E+02
0.4061E-02 0.9748E+00
25 0.7015E+02 0.7283E-02 0.9702E+00 0.6460E+02 0.7185E-02 0.9545E+00 0.8607E+02
0.3265E-02 0.9794E+00
30 0.7100E+02 0.6052E-02 0.9757E+00 0.6603E+02 0.5811E-02 0.9636E+00 0.8735E+02
0.2636E-02 0.9831E+00
35 0.7185E+02 0.5055E-02 0.9803E+00 0.6747E+02 0.4636E-02 0.9709E+00 0.8863E+02
0.2207E-02 0.9861E+00
40 0.7270E+02 0.4049E-02 0.9841E+00 0.6890E+02 0.3739E-02 0.9768E+00 0.8991E+02
0.1866E-02 0.9887E+00
45 0.7355E+02 0.3275E-02 0.9871E+00 0.7033E+02 0.2843E-02 0.9814E+00 0.9119E+02
0.1502E-02 0.9908E+00

```

| pdf_T_risks_stats.dat |            |            |            |            |            |            |            |  |
|-----------------------|------------|------------|------------|------------|------------|------------|------------|--|
| 50                    | 0.7440E+02 | 0.2665E-02 | 0.9896E+00 | 0.7176E+02 | 0.2230E-02 | 0.9849E+00 | 0.9247E+02 |  |
| 0.1218E-02            | 0.9925E+00 |            |            |            |            |            |            |  |
| 55                    | 0.7524E+02 | 0.2212E-02 | 0.9916E+00 | 0.7320E+02 | 0.1866E-02 | 0.9878E+00 | 0.9374E+02 |  |
| 0.9981E-03            | 0.9938E+00 |            |            |            |            |            |            |  |
| 60                    | 0.7609E+02 | 0.1825E-02 | 0.9933E+00 | 0.7463E+02 | 0.1524E-02 | 0.9902E+00 | 0.9502E+02 |  |
| 0.8328E-03            | 0.9950E+00 |            |            |            |            |            |            |  |
| 65                    | 0.7694E+02 | 0.1527E-02 | 0.9947E+00 | 0.7606E+02 | 0.1221E-02 | 0.9921E+00 | 0.9630E+02 |  |
| 0.6539E-03            | 0.9959E+00 |            |            |            |            |            |            |  |
| 70                    | 0.7779E+02 | 0.1247E-02 | 0.9958E+00 | 0.7749E+02 | 0.9901E-03 | 0.9936E+00 | 0.9758E+02 |  |
| 0.5573E-03            | 0.9967E+00 |            |            |            |            |            |            |  |
| 75                    | 0.7864E+02 | 0.9668E-03 | 0.9967E+00 | 0.7892E+02 | 0.8032E-03 | 0.9949E+00 | 0.9886E+02 |  |
| 0.4904E-03            | 0.9973E+00 |            |            |            |            |            |            |  |
| 80                    | 0.7948E+02 | 0.7227E-03 | 0.9974E+00 | 0.8036E+02 | 0.6598E-03 | 0.9959E+00 | 0.1001E+03 |  |
| 0.4382E-03            | 0.9979E+00 |            |            |            |            |            |            |  |
| 85                    | 0.8033E+02 | 0.5772E-03 | 0.9980E+00 | 0.8179E+02 | 0.5111E-03 | 0.9967E+00 | 0.1014E+03 |  |
| 0.3373E-03            | 0.9984E+00 |            |            |            |            |            |            |  |
| 90                    | 0.8118E+02 | 0.4889E-03 | 0.9984E+00 | 0.8322E+02 | 0.4287E-03 | 0.9974E+00 | 0.1027E+03 |  |
| 0.2449E-03            | 0.9988E+00 |            |            |            |            |            |            |  |
| 95                    | 0.8203E+02 | 0.3955E-03 | 0.9988E+00 | 0.8465E+02 | 0.3408E-03 | 0.9979E+00 | 0.1040E+03 |  |
| 0.1787E-03            | 0.9990E+00 |            |            |            |            |            |            |  |
| 100                   | 0.8288E+02 | 0.2684E-03 | 0.9990E+00 | 0.8609E+02 | 0.2585E-03 | 0.9983E+00 | 0.1053E+03 |  |
| 0.1482E-03            | 0.9992E+00 |            |            |            |            |            |            |  |
| 105                   | 0.8372E+02 | 0.1814E-03 | 0.9992E+00 | 0.8752E+02 | 0.2258E-03 | 0.9987E+00 | 0.1065E+03 |  |
| 0.1063E-03            | 0.9994E+00 |            |            |            |            |            |            |  |
| 110                   | 0.8457E+02 | 0.1569E-03 | 0.9994E+00 | 0.8895E+02 | 0.1731E-03 | 0.9989E+00 | 0.1078E+03 |  |
| 0.7395E-04            | 0.9995E+00 |            |            |            |            |            |            |  |
| 115                   | 0.8542E+02 | 0.1368E-03 | 0.9995E+00 | 0.9038E+02 | 0.1169E-03 | 0.9991E+00 | 0.1091E+03 |  |
| 0.4539E-04            | 0.9996E+00 |            |            |            |            |            |            |  |
| 120                   | 0.8627E+02 | 0.1178E-03 | 0.9996E+00 | 0.9182E+02 | 0.1015E-03 | 0.9993E+00 | 0.1104E+03 |  |
| 0.4659E-04            | 0.9996E+00 |            |            |            |            |            |            |  |
| 125                   | 0.8712E+02 | 0.8216E-04 | 0.9997E+00 | 0.9325E+02 | 0.7387E-04 | 0.9994E+00 | 0.1117E+03 |  |
| 0.5710E-04            | 0.9997E+00 |            |            |            |            |            |            |  |
| 130                   | 0.8797E+02 | 0.5698E-04 | 0.9997E+00 | 0.9468E+02 | 0.5840E-04 | 0.9995E+00 | 0.1129E+03 |  |
| 0.5209E-04            | 0.9998E+00 |            |            |            |            |            |            |  |
| 135                   | 0.8881E+02 | 0.5275E-04 | 0.9998E+00 | 0.9611E+02 | 0.7602E-04 | 0.9996E+00 | 0.1142E+03 |  |
| 0.3098E-04            | 0.9998E+00 |            |            |            |            |            |            |  |

pdf\_T\_risks\_stats.dat

|            |            |            |            |            |            |            |            |
|------------|------------|------------|------------|------------|------------|------------|------------|
| 140        | 0.8966E+02 | 0.5081E-04 | 0.9998E+00 | 0.9755E+02 | 0.7294E-04 | 0.9997E+00 | 0.1155E+03 |
| 0.1351E-04 | 0.9999E+00 |            |            |            |            |            |            |
| 145        | 0.9051E+02 | 0.3556E-04 | 0.9998E+00 | 0.9898E+02 | 0.5085E-04 | 0.9998E+00 | 0.1168E+03 |
| 0.1029E-04 | 0.9999E+00 |            |            |            |            |            |            |
| 150        | 0.9136E+02 | 0.1449E-04 | 0.9999E+00 | 0.1004E+03 | 0.3543E-04 | 0.9998E+00 | 0.1181E+03 |
| 0.1161E-04 | 0.9999E+00 |            |            |            |            |            |            |
| 155        | 0.9221E+02 | 0.1811E-04 | 0.9999E+00 | 0.1018E+03 | 0.2103E-04 | 0.9999E+00 | 0.1193E+03 |
| 0.1617E-04 | 0.9999E+00 |            |            |            |            |            |            |
| 160        | 0.9305E+02 | 0.1772E-04 | 0.9999E+00 | 0.1033E+03 | 0.1149E-04 | 0.9999E+00 | 0.1206E+03 |
| 0.1639E-04 | 0.9999E+00 |            |            |            |            |            |            |
| 165        | 0.9390E+02 | 0.2192E-04 | 0.9999E+00 | 0.1047E+03 | 0.1574E-04 | 0.9999E+00 | 0.1219E+03 |
| 0.1496E-04 | 0.9999E+00 |            |            |            |            |            |            |
| 170        | 0.9475E+02 | 0.2305E-04 | 0.9999E+00 | 0.1061E+03 | 0.1373E-04 | 0.9999E+00 | 0.1232E+03 |
| 0.9736E-05 | 0.1000E+01 |            |            |            |            |            |            |
| 175        | 0.9560E+02 | 0.2228E-04 | 0.1000E+01 | 0.1076E+03 | 0.8577E-05 | 0.1000E+01 | 0.1245E+03 |
| 0.6233E-05 | 0.1000E+01 |            |            |            |            |            |            |
| 180        | 0.9645E+02 | 0.9864E-05 | 0.1000E+01 | 0.1090E+03 | 0.7090E-05 | 0.1000E+01 | 0.1257E+03 |
| 0.4015E-05 | 0.1000E+01 |            |            |            |            |            |            |
| 185        | 0.9729E+02 | 0.4628E-05 | 0.1000E+01 | 0.1104E+03 | 0.9155E-05 | 0.1000E+01 | 0.1270E+03 |
| 0.3255E-05 | 0.1000E+01 |            |            |            |            |            |            |
| 190        | 0.9814E+02 | 0.1022E-04 | 0.1000E+01 | 0.1119E+03 | 0.6984E-05 | 0.1000E+01 | 0.1283E+03 |
| 0.5286E-05 | 0.1000E+01 |            |            |            |            |            |            |
| 195        | 0.9899E+02 | 0.1611E-04 | 0.1000E+01 | 0.1133E+03 | 0.1304E-05 | 0.1000E+01 | 0.1296E+03 |
| 0.6373E-05 | 0.1000E+01 |            |            |            |            |            |            |
| 200        | 0.9984E+02 | 0.1318E-04 | 0.1000E+01 | 0.1147E+03 | 0.3857E-05 | 0.1000E+01 | 0.1309E+03 |
| 0.4806E-05 | 0.1000E+01 |            |            |            |            |            |            |
