# Supplementary material
Source: MDPI journal article supplement (https://www.mdpi.com/1996-1073/12/15/2875)
Supplement: s1 [file s1 › supplementary material/Plots/2/Fig.2.txt.pdf]

```

                                pdf_T_risks_stats.txt
# set loadpath 'C:\LF9571\Bin\Aveiro_2019\Plots\pdf_T_risks_stats'
# load 'pdf_T_risks_stats.txt'
#
# *****

reset
set grid front
set border 3

set key right top Left spacing 2 title " \nLegend\n\n " font "arial,14" box 3

set xrange [35.0:90.0]
#set xtics (29.0,35.0,40.4,41.0,41.7,45.0,50.0,50.7,55.0,60.0,65.0)
set xtics nomirror out scale 4 font "Helvetica,14" (35.0,40.0,50.0,54.89,60.0,70.0,80.0,90.0)
set label '54.04' at 52.0,-0.0012 font "Helvetica,12"
set label '55.7' at 55.8,-0.0012 font "Helvetica,12"
set label '67.61' at 66.6,-0.0014 font "Helvetica,12"

set ytics font "Helvetica,12"
set y2tics font "Helvetica,12"

set ylabel 'p.d.f. value' offset 1,0 font "Helvetica,14"
set xlabel 'LCE (US$/MWh)' font "Helvetica,14"

set arrow from 54.04,-0.0009 to 54.04,0.06 nohead front
set arrow from 54.89,0.0 to 54.89,0.06 nohead front
set arrow from 55.70,-0.0009 to 55.70,0.06 nohead
set arrow from 67.61,-0.0009 to 67.61,0.06 nohead front

set label 'Mean' at 56.5,0.034 font "Helvetica,14"
set arrow from 56.5,0.033 to 55.7,0.032 filled
set label 'Median' at 56.5,0.024 font "Helvetica,14"
set arrow from 56.5,0.023 to 54.89,0.0215 filled
set label 'Mode' at 56.5,0.014 font "Helvetica,14"
set arrow from 56.5,0.013 to 54.04,0.011 front

```

pdf\_T\_risks\_stats.txt

```
#set title "PROBABILITY DENSITY FUNCTIONS(Kernel smoothed) \nLCE average IEA RM " font
"arial,12"

set label "      50%\nProbability" at 48.0,0.019 front font "Helvetica,14"
set label "      5%\nProbability" at 73.0,0.013 front font "Helvetica,14"
set arrow from 73.0,0.0106 to 69.2,0.007 front

plot \
'pdf_T_risks_stats_median.dat' u 2:3 with filledcurves xl \
fill solid 0.7 lc rgb "#add8e6" title '  50% Probability' \
, 'pdf_T_risks_stats_5pc_tail.dat' u 2:3 with filledcurves xl \
fill solid 0.7 lc rgb "#f03232" title '  5% Probability' \
, 'pdf_T_risks_stats.dat' using 2:3 w l lt -1 lw 2 lc rgb "#000080" title '  p.d.f. avg. RM'
```
