# Supplementary material
Source: MDPI journal article supplement (https://www.mdpi.com/1996-1073/12/15/2875)
Supplement: s1 [file s1 › supplementary material/Plots/3/V1_Results_baseline_T_3D_2020.dat.pdf]

# V1\_Results\_baseline\_T\_3D\_2020.dat

# \*\*\* CASO: 1, IEA ; 2, Irena : 1

#n° de simulaciones = 100000

# \*\*\*\*\* Parámetros Wind \*\*\*\*\*

#medias ec. precio Turbinas : 2.9666 -0.1860  
 #dev. est. parámetros ec. precio Turbinas : 0.0000 0.0130  
 #dev. est. ec. precio Turbinas : 0.0900  
 #valor inicial en 2014 de Cap 340.6110  
 #depreciación, Performance Ratio, kgCO2 0.984 1.000 0.780  
 #Life Span de los Turbinas 27  
 #Social Discount Rate 0.022500 0.019286  
 #WACC, Loan Maturity 0.050 15  
 #Generación aleatoria de los parámetros = T  
 #Generación aleatoria de los errs. de las ecs. = T  
 #Storage costs tenido en cuenta = T  
 #Modelo Precio Turbinas (1, old; 2, simple; 3, LR dec.; 4, LR +dec. 2

# \*\*\*\*\* Parámetros PV \*\*\*\*\*

#medias ec. precio módulos : 3.6025 -0.3200  
 #dev. est. parámetros ec. precio módulos : 0.1710 0.0240  
 #dev. est. ec. precio módulos : 0.3300  
 #valores iniciales en 2014 de Cap, Pe, Pm, Ps, upm : 157.7609 0.8229 0.7050  
 0.0760 0.0000  
 #depreciación, Performance Ratio, kgCO2 : 0.990 0.850 0.780  
 #Life Span de los módulos : 30  
 #Social Discount Rate : 0.022500 0.019286  
 #WACC, Loan Maturity : 0.090 7  
 #Generación aleatoria de los parámetros = T  
 #Generación aleatoria de los errs. de las ecs. = T  
 #Storage costs tenido en cuenta = T  
 #Modelo Precio módulos (1, old; 2, simple; 3, LR dec.; 4, LR +dec. : 2

# V1\_Results\_baseline\_T\_3D\_2020.dat

```

#*****
#***  p.d.f. LCE (US$/MWh): TOTAL 2020, 2030, 2040 ,2050 (Smoothed, Not standardised) ***
#*****
#          2020          2030          2040          2050
#  *****      NOT standardised      *****
#  *****      adaptados para un plot en 3D con gnuplot      *****

#          2020

0.3905E+02  0.1162E-04  0.2020E+04  0xff0000
0.4032E+02  0.2638E-04  0.2020E+04  0xff0000
0.4159E+02  0.5030E-04  0.2020E+04  0xff0000
0.4287E+02  0.1073E-03  0.2020E+04  0xff0000
0.4414E+02  0.2534E-03  0.2020E+04  0xff0000
0.4542E+02  0.5550E-03  0.2020E+04  0xff0000
0.4669E+02  0.1011E-02  0.2020E+04  0xff0000
0.4797E+02  0.1761E-02  0.2020E+04  0xff0000
0.4924E+02  0.2989E-02  0.2020E+04  0xff0000
0.5052E+02  0.4959E-02  0.2020E+04  0xff0000
0.5179E+02  0.7458E-02  0.2020E+04  0xff0000
0.5307E+02  0.1043E-01  0.2020E+04  0xff0000
0.5434E+02  0.1401E-01  0.2020E+04  0xff0000
0.5562E+02  0.1796E-01  0.2020E+04  0xff0000
0.5689E+02  0.2216E-01  0.2020E+04  0xff0000
0.5817E+02  0.2650E-01  0.2020E+04  0xff0000
0.5944E+02  0.3083E-01  0.2020E+04  0xff0000
0.6071E+02  0.3482E-01  0.2020E+04  0xff0000
0.6199E+02  0.3819E-01  0.2020E+04  0xff0000
0.6326E+02  0.4071E-01  0.2020E+04  0xff0000
0.6454E+02  0.4210E-01  0.2020E+04  0xff0000
0.6581E+02  0.4283E-01  0.2020E+04  0xff0000
0.6709E+02  0.4285E-01  0.2020E+04  0xff0000
0.6836E+02  0.4189E-01  0.2020E+04  0xff0000
0.6964E+02  0.3998E-01  0.2020E+04  0xff0000
0.7091E+02  0.3784E-01  0.2020E+04  0xff0000

```

V1\_Results\_baseline\_T\_3D\_2020.dat

|            |            |            |          |
|------------|------------|------------|----------|
| 0.7219E+02 | 0.3532E-01 | 0.2020E+04 | 0xff0000 |
| 0.7346E+02 | 0.3236E-01 | 0.2020E+04 | 0xff0000 |
| 0.7474E+02 | 0.2924E-01 | 0.2020E+04 | 0xff0000 |
| 0.7601E+02 | 0.2621E-01 | 0.2020E+04 | 0xff0000 |
| 0.7728E+02 | 0.2324E-01 | 0.2020E+04 | 0xff0000 |
| 0.7856E+02 | 0.2048E-01 | 0.2020E+04 | 0xff0000 |
| 0.7983E+02 | 0.1789E-01 | 0.2020E+04 | 0xff0000 |
| 0.8111E+02 | 0.1566E-01 | 0.2020E+04 | 0xff0000 |
| 0.8238E+02 | 0.1349E-01 | 0.2020E+04 | 0xff0000 |
| 0.8366E+02 | 0.1149E-01 | 0.2020E+04 | 0xff0000 |
| 0.8493E+02 | 0.9748E-02 | 0.2020E+04 | 0xff0000 |
| 0.8621E+02 | 0.8374E-02 | 0.2020E+04 | 0xff0000 |
| 0.8748E+02 | 0.7107E-02 | 0.2020E+04 | 0xff0000 |
| 0.8876E+02 | 0.5819E-02 | 0.2020E+04 | 0xff0000 |
| 0.9003E+02 | 0.4714E-02 | 0.2020E+04 | 0xff0000 |
| 0.9131E+02 | 0.3759E-02 | 0.2020E+04 | 0xff0000 |
| 0.9258E+02 | 0.3125E-02 | 0.2020E+04 | 0xff0000 |
| 0.9386E+02 | 0.2592E-02 | 0.2020E+04 | 0xff0000 |
| 0.9513E+02 | 0.2133E-02 | 0.2020E+04 | 0xff0000 |
| 0.9640E+02 | 0.1738E-02 | 0.2020E+04 | 0xff0000 |
| 0.9768E+02 | 0.1425E-02 | 0.2020E+04 | 0xff0000 |
| 0.9895E+02 | 0.1159E-02 | 0.2020E+04 | 0xff0000 |
| 0.1002E+03 | 0.9389E-03 | 0.2020E+04 | 0xff0000 |
| 0.1015E+03 | 0.7484E-03 | 0.2020E+04 | 0xff0000 |
| 0.1028E+03 | 0.5773E-03 | 0.2020E+04 | 0xff0000 |
| 0.1041E+03 | 0.4817E-03 | 0.2020E+04 | 0xff0000 |
| 0.1053E+03 | 0.4196E-03 | 0.2020E+04 | 0xff0000 |
| 0.1066E+03 | 0.3734E-03 | 0.2020E+04 | 0xff0000 |
| 0.1079E+03 | 0.3142E-03 | 0.2020E+04 | 0xff0000 |
| 0.1092E+03 | 0.2580E-03 | 0.2020E+04 | 0xff0000 |
| 0.1104E+03 | 0.1844E-03 | 0.2020E+04 | 0xff0000 |
| 0.1117E+03 | 0.1423E-03 | 0.2020E+04 | 0xff0000 |
| 0.1130E+03 | 0.1288E-03 | 0.2020E+04 | 0xff0000 |
| 0.1142E+03 | 0.1140E-03 | 0.2020E+04 | 0xff0000 |
| 0.1155E+03 | 0.7417E-04 | 0.2020E+04 | 0xff0000 |
| 0.1168E+03 | 0.4934E-04 | 0.2020E+04 | 0xff0000 |

V1\_Results\_baseline\_T\_3D\_2020.dat

|            |            |            |          |
|------------|------------|------------|----------|
| 0.1181E+03 | 0.5368E-04 | 0.2020E+04 | 0xff0000 |
| 0.1193E+03 | 0.5538E-04 | 0.2020E+04 | 0xff0000 |
| 0.1206E+03 | 0.4520E-04 | 0.2020E+04 | 0xff0000 |
| 0.1219E+03 | 0.2967E-04 | 0.2020E+04 | 0xff0000 |
| 0.1232E+03 | 0.2878E-04 | 0.2020E+04 | 0xff0000 |
| 0.1244E+03 | 0.3213E-04 | 0.2020E+04 | 0xff0000 |
| 0.1257E+03 | 0.3075E-04 | 0.2020E+04 | 0xff0000 |
| 0.1270E+03 | 0.2186E-04 | 0.2020E+04 | 0xff0000 |
| 0.1283E+03 | 0.1365E-04 | 0.2020E+04 | 0xff0000 |
| 0.1295E+03 | 0.7433E-05 | 0.2020E+04 | 0xff0000 |
| 0.1308E+03 | 0.5058E-05 | 0.2020E+04 | 0xff0000 |
| 0.1321E+03 | 0.6038E-05 | 0.2020E+04 | 0xff0000 |
| 0.1334E+03 | 0.7800E-05 | 0.2020E+04 | 0xff0000 |
| 0.1346E+03 | 0.9623E-05 | 0.2020E+04 | 0xff0000 |
| 0.1359E+03 | 0.9168E-05 | 0.2020E+04 | 0xff0000 |
| 0.1372E+03 | 0.6874E-05 | 0.2020E+04 | 0xff0000 |
| 0.1385E+03 | 0.4445E-05 | 0.2020E+04 | 0xff0000 |
| 0.1397E+03 | 0.6752E-05 | 0.2020E+04 | 0xff0000 |
| 0.1410E+03 | 0.6061E-05 | 0.2020E+04 | 0xff0000 |
