# Supplementary material
Source: MDPI journal article supplement (https://www.mdpi.com/1996-1073/12/15/2875)
Supplement: s1 [file s1 › supplementary material/Plots/3/V1_Results_baseline_T_3D_2020_salteado.dat.pdf]

# V1\_Results\_baseline\_T\_3D\_2020\_salteado.dat

# \*\*\* CASO: 1, IEA ; 2, Irena : 1

#n° de simulaciones = 100000

# \*\*\*\*\* Parámetros Wind \*\*\*\*\*

#medias ec. precio Turbinas : 2.9666 -0.1860  
 #dev. est. parámetros ec. precio Turbinas : 0.0000 0.0130  
 #dev. est. ec. precio Turbinas : 0.0900  
 #valor inicial en 2014 de Cap 340.6110  
 #depreciación, Performance Ratio, kgCO2 0.984 1.000 0.780  
 #Life Span de los Turbinas 27  
 #Social Discount Rate 0.022500 0.019286  
 #WACC, Loan Maturity 0.050 15  
 #Generación aleatoria de los parámetros = T  
 #Generación aleatoria de los errs. de las ecs. = T  
 #Storage costs tenido en cuenta = T  
 #Modelo Precio Turbinas (1, old; 2, simple; 3, LR dec.; 4, LR +dec. 2

# \*\*\*\*\* Parámetros PV \*\*\*\*\*

#medias ec. precio módulos : 3.6025 -0.3200  
 #dev. est. parámetros ec. precio módulos : 0.1710 0.0240  
 #dev. est. ec. precio módulos : 0.3300  
 #valores iniciales en 2014 de Cap, Pe, Pm, Ps, upm : 157.7609 0.8229 0.7050  
 0.0760 0.0000  
 #depreciación, Performance Ratio, kgCO2 : 0.990 0.850 0.780  
 #Life Span de los módulos : 30  
 #Social Discount Rate : 0.022500 0.019286  
 #WACC, Loan Maturity : 0.090 7  
 #Generación aleatoria de los parámetros = T  
 #Generación aleatoria de los errs. de las ecs. = T  
 #Storage costs tenido en cuenta = T  
 #Modelo Precio módulos (1, old; 2, simple; 3, LR dec.; 4, LR +dec. : 2

# V1\_Results\_baseline\_T\_3D\_2020\_salteado.dat

```

#*****
#***  p.d.f. LCE (US$/MWh): TOTAL 2020, 2030, 2040 ,2050 (Smoothed, Not standardised) ***
#*****
#          2020          2030          2040          2050
#  *****      NOT standardised      *****
#  *****      adaptados para un plot en 3D con gnuplot      *****

#          2020

0.3905E+02  0.1162E-04  0.2020E+04  0xff0000
0.4414E+02  0.2534E-03  0.2020E+04  0xff0000
0.4924E+02  0.2989E-02  0.2020E+04  0xff0000
0.5434E+02  0.1401E-01  0.2020E+04  0xff0000
0.5944E+02  0.3083E-01  0.2020E+04  0xff0000
0.6454E+02  0.4210E-01  0.2020E+04  0xff0000
0.6964E+02  0.3998E-01  0.2020E+04  0xff0000
0.7474E+02  0.2924E-01  0.2020E+04  0xff0000
0.7983E+02  0.1789E-01  0.2020E+04  0xff0000
0.8493E+02  0.9748E-02  0.2020E+04  0xff0000
0.9003E+02  0.4714E-02  0.2020E+04  0xff0000
0.9513E+02  0.2133E-02  0.2020E+04  0xff0000
0.1002E+03  0.9389E-03  0.2020E+04  0xff0000

```

|            |            | V1_Results_baseline_T_3D_2020_salteado.dat |          |
|------------|------------|--------------------------------------------|----------|
| 0.1053E+03 | 0.4196E-03 | 0.2020E+04                                 | 0xff0000 |
| 0.1104E+03 | 0.1844E-03 | 0.2020E+04                                 | 0xff0000 |
| 0.1155E+03 | 0.7417E-04 | 0.2020E+04                                 | 0xff0000 |
| 0.1206E+03 | 0.4520E-04 | 0.2020E+04                                 | 0xff0000 |
| 0.1257E+03 | 0.3075E-04 | 0.2020E+04                                 | 0xff0000 |
| 0.1308E+03 | 0.5058E-05 | 0.2020E+04                                 | 0xff0000 |
| 0.1359E+03 | 0.9168E-05 | 0.2020E+04                                 | 0xff0000 |
| 0.1410E+03 | 0.6061E-05 | 0.2020E+04                                 | 0xff0000 |
