# Supplementary material
Source: MDPI journal article supplement (https://www.mdpi.com/1996-1073/12/15/2875)
Supplement: s1 [file s1 › supplementary material/Plots/3/V1_Results_baseline_T_3D_2040_salteado - copia.dat.pdf]

V1\_Results\_baseline\_T\_3D\_2040\_salteado - copia.dat

# \*\*\* CASO: 1, IEA ; 2, Irena : 1

#n° de simulaciones = 100000

# \*\*\*\*\* Parámetros Wind \*\*\*\*\*

#medias ec. precio Turbinas : 2.9666 -0.1860  
 #dev. est. parámetros ec. precio Turbinas : 0.0000 0.0130  
 #dev. est. ec. precio Turbinas : 0.0900  
 #valor inicial en 2014 de Cap 340.6110  
 #depreciación, Performance Ratio, kgCO2 0.984 1.000 0.780  
 #Life Span de los Turbinas 27  
 #Social Discount Rate 0.022500 0.019286  
 #WACC, Loan Maturity 0.050 15  
 #Generación aleatoria de los parámetros = T  
 #Generación aleatoria de los errs. de las ecs. = T  
 #Storage costs tenido en cuenta = T  
 #Modelo Precio Turbinas (1, old; 2, simple; 3, LR dec.; 4, LR +dec. 2

# \*\*\*\*\* Parámetros PV \*\*\*\*\*

#medias ec. precio módulos : 3.6025 -0.3200  
 #dev. est. parámetros ec. precio módulos : 0.1710 0.0240  
 #dev. est. ec. precio módulos : 0.3300  
 #valores iniciales en 2014 de Cap, Pe, Pm, Ps, upm : 157.7609 0.8229 0.7050  
 0.0760 0.0000  
 #depreciación, Performance Ratio, kgCO2 : 0.990 0.850 0.780  
 #Life Span de los módulos : 30  
 #Social Discount Rate : 0.022500 0.019286  
 #WACC, Loan Maturity : 0.090 7  
 #Generación aleatoria de los parámetros = T  
 #Generación aleatoria de los errs. de las ecs. = T  
 #Storage costs tenido en cuenta = T  
 #Modelo Precio módulos (1, old; 2, simple; 3, LR dec.; 4, LR +dec. : 2

# Vl\_Results\_baseline\_T\_3D\_2040\_salteado - copia.dat

```

#*****
#***  p.d.f. LCE (US$/MWh): TOTAL 2020, 2030, 2040 ,2050 (Smoothed, Not standardised) ***
#*****
#          2020          2030          2040          2050
#  *****      NOT standardised      *****
#  *****      adaptados para un plot en 3D con gnuplot      *****

#          2040

0.2543E+02  0.1213E-04  0.2040E+04  0x00ffff
0.2938E+02  0.3373E-03  0.2040E+04  0x00ffff
0.3334E+02  0.5010E-02  0.2040E+04  0x00ffff
0.3730E+02  0.2368E-01  0.2040E+04  0x00ffff
0.4125E+02  0.4906E-01  0.2040E+04  0x00ffff
0.4521E+02  0.6003E-01  0.2040E+04  0x00ffff
0.4916E+02  0.4994E-01  0.2040E+04  0x00ffff
0.5312E+02  0.3206E-01  0.2040E+04  0x00ffff
0.5707E+02  0.1761E-01  0.2040E+04  0x00ffff
0.6103E+02  0.8363E-02  0.2040E+04  0x00ffff
0.6499E+02  0.3775E-02  0.2040E+04  0x00ffff
0.6894E+02  0.1507E-02  0.2040E+04  0x00ffff
0.7290E+02  0.6160E-03  0.2040E+04  0x00ffff

```

V1\_Results\_baseline\_T\_3D\_2040\_salteado - copia.dat

|            |            |            |          |
|------------|------------|------------|----------|
| 0.7685E+02 | 0.2279E-03 | 0.2040E+04 | 0x00ffff |
| 0.8081E+02 | 0.8741E-04 | 0.2040E+04 | 0x00ffff |
| 0.8476E+02 | 0.4030E-04 | 0.2040E+04 | 0x00ffff |
| 0.8872E+02 | 0.3121E-04 | 0.2040E+04 | 0x00ffff |
| 0.9268E+02 | 0.7868E-05 | 0.2040E+04 | 0x00ffff |
| 0.9663E+02 | 0.4352E-05 | 0.2040E+04 | 0x00ffff |
| 0.1006E+03 | 0.0000E+00 | 0.2040E+04 | 0x00ffff |
| 0.1045E+03 | 0.0000E+00 | 0.2040E+04 | 0x00ffff |
