# Supplementary material
Source: MDPI journal article supplement (https://www.mdpi.com/1996-1073/12/15/2875)
Supplement: s1 [file s1 › supplementary material/Plots/3/V1_Results_baseline_T_3D_2050.dat.pdf]

# V1\_Results\_baseline\_T\_3D\_2050.dat

# \*\*\* CASO: 1, IEA ; 2, Irena : 1

#n° de simulaciones = 100000

# \*\*\*\*\* Parámetros Wind \*\*\*\*\*

#medias ec. precio Turbinas : 2.9666 -0.1860  
 #dev. est. parámetros ec. precio Turbinas : 0.0000 0.0130  
 #dev. est. ec. precio Turbinas : 0.0900  
 #valor inicial en 2014 de Cap 340.6110  
 #depreciación, Performance Ratio, kgCO2 0.984 1.000 0.780  
 #Life Span de los Turbinas 27  
 #Social Discount Rate 0.022500 0.019286  
 #WACC, Loan Maturity 0.050 15  
 #Generación aleatoria de los parámetros = T  
 #Generación aleatoria de los errs. de las ecs. = T  
 #Storage costs tenido en cuenta = T  
 #Modelo Precio Turbinas (1, old; 2, simple; 3, LR dec.; 4, LR +dec. 2

# \*\*\*\*\* Parámetros PV \*\*\*\*\*

#medias ec. precio módulos : 3.6025 -0.3200  
 #dev. est. parámetros ec. precio módulos : 0.1710 0.0240  
 #dev. est. ec. precio módulos : 0.3300  
 #valores iniciales en 2014 de Cap, Pe, Pm, Ps, upm : 157.7609 0.8229 0.7050  
 0.0760 0.0000  
 #depreciación, Performance Ratio, kgCO2 : 0.990 0.850 0.780  
 #Life Span de los módulos : 30  
 #Social Discount Rate : 0.022500 0.019286  
 #WACC, Loan Maturity : 0.090 7  
 #Generación aleatoria de los parámetros = T  
 #Generación aleatoria de los errs. de las ecs. = T  
 #Storage costs tenido en cuenta = T  
 #Modelo Precio módulos (1, old; 2, simple; 3, LR dec.; 4, LR +dec. : 2

# V1\_Results\_baseline\_T\_3D\_2050.dat

```

#*****
#***  p.d.f. LCE (US$/MWh): TOTAL 2020, 2030, 2040 ,2050 (Smoothed, Not standardised) ***
#*****
#          2020          2030          2040          2050
#  *****      NOT standardised      *****
#  *****      adaptados para un plot en 3D con gnuplot      *****

#          2050

0.2335E+02  0.2363E-04  0.2050E+04  0x0000ff
0.2427E+02  0.7308E-04  0.2050E+04  0x0000ff
0.2519E+02  0.1648E-03  0.2050E+04  0x0000ff
0.2611E+02  0.3712E-03  0.2050E+04  0x0000ff
0.2703E+02  0.7539E-03  0.2050E+04  0x0000ff
0.2794E+02  0.1451E-02  0.2050E+04  0x0000ff
0.2886E+02  0.2813E-02  0.2050E+04  0x0000ff
0.2978E+02  0.4994E-02  0.2050E+04  0x0000ff
0.3070E+02  0.7921E-02  0.2050E+04  0x0000ff
0.3162E+02  0.1195E-01  0.2050E+04  0x0000ff
0.3254E+02  0.1712E-01  0.2050E+04  0x0000ff
0.3346E+02  0.2309E-01  0.2050E+04  0x0000ff
0.3438E+02  0.2953E-01  0.2050E+04  0x0000ff
0.3530E+02  0.3642E-01  0.2050E+04  0x0000ff
0.3622E+02  0.4280E-01  0.2050E+04  0x0000ff
0.3714E+02  0.4875E-01  0.2050E+04  0x0000ff
0.3806E+02  0.5379E-01  0.2050E+04  0x0000ff
0.3898E+02  0.5711E-01  0.2050E+04  0x0000ff
0.3990E+02  0.5929E-01  0.2050E+04  0x0000ff
0.4082E+02  0.6083E-01  0.2050E+04  0x0000ff
0.4174E+02  0.6120E-01  0.2050E+04  0x0000ff
0.4266E+02  0.6018E-01  0.2050E+04  0x0000ff
0.4358E+02  0.5806E-01  0.2050E+04  0x0000ff
0.4450E+02  0.5482E-01  0.2050E+04  0x0000ff
0.4542E+02  0.5066E-01  0.2050E+04  0x0000ff
0.4634E+02  0.4605E-01  0.2050E+04  0x0000ff

```

V1\_Results\_baseline\_T\_3D\_2050.dat

|            |            |            |          |
|------------|------------|------------|----------|
| 0.4726E+02 | 0.4183E-01 | 0.2050E+04 | 0x0000ff |
| 0.4818E+02 | 0.3750E-01 | 0.2050E+04 | 0x0000ff |
| 0.4910E+02 | 0.3304E-01 | 0.2050E+04 | 0x0000ff |
| 0.5001E+02 | 0.2884E-01 | 0.2050E+04 | 0x0000ff |
| 0.5093E+02 | 0.2544E-01 | 0.2050E+04 | 0x0000ff |
| 0.5185E+02 | 0.2188E-01 | 0.2050E+04 | 0x0000ff |
| 0.5277E+02 | 0.1844E-01 | 0.2050E+04 | 0x0000ff |
| 0.5369E+02 | 0.1552E-01 | 0.2050E+04 | 0x0000ff |
| 0.5461E+02 | 0.1308E-01 | 0.2050E+04 | 0x0000ff |
| 0.5553E+02 | 0.1116E-01 | 0.2050E+04 | 0x0000ff |
| 0.5645E+02 | 0.9316E-02 | 0.2050E+04 | 0x0000ff |
| 0.5737E+02 | 0.7512E-02 | 0.2050E+04 | 0x0000ff |
| 0.5829E+02 | 0.6018E-02 | 0.2050E+04 | 0x0000ff |
| 0.5921E+02 | 0.5076E-02 | 0.2050E+04 | 0x0000ff |
| 0.6013E+02 | 0.4300E-02 | 0.2050E+04 | 0x0000ff |
| 0.6105E+02 | 0.3492E-02 | 0.2050E+04 | 0x0000ff |
| 0.6197E+02 | 0.2746E-02 | 0.2050E+04 | 0x0000ff |
| 0.6289E+02 | 0.2190E-02 | 0.2050E+04 | 0x0000ff |
| 0.6381E+02 | 0.1806E-02 | 0.2050E+04 | 0x0000ff |
| 0.6473E+02 | 0.1532E-02 | 0.2050E+04 | 0x0000ff |
| 0.6565E+02 | 0.1241E-02 | 0.2050E+04 | 0x0000ff |
| 0.6657E+02 | 0.9513E-03 | 0.2050E+04 | 0x0000ff |
| 0.6749E+02 | 0.8151E-03 | 0.2050E+04 | 0x0000ff |
| 0.6841E+02 | 0.6942E-03 | 0.2050E+04 | 0x0000ff |
| 0.6933E+02 | 0.5236E-03 | 0.2050E+04 | 0x0000ff |
| 0.7025E+02 | 0.3854E-03 | 0.2050E+04 | 0x0000ff |
| 0.7116E+02 | 0.3332E-03 | 0.2050E+04 | 0x0000ff |
| 0.7208E+02 | 0.2866E-03 | 0.2050E+04 | 0x0000ff |
| 0.7300E+02 | 0.2419E-03 | 0.2050E+04 | 0x0000ff |
| 0.7392E+02 | 0.1763E-03 | 0.2050E+04 | 0x0000ff |
| 0.7484E+02 | 0.1410E-03 | 0.2050E+04 | 0x0000ff |
| 0.7576E+02 | 0.1231E-03 | 0.2050E+04 | 0x0000ff |
| 0.7668E+02 | 0.1081E-03 | 0.2050E+04 | 0x0000ff |
| 0.7760E+02 | 0.7838E-04 | 0.2050E+04 | 0x0000ff |
| 0.7852E+02 | 0.6136E-04 | 0.2050E+04 | 0x0000ff |
| 0.7944E+02 | 0.5206E-04 | 0.2050E+04 | 0x0000ff |

V1\_Results\_baseline\_T\_3D\_2050.dat

|            |            |            |          |
|------------|------------|------------|----------|
| 0.8036E+02 | 0.4453E-04 | 0.2050E+04 | 0x0000ff |
| 0.8128E+02 | 0.3392E-04 | 0.2050E+04 | 0x0000ff |
| 0.8220E+02 | 0.2822E-04 | 0.2050E+04 | 0x0000ff |
| 0.8312E+02 | 0.3663E-04 | 0.2050E+04 | 0x0000ff |
| 0.8404E+02 | 0.3679E-04 | 0.2050E+04 | 0x0000ff |
| 0.8496E+02 | 0.2695E-04 | 0.2050E+04 | 0x0000ff |
| 0.8588E+02 | 0.1443E-04 | 0.2050E+04 | 0x0000ff |
| 0.8680E+02 | 0.5570E-05 | 0.2050E+04 | 0x0000ff |
| 0.8772E+02 | 0.1751E-05 | 0.2050E+04 | 0x0000ff |
| 0.8864E+02 | 0.4451E-05 | 0.2050E+04 | 0x0000ff |
| 0.8956E+02 | 0.1838E-04 | 0.2050E+04 | 0x0000ff |
| 0.9048E+02 | 0.2521E-04 | 0.2050E+04 | 0x0000ff |
| 0.9140E+02 | 0.1794E-04 | 0.2050E+04 | 0x0000ff |
| 0.9232E+02 | 0.7989E-05 | 0.2050E+04 | 0x0000ff |
| 0.9323E+02 | 0.2946E-05 | 0.2050E+04 | 0x0000ff |
| 0.9415E+02 | 0.2351E-05 | 0.2050E+04 | 0x0000ff |
| 0.9507E+02 | 0.4502E-05 | 0.2050E+04 | 0x0000ff |
| 0.9599E+02 | 0.6583E-05 | 0.2050E+04 | 0x0000ff |
| 0.9691E+02 | 0.4672E-05 | 0.2050E+04 | 0x0000ff |
