# Supplementary material
Source: MDPI journal article supplement (https://www.mdpi.com/1996-1073/12/15/2875)
Supplement: s1 [file s1 › supplementary material/Plots/3/V1_Results_baseline_T_years.dat.pdf]

# V1\_Results\_baseline\_T\_years.dat

# \*\*\* CASO: 1, IEA ; 2, Irena : 1

#n° de simulaciones = 100000

# \*\*\*\*\* Parámetros Wind \*\*\*\*\*

#medias ec. precio Turbinas : 2.9666 -0.1860  
 #dev. est. parámetros ec. precio Turbinas : 0.0000 0.0130  
 #dev. est. ec. precio Turbinas : 0.0900  
 #valor inicial en 2014 de Cap 340.6110  
 #depreciación, Performance Ratio, kgCO2 0.984 1.000 0.780  
 #Life Span de los Turbinas 27  
 #Social Discount Rate 0.022500 0.019286  
 #WACC, Loan Maturity 0.050 15  
 #Generación aleatoria de los parámetros = T  
 #Generación aleatoria de los errs. de las ecs. = T  
 #Storage costs tenido en cuenta = T  
 #Modelo Precio Turbinas (1, old; 2, simple; 3, LR dec.; 4, LR +dec. 2

# \*\*\*\*\* Parámetros PV \*\*\*\*\*

#medias ec. precio módulos : 3.6025 -0.3200  
 #dev. est. parámetros ec. precio módulos : 0.1710 0.0240  
 #dev. est. ec. precio módulos : 0.3300  
 #valores iniciales en 2014 de Cap, Pe, Pm, Ps, upm : 157.7609 0.8229 0.7050  
 0.0760 0.0000  
 #depreciación, Performance Ratio, kgCO2 : 0.990 0.850 0.780  
 #Life Span de los módulos : 30  
 #Social Discount Rate : 0.022500 0.019286  
 #WACC, Loan Maturity : 0.090 7  
 #Generación aleatoria de los parámetros = T  
 #Generación aleatoria de los errs. de las ecs. = T  
 #Storage costs tenido en cuenta = T  
 #Modelo Precio módulos (1, old; 2, simple; 3, LR dec.; 4, LR +dec. : 2

# Vl\_Results\_baseline\_T\_years.dat

```

#*****
#***  p.d.f. LCE (US$/MWh): TOTAL 2020, 2030, 2040 ,2050 (Smoothed, Not standardised) ***
#*****
#          2020          2030          2040          2050

#  *****      NOT standardised      *****

-200  0.3905E+02  0.1162E-04  0.1323E+00  0.3994E-05  0.2543E+02  0.1213E-04  0.2335E+02
0.2363E-04
-195  0.4032E+02  0.2638E-04  0.1455E+01  0.1579E-05  0.2642E+02  0.1666E-04  0.2427E+02
0.7308E-04
-190  0.4159E+02  0.5030E-04  0.2778E+01  0.0000E+00  0.2741E+02  0.3412E-04  0.2519E+02
0.1648E-03
-185  0.4287E+02  0.1073E-03  0.4101E+01  0.0000E+00  0.2840E+02  0.1187E-03  0.2611E+02
0.3712E-03
-180  0.4414E+02  0.2534E-03  0.5424E+01  0.0000E+00  0.2938E+02  0.3373E-03  0.2703E+02
0.7539E-03
-175  0.4542E+02  0.5550E-03  0.6747E+01  0.0000E+00  0.3037E+02  0.7095E-03  0.2794E+02
0.1451E-02
-170  0.4669E+02  0.1011E-02  0.8070E+01  0.0000E+00  0.3136E+02  0.1453E-02  0.2886E+02
0.2813E-02
-165  0.4797E+02  0.1761E-02  0.9392E+01  0.0000E+00  0.3235E+02  0.2779E-02  0.2978E+02
0.4994E-02
-160  0.4924E+02  0.2989E-02  0.1072E+02  0.0000E+00  0.3334E+02  0.5010E-02  0.3070E+02
0.7921E-02
-155  0.5052E+02  0.4959E-02  0.1204E+02  0.0000E+00  0.3433E+02  0.7998E-02  0.3162E+02
0.1195E-01
-150  0.5179E+02  0.7458E-02  0.1336E+02  0.0000E+00  0.3532E+02  0.1178E-01  0.3254E+02
0.1712E-01
-145  0.5307E+02  0.1043E-01  0.1468E+02  0.0000E+00  0.3631E+02  0.1709E-01  0.3346E+02
0.2309E-01
-140  0.5434E+02  0.1401E-01  0.1601E+02  0.0000E+00  0.3730E+02  0.2368E-01  0.3438E+02
0.2953E-01
-135  0.5562E+02  0.1796E-01  0.1733E+02  0.0000E+00  0.3828E+02  0.3079E-01  0.3530E+02
0.3642E-01

```

| V1_Results_baseline_T_years.dat |            |            |            |            |            |            |            |
|---------------------------------|------------|------------|------------|------------|------------|------------|------------|
| -130                            | 0.5689E+02 | 0.2216E-01 | 0.1865E+02 | 0.0000E+00 | 0.3927E+02 | 0.3747E-01 | 0.3622E+02 |
| 0.4280E-01                      |            |            |            |            |            |            |            |
| -125                            | 0.5817E+02 | 0.2650E-01 | 0.1998E+02 | 0.0000E+00 | 0.4026E+02 | 0.4363E-01 | 0.3714E+02 |
| 0.4875E-01                      |            |            |            |            |            |            |            |
| -120                            | 0.5944E+02 | 0.3083E-01 | 0.2130E+02 | 0.0000E+00 | 0.4125E+02 | 0.4906E-01 | 0.3806E+02 |
| 0.5379E-01                      |            |            |            |            |            |            |            |
| -115                            | 0.6071E+02 | 0.3482E-01 | 0.2262E+02 | 0.0000E+00 | 0.4224E+02 | 0.5374E-01 | 0.3898E+02 |
| 0.5711E-01                      |            |            |            |            |            |            |            |
| -110                            | 0.6199E+02 | 0.3819E-01 | 0.2394E+02 | 0.0000E+00 | 0.4323E+02 | 0.5738E-01 | 0.3990E+02 |
| 0.5929E-01                      |            |            |            |            |            |            |            |
| -105                            | 0.6326E+02 | 0.4071E-01 | 0.2527E+02 | 0.0000E+00 | 0.4422E+02 | 0.5950E-01 | 0.4082E+02 |
| 0.6083E-01                      |            |            |            |            |            |            |            |
| -100                            | 0.6454E+02 | 0.4210E-01 | 0.2659E+02 | 0.0000E+00 | 0.4521E+02 | 0.6003E-01 | 0.4174E+02 |
| 0.6120E-01                      |            |            |            |            |            |            |            |
| -95                             | 0.6581E+02 | 0.4283E-01 | 0.2791E+02 | 0.0000E+00 | 0.4620E+02 | 0.5936E-01 | 0.4266E+02 |
| 0.6018E-01                      |            |            |            |            |            |            |            |
| -90                             | 0.6709E+02 | 0.4285E-01 | 0.2924E+02 | 0.6345E-05 | 0.4719E+02 | 0.5673E-01 | 0.4358E+02 |
| 0.5806E-01                      |            |            |            |            |            |            |            |
| -85                             | 0.6836E+02 | 0.4189E-01 | 0.3056E+02 | 0.1394E-04 | 0.4817E+02 | 0.5337E-01 | 0.4450E+02 |
| 0.5482E-01                      |            |            |            |            |            |            |            |
| -80                             | 0.6964E+02 | 0.3998E-01 | 0.3188E+02 | 0.5370E-04 | 0.4916E+02 | 0.4994E-01 | 0.4542E+02 |
| 0.5066E-01                      |            |            |            |            |            |            |            |
| -75                             | 0.7091E+02 | 0.3784E-01 | 0.3320E+02 | 0.2070E-03 | 0.5015E+02 | 0.4638E-01 | 0.4634E+02 |
| 0.4605E-01                      |            |            |            |            |            |            |            |
| -70                             | 0.7219E+02 | 0.3532E-01 | 0.3453E+02 | 0.5542E-03 | 0.5114E+02 | 0.4171E-01 | 0.4726E+02 |
| 0.4183E-01                      |            |            |            |            |            |            |            |
| -65                             | 0.7346E+02 | 0.3236E-01 | 0.3585E+02 | 0.1337E-02 | 0.5213E+02 | 0.3683E-01 | 0.4818E+02 |
| 0.3750E-01                      |            |            |            |            |            |            |            |
| -60                             | 0.7474E+02 | 0.2924E-01 | 0.3717E+02 | 0.2852E-02 | 0.5312E+02 | 0.3206E-01 | 0.4910E+02 |
| 0.3304E-01                      |            |            |            |            |            |            |            |
| -55                             | 0.7601E+02 | 0.2621E-01 | 0.3850E+02 | 0.5302E-02 | 0.5411E+02 | 0.2786E-01 | 0.5001E+02 |
| 0.2884E-01                      |            |            |            |            |            |            |            |
| -50                             | 0.7728E+02 | 0.2324E-01 | 0.3982E+02 | 0.9148E-02 | 0.5510E+02 | 0.2402E-01 | 0.5093E+02 |
| 0.2544E-01                      |            |            |            |            |            |            |            |
| -45                             | 0.7856E+02 | 0.2048E-01 | 0.4114E+02 | 0.1444E-01 | 0.5609E+02 | 0.2060E-01 | 0.5185E+02 |
| 0.2188E-01                      |            |            |            |            |            |            |            |

| V1_Results_baseline_T_years.dat |            |            |            |            |            |            |            |
|---------------------------------|------------|------------|------------|------------|------------|------------|------------|
| -40                             | 0.7983E+02 | 0.1789E-01 | 0.4246E+02 | 0.2038E-01 | 0.5707E+02 | 0.1761E-01 | 0.5277E+02 |
| 0.1844E-01                      |            |            |            |            |            |            |            |
| -35                             | 0.8111E+02 | 0.1566E-01 | 0.4379E+02 | 0.2710E-01 | 0.5806E+02 | 0.1499E-01 | 0.5369E+02 |
| 0.1552E-01                      |            |            |            |            |            |            |            |
| -30                             | 0.8238E+02 | 0.1349E-01 | 0.4511E+02 | 0.3445E-01 | 0.5905E+02 | 0.1261E-01 | 0.5461E+02 |
| 0.1308E-01                      |            |            |            |            |            |            |            |
| -25                             | 0.8366E+02 | 0.1149E-01 | 0.4643E+02 | 0.4108E-01 | 0.6004E+02 | 0.1020E-01 | 0.5553E+02 |
| 0.1116E-01                      |            |            |            |            |            |            |            |
| -20                             | 0.8493E+02 | 0.9748E-02 | 0.4776E+02 | 0.4641E-01 | 0.6103E+02 | 0.8363E-02 | 0.5645E+02 |
| 0.9316E-02                      |            |            |            |            |            |            |            |
| -15                             | 0.8621E+02 | 0.8374E-02 | 0.4908E+02 | 0.5069E-01 | 0.6202E+02 | 0.6906E-02 | 0.5737E+02 |
| 0.7512E-02                      |            |            |            |            |            |            |            |
| -10                             | 0.8748E+02 | 0.7107E-02 | 0.5040E+02 | 0.5327E-01 | 0.6301E+02 | 0.5576E-02 | 0.5829E+02 |
| 0.6018E-02                      |            |            |            |            |            |            |            |
| -5                              | 0.8876E+02 | 0.5819E-02 | 0.5172E+02 | 0.5360E-01 | 0.6400E+02 | 0.4428E-02 | 0.5921E+02 |
| 0.5076E-02                      |            |            |            |            |            |            |            |
| 0                               | 0.9003E+02 | 0.4714E-02 | 0.5305E+02 | 0.5162E-01 | 0.6499E+02 | 0.3775E-02 | 0.6013E+02 |
| 0.4300E-02                      |            |            |            |            |            |            |            |
| 5                               | 0.9131E+02 | 0.3759E-02 | 0.5437E+02 | 0.4885E-01 | 0.6597E+02 | 0.3108E-02 | 0.6105E+02 |
| 0.3492E-02                      |            |            |            |            |            |            |            |
| 10                              | 0.9258E+02 | 0.3125E-02 | 0.5569E+02 | 0.4556E-01 | 0.6696E+02 | 0.2431E-02 | 0.6197E+02 |
| 0.2746E-02                      |            |            |            |            |            |            |            |
| 15                              | 0.9386E+02 | 0.2592E-02 | 0.5702E+02 | 0.4069E-01 | 0.6795E+02 | 0.1890E-02 | 0.6289E+02 |
| 0.2190E-02                      |            |            |            |            |            |            |            |
| 20                              | 0.9513E+02 | 0.2133E-02 | 0.5834E+02 | 0.3581E-01 | 0.6894E+02 | 0.1507E-02 | 0.6381E+02 |
| 0.1806E-02                      |            |            |            |            |            |            |            |
| 25                              | 0.9640E+02 | 0.1738E-02 | 0.5966E+02 | 0.3159E-01 | 0.6993E+02 | 0.1300E-02 | 0.6473E+02 |
| 0.1532E-02                      |            |            |            |            |            |            |            |
| 30                              | 0.9768E+02 | 0.1425E-02 | 0.6098E+02 | 0.2759E-01 | 0.7092E+02 | 0.1074E-02 | 0.6565E+02 |
| 0.1241E-02                      |            |            |            |            |            |            |            |
| 35                              | 0.9895E+02 | 0.1159E-02 | 0.6231E+02 | 0.2309E-01 | 0.7191E+02 | 0.8073E-03 | 0.6657E+02 |
| 0.9513E-03                      |            |            |            |            |            |            |            |
| 40                              | 0.1002E+03 | 0.9389E-03 | 0.6363E+02 | 0.1856E-01 | 0.7290E+02 | 0.6160E-03 | 0.6749E+02 |
| 0.8151E-03                      |            |            |            |            |            |            |            |
| 45                              | 0.1015E+03 | 0.7484E-03 | 0.6495E+02 | 0.1507E-01 | 0.7389E+02 | 0.5094E-03 | 0.6841E+02 |
| 0.6942E-03                      |            |            |            |            |            |            |            |

| V1_Results_baseline_T_years.dat |            |            |            |            |            |            |            |
|---------------------------------|------------|------------|------------|------------|------------|------------|------------|
| 50                              | 0.1028E+03 | 0.5773E-03 | 0.6628E+02 | 0.1239E-01 | 0.7487E+02 | 0.4093E-03 | 0.6933E+02 |
| 0.5236E-03                      |            |            |            |            |            |            |            |
| 55                              | 0.1041E+03 | 0.4817E-03 | 0.6760E+02 | 0.9956E-02 | 0.7586E+02 | 0.2918E-03 | 0.7025E+02 |
| 0.3854E-03                      |            |            |            |            |            |            |            |
| 60                              | 0.1053E+03 | 0.4196E-03 | 0.6892E+02 | 0.7864E-02 | 0.7685E+02 | 0.2279E-03 | 0.7116E+02 |
| 0.3332E-03                      |            |            |            |            |            |            |            |
| 65                              | 0.1066E+03 | 0.3734E-03 | 0.7024E+02 | 0.6045E-02 | 0.7784E+02 | 0.1942E-03 | 0.7208E+02 |
| 0.2866E-03                      |            |            |            |            |            |            |            |
| 70                              | 0.1079E+03 | 0.3142E-03 | 0.7157E+02 | 0.4695E-02 | 0.7883E+02 | 0.1528E-03 | 0.7300E+02 |
| 0.2419E-03                      |            |            |            |            |            |            |            |
| 75                              | 0.1092E+03 | 0.2580E-03 | 0.7289E+02 | 0.3716E-02 | 0.7982E+02 | 0.1061E-03 | 0.7392E+02 |
| 0.1763E-03                      |            |            |            |            |            |            |            |
| 80                              | 0.1104E+03 | 0.1844E-03 | 0.7421E+02 | 0.2769E-02 | 0.8081E+02 | 0.8741E-04 | 0.7484E+02 |
| 0.1410E-03                      |            |            |            |            |            |            |            |
| 85                              | 0.1117E+03 | 0.1423E-03 | 0.7554E+02 | 0.2120E-02 | 0.8180E+02 | 0.8671E-04 | 0.7576E+02 |
| 0.1231E-03                      |            |            |            |            |            |            |            |
| 90                              | 0.1130E+03 | 0.1288E-03 | 0.7686E+02 | 0.1789E-02 | 0.8279E+02 | 0.7469E-04 | 0.7668E+02 |
| 0.1081E-03                      |            |            |            |            |            |            |            |
| 95                              | 0.1142E+03 | 0.1140E-03 | 0.7818E+02 | 0.1320E-02 | 0.8377E+02 | 0.5191E-04 | 0.7760E+02 |
| 0.7838E-04                      |            |            |            |            |            |            |            |
| 100                             | 0.1155E+03 | 0.7417E-04 | 0.7951E+02 | 0.8997E-03 | 0.8476E+02 | 0.4030E-04 | 0.7852E+02 |
| 0.6136E-04                      |            |            |            |            |            |            |            |
| 105                             | 0.1168E+03 | 0.4934E-04 | 0.8083E+02 | 0.7001E-03 | 0.8575E+02 | 0.4541E-04 | 0.7944E+02 |
| 0.5206E-04                      |            |            |            |            |            |            |            |
| 110                             | 0.1181E+03 | 0.5368E-04 | 0.8215E+02 | 0.5551E-03 | 0.8674E+02 | 0.3960E-04 | 0.8036E+02 |
| 0.4453E-04                      |            |            |            |            |            |            |            |
| 115                             | 0.1193E+03 | 0.5538E-04 | 0.8347E+02 | 0.4498E-03 | 0.8773E+02 | 0.2746E-04 | 0.8128E+02 |
| 0.3392E-04                      |            |            |            |            |            |            |            |
| 120                             | 0.1206E+03 | 0.4520E-04 | 0.8480E+02 | 0.3176E-03 | 0.8872E+02 | 0.3121E-04 | 0.8220E+02 |
| 0.2822E-04                      |            |            |            |            |            |            |            |
| 125                             | 0.1219E+03 | 0.2967E-04 | 0.8612E+02 | 0.2389E-03 | 0.8971E+02 | 0.2746E-04 | 0.8312E+02 |
| 0.3663E-04                      |            |            |            |            |            |            |            |
| 130                             | 0.1232E+03 | 0.2878E-04 | 0.8744E+02 | 0.2062E-03 | 0.9070E+02 | 0.2238E-04 | 0.8404E+02 |
| 0.3679E-04                      |            |            |            |            |            |            |            |
| 135                             | 0.1244E+03 | 0.3213E-04 | 0.8877E+02 | 0.1675E-03 | 0.9169E+02 | 0.1626E-04 | 0.8496E+02 |
| 0.2695E-04                      |            |            |            |            |            |            |            |

| V1_Results_baseline_T_years.dat |            |            |            |            |            |            |            |
|---------------------------------|------------|------------|------------|------------|------------|------------|------------|
| 140                             | 0.1257E+03 | 0.3075E-04 | 0.9009E+02 | 0.1179E-03 | 0.9268E+02 | 0.7868E-05 | 0.8588E+02 |
| 0.1443E-04                      |            |            |            |            |            |            |            |
| 145                             | 0.1270E+03 | 0.2186E-04 | 0.9141E+02 | 0.6334E-04 | 0.9366E+02 | 0.8113E-05 | 0.8680E+02 |
| 0.5570E-05                      |            |            |            |            |            |            |            |
| 150                             | 0.1283E+03 | 0.1365E-04 | 0.9273E+02 | 0.4650E-04 | 0.9465E+02 | 0.7188E-05 | 0.8772E+02 |
| 0.1751E-05                      |            |            |            |            |            |            |            |
| 155                             | 0.1295E+03 | 0.7433E-05 | 0.9406E+02 | 0.3120E-04 | 0.9564E+02 | 0.5624E-05 | 0.8864E+02 |
| 0.4451E-05                      |            |            |            |            |            |            |            |
| 160                             | 0.1308E+03 | 0.5058E-05 | 0.9538E+02 | 0.2884E-04 | 0.9663E+02 | 0.4352E-05 | 0.8956E+02 |
| 0.1838E-04                      |            |            |            |            |            |            |            |
| 165                             | 0.1321E+03 | 0.6038E-05 | 0.9670E+02 | 0.2381E-04 | 0.9762E+02 | 0.1936E-05 | 0.9048E+02 |
| 0.2521E-04                      |            |            |            |            |            |            |            |
| 170                             | 0.1334E+03 | 0.7800E-05 | 0.9803E+02 | 0.1614E-04 | 0.9861E+02 | 0.0000E+00 | 0.9140E+02 |
| 0.1794E-04                      |            |            |            |            |            |            |            |
| 175                             | 0.1346E+03 | 0.9623E-05 | 0.9935E+02 | 0.9988E-05 | 0.9960E+02 | 0.0000E+00 | 0.9232E+02 |
| 0.7989E-05                      |            |            |            |            |            |            |            |
| 180                             | 0.1359E+03 | 0.9168E-05 | 0.1007E+03 | 0.1216E-04 | 0.1006E+03 | 0.0000E+00 | 0.9323E+02 |
| 0.2946E-05                      |            |            |            |            |            |            |            |
| 185                             | 0.1372E+03 | 0.6874E-05 | 0.1020E+03 | 0.1504E-04 | 0.1016E+03 | 0.0000E+00 | 0.9415E+02 |
| 0.2351E-05                      |            |            |            |            |            |            |            |
| 190                             | 0.1385E+03 | 0.4445E-05 | 0.1033E+03 | 0.6079E-05 | 0.1026E+03 | 0.0000E+00 | 0.9507E+02 |
| 0.4502E-05                      |            |            |            |            |            |            |            |
| 195                             | 0.1397E+03 | 0.6752E-05 | 0.1046E+03 | 0.5488E-05 | 0.1036E+03 | 0.2591E-05 | 0.9599E+02 |
| 0.6583E-05                      |            |            |            |            |            |            |            |
| 200                             | 0.1410E+03 | 0.6061E-05 | 0.1060E+03 | 0.6813E-05 | 0.1045E+03 | 0.4456E-05 | 0.9691E+02 |
| 0.4672E-05                      |            |            |            |            |            |            |            |
