# Supplementary material
Source: MDPI journal article supplement (https://www.mdpi.com/1996-1073/12/15/2875)
Supplement: s1 [file s1 › supplementary material/Plots/Read me.docx]

*.txt: the *gnuplot* batch program.

*.dat: the data for the corresponding program and figure.

(26 files all).
