# Supplementary material
Source: MDPI journal article supplement (https://www.mdpi.com/1996-1073/12/15/2875)
Supplement: s1 [file s1 › supplementary material/Programs and data/A_Basic_data_PV.pdf]

| A_Basic_data_PV.dat |          |      |
|---------------------|----------|------|
| 0.990               | 0.85     | 0.78 |
| 0.022500            | 0.019286 |      |
| 0.09                | 7        |      |
| T                   |          |      |
| T                   |          | T    |
| 2                   |          |      |
| F                   |          |      |
