# Supplementary material
Source: MDPI journal article supplement (https://www.mdpi.com/1996-1073/12/15/2875)
Supplement: s1 [file s1 › supplementary material/Programs and data/A_IEA_PVRm_2050.pdf]

A\_IEA\_PVRm\_2050.dat

|      |          |
|------|----------|
| 2015 | 231.343  |
| 2016 | 291.045  |
| 2017 | 350.746  |
| 2018 | 418.657  |
| 2019 | 498.507  |
| 2020 | 585.075  |
| 2021 | 681.343  |
| 2022 | 785.075  |
| 2023 | 897.015  |
| 2024 | 1016.418 |
| 2025 | 1141.045 |
| 2026 | 1271.642 |
| 2027 | 1402.239 |
| 2028 | 1542.910 |
| 2029 | 1682.836 |
| 2030 | 1831.343 |
| 2031 | 1973.134 |
| 2032 | 2104.104 |
| 2033 | 2227.612 |
| 2034 | 2346.269 |
| 2035 | 2454.478 |
| 2036 | 2565.672 |
| 2037 | 2675.373 |
| 2038 | 2780.597 |
| 2039 | 2881.343 |
| 2040 | 2977.612 |
| 2041 | 3069.776 |
| 2042 | 3162.687 |
| 2043 | 3249.254 |
| 2044 | 3330.597 |
| 2045 | 3407.836 |
| 2046 | 3484.328 |
| 2047 | 3562.687 |
| 2048 | 3640.299 |
| 2049 | 3722.388 |
| 2050 | 3797.015 |
