# Supplementary material
Source: MDPI journal article supplement (https://www.mdpi.com/1996-1073/12/15/2875)
Supplement: s1 [file s1 › supplementary material/Programs and data/calc_sel.dat.pdf]

calc\_sel.dat

2  
T

T

T

T

T
