# Supplementary material
Source: MDPI journal article supplement (https://www.mdpi.com/1996-1073/12/15/2875)
Supplement: s1 [file s1 › supplementary material/Programs and data/Read me.docx]

Fortran programs:

Sim_PV_Wind_Irena_Iea_w1.f90: basic simulation.

Sim_PV_Wind_Irena_Iea_w2.f90: accelerated and delayed simulations.

Input data (depending on the case):

A_Basic_data_PV: basic PV data

A_IEA_PVRm_2050: IEA RM PV data.

A_Irena_PVRm_2050: Irena PV RM data.

Basic_data_wind: basic Wind data.

calc_sel: select accelerated or delayed deployments.

CW_historico_MW.dat: wind capacity, historic.

CWh_IEA_GW.dat: wind capacity IEA RM.

CWh_Irena_GW.dat: wind capacity Irena RM.

Results:

V1*: results for the IEA and Irena baseline cases.

V2*: results for the IEA and Irena accelerated and delayed cases.
