# Supplementary material
Source: MDPI journal article supplement (https://www.mdpi.com/1996-1073/12/15/2875)
Supplement: s1 [file s1 › supplementary material/Programs and data/V1_Results_baseline_Irena.pdf]

# V1\_Results\_baseline\_Irena.dat

# \*\*\* CASO: 1, IEA ; 2, Irena : 2

#n° de simulaciones = 100000

# \*\*\*\*\* Parámetros Wind \*\*\*\*\*

#medias ec. precio Turbinas : 2.9666 -0.1860  
 #dev. est. parámetros ec. precio Turbinas : 0.0000 0.0130  
 #dev. est. ec. precio Turbinas : 0.0900  
 #valor inicial en 2014 de Cap 340.6110  
 #depreciación, Performance Ratio, kgCO2 0.984 1.000 0.780  
 #Life Span de los Turbinas 27  
 #Social Discount Rate 0.022500 0.019286  
 #WACC, Loan Maturity 0.050 15  
 #Generación aleatoria de los parámetros = T  
 #Generación aleatoria de los errs. de las ecs. = T  
 #Storage costs tenido en cuenta = T  
 #Modelo Precio Turbinas (1, old; 2, simple; 3, LR dec.; 4, LR +dec. 2

# \*\*\*\*\* Parámetros PV \*\*\*\*\*

#medias ec. precio módulos : 3.6025 -0.3200  
 #dev. est. parámetros ec. precio módulos : 0.1710 0.0240  
 #dev. est. ec. precio módulos : 0.3300  
 #valores iniciales en 2014 de Cap, Pe, Pm, Ps, upm : 157.7609 0.8229 0.7050  
 0.0760 0.0000  
 #depreciación, Performance Ratio, kgCO2 : 0.990 0.850 0.780  
 #Life Span de los módulos : 30  
 #Social Discount Rate : 0.022500 0.019286  
 #WACC, Loan Maturity : 0.090 7  
 #Generación aleatoria de los parámetros = T  
 #Generación aleatoria de los errs. de las ecs. = T  
 #Storage costs tenido en cuenta = T  
 #Modelo Precio módulos (1, old; 2, simple; 3, LR dec.; 4, LR +dec. : 2

# Vl\_Results\_baseline\_Irena.dat

\*\*\*\*\*  
 \*\*\*\*\* ENERGY GENERATED \*\*\*\*\*  
 \*\*\*\*\*

Total, PV, Wind: 0.36206E+12 0.17355E+12 0.18851E+12  
 PV(%), Wind(%): 0.479332 0.520668

#\*\*\*\*\*  
 #\*\*\*\*\* ANNUAL LCE (means; US \$ per Mwh.) \*\*\*\*\*  
 #\*\*\*\*\*

| #    | Total       | PV          | Wind        |
|------|-------------|-------------|-------------|
| 2015 | 0.83597E+02 | 0.84012E+02 | 0.83304E+02 |
| 2016 | 0.76503E+02 | 0.74626E+02 | 0.78043E+02 |
| 2017 | 0.71887E+02 | 0.69033E+02 | 0.74269E+02 |
| 2018 | 0.68400E+02 | 0.64923E+02 | 0.71354E+02 |
| 2019 | 0.65585E+02 | 0.61673E+02 | 0.68963E+02 |
| 2020 | 0.63193E+02 | 0.58950E+02 | 0.66918E+02 |
| 2021 | 0.61204E+02 | 0.56603E+02 | 0.65312E+02 |
| 2022 | 0.59306E+02 | 0.54462E+02 | 0.63683E+02 |
| 2023 | 0.57696E+02 | 0.52612E+02 | 0.62367E+02 |
| 2024 | 0.56227E+02 | 0.50956E+02 | 0.61144E+02 |
| 2025 | 0.54874E+02 | 0.49381E+02 | 0.60044E+02 |
| 2026 | 0.53701E+02 | 0.48009E+02 | 0.59123E+02 |
| 2027 | 0.52589E+02 | 0.46709E+02 | 0.58279E+02 |
| 2028 | 0.51642E+02 | 0.45566E+02 | 0.57469E+02 |
| 2029 | 0.50835E+02 | 0.44521E+02 | 0.56999E+02 |
| 2030 | 0.49954E+02 | 0.43696E+02 | 0.56117E+02 |
| 2031 | 0.49274E+02 | 0.42895E+02 | 0.55600E+02 |
| 2032 | 0.48571E+02 | 0.42024E+02 | 0.55090E+02 |
| 2033 | 0.47736E+02 | 0.41294E+02 | 0.54071E+02 |
| 2034 | 0.47152E+02 | 0.40384E+02 | 0.53744E+02 |
| 2035 | 0.47168E+02 | 0.40402E+02 | 0.53637E+02 |
| 2036 | 0.48503E+02 | 0.41884E+02 | 0.54495E+02 |

V1\_Results\_baseline\_Irena.dat

|      |             |             |             |
|------|-------------|-------------|-------------|
| 2037 | 0.47638E+02 | 0.40904E+02 | 0.54041E+02 |
| 2038 | 0.46827E+02 | 0.39897E+02 | 0.53216E+02 |
| 2039 | 0.46003E+02 | 0.38906E+02 | 0.52431E+02 |
| 2040 | 0.44807E+02 | 0.37772E+02 | 0.52288E+02 |
| 2041 | 0.44083E+02 | 0.36773E+02 | 0.51345E+02 |
| 2042 | 0.43625E+02 | 0.35944E+02 | 0.50223E+02 |
| 2043 | 0.43608E+02 | 0.35029E+02 | 0.48714E+02 |
| 2044 | 0.42999E+02 | 0.34269E+02 | 0.48304E+02 |
| 2045 | 0.42814E+02 | 0.33707E+02 | 0.49499E+02 |
| 2046 | 0.40280E+02 | 0.32028E+02 | 0.49262E+02 |
| 2047 | 0.39835E+02 | 0.31517E+02 | 0.49039E+02 |
| 2048 | 0.39422E+02 | 0.31046E+02 | 0.48851E+02 |
| 2049 | 0.39043E+02 | 0.30595E+02 | 0.48693E+02 |
| 2050 | 0.38600E+02 | 0.30175E+02 | 0.48399E+02 |

#####  
 #\*\*\*\*\* TOTAL, PV & WIND, LCE (US\$/MWh): SUMMARY STATISTICS \*\*\*\*\*  
 #\*\*\*\*\*

\*\*\*\*\* Wind \*\*\*\*\*

MEAN, VARIANCE, SKW, KURT & MAX. VALUES 50%, 80%, 90%, 95%

0.581E+02 0.108E+03 0.589E+00 0.366E+01 0.570E+02 0.662E+02 0.715E+02 0.763E+02

LCE EXPECT. / ( LCE > LCE max. at 80%, 90%, 95%)

0.7403E+02 0.7900E+02 0.8401E+02

\*\*\*\*\* PV \*\*\*\*\*

MEAN, VARIANCE, SKW, KURT & MAX. VALUES 50%, 80%, 90%, 95%

# Vl\_Results\_baseline\_Irena.dat

0.456E+02 0.531E+02 0.126E+01 0.588E+01 0.442E+02 0.507E+02 0.550E+02 0.592E+02

LCE EXPECT. / ( LCE > LCE max. al 80%, 90%, 95%)

0.5679E+02 0.6134E+02 0.6540E+02

\*\*\*\*\* Total \*\*\*\*\*

MEAN, VARIANCE, SKW, KURT & MAX. VALUES 50%, 80%, 90%, 95%

0.521E+02 0.413E+02 0.542E+00 0.359E+01 0.514E+02 0.572E+02 0.604E+02 0.634E+02

LCE EXPECT. / ( LCE > LCE max. al 80%, 90%, 95%)

0.6144E+02 0.6523E+02 0.6651E+02

#\*\*\*\*\*  
#\*\*\*\*\* TOTAL LCE (US\$/MWh): SUMMARY STATISTICS; ALL YEARS: 2015 - 2050 \*\*\*\*\*  
#\*\*\*\*\*

# MEAN, VARIANCE, SKW, KURT, INT: 2.5%, 50%, 80%, 90%, 95%, 97.5%

|   |           |           |           |           |           |           |           |           |
|---|-----------|-----------|-----------|-----------|-----------|-----------|-----------|-----------|
| 1 | 0.836E+02 | 0.142E+03 | 0.739E+00 | 0.427E+01 | 0.637E+02 | 0.823E+02 | 0.928E+02 | 0.991E+02 |
|   | 0.105E+03 | 0.110E+03 |           |           |           |           |           |           |
| 2 | 0.765E+02 | 0.116E+03 | 0.763E+00 | 0.435E+01 | 0.587E+02 | 0.752E+02 | 0.847E+02 | 0.905E+02 |
|   | 0.957E+02 | 0.101E+03 |           |           |           |           |           |           |
| 3 | 0.719E+02 | 0.102E+03 | 0.754E+00 | 0.431E+01 | 0.552E+02 | 0.707E+02 | 0.795E+02 | 0.849E+02 |
|   | 0.899E+02 | 0.947E+02 |           |           |           |           |           |           |
| 4 | 0.684E+02 | 0.910E+02 | 0.732E+00 | 0.423E+01 | 0.526E+02 | 0.672E+02 | 0.757E+02 | 0.807E+02 |
|   | 0.853E+02 | 0.896E+02 |           |           |           |           |           |           |
| 5 | 0.656E+02 | 0.837E+02 | 0.757E+00 | 0.440E+01 | 0.505E+02 | 0.644E+02 | 0.726E+02 | 0.774E+02 |

# Vl\_Results\_baseline\_Irena.dat

|           |           |           |           |           |           |           |           |           |  |
|-----------|-----------|-----------|-----------|-----------|-----------|-----------|-----------|-----------|--|
| 0.819E+02 | 0.861E+02 |           |           |           |           |           |           |           |  |
| 6         | 0.632E+02 | 0.781E+02 | 0.733E+00 | 0.422E+01 | 0.486E+02 | 0.622E+02 | 0.700E+02 | 0.746E+02 |  |
| 0.789E+02 | 0.828E+02 |           |           |           |           |           |           |           |  |
| 7         | 0.612E+02 | 0.740E+02 | 0.757E+00 | 0.433E+01 | 0.470E+02 | 0.601E+02 | 0.678E+02 | 0.723E+02 |  |
| 0.765E+02 | 0.807E+02 |           |           |           |           |           |           |           |  |
| 8         | 0.593E+02 | 0.691E+02 | 0.748E+00 | 0.423E+01 | 0.457E+02 | 0.583E+02 | 0.657E+02 | 0.701E+02 |  |
| 0.741E+02 | 0.780E+02 |           |           |           |           |           |           |           |  |
| 9         | 0.577E+02 | 0.664E+02 | 0.761E+00 | 0.436E+01 | 0.442E+02 | 0.566E+02 | 0.640E+02 | 0.682E+02 |  |
| 0.722E+02 | 0.760E+02 |           |           |           |           |           |           |           |  |
| 10        | 0.562E+02 | 0.634E+02 | 0.772E+00 | 0.441E+01 | 0.431E+02 | 0.552E+02 | 0.623E+02 | 0.664E+02 |  |
| 0.705E+02 | 0.742E+02 |           |           |           |           |           |           |           |  |
| 11        | 0.549E+02 | 0.604E+02 | 0.730E+00 | 0.420E+01 | 0.420E+02 | 0.540E+02 | 0.608E+02 | 0.649E+02 |  |
| 0.686E+02 | 0.722E+02 |           |           |           |           |           |           |           |  |
| 12        | 0.537E+02 | 0.588E+02 | 0.749E+00 | 0.421E+01 | 0.411E+02 | 0.528E+02 | 0.595E+02 | 0.636E+02 |  |
| 0.675E+02 | 0.710E+02 |           |           |           |           |           |           |           |  |
| 13        | 0.526E+02 | 0.564E+02 | 0.737E+00 | 0.416E+01 | 0.402E+02 | 0.516E+02 | 0.583E+02 | 0.623E+02 |  |
| 0.660E+02 | 0.694E+02 |           |           |           |           |           |           |           |  |
| 14        | 0.516E+02 | 0.548E+02 | 0.728E+00 | 0.414E+01 | 0.395E+02 | 0.508E+02 | 0.574E+02 | 0.612E+02 |  |
| 0.648E+02 | 0.683E+02 |           |           |           |           |           |           |           |  |
| 15        | 0.508E+02 | 0.535E+02 | 0.753E+00 | 0.423E+01 | 0.389E+02 | 0.499E+02 | 0.565E+02 | 0.603E+02 |  |
| 0.639E+02 | 0.673E+02 |           |           |           |           |           |           |           |  |
| 16        | 0.500E+02 | 0.511E+02 | 0.724E+00 | 0.415E+01 | 0.381E+02 | 0.490E+02 | 0.554E+02 | 0.591E+02 |  |
| 0.627E+02 | 0.661E+02 |           |           |           |           |           |           |           |  |
| 17        | 0.493E+02 | 0.504E+02 | 0.737E+00 | 0.416E+01 | 0.376E+02 | 0.485E+02 | 0.547E+02 | 0.585E+02 |  |
| 0.620E+02 | 0.653E+02 |           |           |           |           |           |           |           |  |
| 18        | 0.486E+02 | 0.494E+02 | 0.740E+00 | 0.423E+01 | 0.369E+02 | 0.477E+02 | 0.540E+02 | 0.576E+02 |  |
| 0.611E+02 | 0.644E+02 |           |           |           |           |           |           |           |  |
| 19        | 0.477E+02 | 0.485E+02 | 0.730E+00 | 0.418E+01 | 0.361E+02 | 0.468E+02 | 0.531E+02 | 0.568E+02 |  |
| 0.601E+02 | 0.634E+02 |           |           |           |           |           |           |           |  |
| 20        | 0.472E+02 | 0.475E+02 | 0.708E+00 | 0.404E+01 | 0.357E+02 | 0.463E+02 | 0.524E+02 | 0.562E+02 |  |
| 0.595E+02 | 0.626E+02 |           |           |           |           |           |           |           |  |
| 21        | 0.472E+02 | 0.470E+02 | 0.723E+00 | 0.418E+01 | 0.359E+02 | 0.463E+02 | 0.525E+02 | 0.560E+02 |  |
| 0.594E+02 | 0.625E+02 |           |           |           |           |           |           |           |  |
| 22        | 0.485E+02 | 0.467E+02 | 0.686E+00 | 0.396E+01 | 0.372E+02 | 0.477E+02 | 0.538E+02 | 0.573E+02 |  |
| 0.606E+02 | 0.637E+02 |           |           |           |           |           |           |           |  |
| 23        | 0.476E+02 | 0.456E+02 | 0.739E+00 | 0.430E+01 | 0.365E+02 | 0.468E+02 | 0.527E+02 | 0.563E+02 |  |

# Vl\_Results\_baseline\_Irena.dat

|           |           |           |           |           |           |           |           |           |  |
|-----------|-----------|-----------|-----------|-----------|-----------|-----------|-----------|-----------|--|
| 0.596E+02 | 0.626E+02 |           |           |           |           |           |           |           |  |
| 24        | 0.468E+02 | 0.451E+02 | 0.684E+00 | 0.395E+01 | 0.357E+02 | 0.460E+02 | 0.521E+02 | 0.555E+02 |  |
| 0.589E+02 | 0.620E+02 |           |           |           |           |           |           |           |  |
| 25        | 0.460E+02 | 0.446E+02 | 0.692E+00 | 0.397E+01 | 0.349E+02 | 0.452E+02 | 0.511E+02 | 0.547E+02 |  |
| 0.579E+02 | 0.611E+02 |           |           |           |           |           |           |           |  |
| 26        | 0.448E+02 | 0.419E+02 | 0.751E+00 | 0.422E+01 | 0.342E+02 | 0.440E+02 | 0.497E+02 | 0.531E+02 |  |
| 0.563E+02 | 0.593E+02 |           |           |           |           |           |           |           |  |
| 27        | 0.441E+02 | 0.420E+02 | 0.717E+00 | 0.412E+01 | 0.333E+02 | 0.433E+02 | 0.490E+02 | 0.524E+02 |  |
| 0.556E+02 | 0.585E+02 |           |           |           |           |           |           |           |  |
| 28        | 0.436E+02 | 0.435E+02 | 0.681E+00 | 0.396E+01 | 0.327E+02 | 0.429E+02 | 0.487E+02 | 0.522E+02 |  |
| 0.554E+02 | 0.583E+02 |           |           |           |           |           |           |           |  |
| 29        | 0.436E+02 | 0.499E+02 | 0.665E+00 | 0.395E+01 | 0.319E+02 | 0.428E+02 | 0.491E+02 | 0.528E+02 |  |
| 0.563E+02 | 0.592E+02 |           |           |           |           |           |           |           |  |
| 30        | 0.430E+02 | 0.485E+02 | 0.646E+00 | 0.382E+01 | 0.313E+02 | 0.423E+02 | 0.484E+02 | 0.521E+02 |  |
| 0.554E+02 | 0.585E+02 |           |           |           |           |           |           |           |  |
| 31        | 0.428E+02 | 0.469E+02 | 0.644E+00 | 0.378E+01 | 0.314E+02 | 0.421E+02 | 0.481E+02 | 0.518E+02 |  |
| 0.550E+02 | 0.581E+02 |           |           |           |           |           |           |           |  |
| 32        | 0.403E+02 | 0.404E+02 | 0.773E+00 | 0.454E+01 | 0.299E+02 | 0.395E+02 | 0.452E+02 | 0.485E+02 |  |
| 0.516E+02 | 0.546E+02 |           |           |           |           |           |           |           |  |
| 33        | 0.398E+02 | 0.399E+02 | 0.767E+00 | 0.432E+01 | 0.294E+02 | 0.390E+02 | 0.446E+02 | 0.480E+02 |  |
| 0.511E+02 | 0.540E+02 |           |           |           |           |           |           |           |  |
| 34        | 0.394E+02 | 0.395E+02 | 0.778E+00 | 0.439E+01 | 0.291E+02 | 0.386E+02 | 0.441E+02 | 0.476E+02 |  |
| 0.507E+02 | 0.535E+02 |           |           |           |           |           |           |           |  |
| 35        | 0.390E+02 | 0.390E+02 | 0.786E+00 | 0.445E+01 | 0.288E+02 | 0.382E+02 | 0.437E+02 | 0.472E+02 |  |
| 0.501E+02 | 0.530E+02 |           |           |           |           |           |           |           |  |
| 36        | 0.386E+02 | 0.383E+02 | 0.784E+00 | 0.441E+01 | 0.285E+02 | 0.378E+02 | 0.433E+02 | 0.467E+02 |  |
| 0.496E+02 | 0.525E+02 |           |           |           |           |           |           |           |  |

```

*****
# p.d.f. & C.d.f LCE (US$/MWh): TOTAL, PV, WIND (Smoothed, NOT standardised)
#*****
#
#           Total           PV           Wind
#
# ***** NOT standardised *****

```

V1\_Results\_baseline\_Irena.dat

|            |            |            |            |            |            |            |            |
|------------|------------|------------|------------|------------|------------|------------|------------|
| -200       | 0.3059E+02 | 0.4910E-05 | 0.7832E-06 | 0.1346E+00 | 0.8640E-05 | 0.2326E-05 | 0.2668E+02 |
| 0.7389E-05 | 0.1829E-05 |            |            |            |            |            |            |
| -195       | 0.3139E+02 | 0.1065E-04 | 0.6973E-05 | 0.1480E+01 | 0.2294E-05 | 0.9968E-05 | 0.2792E+02 |
| 0.1834E-04 | 0.1879E-04 |            |            |            |            |            |            |
| -190       | 0.3219E+02 | 0.3278E-04 | 0.2522E-04 | 0.2826E+01 | 0.0000E+00 | 0.9968E-05 | 0.2916E+02 |
| 0.5158E-04 | 0.6292E-04 |            |            |            |            |            |            |
| -185       | 0.3298E+02 | 0.5310E-04 | 0.6216E-04 | 0.4172E+01 | 0.0000E+00 | 0.9968E-05 | 0.3040E+02 |
| 0.1270E-03 | 0.1772E-03 |            |            |            |            |            |            |
| -180       | 0.3378E+02 | 0.8904E-04 | 0.1184E-03 | 0.5518E+01 | 0.0000E+00 | 0.9968E-05 | 0.3164E+02 |
| 0.2921E-03 | 0.4477E-03 |            |            |            |            |            |            |
| -175       | 0.3458E+02 | 0.1864E-03 | 0.2305E-03 | 0.6864E+01 | 0.0000E+00 | 0.9968E-05 | 0.3287E+02 |
| 0.5521E-03 | 0.9912E-03 |            |            |            |            |            |            |
| -170       | 0.3538E+02 | 0.4322E-03 | 0.4888E-03 | 0.8210E+01 | 0.0000E+00 | 0.9968E-05 | 0.3411E+02 |
| 0.9425E-03 | 0.1950E-02 |            |            |            |            |            |            |
| -165       | 0.3617E+02 | 0.7806E-03 | 0.9922E-03 | 0.9556E+01 | 0.0000E+00 | 0.9968E-05 | 0.3535E+02 |
| 0.1598E-02 | 0.3572E-02 |            |            |            |            |            |            |
| -160       | 0.3697E+02 | 0.1392E-02 | 0.1884E-02 | 0.1090E+02 | 0.0000E+00 | 0.9968E-05 | 0.3659E+02 |
| 0.2544E-02 | 0.6212E-02 |            |            |            |            |            |            |
| -155       | 0.3777E+02 | 0.2385E-02 | 0.3431E-02 | 0.1225E+02 | 0.0000E+00 | 0.9968E-05 | 0.3783E+02 |
| 0.3910E-02 | 0.1034E-01 |            |            |            |            |            |            |
| -150       | 0.3857E+02 | 0.3946E-02 | 0.6047E-02 | 0.1359E+02 | 0.0000E+00 | 0.9968E-05 | 0.3906E+02 |
| 0.5637E-02 | 0.1643E-01 |            |            |            |            |            |            |
| -145       | 0.3936E+02 | 0.6109E-02 | 0.1018E-01 | 0.1494E+02 | 0.0000E+00 | 0.9968E-05 | 0.4030E+02 |
| 0.7858E-02 | 0.2501E-01 |            |            |            |            |            |            |
| -140       | 0.4016E+02 | 0.8997E-02 | 0.1640E-01 | 0.1629E+02 | 0.0000E+00 | 0.9968E-05 | 0.4154E+02 |
| 0.1043E-01 | 0.3659E-01 |            |            |            |            |            |            |
| -135       | 0.4096E+02 | 0.1262E-01 | 0.2524E-01 | 0.1763E+02 | 0.0000E+00 | 0.9968E-05 | 0.4278E+02 |
| 0.1356E-01 | 0.5178E-01 |            |            |            |            |            |            |
| -130       | 0.4176E+02 | 0.1694E-01 | 0.3733E-01 | 0.1898E+02 | 0.0000E+00 | 0.9968E-05 | 0.4401E+02 |
| 0.1725E-01 | 0.7125E-01 |            |            |            |            |            |            |
| -125       | 0.4255E+02 | 0.2210E-01 | 0.5324E-01 | 0.2032E+02 | 0.0000E+00 | 0.9968E-05 | 0.4525E+02 |
| 0.2126E-01 | 0.9558E-01 |            |            |            |            |            |            |
| -120       | 0.4335E+02 | 0.2766E-01 | 0.7351E-01 | 0.2167E+02 | 0.0000E+00 | 0.9968E-05 | 0.4649E+02 |
| 0.2524E-01 | 0.1249E+00 |            |            |            |            |            |            |
| -115       | 0.4415E+02 | 0.3383E-01 | 0.9847E-01 | 0.2301E+02 | 0.0000E+00 | 0.9968E-05 | 0.4773E+02 |
| 0.2892E-01 | 0.1589E+00 |            |            |            |            |            |            |

V1\_Results\_baseline\_Irena.dat

|            |            |            |            |            |            |            |            |
|------------|------------|------------|------------|------------|------------|------------|------------|
| -110       | 0.4495E+02 | 0.3999E-01 | 0.1284E+00 | 0.2436E+02 | 0.0000E+00 | 0.9968E-05 | 0.4897E+02 |
| 0.3196E-01 | 0.1970E+00 |            |            |            |            |            |            |
| -105       | 0.4574E+02 | 0.4598E-01 | 0.1632E+00 | 0.2571E+02 | 0.0000E+00 | 0.9968E-05 | 0.5020E+02 |
| 0.3460E-01 | 0.2386E+00 |            |            |            |            |            |            |
| -100       | 0.4654E+02 | 0.5129E-01 | 0.2024E+00 | 0.2705E+02 | 0.0000E+00 | 0.9968E-05 | 0.5144E+02 |
| 0.3661E-01 | 0.2830E+00 |            |            |            |            |            |            |
| -95        | 0.4734E+02 | 0.5583E-01 | 0.2456E+00 | 0.2840E+02 | 0.0000E+00 | 0.9968E-05 | 0.5268E+02 |
| 0.3810E-01 | 0.3294E+00 |            |            |            |            |            |            |
| -90        | 0.4814E+02 | 0.5925E-01 | 0.2918E+00 | 0.2974E+02 | 0.1778E-04 | 0.1563E-04 | 0.5392E+02 |
| 0.3925E-01 | 0.3774E+00 |            |            |            |            |            |            |
| -85        | 0.4893E+02 | 0.6150E-01 | 0.3402E+00 | 0.3109E+02 | 0.3196E-03 | 0.2272E-03 | 0.5516E+02 |
| 0.4013E-01 | 0.4268E+00 |            |            |            |            |            |            |
| -80        | 0.4973E+02 | 0.6307E-01 | 0.3900E+00 | 0.3244E+02 | 0.2084E-02 | 0.1783E-02 | 0.5639E+02 |
| 0.4013E-01 | 0.4765E+00 |            |            |            |            |            |            |
| -75        | 0.5053E+02 | 0.6366E-01 | 0.4407E+00 | 0.3378E+02 | 0.7613E-02 | 0.8551E-02 | 0.5763E+02 |
| 0.3910E-01 | 0.5255E+00 |            |            |            |            |            |            |
| -70        | 0.5133E+02 | 0.6341E-01 | 0.4914E+00 | 0.3513E+02 | 0.1763E-01 | 0.2646E-01 | 0.5887E+02 |
| 0.3748E-01 | 0.5727E+00 |            |            |            |            |            |            |
| -65        | 0.5212E+02 | 0.6171E-01 | 0.5412E+00 | 0.3647E+02 | 0.3134E-01 | 0.6104E-01 | 0.6011E+02 |
| 0.3565E-01 | 0.6178E+00 |            |            |            |            |            |            |
| -60        | 0.5292E+02 | 0.5924E-01 | 0.5893E+00 | 0.3782E+02 | 0.4535E-01 | 0.1147E+00 | 0.6135E+02 |
| 0.3356E-01 | 0.6604E+00 |            |            |            |            |            |            |
| -55        | 0.5372E+02 | 0.5619E-01 | 0.6351E+00 | 0.3917E+02 | 0.5654E-01 | 0.1852E+00 | 0.6258E+02 |
| 0.3110E-01 | 0.7002E+00 |            |            |            |            |            |            |
| -50        | 0.5452E+02 | 0.5260E-01 | 0.6782E+00 | 0.4051E+02 | 0.6346E-01 | 0.2675E+00 | 0.6382E+02 |
| 0.2863E-01 | 0.7368E+00 |            |            |            |            |            |            |
| -45        | 0.5531E+02 | 0.4880E-01 | 0.7183E+00 | 0.4186E+02 | 0.6521E-01 | 0.3549E+00 | 0.6506E+02 |
| 0.2614E-01 | 0.7704E+00 |            |            |            |            |            |            |
| -40        | 0.5611E+02 | 0.4489E-01 | 0.7553E+00 | 0.4320E+02 | 0.6329E-01 | 0.4413E+00 | 0.6630E+02 |
| 0.2390E-01 | 0.8011E+00 |            |            |            |            |            |            |
| -35        | 0.5691E+02 | 0.4112E-01 | 0.7894E+00 | 0.4455E+02 | 0.5958E-01 | 0.5237E+00 | 0.6753E+02 |
| 0.2139E-01 | 0.8288E+00 |            |            |            |            |            |            |
| -30        | 0.5771E+02 | 0.3657E-01 | 0.8200E+00 | 0.4589E+02 | 0.5392E-01 | 0.5995E+00 | 0.6877E+02 |
| 0.1895E-01 | 0.8535E+00 |            |            |            |            |            |            |
| -25        | 0.5850E+02 | 0.3218E-01 | 0.8471E+00 | 0.4724E+02 | 0.4739E-01 | 0.6667E+00 | 0.7001E+02 |
| 0.1662E-01 | 0.8752E+00 |            |            |            |            |            |            |

V1\_Results\_baseline\_Irena.dat

|            |            |            |            |            |            |            |            |
|------------|------------|------------|------------|------------|------------|------------|------------|
| -20        | 0.5930E+02 | 0.2806E-01 | 0.8707E+00 | 0.4859E+02 | 0.4158E-01 | 0.7258E+00 | 0.7125E+02 |
| 0.1452E-01 | 0.8942E+00 |            |            |            |            |            |            |
| -15        | 0.6010E+02 | 0.2465E-01 | 0.8914E+00 | 0.4993E+02 | 0.3517E-01 | 0.7768E+00 | 0.7249E+02 |
| 0.1265E-01 | 0.9108E+00 |            |            |            |            |            |            |
| -10        | 0.6089E+02 | 0.2116E-01 | 0.9094E+00 | 0.5128E+02 | 0.2881E-01 | 0.8188E+00 | 0.7372E+02 |
| 0.1091E-01 | 0.9251E+00 |            |            |            |            |            |            |
| -5         | 0.6169E+02 | 0.1791E-01 | 0.9247E+00 | 0.5262E+02 | 0.2383E-01 | 0.8534E+00 | 0.7496E+02 |
| 0.9373E-02 | 0.9375E+00 |            |            |            |            |            |            |
| 0          | 0.6249E+02 | 0.1501E-01 | 0.9376E+00 | 0.5397E+02 | 0.1961E-01 | 0.8820E+00 | 0.7620E+02 |
| 0.7935E-02 | 0.9480E+00 |            |            |            |            |            |            |
| 5          | 0.6329E+02 | 0.1277E-01 | 0.9484E+00 | 0.5532E+02 | 0.1569E-01 | 0.9052E+00 | 0.7744E+02 |
| 0.6614E-02 | 0.9568E+00 |            |            |            |            |            |            |
| 10         | 0.6408E+02 | 0.1072E-01 | 0.9576E+00 | 0.5666E+02 | 0.1270E-01 | 0.9238E+00 | 0.7868E+02 |
| 0.5545E-02 | 0.9642E+00 |            |            |            |            |            |            |
| 15         | 0.6488E+02 | 0.8978E-02 | 0.9653E+00 | 0.5801E+02 | 0.1027E-01 | 0.9389E+00 | 0.7991E+02 |
| 0.4727E-02 | 0.9704E+00 |            |            |            |            |            |            |
| 20         | 0.6568E+02 | 0.7374E-02 | 0.9717E+00 | 0.5935E+02 | 0.8348E-02 | 0.9511E+00 | 0.8115E+02 |
| 0.3977E-02 | 0.9757E+00 |            |            |            |            |            |            |
| 25         | 0.6648E+02 | 0.6119E-02 | 0.9770E+00 | 0.6070E+02 | 0.6953E-02 | 0.9612E+00 | 0.8239E+02 |
| 0.3214E-02 | 0.9801E+00 |            |            |            |            |            |            |
| 30         | 0.6727E+02 | 0.5094E-02 | 0.9813E+00 | 0.6205E+02 | 0.5469E-02 | 0.9693E+00 | 0.8363E+02 |
| 0.2633E-02 | 0.9836E+00 |            |            |            |            |            |            |
| 35         | 0.6807E+02 | 0.4156E-02 | 0.9850E+00 | 0.6339E+02 | 0.4379E-02 | 0.9758E+00 | 0.8487E+02 |
| 0.2232E-02 | 0.9865E+00 |            |            |            |            |            |            |
| 40         | 0.6887E+02 | 0.3347E-02 | 0.9879E+00 | 0.6474E+02 | 0.3295E-02 | 0.9808E+00 | 0.8610E+02 |
| 0.1848E-02 | 0.9890E+00 |            |            |            |            |            |            |
| 45         | 0.6967E+02 | 0.2704E-02 | 0.9902E+00 | 0.6608E+02 | 0.2503E-02 | 0.9845E+00 | 0.8734E+02 |
| 0.1509E-02 | 0.9911E+00 |            |            |            |            |            |            |
| 50         | 0.7046E+02 | 0.2239E-02 | 0.9922E+00 | 0.6743E+02 | 0.2061E-02 | 0.9875E+00 | 0.8858E+02 |
| 0.1216E-02 | 0.9927E+00 |            |            |            |            |            |            |
| 55         | 0.7126E+02 | 0.1834E-02 | 0.9937E+00 | 0.6877E+02 | 0.1715E-02 | 0.9900E+00 | 0.8982E+02 |
| 0.9990E-03 | 0.9940E+00 |            |            |            |            |            |            |
| 60         | 0.7206E+02 | 0.1517E-02 | 0.9951E+00 | 0.7012E+02 | 0.1396E-02 | 0.9921E+00 | 0.9105E+02 |
| 0.8084E-03 | 0.9951E+00 |            |            |            |            |            |            |
| 65         | 0.7286E+02 | 0.1216E-02 | 0.9961E+00 | 0.7147E+02 | 0.1050E-02 | 0.9937E+00 | 0.9229E+02 |
| 0.6655E-03 | 0.9960E+00 |            |            |            |            |            |            |

| V1_Results_baseline_Irena.dat |            |            |            |            |            |            |            |  |
|-------------------------------|------------|------------|------------|------------|------------|------------|------------|--|
| 70                            | 0.7365E+02 | 0.9616E-03 | 0.9970E+00 | 0.7281E+02 | 0.8541E-03 | 0.9949E+00 | 0.9353E+02 |  |
| 0.5662E-03                    | 0.9968E+00 |            |            |            |            |            |            |  |
| 75                            | 0.7445E+02 | 0.7100E-03 | 0.9976E+00 | 0.7416E+02 | 0.7176E-03 | 0.9960E+00 | 0.9477E+02 |  |
| 0.5037E-03                    | 0.9974E+00 |            |            |            |            |            |            |  |
| 80                            | 0.7525E+02 | 0.5757E-03 | 0.9981E+00 | 0.7550E+02 | 0.5464E-03 | 0.9968E+00 | 0.9601E+02 |  |
| 0.4315E-03                    | 0.9980E+00 |            |            |            |            |            |            |  |
| 85                            | 0.7605E+02 | 0.4974E-03 | 0.9985E+00 | 0.7685E+02 | 0.4488E-03 | 0.9974E+00 | 0.9724E+02 |  |
| 0.3324E-03                    | 0.9985E+00 |            |            |            |            |            |            |  |
| 90                            | 0.7684E+02 | 0.3931E-03 | 0.9989E+00 | 0.7820E+02 | 0.3721E-03 | 0.9980E+00 | 0.9848E+02 |  |
| 0.2467E-03                    | 0.9988E+00 |            |            |            |            |            |            |  |
| 95                            | 0.7764E+02 | 0.2602E-03 | 0.9991E+00 | 0.7954E+02 | 0.2733E-03 | 0.9984E+00 | 0.9972E+02 |  |
| 0.1820E-03                    | 0.9991E+00 |            |            |            |            |            |            |  |
| 100                           | 0.7844E+02 | 0.1716E-03 | 0.9993E+00 | 0.8089E+02 | 0.2192E-03 | 0.9987E+00 | 0.1010E+03 |  |
| 0.1481E-03                    | 0.9993E+00 |            |            |            |            |            |            |  |
| 105                           | 0.7924E+02 | 0.1414E-03 | 0.9994E+00 | 0.8223E+02 | 0.1651E-03 | 0.9990E+00 | 0.1022E+03 |  |
| 0.1051E-03                    | 0.9994E+00 |            |            |            |            |            |            |  |
| 110                           | 0.8003E+02 | 0.1254E-03 | 0.9995E+00 | 0.8358E+02 | 0.1342E-03 | 0.9992E+00 | 0.1034E+03 |  |
| 0.7542E-04                    | 0.9995E+00 |            |            |            |            |            |            |  |
| 115                           | 0.8083E+02 | 0.1018E-03 | 0.9996E+00 | 0.8493E+02 | 0.9935E-04 | 0.9993E+00 | 0.1047E+03 |  |
| 0.5173E-04                    | 0.9996E+00 |            |            |            |            |            |            |  |
| 120                           | 0.8163E+02 | 0.7711E-04 | 0.9997E+00 | 0.8627E+02 | 0.7174E-04 | 0.9994E+00 | 0.1059E+03 |  |
| 0.5005E-04                    | 0.9996E+00 |            |            |            |            |            |            |  |
| 125                           | 0.8243E+02 | 0.5646E-04 | 0.9997E+00 | 0.8762E+02 | 0.5974E-04 | 0.9995E+00 | 0.1071E+03 |  |
| 0.5917E-04                    | 0.9997E+00 |            |            |            |            |            |            |  |
| 130                           | 0.8322E+02 | 0.5474E-04 | 0.9998E+00 | 0.8896E+02 | 0.7350E-04 | 0.9996E+00 | 0.1084E+03 |  |
| 0.5436E-04                    | 0.9998E+00 |            |            |            |            |            |            |  |
| 135                           | 0.8402E+02 | 0.5336E-04 | 0.9998E+00 | 0.9031E+02 | 0.7833E-04 | 0.9997E+00 | 0.1096E+03 |  |
| 0.3172E-04                    | 0.9998E+00 |            |            |            |            |            |            |  |
| 140                           | 0.8482E+02 | 0.3989E-04 | 0.9998E+00 | 0.9166E+02 | 0.5174E-04 | 0.9998E+00 | 0.1109E+03 |  |
| 0.1184E-04                    | 0.9999E+00 |            |            |            |            |            |            |  |
| 145                           | 0.8562E+02 | 0.2914E-04 | 0.9999E+00 | 0.9300E+02 | 0.3899E-04 | 0.9999E+00 | 0.1121E+03 |  |
| 0.9853E-05                    | 0.9999E+00 |            |            |            |            |            |            |  |
| 150                           | 0.8641E+02 | 0.2772E-04 | 0.9999E+00 | 0.9435E+02 | 0.2212E-04 | 0.9999E+00 | 0.1133E+03 |  |
| 0.1143E-04                    | 0.9999E+00 |            |            |            |            |            |            |  |
| 155                           | 0.8721E+02 | 0.2056E-04 | 0.9999E+00 | 0.9569E+02 | 0.1174E-04 | 0.9999E+00 | 0.1146E+03 |  |
| 0.1392E-04                    | 0.9999E+00 |            |            |            |            |            |            |  |

# V1\_Results\_baseline\_Irena.dat

|            |            |            |            |            |            |            |            |
|------------|------------|------------|------------|------------|------------|------------|------------|
| 160        | 0.8801E+02 | 0.1281E-04 | 0.9999E+00 | 0.9704E+02 | 0.9309E-05 | 0.9999E+00 | 0.1158E+03 |
| 0.1661E-04 | 0.9999E+00 |            |            |            |            |            |            |
| 165        | 0.8881E+02 | 0.1072E-04 | 0.9999E+00 | 0.9838E+02 | 0.1401E-04 | 0.9999E+00 | 0.1171E+03 |
| 0.1664E-04 | 0.9999E+00 |            |            |            |            |            |            |
| 170        | 0.8960E+02 | 0.1316E-04 | 0.9999E+00 | 0.9973E+02 | 0.1163E-04 | 0.1000E+01 | 0.1183E+03 |
| 0.1201E-04 | 0.1000E+01 |            |            |            |            |            |            |
| 175        | 0.9040E+02 | 0.1249E-04 | 0.1000E+01 | 0.1011E+03 | 0.1156E-04 | 0.1000E+01 | 0.1195E+03 |
| 0.5349E-05 | 0.1000E+01 |            |            |            |            |            |            |
| 180        | 0.9120E+02 | 0.1092E-04 | 0.1000E+01 | 0.1024E+03 | 0.6432E-05 | 0.1000E+01 | 0.1208E+03 |
| 0.4027E-05 | 0.1000E+01 |            |            |            |            |            |            |
| 185        | 0.9200E+02 | 0.1003E-04 | 0.1000E+01 | 0.1038E+03 | 0.0000E+00 | 0.1000E+01 | 0.1220E+03 |
| 0.2983E-05 | 0.1000E+01 |            |            |            |            |            |            |
| 190        | 0.9279E+02 | 0.1008E-04 | 0.1000E+01 | 0.1051E+03 | 0.0000E+00 | 0.1000E+01 | 0.1232E+03 |
| 0.4010E-05 | 0.1000E+01 |            |            |            |            |            |            |
| 195        | 0.9359E+02 | 0.1285E-04 | 0.1000E+01 | 0.1065E+03 | 0.1147E-05 | 0.1000E+01 | 0.1245E+03 |
| 0.5788E-05 | 0.1000E+01 |            |            |            |            |            |            |
| 200        | 0.9439E+02 | 0.1148E-04 | 0.1000E+01 | 0.1078E+03 | 0.4320E-05 | 0.1000E+01 | 0.1257E+03 |
| 0.5890E-05 | 0.1000E+01 |            |            |            |            |            |            |

| #    | *****       | Standardised | *****       |            |             |            |
|------|-------------|--------------|-------------|------------|-------------|------------|
| -200 | -0.3344E+01 | 0.3156E-04   | -0.2002E+01 | 0.2011E-02 | -0.3026E+01 | 0.7663E-04 |
| -195 | -0.3220E+01 | 0.6844E-04   | -0.1870E+01 | 0.8143E-02 | -0.2906E+01 | 0.1903E-03 |
| -190 | -0.3095E+01 | 0.2107E-03   | -0.1738E+01 | 0.2579E-01 | -0.2787E+01 | 0.5350E-03 |
| -185 | -0.2971E+01 | 0.3412E-03   | -0.1606E+01 | 0.5962E-01 | -0.2667E+01 | 0.1317E-02 |
| -180 | -0.2847E+01 | 0.5722E-03   | -0.1474E+01 | 0.1101E+00 | -0.2548E+01 | 0.3029E-02 |
| -175 | -0.2723E+01 | 0.1198E-02   | -0.1342E+01 | 0.1763E+00 | -0.2429E+01 | 0.5726E-02 |
| -170 | -0.2599E+01 | 0.2777E-02   | -0.1211E+01 | 0.2505E+00 | -0.2309E+01 | 0.9775E-02 |
| -165 | -0.2475E+01 | 0.5016E-02   | -0.1079E+01 | 0.3233E+00 | -0.2190E+01 | 0.1657E-01 |
| -160 | -0.2351E+01 | 0.8948E-02   | -0.9469E+00 | 0.3859E+00 | -0.2071E+01 | 0.2639E-01 |
| -155 | -0.2227E+01 | 0.1533E-01   | -0.8150E+00 | 0.4342E+00 | -0.1951E+01 | 0.4055E-01 |
| -150 | -0.2103E+01 | 0.2536E-01   | -0.6831E+00 | 0.4644E+00 | -0.1832E+01 | 0.5846E-01 |
| -145 | -0.1979E+01 | 0.3926E-01   | -0.5513E+00 | 0.4756E+00 | -0.1713E+01 | 0.8150E-01 |
| -140 | -0.1855E+01 | 0.5782E-01   | -0.4194E+00 | 0.4698E+00 | -0.1593E+01 | 0.1081E+00 |
| -135 | -0.1730E+01 | 0.8107E-01   | -0.2875E+00 | 0.4565E+00 | -0.1474E+01 | 0.1406E+00 |
| -130 | -0.1606E+01 | 0.1089E+00   | -0.1557E+00 | 0.4367E+00 | -0.1355E+01 | 0.1789E+00 |

## V1\_Results\_baseline\_Irena.dat

|      |             |            |             |            |             |            |
|------|-------------|------------|-------------|------------|-------------|------------|
| -125 | -0.1482E+01 | 0.1420E+00 | -0.2380E-01 | 0.4091E+00 | -0.1235E+01 | 0.2205E+00 |
| -120 | -0.1358E+01 | 0.1777E+00 | 0.1081E+00  | 0.3758E+00 | -0.1116E+01 | 0.2618E+00 |
| -115 | -0.1234E+01 | 0.2174E+00 | 0.2399E+00  | 0.3425E+00 | -0.9965E+00 | 0.2999E+00 |
| -110 | -0.1110E+01 | 0.2570E+00 | 0.3718E+00  | 0.3126E+00 | -0.8772E+00 | 0.3315E+00 |
| -105 | -0.9859E+00 | 0.2955E+00 | 0.5037E+00  | 0.2813E+00 | -0.7578E+00 | 0.3588E+00 |
| -100 | -0.8618E+00 | 0.3296E+00 | 0.6355E+00  | 0.2458E+00 | -0.6385E+00 | 0.3797E+00 |
| -95  | -0.7377E+00 | 0.3588E+00 | 0.7674E+00  | 0.2133E+00 | -0.5191E+00 | 0.3952E+00 |
| -90  | -0.6136E+00 | 0.3807E+00 | 0.8992E+00  | 0.1859E+00 | -0.3998E+00 | 0.4071E+00 |
| -85  | -0.4895E+00 | 0.3952E+00 | 0.1031E+01  | 0.1623E+00 | -0.2804E+00 | 0.4162E+00 |
| -80  | -0.3654E+00 | 0.4053E+00 | 0.1163E+01  | 0.1412E+00 | -0.1610E+00 | 0.4162E+00 |
| -75  | -0.2413E+00 | 0.4091E+00 | 0.1295E+01  | 0.1206E+00 | -0.4169E-01 | 0.4055E+00 |
| -70  | -0.1172E+00 | 0.4075E+00 | 0.1427E+01  | 0.1028E+00 | 0.7766E-01  | 0.3887E+00 |
| -65  | 0.6878E-02  | 0.3966E+00 | 0.1559E+01  | 0.8888E-01 | 0.1970E+00  | 0.3697E+00 |
| -60  | 0.1310E+00  | 0.3807E+00 | 0.1690E+01  | 0.7635E-01 | 0.3164E+00  | 0.3481E+00 |
| -55  | 0.2551E+00  | 0.3611E+00 | 0.1822E+01  | 0.6555E-01 | 0.4357E+00  | 0.3225E+00 |
| -50  | 0.3792E+00  | 0.3380E+00 | 0.1954E+01  | 0.5702E-01 | 0.5551E+00  | 0.2969E+00 |
| -45  | 0.5033E+00  | 0.3136E+00 | 0.2086E+01  | 0.5011E-01 | 0.6744E+00  | 0.2711E+00 |
| -40  | 0.6273E+00  | 0.2885E+00 | 0.2218E+01  | 0.4205E-01 | 0.7938E+00  | 0.2479E+00 |
| -35  | 0.7514E+00  | 0.2643E+00 | 0.2350E+01  | 0.3586E-01 | 0.9131E+00  | 0.2218E+00 |
| -30  | 0.8755E+00  | 0.2350E+00 | 0.2482E+01  | 0.3047E-01 | 0.1033E+01  | 0.1966E+00 |
| -25  | 0.9996E+00  | 0.2068E+00 | 0.2613E+01  | 0.2476E-01 | 0.1152E+01  | 0.1724E+00 |
| -20  | 0.1124E+01  | 0.1803E+00 | 0.2745E+01  | 0.1992E-01 | 0.1271E+01  | 0.1506E+00 |
| -15  | 0.1248E+01  | 0.1584E+00 | 0.2877E+01  | 0.1701E-01 | 0.1391E+01  | 0.1312E+00 |
| -10  | 0.1372E+01  | 0.1360E+00 | 0.3009E+01  | 0.1488E-01 | 0.1510E+01  | 0.1132E+00 |
| -5   | 0.1496E+01  | 0.1151E+00 | 0.3141E+01  | 0.1304E-01 | 0.1629E+01  | 0.9721E-01 |
| 0    | 0.1620E+01  | 0.9643E-01 | 0.3273E+01  | 0.1149E-01 | 0.1749E+01  | 0.8230E-01 |
| 5    | 0.1744E+01  | 0.8204E-01 | 0.3405E+01  | 0.9771E-02 | 0.1868E+01  | 0.6860E-01 |
| 10   | 0.1868E+01  | 0.6892E-01 | 0.3537E+01  | 0.7864E-02 | 0.1987E+01  | 0.5751E-01 |
| 15   | 0.1992E+01  | 0.5770E-01 | 0.3668E+01  | 0.6630E-02 | 0.2107E+01  | 0.4903E-01 |
| 20   | 0.2116E+01  | 0.4739E-01 | 0.3800E+01  | 0.5793E-02 | 0.2226E+01  | 0.4125E-01 |
| 25   | 0.2241E+01  | 0.3932E-01 | 0.3932E+01  | 0.5186E-02 | 0.2345E+01  | 0.3333E-01 |
| 30   | 0.2365E+01  | 0.3273E-01 | 0.4064E+01  | 0.4231E-02 | 0.2465E+01  | 0.2731E-01 |
| 35   | 0.2489E+01  | 0.2671E-01 | 0.4196E+01  | 0.3550E-02 | 0.2584E+01  | 0.2315E-01 |
| 40   | 0.2613E+01  | 0.2151E-01 | 0.4328E+01  | 0.3193E-02 | 0.2703E+01  | 0.1917E-01 |
| 45   | 0.2737E+01  | 0.1738E-01 | 0.4460E+01  | 0.2783E-02 | 0.2823E+01  | 0.1565E-01 |
| 50   | 0.2861E+01  | 0.1439E-01 | 0.4591E+01  | 0.2270E-02 | 0.2942E+01  | 0.1261E-01 |

# V1\_Results\_baseline\_Irena.dat

|     |            |            |            |            |            |            |
|-----|------------|------------|------------|------------|------------|------------|
| 55  | 0.2985E+01 | 0.1178E-01 | 0.4723E+01 | 0.1766E-02 | 0.3062E+01 | 0.1036E-01 |
| 60  | 0.3109E+01 | 0.9749E-02 | 0.4855E+01 | 0.1584E-02 | 0.3181E+01 | 0.8385E-02 |
| 65  | 0.3233E+01 | 0.7811E-02 | 0.4987E+01 | 0.1281E-02 | 0.3300E+01 | 0.6902E-02 |
| 70  | 0.3357E+01 | 0.6179E-02 | 0.5119E+01 | 0.1103E-02 | 0.3420E+01 | 0.5872E-02 |
| 75  | 0.3482E+01 | 0.4563E-02 | 0.5251E+01 | 0.9444E-03 | 0.3539E+01 | 0.5224E-02 |
| 80  | 0.3606E+01 | 0.3699E-02 | 0.5383E+01 | 0.7646E-03 | 0.3658E+01 | 0.4475E-02 |
| 85  | 0.3730E+01 | 0.3196E-02 | 0.5515E+01 | 0.5823E-03 | 0.3778E+01 | 0.3447E-02 |
| 90  | 0.3854E+01 | 0.2526E-02 | 0.5646E+01 | 0.4704E-03 | 0.3897E+01 | 0.2558E-02 |
| 95  | 0.3978E+01 | 0.1672E-02 | 0.5778E+01 | 0.4345E-03 | 0.4016E+01 | 0.1887E-02 |
| 100 | 0.4102E+01 | 0.1103E-02 | 0.5910E+01 | 0.4863E-03 | 0.4136E+01 | 0.1536E-02 |
| 105 | 0.4226E+01 | 0.9086E-03 | 0.6042E+01 | 0.5878E-03 | 0.4255E+01 | 0.1090E-02 |
| 110 | 0.4350E+01 | 0.8055E-03 | 0.6174E+01 | 0.5417E-03 | 0.4374E+01 | 0.7822E-03 |
| 115 | 0.4474E+01 | 0.6543E-03 | 0.6306E+01 | 0.3953E-03 | 0.4494E+01 | 0.5366E-03 |
| 120 | 0.4598E+01 | 0.4955E-03 | 0.6438E+01 | 0.3297E-03 | 0.4613E+01 | 0.5191E-03 |
| 125 | 0.4722E+01 | 0.3628E-03 | 0.6569E+01 | 0.2445E-03 | 0.4732E+01 | 0.6137E-03 |
| 130 | 0.4847E+01 | 0.3518E-03 | 0.6701E+01 | 0.1587E-03 | 0.4852E+01 | 0.5638E-03 |
| 135 | 0.4971E+01 | 0.3429E-03 | 0.6833E+01 | 0.9343E-04 | 0.4971E+01 | 0.3290E-03 |
| 140 | 0.5095E+01 | 0.2564E-03 | 0.6965E+01 | 0.6981E-04 | 0.5091E+01 | 0.1228E-03 |
| 145 | 0.5219E+01 | 0.1872E-03 | 0.7097E+01 | 0.8314E-04 | 0.5210E+01 | 0.1022E-03 |
| 150 | 0.5343E+01 | 0.1781E-03 | 0.7229E+01 | 0.1035E-03 | 0.5329E+01 | 0.1186E-03 |
| 155 | 0.5467E+01 | 0.1321E-03 | 0.7361E+01 | 0.1009E-03 | 0.5449E+01 | 0.1444E-03 |
| 160 | 0.5591E+01 | 0.8235E-04 | 0.7492E+01 | 0.7097E-04 | 0.5568E+01 | 0.1723E-03 |
| 165 | 0.5715E+01 | 0.6886E-04 | 0.7624E+01 | 0.8440E-04 | 0.5687E+01 | 0.1725E-03 |
| 170 | 0.5839E+01 | 0.8460E-04 | 0.7756E+01 | 0.5758E-04 | 0.5807E+01 | 0.1245E-03 |
| 175 | 0.5963E+01 | 0.8028E-04 | 0.7888E+01 | 0.1593E-04 | 0.5926E+01 | 0.5548E-04 |
| 180 | 0.6087E+01 | 0.7021E-04 | 0.8020E+01 | 0.0000E+00 | 0.6045E+01 | 0.4177E-04 |
| 185 | 0.6212E+01 | 0.6443E-04 | 0.8152E+01 | 0.0000E+00 | 0.6165E+01 | 0.3094E-04 |
| 190 | 0.6336E+01 | 0.6479E-04 | 0.8284E+01 | 0.0000E+00 | 0.6284E+01 | 0.4159E-04 |
| 195 | 0.6460E+01 | 0.8259E-04 | 0.8416E+01 | 0.1979E-04 | 0.6403E+01 | 0.6003E-04 |
| 200 | 0.6584E+01 | 0.7376E-04 | 0.8547E+01 | 0.3158E-04 | 0.6523E+01 | 0.6109E-04 |

```

#*****
#***  p.d.f. LCE (US$/MWh): TOTAL 2020, 2030, 2040 ,2050 (Smoothed, Not standardised) ***
#*****
#          2020          2030          2040          2050

```

# Vl\_Results\_baseline\_Irena.dat

| #          | *****      | NOT standardised | *****      |            |            |            |            |
|------------|------------|------------------|------------|------------|------------|------------|------------|
| -200       | 0.3676E+02 | 0.1337E-04       | 0.1288E+00 | 0.4401E-05 | 0.2521E+02 | 0.1336E-04 | 0.2107E+02 |
| 0.2920E-04 |            |                  |            |            |            |            |            |
| -195       | 0.3792E+02 | 0.3142E-04       | 0.1416E+01 | 0.1334E-05 | 0.2615E+02 | 0.1857E-04 | 0.2193E+02 |
| 0.9028E-04 |            |                  |            |            |            |            |            |
| -190       | 0.3908E+02 | 0.6022E-04       | 0.2704E+01 | 0.0000E+00 | 0.2708E+02 | 0.4693E-04 | 0.2280E+02 |
| 0.2292E-03 |            |                  |            |            |            |            |            |
| -185       | 0.4024E+02 | 0.1383E-03       | 0.3991E+01 | 0.0000E+00 | 0.2802E+02 | 0.1559E-03 | 0.2366E+02 |
| 0.5221E-03 |            |                  |            |            |            |            |            |
| -180       | 0.4140E+02 | 0.3329E-03       | 0.5279E+01 | 0.0000E+00 | 0.2896E+02 | 0.4472E-03 | 0.2452E+02 |
| 0.1082E-02 |            |                  |            |            |            |            |            |
| -175       | 0.4255E+02 | 0.7242E-03       | 0.6567E+01 | 0.0000E+00 | 0.2989E+02 | 0.9755E-03 | 0.2539E+02 |
| 0.2196E-02 |            |                  |            |            |            |            |            |
| -170       | 0.4371E+02 | 0.1321E-02       | 0.7854E+01 | 0.0000E+00 | 0.3083E+02 | 0.2033E-02 | 0.2625E+02 |
| 0.4274E-02 |            |                  |            |            |            |            |            |
| -165       | 0.4487E+02 | 0.2326E-02       | 0.9142E+01 | 0.0000E+00 | 0.3177E+02 | 0.4058E-02 | 0.2711E+02 |
| 0.7413E-02 |            |                  |            |            |            |            |            |
| -160       | 0.4603E+02 | 0.4058E-02       | 0.1043E+02 | 0.0000E+00 | 0.3270E+02 | 0.7009E-02 | 0.2797E+02 |
| 0.1177E-01 |            |                  |            |            |            |            |            |
| -155       | 0.4719E+02 | 0.6562E-02       | 0.1172E+02 | 0.0000E+00 | 0.3364E+02 | 0.1094E-01 | 0.2884E+02 |
| 0.1765E-01 |            |                  |            |            |            |            |            |
| -150       | 0.4835E+02 | 0.9736E-02       | 0.1300E+02 | 0.0000E+00 | 0.3458E+02 | 0.1627E-01 | 0.2970E+02 |
| 0.2461E-01 |            |                  |            |            |            |            |            |
| -145       | 0.4951E+02 | 0.1348E-01       | 0.1429E+02 | 0.0000E+00 | 0.3551E+02 | 0.2344E-01 | 0.3056E+02 |
| 0.3235E-01 |            |                  |            |            |            |            |            |
| -140       | 0.5066E+02 | 0.1785E-01       | 0.1558E+02 | 0.0000E+00 | 0.3645E+02 | 0.3160E-01 | 0.3143E+02 |
| 0.4056E-01 |            |                  |            |            |            |            |            |
| -135       | 0.5182E+02 | 0.2265E-01       | 0.1687E+02 | 0.0000E+00 | 0.3739E+02 | 0.3962E-01 | 0.3229E+02 |
| 0.4835E-01 |            |                  |            |            |            |            |            |
| -130       | 0.5298E+02 | 0.2761E-01       | 0.1815E+02 | 0.0000E+00 | 0.3832E+02 | 0.4694E-01 | 0.3315E+02 |
| 0.5520E-01 |            |                  |            |            |            |            |            |
| -125       | 0.5414E+02 | 0.3269E-01       | 0.1944E+02 | 0.0000E+00 | 0.3926E+02 | 0.5331E-01 | 0.3401E+02 |
| 0.6108E-01 |            |                  |            |            |            |            |            |
| -120       | 0.5530E+02 | 0.3749E-01       | 0.2073E+02 | 0.0000E+00 | 0.4020E+02 | 0.5875E-01 | 0.3488E+02 |

Vl\_Results\_baseline\_Irena.dat

|            |            |            |            |            |            |            |            |
|------------|------------|------------|------------|------------|------------|------------|------------|
| 0.6493E-01 |            |            |            |            |            |            |            |
| -115       | 0.5646E+02 | 0.4169E-01 | 0.2202E+02 | 0.0000E+00 | 0.4113E+02 | 0.6302E-01 | 0.3574E+02 |
| 0.6727E-01 |            |            |            |            |            |            |            |
| -110       | 0.5761E+02 | 0.4500E-01 | 0.2331E+02 | 0.0000E+00 | 0.4207E+02 | 0.6555E-01 | 0.3660E+02 |
| 0.6862E-01 |            |            |            |            |            |            |            |
| -105       | 0.5877E+02 | 0.4708E-01 | 0.2459E+02 | 0.0000E+00 | 0.4301E+02 | 0.6608E-01 | 0.3747E+02 |
| 0.6852E-01 |            |            |            |            |            |            |            |
| -100       | 0.5993E+02 | 0.4803E-01 | 0.2588E+02 | 0.0000E+00 | 0.4394E+02 | 0.6517E-01 | 0.3833E+02 |
| 0.6677E-01 |            |            |            |            |            |            |            |
| -95        | 0.6109E+02 | 0.4822E-01 | 0.2717E+02 | 0.0000E+00 | 0.4488E+02 | 0.6196E-01 | 0.3919E+02 |
| 0.6358E-01 |            |            |            |            |            |            |            |
| -90        | 0.6225E+02 | 0.4741E-01 | 0.2846E+02 | 0.6729E-05 | 0.4582E+02 | 0.5806E-01 | 0.4006E+02 |
| 0.5921E-01 |            |            |            |            |            |            |            |
| -85        | 0.6341E+02 | 0.4550E-01 | 0.2974E+02 | 0.1937E-04 | 0.4675E+02 | 0.5431E-01 | 0.4092E+02 |
| 0.5403E-01 |            |            |            |            |            |            |            |
| -80        | 0.6456E+02 | 0.4326E-01 | 0.3103E+02 | 0.1050E-03 | 0.4769E+02 | 0.4985E-01 | 0.4178E+02 |
| 0.4857E-01 |            |            |            |            |            |            |            |
| -75        | 0.6572E+02 | 0.4032E-01 | 0.3232E+02 | 0.3843E-03 | 0.4863E+02 | 0.4449E-01 | 0.4264E+02 |
| 0.4377E-01 |            |            |            |            |            |            |            |
| -70        | 0.6688E+02 | 0.3686E-01 | 0.3361E+02 | 0.1039E-02 | 0.4957E+02 | 0.3860E-01 | 0.4351E+02 |
| 0.3845E-01 |            |            |            |            |            |            |            |
| -65        | 0.6804E+02 | 0.3329E-01 | 0.3489E+02 | 0.2580E-02 | 0.5050E+02 | 0.3328E-01 | 0.4437E+02 |
| 0.3334E-01 |            |            |            |            |            |            |            |
| -60        | 0.6920E+02 | 0.2993E-01 | 0.3618E+02 | 0.5275E-02 | 0.5144E+02 | 0.2884E-01 | 0.4523E+02 |
| 0.2905E-01 |            |            |            |            |            |            |            |
| -55        | 0.7036E+02 | 0.2645E-01 | 0.3747E+02 | 0.9697E-02 | 0.5238E+02 | 0.2483E-01 | 0.4610E+02 |
| 0.2480E-01 |            |            |            |            |            |            |            |
| -50        | 0.7151E+02 | 0.2322E-01 | 0.3876E+02 | 0.1619E-01 | 0.5331E+02 | 0.2094E-01 | 0.4696E+02 |
| 0.2097E-01 |            |            |            |            |            |            |            |
| -45        | 0.7267E+02 | 0.2026E-01 | 0.4004E+02 | 0.2369E-01 | 0.5425E+02 | 0.1771E-01 | 0.4782E+02 |
| 0.1778E-01 |            |            |            |            |            |            |            |
| -40        | 0.7383E+02 | 0.1772E-01 | 0.4133E+02 | 0.3203E-01 | 0.5519E+02 | 0.1501E-01 | 0.4868E+02 |
| 0.1484E-01 |            |            |            |            |            |            |            |
| -35        | 0.7499E+02 | 0.1527E-01 | 0.4262E+02 | 0.4094E-01 | 0.5612E+02 | 0.1236E-01 | 0.4955E+02 |
| 0.1235E-01 |            |            |            |            |            |            |            |
| -30        | 0.7615E+02 | 0.1288E-01 | 0.4391E+02 | 0.4852E-01 | 0.5706E+02 | 0.9907E-02 | 0.5041E+02 |

Vl\_Results\_baseline\_Irena.dat

|            |            |            |            |            |            |            |            |
|------------|------------|------------|------------|------------|------------|------------|------------|
| 0.1028E-01 |            |            |            |            |            |            |            |
| -25        | 0.7731E+02 | 0.1096E-01 | 0.4519E+02 | 0.5437E-01 | 0.5800E+02 | 0.8140E-02 | 0.5127E+02 |
| 0.8359E-02 |            |            |            |            |            |            |            |
| -20        | 0.7846E+02 | 0.9363E-02 | 0.4648E+02 | 0.5830E-01 | 0.5893E+02 | 0.6664E-02 | 0.5214E+02 |
| 0.6570E-02 |            |            |            |            |            |            |            |
| -15        | 0.7962E+02 | 0.7970E-02 | 0.4777E+02 | 0.5998E-01 | 0.5987E+02 | 0.5245E-02 | 0.5300E+02 |
| 0.5343E-02 |            |            |            |            |            |            |            |
| -10        | 0.8078E+02 | 0.6540E-02 | 0.4906E+02 | 0.5835E-01 | 0.6081E+02 | 0.4249E-02 | 0.5386E+02 |
| 0.4537E-02 |            |            |            |            |            |            |            |
| -5         | 0.8194E+02 | 0.5316E-02 | 0.5034E+02 | 0.5496E-01 | 0.6174E+02 | 0.3611E-02 | 0.5472E+02 |
| 0.3770E-02 |            |            |            |            |            |            |            |
| 0          | 0.8310E+02 | 0.4238E-02 | 0.5163E+02 | 0.5070E-01 | 0.6268E+02 | 0.2907E-02 | 0.5559E+02 |
| 0.2990E-02 |            |            |            |            |            |            |            |
| 5          | 0.8426E+02 | 0.3479E-02 | 0.5292E+02 | 0.4502E-01 | 0.6362E+02 | 0.2185E-02 | 0.5645E+02 |
| 0.2335E-02 |            |            |            |            |            |            |            |
| 10         | 0.8541E+02 | 0.2900E-02 | 0.5421E+02 | 0.3950E-01 | 0.6455E+02 | 0.1769E-02 | 0.5731E+02 |
| 0.1871E-02 |            |            |            |            |            |            |            |
| 15         | 0.8657E+02 | 0.2393E-02 | 0.5549E+02 | 0.3445E-01 | 0.6549E+02 | 0.1519E-02 | 0.5818E+02 |
| 0.1595E-02 |            |            |            |            |            |            |            |
| 20         | 0.8773E+02 | 0.1931E-02 | 0.5678E+02 | 0.2940E-01 | 0.6643E+02 | 0.1259E-02 | 0.5904E+02 |
| 0.1338E-02 |            |            |            |            |            |            |            |
| 25         | 0.8889E+02 | 0.1546E-02 | 0.5807E+02 | 0.2379E-01 | 0.6736E+02 | 0.9361E-03 | 0.5990E+02 |
| 0.1050E-02 |            |            |            |            |            |            |            |
| 30         | 0.9005E+02 | 0.1278E-02 | 0.5936E+02 | 0.1880E-01 | 0.6830E+02 | 0.6989E-03 | 0.6076E+02 |
| 0.8598E-03 |            |            |            |            |            |            |            |
| 35         | 0.9121E+02 | 0.1088E-02 | 0.6064E+02 | 0.1533E-01 | 0.6924E+02 | 0.5828E-03 | 0.6163E+02 |
| 0.7076E-03 |            |            |            |            |            |            |            |
| 40         | 0.9236E+02 | 0.8614E-03 | 0.6193E+02 | 0.1231E-01 | 0.7017E+02 | 0.4654E-03 | 0.6249E+02 |
| 0.5032E-03 |            |            |            |            |            |            |            |
| 45         | 0.9352E+02 | 0.6512E-03 | 0.6322E+02 | 0.9775E-02 | 0.7111E+02 | 0.3557E-03 | 0.6335E+02 |
| 0.4131E-03 |            |            |            |            |            |            |            |
| 50         | 0.9468E+02 | 0.5237E-03 | 0.6451E+02 | 0.7504E-02 | 0.7205E+02 | 0.2901E-03 | 0.6422E+02 |
| 0.3691E-03 |            |            |            |            |            |            |            |
| 55         | 0.9584E+02 | 0.4621E-03 | 0.6579E+02 | 0.5545E-02 | 0.7299E+02 | 0.2320E-03 | 0.6508E+02 |
| 0.3035E-03 |            |            |            |            |            |            |            |
| 60         | 0.9700E+02 | 0.3983E-03 | 0.6708E+02 | 0.4331E-02 | 0.7392E+02 | 0.1665E-03 | 0.6594E+02 |

V1\_Results\_baseline\_Irena.dat

|            |            |            |            |            |            |            |            |
|------------|------------|------------|------------|------------|------------|------------|------------|
| 0.2266E-03 |            |            |            |            |            |            |            |
| 65         | 0.9816E+02 | 0.3424E-03 | 0.6837E+02 | 0.3251E-02 | 0.7486E+02 | 0.9577E-04 | 0.6680E+02 |
| 0.1894E-03 |            |            |            |            |            |            |            |
| 70         | 0.9932E+02 | 0.2836E-03 | 0.6966E+02 | 0.2529E-02 | 0.7580E+02 | 0.7553E-04 | 0.6767E+02 |
| 0.1717E-03 |            |            |            |            |            |            |            |
| 75         | 0.1005E+03 | 0.2171E-03 | 0.7095E+02 | 0.1974E-02 | 0.7673E+02 | 0.9887E-04 | 0.6853E+02 |
| 0.1588E-03 |            |            |            |            |            |            |            |
| 80         | 0.1016E+03 | 0.1699E-03 | 0.7223E+02 | 0.1432E-02 | 0.7767E+02 | 0.1116E-03 | 0.6939E+02 |
| 0.1161E-03 |            |            |            |            |            |            |            |
| 85         | 0.1028E+03 | 0.1582E-03 | 0.7352E+02 | 0.1103E-02 | 0.7861E+02 | 0.8466E-04 | 0.7026E+02 |
| 0.7287E-04 |            |            |            |            |            |            |            |
| 90         | 0.1039E+03 | 0.1353E-03 | 0.7481E+02 | 0.8523E-03 | 0.7954E+02 | 0.4446E-04 | 0.7112E+02 |
| 0.5802E-04 |            |            |            |            |            |            |            |
| 95         | 0.1051E+03 | 0.9383E-04 | 0.7610E+02 | 0.6263E-03 | 0.8048E+02 | 0.2668E-04 | 0.7198E+02 |
| 0.4679E-04 |            |            |            |            |            |            |            |
| 100        | 0.1063E+03 | 0.5637E-04 | 0.7738E+02 | 0.4325E-03 | 0.8142E+02 | 0.3206E-04 | 0.7284E+02 |
| 0.4381E-04 |            |            |            |            |            |            |            |
| 105        | 0.1074E+03 | 0.5130E-04 | 0.7867E+02 | 0.3797E-03 | 0.8235E+02 | 0.3617E-04 | 0.7371E+02 |
| 0.5298E-04 |            |            |            |            |            |            |            |
| 110        | 0.1086E+03 | 0.5284E-04 | 0.7996E+02 | 0.3160E-03 | 0.8329E+02 | 0.2687E-04 | 0.7457E+02 |
| 0.5609E-04 |            |            |            |            |            |            |            |
| 115        | 0.1097E+03 | 0.5232E-04 | 0.8125E+02 | 0.2122E-03 | 0.8423E+02 | 0.2461E-04 | 0.7543E+02 |
| 0.4692E-04 |            |            |            |            |            |            |            |
| 120        | 0.1109E+03 | 0.4180E-04 | 0.8253E+02 | 0.1460E-03 | 0.8516E+02 | 0.2645E-04 | 0.7630E+02 |
| 0.3030E-04 |            |            |            |            |            |            |            |
| 125        | 0.1121E+03 | 0.3622E-04 | 0.8382E+02 | 0.1059E-03 | 0.8610E+02 | 0.2731E-04 | 0.7716E+02 |
| 0.1254E-04 |            |            |            |            |            |            |            |
| 130        | 0.1132E+03 | 0.3322E-04 | 0.8511E+02 | 0.7852E-04 | 0.8704E+02 | 0.2373E-04 | 0.7802E+02 |
| 0.1173E-04 |            |            |            |            |            |            |            |
| 135        | 0.1144E+03 | 0.3369E-04 | 0.8640E+02 | 0.6972E-04 | 0.8797E+02 | 0.1917E-04 | 0.7888E+02 |
| 0.1094E-04 |            |            |            |            |            |            |            |
| 140        | 0.1155E+03 | 0.2247E-04 | 0.8768E+02 | 0.5770E-04 | 0.8891E+02 | 0.1552E-04 | 0.7975E+02 |
| 0.6082E-05 |            |            |            |            |            |            |            |
| 145        | 0.1167E+03 | 0.1700E-04 | 0.8897E+02 | 0.2248E-04 | 0.8985E+02 | 0.1065E-04 | 0.8061E+02 |
| 0.0000E+00 |            |            |            |            |            |            |            |
| 150        | 0.1178E+03 | 0.1336E-04 | 0.9026E+02 | 0.7201E-05 | 0.9078E+02 | 0.1210E-05 | 0.8147E+02 |

# Vl\_Results\_baseline\_Irena.dat

```

0.2054E-05
 155  0.1190E+03  0.9929E-05  0.9155E+02  0.1931E-04  0.9172E+02  0.0000E+00  0.8234E+02
0.6897E-05
 160  0.1202E+03  0.4873E-05  0.9283E+02  0.1857E-04  0.9266E+02  0.0000E+00  0.8320E+02
0.1894E-04
 165  0.1213E+03  0.4963E-05  0.9412E+02  0.1012E-04  0.9359E+02  0.0000E+00  0.8406E+02
0.2407E-04
 170  0.1225E+03  0.4748E-05  0.9541E+02  0.1325E-04  0.9453E+02  0.0000E+00  0.8493E+02
0.1898E-04
 175  0.1236E+03  0.9209E-05  0.9670E+02  0.1547E-04  0.9547E+02  0.0000E+00  0.8579E+02
0.7850E-05
 180  0.1248E+03  0.1104E-04  0.9798E+02  0.6418E-05  0.9640E+02  0.0000E+00  0.8665E+02
0.7872E-05
 185  0.1260E+03  0.9606E-05  0.9927E+02  0.5268E-06  0.9734E+02  0.0000E+00  0.8751E+02
0.4763E-05
 190  0.1271E+03  0.7268E-05  0.1006E+03  0.4285E-05  0.9828E+02  0.0000E+00  0.8838E+02
0.1418E-05
 195  0.1283E+03  0.9029E-05  0.1018E+03  0.4265E-05  0.9922E+02  0.2682E-05  0.8924E+02
0.2972E-05
 200  0.1294E+03  0.6579E-05  0.1031E+03  0.4401E-05  0.1002E+03  0.4873E-05  0.9010E+02
0.5096E-05

```

# \*\*\*\*\* adaptados para un plot en 3D con gnuplot \*\*\*\*\*

```

0.3676E+02  0.1337E-04  0.2020E+04  0xff0000
0.3792E+02  0.3142E-04  0.2020E+04  0xff0000
0.3908E+02  0.6022E-04  0.2020E+04  0xff0000
0.4024E+02  0.1383E-03  0.2020E+04  0xff0000
0.4140E+02  0.3329E-03  0.2020E+04  0xff0000
0.4255E+02  0.7242E-03  0.2020E+04  0xff0000
0.4371E+02  0.1321E-02  0.2020E+04  0xff0000
0.4487E+02  0.2326E-02  0.2020E+04  0xff0000
0.4603E+02  0.4058E-02  0.2020E+04  0xff0000
0.4719E+02  0.6562E-02  0.2020E+04  0xff0000
0.4835E+02  0.9736E-02  0.2020E+04  0xff0000
0.4951E+02  0.1348E-01  0.2020E+04  0xff0000

```

V1\_Results\_baseline\_Irena.dat

|            |            |            |          |
|------------|------------|------------|----------|
| 0.5066E+02 | 0.1785E-01 | 0.2020E+04 | 0xff0000 |
| 0.5182E+02 | 0.2265E-01 | 0.2020E+04 | 0xff0000 |
| 0.5298E+02 | 0.2761E-01 | 0.2020E+04 | 0xff0000 |
| 0.5414E+02 | 0.3269E-01 | 0.2020E+04 | 0xff0000 |
| 0.5530E+02 | 0.3749E-01 | 0.2020E+04 | 0xff0000 |
| 0.5646E+02 | 0.4169E-01 | 0.2020E+04 | 0xff0000 |
| 0.5761E+02 | 0.4500E-01 | 0.2020E+04 | 0xff0000 |
| 0.5877E+02 | 0.4708E-01 | 0.2020E+04 | 0xff0000 |
| 0.5993E+02 | 0.4803E-01 | 0.2020E+04 | 0xff0000 |
| 0.6109E+02 | 0.4822E-01 | 0.2020E+04 | 0xff0000 |
| 0.6225E+02 | 0.4741E-01 | 0.2020E+04 | 0xff0000 |
| 0.6341E+02 | 0.4550E-01 | 0.2020E+04 | 0xff0000 |
| 0.6456E+02 | 0.4326E-01 | 0.2020E+04 | 0xff0000 |
| 0.6572E+02 | 0.4032E-01 | 0.2020E+04 | 0xff0000 |
| 0.6688E+02 | 0.3686E-01 | 0.2020E+04 | 0xff0000 |
| 0.6804E+02 | 0.3329E-01 | 0.2020E+04 | 0xff0000 |
| 0.6920E+02 | 0.2993E-01 | 0.2020E+04 | 0xff0000 |
| 0.7036E+02 | 0.2645E-01 | 0.2020E+04 | 0xff0000 |
| 0.7151E+02 | 0.2322E-01 | 0.2020E+04 | 0xff0000 |
| 0.7267E+02 | 0.2026E-01 | 0.2020E+04 | 0xff0000 |
| 0.7383E+02 | 0.1772E-01 | 0.2020E+04 | 0xff0000 |
| 0.7499E+02 | 0.1527E-01 | 0.2020E+04 | 0xff0000 |
| 0.7615E+02 | 0.1288E-01 | 0.2020E+04 | 0xff0000 |
| 0.7731E+02 | 0.1096E-01 | 0.2020E+04 | 0xff0000 |
| 0.7846E+02 | 0.9363E-02 | 0.2020E+04 | 0xff0000 |
| 0.7962E+02 | 0.7970E-02 | 0.2020E+04 | 0xff0000 |
| 0.8078E+02 | 0.6540E-02 | 0.2020E+04 | 0xff0000 |
| 0.8194E+02 | 0.5316E-02 | 0.2020E+04 | 0xff0000 |
| 0.8310E+02 | 0.4238E-02 | 0.2020E+04 | 0xff0000 |
| 0.8426E+02 | 0.3479E-02 | 0.2020E+04 | 0xff0000 |
| 0.8541E+02 | 0.2900E-02 | 0.2020E+04 | 0xff0000 |
| 0.8657E+02 | 0.2393E-02 | 0.2020E+04 | 0xff0000 |
| 0.8773E+02 | 0.1931E-02 | 0.2020E+04 | 0xff0000 |
| 0.8889E+02 | 0.1546E-02 | 0.2020E+04 | 0xff0000 |
| 0.9005E+02 | 0.1278E-02 | 0.2020E+04 | 0xff0000 |
| 0.9121E+02 | 0.1088E-02 | 0.2020E+04 | 0xff0000 |

## Vl\_Results\_baseline\_Irena.dat

|            |            |            |          |
|------------|------------|------------|----------|
| 0.9236E+02 | 0.8614E-03 | 0.2020E+04 | 0xff0000 |
| 0.9352E+02 | 0.6512E-03 | 0.2020E+04 | 0xff0000 |
| 0.9468E+02 | 0.5237E-03 | 0.2020E+04 | 0xff0000 |
| 0.9584E+02 | 0.4621E-03 | 0.2020E+04 | 0xff0000 |
| 0.9700E+02 | 0.3983E-03 | 0.2020E+04 | 0xff0000 |
| 0.9816E+02 | 0.3424E-03 | 0.2020E+04 | 0xff0000 |
| 0.9932E+02 | 0.2836E-03 | 0.2020E+04 | 0xff0000 |
| 0.1005E+03 | 0.2171E-03 | 0.2020E+04 | 0xff0000 |
| 0.1016E+03 | 0.1699E-03 | 0.2020E+04 | 0xff0000 |
| 0.1028E+03 | 0.1582E-03 | 0.2020E+04 | 0xff0000 |
| 0.1039E+03 | 0.1353E-03 | 0.2020E+04 | 0xff0000 |
| 0.1051E+03 | 0.9383E-04 | 0.2020E+04 | 0xff0000 |
| 0.1063E+03 | 0.5637E-04 | 0.2020E+04 | 0xff0000 |
| 0.1074E+03 | 0.5130E-04 | 0.2020E+04 | 0xff0000 |
| 0.1086E+03 | 0.5284E-04 | 0.2020E+04 | 0xff0000 |
| 0.1097E+03 | 0.5232E-04 | 0.2020E+04 | 0xff0000 |
| 0.1109E+03 | 0.4180E-04 | 0.2020E+04 | 0xff0000 |
| 0.1121E+03 | 0.3622E-04 | 0.2020E+04 | 0xff0000 |
| 0.1132E+03 | 0.3322E-04 | 0.2020E+04 | 0xff0000 |
| 0.1144E+03 | 0.3369E-04 | 0.2020E+04 | 0xff0000 |
| 0.1155E+03 | 0.2247E-04 | 0.2020E+04 | 0xff0000 |
| 0.1167E+03 | 0.1700E-04 | 0.2020E+04 | 0xff0000 |
| 0.1178E+03 | 0.1336E-04 | 0.2020E+04 | 0xff0000 |
| 0.1190E+03 | 0.9929E-05 | 0.2020E+04 | 0xff0000 |
| 0.1202E+03 | 0.4873E-05 | 0.2020E+04 | 0xff0000 |
| 0.1213E+03 | 0.4963E-05 | 0.2020E+04 | 0xff0000 |
| 0.1225E+03 | 0.4748E-05 | 0.2020E+04 | 0xff0000 |
| 0.1236E+03 | 0.9209E-05 | 0.2020E+04 | 0xff0000 |
| 0.1248E+03 | 0.1104E-04 | 0.2020E+04 | 0xff0000 |
| 0.1260E+03 | 0.9606E-05 | 0.2020E+04 | 0xff0000 |
| 0.1271E+03 | 0.7268E-05 | 0.2020E+04 | 0xff0000 |
| 0.1283E+03 | 0.9029E-05 | 0.2020E+04 | 0xff0000 |
| 0.1294E+03 | 0.6579E-05 | 0.2020E+04 | 0xff0000 |
| 0.1288E+00 | 0.4401E-05 | 0.2030E+04 | 0xffff00 |
| 0.1416E+01 | 0.1334E-05 | 0.2030E+04 | 0xffff00 |

## Vl\_Results\_baseline\_Irena.dat

|            |            |            |           |
|------------|------------|------------|-----------|
| 0.2704E+01 | 0.0000E+00 | 0.2030E+04 | 0xfffff00 |
| 0.3991E+01 | 0.0000E+00 | 0.2030E+04 | 0xfffff00 |
| 0.5279E+01 | 0.0000E+00 | 0.2030E+04 | 0xfffff00 |
| 0.6567E+01 | 0.0000E+00 | 0.2030E+04 | 0xfffff00 |
| 0.7854E+01 | 0.0000E+00 | 0.2030E+04 | 0xfffff00 |
| 0.9142E+01 | 0.0000E+00 | 0.2030E+04 | 0xfffff00 |
| 0.1043E+02 | 0.0000E+00 | 0.2030E+04 | 0xfffff00 |
| 0.1172E+02 | 0.0000E+00 | 0.2030E+04 | 0xfffff00 |
| 0.1300E+02 | 0.0000E+00 | 0.2030E+04 | 0xfffff00 |
| 0.1429E+02 | 0.0000E+00 | 0.2030E+04 | 0xfffff00 |
| 0.1558E+02 | 0.0000E+00 | 0.2030E+04 | 0xfffff00 |
| 0.1687E+02 | 0.0000E+00 | 0.2030E+04 | 0xfffff00 |
| 0.1815E+02 | 0.0000E+00 | 0.2030E+04 | 0xfffff00 |
| 0.1944E+02 | 0.0000E+00 | 0.2030E+04 | 0xfffff00 |
| 0.2073E+02 | 0.0000E+00 | 0.2030E+04 | 0xfffff00 |
| 0.2202E+02 | 0.0000E+00 | 0.2030E+04 | 0xfffff00 |
| 0.2331E+02 | 0.0000E+00 | 0.2030E+04 | 0xfffff00 |
| 0.2459E+02 | 0.0000E+00 | 0.2030E+04 | 0xfffff00 |
| 0.2588E+02 | 0.0000E+00 | 0.2030E+04 | 0xfffff00 |
| 0.2717E+02 | 0.0000E+00 | 0.2030E+04 | 0xfffff00 |
| 0.2846E+02 | 0.6729E-05 | 0.2030E+04 | 0xfffff00 |
| 0.2974E+02 | 0.1937E-04 | 0.2030E+04 | 0xfffff00 |
| 0.3103E+02 | 0.1050E-03 | 0.2030E+04 | 0xfffff00 |
| 0.3232E+02 | 0.3843E-03 | 0.2030E+04 | 0xfffff00 |
| 0.3361E+02 | 0.1039E-02 | 0.2030E+04 | 0xfffff00 |
| 0.3489E+02 | 0.2580E-02 | 0.2030E+04 | 0xfffff00 |
| 0.3618E+02 | 0.5275E-02 | 0.2030E+04 | 0xfffff00 |
| 0.3747E+02 | 0.9697E-02 | 0.2030E+04 | 0xfffff00 |
| 0.3876E+02 | 0.1619E-01 | 0.2030E+04 | 0xfffff00 |
| 0.4004E+02 | 0.2369E-01 | 0.2030E+04 | 0xfffff00 |
| 0.4133E+02 | 0.3203E-01 | 0.2030E+04 | 0xfffff00 |
| 0.4262E+02 | 0.4094E-01 | 0.2030E+04 | 0xfffff00 |
| 0.4391E+02 | 0.4852E-01 | 0.2030E+04 | 0xfffff00 |
| 0.4519E+02 | 0.5437E-01 | 0.2030E+04 | 0xfffff00 |
| 0.4648E+02 | 0.5830E-01 | 0.2030E+04 | 0xfffff00 |
| 0.4777E+02 | 0.5998E-01 | 0.2030E+04 | 0xfffff00 |

## Vl\_Results\_baseline\_Irena.dat

|            |            |            |           |
|------------|------------|------------|-----------|
| 0.4906E+02 | 0.5835E-01 | 0.2030E+04 | 0xfffff00 |
| 0.5034E+02 | 0.5496E-01 | 0.2030E+04 | 0xfffff00 |
| 0.5163E+02 | 0.5070E-01 | 0.2030E+04 | 0xfffff00 |
| 0.5292E+02 | 0.4502E-01 | 0.2030E+04 | 0xfffff00 |
| 0.5421E+02 | 0.3950E-01 | 0.2030E+04 | 0xfffff00 |
| 0.5549E+02 | 0.3445E-01 | 0.2030E+04 | 0xfffff00 |
| 0.5678E+02 | 0.2940E-01 | 0.2030E+04 | 0xfffff00 |
| 0.5807E+02 | 0.2379E-01 | 0.2030E+04 | 0xfffff00 |
| 0.5936E+02 | 0.1880E-01 | 0.2030E+04 | 0xfffff00 |
| 0.6064E+02 | 0.1533E-01 | 0.2030E+04 | 0xfffff00 |
| 0.6193E+02 | 0.1231E-01 | 0.2030E+04 | 0xfffff00 |
| 0.6322E+02 | 0.9775E-02 | 0.2030E+04 | 0xfffff00 |
| 0.6451E+02 | 0.7504E-02 | 0.2030E+04 | 0xfffff00 |
| 0.6579E+02 | 0.5545E-02 | 0.2030E+04 | 0xfffff00 |
| 0.6708E+02 | 0.4331E-02 | 0.2030E+04 | 0xfffff00 |
| 0.6837E+02 | 0.3251E-02 | 0.2030E+04 | 0xfffff00 |
| 0.6966E+02 | 0.2529E-02 | 0.2030E+04 | 0xfffff00 |
| 0.7095E+02 | 0.1974E-02 | 0.2030E+04 | 0xfffff00 |
| 0.7223E+02 | 0.1432E-02 | 0.2030E+04 | 0xfffff00 |
| 0.7352E+02 | 0.1103E-02 | 0.2030E+04 | 0xfffff00 |
| 0.7481E+02 | 0.8523E-03 | 0.2030E+04 | 0xfffff00 |
| 0.7610E+02 | 0.6263E-03 | 0.2030E+04 | 0xfffff00 |
| 0.7738E+02 | 0.4325E-03 | 0.2030E+04 | 0xfffff00 |
| 0.7867E+02 | 0.3797E-03 | 0.2030E+04 | 0xfffff00 |
| 0.7996E+02 | 0.3160E-03 | 0.2030E+04 | 0xfffff00 |
| 0.8125E+02 | 0.2122E-03 | 0.2030E+04 | 0xfffff00 |
| 0.8253E+02 | 0.1460E-03 | 0.2030E+04 | 0xfffff00 |
| 0.8382E+02 | 0.1059E-03 | 0.2030E+04 | 0xfffff00 |
| 0.8511E+02 | 0.7852E-04 | 0.2030E+04 | 0xfffff00 |
| 0.8640E+02 | 0.6972E-04 | 0.2030E+04 | 0xfffff00 |
| 0.8768E+02 | 0.5770E-04 | 0.2030E+04 | 0xfffff00 |
| 0.8897E+02 | 0.2248E-04 | 0.2030E+04 | 0xfffff00 |
| 0.9026E+02 | 0.7201E-05 | 0.2030E+04 | 0xfffff00 |
| 0.9155E+02 | 0.1931E-04 | 0.2030E+04 | 0xfffff00 |
| 0.9283E+02 | 0.1857E-04 | 0.2030E+04 | 0xfffff00 |
| 0.9412E+02 | 0.1012E-04 | 0.2030E+04 | 0xfffff00 |

V1\_Results\_baseline\_Irena.dat

|            |            |            |           |
|------------|------------|------------|-----------|
| 0.9541E+02 | 0.1325E-04 | 0.2030E+04 | 0xfffff00 |
| 0.9670E+02 | 0.1547E-04 | 0.2030E+04 | 0xfffff00 |
| 0.9798E+02 | 0.6418E-05 | 0.2030E+04 | 0xfffff00 |
| 0.9927E+02 | 0.5268E-06 | 0.2030E+04 | 0xfffff00 |
| 0.1006E+03 | 0.4285E-05 | 0.2030E+04 | 0xfffff00 |
| 0.1018E+03 | 0.4265E-05 | 0.2030E+04 | 0xfffff00 |
| 0.1031E+03 | 0.4401E-05 | 0.2030E+04 | 0xfffff00 |

|            |            |            |          |
|------------|------------|------------|----------|
| 0.2521E+02 | 0.1336E-04 | 0.2040E+04 | 0x00ffff |
| 0.2615E+02 | 0.1857E-04 | 0.2040E+04 | 0x00ffff |
| 0.2708E+02 | 0.4693E-04 | 0.2040E+04 | 0x00ffff |
| 0.2802E+02 | 0.1559E-03 | 0.2040E+04 | 0x00ffff |
| 0.2896E+02 | 0.4472E-03 | 0.2040E+04 | 0x00ffff |
| 0.2989E+02 | 0.9755E-03 | 0.2040E+04 | 0x00ffff |
| 0.3083E+02 | 0.2033E-02 | 0.2040E+04 | 0x00ffff |
| 0.3177E+02 | 0.4058E-02 | 0.2040E+04 | 0x00ffff |
| 0.3270E+02 | 0.7009E-02 | 0.2040E+04 | 0x00ffff |
| 0.3364E+02 | 0.1094E-01 | 0.2040E+04 | 0x00ffff |
| 0.3458E+02 | 0.1627E-01 | 0.2040E+04 | 0x00ffff |
| 0.3551E+02 | 0.2344E-01 | 0.2040E+04 | 0x00ffff |
| 0.3645E+02 | 0.3160E-01 | 0.2040E+04 | 0x00ffff |
| 0.3739E+02 | 0.3962E-01 | 0.2040E+04 | 0x00ffff |
| 0.3832E+02 | 0.4694E-01 | 0.2040E+04 | 0x00ffff |
| 0.3926E+02 | 0.5331E-01 | 0.2040E+04 | 0x00ffff |
| 0.4020E+02 | 0.5875E-01 | 0.2040E+04 | 0x00ffff |
| 0.4113E+02 | 0.6302E-01 | 0.2040E+04 | 0x00ffff |
| 0.4207E+02 | 0.6555E-01 | 0.2040E+04 | 0x00ffff |
| 0.4301E+02 | 0.6608E-01 | 0.2040E+04 | 0x00ffff |
| 0.4394E+02 | 0.6517E-01 | 0.2040E+04 | 0x00ffff |
| 0.4488E+02 | 0.6196E-01 | 0.2040E+04 | 0x00ffff |
| 0.4582E+02 | 0.5806E-01 | 0.2040E+04 | 0x00ffff |
| 0.4675E+02 | 0.5431E-01 | 0.2040E+04 | 0x00ffff |
| 0.4769E+02 | 0.4985E-01 | 0.2040E+04 | 0x00ffff |
| 0.4863E+02 | 0.4449E-01 | 0.2040E+04 | 0x00ffff |
| 0.4957E+02 | 0.3860E-01 | 0.2040E+04 | 0x00ffff |
| 0.5050E+02 | 0.3328E-01 | 0.2040E+04 | 0x00ffff |

## Vl\_Results\_baseline\_Irena.dat

|            |            |            |          |
|------------|------------|------------|----------|
| 0.5144E+02 | 0.2884E-01 | 0.2040E+04 | 0x00ffff |
| 0.5238E+02 | 0.2483E-01 | 0.2040E+04 | 0x00ffff |
| 0.5331E+02 | 0.2094E-01 | 0.2040E+04 | 0x00ffff |
| 0.5425E+02 | 0.1771E-01 | 0.2040E+04 | 0x00ffff |
| 0.5519E+02 | 0.1501E-01 | 0.2040E+04 | 0x00ffff |
| 0.5612E+02 | 0.1236E-01 | 0.2040E+04 | 0x00ffff |
| 0.5706E+02 | 0.9907E-02 | 0.2040E+04 | 0x00ffff |
| 0.5800E+02 | 0.8140E-02 | 0.2040E+04 | 0x00ffff |
| 0.5893E+02 | 0.6664E-02 | 0.2040E+04 | 0x00ffff |
| 0.5987E+02 | 0.5245E-02 | 0.2040E+04 | 0x00ffff |
| 0.6081E+02 | 0.4249E-02 | 0.2040E+04 | 0x00ffff |
| 0.6174E+02 | 0.3611E-02 | 0.2040E+04 | 0x00ffff |
| 0.6268E+02 | 0.2907E-02 | 0.2040E+04 | 0x00ffff |
| 0.6362E+02 | 0.2185E-02 | 0.2040E+04 | 0x00ffff |
| 0.6455E+02 | 0.1769E-02 | 0.2040E+04 | 0x00ffff |
| 0.6549E+02 | 0.1519E-02 | 0.2040E+04 | 0x00ffff |
| 0.6643E+02 | 0.1259E-02 | 0.2040E+04 | 0x00ffff |
| 0.6736E+02 | 0.9361E-03 | 0.2040E+04 | 0x00ffff |
| 0.6830E+02 | 0.6989E-03 | 0.2040E+04 | 0x00ffff |
| 0.6924E+02 | 0.5828E-03 | 0.2040E+04 | 0x00ffff |
| 0.7017E+02 | 0.4654E-03 | 0.2040E+04 | 0x00ffff |
| 0.7111E+02 | 0.3557E-03 | 0.2040E+04 | 0x00ffff |
| 0.7205E+02 | 0.2901E-03 | 0.2040E+04 | 0x00ffff |
| 0.7299E+02 | 0.2320E-03 | 0.2040E+04 | 0x00ffff |
| 0.7392E+02 | 0.1665E-03 | 0.2040E+04 | 0x00ffff |
| 0.7486E+02 | 0.9577E-04 | 0.2040E+04 | 0x00ffff |
| 0.7580E+02 | 0.7553E-04 | 0.2040E+04 | 0x00ffff |
| 0.7673E+02 | 0.9887E-04 | 0.2040E+04 | 0x00ffff |
| 0.7767E+02 | 0.1116E-03 | 0.2040E+04 | 0x00ffff |
| 0.7861E+02 | 0.8466E-04 | 0.2040E+04 | 0x00ffff |
| 0.7954E+02 | 0.4446E-04 | 0.2040E+04 | 0x00ffff |
| 0.8048E+02 | 0.2668E-04 | 0.2040E+04 | 0x00ffff |
| 0.8142E+02 | 0.3206E-04 | 0.2040E+04 | 0x00ffff |
| 0.8235E+02 | 0.3617E-04 | 0.2040E+04 | 0x00ffff |
| 0.8329E+02 | 0.2687E-04 | 0.2040E+04 | 0x00ffff |
| 0.8423E+02 | 0.2461E-04 | 0.2040E+04 | 0x00ffff |

## Vl\_Results\_baseline\_Irena.dat

|            |            |            |          |
|------------|------------|------------|----------|
| 0.8516E+02 | 0.2645E-04 | 0.2040E+04 | 0x00ffff |
| 0.8610E+02 | 0.2731E-04 | 0.2040E+04 | 0x00ffff |
| 0.8704E+02 | 0.2373E-04 | 0.2040E+04 | 0x00ffff |
| 0.8797E+02 | 0.1917E-04 | 0.2040E+04 | 0x00ffff |
| 0.8891E+02 | 0.1552E-04 | 0.2040E+04 | 0x00ffff |
| 0.8985E+02 | 0.1065E-04 | 0.2040E+04 | 0x00ffff |
| 0.9078E+02 | 0.1210E-05 | 0.2040E+04 | 0x00ffff |
| 0.9172E+02 | 0.0000E+00 | 0.2040E+04 | 0x00ffff |
| 0.9266E+02 | 0.0000E+00 | 0.2040E+04 | 0x00ffff |
| 0.9359E+02 | 0.0000E+00 | 0.2040E+04 | 0x00ffff |
| 0.9453E+02 | 0.0000E+00 | 0.2040E+04 | 0x00ffff |
| 0.9547E+02 | 0.0000E+00 | 0.2040E+04 | 0x00ffff |
| 0.9640E+02 | 0.0000E+00 | 0.2040E+04 | 0x00ffff |
| 0.9734E+02 | 0.0000E+00 | 0.2040E+04 | 0x00ffff |
| 0.9828E+02 | 0.0000E+00 | 0.2040E+04 | 0x00ffff |
| 0.9922E+02 | 0.2682E-05 | 0.2040E+04 | 0x00ffff |
| 0.1002E+03 | 0.4873E-05 | 0.2040E+04 | 0x00ffff |

|            |            |            |          |
|------------|------------|------------|----------|
| 0.2107E+02 | 0.2920E-04 | 0.2050E+04 | 0x0000ff |
| 0.2193E+02 | 0.9028E-04 | 0.2050E+04 | 0x0000ff |
| 0.2280E+02 | 0.2292E-03 | 0.2050E+04 | 0x0000ff |
| 0.2366E+02 | 0.5221E-03 | 0.2050E+04 | 0x0000ff |
| 0.2452E+02 | 0.1082E-02 | 0.2050E+04 | 0x0000ff |
| 0.2539E+02 | 0.2196E-02 | 0.2050E+04 | 0x0000ff |
| 0.2625E+02 | 0.4274E-02 | 0.2050E+04 | 0x0000ff |
| 0.2711E+02 | 0.7413E-02 | 0.2050E+04 | 0x0000ff |
| 0.2797E+02 | 0.1177E-01 | 0.2050E+04 | 0x0000ff |
| 0.2884E+02 | 0.1765E-01 | 0.2050E+04 | 0x0000ff |
| 0.2970E+02 | 0.2461E-01 | 0.2050E+04 | 0x0000ff |
| 0.3056E+02 | 0.3235E-01 | 0.2050E+04 | 0x0000ff |
| 0.3143E+02 | 0.4056E-01 | 0.2050E+04 | 0x0000ff |
| 0.3229E+02 | 0.4835E-01 | 0.2050E+04 | 0x0000ff |
| 0.3315E+02 | 0.5520E-01 | 0.2050E+04 | 0x0000ff |
| 0.3401E+02 | 0.6108E-01 | 0.2050E+04 | 0x0000ff |
| 0.3488E+02 | 0.6493E-01 | 0.2050E+04 | 0x0000ff |
| 0.3574E+02 | 0.6727E-01 | 0.2050E+04 | 0x0000ff |

## Vl\_Results\_baseline\_Irena.dat

|            |            |            |          |
|------------|------------|------------|----------|
| 0.3660E+02 | 0.6862E-01 | 0.2050E+04 | 0x0000ff |
| 0.3747E+02 | 0.6852E-01 | 0.2050E+04 | 0x0000ff |
| 0.3833E+02 | 0.6677E-01 | 0.2050E+04 | 0x0000ff |
| 0.3919E+02 | 0.6358E-01 | 0.2050E+04 | 0x0000ff |
| 0.4006E+02 | 0.5921E-01 | 0.2050E+04 | 0x0000ff |
| 0.4092E+02 | 0.5403E-01 | 0.2050E+04 | 0x0000ff |
| 0.4178E+02 | 0.4857E-01 | 0.2050E+04 | 0x0000ff |
| 0.4264E+02 | 0.4377E-01 | 0.2050E+04 | 0x0000ff |
| 0.4351E+02 | 0.3845E-01 | 0.2050E+04 | 0x0000ff |
| 0.4437E+02 | 0.3334E-01 | 0.2050E+04 | 0x0000ff |
| 0.4523E+02 | 0.2905E-01 | 0.2050E+04 | 0x0000ff |
| 0.4610E+02 | 0.2480E-01 | 0.2050E+04 | 0x0000ff |
| 0.4696E+02 | 0.2097E-01 | 0.2050E+04 | 0x0000ff |
| 0.4782E+02 | 0.1778E-01 | 0.2050E+04 | 0x0000ff |
| 0.4868E+02 | 0.1484E-01 | 0.2050E+04 | 0x0000ff |
| 0.4955E+02 | 0.1235E-01 | 0.2050E+04 | 0x0000ff |
| 0.5041E+02 | 0.1028E-01 | 0.2050E+04 | 0x0000ff |
| 0.5127E+02 | 0.8359E-02 | 0.2050E+04 | 0x0000ff |
| 0.5214E+02 | 0.6570E-02 | 0.2050E+04 | 0x0000ff |
| 0.5300E+02 | 0.5343E-02 | 0.2050E+04 | 0x0000ff |
| 0.5386E+02 | 0.4537E-02 | 0.2050E+04 | 0x0000ff |
| 0.5472E+02 | 0.3770E-02 | 0.2050E+04 | 0x0000ff |
| 0.5559E+02 | 0.2990E-02 | 0.2050E+04 | 0x0000ff |
| 0.5645E+02 | 0.2335E-02 | 0.2050E+04 | 0x0000ff |
| 0.5731E+02 | 0.1871E-02 | 0.2050E+04 | 0x0000ff |
| 0.5818E+02 | 0.1595E-02 | 0.2050E+04 | 0x0000ff |
| 0.5904E+02 | 0.1338E-02 | 0.2050E+04 | 0x0000ff |
| 0.5990E+02 | 0.1050E-02 | 0.2050E+04 | 0x0000ff |
| 0.6076E+02 | 0.8598E-03 | 0.2050E+04 | 0x0000ff |
| 0.6163E+02 | 0.7076E-03 | 0.2050E+04 | 0x0000ff |
| 0.6249E+02 | 0.5032E-03 | 0.2050E+04 | 0x0000ff |
| 0.6335E+02 | 0.4131E-03 | 0.2050E+04 | 0x0000ff |
| 0.6422E+02 | 0.3691E-03 | 0.2050E+04 | 0x0000ff |
| 0.6508E+02 | 0.3035E-03 | 0.2050E+04 | 0x0000ff |
| 0.6594E+02 | 0.2266E-03 | 0.2050E+04 | 0x0000ff |
| 0.6680E+02 | 0.1894E-03 | 0.2050E+04 | 0x0000ff |

# Vl\_Results\_baseline\_Irena.dat

|            |            |            |          |
|------------|------------|------------|----------|
| 0.6767E+02 | 0.1717E-03 | 0.2050E+04 | 0x0000ff |
| 0.6853E+02 | 0.1588E-03 | 0.2050E+04 | 0x0000ff |
| 0.6939E+02 | 0.1161E-03 | 0.2050E+04 | 0x0000ff |
| 0.7026E+02 | 0.7287E-04 | 0.2050E+04 | 0x0000ff |
| 0.7112E+02 | 0.5802E-04 | 0.2050E+04 | 0x0000ff |
| 0.7198E+02 | 0.4679E-04 | 0.2050E+04 | 0x0000ff |
| 0.7284E+02 | 0.4381E-04 | 0.2050E+04 | 0x0000ff |
| 0.7371E+02 | 0.5298E-04 | 0.2050E+04 | 0x0000ff |
| 0.7457E+02 | 0.5609E-04 | 0.2050E+04 | 0x0000ff |
| 0.7543E+02 | 0.4692E-04 | 0.2050E+04 | 0x0000ff |
| 0.7630E+02 | 0.3030E-04 | 0.2050E+04 | 0x0000ff |
| 0.7716E+02 | 0.1254E-04 | 0.2050E+04 | 0x0000ff |
| 0.7802E+02 | 0.1173E-04 | 0.2050E+04 | 0x0000ff |
| 0.7888E+02 | 0.1094E-04 | 0.2050E+04 | 0x0000ff |
| 0.7975E+02 | 0.6082E-05 | 0.2050E+04 | 0x0000ff |
| 0.8061E+02 | 0.0000E+00 | 0.2050E+04 | 0x0000ff |
| 0.8147E+02 | 0.2054E-05 | 0.2050E+04 | 0x0000ff |
| 0.8234E+02 | 0.6897E-05 | 0.2050E+04 | 0x0000ff |
| 0.8320E+02 | 0.1894E-04 | 0.2050E+04 | 0x0000ff |
| 0.8406E+02 | 0.2407E-04 | 0.2050E+04 | 0x0000ff |
| 0.8493E+02 | 0.1898E-04 | 0.2050E+04 | 0x0000ff |
| 0.8579E+02 | 0.7850E-05 | 0.2050E+04 | 0x0000ff |
| 0.8665E+02 | 0.7872E-05 | 0.2050E+04 | 0x0000ff |
| 0.8751E+02 | 0.4763E-05 | 0.2050E+04 | 0x0000ff |
| 0.8838E+02 | 0.1418E-05 | 0.2050E+04 | 0x0000ff |
| 0.8924E+02 | 0.2972E-05 | 0.2050E+04 | 0x0000ff |
| 0.9010E+02 | 0.5096E-05 | 0.2050E+04 | 0x0000ff |

# \*\*\*\*\* Standardised \*\*\*\*\*

|            |             |            |             |            |             |            |             |
|------------|-------------|------------|-------------|------------|-------------|------------|-------------|
| -200       | -0.2991E+01 | 0.1182E-03 | -0.2889E+01 | 0.7914E-04 | -0.3029E+01 | 0.8640E-04 | -0.2833E+01 |
| 0.1807E-03 |             |            |             |            |             |            |             |
| -195       | -0.2860E+01 | 0.2777E-03 | -0.2759E+01 | 0.2602E-03 | -0.2885E+01 | 0.1201E-03 | -0.2693E+01 |
| 0.5587E-03 |             |            |             |            |             |            |             |
| -190       | -0.2728E+01 | 0.5322E-03 | -0.2630E+01 | 0.8592E-03 | -0.2740E+01 | 0.3036E-03 | -0.2554E+01 |
| 0.1419E-02 |             |            |             |            |             |            |             |

# V1\_Results\_baseline\_Irena.dat

|            |             |            |             |            |             |            |             |
|------------|-------------|------------|-------------|------------|-------------|------------|-------------|
| -185       | -0.2597E+01 | 0.1222E-02 | -0.2501E+01 | 0.2189E-02 | -0.2595E+01 | 0.1008E-02 | -0.2414E+01 |
| 0.3231E-02 |             |            |             |            |             |            |             |
| -180       | -0.2466E+01 | 0.2942E-02 | -0.2372E+01 | 0.4702E-02 | -0.2450E+01 | 0.2893E-02 | -0.2275E+01 |
| 0.6699E-02 |             |            |             |            |             |            |             |
| -175       | -0.2335E+01 | 0.6400E-02 | -0.2243E+01 | 0.9548E-02 | -0.2305E+01 | 0.6311E-02 | -0.2135E+01 |
| 0.1359E-01 |             |            |             |            |             |            |             |
| -170       | -0.2204E+01 | 0.1168E-01 | -0.2114E+01 | 0.1786E-01 | -0.2161E+01 | 0.1315E-01 | -0.1996E+01 |
| 0.2645E-01 |             |            |             |            |             |            |             |
| -165       | -0.2073E+01 | 0.2056E-01 | -0.1985E+01 | 0.3007E-01 | -0.2016E+01 | 0.2625E-01 | -0.1856E+01 |
| 0.4588E-01 |             |            |             |            |             |            |             |
| -160       | -0.1942E+01 | 0.3587E-01 | -0.1855E+01 | 0.4840E-01 | -0.1871E+01 | 0.4534E-01 | -0.1717E+01 |
| 0.7285E-01 |             |            |             |            |             |            |             |
| -155       | -0.1811E+01 | 0.5799E-01 | -0.1726E+01 | 0.7393E-01 | -0.1726E+01 | 0.7080E-01 | -0.1578E+01 |
| 0.1092E+00 |             |            |             |            |             |            |             |
| -150       | -0.1680E+01 | 0.8604E-01 | -0.1597E+01 | 0.1072E+00 | -0.1581E+01 | 0.1052E+00 | -0.1438E+01 |
| 0.1523E+00 |             |            |             |            |             |            |             |
| -145       | -0.1549E+01 | 0.1192E+00 | -0.1468E+01 | 0.1441E+00 | -0.1437E+01 | 0.1516E+00 | -0.1299E+01 |
| 0.2002E+00 |             |            |             |            |             |            |             |
| -140       | -0.1418E+01 | 0.1578E+00 | -0.1339E+01 | 0.1844E+00 | -0.1292E+01 | 0.2044E+00 | -0.1159E+01 |
| 0.2510E+00 |             |            |             |            |             |            |             |
| -135       | -0.1287E+01 | 0.2002E+00 | -0.1210E+01 | 0.2276E+00 | -0.1147E+01 | 0.2563E+00 | -0.1020E+01 |
| 0.2992E+00 |             |            |             |            |             |            |             |
| -130       | -0.1156E+01 | 0.2440E+00 | -0.1081E+01 | 0.2738E+00 | -0.1002E+01 | 0.3036E+00 | -0.8804E+00 |
| 0.3416E+00 |             |            |             |            |             |            |             |
| -125       | -0.1025E+01 | 0.2889E+00 | -0.9515E+00 | 0.3162E+00 | -0.8574E+00 | 0.3448E+00 | -0.7410E+00 |
| 0.3780E+00 |             |            |             |            |             |            |             |
| -120       | -0.8934E+00 | 0.3313E+00 | -0.8224E+00 | 0.3532E+00 | -0.7125E+00 | 0.3801E+00 | -0.6015E+00 |
| 0.4018E+00 |             |            |             |            |             |            |             |
| -115       | -0.7624E+00 | 0.3684E+00 | -0.6933E+00 | 0.3832E+00 | -0.5677E+00 | 0.4077E+00 | -0.4621E+00 |
| 0.4163E+00 |             |            |             |            |             |            |             |
| -110       | -0.6313E+00 | 0.3977E+00 | -0.5641E+00 | 0.4073E+00 | -0.4229E+00 | 0.4241E+00 | -0.3227E+00 |
| 0.4247E+00 |             |            |             |            |             |            |             |
| -105       | -0.5002E+00 | 0.4161E+00 | -0.4350E+00 | 0.4230E+00 | -0.2781E+00 | 0.4275E+00 | -0.1832E+00 |
| 0.4240E+00 |             |            |             |            |             |            |             |
| -100       | -0.3691E+00 | 0.4245E+00 | -0.3059E+00 | 0.4289E+00 | -0.1333E+00 | 0.4216E+00 | -0.4378E-01 |
| 0.4132E+00 |             |            |             |            |             |            |             |

# V1\_Results\_baseline\_Irena.dat

|            |             |            |             |            |            |            |            |
|------------|-------------|------------|-------------|------------|------------|------------|------------|
| -95        | -0.2381E+00 | 0.4262E+00 | -0.1767E+00 | 0.4221E+00 | 0.1150E-01 | 0.4008E+00 | 0.9566E-01 |
| 0.3934E+00 |             |            |             |            |            |            |            |
| -90        | -0.1070E+00 | 0.4190E+00 | -0.4761E-01 | 0.4076E+00 | 0.1563E+00 | 0.3756E+00 | 0.2351E+00 |
| 0.3664E+00 |             |            |             |            |            |            |            |
| -85        | 0.2408E-01  | 0.4021E+00 | 0.8152E-01  | 0.3894E+00 | 0.3011E+00 | 0.3514E+00 | 0.3745E+00 |
| 0.3344E+00 |             |            |             |            |            |            |            |
| -80        | 0.1552E+00  | 0.3823E+00 | 0.2107E+00  | 0.3677E+00 | 0.4459E+00 | 0.3225E+00 | 0.5140E+00 |
| 0.3005E+00 |             |            |             |            |            |            |            |
| -75        | 0.2862E+00  | 0.3563E+00 | 0.3398E+00  | 0.3382E+00 | 0.5907E+00 | 0.2878E+00 | 0.6534E+00 |
| 0.2709E+00 |             |            |             |            |            |            |            |
| -70        | 0.4173E+00  | 0.3257E+00 | 0.4689E+00  | 0.3095E+00 | 0.7355E+00 | 0.2497E+00 | 0.7929E+00 |
| 0.2379E+00 |             |            |             |            |            |            |            |
| -65        | 0.5484E+00  | 0.2942E+00 | 0.5981E+00  | 0.2818E+00 | 0.8803E+00 | 0.2153E+00 | 0.9323E+00 |
| 0.2063E+00 |             |            |             |            |            |            |            |
| -60        | 0.6795E+00  | 0.2645E+00 | 0.7272E+00  | 0.2561E+00 | 0.1025E+01 | 0.1865E+00 | 0.1072E+01 |
| 0.1798E+00 |             |            |             |            |            |            |            |
| -55        | 0.8105E+00  | 0.2337E+00 | 0.8563E+00  | 0.2294E+00 | 0.1170E+01 | 0.1606E+00 | 0.1211E+01 |
| 0.1535E+00 |             |            |             |            |            |            |            |
| -50        | 0.9416E+00  | 0.2052E+00 | 0.9854E+00  | 0.2037E+00 | 0.1315E+01 | 0.1355E+00 | 0.1351E+01 |
| 0.1298E+00 |             |            |             |            |            |            |            |
| -45        | 0.1073E+01  | 0.1790E+00 | 0.1115E+01  | 0.1748E+00 | 0.1460E+01 | 0.1146E+00 | 0.1490E+01 |
| 0.1100E+00 |             |            |             |            |            |            |            |
| -40        | 0.1204E+01  | 0.1566E+00 | 0.1244E+01  | 0.1474E+00 | 0.1604E+01 | 0.9707E-01 | 0.1629E+01 |
| 0.9185E-01 |             |            |             |            |            |            |            |
| -35        | 0.1335E+01  | 0.1350E+00 | 0.1373E+01  | 0.1256E+00 | 0.1749E+01 | 0.7994E-01 | 0.1769E+01 |
| 0.7643E-01 |             |            |             |            |            |            |            |
| -30        | 0.1466E+01  | 0.1139E+00 | 0.1502E+01  | 0.1088E+00 | 0.1894E+01 | 0.6409E-01 | 0.1908E+01 |
| 0.6363E-01 |             |            |             |            |            |            |            |
| -25        | 0.1597E+01  | 0.9688E-01 | 0.1631E+01  | 0.9334E-01 | 0.2039E+01 | 0.5266E-01 | 0.2048E+01 |
| 0.5173E-01 |             |            |             |            |            |            |            |
| -20        | 0.1728E+01  | 0.8275E-01 | 0.1760E+01  | 0.7861E-01 | 0.2184E+01 | 0.4311E-01 | 0.2187E+01 |
| 0.4066E-01 |             |            |             |            |            |            |            |
| -15        | 0.1859E+01  | 0.7044E-01 | 0.1889E+01  | 0.6679E-01 | 0.2328E+01 | 0.3393E-01 | 0.2327E+01 |
| 0.3306E-01 |             |            |             |            |            |            |            |
| -10        | 0.1990E+01  | 0.5780E-01 | 0.2019E+01  | 0.5516E-01 | 0.2473E+01 | 0.2749E-01 | 0.2466E+01 |
| 0.2807E-01 |             |            |             |            |            |            |            |

V1\_Results\_baseline\_Irena.dat

|            |            |            |            |            |            |            |            |
|------------|------------|------------|------------|------------|------------|------------|------------|
| -5         | 0.2121E+01 | 0.4698E-01 | 0.2148E+01 | 0.4455E-01 | 0.2618E+01 | 0.2336E-01 | 0.2606E+01 |
| 0.2333E-01 |            |            |            |            |            |            |            |
| 0          | 0.2252E+01 | 0.3746E-01 | 0.2277E+01 | 0.3642E-01 | 0.2763E+01 | 0.1881E-01 | 0.2745E+01 |
| 0.1850E-01 |            |            |            |            |            |            |            |
| 5          | 0.2383E+01 | 0.3075E-01 | 0.2406E+01 | 0.3049E-01 | 0.2908E+01 | 0.1414E-01 | 0.2884E+01 |
| 0.1445E-01 |            |            |            |            |            |            |            |
| 10         | 0.2515E+01 | 0.2563E-01 | 0.2535E+01 | 0.2476E-01 | 0.3052E+01 | 0.1144E-01 | 0.3024E+01 |
| 0.1158E-01 |            |            |            |            |            |            |            |
| 15         | 0.2646E+01 | 0.2114E-01 | 0.2664E+01 | 0.2036E-01 | 0.3197E+01 | 0.9830E-02 | 0.3163E+01 |
| 0.9868E-02 |            |            |            |            |            |            |            |
| 20         | 0.2777E+01 | 0.1707E-01 | 0.2793E+01 | 0.1724E-01 | 0.3342E+01 | 0.8145E-02 | 0.3303E+01 |
| 0.8278E-02 |            |            |            |            |            |            |            |
| 25         | 0.2908E+01 | 0.1367E-01 | 0.2922E+01 | 0.1443E-01 | 0.3487E+01 | 0.6056E-02 | 0.3442E+01 |
| 0.6495E-02 |            |            |            |            |            |            |            |
| 30         | 0.3039E+01 | 0.1130E-01 | 0.3052E+01 | 0.1142E-01 | 0.3632E+01 | 0.4521E-02 | 0.3582E+01 |
| 0.5320E-02 |            |            |            |            |            |            |            |
| 35         | 0.3170E+01 | 0.9615E-02 | 0.3181E+01 | 0.9219E-02 | 0.3777E+01 | 0.3770E-02 | 0.3721E+01 |
| 0.4379E-02 |            |            |            |            |            |            |            |
| 40         | 0.3301E+01 | 0.7613E-02 | 0.3310E+01 | 0.7708E-02 | 0.3921E+01 | 0.3011E-02 | 0.3861E+01 |
| 0.3114E-02 |            |            |            |            |            |            |            |
| 45         | 0.3432E+01 | 0.5755E-02 | 0.3439E+01 | 0.6497E-02 | 0.4066E+01 | 0.2301E-02 | 0.4000E+01 |
| 0.2557E-02 |            |            |            |            |            |            |            |
| 50         | 0.3563E+01 | 0.4628E-02 | 0.3568E+01 | 0.5143E-02 | 0.4211E+01 | 0.1877E-02 | 0.4139E+01 |
| 0.2284E-02 |            |            |            |            |            |            |            |
| 55         | 0.3694E+01 | 0.4084E-02 | 0.3697E+01 | 0.4203E-02 | 0.4356E+01 | 0.1501E-02 | 0.4279E+01 |
| 0.1878E-02 |            |            |            |            |            |            |            |
| 60         | 0.3825E+01 | 0.3520E-02 | 0.3826E+01 | 0.3134E-02 | 0.4501E+01 | 0.1077E-02 | 0.4418E+01 |
| 0.1403E-02 |            |            |            |            |            |            |            |
| 65         | 0.3956E+01 | 0.3026E-02 | 0.3956E+01 | 0.2843E-02 | 0.4645E+01 | 0.6196E-03 | 0.4558E+01 |
| 0.1172E-02 |            |            |            |            |            |            |            |
| 70         | 0.4087E+01 | 0.2506E-02 | 0.4085E+01 | 0.2557E-02 | 0.4790E+01 | 0.4886E-03 | 0.4697E+01 |
| 0.1063E-02 |            |            |            |            |            |            |            |
| 75         | 0.4218E+01 | 0.1918E-02 | 0.4214E+01 | 0.2190E-02 | 0.4935E+01 | 0.6396E-03 | 0.4837E+01 |
| 0.9830E-03 |            |            |            |            |            |            |            |
| 80         | 0.4350E+01 | 0.1502E-02 | 0.4343E+01 | 0.1642E-02 | 0.5080E+01 | 0.7218E-03 | 0.4976E+01 |
| 0.7187E-03 |            |            |            |            |            |            |            |

V1\_Results\_baseline\_Irena.dat

|            |            |            |            |            |            |            |            |
|------------|------------|------------|------------|------------|------------|------------|------------|
| 85         | 0.4481E+01 | 0.1398E-02 | 0.4472E+01 | 0.1244E-02 | 0.5225E+01 | 0.5477E-03 | 0.5115E+01 |
| 0.4509E-03 |            |            |            |            |            |            |            |
| 90         | 0.4612E+01 | 0.1196E-02 | 0.4601E+01 | 0.9948E-03 | 0.5369E+01 | 0.2876E-03 | 0.5255E+01 |
| 0.3590E-03 |            |            |            |            |            |            |            |
| 95         | 0.4743E+01 | 0.8293E-03 | 0.4730E+01 | 0.7689E-03 | 0.5514E+01 | 0.1726E-03 | 0.5394E+01 |
| 0.2895E-03 |            |            |            |            |            |            |            |
| 100        | 0.4874E+01 | 0.4982E-03 | 0.4859E+01 | 0.6105E-03 | 0.5659E+01 | 0.2074E-03 | 0.5534E+01 |
| 0.2711E-03 |            |            |            |            |            |            |            |
| 105        | 0.5005E+01 | 0.4534E-03 | 0.4989E+01 | 0.5269E-03 | 0.5804E+01 | 0.2340E-03 | 0.5673E+01 |
| 0.3278E-03 |            |            |            |            |            |            |            |
| 110        | 0.5136E+01 | 0.4670E-03 | 0.5118E+01 | 0.4981E-03 | 0.5949E+01 | 0.1739E-03 | 0.5813E+01 |
| 0.3471E-03 |            |            |            |            |            |            |            |
| 115        | 0.5267E+01 | 0.4623E-03 | 0.5247E+01 | 0.4529E-03 | 0.6093E+01 | 0.1592E-03 | 0.5952E+01 |
| 0.2903E-03 |            |            |            |            |            |            |            |
| 120        | 0.5398E+01 | 0.3694E-03 | 0.5376E+01 | 0.2813E-03 | 0.6238E+01 | 0.1711E-03 | 0.6092E+01 |
| 0.1875E-03 |            |            |            |            |            |            |            |
| 125        | 0.5529E+01 | 0.3201E-03 | 0.5505E+01 | 0.1073E-03 | 0.6383E+01 | 0.1767E-03 | 0.6231E+01 |
| 0.7759E-04 |            |            |            |            |            |            |            |
| 130        | 0.5660E+01 | 0.2936E-03 | 0.5634E+01 | 0.5164E-04 | 0.6528E+01 | 0.1535E-03 | 0.6370E+01 |
| 0.7257E-04 |            |            |            |            |            |            |            |
| 135        | 0.5791E+01 | 0.2977E-03 | 0.5763E+01 | 0.1192E-03 | 0.6673E+01 | 0.1240E-03 | 0.6510E+01 |
| 0.6770E-04 |            |            |            |            |            |            |            |
| 140        | 0.5922E+01 | 0.1985E-03 | 0.5892E+01 | 0.1464E-03 | 0.6817E+01 | 0.1004E-03 | 0.6649E+01 |
| 0.3764E-04 |            |            |            |            |            |            |            |
| 145        | 0.6054E+01 | 0.1502E-03 | 0.6022E+01 | 0.1282E-03 | 0.6962E+01 | 0.6888E-04 | 0.6789E+01 |
| 0.0000E+00 |            |            |            |            |            |            |            |
| 150        | 0.6185E+01 | 0.1181E-03 | 0.6151E+01 | 0.7688E-04 | 0.7107E+01 | 0.7827E-05 | 0.6928E+01 |
| 0.1271E-04 |            |            |            |            |            |            |            |
| 155        | 0.6316E+01 | 0.8774E-04 | 0.6280E+01 | 0.8845E-04 | 0.7252E+01 | 0.0000E+00 | 0.7068E+01 |
| 0.4268E-04 |            |            |            |            |            |            |            |
| 160        | 0.6447E+01 | 0.4306E-04 | 0.6409E+01 | 0.9635E-04 | 0.7397E+01 | 0.0000E+00 | 0.7207E+01 |
| 0.1172E-03 |            |            |            |            |            |            |            |
| 165        | 0.6578E+01 | 0.4386E-04 | 0.6538E+01 | 0.1105E-03 | 0.7542E+01 | 0.0000E+00 | 0.7346E+01 |
| 0.1489E-03 |            |            |            |            |            |            |            |
| 170        | 0.6709E+01 | 0.4196E-04 | 0.6667E+01 | 0.6608E-04 | 0.7686E+01 | 0.0000E+00 | 0.7486E+01 |
| 0.1175E-03 |            |            |            |            |            |            |            |

```

                                V1_Results_baseline_Irena.dat
  175  0.6840E+01  0.8138E-04  0.6796E+01  0.1693E-04  0.7831E+01  0.0000E+00  0.7625E+01
0.4858E-04
  180  0.6971E+01  0.9754E-04  0.6926E+01  0.1050E-04  0.7976E+01  0.0000E+00  0.7765E+01
0.4871E-04
  185  0.7102E+01  0.8489E-04  0.7055E+01  0.2931E-04  0.8121E+01  0.0000E+00  0.7904E+01
0.2947E-04
  190  0.7233E+01  0.6423E-04  0.7184E+01  0.2931E-04  0.8266E+01  0.0000E+00  0.8044E+01
0.8773E-05
  195  0.7364E+01  0.7979E-04  0.7313E+01  0.3076E-04  0.8410E+01  0.1735E-04  0.8183E+01
0.1839E-04
  200  0.7495E+01  0.5814E-04  0.7442E+01  0.3157E-04  0.8555E+01  0.3152E-04  0.8323E+01
0.3153E-04

```

```

#      *****      adaptados para un plot en 3D con gnuplot      *****

```

```

-0.2991E+01  0.1182E-03  0.2020E+04
-0.2860E+01  0.2777E-03  0.2020E+04
-0.2728E+01  0.5322E-03  0.2020E+04
-0.2597E+01  0.1222E-02  0.2020E+04
-0.2466E+01  0.2942E-02  0.2020E+04
-0.2335E+01  0.6400E-02  0.2020E+04
-0.2204E+01  0.1168E-01  0.2020E+04
-0.2073E+01  0.2056E-01  0.2020E+04
-0.1942E+01  0.3587E-01  0.2020E+04
-0.1811E+01  0.5799E-01  0.2020E+04
-0.1680E+01  0.8604E-01  0.2020E+04
-0.1549E+01  0.1192E+00  0.2020E+04
-0.1418E+01  0.1578E+00  0.2020E+04
-0.1287E+01  0.2002E+00  0.2020E+04
-0.1156E+01  0.2440E+00  0.2020E+04
-0.1025E+01  0.2889E+00  0.2020E+04
-0.8934E+00  0.3313E+00  0.2020E+04
-0.7624E+00  0.3684E+00  0.2020E+04
-0.6313E+00  0.3977E+00  0.2020E+04
-0.5002E+00  0.4161E+00  0.2020E+04
-0.3691E+00  0.4245E+00  0.2020E+04

```

V1\_Results\_baseline\_Irena.dat

|             |            |            |
|-------------|------------|------------|
| -0.2381E+00 | 0.4262E+00 | 0.2020E+04 |
| -0.1070E+00 | 0.4190E+00 | 0.2020E+04 |
| 0.2408E-01  | 0.4021E+00 | 0.2020E+04 |
| 0.1552E+00  | 0.3823E+00 | 0.2020E+04 |
| 0.2862E+00  | 0.3563E+00 | 0.2020E+04 |
| 0.4173E+00  | 0.3257E+00 | 0.2020E+04 |
| 0.5484E+00  | 0.2942E+00 | 0.2020E+04 |
| 0.6795E+00  | 0.2645E+00 | 0.2020E+04 |
| 0.8105E+00  | 0.2337E+00 | 0.2020E+04 |
| 0.9416E+00  | 0.2052E+00 | 0.2020E+04 |
| 0.1073E+01  | 0.1790E+00 | 0.2020E+04 |
| 0.1204E+01  | 0.1566E+00 | 0.2020E+04 |
| 0.1335E+01  | 0.1350E+00 | 0.2020E+04 |
| 0.1466E+01  | 0.1139E+00 | 0.2020E+04 |
| 0.1597E+01  | 0.9688E-01 | 0.2020E+04 |
| 0.1728E+01  | 0.8275E-01 | 0.2020E+04 |
| 0.1859E+01  | 0.7044E-01 | 0.2020E+04 |
| 0.1990E+01  | 0.5780E-01 | 0.2020E+04 |
| 0.2121E+01  | 0.4698E-01 | 0.2020E+04 |
| 0.2252E+01  | 0.3746E-01 | 0.2020E+04 |
| 0.2383E+01  | 0.3075E-01 | 0.2020E+04 |
| 0.2515E+01  | 0.2563E-01 | 0.2020E+04 |
| 0.2646E+01  | 0.2114E-01 | 0.2020E+04 |
| 0.2777E+01  | 0.1707E-01 | 0.2020E+04 |
| 0.2908E+01  | 0.1367E-01 | 0.2020E+04 |
| 0.3039E+01  | 0.1130E-01 | 0.2020E+04 |
| 0.3170E+01  | 0.9615E-02 | 0.2020E+04 |
| 0.3301E+01  | 0.7613E-02 | 0.2020E+04 |
| 0.3432E+01  | 0.5755E-02 | 0.2020E+04 |
| 0.3563E+01  | 0.4628E-02 | 0.2020E+04 |
| 0.3694E+01  | 0.4084E-02 | 0.2020E+04 |
| 0.3825E+01  | 0.3520E-02 | 0.2020E+04 |
| 0.3956E+01  | 0.3026E-02 | 0.2020E+04 |
| 0.4087E+01  | 0.2506E-02 | 0.2020E+04 |
| 0.4218E+01  | 0.1918E-02 | 0.2020E+04 |
| 0.4350E+01  | 0.1502E-02 | 0.2020E+04 |

V1\_Results\_baseline\_Irena.dat

|             |            |            |
|-------------|------------|------------|
| 0.4481E+01  | 0.1398E-02 | 0.2020E+04 |
| 0.4612E+01  | 0.1196E-02 | 0.2020E+04 |
| 0.4743E+01  | 0.8293E-03 | 0.2020E+04 |
| 0.4874E+01  | 0.4982E-03 | 0.2020E+04 |
| 0.5005E+01  | 0.4534E-03 | 0.2020E+04 |
| 0.5136E+01  | 0.4670E-03 | 0.2020E+04 |
| 0.5267E+01  | 0.4623E-03 | 0.2020E+04 |
| 0.5398E+01  | 0.3694E-03 | 0.2020E+04 |
| 0.5529E+01  | 0.3201E-03 | 0.2020E+04 |
| 0.5660E+01  | 0.2936E-03 | 0.2020E+04 |
| 0.5791E+01  | 0.2977E-03 | 0.2020E+04 |
| 0.5922E+01  | 0.1985E-03 | 0.2020E+04 |
| 0.6054E+01  | 0.1502E-03 | 0.2020E+04 |
| 0.6185E+01  | 0.1181E-03 | 0.2020E+04 |
| 0.6316E+01  | 0.8774E-04 | 0.2020E+04 |
| 0.6447E+01  | 0.4306E-04 | 0.2020E+04 |
| 0.6578E+01  | 0.4386E-04 | 0.2020E+04 |
| 0.6709E+01  | 0.4196E-04 | 0.2020E+04 |
| 0.6840E+01  | 0.8138E-04 | 0.2020E+04 |
| 0.6971E+01  | 0.9754E-04 | 0.2020E+04 |
| 0.7102E+01  | 0.8489E-04 | 0.2020E+04 |
| 0.7233E+01  | 0.6423E-04 | 0.2020E+04 |
| 0.7364E+01  | 0.7979E-04 | 0.2020E+04 |
| 0.7495E+01  | 0.5814E-04 | 0.2020E+04 |
|             |            |            |
| -0.2889E+01 | 0.7914E-04 | 0.2030E+04 |
| -0.2759E+01 | 0.2602E-03 | 0.2030E+04 |
| -0.2630E+01 | 0.8592E-03 | 0.2030E+04 |
| -0.2501E+01 | 0.2189E-02 | 0.2030E+04 |
| -0.2372E+01 | 0.4702E-02 | 0.2030E+04 |
| -0.2243E+01 | 0.9548E-02 | 0.2030E+04 |
| -0.2114E+01 | 0.1786E-01 | 0.2030E+04 |
| -0.1985E+01 | 0.3007E-01 | 0.2030E+04 |
| -0.1855E+01 | 0.4840E-01 | 0.2030E+04 |
| -0.1726E+01 | 0.7393E-01 | 0.2030E+04 |
| -0.1597E+01 | 0.1072E+00 | 0.2030E+04 |

V1\_Results\_baseline\_Irena.dat

|             |            |            |
|-------------|------------|------------|
| -0.1468E+01 | 0.1441E+00 | 0.2030E+04 |
| -0.1339E+01 | 0.1844E+00 | 0.2030E+04 |
| -0.1210E+01 | 0.2276E+00 | 0.2030E+04 |
| -0.1081E+01 | 0.2738E+00 | 0.2030E+04 |
| -0.9515E+00 | 0.3162E+00 | 0.2030E+04 |
| -0.8224E+00 | 0.3532E+00 | 0.2030E+04 |
| -0.6933E+00 | 0.3832E+00 | 0.2030E+04 |
| -0.5641E+00 | 0.4073E+00 | 0.2030E+04 |
| -0.4350E+00 | 0.4230E+00 | 0.2030E+04 |
| -0.3059E+00 | 0.4289E+00 | 0.2030E+04 |
| -0.1767E+00 | 0.4221E+00 | 0.2030E+04 |
| -0.4761E-01 | 0.4076E+00 | 0.2030E+04 |
| 0.8152E-01  | 0.3894E+00 | 0.2030E+04 |
| 0.2107E+00  | 0.3677E+00 | 0.2030E+04 |
| 0.3398E+00  | 0.3382E+00 | 0.2030E+04 |
| 0.4689E+00  | 0.3095E+00 | 0.2030E+04 |
| 0.5981E+00  | 0.2818E+00 | 0.2030E+04 |
| 0.7272E+00  | 0.2561E+00 | 0.2030E+04 |
| 0.8563E+00  | 0.2294E+00 | 0.2030E+04 |
| 0.9854E+00  | 0.2037E+00 | 0.2030E+04 |
| 0.1115E+01  | 0.1748E+00 | 0.2030E+04 |
| 0.1244E+01  | 0.1474E+00 | 0.2030E+04 |
| 0.1373E+01  | 0.1256E+00 | 0.2030E+04 |
| 0.1502E+01  | 0.1088E+00 | 0.2030E+04 |
| 0.1631E+01  | 0.9334E-01 | 0.2030E+04 |
| 0.1760E+01  | 0.7861E-01 | 0.2030E+04 |
| 0.1889E+01  | 0.6679E-01 | 0.2030E+04 |
| 0.2019E+01  | 0.5516E-01 | 0.2030E+04 |
| 0.2148E+01  | 0.4455E-01 | 0.2030E+04 |
| 0.2277E+01  | 0.3642E-01 | 0.2030E+04 |
| 0.2406E+01  | 0.3049E-01 | 0.2030E+04 |
| 0.2535E+01  | 0.2476E-01 | 0.2030E+04 |
| 0.2664E+01  | 0.2036E-01 | 0.2030E+04 |
| 0.2793E+01  | 0.1724E-01 | 0.2030E+04 |
| 0.2922E+01  | 0.1443E-01 | 0.2030E+04 |
| 0.3052E+01  | 0.1142E-01 | 0.2030E+04 |

V1\_Results\_baseline\_Irena.dat

|             |            |            |
|-------------|------------|------------|
| 0.3181E+01  | 0.9219E-02 | 0.2030E+04 |
| 0.3310E+01  | 0.7708E-02 | 0.2030E+04 |
| 0.3439E+01  | 0.6497E-02 | 0.2030E+04 |
| 0.3568E+01  | 0.5143E-02 | 0.2030E+04 |
| 0.3697E+01  | 0.4203E-02 | 0.2030E+04 |
| 0.3826E+01  | 0.3134E-02 | 0.2030E+04 |
| 0.3956E+01  | 0.2843E-02 | 0.2030E+04 |
| 0.4085E+01  | 0.2557E-02 | 0.2030E+04 |
| 0.4214E+01  | 0.2190E-02 | 0.2030E+04 |
| 0.4343E+01  | 0.1642E-02 | 0.2030E+04 |
| 0.4472E+01  | 0.1244E-02 | 0.2030E+04 |
| 0.4601E+01  | 0.9948E-03 | 0.2030E+04 |
| 0.4730E+01  | 0.7689E-03 | 0.2030E+04 |
| 0.4859E+01  | 0.6105E-03 | 0.2030E+04 |
| 0.4989E+01  | 0.5269E-03 | 0.2030E+04 |
| 0.5118E+01  | 0.4981E-03 | 0.2030E+04 |
| 0.5247E+01  | 0.4529E-03 | 0.2030E+04 |
| 0.5376E+01  | 0.2813E-03 | 0.2030E+04 |
| 0.5505E+01  | 0.1073E-03 | 0.2030E+04 |
| 0.5634E+01  | 0.5164E-04 | 0.2030E+04 |
| 0.5763E+01  | 0.1192E-03 | 0.2030E+04 |
| 0.5892E+01  | 0.1464E-03 | 0.2030E+04 |
| 0.6022E+01  | 0.1282E-03 | 0.2030E+04 |
| 0.6151E+01  | 0.7688E-04 | 0.2030E+04 |
| 0.6280E+01  | 0.8845E-04 | 0.2030E+04 |
| 0.6409E+01  | 0.9635E-04 | 0.2030E+04 |
| 0.6538E+01  | 0.1105E-03 | 0.2030E+04 |
| 0.6667E+01  | 0.6608E-04 | 0.2030E+04 |
| 0.6796E+01  | 0.1693E-04 | 0.2030E+04 |
| 0.6926E+01  | 0.1050E-04 | 0.2030E+04 |
| 0.7055E+01  | 0.2931E-04 | 0.2030E+04 |
| 0.7184E+01  | 0.2931E-04 | 0.2030E+04 |
| 0.7313E+01  | 0.3076E-04 | 0.2030E+04 |
| 0.7442E+01  | 0.3157E-04 | 0.2030E+04 |
| -0.3029E+01 | 0.8640E-04 | 0.2040E+04 |

V1\_Results\_baseline\_Irena.dat

|             |            |            |
|-------------|------------|------------|
| -0.2885E+01 | 0.1201E-03 | 0.2040E+04 |
| -0.2740E+01 | 0.3036E-03 | 0.2040E+04 |
| -0.2595E+01 | 0.1008E-02 | 0.2040E+04 |
| -0.2450E+01 | 0.2893E-02 | 0.2040E+04 |
| -0.2305E+01 | 0.6311E-02 | 0.2040E+04 |
| -0.2161E+01 | 0.1315E-01 | 0.2040E+04 |
| -0.2016E+01 | 0.2625E-01 | 0.2040E+04 |
| -0.1871E+01 | 0.4534E-01 | 0.2040E+04 |
| -0.1726E+01 | 0.7080E-01 | 0.2040E+04 |
| -0.1581E+01 | 0.1052E+00 | 0.2040E+04 |
| -0.1437E+01 | 0.1516E+00 | 0.2040E+04 |
| -0.1292E+01 | 0.2044E+00 | 0.2040E+04 |
| -0.1147E+01 | 0.2563E+00 | 0.2040E+04 |
| -0.1002E+01 | 0.3036E+00 | 0.2040E+04 |
| -0.8574E+00 | 0.3448E+00 | 0.2040E+04 |
| -0.7125E+00 | 0.3801E+00 | 0.2040E+04 |
| -0.5677E+00 | 0.4077E+00 | 0.2040E+04 |
| -0.4229E+00 | 0.4241E+00 | 0.2040E+04 |
| -0.2781E+00 | 0.4275E+00 | 0.2040E+04 |
| -0.1333E+00 | 0.4216E+00 | 0.2040E+04 |
| 0.1150E-01  | 0.4008E+00 | 0.2040E+04 |
| 0.1563E+00  | 0.3756E+00 | 0.2040E+04 |
| 0.3011E+00  | 0.3514E+00 | 0.2040E+04 |
| 0.4459E+00  | 0.3225E+00 | 0.2040E+04 |
| 0.5907E+00  | 0.2878E+00 | 0.2040E+04 |
| 0.7355E+00  | 0.2497E+00 | 0.2040E+04 |
| 0.8803E+00  | 0.2153E+00 | 0.2040E+04 |
| 0.1025E+01  | 0.1865E+00 | 0.2040E+04 |
| 0.1170E+01  | 0.1606E+00 | 0.2040E+04 |
| 0.1315E+01  | 0.1355E+00 | 0.2040E+04 |
| 0.1460E+01  | 0.1146E+00 | 0.2040E+04 |
| 0.1604E+01  | 0.9707E-01 | 0.2040E+04 |
| 0.1749E+01  | 0.7994E-01 | 0.2040E+04 |
| 0.1894E+01  | 0.6409E-01 | 0.2040E+04 |
| 0.2039E+01  | 0.5266E-01 | 0.2040E+04 |
| 0.2184E+01  | 0.4311E-01 | 0.2040E+04 |

V1\_Results\_baseline\_Irena.dat

|            |            |            |
|------------|------------|------------|
| 0.2328E+01 | 0.3393E-01 | 0.2040E+04 |
| 0.2473E+01 | 0.2749E-01 | 0.2040E+04 |
| 0.2618E+01 | 0.2336E-01 | 0.2040E+04 |
| 0.2763E+01 | 0.1881E-01 | 0.2040E+04 |
| 0.2908E+01 | 0.1414E-01 | 0.2040E+04 |
| 0.3052E+01 | 0.1144E-01 | 0.2040E+04 |
| 0.3197E+01 | 0.9830E-02 | 0.2040E+04 |
| 0.3342E+01 | 0.8145E-02 | 0.2040E+04 |
| 0.3487E+01 | 0.6056E-02 | 0.2040E+04 |
| 0.3632E+01 | 0.4521E-02 | 0.2040E+04 |
| 0.3777E+01 | 0.3770E-02 | 0.2040E+04 |
| 0.3921E+01 | 0.3011E-02 | 0.2040E+04 |
| 0.4066E+01 | 0.2301E-02 | 0.2040E+04 |
| 0.4211E+01 | 0.1877E-02 | 0.2040E+04 |
| 0.4356E+01 | 0.1501E-02 | 0.2040E+04 |
| 0.4501E+01 | 0.1077E-02 | 0.2040E+04 |
| 0.4645E+01 | 0.6196E-03 | 0.2040E+04 |
| 0.4790E+01 | 0.4886E-03 | 0.2040E+04 |
| 0.4935E+01 | 0.6396E-03 | 0.2040E+04 |
| 0.5080E+01 | 0.7218E-03 | 0.2040E+04 |
| 0.5225E+01 | 0.5477E-03 | 0.2040E+04 |
| 0.5369E+01 | 0.2876E-03 | 0.2040E+04 |
| 0.5514E+01 | 0.1726E-03 | 0.2040E+04 |
| 0.5659E+01 | 0.2074E-03 | 0.2040E+04 |
| 0.5804E+01 | 0.2340E-03 | 0.2040E+04 |
| 0.5949E+01 | 0.1739E-03 | 0.2040E+04 |
| 0.6093E+01 | 0.1592E-03 | 0.2040E+04 |
| 0.6238E+01 | 0.1711E-03 | 0.2040E+04 |
| 0.6383E+01 | 0.1767E-03 | 0.2040E+04 |
| 0.6528E+01 | 0.1535E-03 | 0.2040E+04 |
| 0.6673E+01 | 0.1240E-03 | 0.2040E+04 |
| 0.6817E+01 | 0.1004E-03 | 0.2040E+04 |
| 0.6962E+01 | 0.6888E-04 | 0.2040E+04 |
| 0.7107E+01 | 0.7827E-05 | 0.2040E+04 |
| 0.7252E+01 | 0.0000E+00 | 0.2040E+04 |
| 0.7397E+01 | 0.0000E+00 | 0.2040E+04 |

V1\_Results\_baseline\_Irena.dat

|             |            |            |
|-------------|------------|------------|
| 0.7542E+01  | 0.0000E+00 | 0.2040E+04 |
| 0.7686E+01  | 0.0000E+00 | 0.2040E+04 |
| 0.7831E+01  | 0.0000E+00 | 0.2040E+04 |
| 0.7976E+01  | 0.0000E+00 | 0.2040E+04 |
| 0.8121E+01  | 0.0000E+00 | 0.2040E+04 |
| 0.8266E+01  | 0.0000E+00 | 0.2040E+04 |
| 0.8410E+01  | 0.1735E-04 | 0.2040E+04 |
| 0.8555E+01  | 0.3152E-04 | 0.2040E+04 |
|             |            |            |
| -0.2833E+01 | 0.1807E-03 | 0.2050E+04 |
| -0.2693E+01 | 0.5587E-03 | 0.2050E+04 |
| -0.2554E+01 | 0.1419E-02 | 0.2050E+04 |
| -0.2414E+01 | 0.3231E-02 | 0.2050E+04 |
| -0.2275E+01 | 0.6699E-02 | 0.2050E+04 |
| -0.2135E+01 | 0.1359E-01 | 0.2050E+04 |
| -0.1996E+01 | 0.2645E-01 | 0.2050E+04 |
| -0.1856E+01 | 0.4588E-01 | 0.2050E+04 |
| -0.1717E+01 | 0.7285E-01 | 0.2050E+04 |
| -0.1578E+01 | 0.1092E+00 | 0.2050E+04 |
| -0.1438E+01 | 0.1523E+00 | 0.2050E+04 |
| -0.1299E+01 | 0.2002E+00 | 0.2050E+04 |
| -0.1159E+01 | 0.2510E+00 | 0.2050E+04 |
| -0.1020E+01 | 0.2992E+00 | 0.2050E+04 |
| -0.8804E+00 | 0.3416E+00 | 0.2050E+04 |
| -0.7410E+00 | 0.3780E+00 | 0.2050E+04 |
| -0.6015E+00 | 0.4018E+00 | 0.2050E+04 |
| -0.4621E+00 | 0.4163E+00 | 0.2050E+04 |
| -0.3227E+00 | 0.4247E+00 | 0.2050E+04 |
| -0.1832E+00 | 0.4240E+00 | 0.2050E+04 |
| -0.4378E-01 | 0.4132E+00 | 0.2050E+04 |
| 0.9566E-01  | 0.3934E+00 | 0.2050E+04 |
| 0.2351E+00  | 0.3664E+00 | 0.2050E+04 |
| 0.3745E+00  | 0.3344E+00 | 0.2050E+04 |
| 0.5140E+00  | 0.3005E+00 | 0.2050E+04 |
| 0.6534E+00  | 0.2709E+00 | 0.2050E+04 |
| 0.7929E+00  | 0.2379E+00 | 0.2050E+04 |

V1\_Results\_baseline\_Irena.dat

|            |            |            |
|------------|------------|------------|
| 0.9323E+00 | 0.2063E+00 | 0.2050E+04 |
| 0.1072E+01 | 0.1798E+00 | 0.2050E+04 |
| 0.1211E+01 | 0.1535E+00 | 0.2050E+04 |
| 0.1351E+01 | 0.1298E+00 | 0.2050E+04 |
| 0.1490E+01 | 0.1100E+00 | 0.2050E+04 |
| 0.1629E+01 | 0.9185E-01 | 0.2050E+04 |
| 0.1769E+01 | 0.7643E-01 | 0.2050E+04 |
| 0.1908E+01 | 0.6363E-01 | 0.2050E+04 |
| 0.2048E+01 | 0.5173E-01 | 0.2050E+04 |
| 0.2187E+01 | 0.4066E-01 | 0.2050E+04 |
| 0.2327E+01 | 0.3306E-01 | 0.2050E+04 |
| 0.2466E+01 | 0.2807E-01 | 0.2050E+04 |
| 0.2606E+01 | 0.2333E-01 | 0.2050E+04 |
| 0.2745E+01 | 0.1850E-01 | 0.2050E+04 |
| 0.2884E+01 | 0.1445E-01 | 0.2050E+04 |
| 0.3024E+01 | 0.1158E-01 | 0.2050E+04 |
| 0.3163E+01 | 0.9868E-02 | 0.2050E+04 |
| 0.3303E+01 | 0.8278E-02 | 0.2050E+04 |
| 0.3442E+01 | 0.6495E-02 | 0.2050E+04 |
| 0.3582E+01 | 0.5320E-02 | 0.2050E+04 |
| 0.3721E+01 | 0.4379E-02 | 0.2050E+04 |
| 0.3861E+01 | 0.3114E-02 | 0.2050E+04 |
| 0.4000E+01 | 0.2557E-02 | 0.2050E+04 |
| 0.4139E+01 | 0.2284E-02 | 0.2050E+04 |
| 0.4279E+01 | 0.1878E-02 | 0.2050E+04 |
| 0.4418E+01 | 0.1403E-02 | 0.2050E+04 |
| 0.4558E+01 | 0.1172E-02 | 0.2050E+04 |
| 0.4697E+01 | 0.1063E-02 | 0.2050E+04 |
| 0.4837E+01 | 0.9830E-03 | 0.2050E+04 |
| 0.4976E+01 | 0.7187E-03 | 0.2050E+04 |
| 0.5115E+01 | 0.4509E-03 | 0.2050E+04 |
| 0.5255E+01 | 0.3590E-03 | 0.2050E+04 |
| 0.5394E+01 | 0.2895E-03 | 0.2050E+04 |
| 0.5534E+01 | 0.2711E-03 | 0.2050E+04 |
| 0.5673E+01 | 0.3278E-03 | 0.2050E+04 |
| 0.5813E+01 | 0.3471E-03 | 0.2050E+04 |

# V1\_Results\_baseline\_Irena.dat

|            |            |            |
|------------|------------|------------|
| 0.5952E+01 | 0.2903E-03 | 0.2050E+04 |
| 0.6092E+01 | 0.1875E-03 | 0.2050E+04 |
| 0.6231E+01 | 0.7759E-04 | 0.2050E+04 |
| 0.6370E+01 | 0.7257E-04 | 0.2050E+04 |
| 0.6510E+01 | 0.6770E-04 | 0.2050E+04 |
| 0.6649E+01 | 0.3764E-04 | 0.2050E+04 |
| 0.6789E+01 | 0.0000E+00 | 0.2050E+04 |
| 0.6928E+01 | 0.1271E-04 | 0.2050E+04 |
| 0.7068E+01 | 0.4268E-04 | 0.2050E+04 |
| 0.7207E+01 | 0.1172E-03 | 0.2050E+04 |
| 0.7346E+01 | 0.1489E-03 | 0.2050E+04 |
| 0.7486E+01 | 0.1175E-03 | 0.2050E+04 |
| 0.7625E+01 | 0.4858E-04 | 0.2050E+04 |
| 0.7765E+01 | 0.4871E-04 | 0.2050E+04 |
| 0.7904E+01 | 0.2947E-04 | 0.2050E+04 |
| 0.8044E+01 | 0.8773E-05 | 0.2050E+04 |
| 0.8183E+01 | 0.1839E-04 | 0.2050E+04 |
| 0.8323E+01 | 0.3153E-04 | 0.2050E+04 |

```

#*****
#*****      AVOIDED CARBON VALUES ($ tr.)      *****
#*****
# Valued at:   1 US$,   Social Carbon Cost,   Tax IEA,   Tax S.S.
              0.2824E+00   0.3790E+01   0.3634E+02   0.2064E+02

```

```

#*****
#*****      CAPOPEX (all; tr. US$): SUMMARY STATISTICS      *****
#*****

```

MEAN, VARIANCE, SKW, KURT & MAX. VALUES 50%, 80%, 90%, 95%

|           |           |           |           |           |           |           |           |
|-----------|-----------|-----------|-----------|-----------|-----------|-----------|-----------|
| 0.189E+02 | 0.541E+01 | 0.542E+00 | 0.359E+01 | 0.186E+02 | 0.207E+02 | 0.219E+02 | 0.230E+02 |
|-----------|-----------|-----------|-----------|-----------|-----------|-----------|-----------|

CapOpStrEx EXPECT. / ( CapOpStrEx > CapOpStrEx max. al 80%, 90%, 95%)

# Vl\_Results\_baseline\_Irena.dat

0.2224E+02 0.2362E+02 0.2408E+02

\*\*\*\*\*  
 #\*\*\*\*\* CAPITAL COSTS - AVOIDED CARBON VALUES (US\$ tr.) \*\*\*\*\*  
 #\*\*\*\*\*

# Valued at: 1 US\$, Social Carbon Cost, Tax IEA, Tax S.S.  
 0.1857E+02 0.1507E+02 -0.1748E+02 -0.1782E+01

\*\*\*\*\*  
 #\*\*\*\*\* CAPITAL PRICES (USD/1W) \*\*\*\*\*  
 #\*\*\*\*\*

# MEANS, VARIANCES & MAX. VALUES 50%, 80%, 90%, 95%  
 # ALL YEARS: 2015-2050

|      |           |           |           |           |           |           |
|------|-----------|-----------|-----------|-----------|-----------|-----------|
| 2015 | 0.130E+01 | 0.680E-01 | 0.127E+01 | 0.149E+01 | 0.164E+01 | 0.177E+01 |
| 2016 | 0.114E+01 | 0.552E-01 | 0.111E+01 | 0.132E+01 | 0.145E+01 | 0.156E+01 |
| 2017 | 0.107E+01 | 0.486E-01 | 0.104E+01 | 0.123E+01 | 0.136E+01 | 0.146E+01 |
| 2018 | 0.101E+01 | 0.438E-01 | 0.988E+00 | 0.117E+01 | 0.129E+01 | 0.138E+01 |
| 2019 | 0.972E+00 | 0.405E-01 | 0.946E+00 | 0.112E+01 | 0.123E+01 | 0.133E+01 |
| 2020 | 0.937E+00 | 0.381E-01 | 0.913E+00 | 0.108E+01 | 0.119E+01 | 0.129E+01 |
| 2021 | 0.909E+00 | 0.364E-01 | 0.884E+00 | 0.105E+01 | 0.115E+01 | 0.125E+01 |
| 2022 | 0.883E+00 | 0.342E-01 | 0.862E+00 | 0.102E+01 | 0.112E+01 | 0.121E+01 |
| 2023 | 0.862E+00 | 0.331E-01 | 0.839E+00 | 0.999E+00 | 0.110E+01 | 0.119E+01 |
| 2024 | 0.842E+00 | 0.318E-01 | 0.818E+00 | 0.975E+00 | 0.107E+01 | 0.116E+01 |
| 2025 | 0.825E+00 | 0.305E-01 | 0.806E+00 | 0.958E+00 | 0.105E+01 | 0.114E+01 |
| 2026 | 0.810E+00 | 0.298E-01 | 0.787E+00 | 0.940E+00 | 0.103E+01 | 0.112E+01 |
| 2027 | 0.794E+00 | 0.287E-01 | 0.773E+00 | 0.923E+00 | 0.101E+01 | 0.110E+01 |
| 2028 | 0.786E+00 | 0.280E-01 | 0.766E+00 | 0.910E+00 | 0.100E+01 | 0.108E+01 |
| 2029 | 0.772E+00 | 0.274E-01 | 0.750E+00 | 0.898E+00 | 0.987E+00 | 0.107E+01 |
| 2030 | 0.761E+00 | 0.262E-01 | 0.738E+00 | 0.882E+00 | 0.972E+00 | 0.105E+01 |
| 2031 | 0.751E+00 | 0.259E-01 | 0.732E+00 | 0.874E+00 | 0.959E+00 | 0.104E+01 |

V1\_Results\_baseline\_Irena.dat

|      |           |           |           |           |           |           |
|------|-----------|-----------|-----------|-----------|-----------|-----------|
| 2032 | 0.742E+00 | 0.254E-01 | 0.723E+00 | 0.864E+00 | 0.946E+00 | 0.103E+01 |
| 2033 | 0.738E+00 | 0.250E-01 | 0.720E+00 | 0.857E+00 | 0.941E+00 | 0.102E+01 |
| 2034 | 0.733E+00 | 0.245E-01 | 0.713E+00 | 0.850E+00 | 0.936E+00 | 0.101E+01 |
| 2035 | 0.731E+00 | 0.243E-01 | 0.712E+00 | 0.847E+00 | 0.931E+00 | 0.101E+01 |
| 2036 | 0.737E+00 | 0.243E-01 | 0.718E+00 | 0.858E+00 | 0.939E+00 | 0.101E+01 |
| 2037 | 0.720E+00 | 0.238E-01 | 0.702E+00 | 0.837E+00 | 0.920E+00 | 0.994E+00 |
| 2038 | 0.722E+00 | 0.236E-01 | 0.703E+00 | 0.838E+00 | 0.922E+00 | 0.996E+00 |
| 2039 | 0.720E+00 | 0.234E-01 | 0.702E+00 | 0.836E+00 | 0.916E+00 | 0.994E+00 |
| 2040 | 0.681E+00 | 0.220E-01 | 0.662E+00 | 0.792E+00 | 0.871E+00 | 0.946E+00 |
| 2041 | 0.691E+00 | 0.222E-01 | 0.675E+00 | 0.805E+00 | 0.881E+00 | 0.958E+00 |
| 2042 | 0.718E+00 | 0.231E-01 | 0.701E+00 | 0.836E+00 | 0.914E+00 | 0.989E+00 |
| 2043 | 0.794E+00 | 0.269E-01 | 0.777E+00 | 0.920E+00 | 0.101E+01 | 0.108E+01 |
| 2044 | 0.785E+00 | 0.263E-01 | 0.765E+00 | 0.912E+00 | 0.997E+00 | 0.107E+01 |
| 2045 | 0.741E+00 | 0.238E-01 | 0.723E+00 | 0.860E+00 | 0.942E+00 | 0.102E+01 |
| 2046 | 0.653E+00 | 0.205E-01 | 0.632E+00 | 0.759E+00 | 0.835E+00 | 0.906E+00 |
| 2047 | 0.646E+00 | 0.202E-01 | 0.626E+00 | 0.753E+00 | 0.829E+00 | 0.901E+00 |
| 2048 | 0.639E+00 | 0.200E-01 | 0.621E+00 | 0.744E+00 | 0.821E+00 | 0.891E+00 |
| 2049 | 0.633E+00 | 0.198E-01 | 0.614E+00 | 0.737E+00 | 0.814E+00 | 0.883E+00 |
| 2050 | 0.626E+00 | 0.194E-01 | 0.608E+00 | 0.729E+00 | 0.805E+00 | 0.874E+00 |

#####  
#\*\*\*\*\* TOTAL COSTS USD/W: TIMELINE BREAKDOWN \*\*\*\*\*  
#\*\*\*\*\*

| #    | PV cap.(Mod+inv) | PV BoS   | PV Str   | W cap.   | W BoS    | W Str    |      |
|------|------------------|----------|----------|----------|----------|----------|------|
| 2015 | 0.383292         | 0.276980 | 0.121379 | 0.642182 | 0.275221 | 0.128538 | 2015 |
| 2016 | 0.342698         | 0.292011 | 0.125399 | 0.561017 | 0.240436 | 0.114827 |      |
| 2017 | 0.307779         | 0.288078 | 0.121228 | 0.532496 | 0.228213 | 0.109682 |      |
| 2018 | 0.284812         | 0.284227 | 0.117208 | 0.510202 | 0.218658 | 0.104747 |      |
| 2019 | 0.268545         | 0.280395 | 0.113308 | 0.492084 | 0.210893 | 0.100040 |      |
| 2020 | 0.256101         | 0.276599 | 0.109531 | 0.476740 | 0.204317 | 0.095543 | 2020 |
| 2021 | 0.246399         | 0.272969 | 0.105925 | 0.463486 | 0.198637 | 0.091196 |      |
| 2022 | 0.237135         | 0.268782 | 0.102208 | 0.452349 | 0.193864 | 0.087269 |      |
| 2023 | 0.230568         | 0.265277 | 0.098851 | 0.441719 | 0.189308 | 0.083278 |      |
| 2024 | 0.225048         | 0.261718 | 0.095568 | 0.431855 | 0.185081 | 0.079498 |      |

| Vl_Results_baseline_Irena.dat |          |          |          |          |          |               |
|-------------------------------|----------|----------|----------|----------|----------|---------------|
| 2025                          | 0.218942 | 0.257486 | 0.092136 | 0.424386 | 0.181880 | 0.076140 2025 |
| 2026                          | 0.214576 | 0.253658 | 0.088946 | 0.416790 | 0.178624 | 0.072805      |
| 2027                          | 0.210528 | 0.250400 | 0.086041 | 0.408622 | 0.175124 | 0.069437      |
| 2028                          | 0.204905 | 0.244478 | 0.082321 | 0.406677 | 0.174290 | 0.067128      |
| 2029                          | 0.202328 | 0.241626 | 0.079729 | 0.399073 | 0.171031 | 0.063925      |
| 2030                          | 0.198707 | 0.237889 | 0.076920 | 0.393410 | 0.168604 | 0.061162 2030 |
| 2031                          | 0.195866 | 0.234014 | 0.074149 | 0.388356 | 0.166438 | 0.058578      |
| 2032                          | 0.193035 | 0.229940 | 0.071397 | 0.384416 | 0.164750 | 0.056184      |
| 2033                          | 0.189097 | 0.224298 | 0.068248 | 0.384345 | 0.164719 | 0.054385      |
| 2034                          | 0.184974 | 0.219082 | 0.065323 | 0.383408 | 0.164318 | 0.052554      |
| 2035                          | 0.181109 | 0.213082 | 0.062259 | 0.384672 | 0.164859 | 0.051047 2035 |
| 2036                          | 0.174211 | 0.203839 | 0.058364 | 0.393774 | 0.168760 | 0.050548      |
| 2037                          | 0.175785 | 0.204480 | 0.057373 | 0.381175 | 0.163361 | 0.047316      |
| 2038                          | 0.171008 | 0.197774 | 0.054378 | 0.385683 | 0.165293 | 0.046251      |
| 2039                          | 0.167177 | 0.192395 | 0.051838 | 0.387087 | 0.165895 | 0.044889      |
| 2040                          | 0.177704 | 0.202666 | 0.053509 | 0.352120 | 0.150908 | 0.039466 2040 |
| 2041                          | 0.170451 | 0.193018 | 0.049939 | 0.364385 | 0.156165 | 0.039430      |
| 2042                          | 0.157894 | 0.177107 | 0.044903 | 0.392315 | 0.168135 | 0.041000      |
| 2043                          | 0.129019 | 0.143361 | 0.035618 | 0.465321 | 0.199423 | 0.046954      |
| 2044                          | 0.129109 | 0.142289 | 0.034643 | 0.459204 | 0.196802 | 0.044727      |
| 2045                          | 0.141650 | 0.154575 | 0.036879 | 0.419249 | 0.179678 | 0.039413 2045 |
| 2046                          | 0.169016 | 0.182284 | 0.042617 | 0.338542 | 0.145090 | 0.030716      |
| 2047                          | 0.168504 | 0.180032 | 0.041246 | 0.334069 | 0.143172 | 0.029243      |
| 2048                          | 0.168324 | 0.177861 | 0.039931 | 0.329615 | 0.141264 | 0.027825      |
| 2049                          | 0.168067 | 0.175500 | 0.038611 | 0.325703 | 0.139587 | 0.026518      |
| 2050                          | 0.167776 | 0.173409 | 0.037385 | 0.320873 | 0.137517 | 0.025218 2050 |
