# Supplementary material
Source: MDPI journal article supplement (https://www.mdpi.com/1996-1073/12/15/2875)
Supplement: s1 [file s1 › supplementary material/Programs and data/V2_Results_baseline_Irena_accel.pdf]

# V2\_Results\_baseline\_Irena\_accel.dat

# \*\*\* CASO: 1, IEA ; 2, Irena : 2

# \*\*\* Roadmap (1,acelerado; 2,retrasado) : 1

#n° de simulaciones = 100000

# \*\*\*\*\* Parámetros Wind \*\*\*\*\*

#medias ec. precio Turbinas : 2.9666 -0.1860  
 #dev. est. parámetros ec. precio Turbinas : 0.0000 0.0130  
 #dev. est. ec. precio Turbinas : 0.0900  
 #valor inicial en 2014 de Cap 340.6110  
 #depreciación, Performance Ratio, kgCO2 0.984 1.000 0.780  
 #Life Span de los Turbinas 27  
 #Social Discount Rate 0.022500 0.019286  
 #WACC, Loan Maturity 0.050 15  
 #Generación aleatoria de los parámetros = T  
 #Generación aleatoria de los errs. de las ecs. = T  
 #Storage costs tenido en cuenta = T  
 #Modelo Precio Turbinas (1, old; 2, simple; 3, LR dec.; 4, LR +dec. 2

# \*\*\*\*\* Parámetros PV \*\*\*\*\*

#medias ec. precio módulos : 3.6025 -0.3200  
 #dev. est. parámetros ec. precio módulos : 0.1710 0.0240  
 #dev. est. ec. precio módulos : 0.3300  
 #valores iniciales en 2014 de Cap, Pe, Pm, Ps, upm : 157.7609 0.8229 0.7050  
 0.0760 0.0000  
 #depreciación, Performance Ratio, kgCO2 : 0.990 0.850 0.780  
 #Life Span de los módulos : 30  
 #Social Discount Rate : 0.022500 0.019286  
 #WACC, Loan Maturity : 0.090 7  
 #Generación aleatoria de los parámetros = T  
 #Generación aleatoria de los errs. de las ecs. = T  
 #Storage costs tenido en cuenta = T

#Modelo Precio módulos (1, old; 2, simple; 3, LR dec.; 4, LR +dec. : 2

\*\*\*\*\*  
 \*\*\*\*\* ENERGY GENERATED \*\*\*\*\*  
 \*\*\*\*\*

Total, PV, Wind: 0.45794E+12 0.22183E+12 0.23612E+12  
 PV(%), Wind(%): 0.484401 0.515599

#\*\*\*\*\*  
 #\*\*\*\*\* ANNUAL LCE (means; US \$ per Mwh.) \*\*\*\*\*  
 #\*\*\*\*\*  
 #

|      | Total       | PV          | Wind        |
|------|-------------|-------------|-------------|
| 2015 | 0.83597E+02 | 0.84012E+02 | 0.83304E+02 |
| 2016 | 0.72601E+02 | 0.69818E+02 | 0.75519E+02 |
| 2017 | 0.67082E+02 | 0.63638E+02 | 0.70710E+02 |
| 2018 | 0.63267E+02 | 0.59513E+02 | 0.67240E+02 |
| 2019 | 0.60323E+02 | 0.56377E+02 | 0.64519E+02 |
| 2020 | 0.57895E+02 | 0.53798E+02 | 0.62266E+02 |
| 2021 | 0.55875E+02 | 0.51599E+02 | 0.60454E+02 |
| 2022 | 0.54015E+02 | 0.49609E+02 | 0.58738E+02 |
| 2023 | 0.52432E+02 | 0.47886E+02 | 0.57319E+02 |
| 2024 | 0.50996E+02 | 0.46341E+02 | 0.56012E+02 |
| 2025 | 0.49680E+02 | 0.44880E+02 | 0.54846E+02 |
| 2026 | 0.48521E+02 | 0.43595E+02 | 0.53822E+02 |
| 2027 | 0.47430E+02 | 0.42374E+02 | 0.52879E+02 |
| 2028 | 0.46473E+02 | 0.41279E+02 | 0.52011E+02 |
| 2029 | 0.45625E+02 | 0.40272E+02 | 0.51344E+02 |
| 2030 | 0.44763E+02 | 0.39383E+02 | 0.50496E+02 |
| 2031 | 0.69926E+02 | 0.34222E+03 | 0.61487E+02 |
| 2032 | 0.68004E+02 | 0.26215E+03 | 0.60756E+02 |
| 2033 | 0.59914E+02 | 0.24081E+03 | 0.53347E+02 |
| 2034 | 0.59180E+02 | 0.16461E+03 | 0.54442E+02 |

V2\_Results\_baseline\_Irena\_accel.dat

|      |             |             |             |
|------|-------------|-------------|-------------|
| 2035 | 0.63970E+02 | 0.23296E+03 | 0.55996E+02 |
| 2036 | 0.10237E+03 | 0.80215E+03 | 0.70387E+02 |
| 2037 | 0.10524E+03 | 0.50456E+03 | 0.72653E+02 |
| 2038 | 0.88170E+02 | 0.28723E+03 | 0.65864E+02 |
| 2039 | 0.78833E+02 | 0.20120E+03 | 0.62080E+02 |
| 2040 | 0.79279E+02 | 0.10472E+03 | 0.68203E+02 |
| 2041 | 0.66187E+02 | 0.82604E+02 | 0.59881E+02 |
| 2042 | 0.58601E+02 | 0.75274E+02 | 0.54145E+02 |
| 2043 | 0.48960E+02 | 0.63824E+02 | 0.47643E+02 |
| 2044 | 0.48571E+02 | 0.61092E+02 | 0.47430E+02 |
| 2045 | 0.48015E+02 | 0.44031E+02 | 0.48787E+02 |
| 2046 | 0.39748E+02 | 0.31538E+02 | 0.48726E+02 |
| 2047 | 0.39527E+02 | 0.31163E+02 | 0.48670E+02 |
| 2048 | 0.39334E+02 | 0.30821E+02 | 0.48638E+02 |
| 2049 | 0.39167E+02 | 0.30494E+02 | 0.48621E+02 |
| 2050 | 0.38939E+02 | 0.30188E+02 | 0.48478E+02 |

#####  
 #\*\*\*\*\* TOTAL, PV & WIND, LCE (US\$/MWh): SUMMARY STATISTICS \*\*\*\*\*  
 #\*\*\*\*\*

\*\*\*\*\* Wind \*\*\*\*\*

MEAN, VARIANCE, SKW, KURT & MAX. VALUES 50%, 80%, 90%, 95%

0.575E+02 0.105E+03 0.598E+00 0.368E+01 0.564E+02 0.655E+02 0.709E+02 0.757E+02

LCE EXPECT. / ( LCE > LCE max. at 80%, 90%, 95%)

0.7308E+02 0.7780E+02 0.8204E+02

\*\*\*\*\* PV \*\*\*\*\*

# V2\_Results\_baseline\_Irena\_accel.dat

MEAN, VARIANCE, SKW, KURT & MAX. VALUES 50%, 80%, 90%, 95%

0.486E+02 0.501E+02 0.128E+01 0.600E+01 0.471E+02 0.534E+02 0.577E+02 0.619E+02

LCE EXPECT. / ( LCE > LCE max. al 80%, 90%, 95%)

0.6000E+02 0.6323E+02 0.6741E+02

\*\*\*\*\* Total \*\*\*\*\*

MEAN, VARIANCE, SKW, KURT & MAX. VALUES 50%, 80%, 90%, 95%

0.532E+02 0.397E+02 0.552E+00 0.361E+01 0.526E+02 0.581E+02 0.613E+02 0.643E+02

LCE EXPECT. / ( LCE > LCE max. al 80%, 90%, 95%)

0.6312E+02 0.6615E+02 0.6787E+02

#\*\*\*\*\*  
#\*\*\*\*\* TOTAL LCE (US\$/MWh): SUMMARY STATISTICS; ALL YEARS: 2015 - 2050 \*\*\*\*\*  
#\*\*\*\*\*

# MEAN, VARIANCE, SKW, KURT, INT: 2.5%, 50%, 80%, 90%, 95%, 97.5%

|   |           |           |           |           |           |           |           |           |
|---|-----------|-----------|-----------|-----------|-----------|-----------|-----------|-----------|
| 1 | 0.836E+02 | 0.142E+03 | 0.739E+00 | 0.427E+01 | 0.637E+02 | 0.823E+02 | 0.928E+02 | 0.991E+02 |
|   | 0.105E+03 | 0.110E+03 |           |           |           |           |           |           |
| 2 | 0.726E+02 | 0.102E+03 | 0.860E+00 | 0.474E+01 | 0.564E+02 | 0.713E+02 | 0.802E+02 | 0.855E+02 |
|   | 0.906E+02 | 0.956E+02 |           |           |           |           |           |           |
| 3 | 0.671E+02 | 0.843E+02 | 0.832E+00 | 0.463E+01 | 0.521E+02 | 0.659E+02 | 0.739E+02 | 0.790E+02 |
|   | 0.835E+02 | 0.879E+02 |           |           |           |           |           |           |
| 4 | 0.633E+02 | 0.732E+02 | 0.798E+00 | 0.450E+01 | 0.492E+02 | 0.623E+02 | 0.698E+02 | 0.743E+02 |

V2\_Results\_baseline\_Irena\_accel.dat

|           |           |           |           |           |           |           |           |           |  |
|-----------|-----------|-----------|-----------|-----------|-----------|-----------|-----------|-----------|--|
| 0.785E+02 | 0.826E+02 |           |           |           |           |           |           |           |  |
| 5         | 0.603E+02 | 0.661E+02 | 0.818E+00 | 0.467E+01 | 0.470E+02 | 0.594E+02 | 0.665E+02 | 0.708E+02 |  |
| 0.748E+02 | 0.785E+02 |           |           |           |           |           |           |           |  |
| 6         | 0.579E+02 | 0.610E+02 | 0.783E+00 | 0.441E+01 | 0.451E+02 | 0.570E+02 | 0.638E+02 | 0.680E+02 |  |
| 0.719E+02 | 0.755E+02 |           |           |           |           |           |           |           |  |
| 7         | 0.559E+02 | 0.573E+02 | 0.801E+00 | 0.451E+01 | 0.435E+02 | 0.550E+02 | 0.616E+02 | 0.656E+02 |  |
| 0.694E+02 | 0.730E+02 |           |           |           |           |           |           |           |  |
| 8         | 0.540E+02 | 0.531E+02 | 0.786E+00 | 0.437E+01 | 0.421E+02 | 0.531E+02 | 0.596E+02 | 0.634E+02 |  |
| 0.669E+02 | 0.705E+02 |           |           |           |           |           |           |           |  |
| 9         | 0.524E+02 | 0.508E+02 | 0.794E+00 | 0.451E+01 | 0.407E+02 | 0.516E+02 | 0.578E+02 | 0.616E+02 |  |
| 0.651E+02 | 0.685E+02 |           |           |           |           |           |           |           |  |
| 10        | 0.510E+02 | 0.484E+02 | 0.797E+00 | 0.451E+01 | 0.396E+02 | 0.501E+02 | 0.562E+02 | 0.600E+02 |  |
| 0.634E+02 | 0.669E+02 |           |           |           |           |           |           |           |  |
| 11        | 0.497E+02 | 0.460E+02 | 0.751E+00 | 0.427E+01 | 0.386E+02 | 0.488E+02 | 0.548E+02 | 0.584E+02 |  |
| 0.617E+02 | 0.649E+02 |           |           |           |           |           |           |           |  |
| 12        | 0.485E+02 | 0.447E+02 | 0.766E+00 | 0.426E+01 | 0.376E+02 | 0.477E+02 | 0.536E+02 | 0.572E+02 |  |
| 0.605E+02 | 0.637E+02 |           |           |           |           |           |           |           |  |
| 13        | 0.474E+02 | 0.428E+02 | 0.747E+00 | 0.418E+01 | 0.367E+02 | 0.467E+02 | 0.524E+02 | 0.560E+02 |  |
| 0.591E+02 | 0.621E+02 |           |           |           |           |           |           |           |  |
| 14        | 0.465E+02 | 0.416E+02 | 0.741E+00 | 0.418E+01 | 0.358E+02 | 0.457E+02 | 0.514E+02 | 0.548E+02 |  |
| 0.579E+02 | 0.610E+02 |           |           |           |           |           |           |           |  |
| 15        | 0.456E+02 | 0.407E+02 | 0.758E+00 | 0.423E+01 | 0.352E+02 | 0.448E+02 | 0.505E+02 | 0.539E+02 |  |
| 0.569E+02 | 0.599E+02 |           |           |           |           |           |           |           |  |
| 16        | 0.448E+02 | 0.389E+02 | 0.726E+00 | 0.414E+01 | 0.344E+02 | 0.440E+02 | 0.495E+02 | 0.528E+02 |  |
| 0.559E+02 | 0.586E+02 |           |           |           |           |           |           |           |  |
| 17        | 0.699E+02 | 0.101E+03 | 0.676E+00 | 0.384E+01 | 0.533E+02 | 0.688E+02 | 0.777E+02 | 0.831E+02 |  |
| 0.879E+02 | 0.922E+02 |           |           |           |           |           |           |           |  |
| 18        | 0.680E+02 | 0.999E+02 | 0.673E+00 | 0.379E+01 | 0.514E+02 | 0.669E+02 | 0.757E+02 | 0.811E+02 |  |
| 0.859E+02 | 0.905E+02 |           |           |           |           |           |           |           |  |
| 19        | 0.599E+02 | 0.991E+02 | 0.668E+00 | 0.385E+01 | 0.434E+02 | 0.588E+02 | 0.677E+02 | 0.729E+02 |  |
| 0.777E+02 | 0.821E+02 |           |           |           |           |           |           |           |  |
| 20        | 0.592E+02 | 0.975E+02 | 0.666E+00 | 0.378E+01 | 0.428E+02 | 0.579E+02 | 0.668E+02 | 0.721E+02 |  |
| 0.769E+02 | 0.814E+02 |           |           |           |           |           |           |           |  |
| 21        | 0.640E+02 | 0.964E+02 | 0.676E+00 | 0.387E+01 | 0.477E+02 | 0.628E+02 | 0.717E+02 | 0.768E+02 |  |
| 0.814E+02 | 0.861E+02 |           |           |           |           |           |           |           |  |
| 22        | 0.102E+03 | 0.962E+02 | 0.664E+00 | 0.379E+01 | 0.861E+02 | 0.101E+03 | 0.110E+03 | 0.115E+03 |  |

# V2\_Results\_baseline\_Irena\_accel.dat

|           |           |           |           |           |           |           |           |           |  |
|-----------|-----------|-----------|-----------|-----------|-----------|-----------|-----------|-----------|--|
| 0.120E+03 | 0.124E+03 |           |           |           |           |           |           |           |  |
| 23        | 0.105E+03 | 0.902E+02 | 0.683E+00 | 0.393E+01 | 0.895E+02 | 0.104E+03 | 0.113E+03 | 0.118E+03 |  |
| 0.122E+03 | 0.126E+03 |           |           |           |           |           |           |           |  |
| 24        | 0.882E+02 | 0.855E+02 | 0.658E+00 | 0.380E+01 | 0.727E+02 | 0.872E+02 | 0.953E+02 | 0.100E+03 |  |
| 0.105E+03 | 0.109E+03 |           |           |           |           |           |           |           |  |
| 25        | 0.788E+02 | 0.816E+02 | 0.689E+00 | 0.397E+01 | 0.639E+02 | 0.778E+02 | 0.859E+02 | 0.906E+02 |  |
| 0.949E+02 | 0.990E+02 |           |           |           |           |           |           |           |  |
| 26        | 0.793E+02 | 0.551E+02 | 0.636E+00 | 0.375E+01 | 0.669E+02 | 0.784E+02 | 0.851E+02 | 0.891E+02 |  |
| 0.925E+02 | 0.957E+02 |           |           |           |           |           |           |           |  |
| 27        | 0.662E+02 | 0.578E+02 | 0.638E+00 | 0.378E+01 | 0.534E+02 | 0.654E+02 | 0.722E+02 | 0.762E+02 |  |
| 0.797E+02 | 0.831E+02 |           |           |           |           |           |           |           |  |
| 28        | 0.586E+02 | 0.665E+02 | 0.647E+00 | 0.375E+01 | 0.450E+02 | 0.577E+02 | 0.649E+02 | 0.693E+02 |  |
| 0.732E+02 | 0.768E+02 |           |           |           |           |           |           |           |  |
| 29        | 0.490E+02 | 0.871E+02 | 0.697E+00 | 0.395E+01 | 0.334E+02 | 0.477E+02 | 0.560E+02 | 0.612E+02 |  |
| 0.656E+02 | 0.699E+02 |           |           |           |           |           |           |           |  |
| 30        | 0.486E+02 | 0.860E+02 | 0.688E+00 | 0.388E+01 | 0.333E+02 | 0.474E+02 | 0.557E+02 | 0.607E+02 |  |
| 0.652E+02 | 0.693E+02 |           |           |           |           |           |           |           |  |
| 31        | 0.480E+02 | 0.772E+02 | 0.666E+00 | 0.385E+01 | 0.335E+02 | 0.469E+02 | 0.549E+02 | 0.594E+02 |  |
| 0.638E+02 | 0.677E+02 |           |           |           |           |           |           |           |  |
| 32        | 0.397E+02 | 0.390E+02 | 0.769E+00 | 0.452E+01 | 0.295E+02 | 0.391E+02 | 0.445E+02 | 0.478E+02 |  |
| 0.509E+02 | 0.537E+02 |           |           |           |           |           |           |           |  |
| 33        | 0.395E+02 | 0.390E+02 | 0.758E+00 | 0.428E+01 | 0.293E+02 | 0.387E+02 | 0.442E+02 | 0.477E+02 |  |
| 0.507E+02 | 0.536E+02 |           |           |           |           |           |           |           |  |
| 34        | 0.393E+02 | 0.391E+02 | 0.762E+00 | 0.431E+01 | 0.290E+02 | 0.386E+02 | 0.441E+02 | 0.475E+02 |  |
| 0.506E+02 | 0.533E+02 |           |           |           |           |           |           |           |  |
| 35        | 0.392E+02 | 0.393E+02 | 0.763E+00 | 0.434E+01 | 0.289E+02 | 0.384E+02 | 0.440E+02 | 0.473E+02 |  |
| 0.504E+02 | 0.533E+02 |           |           |           |           |           |           |           |  |
| 36        | 0.389E+02 | 0.390E+02 | 0.755E+00 | 0.429E+01 | 0.287E+02 | 0.382E+02 | 0.436E+02 | 0.470E+02 |  |
| 0.500E+02 | 0.530E+02 |           |           |           |           |           |           |           |  |

```

#*****
# p.d.f. & C.d.f LCE (US$/MWh): TOTAL, PV, WIND (Smoothed, NOT standardised)
#*****
#
#           Total           PV           Wind

```

V2\_Results\_baseline\_Irena\_accel.dat

```
# ***** NOT standardised *****

-200 0.3223E+02 0.5007E-05 0.8040E-06 0.1373E+00 0.8884E-05 0.2440E-05 0.2654E+02
0.6770E-05 0.1680E-05
-195 0.3303E+02 0.1173E-04 0.7370E-05 0.1510E+01 0.1690E-05 0.1003E-04 0.2778E+02
0.1842E-04 0.1790E-04
-190 0.3384E+02 0.3389E-04 0.2719E-04 0.2884E+01 0.0000E+00 0.1003E-04 0.2902E+02
0.5242E-04 0.6222E-04
-185 0.3464E+02 0.5526E-04 0.6493E-04 0.4257E+01 0.0000E+00 0.1003E-04 0.3026E+02
0.1341E-03 0.1817E-03
-180 0.3544E+02 0.1039E-03 0.1291E-03 0.5630E+01 0.0000E+00 0.1003E-04 0.3150E+02
0.3066E-03 0.4693E-03
-175 0.3624E+02 0.2355E-03 0.2683E-03 0.7003E+01 0.0000E+00 0.1003E-04 0.3274E+02
0.5864E-03 0.1047E-02
-170 0.3705E+02 0.5051E-03 0.5819E-03 0.8376E+01 0.0000E+00 0.1003E-04 0.3399E+02
0.9959E-03 0.2057E-02
-165 0.3785E+02 0.9434E-03 0.1180E-02 0.9749E+01 0.0000E+00 0.1003E-04 0.3523E+02
0.1695E-02 0.3788E-02
-160 0.3865E+02 0.1689E-02 0.2282E-02 0.1112E+02 0.0000E+00 0.1003E-04 0.3647E+02
0.2753E-02 0.6630E-02
-155 0.3946E+02 0.2910E-02 0.4187E-02 0.1250E+02 0.0000E+00 0.1003E-04 0.3771E+02
0.4221E-02 0.1111E-01
-150 0.4026E+02 0.4753E-02 0.7375E-02 0.1387E+02 0.0000E+00 0.1003E-04 0.3895E+02
0.6071E-02 0.1768E-01
-145 0.4106E+02 0.7355E-02 0.1238E-01 0.1524E+02 0.0000E+00 0.1003E-04 0.4019E+02
0.8397E-02 0.2690E-01
-140 0.4186E+02 0.1087E-01 0.1993E-01 0.1661E+02 0.0000E+00 0.1003E-04 0.4143E+02
0.1122E-01 0.3936E-01
-135 0.4267E+02 0.1497E-01 0.3060E-01 0.1799E+02 0.0000E+00 0.1003E-04 0.4267E+02
0.1454E-01 0.5571E-01
-130 0.4347E+02 0.1989E-01 0.4493E-01 0.1936E+02 0.0000E+00 0.1003E-04 0.4391E+02
0.1844E-01 0.7659E-01
-125 0.4427E+02 0.2570E-01 0.6367E-01 0.2073E+02 0.0000E+00 0.1003E-04 0.4515E+02
0.2260E-01 0.1026E+00
-120 0.4508E+02 0.3209E-01 0.8732E-01 0.2211E+02 0.0000E+00 0.1003E-04 0.4639E+02
0.2673E-01 0.1337E+00
```

V2\_Results\_baseline\_Irena\_accel.dat

|            |            |            |            |            |            |            |            |
|------------|------------|------------|------------|------------|------------|------------|------------|
| -115       | 0.4588E+02 | 0.3852E-01 | 0.1162E+00 | 0.2348E+02 | 0.0000E+00 | 0.1003E-04 | 0.4764E+02 |
| 0.3029E-01 | 0.1696E+00 |            |            |            |            |            |            |
| -110       | 0.4668E+02 | 0.4487E-01 | 0.1502E+00 | 0.2485E+02 | 0.0000E+00 | 0.1003E-04 | 0.4888E+02 |
| 0.3329E-01 | 0.2095E+00 |            |            |            |            |            |            |
| -105       | 0.4748E+02 | 0.5071E-01 | 0.1891E+00 | 0.2623E+02 | 0.0000E+00 | 0.1003E-04 | 0.5012E+02 |
| 0.3571E-01 | 0.2526E+00 |            |            |            |            |            |            |
| -100       | 0.4829E+02 | 0.5582E-01 | 0.2323E+00 | 0.2760E+02 | 0.0000E+00 | 0.1003E-04 | 0.5136E+02 |
| 0.3767E-01 | 0.2985E+00 |            |            |            |            |            |            |
| -95        | 0.4909E+02 | 0.5964E-01 | 0.2790E+00 | 0.2897E+02 | 0.0000E+00 | 0.1003E-04 | 0.5260E+02 |
| 0.3906E-01 | 0.3463E+00 |            |            |            |            |            |            |
| -90        | 0.4989E+02 | 0.6247E-01 | 0.3284E+00 | 0.3035E+02 | 0.0000E+00 | 0.1003E-04 | 0.5384E+02 |
| 0.4024E-01 | 0.3957E+00 |            |            |            |            |            |            |
| -85        | 0.5070E+02 | 0.6430E-01 | 0.3794E+00 | 0.3172E+02 | 0.0000E+00 | 0.1003E-04 | 0.5508E+02 |
| 0.4057E-01 | 0.4460E+00 |            |            |            |            |            |            |
| -80        | 0.5150E+02 | 0.6489E-01 | 0.4314E+00 | 0.3309E+02 | 0.3301E-05 | 0.1100E-04 | 0.5632E+02 |
| 0.4022E-01 | 0.4961E+00 |            |            |            |            |            |            |
| -75        | 0.5230E+02 | 0.6466E-01 | 0.4835E+00 | 0.3447E+02 | 0.2514E-03 | 0.1657E-03 | 0.5756E+02 |
| 0.3892E-01 | 0.5452E+00 |            |            |            |            |            |            |
| -70        | 0.5310E+02 | 0.6332E-01 | 0.5348E+00 | 0.3584E+02 | 0.1983E-02 | 0.1620E-02 | 0.5880E+02 |
| 0.3718E-01 | 0.5922E+00 |            |            |            |            |            |            |
| -65        | 0.5391E+02 | 0.6065E-01 | 0.5844E+00 | 0.3721E+02 | 0.8012E-02 | 0.8711E-02 | 0.6004E+02 |
| 0.3506E-01 | 0.6367E+00 |            |            |            |            |            |            |
| -60        | 0.5471E+02 | 0.5731E-01 | 0.6315E+00 | 0.3858E+02 | 0.1951E-01 | 0.2865E-01 | 0.6129E+02 |
| 0.3281E-01 | 0.6786E+00 |            |            |            |            |            |            |
| -55        | 0.5551E+02 | 0.5382E-01 | 0.6758E+00 | 0.3996E+02 | 0.3504E-01 | 0.6801E-01 | 0.6253E+02 |
| 0.3032E-01 | 0.7174E+00 |            |            |            |            |            |            |
| -50        | 0.5632E+02 | 0.5017E-01 | 0.7173E+00 | 0.4133E+02 | 0.5016E-01 | 0.1288E+00 | 0.6377E+02 |
| 0.2772E-01 | 0.7531E+00 |            |            |            |            |            |            |
| -45        | 0.5712E+02 | 0.4595E-01 | 0.7556E+00 | 0.4270E+02 | 0.6130E-01 | 0.2073E+00 | 0.6501E+02 |
| 0.2527E-01 | 0.7857E+00 |            |            |            |            |            |            |
| -40        | 0.5792E+02 | 0.4156E-01 | 0.7904E+00 | 0.4408E+02 | 0.6691E-01 | 0.2968E+00 | 0.6625E+02 |
| 0.2290E-01 | 0.8152E+00 |            |            |            |            |            |            |
| -35        | 0.5872E+02 | 0.3680E-01 | 0.8215E+00 | 0.4545E+02 | 0.6724E-01 | 0.3895E+00 | 0.6749E+02 |
| 0.2034E-01 | 0.8417E+00 |            |            |            |            |            |            |
| -30        | 0.5953E+02 | 0.3240E-01 | 0.8489E+00 | 0.4682E+02 | 0.6410E-01 | 0.4796E+00 | 0.6873E+02 |
| 0.1788E-01 | 0.8651E+00 |            |            |            |            |            |            |

V2\_Results\_baseline\_Irena\_accel.dat

|            |            |            |            |            |            |            |            |
|------------|------------|------------|------------|------------|------------|------------|------------|
| -25        | 0.6033E+02 | 0.2835E-01 | 0.8729E+00 | 0.4820E+02 | 0.5882E-01 | 0.5634E+00 | 0.6997E+02 |
| 0.1561E-01 | 0.8856E+00 |            |            |            |            |            |            |
| -20        | 0.6113E+02 | 0.2453E-01 | 0.8938E+00 | 0.4957E+02 | 0.5179E-01 | 0.6384E+00 | 0.7121E+02 |
| 0.1357E-01 | 0.9034E+00 |            |            |            |            |            |            |
| -15        | 0.6194E+02 | 0.2095E-01 | 0.9118E+00 | 0.5094E+02 | 0.4498E-01 | 0.7038E+00 | 0.7245E+02 |
| 0.1178E-01 | 0.9189E+00 |            |            |            |            |            |            |
| -10        | 0.6274E+02 | 0.1774E-01 | 0.9270E+00 | 0.5232E+02 | 0.3829E-01 | 0.7601E+00 | 0.7369E+02 |
| 0.1007E-01 | 0.9323E+00 |            |            |            |            |            |            |
| -5         | 0.6354E+02 | 0.1488E-01 | 0.9399E+00 | 0.5369E+02 | 0.3144E-01 | 0.8070E+00 | 0.7494E+02 |
| 0.8625E-02 | 0.9437E+00 |            |            |            |            |            |            |
| 0          | 0.6434E+02 | 0.1248E-01 | 0.9506E+00 | 0.5506E+02 | 0.2574E-01 | 0.8453E+00 | 0.7618E+02 |
| 0.7248E-02 | 0.9533E+00 |            |            |            |            |            |            |
| 5          | 0.6515E+02 | 0.1041E-01 | 0.9596E+00 | 0.5644E+02 | 0.2084E-01 | 0.8765E+00 | 0.7742E+02 |
| 0.6047E-02 | 0.9614E+00 |            |            |            |            |            |            |
| 10         | 0.6595E+02 | 0.8641E-02 | 0.9671E+00 | 0.5781E+02 | 0.1682E-01 | 0.9018E+00 | 0.7866E+02 |
| 0.5045E-02 | 0.9681E+00 |            |            |            |            |            |            |
| 15         | 0.6675E+02 | 0.7151E-02 | 0.9733E+00 | 0.5918E+02 | 0.1327E-01 | 0.9219E+00 | 0.7990E+02 |
| 0.4282E-02 | 0.9738E+00 |            |            |            |            |            |            |
| 20         | 0.6756E+02 | 0.5902E-02 | 0.9785E+00 | 0.6055E+02 | 0.1062E-01 | 0.9378E+00 | 0.8114E+02 |
| 0.3542E-02 | 0.9786E+00 |            |            |            |            |            |            |
| 25         | 0.6836E+02 | 0.4724E-02 | 0.9826E+00 | 0.6193E+02 | 0.8566E-02 | 0.9507E+00 | 0.8238E+02 |
| 0.2819E-02 | 0.9824E+00 |            |            |            |            |            |            |
| 30         | 0.6916E+02 | 0.3912E-02 | 0.9860E+00 | 0.6330E+02 | 0.7032E-02 | 0.9612E+00 | 0.8362E+02 |
| 0.2318E-02 | 0.9855E+00 |            |            |            |            |            |            |
| 35         | 0.6996E+02 | 0.3233E-02 | 0.9888E+00 | 0.6467E+02 | 0.5620E-02 | 0.9697E+00 | 0.8486E+02 |
| 0.1966E-02 | 0.9882E+00 |            |            |            |            |            |            |
| 40         | 0.7077E+02 | 0.2593E-02 | 0.9911E+00 | 0.6605E+02 | 0.4235E-02 | 0.9762E+00 | 0.8610E+02 |
| 0.1647E-02 | 0.9904E+00 |            |            |            |            |            |            |
| 45         | 0.7157E+02 | 0.2042E-02 | 0.9929E+00 | 0.6742E+02 | 0.3316E-02 | 0.9812E+00 | 0.8734E+02 |
| 0.1307E-02 | 0.9921E+00 |            |            |            |            |            |            |
| 50         | 0.7237E+02 | 0.1694E-02 | 0.9944E+00 | 0.6879E+02 | 0.2611E-02 | 0.9852E+00 | 0.8858E+02 |
| 0.1065E-02 | 0.9936E+00 |            |            |            |            |            |            |
| 55         | 0.7318E+02 | 0.1383E-02 | 0.9956E+00 | 0.7017E+02 | 0.2019E-02 | 0.9883E+00 | 0.8983E+02 |
| 0.8950E-03 | 0.9948E+00 |            |            |            |            |            |            |
| 60         | 0.7398E+02 | 0.1126E-02 | 0.9966E+00 | 0.7154E+02 | 0.1572E-02 | 0.9907E+00 | 0.9107E+02 |
| 0.7293E-03 | 0.9958E+00 |            |            |            |            |            |            |

V2\_Results\_baseline\_Irena\_accel.dat

|            |            |            |            |            |            |            |            |
|------------|------------|------------|------------|------------|------------|------------|------------|
| 65         | 0.7478E+02 | 0.8329E-03 | 0.9973E+00 | 0.7291E+02 | 0.1299E-02 | 0.9926E+00 | 0.9231E+02 |
| 0.5949E-03 | 0.9966E+00 |            |            |            |            |            |            |
| 70         | 0.7558E+02 | 0.6401E-03 | 0.9979E+00 | 0.7429E+02 | 0.1043E-02 | 0.9942E+00 | 0.9355E+02 |
| 0.5132E-03 | 0.9972E+00 |            |            |            |            |            |            |
| 75         | 0.7639E+02 | 0.5097E-03 | 0.9983E+00 | 0.7566E+02 | 0.7700E-03 | 0.9954E+00 | 0.9479E+02 |
| 0.4437E-03 | 0.9978E+00 |            |            |            |            |            |            |
| 80         | 0.7719E+02 | 0.4312E-03 | 0.9987E+00 | 0.7703E+02 | 0.6260E-03 | 0.9963E+00 | 0.9603E+02 |
| 0.3672E-03 | 0.9983E+00 |            |            |            |            |            |            |
| 85         | 0.7799E+02 | 0.3195E-03 | 0.9990E+00 | 0.7841E+02 | 0.5364E-03 | 0.9971E+00 | 0.9727E+02 |
| 0.2783E-03 | 0.9987E+00 |            |            |            |            |            |            |
| 90         | 0.7880E+02 | 0.2304E-03 | 0.9992E+00 | 0.7978E+02 | 0.4157E-03 | 0.9977E+00 | 0.9851E+02 |
| 0.2094E-03 | 0.9990E+00 |            |            |            |            |            |            |
| 95         | 0.7960E+02 | 0.1592E-03 | 0.9994E+00 | 0.8115E+02 | 0.3405E-03 | 0.9982E+00 | 0.9975E+02 |
| 0.1495E-03 | 0.9992E+00 |            |            |            |            |            |            |
| 100        | 0.8040E+02 | 0.1219E-03 | 0.9995E+00 | 0.8252E+02 | 0.2698E-03 | 0.9986E+00 | 0.1010E+03 |
| 0.1107E-03 | 0.9994E+00 |            |            |            |            |            |            |
| 105        | 0.8120E+02 | 0.1079E-03 | 0.9996E+00 | 0.8390E+02 | 0.1851E-03 | 0.9989E+00 | 0.1022E+03 |
| 0.7870E-04 | 0.9995E+00 |            |            |            |            |            |            |
| 110        | 0.8201E+02 | 0.8816E-04 | 0.9996E+00 | 0.8527E+02 | 0.1270E-03 | 0.9991E+00 | 0.1035E+03 |
| 0.6461E-04 | 0.9996E+00 |            |            |            |            |            |            |
| 115        | 0.8281E+02 | 0.5819E-04 | 0.9997E+00 | 0.8664E+02 | 0.1105E-03 | 0.9993E+00 | 0.1047E+03 |
| 0.5445E-04 | 0.9996E+00 |            |            |            |            |            |            |
| 120        | 0.8361E+02 | 0.6082E-04 | 0.9997E+00 | 0.8802E+02 | 0.7996E-04 | 0.9994E+00 | 0.1060E+03 |
| 0.5288E-04 | 0.9997E+00 |            |            |            |            |            |            |
| 125        | 0.8442E+02 | 0.5866E-04 | 0.9998E+00 | 0.8939E+02 | 0.7080E-04 | 0.9995E+00 | 0.1072E+03 |
| 0.5427E-04 | 0.9998E+00 |            |            |            |            |            |            |
| 130        | 0.8522E+02 | 0.5033E-04 | 0.9998E+00 | 0.9076E+02 | 0.6272E-04 | 0.9996E+00 | 0.1084E+03 |
| 0.3876E-04 | 0.9998E+00 |            |            |            |            |            |            |
| 135        | 0.8602E+02 | 0.2961E-04 | 0.9999E+00 | 0.9214E+02 | 0.4836E-04 | 0.9997E+00 | 0.1097E+03 |
| 0.2408E-04 | 0.9999E+00 |            |            |            |            |            |            |
| 140        | 0.8682E+02 | 0.2931E-04 | 0.9999E+00 | 0.9351E+02 | 0.7609E-04 | 0.9998E+00 | 0.1109E+03 |
| 0.1221E-04 | 0.9999E+00 |            |            |            |            |            |            |
| 145        | 0.8763E+02 | 0.2994E-04 | 0.9999E+00 | 0.9488E+02 | 0.5140E-04 | 0.9998E+00 | 0.1122E+03 |
| 0.1133E-04 | 0.9999E+00 |            |            |            |            |            |            |
| 150        | 0.8843E+02 | 0.2375E-04 | 0.9999E+00 | 0.9626E+02 | 0.2112E-04 | 0.9999E+00 | 0.1134E+03 |
| 0.9823E-05 | 0.9999E+00 |            |            |            |            |            |            |

V2\_Results\_baseline\_Irena\_accel.dat

|            |            |            |            |            |            |            |            |
|------------|------------|------------|------------|------------|------------|------------|------------|
| 155        | 0.8923E+02 | 0.1215E-04 | 0.9999E+00 | 0.9763E+02 | 0.1742E-04 | 0.9999E+00 | 0.1146E+03 |
| 0.1310E-04 | 0.9999E+00 |            |            |            |            |            |            |
| 160        | 0.9004E+02 | 0.8123E-05 | 0.9999E+00 | 0.9900E+02 | 0.1725E-04 | 0.9999E+00 | 0.1159E+03 |
| 0.1753E-04 | 0.9999E+00 |            |            |            |            |            |            |
| 165        | 0.9084E+02 | 0.1304E-04 | 0.1000E+01 | 0.1004E+03 | 0.1092E-04 | 0.1000E+01 | 0.1171E+03 |
| 0.1605E-04 | 0.1000E+01 |            |            |            |            |            |            |
| 170        | 0.9164E+02 | 0.1368E-04 | 0.1000E+01 | 0.1017E+03 | 0.7070E-05 | 0.1000E+01 | 0.1184E+03 |
| 0.7682E-05 | 0.1000E+01 |            |            |            |            |            |            |
| 175        | 0.9244E+02 | 0.7840E-05 | 0.1000E+01 | 0.1031E+03 | 0.9662E-05 | 0.1000E+01 | 0.1196E+03 |
| 0.3542E-05 | 0.1000E+01 |            |            |            |            |            |            |
| 180        | 0.9325E+02 | 0.4804E-05 | 0.1000E+01 | 0.1045E+03 | 0.4469E-05 | 0.1000E+01 | 0.1208E+03 |
| 0.3335E-05 | 0.1000E+01 |            |            |            |            |            |            |
| 185        | 0.9405E+02 | 0.6484E-05 | 0.1000E+01 | 0.1059E+03 | 0.1661E-05 | 0.1000E+01 | 0.1221E+03 |
| 0.4960E-05 | 0.1000E+01 |            |            |            |            |            |            |
| 190        | 0.9485E+02 | 0.5986E-05 | 0.1000E+01 | 0.1072E+03 | 0.0000E+00 | 0.1000E+01 | 0.1233E+03 |
| 0.3376E-05 | 0.1000E+01 |            |            |            |            |            |            |
| 195        | 0.9566E+02 | 0.7834E-05 | 0.1000E+01 | 0.1086E+03 | 0.8448E-06 | 0.1000E+01 | 0.1246E+03 |
| 0.4177E-05 | 0.1000E+01 |            |            |            |            |            |            |
| 200        | 0.9646E+02 | 0.6503E-05 | 0.1000E+01 | 0.1100E+03 | 0.4442E-05 | 0.1000E+01 | 0.1258E+03 |
| 0.3075E-05 | 0.1000E+01 |            |            |            |            |            |            |

| #    | *****       | Standardised | *****       |            |             |            |
|------|-------------|--------------|-------------|------------|-------------|------------|
| -200 | -0.3324E+01 | 0.3155E-04   | -0.1980E+01 | 0.2044E-02 | -0.3017E+01 | 0.6947E-04 |
| -195 | -0.3196E+01 | 0.7392E-04   | -0.1847E+01 | 0.8748E-02 | -0.2896E+01 | 0.1890E-03 |
| -190 | -0.3069E+01 | 0.2136E-03   | -0.1714E+01 | 0.2781E-01 | -0.2775E+01 | 0.5380E-03 |
| -185 | -0.2941E+01 | 0.3482E-03   | -0.1581E+01 | 0.6446E-01 | -0.2654E+01 | 0.1376E-02 |
| -180 | -0.2814E+01 | 0.6544E-03   | -0.1447E+01 | 0.1196E+00 | -0.2533E+01 | 0.3146E-02 |
| -175 | -0.2687E+01 | 0.1484E-02   | -0.1314E+01 | 0.1903E+00 | -0.2412E+01 | 0.6018E-02 |
| -170 | -0.2559E+01 | 0.3183E-02   | -0.1181E+01 | 0.2681E+00 | -0.2292E+01 | 0.1022E-01 |
| -165 | -0.2432E+01 | 0.5945E-02   | -0.1048E+01 | 0.3421E+00 | -0.2171E+01 | 0.1740E-01 |
| -160 | -0.2304E+01 | 0.1064E-01   | -0.9143E+00 | 0.4023E+00 | -0.2050E+01 | 0.2825E-01 |
| -155 | -0.2177E+01 | 0.1833E-01   | -0.7810E+00 | 0.4476E+00 | -0.1929E+01 | 0.4332E-01 |
| -150 | -0.2050E+01 | 0.2995E-01   | -0.6477E+00 | 0.4722E+00 | -0.1808E+01 | 0.6230E-01 |
| -145 | -0.1922E+01 | 0.4635E-01   | -0.5145E+00 | 0.4794E+00 | -0.1687E+01 | 0.8617E-01 |
| -140 | -0.1795E+01 | 0.6853E-01   | -0.3812E+00 | 0.4718E+00 | -0.1566E+01 | 0.1151E+00 |

V2\_Results\_baseline\_Irena\_accel.dat

|      |             |            |             |            |             |            |
|------|-------------|------------|-------------|------------|-------------|------------|
| -135 | -0.1667E+01 | 0.9434E-01 | -0.2479E+00 | 0.4541E+00 | -0.1445E+01 | 0.1492E+00 |
| -130 | -0.1540E+01 | 0.1253E+00 | -0.1147E+00 | 0.4294E+00 | -0.1324E+01 | 0.1893E+00 |
| -125 | -0.1412E+01 | 0.1619E+00 | 0.1862E-01  | 0.3988E+00 | -0.1203E+01 | 0.2320E+00 |
| -120 | -0.1285E+01 | 0.2022E+00 | 0.1519E+00  | 0.3641E+00 | -0.1082E+01 | 0.2743E+00 |
| -115 | -0.1158E+01 | 0.2428E+00 | 0.2852E+00  | 0.3301E+00 | -0.9615E+00 | 0.3108E+00 |
| -110 | -0.1030E+01 | 0.2827E+00 | 0.4184E+00  | 0.2993E+00 | -0.8406E+00 | 0.3416E+00 |
| -105 | -0.9028E+00 | 0.3196E+00 | 0.5517E+00  | 0.2655E+00 | -0.7196E+00 | 0.3664E+00 |
| -100 | -0.7754E+00 | 0.3518E+00 | 0.6850E+00  | 0.2319E+00 | -0.5987E+00 | 0.3866E+00 |
| -95  | -0.6480E+00 | 0.3758E+00 | 0.8183E+00  | 0.2019E+00 | -0.4778E+00 | 0.4009E+00 |
| -90  | -0.5206E+00 | 0.3937E+00 | 0.9515E+00  | 0.1756E+00 | -0.3569E+00 | 0.4130E+00 |
| -85  | -0.3932E+00 | 0.4052E+00 | 0.1085E+01  | 0.1518E+00 | -0.2360E+00 | 0.4164E+00 |
| -80  | -0.2658E+00 | 0.4089E+00 | 0.1218E+01  | 0.1314E+00 | -0.1151E+00 | 0.4127E+00 |
| -75  | -0.1384E+00 | 0.4074E+00 | 0.1351E+01  | 0.1130E+00 | 0.5861E-02  | 0.3994E+00 |
| -70  | -0.1098E-01 | 0.3990E+00 | 0.1485E+01  | 0.9551E-01 | 0.1268E+00  | 0.3816E+00 |
| -65  | 0.1164E+00  | 0.3822E+00 | 0.1618E+01  | 0.8193E-01 | 0.2477E+00  | 0.3598E+00 |
| -60  | 0.2438E+00  | 0.3611E+00 | 0.1751E+01  | 0.7093E-01 | 0.3686E+00  | 0.3367E+00 |
| -55  | 0.3713E+00  | 0.3391E+00 | 0.1884E+01  | 0.6085E-01 | 0.4895E+00  | 0.3112E+00 |
| -50  | 0.4987E+00  | 0.3162E+00 | 0.2018E+01  | 0.5292E-01 | 0.6104E+00  | 0.2845E+00 |
| -45  | 0.6261E+00  | 0.2895E+00 | 0.2151E+01  | 0.4624E-01 | 0.7314E+00  | 0.2593E+00 |
| -40  | 0.7535E+00  | 0.2619E+00 | 0.2284E+01  | 0.3927E-01 | 0.8523E+00  | 0.2350E+00 |
| -35  | 0.8809E+00  | 0.2319E+00 | 0.2418E+01  | 0.3229E-01 | 0.9732E+00  | 0.2087E+00 |
| -30  | 0.1008E+01  | 0.2042E+00 | 0.2551E+01  | 0.2707E-01 | 0.1094E+01  | 0.1835E+00 |
| -25  | 0.1136E+01  | 0.1786E+00 | 0.2684E+01  | 0.2288E-01 | 0.1215E+01  | 0.1602E+00 |
| -20  | 0.1263E+01  | 0.1546E+00 | 0.2817E+01  | 0.1946E-01 | 0.1336E+01  | 0.1393E+00 |
| -15  | 0.1391E+01  | 0.1320E+00 | 0.2951E+01  | 0.1632E-01 | 0.1457E+01  | 0.1209E+00 |
| -10  | 0.1518E+01  | 0.1118E+00 | 0.3084E+01  | 0.1364E-01 | 0.1578E+01  | 0.1033E+00 |
| -5   | 0.1645E+01  | 0.9379E-01 | 0.3217E+01  | 0.1148E-01 | 0.1699E+01  | 0.8851E-01 |
| 0    | 0.1773E+01  | 0.7867E-01 | 0.3350E+01  | 0.1015E-01 | 0.1820E+01  | 0.7438E-01 |
| 5    | 0.1900E+01  | 0.6558E-01 | 0.3484E+01  | 0.8858E-02 | 0.1941E+01  | 0.6206E-01 |
| 10   | 0.2028E+01  | 0.5445E-01 | 0.3617E+01  | 0.7542E-02 | 0.2061E+01  | 0.5177E-01 |
| 15   | 0.2155E+01  | 0.4506E-01 | 0.3750E+01  | 0.6120E-02 | 0.2182E+01  | 0.4395E-01 |
| 20   | 0.2282E+01  | 0.3719E-01 | 0.3884E+01  | 0.5006E-02 | 0.2303E+01  | 0.3635E-01 |
| 25   | 0.2410E+01  | 0.2977E-01 | 0.4017E+01  | 0.4451E-02 | 0.2424E+01  | 0.2893E-01 |
| 30   | 0.2537E+01  | 0.2465E-01 | 0.4150E+01  | 0.4047E-02 | 0.2545E+01  | 0.2379E-01 |
| 35   | 0.2665E+01  | 0.2038E-01 | 0.4283E+01  | 0.3445E-02 | 0.2666E+01  | 0.2018E-01 |
| 40   | 0.2792E+01  | 0.1634E-01 | 0.4417E+01  | 0.2914E-02 | 0.2787E+01  | 0.1690E-01 |

V2\_Results\_baseline\_Irena\_accel.dat

|     |            |            |            |            |            |            |
|-----|------------|------------|------------|------------|------------|------------|
| 45  | 0.2919E+01 | 0.1287E-01 | 0.4550E+01 | 0.2498E-02 | 0.2908E+01 | 0.1341E-01 |
| 50  | 0.3047E+01 | 0.1067E-01 | 0.4683E+01 | 0.2193E-02 | 0.3029E+01 | 0.1093E-01 |
| 55  | 0.3174E+01 | 0.8712E-02 | 0.4816E+01 | 0.1835E-02 | 0.3150E+01 | 0.9185E-02 |
| 60  | 0.3302E+01 | 0.7097E-02 | 0.4950E+01 | 0.1454E-02 | 0.3271E+01 | 0.7484E-02 |
| 65  | 0.3429E+01 | 0.5248E-02 | 0.5083E+01 | 0.1112E-02 | 0.3392E+01 | 0.6105E-02 |
| 70  | 0.3557E+01 | 0.4034E-02 | 0.5216E+01 | 0.8688E-03 | 0.3512E+01 | 0.5266E-02 |
| 75  | 0.3684E+01 | 0.3212E-02 | 0.5349E+01 | 0.7880E-03 | 0.3633E+01 | 0.4553E-02 |
| 80  | 0.3811E+01 | 0.2717E-02 | 0.5483E+01 | 0.6801E-03 | 0.3754E+01 | 0.3768E-02 |
| 85  | 0.3939E+01 | 0.2013E-02 | 0.5616E+01 | 0.5010E-03 | 0.3875E+01 | 0.2856E-02 |
| 90  | 0.4066E+01 | 0.1452E-02 | 0.5749E+01 | 0.4993E-03 | 0.3996E+01 | 0.2149E-02 |
| 95  | 0.4194E+01 | 0.1003E-02 | 0.5883E+01 | 0.4993E-03 | 0.4117E+01 | 0.1534E-02 |
| 100 | 0.4321E+01 | 0.7679E-03 | 0.6016E+01 | 0.4063E-03 | 0.4238E+01 | 0.1136E-02 |
| 105 | 0.4448E+01 | 0.6801E-03 | 0.6149E+01 | 0.3361E-03 | 0.4359E+01 | 0.8076E-03 |
| 110 | 0.4576E+01 | 0.5555E-03 | 0.6282E+01 | 0.4930E-03 | 0.4480E+01 | 0.6631E-03 |
| 115 | 0.4703E+01 | 0.3667E-03 | 0.6416E+01 | 0.5154E-03 | 0.4601E+01 | 0.5588E-03 |
| 120 | 0.4831E+01 | 0.3832E-03 | 0.6549E+01 | 0.3506E-03 | 0.4722E+01 | 0.5427E-03 |
| 125 | 0.4958E+01 | 0.3696E-03 | 0.6682E+01 | 0.1880E-03 | 0.4842E+01 | 0.5570E-03 |
| 130 | 0.5085E+01 | 0.3171E-03 | 0.6815E+01 | 0.1440E-03 | 0.4963E+01 | 0.3978E-03 |
| 135 | 0.5213E+01 | 0.1866E-03 | 0.6949E+01 | 0.1194E-03 | 0.5084E+01 | 0.2471E-03 |
| 140 | 0.5340E+01 | 0.1847E-03 | 0.7082E+01 | 0.1232E-03 | 0.5205E+01 | 0.1253E-03 |
| 145 | 0.5468E+01 | 0.1887E-03 | 0.7215E+01 | 0.1001E-03 | 0.5326E+01 | 0.1163E-03 |
| 150 | 0.5595E+01 | 0.1497E-03 | 0.7349E+01 | 0.6663E-04 | 0.5447E+01 | 0.1008E-03 |
| 155 | 0.5722E+01 | 0.7655E-04 | 0.7482E+01 | 0.4640E-04 | 0.5568E+01 | 0.1344E-03 |
| 160 | 0.5850E+01 | 0.5119E-04 | 0.7615E+01 | 0.6210E-04 | 0.5689E+01 | 0.1799E-03 |
| 165 | 0.5977E+01 | 0.8219E-04 | 0.7748E+01 | 0.6931E-04 | 0.5810E+01 | 0.1647E-03 |
| 170 | 0.6105E+01 | 0.8620E-04 | 0.7882E+01 | 0.3443E-04 | 0.5931E+01 | 0.7883E-04 |
| 175 | 0.6232E+01 | 0.4941E-04 | 0.8015E+01 | 0.2492E-04 | 0.6052E+01 | 0.3635E-04 |
| 180 | 0.6360E+01 | 0.3027E-04 | 0.8148E+01 | 0.0000E+00 | 0.6173E+01 | 0.3423E-04 |
| 185 | 0.6487E+01 | 0.4086E-04 | 0.8281E+01 | 0.0000E+00 | 0.6293E+01 | 0.5090E-04 |
| 190 | 0.6614E+01 | 0.3772E-04 | 0.8415E+01 | 0.0000E+00 | 0.6414E+01 | 0.3464E-04 |
| 195 | 0.6742E+01 | 0.4937E-04 | 0.8548E+01 | 0.1953E-04 | 0.6535E+01 | 0.4287E-04 |
| 200 | 0.6869E+01 | 0.4098E-04 | 0.8681E+01 | 0.3158E-04 | 0.6656E+01 | 0.3156E-04 |

\*\*\*\*\*

\*\*\* p.d.f. LCE (US\$/MWh): TOTAL 2020, 2030, 2040 ,2050 (Smoothed, Not standardised) \*\*\*

# V2\_Results\_baseline\_Irena\_accel.dat

```

#*****
#
#          2020          2030          2040          2050
#
#  *****      NOT standardised      *****
#
# -200  0.3496E+02  0.1573E-04  0.1146E+00  0.5045E-05  0.5674E+02  0.1340E-04  0.2109E+02
# 0.2677E-04
# -195  0.3602E+02  0.3852E-04  0.1261E+01  0.1381E-05  0.5768E+02  0.2466E-04  0.2193E+02
# 0.8370E-04
# -190  0.3708E+02  0.7740E-04  0.2407E+01  0.0000E+00  0.5863E+02  0.5116E-04  0.2278E+02
# 0.2015E-03
# -185  0.3813E+02  0.1987E-03  0.3553E+01  0.0000E+00  0.5958E+02  0.1461E-03  0.2363E+02
# 0.4488E-03
# -180  0.3919E+02  0.4864E-03  0.4699E+01  0.0000E+00  0.6052E+02  0.3317E-03  0.2448E+02
# 0.9305E-03
# -175  0.4025E+02  0.1029E-02  0.5845E+01  0.0000E+00  0.6147E+02  0.6659E-03  0.2532E+02
# 0.1825E-02
# -170  0.4130E+02  0.1942E-02  0.6991E+01  0.0000E+00  0.6242E+02  0.1278E-02  0.2617E+02
# 0.3570E-02
# -165  0.4236E+02  0.3469E-02  0.8137E+01  0.0000E+00  0.6336E+02  0.2291E-02  0.2702E+02
# 0.6289E-02
# -160  0.4342E+02  0.6098E-02  0.9283E+01  0.0000E+00  0.6431E+02  0.3902E-02  0.2786E+02
# 0.9949E-02
# -155  0.4447E+02  0.9591E-02  0.1043E+02  0.0000E+00  0.6526E+02  0.6277E-02  0.2871E+02
# 0.1503E-01
# -150  0.4553E+02  0.1387E-01  0.1157E+02  0.0000E+00  0.6620E+02  0.9391E-02  0.2956E+02
# 0.2126E-01
# -145  0.4659E+02  0.1887E-01  0.1272E+02  0.0000E+00  0.6715E+02  0.1321E-01  0.3041E+02
# 0.2833E-01
# -140  0.4764E+02  0.2448E-01  0.1387E+02  0.0000E+00  0.6810E+02  0.1789E-01  0.3125E+02
# 0.3598E-01
# -135  0.4870E+02  0.3051E-01  0.1501E+02  0.0000E+00  0.6904E+02  0.2338E-01  0.3210E+02
# 0.4366E-01
# -130  0.4976E+02  0.3657E-01  0.1616E+02  0.0000E+00  0.6999E+02  0.2912E-01  0.3295E+02
# 0.5075E-01
# -125  0.5082E+02  0.4243E-01  0.1731E+02  0.0000E+00  0.7093E+02  0.3497E-01  0.3380E+02

```

V2\_Results\_baseline\_Irena\_accel.dat

|            |            |            |            |            |            |            |            |
|------------|------------|------------|------------|------------|------------|------------|------------|
| 0.5703E-01 |            |            |            |            |            |            |            |
| -120       | 0.5187E+02 | 0.4740E-01 | 0.1845E+02 | 0.0000E+00 | 0.7188E+02 | 0.4045E-01 | 0.3464E+02 |
| 0.6194E-01 |            |            |            |            |            |            |            |
| -115       | 0.5293E+02 | 0.5140E-01 | 0.1960E+02 | 0.0000E+00 | 0.7283E+02 | 0.4531E-01 | 0.3549E+02 |
| 0.6483E-01 |            |            |            |            |            |            |            |
| -110       | 0.5399E+02 | 0.5378E-01 | 0.2074E+02 | 0.0000E+00 | 0.7377E+02 | 0.4929E-01 | 0.3634E+02 |
| 0.6680E-01 |            |            |            |            |            |            |            |
| -105       | 0.5504E+02 | 0.5492E-01 | 0.2189E+02 | 0.0000E+00 | 0.7472E+02 | 0.5304E-01 | 0.3718E+02 |
| 0.6784E-01 |            |            |            |            |            |            |            |
| -100       | 0.5610E+02 | 0.5492E-01 | 0.2304E+02 | 0.0000E+00 | 0.7567E+02 | 0.5568E-01 | 0.3803E+02 |
| 0.6732E-01 |            |            |            |            |            |            |            |
| -95        | 0.5716E+02 | 0.5368E-01 | 0.2418E+02 | 0.0000E+00 | 0.7661E+02 | 0.5689E-01 | 0.3888E+02 |
| 0.6524E-01 |            |            |            |            |            |            |            |
| -90        | 0.5821E+02 | 0.5137E-01 | 0.2533E+02 | 0.7200E-06 | 0.7756E+02 | 0.5628E-01 | 0.3973E+02 |
| 0.6221E-01 |            |            |            |            |            |            |            |
| -85        | 0.5927E+02 | 0.4868E-01 | 0.2647E+02 | 0.9667E-05 | 0.7851E+02 | 0.5464E-01 | 0.4057E+02 |
| 0.5767E-01 |            |            |            |            |            |            |            |
| -80        | 0.6033E+02 | 0.4483E-01 | 0.2762E+02 | 0.4189E-04 | 0.7945E+02 | 0.5279E-01 | 0.4142E+02 |
| 0.5266E-01 |            |            |            |            |            |            |            |
| -75        | 0.6139E+02 | 0.4047E-01 | 0.2877E+02 | 0.2182E-03 | 0.8040E+02 | 0.5061E-01 | 0.4227E+02 |
| 0.4750E-01 |            |            |            |            |            |            |            |
| -70        | 0.6244E+02 | 0.3658E-01 | 0.2991E+02 | 0.6858E-03 | 0.8135E+02 | 0.4780E-01 | 0.4312E+02 |
| 0.4288E-01 |            |            |            |            |            |            |            |
| -65        | 0.6350E+02 | 0.3252E-01 | 0.3106E+02 | 0.1894E-02 | 0.8229E+02 | 0.4414E-01 | 0.4396E+02 |
| 0.3782E-01 |            |            |            |            |            |            |            |
| -60        | 0.6456E+02 | 0.2830E-01 | 0.3220E+02 | 0.4249E-02 | 0.8324E+02 | 0.4025E-01 | 0.4481E+02 |
| 0.3292E-01 |            |            |            |            |            |            |            |
| -55        | 0.6561E+02 | 0.2463E-01 | 0.3335E+02 | 0.8409E-02 | 0.8419E+02 | 0.3635E-01 | 0.4566E+02 |
| 0.2892E-01 |            |            |            |            |            |            |            |
| -50        | 0.6667E+02 | 0.2153E-01 | 0.3450E+02 | 0.1505E-01 | 0.8513E+02 | 0.3270E-01 | 0.4651E+02 |
| 0.2489E-01 |            |            |            |            |            |            |            |
| -45        | 0.6773E+02 | 0.1874E-01 | 0.3564E+02 | 0.2339E-01 | 0.8608E+02 | 0.2938E-01 | 0.4735E+02 |
| 0.2106E-01 |            |            |            |            |            |            |            |
| -40        | 0.6878E+02 | 0.1582E-01 | 0.3679E+02 | 0.3275E-01 | 0.8703E+02 | 0.2585E-01 | 0.4820E+02 |
| 0.1780E-01 |            |            |            |            |            |            |            |
| -35        | 0.6984E+02 | 0.1324E-01 | 0.3793E+02 | 0.4323E-01 | 0.8797E+02 | 0.2238E-01 | 0.4905E+02 |

V2\_Results\_baseline\_Irena\_accel.dat

|            |     |            |            |            |            |            |            |            |
|------------|-----|------------|------------|------------|------------|------------|------------|------------|
| 0.1492E-01 | -30 | 0.7090E+02 | 0.1121E-01 | 0.3908E+02 | 0.5291E-01 | 0.8892E+02 | 0.1925E-01 | 0.4989E+02 |
| 0.1261E-01 | -25 | 0.7196E+02 | 0.9548E-02 | 0.4023E+02 | 0.6038E-01 | 0.8987E+02 | 0.1664E-01 | 0.5074E+02 |
| 0.1058E-01 | -20 | 0.7301E+02 | 0.7870E-02 | 0.4137E+02 | 0.6574E-01 | 0.9081E+02 | 0.1408E-01 | 0.5159E+02 |
| 0.8622E-02 | -15 | 0.7407E+02 | 0.6515E-02 | 0.4252E+02 | 0.6865E-01 | 0.9176E+02 | 0.1213E-01 | 0.5244E+02 |
| 0.6757E-02 | -10 | 0.7513E+02 | 0.5269E-02 | 0.4366E+02 | 0.6760E-01 | 0.9271E+02 | 0.1038E-01 | 0.5328E+02 |
| 0.5612E-02 | -5  | 0.7618E+02 | 0.4222E-02 | 0.4481E+02 | 0.6396E-01 | 0.9365E+02 | 0.8666E-02 | 0.5413E+02 |
| 0.4801E-02 | 0   | 0.7724E+02 | 0.3415E-02 | 0.4596E+02 | 0.5951E-01 | 0.9460E+02 | 0.7100E-02 | 0.5498E+02 |
| 0.3971E-02 | 5   | 0.7830E+02 | 0.2846E-02 | 0.4710E+02 | 0.5305E-01 | 0.9555E+02 | 0.5877E-02 | 0.5583E+02 |
| 0.3143E-02 | 10  | 0.7935E+02 | 0.2361E-02 | 0.4825E+02 | 0.4638E-01 | 0.9649E+02 | 0.4781E-02 | 0.5667E+02 |
| 0.2466E-02 | 15  | 0.8041E+02 | 0.1841E-02 | 0.4939E+02 | 0.4029E-01 | 0.9744E+02 | 0.3840E-02 | 0.5752E+02 |
| 0.2001E-02 | 20  | 0.8147E+02 | 0.1451E-02 | 0.5054E+02 | 0.3461E-01 | 0.9839E+02 | 0.3171E-02 | 0.5837E+02 |
| 0.1699E-02 | 25  | 0.8252E+02 | 0.1258E-02 | 0.5169E+02 | 0.2832E-01 | 0.9933E+02 | 0.2677E-02 | 0.5921E+02 |
| 0.1411E-02 | 30  | 0.8358E+02 | 0.1046E-02 | 0.5283E+02 | 0.2213E-01 | 0.1003E+03 | 0.2253E-02 | 0.6006E+02 |
| 0.1070E-02 | 35  | 0.8464E+02 | 0.8292E-03 | 0.5398E+02 | 0.1787E-01 | 0.1012E+03 | 0.1801E-02 | 0.6091E+02 |
| 0.9037E-03 | 40  | 0.8570E+02 | 0.6500E-03 | 0.5512E+02 | 0.1441E-01 | 0.1022E+03 | 0.1435E-02 | 0.6176E+02 |
| 0.7758E-03 | 45  | 0.8675E+02 | 0.5395E-03 | 0.5627E+02 | 0.1137E-01 | 0.1031E+03 | 0.1166E-02 | 0.6260E+02 |
| 0.5932E-03 | 50  | 0.8781E+02 | 0.4628E-03 | 0.5742E+02 | 0.8647E-02 | 0.1041E+03 | 0.9170E-03 | 0.6345E+02 |
| 0.4358E-03 | 55  | 0.8887E+02 | 0.3807E-03 | 0.5856E+02 | 0.6392E-02 | 0.1050E+03 | 0.6982E-03 | 0.6430E+02 |

V2\_Results\_baseline\_Irena\_accel.dat

|            |     |            |            |            |            |            |            |            |
|------------|-----|------------|------------|------------|------------|------------|------------|------------|
| 0.3753E-03 | 60  | 0.8992E+02 | 0.3112E-03 | 0.5971E+02 | 0.4947E-02 | 0.1060E+03 | 0.5393E-03 | 0.6515E+02 |
| 0.3320E-03 | 65  | 0.9098E+02 | 0.2528E-03 | 0.6085E+02 | 0.3775E-02 | 0.1069E+03 | 0.4409E-03 | 0.6599E+02 |
| 0.2610E-03 | 70  | 0.9204E+02 | 0.2141E-03 | 0.6200E+02 | 0.2893E-02 | 0.1079E+03 | 0.3538E-03 | 0.6684E+02 |
| 0.1884E-03 | 75  | 0.9309E+02 | 0.1977E-03 | 0.6315E+02 | 0.2217E-02 | 0.1088E+03 | 0.2947E-03 | 0.6769E+02 |
| 0.1729E-03 | 80  | 0.9415E+02 | 0.1734E-03 | 0.6429E+02 | 0.1633E-02 | 0.1097E+03 | 0.2409E-03 | 0.6853E+02 |
| 0.1643E-03 | 85  | 0.9521E+02 | 0.1281E-03 | 0.6544E+02 | 0.1247E-02 | 0.1107E+03 | 0.2093E-03 | 0.6938E+02 |
| 0.1236E-03 | 90  | 0.9627E+02 | 0.8668E-04 | 0.6658E+02 | 0.9072E-03 | 0.1116E+03 | 0.1627E-03 | 0.7023E+02 |
| 0.9173E-04 | 95  | 0.9732E+02 | 0.6181E-04 | 0.6773E+02 | 0.6591E-03 | 0.1126E+03 | 0.1098E-03 | 0.7108E+02 |
| 0.5988E-04 | 100 | 0.9838E+02 | 0.5355E-04 | 0.6888E+02 | 0.5173E-03 | 0.1135E+03 | 0.8107E-04 | 0.7192E+02 |
| 0.4484E-04 | 105 | 0.9944E+02 | 0.4301E-04 | 0.7002E+02 | 0.3999E-03 | 0.1145E+03 | 0.8630E-04 | 0.7277E+02 |
| 0.4775E-04 | 110 | 0.1005E+03 | 0.4171E-04 | 0.7117E+02 | 0.3233E-03 | 0.1154E+03 | 0.9470E-04 | 0.7362E+02 |
| 0.4392E-04 | 115 | 0.1016E+03 | 0.4164E-04 | 0.7232E+02 | 0.2316E-03 | 0.1164E+03 | 0.7516E-04 | 0.7447E+02 |
| 0.4517E-04 | 120 | 0.1026E+03 | 0.4961E-04 | 0.7346E+02 | 0.1646E-03 | 0.1173E+03 | 0.4153E-04 | 0.7531E+02 |
| 0.4429E-04 | 125 | 0.1037E+03 | 0.4352E-04 | 0.7461E+02 | 0.9365E-04 | 0.1183E+03 | 0.3070E-04 | 0.7616E+02 |
| 0.4091E-04 | 130 | 0.1047E+03 | 0.3533E-04 | 0.7575E+02 | 0.7798E-04 | 0.1192E+03 | 0.2888E-04 | 0.7701E+02 |
| 0.2396E-04 | 135 | 0.1058E+03 | 0.1668E-04 | 0.7690E+02 | 0.8294E-04 | 0.1202E+03 | 0.2021E-04 | 0.7785E+02 |
| 0.1449E-04 | 140 | 0.1068E+03 | 0.8985E-05 | 0.7805E+02 | 0.5605E-04 | 0.1211E+03 | 0.1124E-04 | 0.7870E+02 |
| 0.9941E-05 | 145 | 0.1079E+03 | 0.8412E-05 | 0.7919E+02 | 0.2664E-04 | 0.1221E+03 | 0.1091E-04 | 0.7955E+02 |

# V2\_Results\_baseline\_Irena\_accel.dat

```

0.5428E-05
 150  0.1089E+03  0.1199E-04  0.8034E+02  0.1357E-04  0.1230E+03  0.9177E-05  0.8040E+02
0.0000E+00
 155  0.1100E+03  0.1156E-04  0.8148E+02  0.1435E-04  0.1239E+03  0.1029E-04  0.8124E+02
0.3842E-05
 160  0.1111E+03  0.6428E-05  0.8263E+02  0.1993E-04  0.1249E+03  0.1116E-04  0.8209E+02
0.1318E-04
 165  0.1121E+03  0.1716E-05  0.8378E+02  0.2489E-04  0.1258E+03  0.8835E-05  0.8294E+02
0.2393E-04
 170  0.1132E+03  0.3910E-05  0.8492E+02  0.1795E-04  0.1268E+03  0.3214E-05  0.8379E+02
0.2420E-04
 175  0.1142E+03  0.1136E-04  0.8607E+02  0.2407E-05  0.1277E+03  0.0000E+00  0.8463E+02
0.1341E-04
 180  0.1153E+03  0.1579E-04  0.8721E+02  0.0000E+00  0.1287E+03  0.0000E+00  0.8548E+02
0.4249E-05
 185  0.1163E+03  0.1323E-04  0.8836E+02  0.1182E-05  0.1296E+03  0.0000E+00  0.8633E+02
0.2989E-05
 190  0.1174E+03  0.5560E-05  0.8951E+02  0.5025E-05  0.1306E+03  0.0000E+00  0.8717E+02
0.5042E-05
 195  0.1185E+03  0.6244E-05  0.9065E+02  0.4142E-05  0.1315E+03  0.2770E-05  0.8802E+02
0.6836E-05
 200  0.1195E+03  0.5331E-05  0.9180E+02  0.5045E-05  0.1325E+03  0.4251E-05  0.8887E+02
0.5049E-05

```

# \*\*\*\*\* adaptados para un plot en 3D con gnuplot \*\*\*\*\*

```

0.3496E+02  0.1573E-04  0.2020E+04  0xff0000
0.3602E+02  0.3852E-04  0.2020E+04  0xff0000
0.3708E+02  0.7740E-04  0.2020E+04  0xff0000
0.3813E+02  0.1987E-03  0.2020E+04  0xff0000
0.3919E+02  0.4864E-03  0.2020E+04  0xff0000
0.4025E+02  0.1029E-02  0.2020E+04  0xff0000
0.4130E+02  0.1942E-02  0.2020E+04  0xff0000
0.4236E+02  0.3469E-02  0.2020E+04  0xff0000
0.4342E+02  0.6098E-02  0.2020E+04  0xff0000
0.4447E+02  0.9591E-02  0.2020E+04  0xff0000

```

V2\_Results\_baseline\_Irena\_accel.dat

|            |            |            |          |
|------------|------------|------------|----------|
| 0.4553E+02 | 0.1387E-01 | 0.2020E+04 | 0xff0000 |
| 0.4659E+02 | 0.1887E-01 | 0.2020E+04 | 0xff0000 |
| 0.4764E+02 | 0.2448E-01 | 0.2020E+04 | 0xff0000 |
| 0.4870E+02 | 0.3051E-01 | 0.2020E+04 | 0xff0000 |
| 0.4976E+02 | 0.3657E-01 | 0.2020E+04 | 0xff0000 |
| 0.5082E+02 | 0.4243E-01 | 0.2020E+04 | 0xff0000 |
| 0.5187E+02 | 0.4740E-01 | 0.2020E+04 | 0xff0000 |
| 0.5293E+02 | 0.5140E-01 | 0.2020E+04 | 0xff0000 |
| 0.5399E+02 | 0.5378E-01 | 0.2020E+04 | 0xff0000 |
| 0.5504E+02 | 0.5492E-01 | 0.2020E+04 | 0xff0000 |
| 0.5610E+02 | 0.5492E-01 | 0.2020E+04 | 0xff0000 |
| 0.5716E+02 | 0.5368E-01 | 0.2020E+04 | 0xff0000 |
| 0.5821E+02 | 0.5137E-01 | 0.2020E+04 | 0xff0000 |
| 0.5927E+02 | 0.4868E-01 | 0.2020E+04 | 0xff0000 |
| 0.6033E+02 | 0.4483E-01 | 0.2020E+04 | 0xff0000 |
| 0.6139E+02 | 0.4047E-01 | 0.2020E+04 | 0xff0000 |
| 0.6244E+02 | 0.3658E-01 | 0.2020E+04 | 0xff0000 |
| 0.6350E+02 | 0.3252E-01 | 0.2020E+04 | 0xff0000 |
| 0.6456E+02 | 0.2830E-01 | 0.2020E+04 | 0xff0000 |
| 0.6561E+02 | 0.2463E-01 | 0.2020E+04 | 0xff0000 |
| 0.6667E+02 | 0.2153E-01 | 0.2020E+04 | 0xff0000 |
| 0.6773E+02 | 0.1874E-01 | 0.2020E+04 | 0xff0000 |
| 0.6878E+02 | 0.1582E-01 | 0.2020E+04 | 0xff0000 |
| 0.6984E+02 | 0.1324E-01 | 0.2020E+04 | 0xff0000 |
| 0.7090E+02 | 0.1121E-01 | 0.2020E+04 | 0xff0000 |
| 0.7196E+02 | 0.9548E-02 | 0.2020E+04 | 0xff0000 |
| 0.7301E+02 | 0.7870E-02 | 0.2020E+04 | 0xff0000 |
| 0.7407E+02 | 0.6515E-02 | 0.2020E+04 | 0xff0000 |
| 0.7513E+02 | 0.5269E-02 | 0.2020E+04 | 0xff0000 |
| 0.7618E+02 | 0.4222E-02 | 0.2020E+04 | 0xff0000 |
| 0.7724E+02 | 0.3415E-02 | 0.2020E+04 | 0xff0000 |
| 0.7830E+02 | 0.2846E-02 | 0.2020E+04 | 0xff0000 |
| 0.7935E+02 | 0.2361E-02 | 0.2020E+04 | 0xff0000 |
| 0.8041E+02 | 0.1841E-02 | 0.2020E+04 | 0xff0000 |
| 0.8147E+02 | 0.1451E-02 | 0.2020E+04 | 0xff0000 |
| 0.8252E+02 | 0.1258E-02 | 0.2020E+04 | 0xff0000 |

V2\_Results\_baseline\_Irena\_accel.dat

|            |            |            |          |
|------------|------------|------------|----------|
| 0.8358E+02 | 0.1046E-02 | 0.2020E+04 | 0xff0000 |
| 0.8464E+02 | 0.8292E-03 | 0.2020E+04 | 0xff0000 |
| 0.8570E+02 | 0.6500E-03 | 0.2020E+04 | 0xff0000 |
| 0.8675E+02 | 0.5395E-03 | 0.2020E+04 | 0xff0000 |
| 0.8781E+02 | 0.4628E-03 | 0.2020E+04 | 0xff0000 |
| 0.8887E+02 | 0.3807E-03 | 0.2020E+04 | 0xff0000 |
| 0.8992E+02 | 0.3112E-03 | 0.2020E+04 | 0xff0000 |
| 0.9098E+02 | 0.2528E-03 | 0.2020E+04 | 0xff0000 |
| 0.9204E+02 | 0.2141E-03 | 0.2020E+04 | 0xff0000 |
| 0.9309E+02 | 0.1977E-03 | 0.2020E+04 | 0xff0000 |
| 0.9415E+02 | 0.1734E-03 | 0.2020E+04 | 0xff0000 |
| 0.9521E+02 | 0.1281E-03 | 0.2020E+04 | 0xff0000 |
| 0.9627E+02 | 0.8668E-04 | 0.2020E+04 | 0xff0000 |
| 0.9732E+02 | 0.6181E-04 | 0.2020E+04 | 0xff0000 |
| 0.9838E+02 | 0.5355E-04 | 0.2020E+04 | 0xff0000 |
| 0.9944E+02 | 0.4301E-04 | 0.2020E+04 | 0xff0000 |
| 0.1005E+03 | 0.4171E-04 | 0.2020E+04 | 0xff0000 |
| 0.1016E+03 | 0.4164E-04 | 0.2020E+04 | 0xff0000 |
| 0.1026E+03 | 0.4961E-04 | 0.2020E+04 | 0xff0000 |
| 0.1037E+03 | 0.4352E-04 | 0.2020E+04 | 0xff0000 |
| 0.1047E+03 | 0.3533E-04 | 0.2020E+04 | 0xff0000 |
| 0.1058E+03 | 0.1668E-04 | 0.2020E+04 | 0xff0000 |
| 0.1068E+03 | 0.8985E-05 | 0.2020E+04 | 0xff0000 |
| 0.1079E+03 | 0.8412E-05 | 0.2020E+04 | 0xff0000 |
| 0.1089E+03 | 0.1199E-04 | 0.2020E+04 | 0xff0000 |
| 0.1100E+03 | 0.1156E-04 | 0.2020E+04 | 0xff0000 |
| 0.1111E+03 | 0.6428E-05 | 0.2020E+04 | 0xff0000 |
| 0.1121E+03 | 0.1716E-05 | 0.2020E+04 | 0xff0000 |
| 0.1132E+03 | 0.3910E-05 | 0.2020E+04 | 0xff0000 |
| 0.1142E+03 | 0.1136E-04 | 0.2020E+04 | 0xff0000 |
| 0.1153E+03 | 0.1579E-04 | 0.2020E+04 | 0xff0000 |
| 0.1163E+03 | 0.1323E-04 | 0.2020E+04 | 0xff0000 |
| 0.1174E+03 | 0.5560E-05 | 0.2020E+04 | 0xff0000 |
| 0.1185E+03 | 0.6244E-05 | 0.2020E+04 | 0xff0000 |
| 0.1195E+03 | 0.5331E-05 | 0.2020E+04 | 0xff0000 |

V2\_Results\_baseline\_Irena\_accel.dat

|            |            |            |           |
|------------|------------|------------|-----------|
| 0.1146E+00 | 0.5045E-05 | 0.2030E+04 | 0xfffff00 |
| 0.1261E+01 | 0.1381E-05 | 0.2030E+04 | 0xfffff00 |
| 0.2407E+01 | 0.0000E+00 | 0.2030E+04 | 0xfffff00 |
| 0.3553E+01 | 0.0000E+00 | 0.2030E+04 | 0xfffff00 |
| 0.4699E+01 | 0.0000E+00 | 0.2030E+04 | 0xfffff00 |
| 0.5845E+01 | 0.0000E+00 | 0.2030E+04 | 0xfffff00 |
| 0.6991E+01 | 0.0000E+00 | 0.2030E+04 | 0xfffff00 |
| 0.8137E+01 | 0.0000E+00 | 0.2030E+04 | 0xfffff00 |
| 0.9283E+01 | 0.0000E+00 | 0.2030E+04 | 0xfffff00 |
| 0.1043E+02 | 0.0000E+00 | 0.2030E+04 | 0xfffff00 |
| 0.1157E+02 | 0.0000E+00 | 0.2030E+04 | 0xfffff00 |
| 0.1272E+02 | 0.0000E+00 | 0.2030E+04 | 0xfffff00 |
| 0.1387E+02 | 0.0000E+00 | 0.2030E+04 | 0xfffff00 |
| 0.1501E+02 | 0.0000E+00 | 0.2030E+04 | 0xfffff00 |
| 0.1616E+02 | 0.0000E+00 | 0.2030E+04 | 0xfffff00 |
| 0.1731E+02 | 0.0000E+00 | 0.2030E+04 | 0xfffff00 |
| 0.1845E+02 | 0.0000E+00 | 0.2030E+04 | 0xfffff00 |
| 0.1960E+02 | 0.0000E+00 | 0.2030E+04 | 0xfffff00 |
| 0.2074E+02 | 0.0000E+00 | 0.2030E+04 | 0xfffff00 |
| 0.2189E+02 | 0.0000E+00 | 0.2030E+04 | 0xfffff00 |
| 0.2304E+02 | 0.0000E+00 | 0.2030E+04 | 0xfffff00 |
| 0.2418E+02 | 0.0000E+00 | 0.2030E+04 | 0xfffff00 |
| 0.2533E+02 | 0.7200E-06 | 0.2030E+04 | 0xfffff00 |
| 0.2647E+02 | 0.9667E-05 | 0.2030E+04 | 0xfffff00 |
| 0.2762E+02 | 0.4189E-04 | 0.2030E+04 | 0xfffff00 |
| 0.2877E+02 | 0.2182E-03 | 0.2030E+04 | 0xfffff00 |
| 0.2991E+02 | 0.6858E-03 | 0.2030E+04 | 0xfffff00 |
| 0.3106E+02 | 0.1894E-02 | 0.2030E+04 | 0xfffff00 |
| 0.3220E+02 | 0.4249E-02 | 0.2030E+04 | 0xfffff00 |
| 0.3335E+02 | 0.8409E-02 | 0.2030E+04 | 0xfffff00 |
| 0.3450E+02 | 0.1505E-01 | 0.2030E+04 | 0xfffff00 |
| 0.3564E+02 | 0.2339E-01 | 0.2030E+04 | 0xfffff00 |
| 0.3679E+02 | 0.3275E-01 | 0.2030E+04 | 0xfffff00 |
| 0.3793E+02 | 0.4323E-01 | 0.2030E+04 | 0xfffff00 |
| 0.3908E+02 | 0.5291E-01 | 0.2030E+04 | 0xfffff00 |
| 0.4023E+02 | 0.6038E-01 | 0.2030E+04 | 0xfffff00 |

V2\_Results\_baseline\_Irena\_accel.dat

|            |            |            |           |
|------------|------------|------------|-----------|
| 0.4137E+02 | 0.6574E-01 | 0.2030E+04 | 0xfffff00 |
| 0.4252E+02 | 0.6865E-01 | 0.2030E+04 | 0xfffff00 |
| 0.4366E+02 | 0.6760E-01 | 0.2030E+04 | 0xfffff00 |
| 0.4481E+02 | 0.6396E-01 | 0.2030E+04 | 0xfffff00 |
| 0.4596E+02 | 0.5951E-01 | 0.2030E+04 | 0xfffff00 |
| 0.4710E+02 | 0.5305E-01 | 0.2030E+04 | 0xfffff00 |
| 0.4825E+02 | 0.4638E-01 | 0.2030E+04 | 0xfffff00 |
| 0.4939E+02 | 0.4029E-01 | 0.2030E+04 | 0xfffff00 |
| 0.5054E+02 | 0.3461E-01 | 0.2030E+04 | 0xfffff00 |
| 0.5169E+02 | 0.2832E-01 | 0.2030E+04 | 0xfffff00 |
| 0.5283E+02 | 0.2213E-01 | 0.2030E+04 | 0xfffff00 |
| 0.5398E+02 | 0.1787E-01 | 0.2030E+04 | 0xfffff00 |
| 0.5512E+02 | 0.1441E-01 | 0.2030E+04 | 0xfffff00 |
| 0.5627E+02 | 0.1137E-01 | 0.2030E+04 | 0xfffff00 |
| 0.5742E+02 | 0.8647E-02 | 0.2030E+04 | 0xfffff00 |
| 0.5856E+02 | 0.6392E-02 | 0.2030E+04 | 0xfffff00 |
| 0.5971E+02 | 0.4947E-02 | 0.2030E+04 | 0xfffff00 |
| 0.6085E+02 | 0.3775E-02 | 0.2030E+04 | 0xfffff00 |
| 0.6200E+02 | 0.2893E-02 | 0.2030E+04 | 0xfffff00 |
| 0.6315E+02 | 0.2217E-02 | 0.2030E+04 | 0xfffff00 |
| 0.6429E+02 | 0.1633E-02 | 0.2030E+04 | 0xfffff00 |
| 0.6544E+02 | 0.1247E-02 | 0.2030E+04 | 0xfffff00 |
| 0.6658E+02 | 0.9072E-03 | 0.2030E+04 | 0xfffff00 |
| 0.6773E+02 | 0.6591E-03 | 0.2030E+04 | 0xfffff00 |
| 0.6888E+02 | 0.5173E-03 | 0.2030E+04 | 0xfffff00 |
| 0.7002E+02 | 0.3999E-03 | 0.2030E+04 | 0xfffff00 |
| 0.7117E+02 | 0.3233E-03 | 0.2030E+04 | 0xfffff00 |
| 0.7232E+02 | 0.2316E-03 | 0.2030E+04 | 0xfffff00 |
| 0.7346E+02 | 0.1646E-03 | 0.2030E+04 | 0xfffff00 |
| 0.7461E+02 | 0.9365E-04 | 0.2030E+04 | 0xfffff00 |
| 0.7575E+02 | 0.7798E-04 | 0.2030E+04 | 0xfffff00 |
| 0.7690E+02 | 0.8294E-04 | 0.2030E+04 | 0xfffff00 |
| 0.7805E+02 | 0.5605E-04 | 0.2030E+04 | 0xfffff00 |
| 0.7919E+02 | 0.2664E-04 | 0.2030E+04 | 0xfffff00 |
| 0.8034E+02 | 0.1357E-04 | 0.2030E+04 | 0xfffff00 |
| 0.8148E+02 | 0.1435E-04 | 0.2030E+04 | 0xfffff00 |

V2\_Results\_baseline\_Irena\_accel.dat

|            |            |            |           |
|------------|------------|------------|-----------|
| 0.8263E+02 | 0.1993E-04 | 0.2030E+04 | 0xfffff00 |
| 0.8378E+02 | 0.2489E-04 | 0.2030E+04 | 0xfffff00 |
| 0.8492E+02 | 0.1795E-04 | 0.2030E+04 | 0xfffff00 |
| 0.8607E+02 | 0.2407E-05 | 0.2030E+04 | 0xfffff00 |
| 0.8721E+02 | 0.0000E+00 | 0.2030E+04 | 0xfffff00 |
| 0.8836E+02 | 0.1182E-05 | 0.2030E+04 | 0xfffff00 |
| 0.8951E+02 | 0.5025E-05 | 0.2030E+04 | 0xfffff00 |
| 0.9065E+02 | 0.4142E-05 | 0.2030E+04 | 0xfffff00 |
| 0.9180E+02 | 0.5045E-05 | 0.2030E+04 | 0xfffff00 |
|            |            |            |           |
| 0.5674E+02 | 0.1340E-04 | 0.2040E+04 | 0x00ffff  |
| 0.5768E+02 | 0.2466E-04 | 0.2040E+04 | 0x00ffff  |
| 0.5863E+02 | 0.5116E-04 | 0.2040E+04 | 0x00ffff  |
| 0.5958E+02 | 0.1461E-03 | 0.2040E+04 | 0x00ffff  |
| 0.6052E+02 | 0.3317E-03 | 0.2040E+04 | 0x00ffff  |
| 0.6147E+02 | 0.6659E-03 | 0.2040E+04 | 0x00ffff  |
| 0.6242E+02 | 0.1278E-02 | 0.2040E+04 | 0x00ffff  |
| 0.6336E+02 | 0.2291E-02 | 0.2040E+04 | 0x00ffff  |
| 0.6431E+02 | 0.3902E-02 | 0.2040E+04 | 0x00ffff  |
| 0.6526E+02 | 0.6277E-02 | 0.2040E+04 | 0x00ffff  |
| 0.6620E+02 | 0.9391E-02 | 0.2040E+04 | 0x00ffff  |
| 0.6715E+02 | 0.1321E-01 | 0.2040E+04 | 0x00ffff  |
| 0.6810E+02 | 0.1789E-01 | 0.2040E+04 | 0x00ffff  |
| 0.6904E+02 | 0.2338E-01 | 0.2040E+04 | 0x00ffff  |
| 0.6999E+02 | 0.2912E-01 | 0.2040E+04 | 0x00ffff  |
| 0.7093E+02 | 0.3497E-01 | 0.2040E+04 | 0x00ffff  |
| 0.7188E+02 | 0.4045E-01 | 0.2040E+04 | 0x00ffff  |
| 0.7283E+02 | 0.4531E-01 | 0.2040E+04 | 0x00ffff  |
| 0.7377E+02 | 0.4929E-01 | 0.2040E+04 | 0x00ffff  |
| 0.7472E+02 | 0.5304E-01 | 0.2040E+04 | 0x00ffff  |
| 0.7567E+02 | 0.5568E-01 | 0.2040E+04 | 0x00ffff  |
| 0.7661E+02 | 0.5689E-01 | 0.2040E+04 | 0x00ffff  |
| 0.7756E+02 | 0.5628E-01 | 0.2040E+04 | 0x00ffff  |
| 0.7851E+02 | 0.5464E-01 | 0.2040E+04 | 0x00ffff  |
| 0.7945E+02 | 0.5279E-01 | 0.2040E+04 | 0x00ffff  |
| 0.8040E+02 | 0.5061E-01 | 0.2040E+04 | 0x00ffff  |

V2\_Results\_baseline\_Irena\_accel.dat

|            |            |            |          |
|------------|------------|------------|----------|
| 0.8135E+02 | 0.4780E-01 | 0.2040E+04 | 0x00ffff |
| 0.8229E+02 | 0.4414E-01 | 0.2040E+04 | 0x00ffff |
| 0.8324E+02 | 0.4025E-01 | 0.2040E+04 | 0x00ffff |
| 0.8419E+02 | 0.3635E-01 | 0.2040E+04 | 0x00ffff |
| 0.8513E+02 | 0.3270E-01 | 0.2040E+04 | 0x00ffff |
| 0.8608E+02 | 0.2938E-01 | 0.2040E+04 | 0x00ffff |
| 0.8703E+02 | 0.2585E-01 | 0.2040E+04 | 0x00ffff |
| 0.8797E+02 | 0.2238E-01 | 0.2040E+04 | 0x00ffff |
| 0.8892E+02 | 0.1925E-01 | 0.2040E+04 | 0x00ffff |
| 0.8987E+02 | 0.1664E-01 | 0.2040E+04 | 0x00ffff |
| 0.9081E+02 | 0.1408E-01 | 0.2040E+04 | 0x00ffff |
| 0.9176E+02 | 0.1213E-01 | 0.2040E+04 | 0x00ffff |
| 0.9271E+02 | 0.1038E-01 | 0.2040E+04 | 0x00ffff |
| 0.9365E+02 | 0.8666E-02 | 0.2040E+04 | 0x00ffff |
| 0.9460E+02 | 0.7100E-02 | 0.2040E+04 | 0x00ffff |
| 0.9555E+02 | 0.5877E-02 | 0.2040E+04 | 0x00ffff |
| 0.9649E+02 | 0.4781E-02 | 0.2040E+04 | 0x00ffff |
| 0.9744E+02 | 0.3840E-02 | 0.2040E+04 | 0x00ffff |
| 0.9839E+02 | 0.3171E-02 | 0.2040E+04 | 0x00ffff |
| 0.9933E+02 | 0.2677E-02 | 0.2040E+04 | 0x00ffff |
| 0.1003E+03 | 0.2253E-02 | 0.2040E+04 | 0x00ffff |
| 0.1012E+03 | 0.1801E-02 | 0.2040E+04 | 0x00ffff |
| 0.1022E+03 | 0.1435E-02 | 0.2040E+04 | 0x00ffff |
| 0.1031E+03 | 0.1166E-02 | 0.2040E+04 | 0x00ffff |
| 0.1041E+03 | 0.9170E-03 | 0.2040E+04 | 0x00ffff |
| 0.1050E+03 | 0.6982E-03 | 0.2040E+04 | 0x00ffff |
| 0.1060E+03 | 0.5393E-03 | 0.2040E+04 | 0x00ffff |
| 0.1069E+03 | 0.4409E-03 | 0.2040E+04 | 0x00ffff |
| 0.1079E+03 | 0.3538E-03 | 0.2040E+04 | 0x00ffff |
| 0.1088E+03 | 0.2947E-03 | 0.2040E+04 | 0x00ffff |
| 0.1097E+03 | 0.2409E-03 | 0.2040E+04 | 0x00ffff |
| 0.1107E+03 | 0.2093E-03 | 0.2040E+04 | 0x00ffff |
| 0.1116E+03 | 0.1627E-03 | 0.2040E+04 | 0x00ffff |
| 0.1126E+03 | 0.1098E-03 | 0.2040E+04 | 0x00ffff |
| 0.1135E+03 | 0.8107E-04 | 0.2040E+04 | 0x00ffff |
| 0.1145E+03 | 0.8630E-04 | 0.2040E+04 | 0x00ffff |

V2\_Results\_baseline\_Irena\_accel.dat

|            |            |            |          |
|------------|------------|------------|----------|
| 0.1154E+03 | 0.9470E-04 | 0.2040E+04 | 0x00ffff |
| 0.1164E+03 | 0.7516E-04 | 0.2040E+04 | 0x00ffff |
| 0.1173E+03 | 0.4153E-04 | 0.2040E+04 | 0x00ffff |
| 0.1183E+03 | 0.3070E-04 | 0.2040E+04 | 0x00ffff |
| 0.1192E+03 | 0.2888E-04 | 0.2040E+04 | 0x00ffff |
| 0.1202E+03 | 0.2021E-04 | 0.2040E+04 | 0x00ffff |
| 0.1211E+03 | 0.1124E-04 | 0.2040E+04 | 0x00ffff |
| 0.1221E+03 | 0.1091E-04 | 0.2040E+04 | 0x00ffff |
| 0.1230E+03 | 0.9177E-05 | 0.2040E+04 | 0x00ffff |
| 0.1239E+03 | 0.1029E-04 | 0.2040E+04 | 0x00ffff |
| 0.1249E+03 | 0.1116E-04 | 0.2040E+04 | 0x00ffff |
| 0.1258E+03 | 0.8835E-05 | 0.2040E+04 | 0x00ffff |
| 0.1268E+03 | 0.3214E-05 | 0.2040E+04 | 0x00ffff |
| 0.1277E+03 | 0.0000E+00 | 0.2040E+04 | 0x00ffff |
| 0.1287E+03 | 0.0000E+00 | 0.2040E+04 | 0x00ffff |
| 0.1296E+03 | 0.0000E+00 | 0.2040E+04 | 0x00ffff |
| 0.1306E+03 | 0.0000E+00 | 0.2040E+04 | 0x00ffff |
| 0.1315E+03 | 0.2770E-05 | 0.2040E+04 | 0x00ffff |
| 0.1325E+03 | 0.4251E-05 | 0.2040E+04 | 0x00ffff |
|            |            |            |          |
| 0.2109E+02 | 0.2677E-04 | 0.2050E+04 | 0x0000ff |
| 0.2193E+02 | 0.8370E-04 | 0.2050E+04 | 0x0000ff |
| 0.2278E+02 | 0.2015E-03 | 0.2050E+04 | 0x0000ff |
| 0.2363E+02 | 0.4488E-03 | 0.2050E+04 | 0x0000ff |
| 0.2448E+02 | 0.9305E-03 | 0.2050E+04 | 0x0000ff |
| 0.2532E+02 | 0.1825E-02 | 0.2050E+04 | 0x0000ff |
| 0.2617E+02 | 0.3570E-02 | 0.2050E+04 | 0x0000ff |
| 0.2702E+02 | 0.6289E-02 | 0.2050E+04 | 0x0000ff |
| 0.2786E+02 | 0.9949E-02 | 0.2050E+04 | 0x0000ff |
| 0.2871E+02 | 0.1503E-01 | 0.2050E+04 | 0x0000ff |
| 0.2956E+02 | 0.2126E-01 | 0.2050E+04 | 0x0000ff |
| 0.3041E+02 | 0.2833E-01 | 0.2050E+04 | 0x0000ff |
| 0.3125E+02 | 0.3598E-01 | 0.2050E+04 | 0x0000ff |
| 0.3210E+02 | 0.4366E-01 | 0.2050E+04 | 0x0000ff |
| 0.3295E+02 | 0.5075E-01 | 0.2050E+04 | 0x0000ff |
| 0.3380E+02 | 0.5703E-01 | 0.2050E+04 | 0x0000ff |

V2\_Results\_baseline\_Irena\_accel.dat

|            |            |            |          |
|------------|------------|------------|----------|
| 0.3464E+02 | 0.6194E-01 | 0.2050E+04 | 0x0000ff |
| 0.3549E+02 | 0.6483E-01 | 0.2050E+04 | 0x0000ff |
| 0.3634E+02 | 0.6680E-01 | 0.2050E+04 | 0x0000ff |
| 0.3718E+02 | 0.6784E-01 | 0.2050E+04 | 0x0000ff |
| 0.3803E+02 | 0.6732E-01 | 0.2050E+04 | 0x0000ff |
| 0.3888E+02 | 0.6524E-01 | 0.2050E+04 | 0x0000ff |
| 0.3973E+02 | 0.6221E-01 | 0.2050E+04 | 0x0000ff |
| 0.4057E+02 | 0.5767E-01 | 0.2050E+04 | 0x0000ff |
| 0.4142E+02 | 0.5266E-01 | 0.2050E+04 | 0x0000ff |
| 0.4227E+02 | 0.4750E-01 | 0.2050E+04 | 0x0000ff |
| 0.4312E+02 | 0.4288E-01 | 0.2050E+04 | 0x0000ff |
| 0.4396E+02 | 0.3782E-01 | 0.2050E+04 | 0x0000ff |
| 0.4481E+02 | 0.3292E-01 | 0.2050E+04 | 0x0000ff |
| 0.4566E+02 | 0.2892E-01 | 0.2050E+04 | 0x0000ff |
| 0.4651E+02 | 0.2489E-01 | 0.2050E+04 | 0x0000ff |
| 0.4735E+02 | 0.2106E-01 | 0.2050E+04 | 0x0000ff |
| 0.4820E+02 | 0.1780E-01 | 0.2050E+04 | 0x0000ff |
| 0.4905E+02 | 0.1492E-01 | 0.2050E+04 | 0x0000ff |
| 0.4989E+02 | 0.1261E-01 | 0.2050E+04 | 0x0000ff |
| 0.5074E+02 | 0.1058E-01 | 0.2050E+04 | 0x0000ff |
| 0.5159E+02 | 0.8622E-02 | 0.2050E+04 | 0x0000ff |
| 0.5244E+02 | 0.6757E-02 | 0.2050E+04 | 0x0000ff |
| 0.5328E+02 | 0.5612E-02 | 0.2050E+04 | 0x0000ff |
| 0.5413E+02 | 0.4801E-02 | 0.2050E+04 | 0x0000ff |
| 0.5498E+02 | 0.3971E-02 | 0.2050E+04 | 0x0000ff |
| 0.5583E+02 | 0.3143E-02 | 0.2050E+04 | 0x0000ff |
| 0.5667E+02 | 0.2466E-02 | 0.2050E+04 | 0x0000ff |
| 0.5752E+02 | 0.2001E-02 | 0.2050E+04 | 0x0000ff |
| 0.5837E+02 | 0.1699E-02 | 0.2050E+04 | 0x0000ff |
| 0.5921E+02 | 0.1411E-02 | 0.2050E+04 | 0x0000ff |
| 0.6006E+02 | 0.1070E-02 | 0.2050E+04 | 0x0000ff |
| 0.6091E+02 | 0.9037E-03 | 0.2050E+04 | 0x0000ff |
| 0.6176E+02 | 0.7758E-03 | 0.2050E+04 | 0x0000ff |
| 0.6260E+02 | 0.5932E-03 | 0.2050E+04 | 0x0000ff |
| 0.6345E+02 | 0.4358E-03 | 0.2050E+04 | 0x0000ff |
| 0.6430E+02 | 0.3753E-03 | 0.2050E+04 | 0x0000ff |

V2\_Results\_baseline\_Irena\_accel.dat

|            |            |            |          |
|------------|------------|------------|----------|
| 0.6515E+02 | 0.3320E-03 | 0.2050E+04 | 0x0000ff |
| 0.6599E+02 | 0.2610E-03 | 0.2050E+04 | 0x0000ff |
| 0.6684E+02 | 0.1884E-03 | 0.2050E+04 | 0x0000ff |
| 0.6769E+02 | 0.1729E-03 | 0.2050E+04 | 0x0000ff |
| 0.6853E+02 | 0.1643E-03 | 0.2050E+04 | 0x0000ff |
| 0.6938E+02 | 0.1236E-03 | 0.2050E+04 | 0x0000ff |
| 0.7023E+02 | 0.9173E-04 | 0.2050E+04 | 0x0000ff |
| 0.7108E+02 | 0.5988E-04 | 0.2050E+04 | 0x0000ff |
| 0.7192E+02 | 0.4484E-04 | 0.2050E+04 | 0x0000ff |
| 0.7277E+02 | 0.4775E-04 | 0.2050E+04 | 0x0000ff |
| 0.7362E+02 | 0.4392E-04 | 0.2050E+04 | 0x0000ff |
| 0.7447E+02 | 0.4517E-04 | 0.2050E+04 | 0x0000ff |
| 0.7531E+02 | 0.4429E-04 | 0.2050E+04 | 0x0000ff |
| 0.7616E+02 | 0.4091E-04 | 0.2050E+04 | 0x0000ff |
| 0.7701E+02 | 0.2396E-04 | 0.2050E+04 | 0x0000ff |
| 0.7785E+02 | 0.1449E-04 | 0.2050E+04 | 0x0000ff |
| 0.7870E+02 | 0.9941E-05 | 0.2050E+04 | 0x0000ff |
| 0.7955E+02 | 0.5428E-05 | 0.2050E+04 | 0x0000ff |
| 0.8040E+02 | 0.0000E+00 | 0.2050E+04 | 0x0000ff |
| 0.8124E+02 | 0.3842E-05 | 0.2050E+04 | 0x0000ff |
| 0.8209E+02 | 0.1318E-04 | 0.2050E+04 | 0x0000ff |
| 0.8294E+02 | 0.2393E-04 | 0.2050E+04 | 0x0000ff |
| 0.8379E+02 | 0.2420E-04 | 0.2050E+04 | 0x0000ff |
| 0.8463E+02 | 0.1341E-04 | 0.2050E+04 | 0x0000ff |
| 0.8548E+02 | 0.4249E-05 | 0.2050E+04 | 0x0000ff |
| 0.8633E+02 | 0.2989E-05 | 0.2050E+04 | 0x0000ff |
| 0.8717E+02 | 0.5042E-05 | 0.2050E+04 | 0x0000ff |
| 0.8802E+02 | 0.6836E-05 | 0.2050E+04 | 0x0000ff |
| 0.8887E+02 | 0.5049E-05 | 0.2050E+04 | 0x0000ff |

#       \*\*\*\*\*       Standardised       \*\*\*\*\*

|            |             |            |             |            |             |            |             |
|------------|-------------|------------|-------------|------------|-------------|------------|-------------|
| -200       | -0.2938E+01 | 0.1228E-03 | -0.2884E+01 | 0.7391E-04 | -0.3037E+01 | 0.9947E-04 | -0.2858E+01 |
| 0.1673E-03 |             |            |             |            |             |            |             |
| -195       | -0.2802E+01 | 0.3007E-03 | -0.2754E+01 | 0.2496E-03 | -0.2910E+01 | 0.1830E-03 | -0.2722E+01 |
| 0.5229E-03 |             |            |             |            |             |            |             |

V2\_Results\_baseline\_Irena\_accel.dat

|            |             |            |             |            |             |            |             |
|------------|-------------|------------|-------------|------------|-------------|------------|-------------|
| -190       | -0.2667E+01 | 0.6043E-03 | -0.2623E+01 | 0.8527E-03 | -0.2782E+01 | 0.3798E-03 | -0.2587E+01 |
| 0.1259E-02 |             |            |             |            |             |            |             |
| -185       | -0.2531E+01 | 0.1551E-02 | -0.2493E+01 | 0.2214E-02 | -0.2655E+01 | 0.1084E-02 | -0.2451E+01 |
| 0.2803E-02 |             |            |             |            |             |            |             |
| -180       | -0.2396E+01 | 0.3798E-02 | -0.2363E+01 | 0.4726E-02 | -0.2527E+01 | 0.2462E-02 | -0.2315E+01 |
| 0.5813E-02 |             |            |             |            |             |            |             |
| -175       | -0.2261E+01 | 0.8036E-02 | -0.2232E+01 | 0.9759E-02 | -0.2399E+01 | 0.4943E-02 | -0.2180E+01 |
| 0.1140E-01 |             |            |             |            |             |            |             |
| -170       | -0.2125E+01 | 0.1516E-01 | -0.2102E+01 | 0.1841E-01 | -0.2272E+01 | 0.9483E-02 | -0.2044E+01 |
| 0.2230E-01 |             |            |             |            |             |            |             |
| -165       | -0.1990E+01 | 0.2708E-01 | -0.1971E+01 | 0.3146E-01 | -0.2144E+01 | 0.1701E-01 | -0.1908E+01 |
| 0.3929E-01 |             |            |             |            |             |            |             |
| -160       | -0.1854E+01 | 0.4760E-01 | -0.1841E+01 | 0.5061E-01 | -0.2017E+01 | 0.2896E-01 | -0.1773E+01 |
| 0.6215E-01 |             |            |             |            |             |            |             |
| -155       | -0.1719E+01 | 0.7488E-01 | -0.1711E+01 | 0.7748E-01 | -0.1889E+01 | 0.4659E-01 | -0.1637E+01 |
| 0.9390E-01 |             |            |             |            |             |            |             |
| -150       | -0.1584E+01 | 0.1083E+00 | -0.1580E+01 | 0.1118E+00 | -0.1762E+01 | 0.6971E-01 | -0.1501E+01 |
| 0.1328E+00 |             |            |             |            |             |            |             |
| -145       | -0.1448E+01 | 0.1473E+00 | -0.1450E+01 | 0.1498E+00 | -0.1634E+01 | 0.9809E-01 | -0.1366E+01 |
| 0.1770E+00 |             |            |             |            |             |            |             |
| -140       | -0.1313E+01 | 0.1911E+00 | -0.1319E+01 | 0.1910E+00 | -0.1507E+01 | 0.1328E+00 | -0.1230E+01 |
| 0.2248E+00 |             |            |             |            |             |            |             |
| -135       | -0.1178E+01 | 0.2382E+00 | -0.1189E+01 | 0.2357E+00 | -0.1379E+01 | 0.1735E+00 | -0.1095E+01 |
| 0.2727E+00 |             |            |             |            |             |            |             |
| -130       | -0.1042E+01 | 0.2855E+00 | -0.1059E+01 | 0.2828E+00 | -0.1252E+01 | 0.2161E+00 | -0.9590E+00 |
| 0.3170E+00 |             |            |             |            |             |            |             |
| -125       | -0.9067E+00 | 0.3313E+00 | -0.9281E+00 | 0.3247E+00 | -0.1124E+01 | 0.2595E+00 | -0.8233E+00 |
| 0.3563E+00 |             |            |             |            |             |            |             |
| -120       | -0.7714E+00 | 0.3700E+00 | -0.7977E+00 | 0.3604E+00 | -0.9967E+00 | 0.3003E+00 | -0.6877E+00 |
| 0.3869E+00 |             |            |             |            |             |            |             |
| -115       | -0.6360E+00 | 0.4013E+00 | -0.6673E+00 | 0.3887E+00 | -0.8692E+00 | 0.3363E+00 | -0.5521E+00 |
| 0.4050E+00 |             |            |             |            |             |            |             |
| -110       | -0.5006E+00 | 0.4199E+00 | -0.5369E+00 | 0.4108E+00 | -0.7416E+00 | 0.3659E+00 | -0.4164E+00 |
| 0.4173E+00 |             |            |             |            |             |            |             |
| -105       | -0.3652E+00 | 0.4288E+00 | -0.4065E+00 | 0.4255E+00 | -0.6141E+00 | 0.3937E+00 | -0.2808E+00 |
| 0.4238E+00 |             |            |             |            |             |            |             |

V2\_Results\_baseline\_Irena\_accel.dat

|            |             |            |             |            |             |            |             |
|------------|-------------|------------|-------------|------------|-------------|------------|-------------|
| -100       | -0.2298E+00 | 0.4287E+00 | -0.2761E+00 | 0.4284E+00 | -0.4866E+00 | 0.4133E+00 | -0.1452E+00 |
| 0.4205E+00 |             |            |             |            |             |            |             |
| -95        | -0.9443E-01 | 0.4191E+00 | -0.1457E+00 | 0.4185E+00 | -0.3591E+00 | 0.4223E+00 | -0.9541E-02 |
| 0.4076E+00 |             |            |             |            |             |            |             |
| -90        | 0.4096E-01  | 0.4011E+00 | -0.1529E-01 | 0.4019E+00 | -0.2315E+00 | 0.4178E+00 | 0.1261E+00  |
| 0.3886E+00 |             |            |             |            |             |            |             |
| -85        | 0.1763E+00  | 0.3800E+00 | 0.1151E+00  | 0.3839E+00 | -0.1040E+00 | 0.4056E+00 | 0.2617E+00  |
| 0.3603E+00 |             |            |             |            |             |            |             |
| -80        | 0.3117E+00  | 0.3500E+00 | 0.2455E+00  | 0.3597E+00 | 0.2353E-01  | 0.3918E+00 | 0.3974E+00  |
| 0.3290E+00 |             |            |             |            |             |            |             |
| -75        | 0.4471E+00  | 0.3159E+00 | 0.3759E+00  | 0.3306E+00 | 0.1511E+00  | 0.3756E+00 | 0.5330E+00  |
| 0.2968E+00 |             |            |             |            |             |            |             |
| -70        | 0.5825E+00  | 0.2856E+00 | 0.5063E+00  | 0.3010E+00 | 0.2786E+00  | 0.3548E+00 | 0.6686E+00  |
| 0.2679E+00 |             |            |             |            |             |            |             |
| -65        | 0.7179E+00  | 0.2539E+00 | 0.6367E+00  | 0.2731E+00 | 0.4061E+00  | 0.3277E+00 | 0.8042E+00  |
| 0.2363E+00 |             |            |             |            |             |            |             |
| -60        | 0.8533E+00  | 0.2210E+00 | 0.7672E+00  | 0.2463E+00 | 0.5336E+00  | 0.2987E+00 | 0.9399E+00  |
| 0.2057E+00 |             |            |             |            |             |            |             |
| -55        | 0.9887E+00  | 0.1923E+00 | 0.8976E+00  | 0.2214E+00 | 0.6612E+00  | 0.2698E+00 | 0.1076E+01  |
| 0.1807E+00 |             |            |             |            |             |            |             |
| -50        | 0.1124E+01  | 0.1681E+00 | 0.1028E+01  | 0.1947E+00 | 0.7887E+00  | 0.2427E+00 | 0.1211E+01  |
| 0.1555E+00 |             |            |             |            |             |            |             |
| -45        | 0.1259E+01  | 0.1463E+00 | 0.1158E+01  | 0.1659E+00 | 0.9162E+00  | 0.2181E+00 | 0.1347E+01  |
| 0.1316E+00 |             |            |             |            |             |            |             |
| -40        | 0.1395E+01  | 0.1235E+00 | 0.1289E+01  | 0.1389E+00 | 0.1044E+01  | 0.1918E+00 | 0.1482E+01  |
| 0.1112E+00 |             |            |             |            |             |            |             |
| -35        | 0.1530E+01  | 0.1034E+00 | 0.1419E+01  | 0.1195E+00 | 0.1171E+01  | 0.1661E+00 | 0.1618E+01  |
| 0.9322E-01 |             |            |             |            |             |            |             |
| -30        | 0.1666E+01  | 0.8754E-01 | 0.1550E+01  | 0.1030E+00 | 0.1299E+01  | 0.1429E+00 | 0.1754E+01  |
| 0.7878E-01 |             |            |             |            |             |            |             |
| -25        | 0.1801E+01  | 0.7454E-01 | 0.1680E+01  | 0.8763E-01 | 0.1426E+01  | 0.1235E+00 | 0.1889E+01  |
| 0.6607E-01 |             |            |             |            |             |            |             |
| -20        | 0.1936E+01  | 0.6145E-01 | 0.1810E+01  | 0.7395E-01 | 0.1554E+01  | 0.1045E+00 | 0.2025E+01  |
| 0.5386E-01 |             |            |             |            |             |            |             |
| -15        | 0.2072E+01  | 0.5087E-01 | 0.1941E+01  | 0.6198E-01 | 0.1681E+01  | 0.9003E-01 | 0.2161E+01  |
| 0.4221E-01 |             |            |             |            |             |            |             |

V2\_Results\_baseline\_Irena\_accel.dat

|            |            |            |            |            |            |            |            |
|------------|------------|------------|------------|------------|------------|------------|------------|
| -10        | 0.2207E+01 | 0.4113E-01 | 0.2071E+01 | 0.5040E-01 | 0.1809E+01 | 0.7706E-01 | 0.2296E+01 |
| 0.3506E-01 |            |            |            |            |            |            |            |
| -5         | 0.2343E+01 | 0.3296E-01 | 0.2202E+01 | 0.4053E-01 | 0.1936E+01 | 0.6432E-01 | 0.2432E+01 |
| 0.2999E-01 |            |            |            |            |            |            |            |
| 0          | 0.2478E+01 | 0.2666E-01 | 0.2332E+01 | 0.3369E-01 | 0.2064E+01 | 0.5270E-01 | 0.2567E+01 |
| 0.2481E-01 |            |            |            |            |            |            |            |
| 5          | 0.2613E+01 | 0.2222E-01 | 0.2462E+01 | 0.2814E-01 | 0.2192E+01 | 0.4362E-01 | 0.2703E+01 |
| 0.1964E-01 |            |            |            |            |            |            |            |
| 10         | 0.2749E+01 | 0.1843E-01 | 0.2593E+01 | 0.2309E-01 | 0.2319E+01 | 0.3549E-01 | 0.2839E+01 |
| 0.1541E-01 |            |            |            |            |            |            |            |
| 15         | 0.2884E+01 | 0.1438E-01 | 0.2723E+01 | 0.1913E-01 | 0.2447E+01 | 0.2850E-01 | 0.2974E+01 |
| 0.1250E-01 |            |            |            |            |            |            |            |
| 20         | 0.3019E+01 | 0.1133E-01 | 0.2854E+01 | 0.1588E-01 | 0.2574E+01 | 0.2354E-01 | 0.3110E+01 |
| 0.1062E-01 |            |            |            |            |            |            |            |
| 25         | 0.3155E+01 | 0.9823E-02 | 0.2984E+01 | 0.1308E-01 | 0.2702E+01 | 0.1987E-01 | 0.3246E+01 |
| 0.8813E-02 |            |            |            |            |            |            |            |
| 30         | 0.3290E+01 | 0.8168E-02 | 0.3114E+01 | 0.1045E-01 | 0.2829E+01 | 0.1672E-01 | 0.3381E+01 |
| 0.6682E-02 |            |            |            |            |            |            |            |
| 35         | 0.3426E+01 | 0.6474E-02 | 0.3245E+01 | 0.8638E-02 | 0.2957E+01 | 0.1337E-01 | 0.3517E+01 |
| 0.5645E-02 |            |            |            |            |            |            |            |
| 40         | 0.3561E+01 | 0.5075E-02 | 0.3375E+01 | 0.7136E-02 | 0.3084E+01 | 0.1065E-01 | 0.3652E+01 |
| 0.4846E-02 |            |            |            |            |            |            |            |
| 45         | 0.3696E+01 | 0.4212E-02 | 0.3506E+01 | 0.5589E-02 | 0.3212E+01 | 0.8653E-02 | 0.3788E+01 |
| 0.3706E-02 |            |            |            |            |            |            |            |
| 50         | 0.3832E+01 | 0.3613E-02 | 0.3636E+01 | 0.4385E-02 | 0.3339E+01 | 0.6807E-02 | 0.3924E+01 |
| 0.2723E-02 |            |            |            |            |            |            |            |
| 55         | 0.3967E+01 | 0.2972E-02 | 0.3766E+01 | 0.3695E-02 | 0.3467E+01 | 0.5182E-02 | 0.4059E+01 |
| 0.2344E-02 |            |            |            |            |            |            |            |
| 60         | 0.4103E+01 | 0.2430E-02 | 0.3897E+01 | 0.3100E-02 | 0.3594E+01 | 0.4003E-02 | 0.4195E+01 |
| 0.2074E-02 |            |            |            |            |            |            |            |
| 65         | 0.4238E+01 | 0.1974E-02 | 0.4027E+01 | 0.2582E-02 | 0.3722E+01 | 0.3272E-02 | 0.4331E+01 |
| 0.1631E-02 |            |            |            |            |            |            |            |
| 70         | 0.4373E+01 | 0.1671E-02 | 0.4158E+01 | 0.2198E-02 | 0.3849E+01 | 0.2626E-02 | 0.4466E+01 |
| 0.1177E-02 |            |            |            |            |            |            |            |
| 75         | 0.4509E+01 | 0.1543E-02 | 0.4288E+01 | 0.1823E-02 | 0.3977E+01 | 0.2188E-02 | 0.4602E+01 |
| 0.1080E-02 |            |            |            |            |            |            |            |

V2\_Results\_baseline\_Irena\_accel.dat

|            |            |            |            |            |            |            |            |
|------------|------------|------------|------------|------------|------------|------------|------------|
| 80         | 0.4644E+01 | 0.1354E-02 | 0.4419E+01 | 0.1444E-02 | 0.4104E+01 | 0.1788E-02 | 0.4738E+01 |
| 0.1026E-02 |            |            |            |            |            |            |            |
| 85         | 0.4779E+01 | 0.1000E-02 | 0.4549E+01 | 0.1183E-02 | 0.4232E+01 | 0.1553E-02 | 0.4873E+01 |
| 0.7722E-03 |            |            |            |            |            |            |            |
| 90         | 0.4915E+01 | 0.6768E-03 | 0.4679E+01 | 0.8536E-03 | 0.4359E+01 | 0.1208E-02 | 0.5009E+01 |
| 0.5730E-03 |            |            |            |            |            |            |            |
| 95         | 0.5050E+01 | 0.4825E-03 | 0.4810E+01 | 0.5648E-03 | 0.4487E+01 | 0.8149E-03 | 0.5144E+01 |
| 0.3741E-03 |            |            |            |            |            |            |            |
| 100        | 0.5186E+01 | 0.4181E-03 | 0.4940E+01 | 0.4746E-03 | 0.4615E+01 | 0.6018E-03 | 0.5280E+01 |
| 0.2801E-03 |            |            |            |            |            |            |            |
| 105        | 0.5321E+01 | 0.3358E-03 | 0.5071E+01 | 0.5315E-03 | 0.4742E+01 | 0.6405E-03 | 0.5416E+01 |
| 0.2983E-03 |            |            |            |            |            |            |            |
| 110        | 0.5456E+01 | 0.3256E-03 | 0.5201E+01 | 0.4702E-03 | 0.4870E+01 | 0.7029E-03 | 0.5551E+01 |
| 0.2744E-03 |            |            |            |            |            |            |            |
| 115        | 0.5592E+01 | 0.3251E-03 | 0.5331E+01 | 0.3538E-03 | 0.4997E+01 | 0.5579E-03 | 0.5687E+01 |
| 0.2822E-03 |            |            |            |            |            |            |            |
| 120        | 0.5727E+01 | 0.3873E-03 | 0.5462E+01 | 0.2118E-03 | 0.5125E+01 | 0.3083E-03 | 0.5823E+01 |
| 0.2767E-03 |            |            |            |            |            |            |            |
| 125        | 0.5863E+01 | 0.3398E-03 | 0.5592E+01 | 0.1322E-03 | 0.5252E+01 | 0.2279E-03 | 0.5958E+01 |
| 0.2556E-03 |            |            |            |            |            |            |            |
| 130        | 0.5998E+01 | 0.2758E-03 | 0.5723E+01 | 0.8294E-04 | 0.5380E+01 | 0.2143E-03 | 0.6094E+01 |
| 0.1497E-03 |            |            |            |            |            |            |            |
| 135        | 0.6133E+01 | 0.1302E-03 | 0.5853E+01 | 0.9021E-04 | 0.5507E+01 | 0.1500E-03 | 0.6229E+01 |
| 0.9050E-04 |            |            |            |            |            |            |            |
| 140        | 0.6269E+01 | 0.7014E-04 | 0.5983E+01 | 0.1101E-03 | 0.5635E+01 | 0.8346E-04 | 0.6365E+01 |
| 0.6210E-04 |            |            |            |            |            |            |            |
| 145        | 0.6404E+01 | 0.6567E-04 | 0.6114E+01 | 0.1268E-03 | 0.5762E+01 | 0.8098E-04 | 0.6501E+01 |
| 0.3391E-04 |            |            |            |            |            |            |            |
| 150        | 0.6539E+01 | 0.9364E-04 | 0.6244E+01 | 0.1533E-03 | 0.5890E+01 | 0.6812E-04 | 0.6636E+01 |
| 0.0000E+00 |            |            |            |            |            |            |            |
| 155        | 0.6675E+01 | 0.9026E-04 | 0.6375E+01 | 0.1382E-03 | 0.6017E+01 | 0.7641E-04 | 0.6772E+01 |
| 0.2400E-04 |            |            |            |            |            |            |            |
| 160        | 0.6810E+01 | 0.5019E-04 | 0.6505E+01 | 0.8282E-04 | 0.6145E+01 | 0.8284E-04 | 0.6908E+01 |
| 0.8233E-04 |            |            |            |            |            |            |            |
| 165        | 0.6946E+01 | 0.1340E-04 | 0.6635E+01 | 0.9497E-05 | 0.6272E+01 | 0.6558E-04 | 0.7043E+01 |
| 0.1495E-03 |            |            |            |            |            |            |            |

```

                                V2_Results_baseline_Irena_accel.dat
170  0.7081E+01  0.3052E-04  0.6766E+01  0.0000E+00  0.6400E+01  0.2385E-04  0.7179E+01
0.1512E-03
175  0.7216E+01  0.8872E-04  0.6896E+01  0.0000E+00  0.6527E+01  0.0000E+00  0.7315E+01
0.8377E-04
180  0.7352E+01  0.1233E-03  0.7027E+01  0.1488E-04  0.6655E+01  0.0000E+00  0.7450E+01
0.2655E-04
185  0.7487E+01  0.1033E-03  0.7157E+01  0.3066E-04  0.6783E+01  0.0000E+00  0.7586E+01
0.1867E-04
190  0.7623E+01  0.4341E-04  0.7287E+01  0.2726E-04  0.6910E+01  0.0000E+00  0.7721E+01
0.3150E-04
195  0.7758E+01  0.4875E-04  0.7418E+01  0.2472E-04  0.7038E+01  0.2056E-04  0.7857E+01
0.4270E-04
200  0.7893E+01  0.4162E-04  0.7548E+01  0.3156E-04  0.7165E+01  0.3155E-04  0.7993E+01
0.3154E-04

```

```

#      *****      adaptados para un plot en 3D con gnuplot      *****

```

```

-0.2938E+01  0.1228E-03  0.2020E+04
-0.2802E+01  0.3007E-03  0.2020E+04
-0.2667E+01  0.6043E-03  0.2020E+04
-0.2531E+01  0.1551E-02  0.2020E+04
-0.2396E+01  0.3798E-02  0.2020E+04
-0.2261E+01  0.8036E-02  0.2020E+04
-0.2125E+01  0.1516E-01  0.2020E+04
-0.1990E+01  0.2708E-01  0.2020E+04
-0.1854E+01  0.4760E-01  0.2020E+04
-0.1719E+01  0.7488E-01  0.2020E+04
-0.1584E+01  0.1083E+00  0.2020E+04
-0.1448E+01  0.1473E+00  0.2020E+04
-0.1313E+01  0.1911E+00  0.2020E+04
-0.1178E+01  0.2382E+00  0.2020E+04
-0.1042E+01  0.2855E+00  0.2020E+04
-0.9067E+00  0.3313E+00  0.2020E+04
-0.7714E+00  0.3700E+00  0.2020E+04
-0.6360E+00  0.4013E+00  0.2020E+04
-0.5006E+00  0.4199E+00  0.2020E+04

```

V2\_Results\_baseline\_Irena\_accel.dat

|             |            |            |
|-------------|------------|------------|
| -0.3652E+00 | 0.4288E+00 | 0.2020E+04 |
| -0.2298E+00 | 0.4287E+00 | 0.2020E+04 |
| -0.9443E-01 | 0.4191E+00 | 0.2020E+04 |
| 0.4096E-01  | 0.4011E+00 | 0.2020E+04 |
| 0.1763E+00  | 0.3800E+00 | 0.2020E+04 |
| 0.3117E+00  | 0.3500E+00 | 0.2020E+04 |
| 0.4471E+00  | 0.3159E+00 | 0.2020E+04 |
| 0.5825E+00  | 0.2856E+00 | 0.2020E+04 |
| 0.7179E+00  | 0.2539E+00 | 0.2020E+04 |
| 0.8533E+00  | 0.2210E+00 | 0.2020E+04 |
| 0.9887E+00  | 0.1923E+00 | 0.2020E+04 |
| 0.1124E+01  | 0.1681E+00 | 0.2020E+04 |
| 0.1259E+01  | 0.1463E+00 | 0.2020E+04 |
| 0.1395E+01  | 0.1235E+00 | 0.2020E+04 |
| 0.1530E+01  | 0.1034E+00 | 0.2020E+04 |
| 0.1666E+01  | 0.8754E-01 | 0.2020E+04 |
| 0.1801E+01  | 0.7454E-01 | 0.2020E+04 |
| 0.1936E+01  | 0.6145E-01 | 0.2020E+04 |
| 0.2072E+01  | 0.5087E-01 | 0.2020E+04 |
| 0.2207E+01  | 0.4113E-01 | 0.2020E+04 |
| 0.2343E+01  | 0.3296E-01 | 0.2020E+04 |
| 0.2478E+01  | 0.2666E-01 | 0.2020E+04 |
| 0.2613E+01  | 0.2222E-01 | 0.2020E+04 |
| 0.2749E+01  | 0.1843E-01 | 0.2020E+04 |
| 0.2884E+01  | 0.1438E-01 | 0.2020E+04 |
| 0.3019E+01  | 0.1133E-01 | 0.2020E+04 |
| 0.3155E+01  | 0.9823E-02 | 0.2020E+04 |
| 0.3290E+01  | 0.8168E-02 | 0.2020E+04 |
| 0.3426E+01  | 0.6474E-02 | 0.2020E+04 |
| 0.3561E+01  | 0.5075E-02 | 0.2020E+04 |
| 0.3696E+01  | 0.4212E-02 | 0.2020E+04 |
| 0.3832E+01  | 0.3613E-02 | 0.2020E+04 |
| 0.3967E+01  | 0.2972E-02 | 0.2020E+04 |
| 0.4103E+01  | 0.2430E-02 | 0.2020E+04 |
| 0.4238E+01  | 0.1974E-02 | 0.2020E+04 |
| 0.4373E+01  | 0.1671E-02 | 0.2020E+04 |

V2\_Results\_baseline\_Irena\_accel.dat

|             |            |            |
|-------------|------------|------------|
| 0.4509E+01  | 0.1543E-02 | 0.2020E+04 |
| 0.4644E+01  | 0.1354E-02 | 0.2020E+04 |
| 0.4779E+01  | 0.1000E-02 | 0.2020E+04 |
| 0.4915E+01  | 0.6768E-03 | 0.2020E+04 |
| 0.5050E+01  | 0.4825E-03 | 0.2020E+04 |
| 0.5186E+01  | 0.4181E-03 | 0.2020E+04 |
| 0.5321E+01  | 0.3358E-03 | 0.2020E+04 |
| 0.5456E+01  | 0.3256E-03 | 0.2020E+04 |
| 0.5592E+01  | 0.3251E-03 | 0.2020E+04 |
| 0.5727E+01  | 0.3873E-03 | 0.2020E+04 |
| 0.5863E+01  | 0.3398E-03 | 0.2020E+04 |
| 0.5998E+01  | 0.2758E-03 | 0.2020E+04 |
| 0.6133E+01  | 0.1302E-03 | 0.2020E+04 |
| 0.6269E+01  | 0.7014E-04 | 0.2020E+04 |
| 0.6404E+01  | 0.6567E-04 | 0.2020E+04 |
| 0.6539E+01  | 0.9364E-04 | 0.2020E+04 |
| 0.6675E+01  | 0.9026E-04 | 0.2020E+04 |
| 0.6810E+01  | 0.5019E-04 | 0.2020E+04 |
| 0.6946E+01  | 0.1340E-04 | 0.2020E+04 |
| 0.7081E+01  | 0.3052E-04 | 0.2020E+04 |
| 0.7216E+01  | 0.8872E-04 | 0.2020E+04 |
| 0.7352E+01  | 0.1233E-03 | 0.2020E+04 |
| 0.7487E+01  | 0.1033E-03 | 0.2020E+04 |
| 0.7623E+01  | 0.4341E-04 | 0.2020E+04 |
| 0.7758E+01  | 0.4875E-04 | 0.2020E+04 |
| 0.7893E+01  | 0.4162E-04 | 0.2020E+04 |
|             |            |            |
| -0.2884E+01 | 0.7391E-04 | 0.2030E+04 |
| -0.2754E+01 | 0.2496E-03 | 0.2030E+04 |
| -0.2623E+01 | 0.8527E-03 | 0.2030E+04 |
| -0.2493E+01 | 0.2214E-02 | 0.2030E+04 |
| -0.2363E+01 | 0.4726E-02 | 0.2030E+04 |
| -0.2232E+01 | 0.9759E-02 | 0.2030E+04 |
| -0.2102E+01 | 0.1841E-01 | 0.2030E+04 |
| -0.1971E+01 | 0.3146E-01 | 0.2030E+04 |
| -0.1841E+01 | 0.5061E-01 | 0.2030E+04 |

V2\_Results\_baseline\_Irena\_accel.dat

|             |            |            |
|-------------|------------|------------|
| -0.1711E+01 | 0.7748E-01 | 0.2030E+04 |
| -0.1580E+01 | 0.1118E+00 | 0.2030E+04 |
| -0.1450E+01 | 0.1498E+00 | 0.2030E+04 |
| -0.1319E+01 | 0.1910E+00 | 0.2030E+04 |
| -0.1189E+01 | 0.2357E+00 | 0.2030E+04 |
| -0.1059E+01 | 0.2828E+00 | 0.2030E+04 |
| -0.9281E+00 | 0.3247E+00 | 0.2030E+04 |
| -0.7977E+00 | 0.3604E+00 | 0.2030E+04 |
| -0.6673E+00 | 0.3887E+00 | 0.2030E+04 |
| -0.5369E+00 | 0.4108E+00 | 0.2030E+04 |
| -0.4065E+00 | 0.4255E+00 | 0.2030E+04 |
| -0.2761E+00 | 0.4284E+00 | 0.2030E+04 |
| -0.1457E+00 | 0.4185E+00 | 0.2030E+04 |
| -0.1529E-01 | 0.4019E+00 | 0.2030E+04 |
| 0.1151E+00  | 0.3839E+00 | 0.2030E+04 |
| 0.2455E+00  | 0.3597E+00 | 0.2030E+04 |
| 0.3759E+00  | 0.3306E+00 | 0.2030E+04 |
| 0.5063E+00  | 0.3010E+00 | 0.2030E+04 |
| 0.6367E+00  | 0.2731E+00 | 0.2030E+04 |
| 0.7672E+00  | 0.2463E+00 | 0.2030E+04 |
| 0.8976E+00  | 0.2214E+00 | 0.2030E+04 |
| 0.1028E+01  | 0.1947E+00 | 0.2030E+04 |
| 0.1158E+01  | 0.1659E+00 | 0.2030E+04 |
| 0.1289E+01  | 0.1389E+00 | 0.2030E+04 |
| 0.1419E+01  | 0.1195E+00 | 0.2030E+04 |
| 0.1550E+01  | 0.1030E+00 | 0.2030E+04 |
| 0.1680E+01  | 0.8763E-01 | 0.2030E+04 |
| 0.1810E+01  | 0.7395E-01 | 0.2030E+04 |
| 0.1941E+01  | 0.6198E-01 | 0.2030E+04 |
| 0.2071E+01  | 0.5040E-01 | 0.2030E+04 |
| 0.2202E+01  | 0.4053E-01 | 0.2030E+04 |
| 0.2332E+01  | 0.3369E-01 | 0.2030E+04 |
| 0.2462E+01  | 0.2814E-01 | 0.2030E+04 |
| 0.2593E+01  | 0.2309E-01 | 0.2030E+04 |
| 0.2723E+01  | 0.1913E-01 | 0.2030E+04 |
| 0.2854E+01  | 0.1588E-01 | 0.2030E+04 |

V2\_Results\_baseline\_Irena\_accel.dat

|            |            |            |
|------------|------------|------------|
| 0.2984E+01 | 0.1308E-01 | 0.2030E+04 |
| 0.3114E+01 | 0.1045E-01 | 0.2030E+04 |
| 0.3245E+01 | 0.8638E-02 | 0.2030E+04 |
| 0.3375E+01 | 0.7136E-02 | 0.2030E+04 |
| 0.3506E+01 | 0.5589E-02 | 0.2030E+04 |
| 0.3636E+01 | 0.4385E-02 | 0.2030E+04 |
| 0.3766E+01 | 0.3695E-02 | 0.2030E+04 |
| 0.3897E+01 | 0.3100E-02 | 0.2030E+04 |
| 0.4027E+01 | 0.2582E-02 | 0.2030E+04 |
| 0.4158E+01 | 0.2198E-02 | 0.2030E+04 |
| 0.4288E+01 | 0.1823E-02 | 0.2030E+04 |
| 0.4419E+01 | 0.1444E-02 | 0.2030E+04 |
| 0.4549E+01 | 0.1183E-02 | 0.2030E+04 |
| 0.4679E+01 | 0.8536E-03 | 0.2030E+04 |
| 0.4810E+01 | 0.5648E-03 | 0.2030E+04 |
| 0.4940E+01 | 0.4746E-03 | 0.2030E+04 |
| 0.5071E+01 | 0.5315E-03 | 0.2030E+04 |
| 0.5201E+01 | 0.4702E-03 | 0.2030E+04 |
| 0.5331E+01 | 0.3538E-03 | 0.2030E+04 |
| 0.5462E+01 | 0.2118E-03 | 0.2030E+04 |
| 0.5592E+01 | 0.1322E-03 | 0.2030E+04 |
| 0.5723E+01 | 0.8294E-04 | 0.2030E+04 |
| 0.5853E+01 | 0.9021E-04 | 0.2030E+04 |
| 0.5983E+01 | 0.1101E-03 | 0.2030E+04 |
| 0.6114E+01 | 0.1268E-03 | 0.2030E+04 |
| 0.6244E+01 | 0.1533E-03 | 0.2030E+04 |
| 0.6375E+01 | 0.1382E-03 | 0.2030E+04 |
| 0.6505E+01 | 0.8282E-04 | 0.2030E+04 |
| 0.6635E+01 | 0.9497E-05 | 0.2030E+04 |
| 0.6766E+01 | 0.0000E+00 | 0.2030E+04 |
| 0.6896E+01 | 0.0000E+00 | 0.2030E+04 |
| 0.7027E+01 | 0.1488E-04 | 0.2030E+04 |
| 0.7157E+01 | 0.3066E-04 | 0.2030E+04 |
| 0.7287E+01 | 0.2726E-04 | 0.2030E+04 |
| 0.7418E+01 | 0.2472E-04 | 0.2030E+04 |
| 0.7548E+01 | 0.3156E-04 | 0.2030E+04 |

V2\_Results\_baseline\_Irena\_accel.dat

|             |            |            |
|-------------|------------|------------|
| -0.3037E+01 | 0.9947E-04 | 0.2040E+04 |
| -0.2910E+01 | 0.1830E-03 | 0.2040E+04 |
| -0.2782E+01 | 0.3798E-03 | 0.2040E+04 |
| -0.2655E+01 | 0.1084E-02 | 0.2040E+04 |
| -0.2527E+01 | 0.2462E-02 | 0.2040E+04 |
| -0.2399E+01 | 0.4943E-02 | 0.2040E+04 |
| -0.2272E+01 | 0.9483E-02 | 0.2040E+04 |
| -0.2144E+01 | 0.1701E-01 | 0.2040E+04 |
| -0.2017E+01 | 0.2896E-01 | 0.2040E+04 |
| -0.1889E+01 | 0.4659E-01 | 0.2040E+04 |
| -0.1762E+01 | 0.6971E-01 | 0.2040E+04 |
| -0.1634E+01 | 0.9809E-01 | 0.2040E+04 |
| -0.1507E+01 | 0.1328E+00 | 0.2040E+04 |
| -0.1379E+01 | 0.1735E+00 | 0.2040E+04 |
| -0.1252E+01 | 0.2161E+00 | 0.2040E+04 |
| -0.1124E+01 | 0.2595E+00 | 0.2040E+04 |
| -0.9967E+00 | 0.3003E+00 | 0.2040E+04 |
| -0.8692E+00 | 0.3363E+00 | 0.2040E+04 |
| -0.7416E+00 | 0.3659E+00 | 0.2040E+04 |
| -0.6141E+00 | 0.3937E+00 | 0.2040E+04 |
| -0.4866E+00 | 0.4133E+00 | 0.2040E+04 |
| -0.3591E+00 | 0.4223E+00 | 0.2040E+04 |
| -0.2315E+00 | 0.4178E+00 | 0.2040E+04 |
| -0.1040E+00 | 0.4056E+00 | 0.2040E+04 |
| 0.2353E-01  | 0.3918E+00 | 0.2040E+04 |
| 0.1511E+00  | 0.3756E+00 | 0.2040E+04 |
| 0.2786E+00  | 0.3548E+00 | 0.2040E+04 |
| 0.4061E+00  | 0.3277E+00 | 0.2040E+04 |
| 0.5336E+00  | 0.2987E+00 | 0.2040E+04 |
| 0.6612E+00  | 0.2698E+00 | 0.2040E+04 |
| 0.7887E+00  | 0.2427E+00 | 0.2040E+04 |
| 0.9162E+00  | 0.2181E+00 | 0.2040E+04 |
| 0.1044E+01  | 0.1918E+00 | 0.2040E+04 |
| 0.1171E+01  | 0.1661E+00 | 0.2040E+04 |
| 0.1299E+01  | 0.1429E+00 | 0.2040E+04 |

V2\_Results\_baseline\_Irena\_accel.dat

|            |            |            |
|------------|------------|------------|
| 0.1426E+01 | 0.1235E+00 | 0.2040E+04 |
| 0.1554E+01 | 0.1045E+00 | 0.2040E+04 |
| 0.1681E+01 | 0.9003E-01 | 0.2040E+04 |
| 0.1809E+01 | 0.7706E-01 | 0.2040E+04 |
| 0.1936E+01 | 0.6432E-01 | 0.2040E+04 |
| 0.2064E+01 | 0.5270E-01 | 0.2040E+04 |
| 0.2192E+01 | 0.4362E-01 | 0.2040E+04 |
| 0.2319E+01 | 0.3549E-01 | 0.2040E+04 |
| 0.2447E+01 | 0.2850E-01 | 0.2040E+04 |
| 0.2574E+01 | 0.2354E-01 | 0.2040E+04 |
| 0.2702E+01 | 0.1987E-01 | 0.2040E+04 |
| 0.2829E+01 | 0.1672E-01 | 0.2040E+04 |
| 0.2957E+01 | 0.1337E-01 | 0.2040E+04 |
| 0.3084E+01 | 0.1065E-01 | 0.2040E+04 |
| 0.3212E+01 | 0.8653E-02 | 0.2040E+04 |
| 0.3339E+01 | 0.6807E-02 | 0.2040E+04 |
| 0.3467E+01 | 0.5182E-02 | 0.2040E+04 |
| 0.3594E+01 | 0.4003E-02 | 0.2040E+04 |
| 0.3722E+01 | 0.3272E-02 | 0.2040E+04 |
| 0.3849E+01 | 0.2626E-02 | 0.2040E+04 |
| 0.3977E+01 | 0.2188E-02 | 0.2040E+04 |
| 0.4104E+01 | 0.1788E-02 | 0.2040E+04 |
| 0.4232E+01 | 0.1553E-02 | 0.2040E+04 |
| 0.4359E+01 | 0.1208E-02 | 0.2040E+04 |
| 0.4487E+01 | 0.8149E-03 | 0.2040E+04 |
| 0.4615E+01 | 0.6018E-03 | 0.2040E+04 |
| 0.4742E+01 | 0.6405E-03 | 0.2040E+04 |
| 0.4870E+01 | 0.7029E-03 | 0.2040E+04 |
| 0.4997E+01 | 0.5579E-03 | 0.2040E+04 |
| 0.5125E+01 | 0.3083E-03 | 0.2040E+04 |
| 0.5252E+01 | 0.2279E-03 | 0.2040E+04 |
| 0.5380E+01 | 0.2143E-03 | 0.2040E+04 |
| 0.5507E+01 | 0.1500E-03 | 0.2040E+04 |
| 0.5635E+01 | 0.8346E-04 | 0.2040E+04 |
| 0.5762E+01 | 0.8098E-04 | 0.2040E+04 |
| 0.5890E+01 | 0.6812E-04 | 0.2040E+04 |

V2\_Results\_baseline\_Irena\_accel.dat

|             |            |            |
|-------------|------------|------------|
| 0.6017E+01  | 0.7641E-04 | 0.2040E+04 |
| 0.6145E+01  | 0.8284E-04 | 0.2040E+04 |
| 0.6272E+01  | 0.6558E-04 | 0.2040E+04 |
| 0.6400E+01  | 0.2385E-04 | 0.2040E+04 |
| 0.6527E+01  | 0.0000E+00 | 0.2040E+04 |
| 0.6655E+01  | 0.0000E+00 | 0.2040E+04 |
| 0.6783E+01  | 0.0000E+00 | 0.2040E+04 |
| 0.6910E+01  | 0.0000E+00 | 0.2040E+04 |
| 0.7038E+01  | 0.2056E-04 | 0.2040E+04 |
| 0.7165E+01  | 0.3155E-04 | 0.2040E+04 |
|             |            |            |
| -0.2858E+01 | 0.1673E-03 | 0.2050E+04 |
| -0.2722E+01 | 0.5229E-03 | 0.2050E+04 |
| -0.2587E+01 | 0.1259E-02 | 0.2050E+04 |
| -0.2451E+01 | 0.2803E-02 | 0.2050E+04 |
| -0.2315E+01 | 0.5813E-02 | 0.2050E+04 |
| -0.2180E+01 | 0.1140E-01 | 0.2050E+04 |
| -0.2044E+01 | 0.2230E-01 | 0.2050E+04 |
| -0.1908E+01 | 0.3929E-01 | 0.2050E+04 |
| -0.1773E+01 | 0.6215E-01 | 0.2050E+04 |
| -0.1637E+01 | 0.9390E-01 | 0.2050E+04 |
| -0.1501E+01 | 0.1328E+00 | 0.2050E+04 |
| -0.1366E+01 | 0.1770E+00 | 0.2050E+04 |
| -0.1230E+01 | 0.2248E+00 | 0.2050E+04 |
| -0.1095E+01 | 0.2727E+00 | 0.2050E+04 |
| -0.9590E+00 | 0.3170E+00 | 0.2050E+04 |
| -0.8233E+00 | 0.3563E+00 | 0.2050E+04 |
| -0.6877E+00 | 0.3869E+00 | 0.2050E+04 |
| -0.5521E+00 | 0.4050E+00 | 0.2050E+04 |
| -0.4164E+00 | 0.4173E+00 | 0.2050E+04 |
| -0.2808E+00 | 0.4238E+00 | 0.2050E+04 |
| -0.1452E+00 | 0.4205E+00 | 0.2050E+04 |
| -0.9541E-02 | 0.4076E+00 | 0.2050E+04 |
| 0.1261E+00  | 0.3886E+00 | 0.2050E+04 |
| 0.2617E+00  | 0.3603E+00 | 0.2050E+04 |
| 0.3974E+00  | 0.3290E+00 | 0.2050E+04 |

V2\_Results\_baseline\_Irena\_accel.dat

|            |            |            |
|------------|------------|------------|
| 0.5330E+00 | 0.2968E+00 | 0.2050E+04 |
| 0.6686E+00 | 0.2679E+00 | 0.2050E+04 |
| 0.8042E+00 | 0.2363E+00 | 0.2050E+04 |
| 0.9399E+00 | 0.2057E+00 | 0.2050E+04 |
| 0.1076E+01 | 0.1807E+00 | 0.2050E+04 |
| 0.1211E+01 | 0.1555E+00 | 0.2050E+04 |
| 0.1347E+01 | 0.1316E+00 | 0.2050E+04 |
| 0.1482E+01 | 0.1112E+00 | 0.2050E+04 |
| 0.1618E+01 | 0.9322E-01 | 0.2050E+04 |
| 0.1754E+01 | 0.7878E-01 | 0.2050E+04 |
| 0.1889E+01 | 0.6607E-01 | 0.2050E+04 |
| 0.2025E+01 | 0.5386E-01 | 0.2050E+04 |
| 0.2161E+01 | 0.4221E-01 | 0.2050E+04 |
| 0.2296E+01 | 0.3506E-01 | 0.2050E+04 |
| 0.2432E+01 | 0.2999E-01 | 0.2050E+04 |
| 0.2567E+01 | 0.2481E-01 | 0.2050E+04 |
| 0.2703E+01 | 0.1964E-01 | 0.2050E+04 |
| 0.2839E+01 | 0.1541E-01 | 0.2050E+04 |
| 0.2974E+01 | 0.1250E-01 | 0.2050E+04 |
| 0.3110E+01 | 0.1062E-01 | 0.2050E+04 |
| 0.3246E+01 | 0.8813E-02 | 0.2050E+04 |
| 0.3381E+01 | 0.6682E-02 | 0.2050E+04 |
| 0.3517E+01 | 0.5645E-02 | 0.2050E+04 |
| 0.3652E+01 | 0.4846E-02 | 0.2050E+04 |
| 0.3788E+01 | 0.3706E-02 | 0.2050E+04 |
| 0.3924E+01 | 0.2723E-02 | 0.2050E+04 |
| 0.4059E+01 | 0.2344E-02 | 0.2050E+04 |
| 0.4195E+01 | 0.2074E-02 | 0.2050E+04 |
| 0.4331E+01 | 0.1631E-02 | 0.2050E+04 |
| 0.4466E+01 | 0.1177E-02 | 0.2050E+04 |
| 0.4602E+01 | 0.1080E-02 | 0.2050E+04 |
| 0.4738E+01 | 0.1026E-02 | 0.2050E+04 |
| 0.4873E+01 | 0.7722E-03 | 0.2050E+04 |
| 0.5009E+01 | 0.5730E-03 | 0.2050E+04 |
| 0.5144E+01 | 0.3741E-03 | 0.2050E+04 |
| 0.5280E+01 | 0.2801E-03 | 0.2050E+04 |

V2\_Results\_baseline\_Irena\_accel.dat

|            |            |            |
|------------|------------|------------|
| 0.5416E+01 | 0.2983E-03 | 0.2050E+04 |
| 0.5551E+01 | 0.2744E-03 | 0.2050E+04 |
| 0.5687E+01 | 0.2822E-03 | 0.2050E+04 |
| 0.5823E+01 | 0.2767E-03 | 0.2050E+04 |
| 0.5958E+01 | 0.2556E-03 | 0.2050E+04 |
| 0.6094E+01 | 0.1497E-03 | 0.2050E+04 |
| 0.6229E+01 | 0.9050E-04 | 0.2050E+04 |
| 0.6365E+01 | 0.6210E-04 | 0.2050E+04 |
| 0.6501E+01 | 0.3391E-04 | 0.2050E+04 |
| 0.6636E+01 | 0.0000E+00 | 0.2050E+04 |
| 0.6772E+01 | 0.2400E-04 | 0.2050E+04 |
| 0.6908E+01 | 0.8233E-04 | 0.2050E+04 |
| 0.7043E+01 | 0.1495E-03 | 0.2050E+04 |
| 0.7179E+01 | 0.1512E-03 | 0.2050E+04 |
| 0.7315E+01 | 0.8377E-04 | 0.2050E+04 |
| 0.7450E+01 | 0.2655E-04 | 0.2050E+04 |
| 0.7586E+01 | 0.1867E-04 | 0.2050E+04 |
| 0.7721E+01 | 0.3150E-04 | 0.2050E+04 |
| 0.7857E+01 | 0.4270E-04 | 0.2050E+04 |
| 0.7993E+01 | 0.3154E-04 | 0.2050E+04 |

```

#*****
#*****          AVOIDED CARBON VALUES ($ tr.)          *****
#*****
# Valued at:    1 US$,    Social Carbon Cost,    Tax IEA,    Tax S.S.
               0.3572E+00    0.4362E+01    0.4118E+02    0.2577E+02

```

```

#*****
#*****          CAPOPEX (all; tr. US$): SUMMARY STATISTICS *****
#*****

```

MEAN, VARIANCE, SKW, KURT & MAX. VALUES 50%, 80%, 90%, 95%

|           |           |           |           |           |           |           |           |
|-----------|-----------|-----------|-----------|-----------|-----------|-----------|-----------|
| 0.244E+02 | 0.833E+01 | 0.552E+00 | 0.361E+01 | 0.241E+02 | 0.266E+02 | 0.281E+02 | 0.294E+02 |
|-----------|-----------|-----------|-----------|-----------|-----------|-----------|-----------|

V2\_Results\_baseline\_Irena\_accel.dat

CapOpStrEx EXPECT. / ( CapOpStrEx > CapOpStrEx max. al 80%, 90%, 95%)

0.2891E+02 0.3029E+02 0.3108E+02

#####  
 #\*\*\*\*\* CAPITAL COSTS - AVOIDED CARBON VALUES (US\$ tr.) \*\*\*\*\*  
 #\*\*\*\*\*

# Valued at: 1 US\$, Social Carbon Cost, Tax IEA, Tax S.S.  
 0.2399E+02 0.1999E+02 -0.1683E+02 -0.1423E+01

#####  
 #\*\*\*\*\* CAPITAL PRICES (USD/1W) \*\*\*\*\*  
 #\*\*\*\*\*

# MEANS, VARIANCES & MAX. VALUES 50%, 80%, 90%, 95%  
 # ALL YEARS: 2015-2050

|      |           |           |           |           |           |           |
|------|-----------|-----------|-----------|-----------|-----------|-----------|
| 2015 | 0.130E+01 | 0.680E-01 | 0.127E+01 | 0.149E+01 | 0.164E+01 | 0.177E+01 |
| 2016 | 0.101E+01 | 0.477E-01 | 0.980E+00 | 0.117E+01 | 0.129E+01 | 0.141E+01 |
| 2017 | 0.920E+00 | 0.395E-01 | 0.894E+00 | 0.107E+01 | 0.117E+01 | 0.128E+01 |
| 2018 | 0.863E+00 | 0.346E-01 | 0.841E+00 | 0.100E+01 | 0.110E+01 | 0.119E+01 |
| 2019 | 0.822E+00 | 0.314E-01 | 0.800E+00 | 0.956E+00 | 0.105E+01 | 0.114E+01 |
| 2020 | 0.790E+00 | 0.292E-01 | 0.767E+00 | 0.917E+00 | 0.101E+01 | 0.109E+01 |
| 2021 | 0.765E+00 | 0.276E-01 | 0.745E+00 | 0.887E+00 | 0.978E+00 | 0.106E+01 |
| 2022 | 0.742E+00 | 0.258E-01 | 0.723E+00 | 0.863E+00 | 0.947E+00 | 0.103E+01 |
| 2023 | 0.724E+00 | 0.249E-01 | 0.703E+00 | 0.842E+00 | 0.927E+00 | 0.101E+01 |
| 2024 | 0.708E+00 | 0.239E-01 | 0.687E+00 | 0.825E+00 | 0.905E+00 | 0.985E+00 |
| 2025 | 0.694E+00 | 0.228E-01 | 0.675E+00 | 0.809E+00 | 0.890E+00 | 0.965E+00 |
| 2026 | 0.682E+00 | 0.223E-01 | 0.663E+00 | 0.792E+00 | 0.873E+00 | 0.950E+00 |
| 2027 | 0.670E+00 | 0.214E-01 | 0.651E+00 | 0.779E+00 | 0.858E+00 | 0.931E+00 |
| 2028 | 0.662E+00 | 0.209E-01 | 0.645E+00 | 0.772E+00 | 0.849E+00 | 0.922E+00 |
| 2029 | 0.653E+00 | 0.205E-01 | 0.636E+00 | 0.762E+00 | 0.839E+00 | 0.910E+00 |

V2\_Results\_baseline\_Irena\_accel.dat

|      |           |           |           |           |           |           |
|------|-----------|-----------|-----------|-----------|-----------|-----------|
| 2030 | 0.644E+00 | 0.196E-01 | 0.627E+00 | 0.751E+00 | 0.825E+00 | 0.894E+00 |
| 2031 | 0.111E+01 | 0.592E-01 | 0.108E+01 | 0.129E+01 | 0.142E+01 | 0.154E+01 |
| 2032 | 0.110E+01 | 0.587E-01 | 0.107E+01 | 0.129E+01 | 0.142E+01 | 0.153E+01 |
| 2033 | 0.110E+01 | 0.584E-01 | 0.107E+01 | 0.129E+01 | 0.142E+01 | 0.153E+01 |
| 2034 | 0.109E+01 | 0.574E-01 | 0.107E+01 | 0.128E+01 | 0.141E+01 | 0.152E+01 |
| 2035 | 0.109E+01 | 0.569E-01 | 0.106E+01 | 0.128E+01 | 0.140E+01 | 0.152E+01 |
| 2036 | 0.109E+01 | 0.570E-01 | 0.106E+01 | 0.128E+01 | 0.140E+01 | 0.152E+01 |
| 2037 | 0.106E+01 | 0.528E-01 | 0.103E+01 | 0.123E+01 | 0.136E+01 | 0.147E+01 |
| 2038 | 0.103E+01 | 0.496E-01 | 0.101E+01 | 0.120E+01 | 0.132E+01 | 0.143E+01 |
| 2039 | 0.101E+01 | 0.471E-01 | 0.985E+00 | 0.118E+01 | 0.129E+01 | 0.140E+01 |
| 2040 | 0.832E+00 | 0.297E-01 | 0.811E+00 | 0.967E+00 | 0.106E+01 | 0.114E+01 |
| 2041 | 0.857E+00 | 0.316E-01 | 0.838E+00 | 0.996E+00 | 0.109E+01 | 0.117E+01 |
| 2042 | 0.921E+00 | 0.374E-01 | 0.900E+00 | 0.107E+01 | 0.117E+01 | 0.127E+01 |
| 2043 | 0.105E+01 | 0.523E-01 | 0.103E+01 | 0.123E+01 | 0.135E+01 | 0.146E+01 |
| 2044 | 0.105E+01 | 0.518E-01 | 0.102E+01 | 0.122E+01 | 0.135E+01 | 0.146E+01 |
| 2045 | 0.969E+00 | 0.422E-01 | 0.947E+00 | 0.113E+01 | 0.124E+01 | 0.134E+01 |
| 2046 | 0.639E+00 | 0.197E-01 | 0.622E+00 | 0.746E+00 | 0.820E+00 | 0.886E+00 |
| 2047 | 0.639E+00 | 0.197E-01 | 0.620E+00 | 0.745E+00 | 0.819E+00 | 0.890E+00 |
| 2048 | 0.639E+00 | 0.198E-01 | 0.622E+00 | 0.746E+00 | 0.822E+00 | 0.891E+00 |
| 2049 | 0.640E+00 | 0.199E-01 | 0.624E+00 | 0.748E+00 | 0.820E+00 | 0.892E+00 |
| 2050 | 0.640E+00 | 0.197E-01 | 0.624E+00 | 0.747E+00 | 0.821E+00 | 0.889E+00 |

#####  
#\*\*\*\*\* TOTAL COSTS USD/W: TIMELINE BREAKDOWN \*\*\*\*\*  
#\*\*\*\*\*

| #    | PV cap.(Mod+inv) | PV BoS   | PV Str   | W cap.   | W BoS    | W Str    |      |
|------|------------------|----------|----------|----------|----------|----------|------|
| 2015 | 0.383292         | 0.276980 | 0.121379 | 0.642182 | 0.275221 | 0.128538 | 2015 |
| 2016 | 0.333709         | 0.325820 | 0.139918 | 0.472910 | 0.202676 | 0.100308 |      |
| 2017 | 0.286277         | 0.319576 | 0.134483 | 0.443792 | 0.190197 | 0.096427 |      |
| 2018 | 0.258283         | 0.313456 | 0.129261 | 0.423322 | 0.181424 | 0.092694 |      |
| 2019 | 0.239316         | 0.307427 | 0.124231 | 0.407839 | 0.174788 | 0.089116 |      |
| 2020 | 0.225131         | 0.301496 | 0.119390 | 0.395453 | 0.169480 | 0.085684 | 2020 |
| 2021 | 0.214088         | 0.295731 | 0.114758 | 0.385344 | 0.165148 | 0.082363 |      |
| 2022 | 0.204127         | 0.289758 | 0.110184 | 0.376848 | 0.161506 | 0.079293 |      |

| V2_Results_baseline_Irena_accel.dat |          |          |          |          |          |          |
|-------------------------------------|----------|----------|----------|----------|----------|----------|
| 2023                                | 0.196581 | 0.284213 | 0.105907 | 0.369408 | 0.158318 | 0.076222 |
| 2024                                | 0.190194 | 0.278715 | 0.101775 | 0.362660 | 0.155426 | 0.073291 |
| 2025                                | 0.183751 | 0.272962 | 0.097674 | 0.357440 | 0.153188 | 0.070603 |
| 2026                                | 0.178789 | 0.267488 | 0.093795 | 0.352438 | 0.151045 | 0.067956 |
| 2027                                | 0.173980 | 0.262364 | 0.090152 | 0.347415 | 0.148892 | 0.065326 |
| 2028                                | 0.168996 | 0.256048 | 0.086217 | 0.345385 | 0.148022 | 0.063232 |
| 2029                                | 0.165458 | 0.251274 | 0.082912 | 0.341130 | 0.146199 | 0.060741 |
| 2030                                | 0.161473 | 0.246152 | 0.079592 | 0.337723 | 0.144738 | 0.058490 |
| 2031                                | 0.010672 | 0.015943 | 0.005052 | 0.766512 | 0.328505 | 0.127676 |
| 2032                                | 0.012765 | 0.018688 | 0.005803 | 0.760737 | 0.326030 | 0.121778 |
| 2033                                | 0.012440 | 0.017844 | 0.005430 | 0.762076 | 0.326604 | 0.117203 |
| 2034                                | 0.015200 | 0.021439 | 0.006393 | 0.753762 | 0.323041 | 0.111485 |
| 2035                                | 0.015946 | 0.022019 | 0.006434 | 0.751484 | 0.322065 | 0.106872 |
| 2036                                | 0.015473 | 0.020954 | 0.006000 | 0.752911 | 0.322676 | 0.102912 |
| 2037                                | 0.026476 | 0.035174 | 0.009869 | 0.721776 | 0.309332 | 0.094819 |
| 2038                                | 0.035087 | 0.045761 | 0.012582 | 0.697788 | 0.299052 | 0.088047 |
| 2039                                | 0.041613 | 0.053354 | 0.014375 | 0.678616 | 0.290835 | 0.082351 |
| 2040                                | 0.100095 | 0.125701 | 0.033188 | 0.512413 | 0.219606 | 0.059787 |
| 2041                                | 0.092091 | 0.113548 | 0.029378 | 0.535203 | 0.229373 | 0.059991 |
| 2042                                | 0.071263 | 0.086099 | 0.021829 | 0.594670 | 0.254859 | 0.064074 |
| 2043                                | 0.028466 | 0.033716 | 0.008377 | 0.716387 | 0.307023 | 0.074195 |
| 2044                                | 0.029174 | 0.033930 | 0.008261 | 0.714338 | 0.306145 | 0.071109 |
| 2045                                | 0.055544 | 0.063346 | 0.015113 | 0.639362 | 0.274012 | 0.061179 |
| 2046                                | 0.163568 | 0.182643 | 0.042701 | 0.332986 | 0.142708 | 0.030633 |
| 2047                                | 0.163406 | 0.179119 | 0.041037 | 0.333073 | 0.142746 | 0.029453 |
| 2048                                | 0.163499 | 0.175694 | 0.039445 | 0.333176 | 0.142790 | 0.028311 |
| 2049                                | 0.163494 | 0.172145 | 0.037873 | 0.333693 | 0.143011 | 0.027256 |
| 2050                                | 0.163367 | 0.168852 | 0.036403 | 0.333374 | 0.142874 | 0.026200 |
