# Supplementary material
Source: MDPI journal article supplement (https://www.mdpi.com/1996-1073/12/15/2875)
Supplement: s1 [file s1 › supplementary material/Programs and data/V2_Results_baseline_Irena_delay.pdf]

# V2\_Results\_baseline\_Irena\_delay.dat

# \*\*\* CASO: 1, IEA ; 2, Irena : 2

# \*\*\* Roadmap (1,acelerado; 2,retrasado) : 2

#n° de simulaciones = 100000

# \*\*\*\*\* Parámetros Wind \*\*\*\*\*

#medias ec. precio Turbinas : 2.9666 -0.1860  
 #dev. est. parámetros ec. precio Turbinas : 0.0000 0.0130  
 #dev. est. ec. precio Turbinas : 0.0900  
 #valor inicial en 2014 de Cap 340.6110  
 #depreciación, Performance Ratio, kgCO2 0.984 1.000 0.780  
 #Life Span de los Turbinas 27  
 #Social Discount Rate 0.022500 0.019286  
 #WACC, Loan Maturity 0.050 15  
 #Generación aleatoria de los parámetros = T  
 #Generación aleatoria de los errs. de las ecs. = T  
 #Storage costs tenido en cuenta = T  
 #Modelo Precio Turbinas (1, old; 2, simple; 3, LR dec.; 4, LR +dec. 2

# \*\*\*\*\* Parámetros PV \*\*\*\*\*

#medias ec. precio módulos : 3.6025 -0.3200  
 #dev. est. parámetros ec. precio módulos : 0.1710 0.0240  
 #dev. est. ec. precio módulos : 0.3300  
 #valores iniciales en 2014 de Cap, Pe, Pm, Ps, upm : 157.7609 0.8229 0.7050  
 0.0760 0.0000  
 #depreciación, Performance Ratio, kgCO2 : 0.990 0.850 0.780  
 #Life Span de los módulos : 30  
 #Social Discount Rate : 0.022500 0.019286  
 #WACC, Loan Maturity : 0.090 7  
 #Generación aleatoria de los parámetros = T  
 #Generación aleatoria de los errs. de las ecs. = T  
 #Storage costs tenido en cuenta = T

#Modelo Precio módulos (1, old; 2, simple; 3, LR dec.; 4, LR +dec. : 2

\*\*\*\*\*  
 \*\*\*\*\* ENERGY GENERATED \*\*\*\*\*  
 \*\*\*\*\*

Total, PV, Wind: 0.26711E+12 0.13493E+12 0.13218E+12  
 PV(%), Wind(%): 0.505143 0.494857

#\*\*\*\*\*  
 #\*\*\*\*\* ANNUAL LCE (means; US \$ per Mwh.) \*\*\*\*\*  
 #\*\*\*\*\*  
 #

|  | Total | PV | Wind |
|--|-------|----|------|
|--|-------|----|------|

|      |             |             |             |
|------|-------------|-------------|-------------|
| 2015 | 0.83597E+02 | 0.84012E+02 | 0.83304E+02 |
| 2016 | 0.13076E+03 | 0.10877E+03 | 0.13307E+03 |
| 2017 | 0.12125E+03 | 0.11148E+03 | 0.12217E+03 |
| 2018 | 0.13697E+03 | 0.10621E+03 | 0.14004E+03 |
| 2019 | 0.12850E+03 | 0.10628E+03 | 0.13039E+03 |
| 2020 | 0.11306E+03 | 0.11338E+03 | 0.11304E+03 |
| 2021 | 0.14554E+03 | 0.12087E+03 | 0.14737E+03 |
| 2022 | 0.10116E+03 | 0.13114E+03 | 0.10019E+03 |
| 2023 | 0.10340E+03 | 0.14644E+03 | 0.10199E+03 |
| 2024 | 0.10357E+03 | 0.17390E+03 | 0.10134E+03 |
| 2025 | 0.93542E+02 | 0.18296E+03 | 0.91635E+02 |
| 2026 | 0.94626E+02 | 0.20176E+03 | 0.92535E+02 |
| 2027 | 0.98669E+02 | 0.21212E+03 | 0.95663E+02 |
| 2028 | 0.89222E+02 | 0.27611E+03 | 0.86393E+02 |
| 2029 | 0.96277E+02 | 0.28840E+03 | 0.92318E+02 |
| 2030 | 0.94804E+02 | 0.39332E+03 | 0.87099E+02 |
| 2031 | 0.63560E+02 | 0.56137E+02 | 0.71367E+02 |
| 2032 | 0.59314E+02 | 0.51340E+02 | 0.67645E+02 |
| 2033 | 0.56310E+02 | 0.48274E+02 | 0.64567E+02 |
| 2034 | 0.54077E+02 | 0.45831E+02 | 0.62429E+02 |

V2\_Results\_baseline\_Irena\_delay.dat

|      |             |             |             |
|------|-------------|-------------|-------------|
| 2035 | 0.52626E+02 | 0.44403E+02 | 0.60792E+02 |
| 2036 | 0.50198E+02 | 0.41841E+02 | 0.58163E+02 |
| 2037 | 0.48709E+02 | 0.40389E+02 | 0.56805E+02 |
| 2038 | 0.47514E+02 | 0.39065E+02 | 0.55522E+02 |
| 2039 | 0.46369E+02 | 0.37836E+02 | 0.54308E+02 |
| 2040 | 0.44980E+02 | 0.36692E+02 | 0.53368E+02 |
| 2041 | 0.44122E+02 | 0.35625E+02 | 0.52335E+02 |
| 2042 | 0.43498E+02 | 0.34686E+02 | 0.51258E+02 |
| 2043 | 0.41549E+02 | 0.33760E+02 | 0.50990E+02 |
| 2044 | 0.40710E+02 | 0.32906E+02 | 0.50193E+02 |
| 2045 | 0.40524E+02 | 0.32713E+02 | 0.51085E+02 |
| 2046 | 0.41138E+02 | 0.32558E+02 | 0.50518E+02 |
| 2047 | 0.40545E+02 | 0.31902E+02 | 0.49987E+02 |
| 2048 | 0.40006E+02 | 0.31304E+02 | 0.49512E+02 |
| 2049 | 0.39522E+02 | 0.30737E+02 | 0.49085E+02 |
| 2050 | 0.38987E+02 | 0.30218E+02 | 0.48530E+02 |

#####  
 #\*\*\*\*\* TOTAL, PV & WIND, LCE (US\$/MWh): SUMMARY STATISTICS \*\*\*\*\*  
 #\*\*\*\*\*

\*\*\*\*\* Wind \*\*\*\*\*

MEAN, VARIANCE, SKW, KURT & MAX. VALUES 50%, 80%, 90%, 95%

0.572E+02 0.108E+03 0.583E+00 0.364E+01 0.561E+02 0.653E+02 0.707E+02 0.755E+02

LCE EXPECT. / ( LCE > LCE max. at 80%, 90%, 95%)

0.7297E+02 0.7782E+02 0.8230E+02

\*\*\*\*\* PV \*\*\*\*\*

# V2\_Results\_baseline\_Irena\_delay.dat

MEAN, VARIANCE, SKW, KURT & MAX. VALUES 50%, 80%, 90%, 95%

0.399E+02 0.516E+02 0.127E+01 0.595E+01 0.386E+02 0.449E+02 0.492E+02 0.532E+02

LCE EXPECT. / ( LCE > LCE max. al 80%, 90%, 95%)

0.5066E+02 0.5512E+02 0.5972E+02

\*\*\*\*\* Total \*\*\*\*\*

MEAN, VARIANCE, SKW, KURT & MAX. VALUES 50%, 80%, 90%, 95%

0.484E+02 0.396E+02 0.553E+00 0.362E+01 0.479E+02 0.535E+02 0.566E+02 0.596E+02

LCE EXPECT. / ( LCE > LCE max. al 80%, 90%, 95%)

0.5717E+02 0.6061E+02 0.6296E+02

#\*\*\*\*\*  
#\*\*\*\*\* TOTAL LCE (US\$/MWh): SUMMARY STATISTICS; ALL YEARS: 2015 - 2050 \*\*\*\*\*  
#\*\*\*\*\*

# MEAN, VARIANCE, SKW, KURT, INT: 2.5%, 50%, 80%, 90%, 95%, 97.5%

|   |           |           |           |           |           |           |           |           |
|---|-----------|-----------|-----------|-----------|-----------|-----------|-----------|-----------|
| 1 | 0.836E+02 | 0.142E+03 | 0.739E+00 | 0.427E+01 | 0.637E+02 | 0.823E+02 | 0.928E+02 | 0.991E+02 |
|   | 0.105E+03 | 0.110E+03 |           |           |           |           |           |           |
| 2 | 0.131E+03 | 0.180E+03 | 0.571E+00 | 0.361E+01 | 0.108E+03 | 0.129E+03 | 0.141E+03 | 0.148E+03 |
|   | 0.154E+03 | 0.160E+03 |           |           |           |           |           |           |
| 3 | 0.121E+03 | 0.181E+03 | 0.581E+00 | 0.364E+01 | 0.983E+02 | 0.120E+03 | 0.132E+03 | 0.139E+03 |
|   | 0.145E+03 | 0.151E+03 |           |           |           |           |           |           |
| 4 | 0.137E+03 | 0.178E+03 | 0.570E+00 | 0.359E+01 | 0.114E+03 | 0.136E+03 | 0.148E+03 | 0.154E+03 |

V2\_Results\_baseline\_Irena\_delay.dat

|           |           |           |           |           |           |           |           |           |  |
|-----------|-----------|-----------|-----------|-----------|-----------|-----------|-----------|-----------|--|
| 0.161E+03 | 0.166E+03 |           |           |           |           |           |           |           |  |
| 5         | 0.128E+03 | 0.180E+03 | 0.575E+00 | 0.361E+01 | 0.106E+03 | 0.127E+03 | 0.139E+03 | 0.146E+03 |  |
| 0.152E+03 | 0.158E+03 |           |           |           |           |           |           |           |  |
| 6         | 0.113E+03 | 0.184E+03 | 0.574E+00 | 0.361E+01 | 0.899E+02 | 0.112E+03 | 0.124E+03 | 0.131E+03 |  |
| 0.137E+03 | 0.143E+03 |           |           |           |           |           |           |           |  |
| 7         | 0.146E+03 | 0.182E+03 | 0.581E+00 | 0.366E+01 | 0.123E+03 | 0.144E+03 | 0.156E+03 | 0.163E+03 |  |
| 0.169E+03 | 0.175E+03 |           |           |           |           |           |           |           |  |
| 8         | 0.101E+03 | 0.193E+03 | 0.585E+00 | 0.365E+01 | 0.776E+02 | 0.998E+02 | 0.112E+03 | 0.119E+03 |  |
| 0.126E+03 | 0.132E+03 |           |           |           |           |           |           |           |  |
| 9         | 0.103E+03 | 0.192E+03 | 0.587E+00 | 0.364E+01 | 0.800E+02 | 0.102E+03 | 0.114E+03 | 0.122E+03 |  |
| 0.128E+03 | 0.134E+03 |           |           |           |           |           |           |           |  |
| 10        | 0.104E+03 | 0.192E+03 | 0.599E+00 | 0.368E+01 | 0.801E+02 | 0.102E+03 | 0.114E+03 | 0.122E+03 |  |
| 0.128E+03 | 0.134E+03 |           |           |           |           |           |           |           |  |
| 11        | 0.935E+02 | 0.193E+03 | 0.576E+00 | 0.361E+01 | 0.700E+02 | 0.922E+02 | 0.105E+03 | 0.112E+03 |  |
| 0.118E+03 | 0.124E+03 |           |           |           |           |           |           |           |  |
| 12        | 0.946E+02 | 0.194E+03 | 0.582E+00 | 0.359E+01 | 0.710E+02 | 0.933E+02 | 0.106E+03 | 0.113E+03 |  |
| 0.120E+03 | 0.125E+03 |           |           |           |           |           |           |           |  |
| 13        | 0.987E+02 | 0.190E+03 | 0.587E+00 | 0.365E+01 | 0.751E+02 | 0.973E+02 | 0.110E+03 | 0.117E+03 |  |
| 0.123E+03 | 0.129E+03 |           |           |           |           |           |           |           |  |
| 14        | 0.892E+02 | 0.194E+03 | 0.591E+00 | 0.366E+01 | 0.656E+02 | 0.878E+02 | 0.100E+03 | 0.107E+03 |  |
| 0.114E+03 | 0.120E+03 |           |           |           |           |           |           |           |  |
| 15        | 0.963E+02 | 0.192E+03 | 0.606E+00 | 0.373E+01 | 0.729E+02 | 0.948E+02 | 0.107E+03 | 0.114E+03 |  |
| 0.121E+03 | 0.127E+03 |           |           |           |           |           |           |           |  |
| 16        | 0.948E+02 | 0.187E+03 | 0.583E+00 | 0.364E+01 | 0.715E+02 | 0.933E+02 | 0.106E+03 | 0.113E+03 |  |
| 0.119E+03 | 0.125E+03 |           |           |           |           |           |           |           |  |
| 17        | 0.636E+02 | 0.966E+02 | 0.868E+00 | 0.471E+01 | 0.478E+02 | 0.623E+02 | 0.708E+02 | 0.763E+02 |  |
| 0.812E+02 | 0.861E+02 |           |           |           |           |           |           |           |  |
| 18        | 0.593E+02 | 0.815E+02 | 0.831E+00 | 0.464E+01 | 0.447E+02 | 0.582E+02 | 0.660E+02 | 0.708E+02 |  |
| 0.754E+02 | 0.798E+02 |           |           |           |           |           |           |           |  |
| 19        | 0.563E+02 | 0.725E+02 | 0.795E+00 | 0.446E+01 | 0.424E+02 | 0.553E+02 | 0.627E+02 | 0.672E+02 |  |
| 0.716E+02 | 0.756E+02 |           |           |           |           |           |           |           |  |
| 20        | 0.541E+02 | 0.662E+02 | 0.753E+00 | 0.424E+01 | 0.407E+02 | 0.532E+02 | 0.602E+02 | 0.646E+02 |  |
| 0.686E+02 | 0.723E+02 |           |           |           |           |           |           |           |  |
| 21        | 0.526E+02 | 0.619E+02 | 0.762E+00 | 0.438E+01 | 0.396E+02 | 0.518E+02 | 0.586E+02 | 0.628E+02 |  |
| 0.667E+02 | 0.703E+02 |           |           |           |           |           |           |           |  |
| 22        | 0.502E+02 | 0.586E+02 | 0.718E+00 | 0.412E+01 | 0.376E+02 | 0.493E+02 | 0.562E+02 | 0.601E+02 |  |

# V2\_Results\_baseline\_Irena\_delay.dat

|           |           |           |           |           |           |           |           |           |  |
|-----------|-----------|-----------|-----------|-----------|-----------|-----------|-----------|-----------|--|
| 0.637E+02 | 0.674E+02 |           |           |           |           |           |           |           |  |
| 23        | 0.487E+02 | 0.558E+02 | 0.761E+00 | 0.443E+01 | 0.364E+02 | 0.478E+02 | 0.543E+02 | 0.584E+02 |  |
| 0.619E+02 | 0.655E+02 |           |           |           |           |           |           |           |  |
| 24        | 0.475E+02 | 0.534E+02 | 0.699E+00 | 0.402E+01 | 0.354E+02 | 0.467E+02 | 0.532E+02 | 0.570E+02 |  |
| 0.606E+02 | 0.640E+02 |           |           |           |           |           |           |           |  |
| 25        | 0.464E+02 | 0.514E+02 | 0.701E+00 | 0.401E+01 | 0.345E+02 | 0.456E+02 | 0.518E+02 | 0.557E+02 |  |
| 0.591E+02 | 0.626E+02 |           |           |           |           |           |           |           |  |
| 26        | 0.450E+02 | 0.485E+02 | 0.736E+00 | 0.417E+01 | 0.335E+02 | 0.441E+02 | 0.502E+02 | 0.541E+02 |  |
| 0.574E+02 | 0.606E+02 |           |           |           |           |           |           |           |  |
| 27        | 0.441E+02 | 0.474E+02 | 0.710E+00 | 0.410E+01 | 0.327E+02 | 0.433E+02 | 0.494E+02 | 0.530E+02 |  |
| 0.564E+02 | 0.594E+02 |           |           |           |           |           |           |           |  |
| 28        | 0.435E+02 | 0.473E+02 | 0.687E+00 | 0.400E+01 | 0.321E+02 | 0.428E+02 | 0.487E+02 | 0.525E+02 |  |
| 0.558E+02 | 0.588E+02 |           |           |           |           |           |           |           |  |
| 29        | 0.415E+02 | 0.425E+02 | 0.867E+00 | 0.505E+01 | 0.311E+02 | 0.407E+02 | 0.464E+02 | 0.499E+02 |  |
| 0.531E+02 | 0.562E+02 |           |           |           |           |           |           |           |  |
| 30        | 0.407E+02 | 0.406E+02 | 0.834E+00 | 0.468E+01 | 0.303E+02 | 0.398E+02 | 0.456E+02 | 0.488E+02 |  |
| 0.521E+02 | 0.551E+02 |           |           |           |           |           |           |           |  |
| 31        | 0.405E+02 | 0.409E+02 | 0.862E+00 | 0.466E+01 | 0.303E+02 | 0.397E+02 | 0.454E+02 | 0.487E+02 |  |
| 0.520E+02 | 0.551E+02 |           |           |           |           |           |           |           |  |
| 32        | 0.411E+02 | 0.421E+02 | 0.776E+00 | 0.456E+01 | 0.304E+02 | 0.404E+02 | 0.460E+02 | 0.495E+02 |  |
| 0.526E+02 | 0.557E+02 |           |           |           |           |           |           |           |  |
| 33        | 0.405E+02 | 0.412E+02 | 0.762E+00 | 0.430E+01 | 0.299E+02 | 0.398E+02 | 0.454E+02 | 0.489E+02 |  |
| 0.520E+02 | 0.550E+02 |           |           |           |           |           |           |           |  |
| 34        | 0.400E+02 | 0.406E+02 | 0.764E+00 | 0.433E+01 | 0.296E+02 | 0.393E+02 | 0.448E+02 | 0.482E+02 |  |
| 0.514E+02 | 0.542E+02 |           |           |           |           |           |           |           |  |
| 35        | 0.395E+02 | 0.400E+02 | 0.764E+00 | 0.434E+01 | 0.292E+02 | 0.387E+02 | 0.444E+02 | 0.476E+02 |  |
| 0.509E+02 | 0.536E+02 |           |           |           |           |           |           |           |  |
| 36        | 0.390E+02 | 0.390E+02 | 0.755E+00 | 0.428E+01 | 0.287E+02 | 0.382E+02 | 0.438E+02 | 0.471E+02 |  |
| 0.502E+02 | 0.530E+02 |           |           |           |           |           |           |           |  |

```

#*****
# p.d.f. & C.d.f LCE (US$/MWh): TOTAL, PV, WIND (Smoothed, NOT standardised)
#*****
#
#           Total           PV           Wind

```

V2\_Results\_baseline\_Irena\_delay.dat

```
# ***** NOT standardised *****

-200 0.2774E+02 0.6788E-05 0.1073E-05 0.1217E+00 0.8768E-05 0.2134E-05 0.2596E+02
0.1157E-04 0.2885E-05
-195 0.2853E+02 0.1914E-04 0.1059E-04 0.1339E+01 0.3362E-05 0.9734E-05 0.2721E+02
0.2610E-04 0.2589E-04
-190 0.2932E+02 0.4386E-04 0.3865E-04 0.2555E+01 0.0000E+00 0.1003E-04 0.2846E+02
0.6642E-04 0.8653E-04
-185 0.3011E+02 0.6519E-04 0.8361E-04 0.3772E+01 0.0000E+00 0.1003E-04 0.2970E+02
0.1484E-03 0.2251E-03
-180 0.3090E+02 0.1272E-03 0.1623E-03 0.4989E+01 0.0000E+00 0.1003E-04 0.3095E+02
0.3420E-03 0.5421E-03
-175 0.3169E+02 0.2754E-03 0.3236E-03 0.6206E+01 0.0000E+00 0.1003E-04 0.3220E+02
0.6294E-03 0.1175E-02
-170 0.3248E+02 0.5742E-03 0.6737E-03 0.7423E+01 0.0000E+00 0.1003E-04 0.3344E+02
0.1090E-02 0.2289E-02
-165 0.3327E+02 0.1035E-02 0.1328E-02 0.8640E+01 0.0000E+00 0.1003E-04 0.3469E+02
0.1797E-02 0.4143E-02
-160 0.3406E+02 0.1884E-02 0.2523E-02 0.9857E+01 0.0000E+00 0.1003E-04 0.3594E+02
0.2823E-02 0.7115E-02
-155 0.3485E+02 0.3209E-02 0.4612E-02 0.1107E+02 0.0000E+00 0.1003E-04 0.3718E+02
0.4274E-02 0.1169E-01
-150 0.3564E+02 0.5207E-02 0.8053E-02 0.1229E+02 0.0000E+00 0.1003E-04 0.3843E+02
0.6112E-02 0.1835E-01
-145 0.3643E+02 0.7742E-02 0.1334E-01 0.1351E+02 0.0000E+00 0.1003E-04 0.3968E+02
0.8499E-02 0.2771E-01
-140 0.3723E+02 0.1092E-01 0.2091E-01 0.1472E+02 0.0000E+00 0.1003E-04 0.4092E+02
0.1120E-01 0.4028E-01
-135 0.3802E+02 0.1507E-01 0.3147E-01 0.1594E+02 0.0000E+00 0.1003E-04 0.4217E+02
0.1446E-01 0.5664E-01
-130 0.3881E+02 0.2037E-01 0.4583E-01 0.1716E+02 0.0000E+00 0.1003E-04 0.4342E+02
0.1813E-01 0.7738E-01
-125 0.3960E+02 0.2630E-01 0.6476E-01 0.1837E+02 0.0000E+00 0.1003E-04 0.4466E+02
0.2220E-01 0.1030E+00
-120 0.4039E+02 0.3211E-01 0.8828E-01 0.1959E+02 0.0000E+00 0.1003E-04 0.4591E+02
0.2603E-01 0.1336E+00
```

V2\_Results\_baseline\_Irena\_delay.dat

|            |            |            |            |            |            |            |            |
|------------|------------|------------|------------|------------|------------|------------|------------|
| -115       | 0.4118E+02 | 0.3833E-01 | 0.1166E+00 | 0.2081E+02 | 0.0000E+00 | 0.1003E-04 | 0.4716E+02 |
| 0.2953E-01 | 0.1687E+00 |            |            |            |            |            |            |
| -110       | 0.4197E+02 | 0.4481E-01 | 0.1500E+00 | 0.2203E+02 | 0.0000E+00 | 0.1003E-04 | 0.4840E+02 |
| 0.3254E-01 | 0.2078E+00 |            |            |            |            |            |            |
| -105       | 0.4276E+02 | 0.5103E-01 | 0.1884E+00 | 0.2324E+02 | 0.0000E+00 | 0.1003E-04 | 0.4965E+02 |
| 0.3514E-01 | 0.2504E+00 |            |            |            |            |            |            |
| -100       | 0.4355E+02 | 0.5576E-01 | 0.2311E+00 | 0.2446E+02 | 0.2665E-04 | 0.1987E-04 | 0.5090E+02 |
| 0.3688E-01 | 0.2956E+00 |            |            |            |            |            |            |
| -95        | 0.4434E+02 | 0.5933E-01 | 0.2769E+00 | 0.2568E+02 | 0.3248E-03 | 0.2246E-03 | 0.5214E+02 |
| 0.3814E-01 | 0.3425E+00 |            |            |            |            |            |            |
| -90        | 0.4513E+02 | 0.6219E-01 | 0.3252E+00 | 0.2689E+02 | 0.1886E-02 | 0.1520E-02 | 0.5339E+02 |
| 0.3938E-01 | 0.3910E+00 |            |            |            |            |            |            |
| -85        | 0.4592E+02 | 0.6442E-01 | 0.3755E+00 | 0.2811E+02 | 0.6719E-02 | 0.6960E-02 | 0.5463E+02 |
| 0.4011E-01 | 0.4408E+00 |            |            |            |            |            |            |
| -80        | 0.4671E+02 | 0.6514E-01 | 0.4269E+00 | 0.2933E+02 | 0.1556E-01 | 0.2121E-01 | 0.5588E+02 |
| 0.3980E-01 | 0.4907E+00 |            |            |            |            |            |            |
| -75        | 0.4751E+02 | 0.6506E-01 | 0.4784E+00 | 0.3054E+02 | 0.2791E-01 | 0.4889E-01 | 0.5713E+02 |
| 0.3843E-01 | 0.5393E+00 |            |            |            |            |            |            |
| -70        | 0.4830E+02 | 0.6398E-01 | 0.5294E+00 | 0.3176E+02 | 0.4095E-01 | 0.9245E-01 | 0.5837E+02 |
| 0.3699E-01 | 0.5861E+00 |            |            |            |            |            |            |
| -65        | 0.4909E+02 | 0.6174E-01 | 0.5790E+00 | 0.3298E+02 | 0.5264E-01 | 0.1510E+00 | 0.5962E+02 |
| 0.3515E-01 | 0.6309E+00 |            |            |            |            |            |            |
| -60        | 0.4988E+02 | 0.5798E-01 | 0.6261E+00 | 0.3419E+02 | 0.6176E-01 | 0.2221E+00 | 0.6087E+02 |
| 0.3284E-01 | 0.6731E+00 |            |            |            |            |            |            |
| -55        | 0.5067E+02 | 0.5424E-01 | 0.6702E+00 | 0.3541E+02 | 0.6589E-01 | 0.3008E+00 | 0.6211E+02 |
| 0.3014E-01 | 0.7120E+00 |            |            |            |            |            |            |
| -50        | 0.5146E+02 | 0.5040E-01 | 0.7112E+00 | 0.3663E+02 | 0.6597E-01 | 0.3813E+00 | 0.6336E+02 |
| 0.2773E-01 | 0.7477E+00 |            |            |            |            |            |            |
| -45        | 0.5225E+02 | 0.4660E-01 | 0.7493E+00 | 0.3784E+02 | 0.6369E-01 | 0.4602E+00 | 0.6461E+02 |
| 0.2546E-01 | 0.7806E+00 |            |            |            |            |            |            |
| -40        | 0.5304E+02 | 0.4250E-01 | 0.7842E+00 | 0.3906E+02 | 0.5962E-01 | 0.5349E+00 | 0.6585E+02 |
| 0.2307E-01 | 0.8105E+00 |            |            |            |            |            |            |
| -35        | 0.5383E+02 | 0.3829E-01 | 0.8158E+00 | 0.4028E+02 | 0.5435E-01 | 0.6037E+00 | 0.6710E+02 |
| 0.2055E-01 | 0.8374E+00 |            |            |            |            |            |            |
| -30        | 0.5462E+02 | 0.3371E-01 | 0.8439E+00 | 0.4150E+02 | 0.4870E-01 | 0.6657E+00 | 0.6835E+02 |
| 0.1814E-01 | 0.8612E+00 |            |            |            |            |            |            |

V2\_Results\_baseline\_Irena\_delay.dat

|            |            |            |            |            |            |            |            |
|------------|------------|------------|------------|------------|------------|------------|------------|
| -25        | 0.5541E+02 | 0.2913E-01 | 0.8684E+00 | 0.4271E+02 | 0.4272E-01 | 0.7206E+00 | 0.6959E+02 |
| 0.1582E-01 | 0.8821E+00 |            |            |            |            |            |            |
| -20        | 0.5620E+02 | 0.2496E-01 | 0.8894E+00 | 0.4393E+02 | 0.3651E-01 | 0.7681E+00 | 0.7084E+02 |
| 0.1374E-01 | 0.9002E+00 |            |            |            |            |            |            |
| -15        | 0.5699E+02 | 0.2166E-01 | 0.9075E+00 | 0.4515E+02 | 0.3067E-01 | 0.8082E+00 | 0.7209E+02 |
| 0.1198E-01 | 0.9160E+00 |            |            |            |            |            |            |
| -10        | 0.5779E+02 | 0.1852E-01 | 0.9231E+00 | 0.4636E+02 | 0.2564E-01 | 0.8417E+00 | 0.7333E+02 |
| 0.1040E-01 | 0.9298E+00 |            |            |            |            |            |            |
| -5         | 0.5858E+02 | 0.1559E-01 | 0.9364E+00 | 0.4758E+02 | 0.2161E-01 | 0.8698E+00 | 0.7458E+02 |
| 0.8825E-02 | 0.9416E+00 |            |            |            |            |            |            |
| 0          | 0.5937E+02 | 0.1301E-01 | 0.9474E+00 | 0.4880E+02 | 0.1811E-01 | 0.8936E+00 | 0.7583E+02 |
| 0.7344E-02 | 0.9515E+00 |            |            |            |            |            |            |
| 5          | 0.6016E+02 | 0.1108E-01 | 0.9568E+00 | 0.5001E+02 | 0.1464E-01 | 0.9131E+00 | 0.7707E+02 |
| 0.6052E-02 | 0.9596E+00 |            |            |            |            |            |            |
| 10         | 0.6095E+02 | 0.9311E-02 | 0.9647E+00 | 0.5123E+02 | 0.1191E-01 | 0.9288E+00 | 0.7832E+02 |
| 0.5179E-02 | 0.9665E+00 |            |            |            |            |            |            |
| 15         | 0.6174E+02 | 0.7748E-02 | 0.9713E+00 | 0.5245E+02 | 0.1016E-01 | 0.9420E+00 | 0.7957E+02 |
| 0.4431E-02 | 0.9723E+00 |            |            |            |            |            |            |
| 20         | 0.6253E+02 | 0.6289E-02 | 0.9767E+00 | 0.5366E+02 | 0.8425E-02 | 0.9531E+00 | 0.8081E+02 |
| 0.3742E-02 | 0.9774E+00 |            |            |            |            |            |            |
| 25         | 0.6332E+02 | 0.5101E-02 | 0.9811E+00 | 0.5488E+02 | 0.6608E-02 | 0.9620E+00 | 0.8206E+02 |
| 0.3048E-02 | 0.9815E+00 |            |            |            |            |            |            |
| 30         | 0.6411E+02 | 0.4171E-02 | 0.9847E+00 | 0.5610E+02 | 0.5344E-02 | 0.9690E+00 | 0.8331E+02 |
| 0.2491E-02 | 0.9849E+00 |            |            |            |            |            |            |
| 35         | 0.6490E+02 | 0.3433E-02 | 0.9876E+00 | 0.5731E+02 | 0.4389E-02 | 0.9748E+00 | 0.8455E+02 |
| 0.2086E-02 | 0.9876E+00 |            |            |            |            |            |            |
| 40         | 0.6569E+02 | 0.2846E-02 | 0.9901E+00 | 0.5853E+02 | 0.3572E-02 | 0.9795E+00 | 0.8580E+02 |
| 0.1736E-02 | 0.9900E+00 |            |            |            |            |            |            |
| 45         | 0.6648E+02 | 0.2331E-02 | 0.9921E+00 | 0.5975E+02 | 0.2864E-02 | 0.9833E+00 | 0.8705E+02 |
| 0.1414E-02 | 0.9919E+00 |            |            |            |            |            |            |
| 50         | 0.6727E+02 | 0.1911E-02 | 0.9937E+00 | 0.6096E+02 | 0.2240E-02 | 0.9864E+00 | 0.8829E+02 |
| 0.1091E-02 | 0.9934E+00 |            |            |            |            |            |            |
| 55         | 0.6807E+02 | 0.1537E-02 | 0.9950E+00 | 0.6218E+02 | 0.1788E-02 | 0.9887E+00 | 0.8954E+02 |
| 0.8691E-03 | 0.9946E+00 |            |            |            |            |            |            |
| 60         | 0.6886E+02 | 0.1192E-02 | 0.9961E+00 | 0.6340E+02 | 0.1592E-02 | 0.9907E+00 | 0.9079E+02 |
| 0.7419E-03 | 0.9956E+00 |            |            |            |            |            |            |

V2\_Results\_baseline\_Irena\_delay.dat

|            |            |            |            |            |            |            |            |
|------------|------------|------------|------------|------------|------------|------------|------------|
| 65         | 0.6965E+02 | 0.9406E-03 | 0.9969E+00 | 0.6462E+02 | 0.1428E-02 | 0.9926E+00 | 0.9203E+02 |
| 0.6381E-03 | 0.9964E+00 |            |            |            |            |            |            |
| 70         | 0.7044E+02 | 0.7794E-03 | 0.9976E+00 | 0.6583E+02 | 0.1119E-02 | 0.9941E+00 | 0.9328E+02 |
| 0.5319E-03 | 0.9971E+00 |            |            |            |            |            |            |
| 75         | 0.7123E+02 | 0.6134E-03 | 0.9981E+00 | 0.6705E+02 | 0.8531E-03 | 0.9953E+00 | 0.9453E+02 |
| 0.4545E-03 | 0.9978E+00 |            |            |            |            |            |            |
| 80         | 0.7202E+02 | 0.4719E-03 | 0.9985E+00 | 0.6827E+02 | 0.6476E-03 | 0.9961E+00 | 0.9577E+02 |
| 0.3726E-03 | 0.9983E+00 |            |            |            |            |            |            |
| 85         | 0.7281E+02 | 0.3487E-03 | 0.9988E+00 | 0.6948E+02 | 0.5033E-03 | 0.9968E+00 | 0.9702E+02 |
| 0.2800E-03 | 0.9987E+00 |            |            |            |            |            |            |
| 90         | 0.7360E+02 | 0.2830E-03 | 0.9991E+00 | 0.7070E+02 | 0.4447E-03 | 0.9974E+00 | 0.9827E+02 |
| 0.2087E-03 | 0.9989E+00 |            |            |            |            |            |            |
| 95         | 0.7439E+02 | 0.2084E-03 | 0.9993E+00 | 0.7192E+02 | 0.3551E-03 | 0.9979E+00 | 0.9951E+02 |
| 0.1752E-03 | 0.9992E+00 |            |            |            |            |            |            |
| 100        | 0.7518E+02 | 0.1733E-03 | 0.9994E+00 | 0.7313E+02 | 0.2929E-03 | 0.9982E+00 | 0.1008E+03 |
| 0.1247E-03 | 0.9994E+00 |            |            |            |            |            |            |
| 105        | 0.7597E+02 | 0.1344E-03 | 0.9995E+00 | 0.7435E+02 | 0.2773E-03 | 0.9986E+00 | 0.1020E+03 |
| 0.7793E-04 | 0.9995E+00 |            |            |            |            |            |            |
| 110        | 0.7676E+02 | 0.1092E-03 | 0.9996E+00 | 0.7557E+02 | 0.1921E-03 | 0.9989E+00 | 0.1033E+03 |
| 0.6127E-04 | 0.9996E+00 |            |            |            |            |            |            |
| 115        | 0.7755E+02 | 0.7237E-04 | 0.9997E+00 | 0.7678E+02 | 0.1365E-03 | 0.9991E+00 | 0.1045E+03 |
| 0.6193E-04 | 0.9996E+00 |            |            |            |            |            |            |
| 120        | 0.7835E+02 | 0.4678E-04 | 0.9997E+00 | 0.7800E+02 | 0.1205E-03 | 0.9992E+00 | 0.1057E+03 |
| 0.5583E-04 | 0.9997E+00 |            |            |            |            |            |            |
| 125        | 0.7914E+02 | 0.4369E-04 | 0.9998E+00 | 0.7922E+02 | 0.9987E-04 | 0.9993E+00 | 0.1070E+03 |
| 0.4257E-04 | 0.9998E+00 |            |            |            |            |            |            |
| 130        | 0.7993E+02 | 0.5178E-04 | 0.9998E+00 | 0.8043E+02 | 0.9063E-04 | 0.9995E+00 | 0.1082E+03 |
| 0.2869E-04 | 0.9998E+00 |            |            |            |            |            |            |
| 135        | 0.8072E+02 | 0.4876E-04 | 0.9998E+00 | 0.8165E+02 | 0.7167E-04 | 0.9995E+00 | 0.1095E+03 |
| 0.1585E-04 | 0.9998E+00 |            |            |            |            |            |            |
| 140        | 0.8151E+02 | 0.3284E-04 | 0.9999E+00 | 0.8287E+02 | 0.6086E-04 | 0.9996E+00 | 0.1107E+03 |
| 0.1162E-04 | 0.9999E+00 |            |            |            |            |            |            |
| 145        | 0.8230E+02 | 0.2563E-04 | 0.9999E+00 | 0.8409E+02 | 0.5931E-04 | 0.9997E+00 | 0.1120E+03 |
| 0.1469E-04 | 0.9999E+00 |            |            |            |            |            |            |
| 150        | 0.8309E+02 | 0.1653E-04 | 0.9999E+00 | 0.8530E+02 | 0.4615E-04 | 0.9998E+00 | 0.1132E+03 |
| 0.2076E-04 | 0.9999E+00 |            |            |            |            |            |            |

V2\_Results\_baseline\_Irena\_delay.dat

|            |            |            |            |            |            |            |            |
|------------|------------|------------|------------|------------|------------|------------|------------|
| 155        | 0.8388E+02 | 0.9759E-05 | 0.9999E+00 | 0.8652E+02 | 0.3171E-04 | 0.9998E+00 | 0.1145E+03 |
| 0.1782E-04 | 0.9999E+00 |            |            |            |            |            |            |
| 160        | 0.8467E+02 | 0.5459E-05 | 0.9999E+00 | 0.8774E+02 | 0.2801E-04 | 0.9998E+00 | 0.1157E+03 |
| 0.1207E-04 | 0.9999E+00 |            |            |            |            |            |            |
| 165        | 0.8546E+02 | 0.4799E-05 | 0.9999E+00 | 0.8895E+02 | 0.1890E-04 | 0.9999E+00 | 0.1170E+03 |
| 0.8669E-05 | 0.1000E+01 |            |            |            |            |            |            |
| 170        | 0.8625E+02 | 0.1153E-04 | 0.9999E+00 | 0.9017E+02 | 0.1951E-04 | 0.9999E+00 | 0.1182E+03 |
| 0.6649E-05 | 0.1000E+01 |            |            |            |            |            |            |
| 175        | 0.8704E+02 | 0.1633E-04 | 0.1000E+01 | 0.9139E+02 | 0.2097E-04 | 0.9999E+00 | 0.1195E+03 |
| 0.5288E-05 | 0.1000E+01 |            |            |            |            |            |            |
| 180        | 0.8783E+02 | 0.1595E-04 | 0.1000E+01 | 0.9260E+02 | 0.1557E-04 | 0.9999E+00 | 0.1207E+03 |
| 0.5893E-05 | 0.1000E+01 |            |            |            |            |            |            |
| 185        | 0.8863E+02 | 0.1017E-04 | 0.1000E+01 | 0.9382E+02 | 0.1220E-04 | 0.1000E+01 | 0.1220E+03 |
| 0.7331E-05 | 0.1000E+01 |            |            |            |            |            |            |
| 190        | 0.8942E+02 | 0.1007E-04 | 0.1000E+01 | 0.9504E+02 | 0.1273E-04 | 0.1000E+01 | 0.1232E+03 |
| 0.5547E-05 | 0.1000E+01 |            |            |            |            |            |            |
| 195        | 0.9021E+02 | 0.1010E-04 | 0.1000E+01 | 0.9625E+02 | 0.1042E-04 | 0.1000E+01 | 0.1244E+03 |
| 0.4265E-05 | 0.1000E+01 |            |            |            |            |            |            |
| 200        | 0.9100E+02 | 0.8878E-05 | 0.1000E+01 | 0.9747E+02 | 0.7525E-05 | 0.1000E+01 | 0.1257E+03 |
| 0.3035E-05 | 0.1000E+01 |            |            |            |            |            |            |

| #    | *****       | Standardised | *****       |            |             |            |
|------|-------------|--------------|-------------|------------|-------------|------------|
| -200 | -0.3291E+01 | 0.4272E-04   | -0.2029E+01 | 0.1300E-02 | -0.3002E+01 | 0.1204E-03 |
| -195 | -0.3166E+01 | 0.1205E-03   | -0.1903E+01 | 0.5123E-02 | -0.2883E+01 | 0.2714E-03 |
| -190 | -0.3040E+01 | 0.2760E-03   | -0.1778E+01 | 0.1775E-01 | -0.2763E+01 | 0.6908E-03 |
| -185 | -0.2914E+01 | 0.4102E-03   | -0.1652E+01 | 0.4446E-01 | -0.2643E+01 | 0.1544E-02 |
| -180 | -0.2789E+01 | 0.8002E-03   | -0.1527E+01 | 0.8736E-01 | -0.2523E+01 | 0.3557E-02 |
| -175 | -0.2663E+01 | 0.1733E-02   | -0.1401E+01 | 0.1452E+00 | -0.2403E+01 | 0.6546E-02 |
| -170 | -0.2537E+01 | 0.3614E-02   | -0.1275E+01 | 0.2146E+00 | -0.2283E+01 | 0.1134E-01 |
| -165 | -0.2412E+01 | 0.6516E-02   | -0.1150E+01 | 0.2841E+00 | -0.2163E+01 | 0.1869E-01 |
| -160 | -0.2286E+01 | 0.1186E-01   | -0.1024E+01 | 0.3489E+00 | -0.2044E+01 | 0.2936E-01 |
| -155 | -0.2160E+01 | 0.2020E-01   | -0.8985E+00 | 0.4059E+00 | -0.1924E+01 | 0.4445E-01 |
| -150 | -0.2035E+01 | 0.3277E-01   | -0.7730E+00 | 0.4491E+00 | -0.1804E+01 | 0.6357E-01 |
| -145 | -0.1909E+01 | 0.4872E-01   | -0.6474E+00 | 0.4716E+00 | -0.1684E+01 | 0.8839E-01 |
| -140 | -0.1783E+01 | 0.6871E-01   | -0.5218E+00 | 0.4763E+00 | -0.1564E+01 | 0.1164E+00 |

V2\_Results\_baseline\_Irena\_delay.dat

|      |             |            |             |            |             |            |
|------|-------------|------------|-------------|------------|-------------|------------|
| -135 | -0.1658E+01 | 0.9482E-01 | -0.3962E+00 | 0.4706E+00 | -0.1444E+01 | 0.1504E+00 |
| -130 | -0.1532E+01 | 0.1282E+00 | -0.2706E+00 | 0.4560E+00 | -0.1324E+01 | 0.1885E+00 |
| -125 | -0.1406E+01 | 0.1655E+00 | -0.1450E+00 | 0.4345E+00 | -0.1205E+01 | 0.2309E+00 |
| -120 | -0.1281E+01 | 0.2021E+00 | -0.1940E-01 | 0.4080E+00 | -0.1085E+01 | 0.2707E+00 |
| -115 | -0.1155E+01 | 0.2412E+00 | 0.1062E+00  | 0.3788E+00 | -0.9649E+00 | 0.3072E+00 |
| -110 | -0.1029E+01 | 0.2820E+00 | 0.2318E+00  | 0.3480E+00 | -0.8450E+00 | 0.3384E+00 |
| -105 | -0.9038E+00 | 0.3212E+00 | 0.3574E+00  | 0.3157E+00 | -0.7251E+00 | 0.3655E+00 |
| -100 | -0.7782E+00 | 0.3509E+00 | 0.4830E+00  | 0.2835E+00 | -0.6053E+00 | 0.3835E+00 |
| -95  | -0.6525E+00 | 0.3734E+00 | 0.6086E+00  | 0.2505E+00 | -0.4854E+00 | 0.3967E+00 |
| -90  | -0.5268E+00 | 0.3913E+00 | 0.7342E+00  | 0.2199E+00 | -0.3656E+00 | 0.4096E+00 |
| -85  | -0.4012E+00 | 0.4054E+00 | 0.8598E+00  | 0.1921E+00 | -0.2457E+00 | 0.4172E+00 |
| -80  | -0.2755E+00 | 0.4099E+00 | 0.9853E+00  | 0.1688E+00 | -0.1259E+00 | 0.4140E+00 |
| -75  | -0.1499E+00 | 0.4094E+00 | 0.1111E+01  | 0.1492E+00 | -0.6008E-02 | 0.3997E+00 |
| -70  | -0.2422E-01 | 0.4026E+00 | 0.1237E+01  | 0.1307E+00 | 0.1138E+00  | 0.3847E+00 |
| -65  | 0.1014E+00  | 0.3885E+00 | 0.1362E+01  | 0.1120E+00 | 0.2337E+00  | 0.3656E+00 |
| -60  | 0.2271E+00  | 0.3649E+00 | 0.1488E+01  | 0.9522E-01 | 0.3536E+00  | 0.3416E+00 |
| -55  | 0.3527E+00  | 0.3414E+00 | 0.1613E+01  | 0.8263E-01 | 0.4734E+00  | 0.3135E+00 |
| -50  | 0.4784E+00  | 0.3172E+00 | 0.1739E+01  | 0.7365E-01 | 0.5933E+00  | 0.2884E+00 |
| -45  | 0.6041E+00  | 0.2933E+00 | 0.1864E+01  | 0.6454E-01 | 0.7131E+00  | 0.2648E+00 |
| -40  | 0.7297E+00  | 0.2675E+00 | 0.1990E+01  | 0.5477E-01 | 0.8330E+00  | 0.2400E+00 |
| -35  | 0.8554E+00  | 0.2410E+00 | 0.2116E+01  | 0.4562E-01 | 0.9528E+00  | 0.2138E+00 |
| -30  | 0.9810E+00  | 0.2122E+00 | 0.2241E+01  | 0.3905E-01 | 0.1073E+01  | 0.1887E+00 |
| -25  | 0.1107E+01  | 0.1833E+00 | 0.2367E+01  | 0.3369E-01 | 0.1193E+01  | 0.1645E+00 |
| -20  | 0.1232E+01  | 0.1570E+00 | 0.2492E+01  | 0.2901E-01 | 0.1312E+01  | 0.1429E+00 |
| -15  | 0.1358E+01  | 0.1363E+00 | 0.2618E+01  | 0.2495E-01 | 0.1432E+01  | 0.1246E+00 |
| -10  | 0.1484E+01  | 0.1166E+00 | 0.2744E+01  | 0.2119E-01 | 0.1552E+01  | 0.1082E+00 |
| -5   | 0.1609E+01  | 0.9814E-01 | 0.2869E+01  | 0.1770E-01 | 0.1672E+01  | 0.9178E-01 |
| 0    | 0.1735E+01  | 0.8187E-01 | 0.2995E+01  | 0.1464E-01 | 0.1792E+01  | 0.7638E-01 |
| 5    | 0.1861E+01  | 0.6970E-01 | 0.3120E+01  | 0.1266E-01 | 0.1912E+01  | 0.6295E-01 |
| 10   | 0.1986E+01  | 0.5859E-01 | 0.3246E+01  | 0.1160E-01 | 0.2032E+01  | 0.5386E-01 |
| 15   | 0.2112E+01  | 0.4876E-01 | 0.3372E+01  | 0.1088E-01 | 0.2151E+01  | 0.4608E-01 |
| 20   | 0.2238E+01  | 0.3958E-01 | 0.3497E+01  | 0.9614E-02 | 0.2271E+01  | 0.3892E-01 |
| 25   | 0.2363E+01  | 0.3210E-01 | 0.3623E+01  | 0.7911E-02 | 0.2391E+01  | 0.3170E-01 |
| 30   | 0.2489E+01  | 0.2625E-01 | 0.3748E+01  | 0.6468E-02 | 0.2511E+01  | 0.2591E-01 |
| 35   | 0.2615E+01  | 0.2161E-01 | 0.3874E+01  | 0.5218E-02 | 0.2631E+01  | 0.2170E-01 |
| 40   | 0.2740E+01  | 0.1791E-01 | 0.4000E+01  | 0.4224E-02 | 0.2751E+01  | 0.1806E-01 |

V2\_Results\_baseline\_Irena\_delay.dat

|     |            |            |            |            |            |            |
|-----|------------|------------|------------|------------|------------|------------|
| 45  | 0.2866E+01 | 0.1467E-01 | 0.4125E+01 | 0.3606E-02 | 0.2871E+01 | 0.1471E-01 |
| 50  | 0.2992E+01 | 0.1203E-01 | 0.4251E+01 | 0.3359E-02 | 0.2990E+01 | 0.1135E-01 |
| 55  | 0.3117E+01 | 0.9674E-02 | 0.4376E+01 | 0.2860E-02 | 0.3110E+01 | 0.9039E-02 |
| 60  | 0.3243E+01 | 0.7502E-02 | 0.4502E+01 | 0.2383E-02 | 0.3230E+01 | 0.7716E-02 |
| 65  | 0.3368E+01 | 0.5919E-02 | 0.4628E+01 | 0.2104E-02 | 0.3350E+01 | 0.6637E-02 |
| 70  | 0.3494E+01 | 0.4905E-02 | 0.4753E+01 | 0.2107E-02 | 0.3470E+01 | 0.5532E-02 |
| 75  | 0.3620E+01 | 0.3860E-02 | 0.4879E+01 | 0.1707E-02 | 0.3590E+01 | 0.4728E-02 |
| 80  | 0.3745E+01 | 0.2969E-02 | 0.5004E+01 | 0.1236E-02 | 0.3710E+01 | 0.3876E-02 |
| 85  | 0.3871E+01 | 0.2194E-02 | 0.5130E+01 | 0.9806E-03 | 0.3829E+01 | 0.2912E-02 |
| 90  | 0.3997E+01 | 0.1781E-02 | 0.5255E+01 | 0.9141E-03 | 0.3949E+01 | 0.2171E-02 |
| 95  | 0.4122E+01 | 0.1311E-02 | 0.5381E+01 | 0.8269E-03 | 0.4069E+01 | 0.1822E-02 |
| 100 | 0.4248E+01 | 0.1091E-02 | 0.5507E+01 | 0.6817E-03 | 0.4189E+01 | 0.1297E-02 |
| 105 | 0.4374E+01 | 0.8457E-03 | 0.5632E+01 | 0.6544E-03 | 0.4309E+01 | 0.8106E-03 |
| 110 | 0.4499E+01 | 0.6874E-03 | 0.5758E+01 | 0.5462E-03 | 0.4429E+01 | 0.6373E-03 |
| 115 | 0.4625E+01 | 0.4554E-03 | 0.5883E+01 | 0.4941E-03 | 0.4549E+01 | 0.6441E-03 |
| 120 | 0.4751E+01 | 0.2944E-03 | 0.6009E+01 | 0.4300E-03 | 0.4668E+01 | 0.5807E-03 |
| 125 | 0.4876E+01 | 0.2750E-03 | 0.6135E+01 | 0.4312E-03 | 0.4788E+01 | 0.4427E-03 |
| 130 | 0.5002E+01 | 0.3259E-03 | 0.6260E+01 | 0.3640E-03 | 0.4908E+01 | 0.2984E-03 |
| 135 | 0.5128E+01 | 0.3068E-03 | 0.6386E+01 | 0.2981E-03 | 0.5028E+01 | 0.1648E-03 |
| 140 | 0.5253E+01 | 0.2067E-03 | 0.6511E+01 | 0.2214E-03 | 0.5148E+01 | 0.1209E-03 |
| 145 | 0.5379E+01 | 0.1613E-03 | 0.6637E+01 | 0.2108E-03 | 0.5268E+01 | 0.1528E-03 |
| 150 | 0.5505E+01 | 0.1040E-03 | 0.6763E+01 | 0.1594E-03 | 0.5388E+01 | 0.2159E-03 |
| 155 | 0.5630E+01 | 0.6141E-04 | 0.6888E+01 | 0.1495E-03 | 0.5507E+01 | 0.1853E-03 |
| 160 | 0.5756E+01 | 0.3435E-04 | 0.7014E+01 | 0.1400E-03 | 0.5627E+01 | 0.1255E-03 |
| 165 | 0.5882E+01 | 0.3020E-04 | 0.7139E+01 | 0.1525E-03 | 0.5747E+01 | 0.9016E-04 |
| 170 | 0.6007E+01 | 0.7253E-04 | 0.7265E+01 | 0.1293E-03 | 0.5867E+01 | 0.6915E-04 |
| 175 | 0.6133E+01 | 0.1027E-03 | 0.7391E+01 | 0.1146E-03 | 0.5987E+01 | 0.5500E-04 |
| 180 | 0.6259E+01 | 0.1004E-03 | 0.7516E+01 | 0.8535E-04 | 0.6107E+01 | 0.6129E-04 |
| 185 | 0.6384E+01 | 0.6401E-04 | 0.7642E+01 | 0.8477E-04 | 0.6227E+01 | 0.7625E-04 |
| 190 | 0.6510E+01 | 0.6337E-04 | 0.7767E+01 | 0.8357E-04 | 0.6346E+01 | 0.5769E-04 |
| 195 | 0.6636E+01 | 0.6358E-04 | 0.7893E+01 | 0.7888E-04 | 0.6466E+01 | 0.4436E-04 |
| 200 | 0.6761E+01 | 0.5587E-04 | 0.8019E+01 | 0.5224E-04 | 0.6586E+01 | 0.3156E-04 |

\*\*\*\*\*  
 #\*\*\* p.d.f. LCE (US\$/MWh): TOTAL 2020, 2030, 2040 ,2050 (Smoothed, Not standardised) \*\*\*

# V2\_Results\_baseline\_Irena\_delay.dat

```

#*****
#
#          2020          2030          2040          2050
#
#  *****      NOT standardised      *****
#
# -200  0.7088E+02  0.7276E-05  0.5051E+02  0.2305E-05  0.2373E+02  0.1237E-04  0.2113E+02
# 0.2672E-04
# -195  0.7268E+02  0.1398E-04  0.5217E+02  0.3925E-05  0.2473E+02  0.1672E-04  0.2197E+02
# 0.8355E-04
# -190  0.7447E+02  0.2984E-04  0.5383E+02  0.8790E-05  0.2573E+02  0.3908E-04  0.2282E+02
# 0.2008E-03
# -185  0.7627E+02  0.7400E-04  0.5549E+02  0.2256E-04  0.2673E+02  0.1350E-03  0.2367E+02
# 0.4473E-03
# -180  0.7807E+02  0.1662E-03  0.5715E+02  0.5486E-04  0.2773E+02  0.3836E-03  0.2451E+02
# 0.9274E-03
# -175  0.7987E+02  0.3543E-03  0.5881E+02  0.1327E-03  0.2873E+02  0.8228E-03  0.2536E+02
# 0.1818E-02
# -170  0.8167E+02  0.7041E-03  0.6046E+02  0.2640E-03  0.2973E+02  0.1718E-02  0.2621E+02
# 0.3555E-02
# -165  0.8347E+02  0.1318E-02  0.6212E+02  0.4949E-03  0.3073E+02  0.3402E-02  0.2706E+02
# 0.6266E-02
# -160  0.8526E+02  0.2170E-02  0.6378E+02  0.8662E-03  0.3174E+02  0.5945E-02  0.2790E+02
# 0.9912E-02
# -155  0.8706E+02  0.3373E-02  0.6544E+02  0.1462E-02  0.3274E+02  0.9397E-02  0.2875E+02
# 0.1498E-01
# -150  0.8886E+02  0.4976E-02  0.6710E+02  0.2304E-02  0.3374E+02  0.1388E-01  0.2960E+02
# 0.2119E-01
# -145  0.9066E+02  0.7115E-02  0.6876E+02  0.3517E-02  0.3474E+02  0.2016E-01  0.3044E+02
# 0.2824E-01
# -140  0.9246E+02  0.9635E-02  0.7042E+02  0.5106E-02  0.3574E+02  0.2743E-01  0.3129E+02
# 0.3588E-01
# -135  0.9425E+02  0.1249E-01  0.7208E+02  0.6963E-02  0.3674E+02  0.3492E-01  0.3214E+02
# 0.4355E-01
# -130  0.9605E+02  0.1561E-01  0.7374E+02  0.9059E-02  0.3774E+02  0.4173E-01  0.3298E+02
# 0.5064E-01
# -125  0.9785E+02  0.1899E-01  0.7540E+02  0.1156E-01  0.3874E+02  0.4783E-01  0.3383E+02

```

V2\_Results\_baseline\_Irena\_delay.dat

|            |            |            |            |            |            |            |            |
|------------|------------|------------|------------|------------|------------|------------|------------|
| 0.5694E-01 |            |            |            |            |            |            |            |
| -120       | 0.9965E+02 | 0.2213E-01 | 0.7705E+02 | 0.1438E-01 | 0.3974E+02 | 0.5304E-01 | 0.3468E+02 |
| 0.6187E-01 |            |            |            |            |            |            |            |
| -115       | 0.1014E+03 | 0.2470E-01 | 0.7871E+02 | 0.1740E-01 | 0.4074E+02 | 0.5735E-01 | 0.3552E+02 |
| 0.6477E-01 |            |            |            |            |            |            |            |
| -110       | 0.1032E+03 | 0.2671E-01 | 0.8037E+02 | 0.2031E-01 | 0.4174E+02 | 0.6021E-01 | 0.3637E+02 |
| 0.6675E-01 |            |            |            |            |            |            |            |
| -105       | 0.1050E+03 | 0.2838E-01 | 0.8203E+02 | 0.2281E-01 | 0.4275E+02 | 0.6130E-01 | 0.3722E+02 |
| 0.6782E-01 |            |            |            |            |            |            |            |
| -100       | 0.1068E+03 | 0.2985E-01 | 0.8369E+02 | 0.2499E-01 | 0.4375E+02 | 0.6092E-01 | 0.3807E+02 |
| 0.6731E-01 |            |            |            |            |            |            |            |
| -95        | 0.1086E+03 | 0.3068E-01 | 0.8535E+02 | 0.2700E-01 | 0.4475E+02 | 0.5861E-01 | 0.3891E+02 |
| 0.6527E-01 |            |            |            |            |            |            |            |
| -90        | 0.1104E+03 | 0.3065E-01 | 0.8701E+02 | 0.2867E-01 | 0.4575E+02 | 0.5515E-01 | 0.3976E+02 |
| 0.6226E-01 |            |            |            |            |            |            |            |
| -85        | 0.1122E+03 | 0.2990E-01 | 0.8867E+02 | 0.2977E-01 | 0.4675E+02 | 0.5153E-01 | 0.4061E+02 |
| 0.5775E-01 |            |            |            |            |            |            |            |
| -80        | 0.1140E+03 | 0.2865E-01 | 0.9033E+02 | 0.3055E-01 | 0.4775E+02 | 0.4792E-01 | 0.4145E+02 |
| 0.5275E-01 |            |            |            |            |            |            |            |
| -75        | 0.1158E+03 | 0.2694E-01 | 0.9199E+02 | 0.3074E-01 | 0.4875E+02 | 0.4308E-01 | 0.4230E+02 |
| 0.4759E-01 |            |            |            |            |            |            |            |
| -70        | 0.1176E+03 | 0.2521E-01 | 0.9364E+02 | 0.3009E-01 | 0.4975E+02 | 0.3788E-01 | 0.4315E+02 |
| 0.4297E-01 |            |            |            |            |            |            |            |
| -65        | 0.1194E+03 | 0.2333E-01 | 0.9530E+02 | 0.2878E-01 | 0.5075E+02 | 0.3274E-01 | 0.4399E+02 |
| 0.3792E-01 |            |            |            |            |            |            |            |
| -60        | 0.1212E+03 | 0.2129E-01 | 0.9696E+02 | 0.2733E-01 | 0.5175E+02 | 0.2829E-01 | 0.4484E+02 |
| 0.3302E-01 |            |            |            |            |            |            |            |
| -55        | 0.1230E+03 | 0.1904E-01 | 0.9862E+02 | 0.2589E-01 | 0.5275E+02 | 0.2453E-01 | 0.4569E+02 |
| 0.2901E-01 |            |            |            |            |            |            |            |
| -50        | 0.1248E+03 | 0.1697E-01 | 0.1003E+03 | 0.2430E-01 | 0.5376E+02 | 0.2085E-01 | 0.4653E+02 |
| 0.2498E-01 |            |            |            |            |            |            |            |
| -45        | 0.1266E+03 | 0.1502E-01 | 0.1019E+03 | 0.2246E-01 | 0.5476E+02 | 0.1752E-01 | 0.4738E+02 |
| 0.2115E-01 |            |            |            |            |            |            |            |
| -40        | 0.1284E+03 | 0.1322E-01 | 0.1036E+03 | 0.2033E-01 | 0.5576E+02 | 0.1497E-01 | 0.4823E+02 |
| 0.1786E-01 |            |            |            |            |            |            |            |
| -35        | 0.1302E+03 | 0.1136E-01 | 0.1053E+03 | 0.1824E-01 | 0.5676E+02 | 0.1249E-01 | 0.4908E+02 |

V2\_Results\_baseline\_Irena\_delay.dat

|            |     |            |            |            |            |            |            |            |
|------------|-----|------------|------------|------------|------------|------------|------------|------------|
| 0.1499E-01 | -30 | 0.1320E+03 | 0.9611E-02 | 0.1069E+03 | 0.1638E-01 | 0.5776E+02 | 0.1010E-01 | 0.4992E+02 |
| 0.1267E-01 | -25 | 0.1338E+03 | 0.8048E-02 | 0.1086E+03 | 0.1469E-01 | 0.5876E+02 | 0.8196E-02 | 0.5077E+02 |
| 0.1063E-01 | -20 | 0.1356E+03 | 0.6864E-02 | 0.1102E+03 | 0.1312E-01 | 0.5976E+02 | 0.6732E-02 | 0.5162E+02 |
| 0.8672E-02 | -15 | 0.1374E+03 | 0.5820E-02 | 0.1119E+03 | 0.1147E-01 | 0.6076E+02 | 0.5439E-02 | 0.5246E+02 |
| 0.6796E-02 | -10 | 0.1392E+03 | 0.4832E-02 | 0.1136E+03 | 0.9857E-02 | 0.6176E+02 | 0.4239E-02 | 0.5331E+02 |
| 0.5642E-02 | -5  | 0.1410E+03 | 0.3894E-02 | 0.1152E+03 | 0.8340E-02 | 0.6276E+02 | 0.3620E-02 | 0.5416E+02 |
| 0.4823E-02 | 0   | 0.1428E+03 | 0.3165E-02 | 0.1169E+03 | 0.7059E-02 | 0.6376E+02 | 0.3008E-02 | 0.5500E+02 |
| 0.3993E-02 | 5   | 0.1446E+03 | 0.2564E-02 | 0.1185E+03 | 0.5955E-02 | 0.6477E+02 | 0.2277E-02 | 0.5585E+02 |
| 0.3163E-02 | 10  | 0.1464E+03 | 0.2063E-02 | 0.1202E+03 | 0.5083E-02 | 0.6577E+02 | 0.1771E-02 | 0.5670E+02 |
| 0.2485E-02 | 15  | 0.1482E+03 | 0.1685E-02 | 0.1218E+03 | 0.4382E-02 | 0.6677E+02 | 0.1508E-02 | 0.5754E+02 |
| 0.2014E-02 | 20  | 0.1500E+03 | 0.1359E-02 | 0.1235E+03 | 0.3817E-02 | 0.6777E+02 | 0.1273E-02 | 0.5839E+02 |
| 0.1706E-02 | 25  | 0.1518E+03 | 0.1082E-02 | 0.1252E+03 | 0.3174E-02 | 0.6877E+02 | 0.1007E-02 | 0.5924E+02 |
| 0.1420E-02 | 30  | 0.1536E+03 | 0.8430E-03 | 0.1268E+03 | 0.2565E-02 | 0.6977E+02 | 0.7285E-03 | 0.6009E+02 |
| 0.1078E-02 | 35  | 0.1554E+03 | 0.6774E-03 | 0.1285E+03 | 0.2082E-02 | 0.7077E+02 | 0.5683E-03 | 0.6093E+02 |
| 0.9073E-03 | 40  | 0.1572E+03 | 0.5634E-03 | 0.1301E+03 | 0.1753E-02 | 0.7177E+02 | 0.4836E-03 | 0.6178E+02 |
| 0.7801E-03 | 45  | 0.1590E+03 | 0.4403E-03 | 0.1318E+03 | 0.1425E-02 | 0.7277E+02 | 0.3700E-03 | 0.6263E+02 |
| 0.5993E-03 | 50  | 0.1608E+03 | 0.3268E-03 | 0.1335E+03 | 0.1125E-02 | 0.7377E+02 | 0.2892E-03 | 0.6347E+02 |
| 0.4381E-03 | 55  | 0.1626E+03 | 0.2463E-03 | 0.1351E+03 | 0.8893E-03 | 0.7477E+02 | 0.2330E-03 | 0.6432E+02 |

V2\_Results\_baseline\_Irena\_delay.dat

|            |     |            |            |            |            |            |            |            |
|------------|-----|------------|------------|------------|------------|------------|------------|------------|
| 0.3755E-03 | 60  | 0.1644E+03 | 0.2101E-03 | 0.1368E+03 | 0.7147E-03 | 0.7578E+02 | 0.1826E-03 | 0.6517E+02 |
| 0.3332E-03 | 65  | 0.1662E+03 | 0.1775E-03 | 0.1384E+03 | 0.5645E-03 | 0.7678E+02 | 0.1185E-03 | 0.6601E+02 |
| 0.2633E-03 | 70  | 0.1680E+03 | 0.1575E-03 | 0.1401E+03 | 0.4616E-03 | 0.7778E+02 | 0.7690E-04 | 0.6686E+02 |
| 0.1897E-03 | 75  | 0.1698E+03 | 0.1271E-03 | 0.1418E+03 | 0.3712E-03 | 0.7878E+02 | 0.8780E-04 | 0.6771E+02 |
| 0.1728E-03 | 80  | 0.1716E+03 | 0.9997E-04 | 0.1434E+03 | 0.3080E-03 | 0.7978E+02 | 0.9900E-04 | 0.6856E+02 |
| 0.1647E-03 | 85  | 0.1734E+03 | 0.6741E-04 | 0.1451E+03 | 0.2749E-03 | 0.8078E+02 | 0.8247E-04 | 0.6940E+02 |
| 0.1251E-03 | 90  | 0.1752E+03 | 0.4008E-04 | 0.1467E+03 | 0.2423E-03 | 0.8178E+02 | 0.5407E-04 | 0.7025E+02 |
| 0.9325E-04 | 95  | 0.1770E+03 | 0.2719E-04 | 0.1484E+03 | 0.2019E-03 | 0.8278E+02 | 0.2739E-04 | 0.7110E+02 |
| 0.6057E-04 | 100 | 0.1788E+03 | 0.2372E-04 | 0.1501E+03 | 0.1505E-03 | 0.8378E+02 | 0.3215E-04 | 0.7194E+02 |
| 0.4549E-04 | 105 | 0.1806E+03 | 0.2057E-04 | 0.1517E+03 | 0.1141E-03 | 0.8478E+02 | 0.3250E-04 | 0.7279E+02 |
| 0.4773E-04 | 110 | 0.1824E+03 | 0.8633E-05 | 0.1534E+03 | 0.9813E-04 | 0.8578E+02 | 0.2626E-04 | 0.7364E+02 |
| 0.4370E-04 | 115 | 0.1842E+03 | 0.2624E-05 | 0.1550E+03 | 0.8410E-04 | 0.8679E+02 | 0.2222E-04 | 0.7448E+02 |
| 0.4480E-04 | 120 | 0.1860E+03 | 0.8135E-05 | 0.1567E+03 | 0.6490E-04 | 0.8779E+02 | 0.2821E-04 | 0.7533E+02 |
| 0.4359E-04 | 125 | 0.1878E+03 | 0.8777E-05 | 0.1583E+03 | 0.5254E-04 | 0.8879E+02 | 0.2668E-04 | 0.7618E+02 |
| 0.4144E-04 | 130 | 0.1896E+03 | 0.5504E-05 | 0.1600E+03 | 0.3995E-04 | 0.8979E+02 | 0.2241E-04 | 0.7702E+02 |
| 0.2459E-04 | 135 | 0.1914E+03 | 0.7007E-05 | 0.1617E+03 | 0.3066E-04 | 0.9079E+02 | 0.1906E-04 | 0.7787E+02 |
| 0.1512E-04 | 140 | 0.1932E+03 | 0.1008E-04 | 0.1633E+03 | 0.2086E-04 | 0.9179E+02 | 0.1549E-04 | 0.7872E+02 |
| 0.9956E-05 | 145 | 0.1950E+03 | 0.7037E-05 | 0.1650E+03 | 0.1225E-04 | 0.9279E+02 | 0.1067E-04 | 0.7957E+02 |

# V2\_Results\_baseline\_Irena\_delay.dat

```

0.5586E-05
 150  0.1968E+03  0.1599E-05  0.1666E+03  0.7574E-05  0.9379E+02  0.2872E-05  0.8041E+02
0.0000E+00
 155  0.1986E+03  0.0000E+00  0.1683E+03  0.6601E-05  0.9479E+02  0.0000E+00  0.8126E+02
0.3756E-05
 160  0.2003E+03  0.0000E+00  0.1700E+03  0.5237E-05  0.9579E+02  0.0000E+00  0.8211E+02
0.1302E-04
 165  0.2021E+03  0.0000E+00  0.1716E+03  0.5466E-05  0.9679E+02  0.0000E+00  0.8295E+02
0.2386E-04
 170  0.2039E+03  0.0000E+00  0.1733E+03  0.6723E-05  0.9780E+02  0.0000E+00  0.8380E+02
0.2426E-04
 175  0.2057E+03  0.0000E+00  0.1749E+03  0.6064E-05  0.9880E+02  0.0000E+00  0.8465E+02
0.1361E-04
 180  0.2075E+03  0.0000E+00  0.1766E+03  0.2850E-05  0.9980E+02  0.0000E+00  0.8549E+02
0.4349E-05
 185  0.2093E+03  0.0000E+00  0.1783E+03  0.2198E-05  0.1008E+03  0.0000E+00  0.8634E+02
0.2856E-05
 190  0.2111E+03  0.0000E+00  0.1799E+03  0.2118E-05  0.1018E+03  0.0000E+00  0.8719E+02
0.5024E-05
 195  0.2129E+03  0.1450E-05  0.1816E+03  0.2409E-05  0.1028E+03  0.2522E-05  0.8803E+02
0.6941E-05
 200  0.2147E+03  0.2325E-05  0.1832E+03  0.2305E-05  0.1038E+03  0.4528E-05  0.8888E+02
0.5048E-05

```

# \*\*\*\*\* adaptados para un plot en 3D con gnuplot \*\*\*\*\*

```

0.7088E+02  0.7276E-05  0.2020E+04  0xff0000
0.7268E+02  0.1398E-04  0.2020E+04  0xff0000
0.7447E+02  0.2984E-04  0.2020E+04  0xff0000
0.7627E+02  0.7400E-04  0.2020E+04  0xff0000
0.7807E+02  0.1662E-03  0.2020E+04  0xff0000
0.7987E+02  0.3543E-03  0.2020E+04  0xff0000
0.8167E+02  0.7041E-03  0.2020E+04  0xff0000
0.8347E+02  0.1318E-02  0.2020E+04  0xff0000
0.8526E+02  0.2170E-02  0.2020E+04  0xff0000
0.8706E+02  0.3373E-02  0.2020E+04  0xff0000

```

V2\_Results\_baseline\_Irena\_delay.dat

|            |            |            |          |
|------------|------------|------------|----------|
| 0.8886E+02 | 0.4976E-02 | 0.2020E+04 | 0xff0000 |
| 0.9066E+02 | 0.7115E-02 | 0.2020E+04 | 0xff0000 |
| 0.9246E+02 | 0.9635E-02 | 0.2020E+04 | 0xff0000 |
| 0.9425E+02 | 0.1249E-01 | 0.2020E+04 | 0xff0000 |
| 0.9605E+02 | 0.1561E-01 | 0.2020E+04 | 0xff0000 |
| 0.9785E+02 | 0.1899E-01 | 0.2020E+04 | 0xff0000 |
| 0.9965E+02 | 0.2213E-01 | 0.2020E+04 | 0xff0000 |
| 0.1014E+03 | 0.2470E-01 | 0.2020E+04 | 0xff0000 |
| 0.1032E+03 | 0.2671E-01 | 0.2020E+04 | 0xff0000 |
| 0.1050E+03 | 0.2838E-01 | 0.2020E+04 | 0xff0000 |
| 0.1068E+03 | 0.2985E-01 | 0.2020E+04 | 0xff0000 |
| 0.1086E+03 | 0.3068E-01 | 0.2020E+04 | 0xff0000 |
| 0.1104E+03 | 0.3065E-01 | 0.2020E+04 | 0xff0000 |
| 0.1122E+03 | 0.2990E-01 | 0.2020E+04 | 0xff0000 |
| 0.1140E+03 | 0.2865E-01 | 0.2020E+04 | 0xff0000 |
| 0.1158E+03 | 0.2694E-01 | 0.2020E+04 | 0xff0000 |
| 0.1176E+03 | 0.2521E-01 | 0.2020E+04 | 0xff0000 |
| 0.1194E+03 | 0.2333E-01 | 0.2020E+04 | 0xff0000 |
| 0.1212E+03 | 0.2129E-01 | 0.2020E+04 | 0xff0000 |
| 0.1230E+03 | 0.1904E-01 | 0.2020E+04 | 0xff0000 |
| 0.1248E+03 | 0.1697E-01 | 0.2020E+04 | 0xff0000 |
| 0.1266E+03 | 0.1502E-01 | 0.2020E+04 | 0xff0000 |
| 0.1284E+03 | 0.1322E-01 | 0.2020E+04 | 0xff0000 |
| 0.1302E+03 | 0.1136E-01 | 0.2020E+04 | 0xff0000 |
| 0.1320E+03 | 0.9611E-02 | 0.2020E+04 | 0xff0000 |
| 0.1338E+03 | 0.8048E-02 | 0.2020E+04 | 0xff0000 |
| 0.1356E+03 | 0.6864E-02 | 0.2020E+04 | 0xff0000 |
| 0.1374E+03 | 0.5820E-02 | 0.2020E+04 | 0xff0000 |
| 0.1392E+03 | 0.4832E-02 | 0.2020E+04 | 0xff0000 |
| 0.1410E+03 | 0.3894E-02 | 0.2020E+04 | 0xff0000 |
| 0.1428E+03 | 0.3165E-02 | 0.2020E+04 | 0xff0000 |
| 0.1446E+03 | 0.2564E-02 | 0.2020E+04 | 0xff0000 |
| 0.1464E+03 | 0.2063E-02 | 0.2020E+04 | 0xff0000 |
| 0.1482E+03 | 0.1685E-02 | 0.2020E+04 | 0xff0000 |
| 0.1500E+03 | 0.1359E-02 | 0.2020E+04 | 0xff0000 |
| 0.1518E+03 | 0.1082E-02 | 0.2020E+04 | 0xff0000 |

V2\_Results\_baseline\_Irena\_delay.dat

|            |            |            |          |
|------------|------------|------------|----------|
| 0.1536E+03 | 0.8430E-03 | 0.2020E+04 | 0xff0000 |
| 0.1554E+03 | 0.6774E-03 | 0.2020E+04 | 0xff0000 |
| 0.1572E+03 | 0.5634E-03 | 0.2020E+04 | 0xff0000 |
| 0.1590E+03 | 0.4403E-03 | 0.2020E+04 | 0xff0000 |
| 0.1608E+03 | 0.3268E-03 | 0.2020E+04 | 0xff0000 |
| 0.1626E+03 | 0.2463E-03 | 0.2020E+04 | 0xff0000 |
| 0.1644E+03 | 0.2101E-03 | 0.2020E+04 | 0xff0000 |
| 0.1662E+03 | 0.1775E-03 | 0.2020E+04 | 0xff0000 |
| 0.1680E+03 | 0.1575E-03 | 0.2020E+04 | 0xff0000 |
| 0.1698E+03 | 0.1271E-03 | 0.2020E+04 | 0xff0000 |
| 0.1716E+03 | 0.9997E-04 | 0.2020E+04 | 0xff0000 |
| 0.1734E+03 | 0.6741E-04 | 0.2020E+04 | 0xff0000 |
| 0.1752E+03 | 0.4008E-04 | 0.2020E+04 | 0xff0000 |
| 0.1770E+03 | 0.2719E-04 | 0.2020E+04 | 0xff0000 |
| 0.1788E+03 | 0.2372E-04 | 0.2020E+04 | 0xff0000 |
| 0.1806E+03 | 0.2057E-04 | 0.2020E+04 | 0xff0000 |
| 0.1824E+03 | 0.8633E-05 | 0.2020E+04 | 0xff0000 |
| 0.1842E+03 | 0.2624E-05 | 0.2020E+04 | 0xff0000 |
| 0.1860E+03 | 0.8135E-05 | 0.2020E+04 | 0xff0000 |
| 0.1878E+03 | 0.8777E-05 | 0.2020E+04 | 0xff0000 |
| 0.1896E+03 | 0.5504E-05 | 0.2020E+04 | 0xff0000 |
| 0.1914E+03 | 0.7007E-05 | 0.2020E+04 | 0xff0000 |
| 0.1932E+03 | 0.1008E-04 | 0.2020E+04 | 0xff0000 |
| 0.1950E+03 | 0.7037E-05 | 0.2020E+04 | 0xff0000 |
| 0.1968E+03 | 0.1599E-05 | 0.2020E+04 | 0xff0000 |
| 0.1986E+03 | 0.0000E+00 | 0.2020E+04 | 0xff0000 |
| 0.2003E+03 | 0.0000E+00 | 0.2020E+04 | 0xff0000 |
| 0.2021E+03 | 0.0000E+00 | 0.2020E+04 | 0xff0000 |
| 0.2039E+03 | 0.0000E+00 | 0.2020E+04 | 0xff0000 |
| 0.2057E+03 | 0.0000E+00 | 0.2020E+04 | 0xff0000 |
| 0.2075E+03 | 0.0000E+00 | 0.2020E+04 | 0xff0000 |
| 0.2093E+03 | 0.0000E+00 | 0.2020E+04 | 0xff0000 |
| 0.2111E+03 | 0.0000E+00 | 0.2020E+04 | 0xff0000 |
| 0.2129E+03 | 0.1450E-05 | 0.2020E+04 | 0xff0000 |
| 0.2147E+03 | 0.2325E-05 | 0.2020E+04 | 0xff0000 |

V2\_Results\_baseline\_Irena\_delay.dat

|            |            |            |           |
|------------|------------|------------|-----------|
| 0.5051E+02 | 0.2305E-05 | 0.2030E+04 | 0xfffff00 |
| 0.5217E+02 | 0.3925E-05 | 0.2030E+04 | 0xfffff00 |
| 0.5383E+02 | 0.8790E-05 | 0.2030E+04 | 0xfffff00 |
| 0.5549E+02 | 0.2256E-04 | 0.2030E+04 | 0xfffff00 |
| 0.5715E+02 | 0.5486E-04 | 0.2030E+04 | 0xfffff00 |
| 0.5881E+02 | 0.1327E-03 | 0.2030E+04 | 0xfffff00 |
| 0.6046E+02 | 0.2640E-03 | 0.2030E+04 | 0xfffff00 |
| 0.6212E+02 | 0.4949E-03 | 0.2030E+04 | 0xfffff00 |
| 0.6378E+02 | 0.8662E-03 | 0.2030E+04 | 0xfffff00 |
| 0.6544E+02 | 0.1462E-02 | 0.2030E+04 | 0xfffff00 |
| 0.6710E+02 | 0.2304E-02 | 0.2030E+04 | 0xfffff00 |
| 0.6876E+02 | 0.3517E-02 | 0.2030E+04 | 0xfffff00 |
| 0.7042E+02 | 0.5106E-02 | 0.2030E+04 | 0xfffff00 |
| 0.7208E+02 | 0.6963E-02 | 0.2030E+04 | 0xfffff00 |
| 0.7374E+02 | 0.9059E-02 | 0.2030E+04 | 0xfffff00 |
| 0.7540E+02 | 0.1156E-01 | 0.2030E+04 | 0xfffff00 |
| 0.7705E+02 | 0.1438E-01 | 0.2030E+04 | 0xfffff00 |
| 0.7871E+02 | 0.1740E-01 | 0.2030E+04 | 0xfffff00 |
| 0.8037E+02 | 0.2031E-01 | 0.2030E+04 | 0xfffff00 |
| 0.8203E+02 | 0.2281E-01 | 0.2030E+04 | 0xfffff00 |
| 0.8369E+02 | 0.2499E-01 | 0.2030E+04 | 0xfffff00 |
| 0.8535E+02 | 0.2700E-01 | 0.2030E+04 | 0xfffff00 |
| 0.8701E+02 | 0.2867E-01 | 0.2030E+04 | 0xfffff00 |
| 0.8867E+02 | 0.2977E-01 | 0.2030E+04 | 0xfffff00 |
| 0.9033E+02 | 0.3055E-01 | 0.2030E+04 | 0xfffff00 |
| 0.9199E+02 | 0.3074E-01 | 0.2030E+04 | 0xfffff00 |
| 0.9364E+02 | 0.3009E-01 | 0.2030E+04 | 0xfffff00 |
| 0.9530E+02 | 0.2878E-01 | 0.2030E+04 | 0xfffff00 |
| 0.9696E+02 | 0.2733E-01 | 0.2030E+04 | 0xfffff00 |
| 0.9862E+02 | 0.2589E-01 | 0.2030E+04 | 0xfffff00 |
| 0.1003E+03 | 0.2430E-01 | 0.2030E+04 | 0xfffff00 |
| 0.1019E+03 | 0.2246E-01 | 0.2030E+04 | 0xfffff00 |
| 0.1036E+03 | 0.2033E-01 | 0.2030E+04 | 0xfffff00 |
| 0.1053E+03 | 0.1824E-01 | 0.2030E+04 | 0xfffff00 |
| 0.1069E+03 | 0.1638E-01 | 0.2030E+04 | 0xfffff00 |
| 0.1086E+03 | 0.1469E-01 | 0.2030E+04 | 0xfffff00 |

V2\_Results\_baseline\_Irena\_delay.dat

|            |            |            |           |
|------------|------------|------------|-----------|
| 0.1102E+03 | 0.1312E-01 | 0.2030E+04 | 0xfffff00 |
| 0.1119E+03 | 0.1147E-01 | 0.2030E+04 | 0xfffff00 |
| 0.1136E+03 | 0.9857E-02 | 0.2030E+04 | 0xfffff00 |
| 0.1152E+03 | 0.8340E-02 | 0.2030E+04 | 0xfffff00 |
| 0.1169E+03 | 0.7059E-02 | 0.2030E+04 | 0xfffff00 |
| 0.1185E+03 | 0.5955E-02 | 0.2030E+04 | 0xfffff00 |
| 0.1202E+03 | 0.5083E-02 | 0.2030E+04 | 0xfffff00 |
| 0.1218E+03 | 0.4382E-02 | 0.2030E+04 | 0xfffff00 |
| 0.1235E+03 | 0.3817E-02 | 0.2030E+04 | 0xfffff00 |
| 0.1252E+03 | 0.3174E-02 | 0.2030E+04 | 0xfffff00 |
| 0.1268E+03 | 0.2565E-02 | 0.2030E+04 | 0xfffff00 |
| 0.1285E+03 | 0.2082E-02 | 0.2030E+04 | 0xfffff00 |
| 0.1301E+03 | 0.1753E-02 | 0.2030E+04 | 0xfffff00 |
| 0.1318E+03 | 0.1425E-02 | 0.2030E+04 | 0xfffff00 |
| 0.1335E+03 | 0.1125E-02 | 0.2030E+04 | 0xfffff00 |
| 0.1351E+03 | 0.8893E-03 | 0.2030E+04 | 0xfffff00 |
| 0.1368E+03 | 0.7147E-03 | 0.2030E+04 | 0xfffff00 |
| 0.1384E+03 | 0.5645E-03 | 0.2030E+04 | 0xfffff00 |
| 0.1401E+03 | 0.4616E-03 | 0.2030E+04 | 0xfffff00 |
| 0.1418E+03 | 0.3712E-03 | 0.2030E+04 | 0xfffff00 |
| 0.1434E+03 | 0.3080E-03 | 0.2030E+04 | 0xfffff00 |
| 0.1451E+03 | 0.2749E-03 | 0.2030E+04 | 0xfffff00 |
| 0.1467E+03 | 0.2423E-03 | 0.2030E+04 | 0xfffff00 |
| 0.1484E+03 | 0.2019E-03 | 0.2030E+04 | 0xfffff00 |
| 0.1501E+03 | 0.1505E-03 | 0.2030E+04 | 0xfffff00 |
| 0.1517E+03 | 0.1141E-03 | 0.2030E+04 | 0xfffff00 |
| 0.1534E+03 | 0.9813E-04 | 0.2030E+04 | 0xfffff00 |
| 0.1550E+03 | 0.8410E-04 | 0.2030E+04 | 0xfffff00 |
| 0.1567E+03 | 0.6490E-04 | 0.2030E+04 | 0xfffff00 |
| 0.1583E+03 | 0.5254E-04 | 0.2030E+04 | 0xfffff00 |
| 0.1600E+03 | 0.3995E-04 | 0.2030E+04 | 0xfffff00 |
| 0.1617E+03 | 0.3066E-04 | 0.2030E+04 | 0xfffff00 |
| 0.1633E+03 | 0.2086E-04 | 0.2030E+04 | 0xfffff00 |
| 0.1650E+03 | 0.1225E-04 | 0.2030E+04 | 0xfffff00 |
| 0.1666E+03 | 0.7574E-05 | 0.2030E+04 | 0xfffff00 |
| 0.1683E+03 | 0.6601E-05 | 0.2030E+04 | 0xfffff00 |

V2\_Results\_baseline\_Irena\_delay.dat

|            |            |            |           |
|------------|------------|------------|-----------|
| 0.1700E+03 | 0.5237E-05 | 0.2030E+04 | 0xfffff00 |
| 0.1716E+03 | 0.5466E-05 | 0.2030E+04 | 0xfffff00 |
| 0.1733E+03 | 0.6723E-05 | 0.2030E+04 | 0xfffff00 |
| 0.1749E+03 | 0.6064E-05 | 0.2030E+04 | 0xfffff00 |
| 0.1766E+03 | 0.2850E-05 | 0.2030E+04 | 0xfffff00 |
| 0.1783E+03 | 0.2198E-05 | 0.2030E+04 | 0xfffff00 |
| 0.1799E+03 | 0.2118E-05 | 0.2030E+04 | 0xfffff00 |
| 0.1816E+03 | 0.2409E-05 | 0.2030E+04 | 0xfffff00 |
| 0.1832E+03 | 0.2305E-05 | 0.2030E+04 | 0xfffff00 |
|            |            |            |           |
| 0.2373E+02 | 0.1237E-04 | 0.2040E+04 | 0x00ffff  |
| 0.2473E+02 | 0.1672E-04 | 0.2040E+04 | 0x00ffff  |
| 0.2573E+02 | 0.3908E-04 | 0.2040E+04 | 0x00ffff  |
| 0.2673E+02 | 0.1350E-03 | 0.2040E+04 | 0x00ffff  |
| 0.2773E+02 | 0.3836E-03 | 0.2040E+04 | 0x00ffff  |
| 0.2873E+02 | 0.8228E-03 | 0.2040E+04 | 0x00ffff  |
| 0.2973E+02 | 0.1718E-02 | 0.2040E+04 | 0x00ffff  |
| 0.3073E+02 | 0.3402E-02 | 0.2040E+04 | 0x00ffff  |
| 0.3174E+02 | 0.5945E-02 | 0.2040E+04 | 0x00ffff  |
| 0.3274E+02 | 0.9397E-02 | 0.2040E+04 | 0x00ffff  |
| 0.3374E+02 | 0.1388E-01 | 0.2040E+04 | 0x00ffff  |
| 0.3474E+02 | 0.2016E-01 | 0.2040E+04 | 0x00ffff  |
| 0.3574E+02 | 0.2743E-01 | 0.2040E+04 | 0x00ffff  |
| 0.3674E+02 | 0.3492E-01 | 0.2040E+04 | 0x00ffff  |
| 0.3774E+02 | 0.4173E-01 | 0.2040E+04 | 0x00ffff  |
| 0.3874E+02 | 0.4783E-01 | 0.2040E+04 | 0x00ffff  |
| 0.3974E+02 | 0.5304E-01 | 0.2040E+04 | 0x00ffff  |
| 0.4074E+02 | 0.5735E-01 | 0.2040E+04 | 0x00ffff  |
| 0.4174E+02 | 0.6021E-01 | 0.2040E+04 | 0x00ffff  |
| 0.4275E+02 | 0.6130E-01 | 0.2040E+04 | 0x00ffff  |
| 0.4375E+02 | 0.6092E-01 | 0.2040E+04 | 0x00ffff  |
| 0.4475E+02 | 0.5861E-01 | 0.2040E+04 | 0x00ffff  |
| 0.4575E+02 | 0.5515E-01 | 0.2040E+04 | 0x00ffff  |
| 0.4675E+02 | 0.5153E-01 | 0.2040E+04 | 0x00ffff  |
| 0.4775E+02 | 0.4792E-01 | 0.2040E+04 | 0x00ffff  |
| 0.4875E+02 | 0.4308E-01 | 0.2040E+04 | 0x00ffff  |

V2\_Results\_baseline\_Irena\_delay.dat

|            |            |            |          |
|------------|------------|------------|----------|
| 0.4975E+02 | 0.3788E-01 | 0.2040E+04 | 0x00ffff |
| 0.5075E+02 | 0.3274E-01 | 0.2040E+04 | 0x00ffff |
| 0.5175E+02 | 0.2829E-01 | 0.2040E+04 | 0x00ffff |
| 0.5275E+02 | 0.2453E-01 | 0.2040E+04 | 0x00ffff |
| 0.5376E+02 | 0.2085E-01 | 0.2040E+04 | 0x00ffff |
| 0.5476E+02 | 0.1752E-01 | 0.2040E+04 | 0x00ffff |
| 0.5576E+02 | 0.1497E-01 | 0.2040E+04 | 0x00ffff |
| 0.5676E+02 | 0.1249E-01 | 0.2040E+04 | 0x00ffff |
| 0.5776E+02 | 0.1010E-01 | 0.2040E+04 | 0x00ffff |
| 0.5876E+02 | 0.8196E-02 | 0.2040E+04 | 0x00ffff |
| 0.5976E+02 | 0.6732E-02 | 0.2040E+04 | 0x00ffff |
| 0.6076E+02 | 0.5439E-02 | 0.2040E+04 | 0x00ffff |
| 0.6176E+02 | 0.4239E-02 | 0.2040E+04 | 0x00ffff |
| 0.6276E+02 | 0.3620E-02 | 0.2040E+04 | 0x00ffff |
| 0.6376E+02 | 0.3008E-02 | 0.2040E+04 | 0x00ffff |
| 0.6477E+02 | 0.2277E-02 | 0.2040E+04 | 0x00ffff |
| 0.6577E+02 | 0.1771E-02 | 0.2040E+04 | 0x00ffff |
| 0.6677E+02 | 0.1508E-02 | 0.2040E+04 | 0x00ffff |
| 0.6777E+02 | 0.1273E-02 | 0.2040E+04 | 0x00ffff |
| 0.6877E+02 | 0.1007E-02 | 0.2040E+04 | 0x00ffff |
| 0.6977E+02 | 0.7285E-03 | 0.2040E+04 | 0x00ffff |
| 0.7077E+02 | 0.5683E-03 | 0.2040E+04 | 0x00ffff |
| 0.7177E+02 | 0.4836E-03 | 0.2040E+04 | 0x00ffff |
| 0.7277E+02 | 0.3700E-03 | 0.2040E+04 | 0x00ffff |
| 0.7377E+02 | 0.2892E-03 | 0.2040E+04 | 0x00ffff |
| 0.7477E+02 | 0.2330E-03 | 0.2040E+04 | 0x00ffff |
| 0.7578E+02 | 0.1826E-03 | 0.2040E+04 | 0x00ffff |
| 0.7678E+02 | 0.1185E-03 | 0.2040E+04 | 0x00ffff |
| 0.7778E+02 | 0.7690E-04 | 0.2040E+04 | 0x00ffff |
| 0.7878E+02 | 0.8780E-04 | 0.2040E+04 | 0x00ffff |
| 0.7978E+02 | 0.9900E-04 | 0.2040E+04 | 0x00ffff |
| 0.8078E+02 | 0.8247E-04 | 0.2040E+04 | 0x00ffff |
| 0.8178E+02 | 0.5407E-04 | 0.2040E+04 | 0x00ffff |
| 0.8278E+02 | 0.2739E-04 | 0.2040E+04 | 0x00ffff |
| 0.8378E+02 | 0.3215E-04 | 0.2040E+04 | 0x00ffff |
| 0.8478E+02 | 0.3250E-04 | 0.2040E+04 | 0x00ffff |

V2\_Results\_baseline\_Irena\_delay.dat

|            |            |            |          |
|------------|------------|------------|----------|
| 0.8578E+02 | 0.2626E-04 | 0.2040E+04 | 0x00ffff |
| 0.8679E+02 | 0.2222E-04 | 0.2040E+04 | 0x00ffff |
| 0.8779E+02 | 0.2821E-04 | 0.2040E+04 | 0x00ffff |
| 0.8879E+02 | 0.2668E-04 | 0.2040E+04 | 0x00ffff |
| 0.8979E+02 | 0.2241E-04 | 0.2040E+04 | 0x00ffff |
| 0.9079E+02 | 0.1906E-04 | 0.2040E+04 | 0x00ffff |
| 0.9179E+02 | 0.1549E-04 | 0.2040E+04 | 0x00ffff |
| 0.9279E+02 | 0.1067E-04 | 0.2040E+04 | 0x00ffff |
| 0.9379E+02 | 0.2872E-05 | 0.2040E+04 | 0x00ffff |
| 0.9479E+02 | 0.0000E+00 | 0.2040E+04 | 0x00ffff |
| 0.9579E+02 | 0.0000E+00 | 0.2040E+04 | 0x00ffff |
| 0.9679E+02 | 0.0000E+00 | 0.2040E+04 | 0x00ffff |
| 0.9780E+02 | 0.0000E+00 | 0.2040E+04 | 0x00ffff |
| 0.9880E+02 | 0.0000E+00 | 0.2040E+04 | 0x00ffff |
| 0.9980E+02 | 0.0000E+00 | 0.2040E+04 | 0x00ffff |
| 0.1008E+03 | 0.0000E+00 | 0.2040E+04 | 0x00ffff |
| 0.1018E+03 | 0.0000E+00 | 0.2040E+04 | 0x00ffff |
| 0.1028E+03 | 0.2522E-05 | 0.2040E+04 | 0x00ffff |
| 0.1038E+03 | 0.4528E-05 | 0.2040E+04 | 0x00ffff |
|            |            |            |          |
| 0.2113E+02 | 0.2672E-04 | 0.2050E+04 | 0x0000ff |
| 0.2197E+02 | 0.8355E-04 | 0.2050E+04 | 0x0000ff |
| 0.2282E+02 | 0.2008E-03 | 0.2050E+04 | 0x0000ff |
| 0.2367E+02 | 0.4473E-03 | 0.2050E+04 | 0x0000ff |
| 0.2451E+02 | 0.9274E-03 | 0.2050E+04 | 0x0000ff |
| 0.2536E+02 | 0.1818E-02 | 0.2050E+04 | 0x0000ff |
| 0.2621E+02 | 0.3555E-02 | 0.2050E+04 | 0x0000ff |
| 0.2706E+02 | 0.6266E-02 | 0.2050E+04 | 0x0000ff |
| 0.2790E+02 | 0.9912E-02 | 0.2050E+04 | 0x0000ff |
| 0.2875E+02 | 0.1498E-01 | 0.2050E+04 | 0x0000ff |
| 0.2960E+02 | 0.2119E-01 | 0.2050E+04 | 0x0000ff |
| 0.3044E+02 | 0.2824E-01 | 0.2050E+04 | 0x0000ff |
| 0.3129E+02 | 0.3588E-01 | 0.2050E+04 | 0x0000ff |
| 0.3214E+02 | 0.4355E-01 | 0.2050E+04 | 0x0000ff |
| 0.3298E+02 | 0.5064E-01 | 0.2050E+04 | 0x0000ff |
| 0.3383E+02 | 0.5694E-01 | 0.2050E+04 | 0x0000ff |

V2\_Results\_baseline\_Irena\_delay.dat

|            |            |            |          |
|------------|------------|------------|----------|
| 0.3468E+02 | 0.6187E-01 | 0.2050E+04 | 0x0000ff |
| 0.3552E+02 | 0.6477E-01 | 0.2050E+04 | 0x0000ff |
| 0.3637E+02 | 0.6675E-01 | 0.2050E+04 | 0x0000ff |
| 0.3722E+02 | 0.6782E-01 | 0.2050E+04 | 0x0000ff |
| 0.3807E+02 | 0.6731E-01 | 0.2050E+04 | 0x0000ff |
| 0.3891E+02 | 0.6527E-01 | 0.2050E+04 | 0x0000ff |
| 0.3976E+02 | 0.6226E-01 | 0.2050E+04 | 0x0000ff |
| 0.4061E+02 | 0.5775E-01 | 0.2050E+04 | 0x0000ff |
| 0.4145E+02 | 0.5275E-01 | 0.2050E+04 | 0x0000ff |
| 0.4230E+02 | 0.4759E-01 | 0.2050E+04 | 0x0000ff |
| 0.4315E+02 | 0.4297E-01 | 0.2050E+04 | 0x0000ff |
| 0.4399E+02 | 0.3792E-01 | 0.2050E+04 | 0x0000ff |
| 0.4484E+02 | 0.3302E-01 | 0.2050E+04 | 0x0000ff |
| 0.4569E+02 | 0.2901E-01 | 0.2050E+04 | 0x0000ff |
| 0.4653E+02 | 0.2498E-01 | 0.2050E+04 | 0x0000ff |
| 0.4738E+02 | 0.2115E-01 | 0.2050E+04 | 0x0000ff |
| 0.4823E+02 | 0.1786E-01 | 0.2050E+04 | 0x0000ff |
| 0.4908E+02 | 0.1499E-01 | 0.2050E+04 | 0x0000ff |
| 0.4992E+02 | 0.1267E-01 | 0.2050E+04 | 0x0000ff |
| 0.5077E+02 | 0.1063E-01 | 0.2050E+04 | 0x0000ff |
| 0.5162E+02 | 0.8672E-02 | 0.2050E+04 | 0x0000ff |
| 0.5246E+02 | 0.6796E-02 | 0.2050E+04 | 0x0000ff |
| 0.5331E+02 | 0.5642E-02 | 0.2050E+04 | 0x0000ff |
| 0.5416E+02 | 0.4823E-02 | 0.2050E+04 | 0x0000ff |
| 0.5500E+02 | 0.3993E-02 | 0.2050E+04 | 0x0000ff |
| 0.5585E+02 | 0.3163E-02 | 0.2050E+04 | 0x0000ff |
| 0.5670E+02 | 0.2485E-02 | 0.2050E+04 | 0x0000ff |
| 0.5754E+02 | 0.2014E-02 | 0.2050E+04 | 0x0000ff |
| 0.5839E+02 | 0.1706E-02 | 0.2050E+04 | 0x0000ff |
| 0.5924E+02 | 0.1420E-02 | 0.2050E+04 | 0x0000ff |
| 0.6009E+02 | 0.1078E-02 | 0.2050E+04 | 0x0000ff |
| 0.6093E+02 | 0.9073E-03 | 0.2050E+04 | 0x0000ff |
| 0.6178E+02 | 0.7801E-03 | 0.2050E+04 | 0x0000ff |
| 0.6263E+02 | 0.5993E-03 | 0.2050E+04 | 0x0000ff |
| 0.6347E+02 | 0.4381E-03 | 0.2050E+04 | 0x0000ff |
| 0.6432E+02 | 0.3755E-03 | 0.2050E+04 | 0x0000ff |

V2\_Results\_baseline\_Irena\_delay.dat

|            |            |            |          |
|------------|------------|------------|----------|
| 0.6517E+02 | 0.3332E-03 | 0.2050E+04 | 0x0000ff |
| 0.6601E+02 | 0.2633E-03 | 0.2050E+04 | 0x0000ff |
| 0.6686E+02 | 0.1897E-03 | 0.2050E+04 | 0x0000ff |
| 0.6771E+02 | 0.1728E-03 | 0.2050E+04 | 0x0000ff |
| 0.6856E+02 | 0.1647E-03 | 0.2050E+04 | 0x0000ff |
| 0.6940E+02 | 0.1251E-03 | 0.2050E+04 | 0x0000ff |
| 0.7025E+02 | 0.9325E-04 | 0.2050E+04 | 0x0000ff |
| 0.7110E+02 | 0.6057E-04 | 0.2050E+04 | 0x0000ff |
| 0.7194E+02 | 0.4549E-04 | 0.2050E+04 | 0x0000ff |
| 0.7279E+02 | 0.4773E-04 | 0.2050E+04 | 0x0000ff |
| 0.7364E+02 | 0.4370E-04 | 0.2050E+04 | 0x0000ff |
| 0.7448E+02 | 0.4480E-04 | 0.2050E+04 | 0x0000ff |
| 0.7533E+02 | 0.4359E-04 | 0.2050E+04 | 0x0000ff |
| 0.7618E+02 | 0.4144E-04 | 0.2050E+04 | 0x0000ff |
| 0.7702E+02 | 0.2459E-04 | 0.2050E+04 | 0x0000ff |
| 0.7787E+02 | 0.1512E-04 | 0.2050E+04 | 0x0000ff |
| 0.7872E+02 | 0.9956E-05 | 0.2050E+04 | 0x0000ff |
| 0.7957E+02 | 0.5586E-05 | 0.2050E+04 | 0x0000ff |
| 0.8041E+02 | 0.0000E+00 | 0.2050E+04 | 0x0000ff |
| 0.8126E+02 | 0.3756E-05 | 0.2050E+04 | 0x0000ff |
| 0.8211E+02 | 0.1302E-04 | 0.2050E+04 | 0x0000ff |
| 0.8295E+02 | 0.2386E-04 | 0.2050E+04 | 0x0000ff |
| 0.8380E+02 | 0.2426E-04 | 0.2050E+04 | 0x0000ff |
| 0.8465E+02 | 0.1361E-04 | 0.2050E+04 | 0x0000ff |
| 0.8549E+02 | 0.4349E-05 | 0.2050E+04 | 0x0000ff |
| 0.8634E+02 | 0.2856E-05 | 0.2050E+04 | 0x0000ff |
| 0.8719E+02 | 0.5024E-05 | 0.2050E+04 | 0x0000ff |
| 0.8803E+02 | 0.6941E-05 | 0.2050E+04 | 0x0000ff |
| 0.8888E+02 | 0.5048E-05 | 0.2050E+04 | 0x0000ff |

# \*\*\*\*\* Standardised \*\*\*\*\*

|            |             |            |             |            |             |            |             |
|------------|-------------|------------|-------------|------------|-------------|------------|-------------|
| -200       | -0.3109E+01 | 0.9873E-04 | -0.3235E+01 | 0.3156E-04 | -0.3052E+01 | 0.8615E-04 | -0.2858E+01 |
| 0.1670E-03 |             |            |             |            |             |            |             |
| -195       | -0.2977E+01 | 0.1897E-03 | -0.3114E+01 | 0.5373E-04 | -0.2909E+01 | 0.1164E-03 | -0.2723E+01 |
| 0.5221E-03 |             |            |             |            |             |            |             |

V2\_Results\_baseline\_Irena\_delay.dat

|            |             |            |             |            |             |            |             |
|------------|-------------|------------|-------------|------------|-------------|------------|-------------|
| -190       | -0.2844E+01 | 0.4049E-03 | -0.2993E+01 | 0.1203E-03 | -0.2765E+01 | 0.2721E-03 | -0.2587E+01 |
| 0.1255E-02 |             |            |             |            |             |            |             |
| -185       | -0.2712E+01 | 0.1004E-02 | -0.2872E+01 | 0.3088E-03 | -0.2621E+01 | 0.9398E-03 | -0.2452E+01 |
| 0.2795E-02 |             |            |             |            |             |            |             |
| -180       | -0.2579E+01 | 0.2255E-02 | -0.2751E+01 | 0.7510E-03 | -0.2477E+01 | 0.2671E-02 | -0.2316E+01 |
| 0.5795E-02 |             |            |             |            |             |            |             |
| -175       | -0.2447E+01 | 0.4808E-02 | -0.2629E+01 | 0.1817E-02 | -0.2334E+01 | 0.5729E-02 | -0.2181E+01 |
| 0.1136E-01 |             |            |             |            |             |            |             |
| -170       | -0.2314E+01 | 0.9553E-02 | -0.2508E+01 | 0.3614E-02 | -0.2190E+01 | 0.1196E-01 | -0.2045E+01 |
| 0.2221E-01 |             |            |             |            |             |            |             |
| -165       | -0.2182E+01 | 0.1789E-01 | -0.2387E+01 | 0.6775E-02 | -0.2046E+01 | 0.2368E-01 | -0.1910E+01 |
| 0.3915E-01 |             |            |             |            |             |            |             |
| -160       | -0.2049E+01 | 0.2945E-01 | -0.2266E+01 | 0.1186E-01 | -0.1902E+01 | 0.4140E-01 | -0.1774E+01 |
| 0.6193E-01 |             |            |             |            |             |            |             |
| -155       | -0.1916E+01 | 0.4577E-01 | -0.2145E+01 | 0.2002E-01 | -0.1759E+01 | 0.6543E-01 | -0.1638E+01 |
| 0.9358E-01 |             |            |             |            |             |            |             |
| -150       | -0.1784E+01 | 0.6751E-01 | -0.2024E+01 | 0.3154E-01 | -0.1615E+01 | 0.9663E-01 | -0.1503E+01 |
| 0.1324E+00 |             |            |             |            |             |            |             |
| -145       | -0.1651E+01 | 0.9654E-01 | -0.1902E+01 | 0.4816E-01 | -0.1471E+01 | 0.1403E+00 | -0.1367E+01 |
| 0.1765E+00 |             |            |             |            |             |            |             |
| -140       | -0.1519E+01 | 0.1307E+00 | -0.1781E+01 | 0.6990E-01 | -0.1327E+01 | 0.1910E+00 | -0.1232E+01 |
| 0.2242E+00 |             |            |             |            |             |            |             |
| -135       | -0.1386E+01 | 0.1695E+00 | -0.1660E+01 | 0.9532E-01 | -0.1183E+01 | 0.2431E+00 | -0.1096E+01 |
| 0.2721E+00 |             |            |             |            |             |            |             |
| -130       | -0.1254E+01 | 0.2118E+00 | -0.1539E+01 | 0.1240E+00 | -0.1040E+01 | 0.2906E+00 | -0.9607E+00 |
| 0.3164E+00 |             |            |             |            |             |            |             |
| -125       | -0.1121E+01 | 0.2577E+00 | -0.1418E+01 | 0.1583E+00 | -0.8960E+00 | 0.3330E+00 | -0.8252E+00 |
| 0.3558E+00 |             |            |             |            |             |            |             |
| -120       | -0.9888E+00 | 0.3003E+00 | -0.1296E+01 | 0.1969E+00 | -0.7522E+00 | 0.3693E+00 | -0.6896E+00 |
| 0.3866E+00 |             |            |             |            |             |            |             |
| -115       | -0.8562E+00 | 0.3351E+00 | -0.1175E+01 | 0.2382E+00 | -0.6085E+00 | 0.3993E+00 | -0.5541E+00 |
| 0.4047E+00 |             |            |             |            |             |            |             |
| -110       | -0.7237E+00 | 0.3624E+00 | -0.1054E+01 | 0.2780E+00 | -0.4647E+00 | 0.4192E+00 | -0.4185E+00 |
| 0.4171E+00 |             |            |             |            |             |            |             |
| -105       | -0.5912E+00 | 0.3851E+00 | -0.9329E+00 | 0.3123E+00 | -0.3209E+00 | 0.4268E+00 | -0.2830E+00 |
| 0.4238E+00 |             |            |             |            |             |            |             |

V2\_Results\_baseline\_Irena\_delay.dat

|            |             |            |             |            |             |            |             |
|------------|-------------|------------|-------------|------------|-------------|------------|-------------|
| -100       | -0.4586E+00 | 0.4050E+00 | -0.8117E+00 | 0.3421E+00 | -0.1772E+00 | 0.4242E+00 | -0.1474E+00 |
| 0.4206E+00 |             |            |             |            |             |            |             |
| -95        | -0.3261E+00 | 0.4163E+00 | -0.6906E+00 | 0.3697E+00 | -0.3344E-01 | 0.4081E+00 | -0.1189E-01 |
| 0.4078E+00 |             |            |             |            |             |            |             |
| -90        | -0.1936E+00 | 0.4158E+00 | -0.5694E+00 | 0.3925E+00 | 0.1103E+00  | 0.3840E+00 | 0.1237E+00  |
| 0.3890E+00 |             |            |             |            |             |            |             |
| -85        | -0.6104E-01 | 0.4057E+00 | -0.4482E+00 | 0.4076E+00 | 0.2541E+00  | 0.3588E+00 | 0.2592E+00  |
| 0.3609E+00 |             |            |             |            |             |            |             |
| -80        | 0.7150E-01  | 0.3887E+00 | -0.3270E+00 | 0.4183E+00 | 0.3978E+00  | 0.3336E+00 | 0.3947E+00  |
| 0.3296E+00 |             |            |             |            |             |            |             |
| -75        | 0.2040E+00  | 0.3655E+00 | -0.2058E+00 | 0.4209E+00 | 0.5416E+00  | 0.3000E+00 | 0.5303E+00  |
| 0.2974E+00 |             |            |             |            |             |            |             |
| -70        | 0.3366E+00  | 0.3420E+00 | -0.8467E-01 | 0.4120E+00 | 0.6853E+00  | 0.2638E+00 | 0.6658E+00  |
| 0.2685E+00 |             |            |             |            |             |            |             |
| -65        | 0.4691E+00  | 0.3165E+00 | 0.3651E-01  | 0.3940E+00 | 0.8291E+00  | 0.2279E+00 | 0.8014E+00  |
| 0.2369E+00 |             |            |             |            |             |            |             |
| -60        | 0.6016E+00  | 0.2888E+00 | 0.1577E+00  | 0.3741E+00 | 0.9729E+00  | 0.1970E+00 | 0.9369E+00  |
| 0.2063E+00 |             |            |             |            |             |            |             |
| -55        | 0.7341E+00  | 0.2583E+00 | 0.2789E+00  | 0.3544E+00 | 0.1117E+01  | 0.1708E+00 | 0.1072E+01  |
| 0.1813E+00 |             |            |             |            |             |            |             |
| -50        | 0.8667E+00  | 0.2302E+00 | 0.4001E+00  | 0.3327E+00 | 0.1260E+01  | 0.1452E+00 | 0.1208E+01  |
| 0.1561E+00 |             |            |             |            |             |            |             |
| -45        | 0.9992E+00  | 0.2038E+00 | 0.5212E+00  | 0.3075E+00 | 0.1404E+01  | 0.1220E+00 | 0.1344E+01  |
| 0.1322E+00 |             |            |             |            |             |            |             |
| -40        | 0.1132E+01  | 0.1794E+00 | 0.6424E+00  | 0.2783E+00 | 0.1548E+01  | 0.1043E+00 | 0.1479E+01  |
| 0.1116E+00 |             |            |             |            |             |            |             |
| -35        | 0.1264E+01  | 0.1541E+00 | 0.7636E+00  | 0.2497E+00 | 0.1692E+01  | 0.8694E-01 | 0.1615E+01  |
| 0.9364E-01 |             |            |             |            |             |            |             |
| -30        | 0.1397E+01  | 0.1304E+00 | 0.8848E+00  | 0.2243E+00 | 0.1835E+01  | 0.7029E-01 | 0.1750E+01  |
| 0.7915E-01 |             |            |             |            |             |            |             |
| -25        | 0.1529E+01  | 0.1092E+00 | 0.1006E+01  | 0.2011E+00 | 0.1979E+01  | 0.5707E-01 | 0.1886E+01  |
| 0.6640E-01 |             |            |             |            |             |            |             |
| -20        | 0.1662E+01  | 0.9314E-01 | 0.1127E+01  | 0.1796E+00 | 0.2123E+01  | 0.4687E-01 | 0.2021E+01  |
| 0.5419E-01 |             |            |             |            |             |            |             |
| -15        | 0.1794E+01  | 0.7897E-01 | 0.1248E+01  | 0.1570E+00 | 0.2267E+01  | 0.3787E-01 | 0.2157E+01  |
| 0.4246E-01 |             |            |             |            |             |            |             |

V2\_Results\_baseline\_Irena\_delay.dat

|            |            |            |            |            |            |            |            |
|------------|------------|------------|------------|------------|------------|------------|------------|
| -10        | 0.1927E+01 | 0.6557E-01 | 0.1369E+01 | 0.1349E+00 | 0.2410E+01 | 0.2952E-01 | 0.2292E+01 |
| 0.3525E-01 |            |            |            |            |            |            |            |
| -5         | 0.2059E+01 | 0.5283E-01 | 0.1491E+01 | 0.1142E+00 | 0.2554E+01 | 0.2520E-01 | 0.2428E+01 |
| 0.3014E-01 |            |            |            |            |            |            |            |
| 0          | 0.2192E+01 | 0.4294E-01 | 0.1612E+01 | 0.9664E-01 | 0.2698E+01 | 0.2094E-01 | 0.2563E+01 |
| 0.2495E-01 |            |            |            |            |            |            |            |
| 5          | 0.2325E+01 | 0.3479E-01 | 0.1733E+01 | 0.8153E-01 | 0.2842E+01 | 0.1585E-01 | 0.2699E+01 |
| 0.1976E-01 |            |            |            |            |            |            |            |
| 10         | 0.2457E+01 | 0.2800E-01 | 0.1854E+01 | 0.6959E-01 | 0.2985E+01 | 0.1233E-01 | 0.2835E+01 |
| 0.1553E-01 |            |            |            |            |            |            |            |
| 15         | 0.2590E+01 | 0.2287E-01 | 0.1975E+01 | 0.5999E-01 | 0.3129E+01 | 0.1050E-01 | 0.2970E+01 |
| 0.1258E-01 |            |            |            |            |            |            |            |
| 20         | 0.2722E+01 | 0.1844E-01 | 0.2097E+01 | 0.5226E-01 | 0.3273E+01 | 0.8863E-02 | 0.3106E+01 |
| 0.1066E-01 |            |            |            |            |            |            |            |
| 25         | 0.2855E+01 | 0.1469E-01 | 0.2218E+01 | 0.4345E-01 | 0.3417E+01 | 0.7012E-02 | 0.3241E+01 |
| 0.8874E-02 |            |            |            |            |            |            |            |
| 30         | 0.2987E+01 | 0.1144E-01 | 0.2339E+01 | 0.3512E-01 | 0.3560E+01 | 0.5072E-02 | 0.3377E+01 |
| 0.6734E-02 |            |            |            |            |            |            |            |
| 35         | 0.3120E+01 | 0.9191E-02 | 0.2460E+01 | 0.2851E-01 | 0.3704E+01 | 0.3957E-02 | 0.3512E+01 |
| 0.5669E-02 |            |            |            |            |            |            |            |
| 40         | 0.3252E+01 | 0.7645E-02 | 0.2581E+01 | 0.2399E-01 | 0.3848E+01 | 0.3367E-02 | 0.3648E+01 |
| 0.4875E-02 |            |            |            |            |            |            |            |
| 45         | 0.3385E+01 | 0.5974E-02 | 0.2702E+01 | 0.1952E-01 | 0.3992E+01 | 0.2576E-02 | 0.3783E+01 |
| 0.3745E-02 |            |            |            |            |            |            |            |
| 50         | 0.3517E+01 | 0.4434E-02 | 0.2824E+01 | 0.1541E-01 | 0.4136E+01 | 0.2013E-02 | 0.3919E+01 |
| 0.2738E-02 |            |            |            |            |            |            |            |
| 55         | 0.3650E+01 | 0.3342E-02 | 0.2945E+01 | 0.1217E-01 | 0.4279E+01 | 0.1622E-02 | 0.4054E+01 |
| 0.2347E-02 |            |            |            |            |            |            |            |
| 60         | 0.3782E+01 | 0.2851E-02 | 0.3066E+01 | 0.9784E-02 | 0.4423E+01 | 0.1271E-02 | 0.4190E+01 |
| 0.2082E-02 |            |            |            |            |            |            |            |
| 65         | 0.3915E+01 | 0.2409E-02 | 0.3187E+01 | 0.7729E-02 | 0.4567E+01 | 0.8248E-03 | 0.4326E+01 |
| 0.1645E-02 |            |            |            |            |            |            |            |
| 70         | 0.4047E+01 | 0.2137E-02 | 0.3308E+01 | 0.6320E-02 | 0.4711E+01 | 0.5354E-03 | 0.4461E+01 |
| 0.1185E-02 |            |            |            |            |            |            |            |
| 75         | 0.4180E+01 | 0.1724E-02 | 0.3430E+01 | 0.5083E-02 | 0.4854E+01 | 0.6113E-03 | 0.4597E+01 |
| 0.1080E-02 |            |            |            |            |            |            |            |

V2\_Results\_baseline\_Irena\_delay.dat

|            |            |            |            |            |            |            |            |
|------------|------------|------------|------------|------------|------------|------------|------------|
| 80         | 0.4312E+01 | 0.1356E-02 | 0.3551E+01 | 0.4217E-02 | 0.4998E+01 | 0.6893E-03 | 0.4732E+01 |
| 0.1029E-02 |            |            |            |            |            |            |            |
| 85         | 0.4445E+01 | 0.9146E-03 | 0.3672E+01 | 0.3764E-02 | 0.5142E+01 | 0.5742E-03 | 0.4868E+01 |
| 0.7815E-03 |            |            |            |            |            |            |            |
| 90         | 0.4578E+01 | 0.5439E-03 | 0.3793E+01 | 0.3317E-02 | 0.5286E+01 | 0.3765E-03 | 0.5003E+01 |
| 0.5827E-03 |            |            |            |            |            |            |            |
| 95         | 0.4710E+01 | 0.3690E-03 | 0.3914E+01 | 0.2764E-02 | 0.5429E+01 | 0.1907E-03 | 0.5139E+01 |
| 0.3785E-03 |            |            |            |            |            |            |            |
| 100        | 0.4843E+01 | 0.3219E-03 | 0.4035E+01 | 0.2060E-02 | 0.5573E+01 | 0.2239E-03 | 0.5274E+01 |
| 0.2842E-03 |            |            |            |            |            |            |            |
| 105        | 0.4975E+01 | 0.2791E-03 | 0.4157E+01 | 0.1562E-02 | 0.5717E+01 | 0.2263E-03 | 0.5410E+01 |
| 0.2983E-03 |            |            |            |            |            |            |            |
| 110        | 0.5108E+01 | 0.1171E-03 | 0.4278E+01 | 0.1344E-02 | 0.5861E+01 | 0.1828E-03 | 0.5545E+01 |
| 0.2731E-03 |            |            |            |            |            |            |            |
| 115        | 0.5240E+01 | 0.3561E-04 | 0.4399E+01 | 0.1151E-02 | 0.6004E+01 | 0.1547E-03 | 0.5681E+01 |
| 0.2799E-03 |            |            |            |            |            |            |            |
| 120        | 0.5373E+01 | 0.1104E-03 | 0.4520E+01 | 0.8885E-03 | 0.6148E+01 | 0.1964E-03 | 0.5817E+01 |
| 0.2724E-03 |            |            |            |            |            |            |            |
| 125        | 0.5505E+01 | 0.1191E-03 | 0.4641E+01 | 0.7193E-03 | 0.6292E+01 | 0.1858E-03 | 0.5952E+01 |
| 0.2589E-03 |            |            |            |            |            |            |            |
| 130        | 0.5638E+01 | 0.7467E-04 | 0.4762E+01 | 0.5470E-03 | 0.6436E+01 | 0.1560E-03 | 0.6088E+01 |
| 0.1537E-03 |            |            |            |            |            |            |            |
| 135        | 0.5770E+01 | 0.9508E-04 | 0.4884E+01 | 0.4198E-03 | 0.6579E+01 | 0.1327E-03 | 0.6223E+01 |
| 0.9445E-04 |            |            |            |            |            |            |            |
| 140        | 0.5903E+01 | 0.1367E-03 | 0.5005E+01 | 0.2856E-03 | 0.6723E+01 | 0.1078E-03 | 0.6359E+01 |
| 0.6221E-04 |            |            |            |            |            |            |            |
| 145        | 0.6035E+01 | 0.9548E-04 | 0.5126E+01 | 0.1677E-03 | 0.6867E+01 | 0.7430E-04 | 0.6494E+01 |
| 0.3491E-04 |            |            |            |            |            |            |            |
| 150        | 0.6168E+01 | 0.2169E-04 | 0.5247E+01 | 0.1037E-03 | 0.7011E+01 | 0.2000E-04 | 0.6630E+01 |
| 0.0000E+00 |            |            |            |            |            |            |            |
| 155        | 0.6300E+01 | 0.0000E+00 | 0.5368E+01 | 0.9038E-04 | 0.7154E+01 | 0.0000E+00 | 0.6765E+01 |
| 0.2347E-04 |            |            |            |            |            |            |            |
| 160        | 0.6433E+01 | 0.0000E+00 | 0.5490E+01 | 0.7170E-04 | 0.7298E+01 | 0.0000E+00 | 0.6901E+01 |
| 0.8132E-04 |            |            |            |            |            |            |            |
| 165        | 0.6565E+01 | 0.0000E+00 | 0.5611E+01 | 0.7483E-04 | 0.7442E+01 | 0.0000E+00 | 0.7036E+01 |
| 0.1491E-03 |            |            |            |            |            |            |            |

```

                                V2_Results_baseline_Irena_delay.dat
  170  0.6698E+01  0.0000E+00  0.5732E+01  0.9205E-04  0.7586E+01  0.0000E+00  0.7172E+01
0.1516E-03
  175  0.6831E+01  0.0000E+00  0.5853E+01  0.8302E-04  0.7729E+01  0.0000E+00  0.7307E+01
0.8502E-04
  180  0.6963E+01  0.0000E+00  0.5974E+01  0.3902E-04  0.7873E+01  0.0000E+00  0.7443E+01
0.2718E-04
  185  0.7096E+01  0.0000E+00  0.6095E+01  0.3009E-04  0.8017E+01  0.0000E+00  0.7579E+01
0.1784E-04
  190  0.7228E+01  0.0000E+00  0.6217E+01  0.2899E-04  0.8161E+01  0.0000E+00  0.7714E+01
0.3139E-04
  195  0.7361E+01  0.1967E-04  0.6338E+01  0.3299E-04  0.8304E+01  0.1756E-04  0.7850E+01
0.4337E-04
  200  0.7493E+01  0.3154E-04  0.6459E+01  0.3156E-04  0.8448E+01  0.3153E-04  0.7985E+01
0.3154E-04

```

```

#      *****      adaptados para un plot en 3D con gnuplot      *****

```

```

-0.3109E+01  0.9873E-04  0.2020E+04
-0.2977E+01  0.1897E-03  0.2020E+04
-0.2844E+01  0.4049E-03  0.2020E+04
-0.2712E+01  0.1004E-02  0.2020E+04
-0.2579E+01  0.2255E-02  0.2020E+04
-0.2447E+01  0.4808E-02  0.2020E+04
-0.2314E+01  0.9553E-02  0.2020E+04
-0.2182E+01  0.1789E-01  0.2020E+04
-0.2049E+01  0.2945E-01  0.2020E+04
-0.1916E+01  0.4577E-01  0.2020E+04
-0.1784E+01  0.6751E-01  0.2020E+04
-0.1651E+01  0.9654E-01  0.2020E+04
-0.1519E+01  0.1307E+00  0.2020E+04
-0.1386E+01  0.1695E+00  0.2020E+04
-0.1254E+01  0.2118E+00  0.2020E+04
-0.1121E+01  0.2577E+00  0.2020E+04
-0.9888E+00  0.3003E+00  0.2020E+04
-0.8562E+00  0.3351E+00  0.2020E+04
-0.7237E+00  0.3624E+00  0.2020E+04

```

V2\_Results\_baseline\_Irena\_delay.dat

|             |            |            |
|-------------|------------|------------|
| -0.5912E+00 | 0.3851E+00 | 0.2020E+04 |
| -0.4586E+00 | 0.4050E+00 | 0.2020E+04 |
| -0.3261E+00 | 0.4163E+00 | 0.2020E+04 |
| -0.1936E+00 | 0.4158E+00 | 0.2020E+04 |
| -0.6104E-01 | 0.4057E+00 | 0.2020E+04 |
| 0.7150E-01  | 0.3887E+00 | 0.2020E+04 |
| 0.2040E+00  | 0.3655E+00 | 0.2020E+04 |
| 0.3366E+00  | 0.3420E+00 | 0.2020E+04 |
| 0.4691E+00  | 0.3165E+00 | 0.2020E+04 |
| 0.6016E+00  | 0.2888E+00 | 0.2020E+04 |
| 0.7341E+00  | 0.2583E+00 | 0.2020E+04 |
| 0.8667E+00  | 0.2302E+00 | 0.2020E+04 |
| 0.9992E+00  | 0.2038E+00 | 0.2020E+04 |
| 0.1132E+01  | 0.1794E+00 | 0.2020E+04 |
| 0.1264E+01  | 0.1541E+00 | 0.2020E+04 |
| 0.1397E+01  | 0.1304E+00 | 0.2020E+04 |
| 0.1529E+01  | 0.1092E+00 | 0.2020E+04 |
| 0.1662E+01  | 0.9314E-01 | 0.2020E+04 |
| 0.1794E+01  | 0.7897E-01 | 0.2020E+04 |
| 0.1927E+01  | 0.6557E-01 | 0.2020E+04 |
| 0.2059E+01  | 0.5283E-01 | 0.2020E+04 |
| 0.2192E+01  | 0.4294E-01 | 0.2020E+04 |
| 0.2325E+01  | 0.3479E-01 | 0.2020E+04 |
| 0.2457E+01  | 0.2800E-01 | 0.2020E+04 |
| 0.2590E+01  | 0.2287E-01 | 0.2020E+04 |
| 0.2722E+01  | 0.1844E-01 | 0.2020E+04 |
| 0.2855E+01  | 0.1469E-01 | 0.2020E+04 |
| 0.2987E+01  | 0.1144E-01 | 0.2020E+04 |
| 0.3120E+01  | 0.9191E-02 | 0.2020E+04 |
| 0.3252E+01  | 0.7645E-02 | 0.2020E+04 |
| 0.3385E+01  | 0.5974E-02 | 0.2020E+04 |
| 0.3517E+01  | 0.4434E-02 | 0.2020E+04 |
| 0.3650E+01  | 0.3342E-02 | 0.2020E+04 |
| 0.3782E+01  | 0.2851E-02 | 0.2020E+04 |
| 0.3915E+01  | 0.2409E-02 | 0.2020E+04 |
| 0.4047E+01  | 0.2137E-02 | 0.2020E+04 |

V2\_Results\_baseline\_Irena\_delay.dat

|             |            |            |
|-------------|------------|------------|
| 0.4180E+01  | 0.1724E-02 | 0.2020E+04 |
| 0.4312E+01  | 0.1356E-02 | 0.2020E+04 |
| 0.4445E+01  | 0.9146E-03 | 0.2020E+04 |
| 0.4578E+01  | 0.5439E-03 | 0.2020E+04 |
| 0.4710E+01  | 0.3690E-03 | 0.2020E+04 |
| 0.4843E+01  | 0.3219E-03 | 0.2020E+04 |
| 0.4975E+01  | 0.2791E-03 | 0.2020E+04 |
| 0.5108E+01  | 0.1171E-03 | 0.2020E+04 |
| 0.5240E+01  | 0.3561E-04 | 0.2020E+04 |
| 0.5373E+01  | 0.1104E-03 | 0.2020E+04 |
| 0.5505E+01  | 0.1191E-03 | 0.2020E+04 |
| 0.5638E+01  | 0.7467E-04 | 0.2020E+04 |
| 0.5770E+01  | 0.9508E-04 | 0.2020E+04 |
| 0.5903E+01  | 0.1367E-03 | 0.2020E+04 |
| 0.6035E+01  | 0.9548E-04 | 0.2020E+04 |
| 0.6168E+01  | 0.2169E-04 | 0.2020E+04 |
| 0.6300E+01  | 0.0000E+00 | 0.2020E+04 |
| 0.6433E+01  | 0.0000E+00 | 0.2020E+04 |
| 0.6565E+01  | 0.0000E+00 | 0.2020E+04 |
| 0.6698E+01  | 0.0000E+00 | 0.2020E+04 |
| 0.6831E+01  | 0.0000E+00 | 0.2020E+04 |
| 0.6963E+01  | 0.0000E+00 | 0.2020E+04 |
| 0.7096E+01  | 0.0000E+00 | 0.2020E+04 |
| 0.7228E+01  | 0.0000E+00 | 0.2020E+04 |
| 0.7361E+01  | 0.1967E-04 | 0.2020E+04 |
| 0.7493E+01  | 0.3154E-04 | 0.2020E+04 |
|             |            |            |
| -0.3235E+01 | 0.3156E-04 | 0.2030E+04 |
| -0.3114E+01 | 0.5373E-04 | 0.2030E+04 |
| -0.2993E+01 | 0.1203E-03 | 0.2030E+04 |
| -0.2872E+01 | 0.3088E-03 | 0.2030E+04 |
| -0.2751E+01 | 0.7510E-03 | 0.2030E+04 |
| -0.2629E+01 | 0.1817E-02 | 0.2030E+04 |
| -0.2508E+01 | 0.3614E-02 | 0.2030E+04 |
| -0.2387E+01 | 0.6775E-02 | 0.2030E+04 |
| -0.2266E+01 | 0.1186E-01 | 0.2030E+04 |

V2\_Results\_baseline\_Irena\_delay.dat

|             |            |            |
|-------------|------------|------------|
| -0.2145E+01 | 0.2002E-01 | 0.2030E+04 |
| -0.2024E+01 | 0.3154E-01 | 0.2030E+04 |
| -0.1902E+01 | 0.4816E-01 | 0.2030E+04 |
| -0.1781E+01 | 0.6990E-01 | 0.2030E+04 |
| -0.1660E+01 | 0.9532E-01 | 0.2030E+04 |
| -0.1539E+01 | 0.1240E+00 | 0.2030E+04 |
| -0.1418E+01 | 0.1583E+00 | 0.2030E+04 |
| -0.1296E+01 | 0.1969E+00 | 0.2030E+04 |
| -0.1175E+01 | 0.2382E+00 | 0.2030E+04 |
| -0.1054E+01 | 0.2780E+00 | 0.2030E+04 |
| -0.9329E+00 | 0.3123E+00 | 0.2030E+04 |
| -0.8117E+00 | 0.3421E+00 | 0.2030E+04 |
| -0.6906E+00 | 0.3697E+00 | 0.2030E+04 |
| -0.5694E+00 | 0.3925E+00 | 0.2030E+04 |
| -0.4482E+00 | 0.4076E+00 | 0.2030E+04 |
| -0.3270E+00 | 0.4183E+00 | 0.2030E+04 |
| -0.2058E+00 | 0.4209E+00 | 0.2030E+04 |
| -0.8467E-01 | 0.4120E+00 | 0.2030E+04 |
| 0.3651E-01  | 0.3940E+00 | 0.2030E+04 |
| 0.1577E+00  | 0.3741E+00 | 0.2030E+04 |
| 0.2789E+00  | 0.3544E+00 | 0.2030E+04 |
| 0.4001E+00  | 0.3327E+00 | 0.2030E+04 |
| 0.5212E+00  | 0.3075E+00 | 0.2030E+04 |
| 0.6424E+00  | 0.2783E+00 | 0.2030E+04 |
| 0.7636E+00  | 0.2497E+00 | 0.2030E+04 |
| 0.8848E+00  | 0.2243E+00 | 0.2030E+04 |
| 0.1006E+01  | 0.2011E+00 | 0.2030E+04 |
| 0.1127E+01  | 0.1796E+00 | 0.2030E+04 |
| 0.1248E+01  | 0.1570E+00 | 0.2030E+04 |
| 0.1369E+01  | 0.1349E+00 | 0.2030E+04 |
| 0.1491E+01  | 0.1142E+00 | 0.2030E+04 |
| 0.1612E+01  | 0.9664E-01 | 0.2030E+04 |
| 0.1733E+01  | 0.8153E-01 | 0.2030E+04 |
| 0.1854E+01  | 0.6959E-01 | 0.2030E+04 |
| 0.1975E+01  | 0.5999E-01 | 0.2030E+04 |
| 0.2097E+01  | 0.5226E-01 | 0.2030E+04 |

V2\_Results\_baseline\_Irena\_delay.dat

|            |            |            |
|------------|------------|------------|
| 0.2218E+01 | 0.4345E-01 | 0.2030E+04 |
| 0.2339E+01 | 0.3512E-01 | 0.2030E+04 |
| 0.2460E+01 | 0.2851E-01 | 0.2030E+04 |
| 0.2581E+01 | 0.2399E-01 | 0.2030E+04 |
| 0.2702E+01 | 0.1952E-01 | 0.2030E+04 |
| 0.2824E+01 | 0.1541E-01 | 0.2030E+04 |
| 0.2945E+01 | 0.1217E-01 | 0.2030E+04 |
| 0.3066E+01 | 0.9784E-02 | 0.2030E+04 |
| 0.3187E+01 | 0.7729E-02 | 0.2030E+04 |
| 0.3308E+01 | 0.6320E-02 | 0.2030E+04 |
| 0.3430E+01 | 0.5083E-02 | 0.2030E+04 |
| 0.3551E+01 | 0.4217E-02 | 0.2030E+04 |
| 0.3672E+01 | 0.3764E-02 | 0.2030E+04 |
| 0.3793E+01 | 0.3317E-02 | 0.2030E+04 |
| 0.3914E+01 | 0.2764E-02 | 0.2030E+04 |
| 0.4035E+01 | 0.2060E-02 | 0.2030E+04 |
| 0.4157E+01 | 0.1562E-02 | 0.2030E+04 |
| 0.4278E+01 | 0.1344E-02 | 0.2030E+04 |
| 0.4399E+01 | 0.1151E-02 | 0.2030E+04 |
| 0.4520E+01 | 0.8885E-03 | 0.2030E+04 |
| 0.4641E+01 | 0.7193E-03 | 0.2030E+04 |
| 0.4762E+01 | 0.5470E-03 | 0.2030E+04 |
| 0.4884E+01 | 0.4198E-03 | 0.2030E+04 |
| 0.5005E+01 | 0.2856E-03 | 0.2030E+04 |
| 0.5126E+01 | 0.1677E-03 | 0.2030E+04 |
| 0.5247E+01 | 0.1037E-03 | 0.2030E+04 |
| 0.5368E+01 | 0.9038E-04 | 0.2030E+04 |
| 0.5490E+01 | 0.7170E-04 | 0.2030E+04 |
| 0.5611E+01 | 0.7483E-04 | 0.2030E+04 |
| 0.5732E+01 | 0.9205E-04 | 0.2030E+04 |
| 0.5853E+01 | 0.8302E-04 | 0.2030E+04 |
| 0.5974E+01 | 0.3902E-04 | 0.2030E+04 |
| 0.6095E+01 | 0.3009E-04 | 0.2030E+04 |
| 0.6217E+01 | 0.2899E-04 | 0.2030E+04 |
| 0.6338E+01 | 0.3299E-04 | 0.2030E+04 |
| 0.6459E+01 | 0.3156E-04 | 0.2030E+04 |

V2\_Results\_baseline\_Irena\_delay.dat

|             |            |            |
|-------------|------------|------------|
| -0.3052E+01 | 0.8615E-04 | 0.2040E+04 |
| -0.2909E+01 | 0.1164E-03 | 0.2040E+04 |
| -0.2765E+01 | 0.2721E-03 | 0.2040E+04 |
| -0.2621E+01 | 0.9398E-03 | 0.2040E+04 |
| -0.2477E+01 | 0.2671E-02 | 0.2040E+04 |
| -0.2334E+01 | 0.5729E-02 | 0.2040E+04 |
| -0.2190E+01 | 0.1196E-01 | 0.2040E+04 |
| -0.2046E+01 | 0.2368E-01 | 0.2040E+04 |
| -0.1902E+01 | 0.4140E-01 | 0.2040E+04 |
| -0.1759E+01 | 0.6543E-01 | 0.2040E+04 |
| -0.1615E+01 | 0.9663E-01 | 0.2040E+04 |
| -0.1471E+01 | 0.1403E+00 | 0.2040E+04 |
| -0.1327E+01 | 0.1910E+00 | 0.2040E+04 |
| -0.1183E+01 | 0.2431E+00 | 0.2040E+04 |
| -0.1040E+01 | 0.2906E+00 | 0.2040E+04 |
| -0.8960E+00 | 0.3330E+00 | 0.2040E+04 |
| -0.7522E+00 | 0.3693E+00 | 0.2040E+04 |
| -0.6085E+00 | 0.3993E+00 | 0.2040E+04 |
| -0.4647E+00 | 0.4192E+00 | 0.2040E+04 |
| -0.3209E+00 | 0.4268E+00 | 0.2040E+04 |
| -0.1772E+00 | 0.4242E+00 | 0.2040E+04 |
| -0.3344E-01 | 0.4081E+00 | 0.2040E+04 |
| 0.1103E+00  | 0.3840E+00 | 0.2040E+04 |
| 0.2541E+00  | 0.3588E+00 | 0.2040E+04 |
| 0.3978E+00  | 0.3336E+00 | 0.2040E+04 |
| 0.5416E+00  | 0.3000E+00 | 0.2040E+04 |
| 0.6853E+00  | 0.2638E+00 | 0.2040E+04 |
| 0.8291E+00  | 0.2279E+00 | 0.2040E+04 |
| 0.9729E+00  | 0.1970E+00 | 0.2040E+04 |
| 0.1117E+01  | 0.1708E+00 | 0.2040E+04 |
| 0.1260E+01  | 0.1452E+00 | 0.2040E+04 |
| 0.1404E+01  | 0.1220E+00 | 0.2040E+04 |
| 0.1548E+01  | 0.1043E+00 | 0.2040E+04 |
| 0.1692E+01  | 0.8694E-01 | 0.2040E+04 |
| 0.1835E+01  | 0.7029E-01 | 0.2040E+04 |

V2\_Results\_baseline\_Irena\_delay.dat

|            |            |            |
|------------|------------|------------|
| 0.1979E+01 | 0.5707E-01 | 0.2040E+04 |
| 0.2123E+01 | 0.4687E-01 | 0.2040E+04 |
| 0.2267E+01 | 0.3787E-01 | 0.2040E+04 |
| 0.2410E+01 | 0.2952E-01 | 0.2040E+04 |
| 0.2554E+01 | 0.2520E-01 | 0.2040E+04 |
| 0.2698E+01 | 0.2094E-01 | 0.2040E+04 |
| 0.2842E+01 | 0.1585E-01 | 0.2040E+04 |
| 0.2985E+01 | 0.1233E-01 | 0.2040E+04 |
| 0.3129E+01 | 0.1050E-01 | 0.2040E+04 |
| 0.3273E+01 | 0.8863E-02 | 0.2040E+04 |
| 0.3417E+01 | 0.7012E-02 | 0.2040E+04 |
| 0.3560E+01 | 0.5072E-02 | 0.2040E+04 |
| 0.3704E+01 | 0.3957E-02 | 0.2040E+04 |
| 0.3848E+01 | 0.3367E-02 | 0.2040E+04 |
| 0.3992E+01 | 0.2576E-02 | 0.2040E+04 |
| 0.4136E+01 | 0.2013E-02 | 0.2040E+04 |
| 0.4279E+01 | 0.1622E-02 | 0.2040E+04 |
| 0.4423E+01 | 0.1271E-02 | 0.2040E+04 |
| 0.4567E+01 | 0.8248E-03 | 0.2040E+04 |
| 0.4711E+01 | 0.5354E-03 | 0.2040E+04 |
| 0.4854E+01 | 0.6113E-03 | 0.2040E+04 |
| 0.4998E+01 | 0.6893E-03 | 0.2040E+04 |
| 0.5142E+01 | 0.5742E-03 | 0.2040E+04 |
| 0.5286E+01 | 0.3765E-03 | 0.2040E+04 |
| 0.5429E+01 | 0.1907E-03 | 0.2040E+04 |
| 0.5573E+01 | 0.2239E-03 | 0.2040E+04 |
| 0.5717E+01 | 0.2263E-03 | 0.2040E+04 |
| 0.5861E+01 | 0.1828E-03 | 0.2040E+04 |
| 0.6004E+01 | 0.1547E-03 | 0.2040E+04 |
| 0.6148E+01 | 0.1964E-03 | 0.2040E+04 |
| 0.6292E+01 | 0.1858E-03 | 0.2040E+04 |
| 0.6436E+01 | 0.1560E-03 | 0.2040E+04 |
| 0.6579E+01 | 0.1327E-03 | 0.2040E+04 |
| 0.6723E+01 | 0.1078E-03 | 0.2040E+04 |
| 0.6867E+01 | 0.7430E-04 | 0.2040E+04 |
| 0.7011E+01 | 0.2000E-04 | 0.2040E+04 |

V2\_Results\_baseline\_Irena\_delay.dat

|             |            |            |
|-------------|------------|------------|
| 0.7154E+01  | 0.0000E+00 | 0.2040E+04 |
| 0.7298E+01  | 0.0000E+00 | 0.2040E+04 |
| 0.7442E+01  | 0.0000E+00 | 0.2040E+04 |
| 0.7586E+01  | 0.0000E+00 | 0.2040E+04 |
| 0.7729E+01  | 0.0000E+00 | 0.2040E+04 |
| 0.7873E+01  | 0.0000E+00 | 0.2040E+04 |
| 0.8017E+01  | 0.0000E+00 | 0.2040E+04 |
| 0.8161E+01  | 0.0000E+00 | 0.2040E+04 |
| 0.8304E+01  | 0.1756E-04 | 0.2040E+04 |
| 0.8448E+01  | 0.3153E-04 | 0.2040E+04 |
|             |            |            |
| -0.2858E+01 | 0.1670E-03 | 0.2050E+04 |
| -0.2723E+01 | 0.5221E-03 | 0.2050E+04 |
| -0.2587E+01 | 0.1255E-02 | 0.2050E+04 |
| -0.2452E+01 | 0.2795E-02 | 0.2050E+04 |
| -0.2316E+01 | 0.5795E-02 | 0.2050E+04 |
| -0.2181E+01 | 0.1136E-01 | 0.2050E+04 |
| -0.2045E+01 | 0.2221E-01 | 0.2050E+04 |
| -0.1910E+01 | 0.3915E-01 | 0.2050E+04 |
| -0.1774E+01 | 0.6193E-01 | 0.2050E+04 |
| -0.1638E+01 | 0.9358E-01 | 0.2050E+04 |
| -0.1503E+01 | 0.1324E+00 | 0.2050E+04 |
| -0.1367E+01 | 0.1765E+00 | 0.2050E+04 |
| -0.1232E+01 | 0.2242E+00 | 0.2050E+04 |
| -0.1096E+01 | 0.2721E+00 | 0.2050E+04 |
| -0.9607E+00 | 0.3164E+00 | 0.2050E+04 |
| -0.8252E+00 | 0.3558E+00 | 0.2050E+04 |
| -0.6896E+00 | 0.3866E+00 | 0.2050E+04 |
| -0.5541E+00 | 0.4047E+00 | 0.2050E+04 |
| -0.4185E+00 | 0.4171E+00 | 0.2050E+04 |
| -0.2830E+00 | 0.4238E+00 | 0.2050E+04 |
| -0.1474E+00 | 0.4206E+00 | 0.2050E+04 |
| -0.1189E-01 | 0.4078E+00 | 0.2050E+04 |
| 0.1237E+00  | 0.3890E+00 | 0.2050E+04 |
| 0.2592E+00  | 0.3609E+00 | 0.2050E+04 |
| 0.3947E+00  | 0.3296E+00 | 0.2050E+04 |

V2\_Results\_baseline\_Irena\_delay.dat

|            |            |            |
|------------|------------|------------|
| 0.5303E+00 | 0.2974E+00 | 0.2050E+04 |
| 0.6658E+00 | 0.2685E+00 | 0.2050E+04 |
| 0.8014E+00 | 0.2369E+00 | 0.2050E+04 |
| 0.9369E+00 | 0.2063E+00 | 0.2050E+04 |
| 0.1072E+01 | 0.1813E+00 | 0.2050E+04 |
| 0.1208E+01 | 0.1561E+00 | 0.2050E+04 |
| 0.1344E+01 | 0.1322E+00 | 0.2050E+04 |
| 0.1479E+01 | 0.1116E+00 | 0.2050E+04 |
| 0.1615E+01 | 0.9364E-01 | 0.2050E+04 |
| 0.1750E+01 | 0.7915E-01 | 0.2050E+04 |
| 0.1886E+01 | 0.6640E-01 | 0.2050E+04 |
| 0.2021E+01 | 0.5419E-01 | 0.2050E+04 |
| 0.2157E+01 | 0.4246E-01 | 0.2050E+04 |
| 0.2292E+01 | 0.3525E-01 | 0.2050E+04 |
| 0.2428E+01 | 0.3014E-01 | 0.2050E+04 |
| 0.2563E+01 | 0.2495E-01 | 0.2050E+04 |
| 0.2699E+01 | 0.1976E-01 | 0.2050E+04 |
| 0.2835E+01 | 0.1553E-01 | 0.2050E+04 |
| 0.2970E+01 | 0.1258E-01 | 0.2050E+04 |
| 0.3106E+01 | 0.1066E-01 | 0.2050E+04 |
| 0.3241E+01 | 0.8874E-02 | 0.2050E+04 |
| 0.3377E+01 | 0.6734E-02 | 0.2050E+04 |
| 0.3512E+01 | 0.5669E-02 | 0.2050E+04 |
| 0.3648E+01 | 0.4875E-02 | 0.2050E+04 |
| 0.3783E+01 | 0.3745E-02 | 0.2050E+04 |
| 0.3919E+01 | 0.2738E-02 | 0.2050E+04 |
| 0.4054E+01 | 0.2347E-02 | 0.2050E+04 |
| 0.4190E+01 | 0.2082E-02 | 0.2050E+04 |
| 0.4326E+01 | 0.1645E-02 | 0.2050E+04 |
| 0.4461E+01 | 0.1185E-02 | 0.2050E+04 |
| 0.4597E+01 | 0.1080E-02 | 0.2050E+04 |
| 0.4732E+01 | 0.1029E-02 | 0.2050E+04 |
| 0.4868E+01 | 0.7815E-03 | 0.2050E+04 |
| 0.5003E+01 | 0.5827E-03 | 0.2050E+04 |
| 0.5139E+01 | 0.3785E-03 | 0.2050E+04 |
| 0.5274E+01 | 0.2842E-03 | 0.2050E+04 |

V2\_Results\_baseline\_Irena\_delay.dat

|            |            |            |
|------------|------------|------------|
| 0.5410E+01 | 0.2983E-03 | 0.2050E+04 |
| 0.5545E+01 | 0.2731E-03 | 0.2050E+04 |
| 0.5681E+01 | 0.2799E-03 | 0.2050E+04 |
| 0.5817E+01 | 0.2724E-03 | 0.2050E+04 |
| 0.5952E+01 | 0.2589E-03 | 0.2050E+04 |
| 0.6088E+01 | 0.1537E-03 | 0.2050E+04 |
| 0.6223E+01 | 0.9445E-04 | 0.2050E+04 |
| 0.6359E+01 | 0.6221E-04 | 0.2050E+04 |
| 0.6494E+01 | 0.3491E-04 | 0.2050E+04 |
| 0.6630E+01 | 0.0000E+00 | 0.2050E+04 |
| 0.6765E+01 | 0.2347E-04 | 0.2050E+04 |
| 0.6901E+01 | 0.8132E-04 | 0.2050E+04 |
| 0.7036E+01 | 0.1491E-03 | 0.2050E+04 |
| 0.7172E+01 | 0.1516E-03 | 0.2050E+04 |
| 0.7307E+01 | 0.8502E-04 | 0.2050E+04 |
| 0.7443E+01 | 0.2718E-04 | 0.2050E+04 |
| 0.7579E+01 | 0.1784E-04 | 0.2050E+04 |
| 0.7714E+01 | 0.3139E-04 | 0.2050E+04 |
| 0.7850E+01 | 0.4337E-04 | 0.2050E+04 |
| 0.7985E+01 | 0.3154E-04 | 0.2050E+04 |

```

#*****
#*****          AVOIDED CARBON VALUES ($ tr.)          *****
#*****
# Valued at:    1 US$,    Social Carbon Cost,    Tax IEA,    Tax S.S.
               0.2083E+00    0.3209E+01    0.3137E+02    0.1556E+02

```

```

#*****
#*****          CAPOPEX (all; tr. US$): SUMMARY STATISTICS          *****
#*****

```

MEAN, VARIANCE, SKW, KURT & MAX. VALUES 50%, 80%, 90%, 95%

|           |           |           |           |           |           |           |           |
|-----------|-----------|-----------|-----------|-----------|-----------|-----------|-----------|
| 0.129E+02 | 0.283E+01 | 0.553E+00 | 0.362E+01 | 0.128E+02 | 0.143E+02 | 0.151E+02 | 0.159E+02 |
|-----------|-----------|-----------|-----------|-----------|-----------|-----------|-----------|

V2\_Results\_baseline\_Irena\_delay.dat

CapOpStrEx EXPECT. / ( CapOpStrEx > CapOpStrEx max. al 80%, 90%, 95%)

0.1527E+02 0.1619E+02 0.1682E+02

\*\*\*\*\*  
 #\*\*\*\*\* CAPITAL COSTS - AVOIDED CARBON VALUES (US\$ tr.) \*\*\*\*\*  
 #\*\*\*\*\*

# Valued at: 1 US\$, Social Carbon Cost, Tax IEA, Tax S.S.  
 0.1273E+02 0.9732E+01 -0.1843E+02 -0.2614E+01

\*\*\*\*\*  
 #\*\*\*\*\* CAPITAL PRICES (USD/1W) \*\*\*\*\*  
 #\*\*\*\*\*

# MEANS, VARIANCES & MAX. VALUES 50%, 80%, 90%, 95%  
 # ALL YEARS: 2015-2050

|      |           |           |           |           |           |           |
|------|-----------|-----------|-----------|-----------|-----------|-----------|
| 2015 | 0.130E+01 | 0.680E-01 | 0.127E+01 | 0.149E+01 | 0.164E+01 | 0.177E+01 |
| 2016 | 0.166E+01 | 0.937E-01 | 0.163E+01 | 0.190E+01 | 0.206E+01 | 0.220E+01 |
| 2017 | 0.167E+01 | 0.956E-01 | 0.164E+01 | 0.192E+01 | 0.208E+01 | 0.222E+01 |
| 2018 | 0.167E+01 | 0.942E-01 | 0.164E+01 | 0.191E+01 | 0.207E+01 | 0.221E+01 |
| 2019 | 0.168E+01 | 0.969E-01 | 0.165E+01 | 0.192E+01 | 0.209E+01 | 0.224E+01 |
| 2020 | 0.170E+01 | 0.101E+00 | 0.167E+01 | 0.195E+01 | 0.211E+01 | 0.226E+01 |
| 2021 | 0.170E+01 | 0.998E-01 | 0.166E+01 | 0.195E+01 | 0.211E+01 | 0.225E+01 |
| 2022 | 0.174E+01 | 0.109E+00 | 0.171E+01 | 0.200E+01 | 0.217E+01 | 0.233E+01 |
| 2023 | 0.174E+01 | 0.109E+00 | 0.171E+01 | 0.200E+01 | 0.218E+01 | 0.233E+01 |
| 2024 | 0.174E+01 | 0.110E+00 | 0.171E+01 | 0.200E+01 | 0.217E+01 | 0.233E+01 |
| 2025 | 0.176E+01 | 0.112E+00 | 0.172E+01 | 0.202E+01 | 0.219E+01 | 0.235E+01 |
| 2026 | 0.176E+01 | 0.113E+00 | 0.172E+01 | 0.202E+01 | 0.220E+01 | 0.236E+01 |
| 2027 | 0.175E+01 | 0.111E+00 | 0.172E+01 | 0.201E+01 | 0.218E+01 | 0.234E+01 |
| 2028 | 0.176E+01 | 0.114E+00 | 0.173E+01 | 0.203E+01 | 0.220E+01 | 0.237E+01 |
| 2029 | 0.176E+01 | 0.113E+00 | 0.172E+01 | 0.202E+01 | 0.220E+01 | 0.235E+01 |

V2\_Results\_baseline\_Irena\_delay.dat

|      |           |           |           |           |           |           |
|------|-----------|-----------|-----------|-----------|-----------|-----------|
| 2030 | 0.175E+01 | 0.110E+00 | 0.171E+01 | 0.201E+01 | 0.219E+01 | 0.234E+01 |
| 2031 | 0.105E+01 | 0.515E-01 | 0.102E+01 | 0.122E+01 | 0.134E+01 | 0.146E+01 |
| 2032 | 0.971E+00 | 0.432E-01 | 0.942E+00 | 0.112E+01 | 0.124E+01 | 0.134E+01 |
| 2033 | 0.920E+00 | 0.382E-01 | 0.894E+00 | 0.107E+01 | 0.117E+01 | 0.127E+01 |
| 2034 | 0.882E+00 | 0.347E-01 | 0.856E+00 | 0.102E+01 | 0.112E+01 | 0.122E+01 |
| 2035 | 0.855E+00 | 0.325E-01 | 0.833E+00 | 0.990E+00 | 0.109E+01 | 0.117E+01 |
| 2036 | 0.838E+00 | 0.308E-01 | 0.817E+00 | 0.971E+00 | 0.106E+01 | 0.115E+01 |
| 2037 | 0.811E+00 | 0.294E-01 | 0.790E+00 | 0.936E+00 | 0.103E+01 | 0.112E+01 |
| 2038 | 0.798E+00 | 0.281E-01 | 0.779E+00 | 0.924E+00 | 0.101E+01 | 0.110E+01 |
| 2039 | 0.784E+00 | 0.271E-01 | 0.764E+00 | 0.911E+00 | 0.995E+00 | 0.108E+01 |
| 2040 | 0.750E+00 | 0.256E-01 | 0.730E+00 | 0.869E+00 | 0.958E+00 | 0.103E+01 |
| 2041 | 0.747E+00 | 0.252E-01 | 0.729E+00 | 0.868E+00 | 0.953E+00 | 0.103E+01 |
| 2042 | 0.756E+00 | 0.252E-01 | 0.737E+00 | 0.877E+00 | 0.960E+00 | 0.104E+01 |
| 2043 | 0.674E+00 | 0.228E-01 | 0.653E+00 | 0.784E+00 | 0.865E+00 | 0.941E+00 |
| 2044 | 0.663E+00 | 0.219E-01 | 0.645E+00 | 0.773E+00 | 0.852E+00 | 0.927E+00 |
| 2045 | 0.632E+00 | 0.209E-01 | 0.611E+00 | 0.739E+00 | 0.818E+00 | 0.890E+00 |
| 2046 | 0.669E+00 | 0.214E-01 | 0.649E+00 | 0.779E+00 | 0.856E+00 | 0.925E+00 |
| 2047 | 0.660E+00 | 0.209E-01 | 0.642E+00 | 0.768E+00 | 0.848E+00 | 0.918E+00 |
| 2048 | 0.653E+00 | 0.206E-01 | 0.634E+00 | 0.760E+00 | 0.838E+00 | 0.908E+00 |
| 2049 | 0.647E+00 | 0.202E-01 | 0.627E+00 | 0.752E+00 | 0.829E+00 | 0.902E+00 |
| 2050 | 0.640E+00 | 0.198E-01 | 0.624E+00 | 0.747E+00 | 0.821E+00 | 0.889E+00 |

\*\*\*\*\*  
#\*\*\*\*\* TOTAL COSTS USD/W: TIMELINE BREAKDOWN \*\*\*\*\*  
#\*\*\*\*\*

| #    | PV cap.(Mod+inv) | PV BoS   | PV Str   | W cap.   | W BoS    | W Str    |      |
|------|------------------|----------|----------|----------|----------|----------|------|
| 2015 | 0.383292         | 0.276980 | 0.121379 | 0.642182 | 0.275221 | 0.128538 | 2015 |
| 2016 | 0.096797         | 0.068699 | 0.029501 | 1.095306 | 0.469417 | 0.210724 |      |
| 2017 | 0.087358         | 0.060752 | 0.025565 | 1.110100 | 0.475757 | 0.205344 |      |
| 2018 | 0.091531         | 0.062447 | 0.025752 | 1.103167 | 0.472786 | 0.196203 |      |
| 2019 | 0.079195         | 0.052949 | 0.021397 | 1.122729 | 0.481169 | 0.191951 |      |
| 2020 | 0.064566         | 0.042306 | 0.016753 | 1.145843 | 0.491076 | 0.188321 | 2020 |
| 2021 | 0.069432         | 0.044579 | 0.017299 | 1.138970 | 0.488130 | 0.179822 |      |
| 2022 | 0.031836         | 0.020091 | 0.007640 | 1.197395 | 0.513169 | 0.181837 |      |

V2\_Results\_baseline\_Irena\_delay.dat

|      |          |          |          |          |          |          |      |
|------|----------|----------|----------|----------|----------|----------|------|
| 2023 | 0.032068 | 0.019832 | 0.007390 | 1.197761 | 0.513326 | 0.174739 |      |
| 2024 | 0.031029 | 0.018795 | 0.006863 | 1.199128 | 0.513912 | 0.168203 |      |
| 2025 | 0.021083 | 0.012549 | 0.004490 | 1.214914 | 0.520677 | 0.163786 | 2025 |
| 2026 | 0.019323 | 0.011264 | 0.003950 | 1.217659 | 0.521854 | 0.157801 |      |
| 2027 | 0.025934 | 0.014848 | 0.005102 | 1.206906 | 0.517245 | 0.150376 |      |
| 2028 | 0.015009 | 0.008430 | 0.002839 | 1.224553 | 0.524808 | 0.146610 |      |
| 2029 | 0.020280 | 0.011168 | 0.003685 | 1.216878 | 0.521519 | 0.139968 |      |
| 2030 | 0.025165 | 0.013624 | 0.004405 | 1.208741 | 0.518032 | 0.133677 | 2030 |
| 2031 | 0.347306 | 0.240067 | 0.076067 | 0.492917 | 0.211250 | 0.056660 |      |
| 2032 | 0.300980 | 0.234795 | 0.072904 | 0.468737 | 0.200887 | 0.054676 |      |
| 2033 | 0.271585 | 0.228669 | 0.069577 | 0.454009 | 0.194575 | 0.053055 |      |
| 2034 | 0.250096 | 0.222880 | 0.066455 | 0.442221 | 0.189523 | 0.051422 |      |
| 2035 | 0.234042 | 0.216716 | 0.063321 | 0.434402 | 0.186172 | 0.049985 | 2035 |
| 2036 | 0.218614 | 0.208712 | 0.059759 | 0.433552 | 0.185808 | 0.049153 |      |
| 2037 | 0.211306 | 0.206624 | 0.057974 | 0.419442 | 0.179761 | 0.046714 |      |
| 2038 | 0.200911 | 0.200282 | 0.055067 | 0.417675 | 0.179003 | 0.045561 |      |
| 2039 | 0.192187 | 0.194792 | 0.052483 | 0.414346 | 0.177577 | 0.044243 |      |
| 2040 | 0.193855 | 0.198392 | 0.052381 | 0.389094 | 0.166754 | 0.040594 | 2040 |
| 2041 | 0.184589 | 0.190685 | 0.049336 | 0.393554 | 0.168666 | 0.040034 |      |
| 2042 | 0.172577 | 0.179193 | 0.045432 | 0.408263 | 0.174970 | 0.040471 |      |
| 2043 | 0.193606 | 0.201763 | 0.050128 | 0.336178 | 0.144076 | 0.032444 |      |
| 2044 | 0.189420 | 0.198112 | 0.048234 | 0.331695 | 0.142155 | 0.031136 |      |
| 2045 | 0.193315 | 0.202351 | 0.048277 | 0.307021 | 0.131580 | 0.028015 | 2045 |
| 2046 | 0.174806 | 0.182614 | 0.042694 | 0.345605 | 0.148116 | 0.030639 |      |
| 2047 | 0.171499 | 0.179080 | 0.041028 | 0.342297 | 0.146699 | 0.029462 |      |
| 2048 | 0.168695 | 0.175654 | 0.039436 | 0.339185 | 0.145365 | 0.028320 |      |
| 2049 | 0.165925 | 0.172042 | 0.037850 | 0.336845 | 0.144362 | 0.027279 |      |
| 2050 | 0.163267 | 0.168749 | 0.036381 | 0.333656 | 0.142996 | 0.026222 | 2050 |
